# Supplementary material for: Enterobacterales plasmid sharing amongst human bloodstream infections, livestock, wastewater, and waterway niches in Oxfordshire, UK
Source: eLife journal article supplement (doi:10.7554/elife.85302), 2023-03-24

## Supplementary File 1

In order, this document contains

- (i) A metadata table for all plasmid clusters where every plasmid has at least one core gene. Presented are the cluster name, cluster size, mlst PubMLST genera of plasmid hosts, plasmid PlasmidFinder annotations, and plasmid NCBIAMRFinder annotations.
- (ii) A core gene phylogeny and consensus gene synteny heatmap for all clusters in the metadata table, in cluster size decreasing order. Core gene phylogeny scales are in single nucleotide polymorphisms (SNPs).

| Cluster name | Cluster size | Host-PubMLST(s)                   | PlasmidFinder                                                                                                                                        | AMRFinderPlus                                                                                                                                                                                                                                             |
|--------------|--------------|-----------------------------------|------------------------------------------------------------------------------------------------------------------------------------------------------|-----------------------------------------------------------------------------------------------------------------------------------------------------------------------------------------------------------------------------------------------------------|
| 1            | 123          | ecoli,cfreundii                   | Col156_1,IncFIB(AP001918)_1,IncFII(29)_1_pUTI89,IncFII_1,IncFIC(FII)_1                                                                               | aac(3)-Ild,aadA5,aph(3'')-Ib,aph(6)-Id,blaTEM-1,dfrA17,mph(A),qacEdelta1,sul1,sul2,tet(A),catA1,tet(B),blaTEM,blaCTX-M-27,blaTEM-30,dfrA8                                                                                                                 |
| 2            | 100          | ecoli,senterica                   | IncFIA_1,IncFIB(AP001918)_1,IncFIC(FII)_1,IncFII_1                                                                                                   | aph(3'')-Ib,aph(6)-Id,blaTEM-1,dfrA14,sul2,tet(A),dfrA5,aac(3)-Ild,catA1,tet(B),aph(3')-Ia,aadA1,aadA2,cmlA1,dfrA12,qacL,sul3,qacEdelta1,sul1,blaTEM-40,blaTEM,aadA5,dfrA17,catA2,floR                                                                    |
| 3            | 73           | ecoli,senterica,cfreundii         | Incl1_1_Alpha,Incl_Gamma_1                                                                                                                           | blaTEM-1,qnrS1,blaCTX-M-15,blaCTX-M-1,sul2,tet(A),mcr-5.1,aph(3')-Ia,aph(3'')-Ib,aph(6)-Id,tet(B),aadA1,dfrA1,qacEdelta1,sul1,aadA2,cmlA1,qacL,sul3,blaCMY-2,blaCTX-M-14,blaLAP-2,dfrA14,sat2,blaCTX-M-55,blaTEM                                          |
| 4            | 69           | ecoli,cfreundii,kpneumoniae       | Col156_1                                                                                                                                             | blaTEM-1,blaCTX-M-27                                                                                                                                                                                                                                      |
| 5            | 68           | ecoli,kpneumoniae,senterica       | IncFIA_1,IncFIB(AP001918)_1,IncFII(pRSB107)_1_pRSB107,Col156_1,IncFIB(pB171)_1_pB171,IncFII(pAMA1167-NDM-5)_1_pAMA1167-NDM-5,IncFIC(FII)_1,ColRNAI_1 | aph(3'')-Ib,aph(6)-Id,blaTEM-1,sul2,dfrA14,mph(A),tet(B),blaCTX-M-27,catA1,aph(3')-Ia,aadA1,dfrA1,qacEdelta1,sul1,tet(A),aadA5,dfrA17,aadA2,blaCARB-2,aac(3)-Ile,aac(6'')-Ib-cr5,blaCTX-M-15,blaOXA-1,catB3,aac(3)-Ild,erm(B),dfrA12                      |
| 7            | 58           | ecoli                             | IncB/O/K/Z_2,IncB/O/K/Z_3,IncB/O/K/Z_1                                                                                                               | aph(3'')-Ib,blaTEM-1,sul2,aph(6)-Id,aadA1,dfrA1,qacEdelta1,sul1,tet(A),dfrA14,blaTEM-30,tet(B),blaCTX-M-14,erm(B),qacE,aadA5,dfrA17,mph(A),blaTEM                                                                                                         |
| 9            | 51           | ecoli,senterica,kpneumoniae       | Col8282_1                                                                                                                                            |                                                                                                                                                                                                                                                           |
| 10           | 47           | ecoli                             | IncFIB(AP001918)_1,IncFIA_1,IncFIC(FII)_1                                                                                                            |                                                                                                                                                                                                                                                           |
| 11           | 43           | ecoli,cfreundii,senterica         | ColRNAI_1                                                                                                                                            |                                                                                                                                                                                                                                                           |
| 12           | 42           | ecoli                             | IncFIC(FII)_1,IncFII_1,NA,IncFII(pHN7A8)_1_pHN7A8,IncFII(pRSB107)_1_pRSB107,IncFII(pCoo)_1_pCoo,IncFIA_1,IncFIB(AP001918)_1                          | blaTEM-1,NA,aph(3'')-Ib,aph(6)-Id,sul2                                                                                                                                                                                                                    |
| 13           | 41           | kpneumoniae,koxytoca,ecoli        | IncFII_1_pKP91                                                                                                                                       | aac(3)-Ile,aac(6'')-Ib-cr5,aph(3'')-Ib,aph(6)-Id,blaCTX-M-15,blaOXA-1,blaTEM-1,catB3,dfrA14,sul2,qnrB1,tet(A),blaTEM                                                                                                                                      |
| 14           | 40           | ecoli                             | IncFIB(AP001918)_1,IncFIB(pB171)_1_pB171,IncFIA_1,IncFIC(FII)_1                                                                                      |                                                                                                                                                                                                                                                           |
| 15           | 38           | ecoli,cfreundii                   | Col156_1,IncFIB(AP001918)_1,IncFIC(FII)_1,IncFIA_1,IncFII(29)_1_pUTI89                                                                               | blaTEM-1,tet(B),aph(3'')-Ib,aph(6)-Id,sul2,mph(A),aadA1,blaSHV-1,qacEdelta1,sul1,tet(D),aadA2,dfrA12,blaSHV                                                                                                                                               |
| 16           | 37           | kpneumoniae,koxytoca              | IncFIB(K)_1_Kpn3,IncFII_1_pKP91                                                                                                                      | aadA1,blaSHV-1,dfrA1,qacEdelta1,sul1,tet(D),aph(3'')-Ib,aph(6)-Id,blaTEM-1,dfrA14,mph(A),sul2,tet(A),aph(3')-Ia,aac(3)-Ile,blaSCO-1,catA1,dfrA8,aac(6'')-Ib-cr5,blaCTX-M-15,blaOXA-1,catB3,qnrB1,blaSHV,dfrA7,aac(3)-Ild,aadA2,blaAAK,blaSHV-12,blaSHV-2A |
| 17           | 35           | ecoli                             | ColRNAI_1                                                                                                                                            | blaTEM                                                                                                                                                                                                                                                    |
| 18           | 34           | kpneumoniae                       |                                                                                                                                                      | blaCTX-M-15                                                                                                                                                                                                                                               |
| 19           | 33           | kpneumoniae                       | IncFIB(K)_1_Kpn3                                                                                                                                     |                                                                                                                                                                                                                                                           |
| 20           | 32           | kpneumoniae                       | IncFIA(H11)_1_HI1                                                                                                                                    |                                                                                                                                                                                                                                                           |
| 21           | 29           | ecoli,kpneumoniae                 | Col8282_1,Col(MG828)_1                                                                                                                               |                                                                                                                                                                                                                                                           |
| 22           | 29           | ecoli                             | Col(BS512)_1                                                                                                                                         |                                                                                                                                                                                                                                                           |
| 23           | 26           | ecoli                             | IncX1_1                                                                                                                                              | blaTEM-1,sul2,tet(A)                                                                                                                                                                                                                                      |
| 24           | 25           | ecoli                             | Col156_1                                                                                                                                             |                                                                                                                                                                                                                                                           |
| 25           | 24           | ecoli,cfreundii                   | RepA_1_pKPC-CAV1321                                                                                                                                  | aac(3)-Ild,aadA2,aph(3'')-Ib,aph(6)-Id,blaTEM-1,dfrA12,mph(A),qacEdelta1,sul1,sul2,tet(B)                                                                                                                                                                 |
| 27           | 23           | ecoli                             | IncFIB(pHCM2)_1_pHCM2                                                                                                                                | blaCTX-M-15                                                                                                                                                                                                                                               |
| 28           | 21           | ecloacae,koxytoca                 | ColRNAI_1                                                                                                                                            |                                                                                                                                                                                                                                                           |
| 30           | 21           | ecoli                             | Col156_1,IncFIA_1,IncFIB(AP001918)_1,IncFIC(FII)_1                                                                                                   | aac(3)-Ile,aac(6'')-Ib-cr5,aadA5,blaCTX-M-15,blaOXA-1,catB3,dfrA17,mph(A),qacEdelta1,sul1,blaTEM-1,tet(B),tet(A),aac(3)-Ild,catA1,blaDHA-1,qacE,qnrB4                                                                                                     |
| 31           | 20           | ecoli,cfreundii                   | Col156_1                                                                                                                                             |                                                                                                                                                                                                                                                           |
| 33           | 19           | ecoli,koxytoca                    | IncHI2_1,IncHI2A_1,RepA_1_pKPC-CAV1321                                                                                                               | aadA1,aph(3'')-Ib,aph(6)-Id,blaTEM-1,dfrA1,qacEdelta1,sul1,sul2,tet(A),aac(3)-Iva,aadA2,aph(3'')-Ia,aph(3'')-Ila,aph(4)-Ia,ble,cmlA1,dfrA12,qacL,sul3,oqxB,tet(B),NA,mef(B),floR,mph(B)                                                                   |
| 34           | 18           | koxytoca,ecloacae,ecoli,cfreundii | Col440II_1,ColRNAI_1                                                                                                                                 |                                                                                                                                                                                                                                                           |
| 35           | 17           | ecoli                             | Incl2_1_Delta,Incl2_1                                                                                                                                |                                                                                                                                                                                                                                                           |
| 36           | 17           | ecoli                             | IncFIB(AP001918)_1,IncFIC(FII)_1,IncFIA_1,IncFIB(pB171)_1_pB171                                                                                      |                                                                                                                                                                                                                                                           |
| 37           | 16           | ecoli                             | ColRNAI_1                                                                                                                                            |                                                                                                                                                                                                                                                           |
| 38           | 15           | ecoli,cfreundii,koxytoca          | ColRNAI_1                                                                                                                                            | aph(3'')-Ib,aph(6)-Id,dfrA14,sul2,blaTEM-1,tet(A)                                                                                                                                                                                                         |
| 39           | 15           | ecoli                             |                                                                                                                                                      | blaTEM-1                                                                                                                                                                                                                                                  |
| 41           | 14           | ecoli                             | ColRNAI_1                                                                                                                                            |                                                                                                                                                                                                                                                           |
| 42           | 14           | ecloacae                          | IncFIB(pECLA)_1_pECLA,IncFII(pECLA)_1_pECLA,IncR_1                                                                                                   |                                                                                                                                                                                                                                                           |
| 43           | 14           | ecoli,kpneumoniae                 | IncX4_1,IncX4_2                                                                                                                                      | aadA1,blaTEM-31,Inu(G),mcr-1,blaCTX-M-14                                                                                                                                                                                                                  |
| 44           | 14           | ecoli                             | Col440I_1,ColRNAI_1                                                                                                                                  |                                                                                                                                                                                                                                                           |
| 45           | 14           | ecoli                             |                                                                                                                                                      |                                                                                                                                                                                                                                                           |
| 46           | 14           | ecoli                             | ColRNAI_1                                                                                                                                            |                                                                                                                                                                                                                                                           |
| 47           | 13           | ecoli,cfreundii                   |                                                                                                                                                      |                                                                                                                                                                                                                                                           |
| 48           | 13           | kpneumoniae,ecloacae,koxytoca     | Col440I_1,Col440II_1                                                                                                                                 |                                                                                                                                                                                                                                                           |
| 49           | 13           | kpneumoniae                       | Col440I_1                                                                                                                                            |                                                                                                                                                                                                                                                           |
| 50           | 13           | ecoli                             | IncX1_1                                                                                                                                              | aadA1,aadA2,blaCTX-M-32,cmlA1,dfrA12,qacL,qnrB19,sul3                                                                                                                                                                                                     |
| 51           | 12           | koxytoca,ecloacae                 | Col440II_1,ColRNAI_1,Col440I_1                                                                                                                       |                                                                                                                                                                                                                                                           |
| 52           | 11           | ecoli                             | ColRNAI_1                                                                                                                                            |                                                                                                                                                                                                                                                           |
| 53           | 11           | koxytoca,kpneumoniae              | Col440I_1,Col440II_1                                                                                                                                 |                                                                                                                                                                                                                                                           |
| 54           | 11           | ecoli                             | Col156_1                                                                                                                                             |                                                                                                                                                                                                                                                           |
| 55           | 11           | ecoli                             | Col156_1                                                                                                                                             |                                                                                                                                                                                                                                                           |
| 56           | 11           | kpneumoniae,koxytoca              | Col440I_1,IncFIB(K)_1_Kpn3,IncFII_1_pKP91,IncR_1                                                                                                     |                                                                                                                                                                                                                                                           |
| 57           | 11           | ecoli,koxytoca                    | IncFIA(H11)_1_HI1,IncHI1A_1,IncHI1B(R27)_1_R27                                                                                                       | aph(3'')-Ib,aph(3')-Ia,aph(6)-Id,blaCTX-M-1,mph(A),sul2,tet(B)                                                                                                                                                                                            |
| 58           | 11           | ecoli,kpneumoniae                 | IncN_1,ColE10_1                                                                                                                                      | aph(3'')-Ib,aph(6)-Id,blaTEM-54,dfrA14,sul2,tet(A),aadA22,dfrA1,qacEdelta1,sul1,blaCTX-M-15,blaTEM-1,aac(6'')-Ib-cr5,aadA16,arr-3,dfrA27,qnrB6                                                                                                            |
| 59           | 11           | ecoli                             | IncHI1B(CIT)_1_pNDM-CIT,p0111_1,IncFIB(K)_1_Kpn3                                                                                                     | blaTEM,aadA1,dfrA1,qacEdelta1,sul1,tet(A),blaTEM-1                                                                                                                                                                                                        |
| 60           | 10           | ecoli                             |                                                                                                                                                      |                                                                                                                                                                                                                                                           |
| 61           | 10           | ecoli                             | ColRNAI_1                                                                                                                                            |                                                                                                                                                                                                                                                           |
| 62           | 10           | ecloacae,kpneumoniae              | Col440II_1,ColRNAI_1                                                                                                                                 |                                                                                                                                                                                                                                                           |
| 63           | 10           | ecoli,kpneumoniae,ecloacae        | IncN_1                                                                                                                                               |                                                                                                                                                                                                                                                           |
| 64           | 10           | ecoli                             | IncY_1,p0111_1                                                                                                                                       | aadA5,blaCTX-M-15,dfrA17,mph(A),qacEdelta1,sul1                                                                                                                                                                                                           |
| 66           | 10           | ecoli                             | IncFIA(H11)_1_HI1,IncFIB(K)_1_Kpn3                                                                                                                   | tet(A)                                                                                                                                                                                                                                                    |
| 67           | 10           | ecoli                             | ColRNAI_1                                                                                                                                            |                                                                                                                                                                                                                                                           |
| 68           | 10           | ecloacae,kpneumoniae              | Col440II_1,ColRNAI_1                                                                                                                                 |                                                                                                                                                                                                                                                           |
| 69           | 10           | cfreundii,ecloacae                | ColRNAI_1,Col440I_1                                                                                                                                  |                                                                                                                                                                                                                                                           |

Cluster 1  
116 core genes  
358 accessory genes

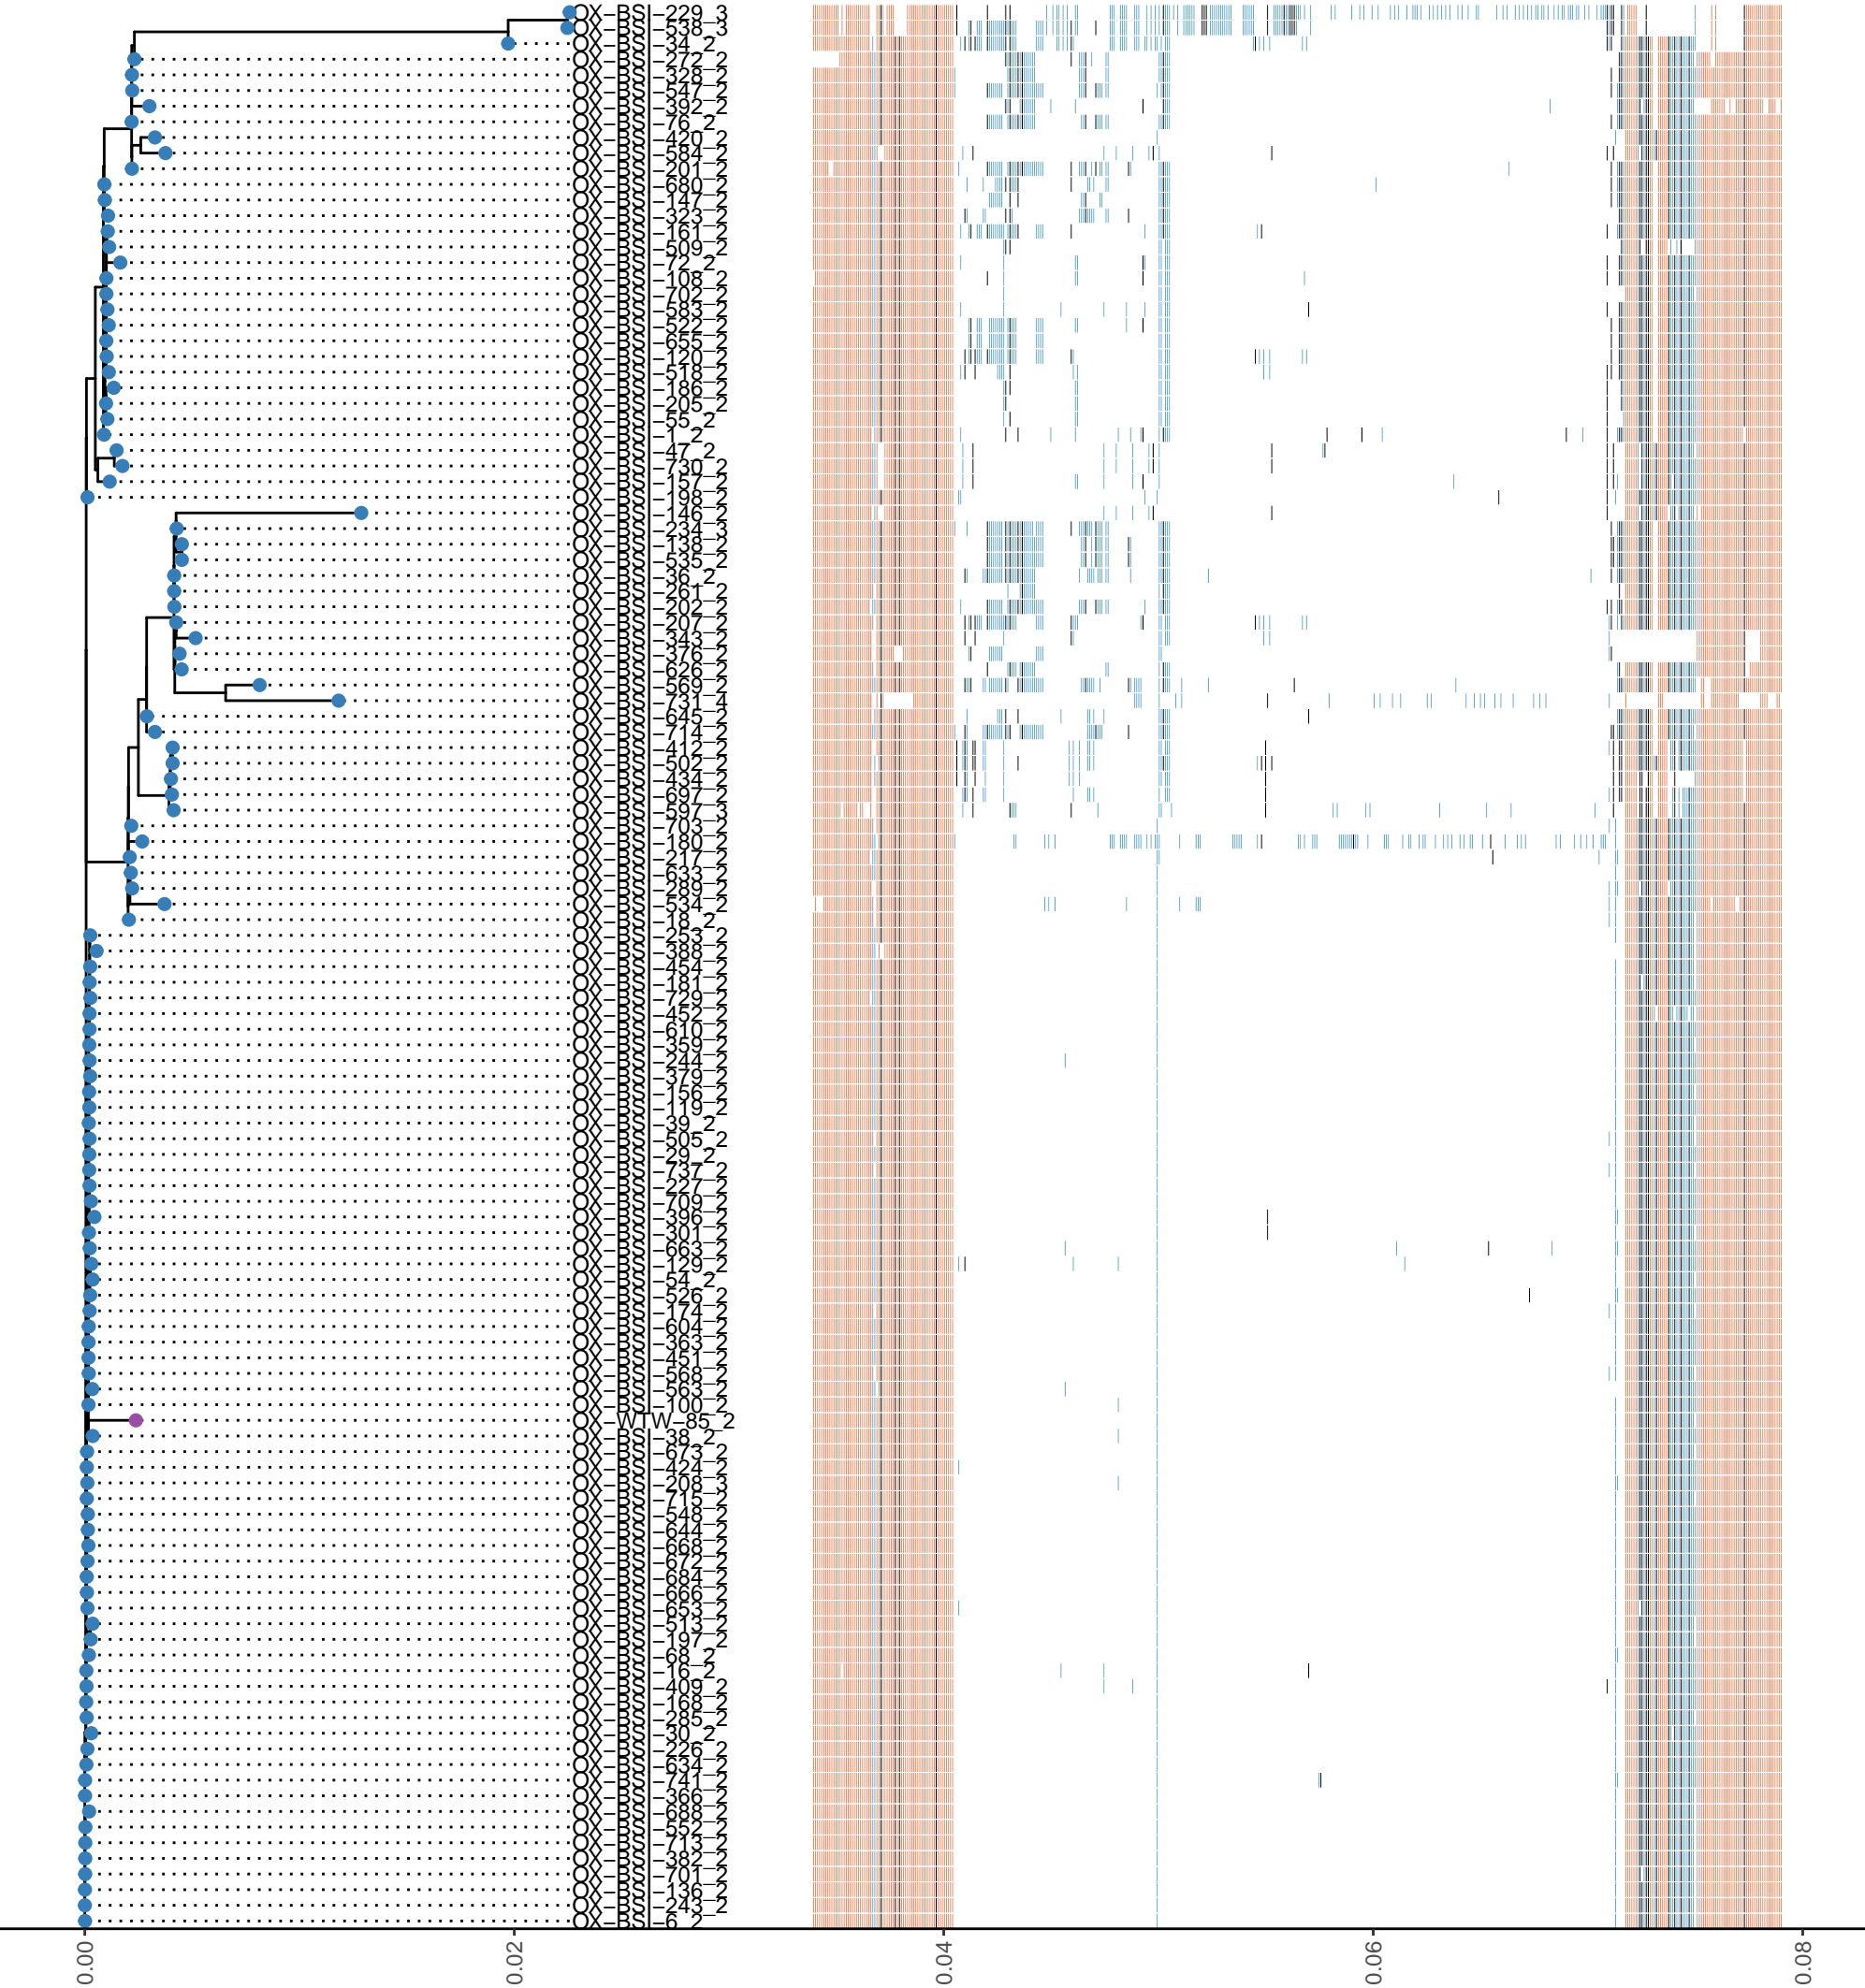

Gene type

- Absent
- Core
- Accessory
- Transposase

Compartment

- BSI
- Environmental
- Livestock
- WwTW

Cluster 2  
52 core genes  
628 accessory genes

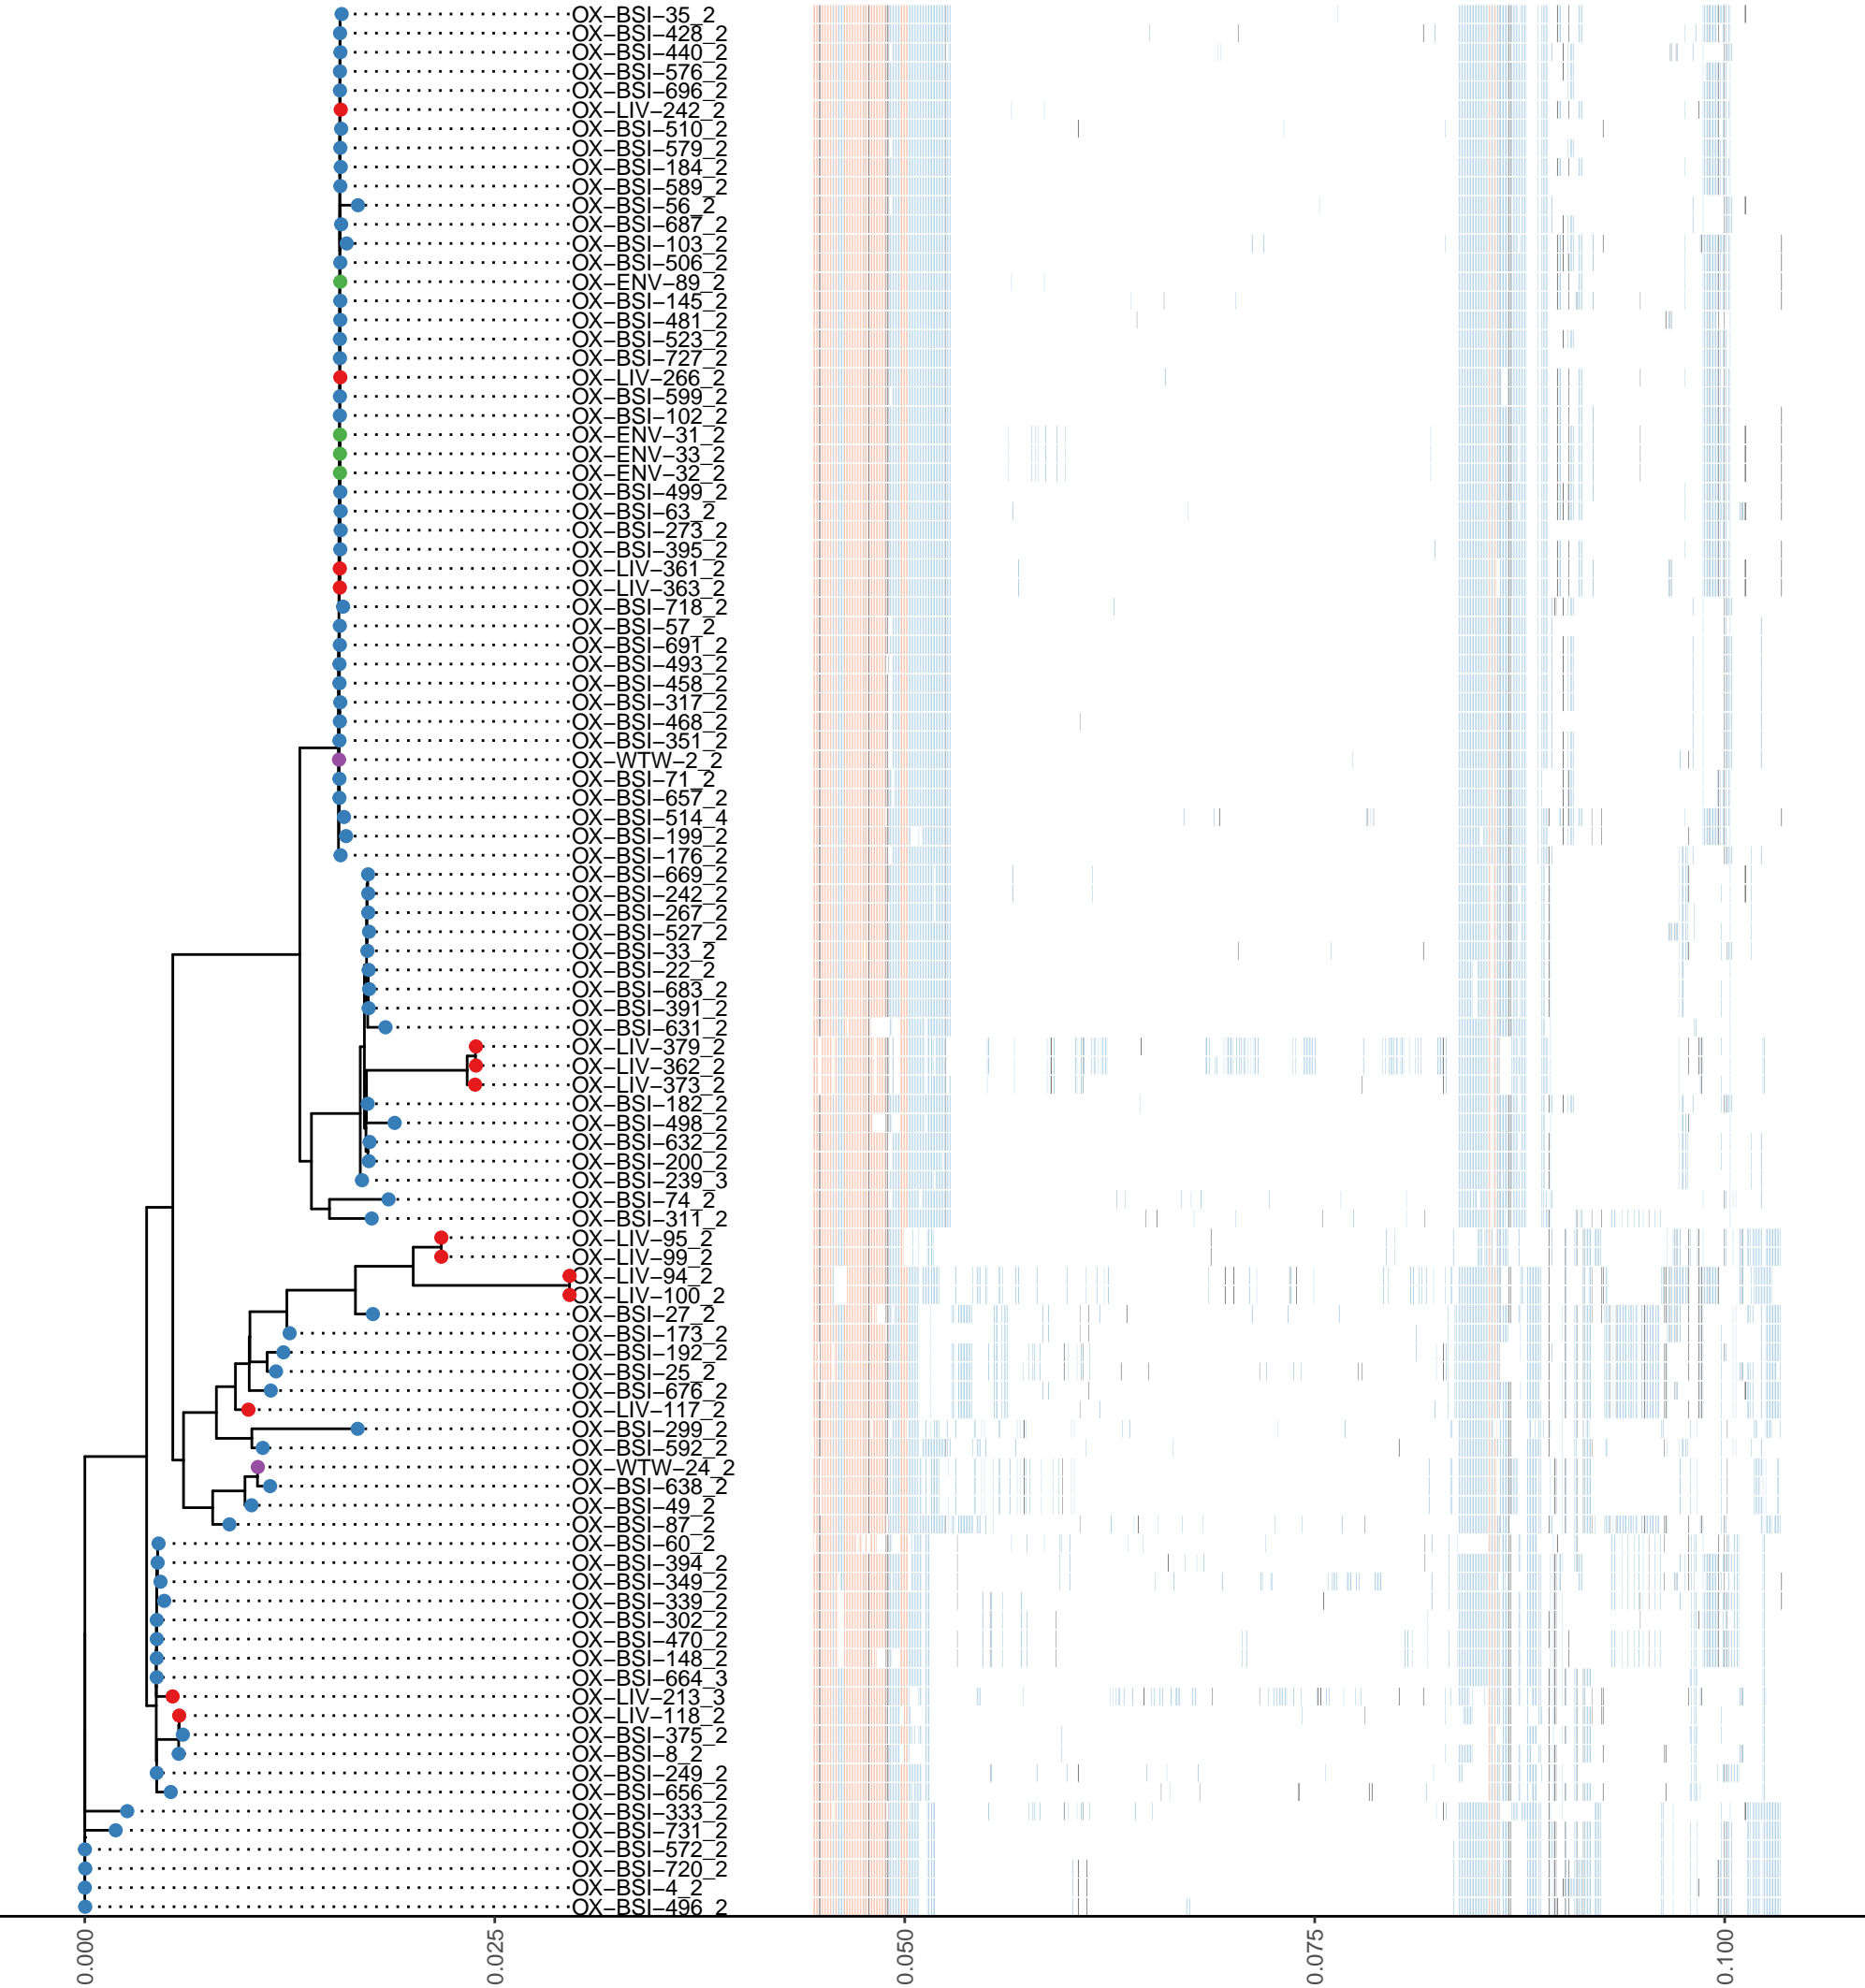

Cluster 3  
71 core genes  
377 accessory genes

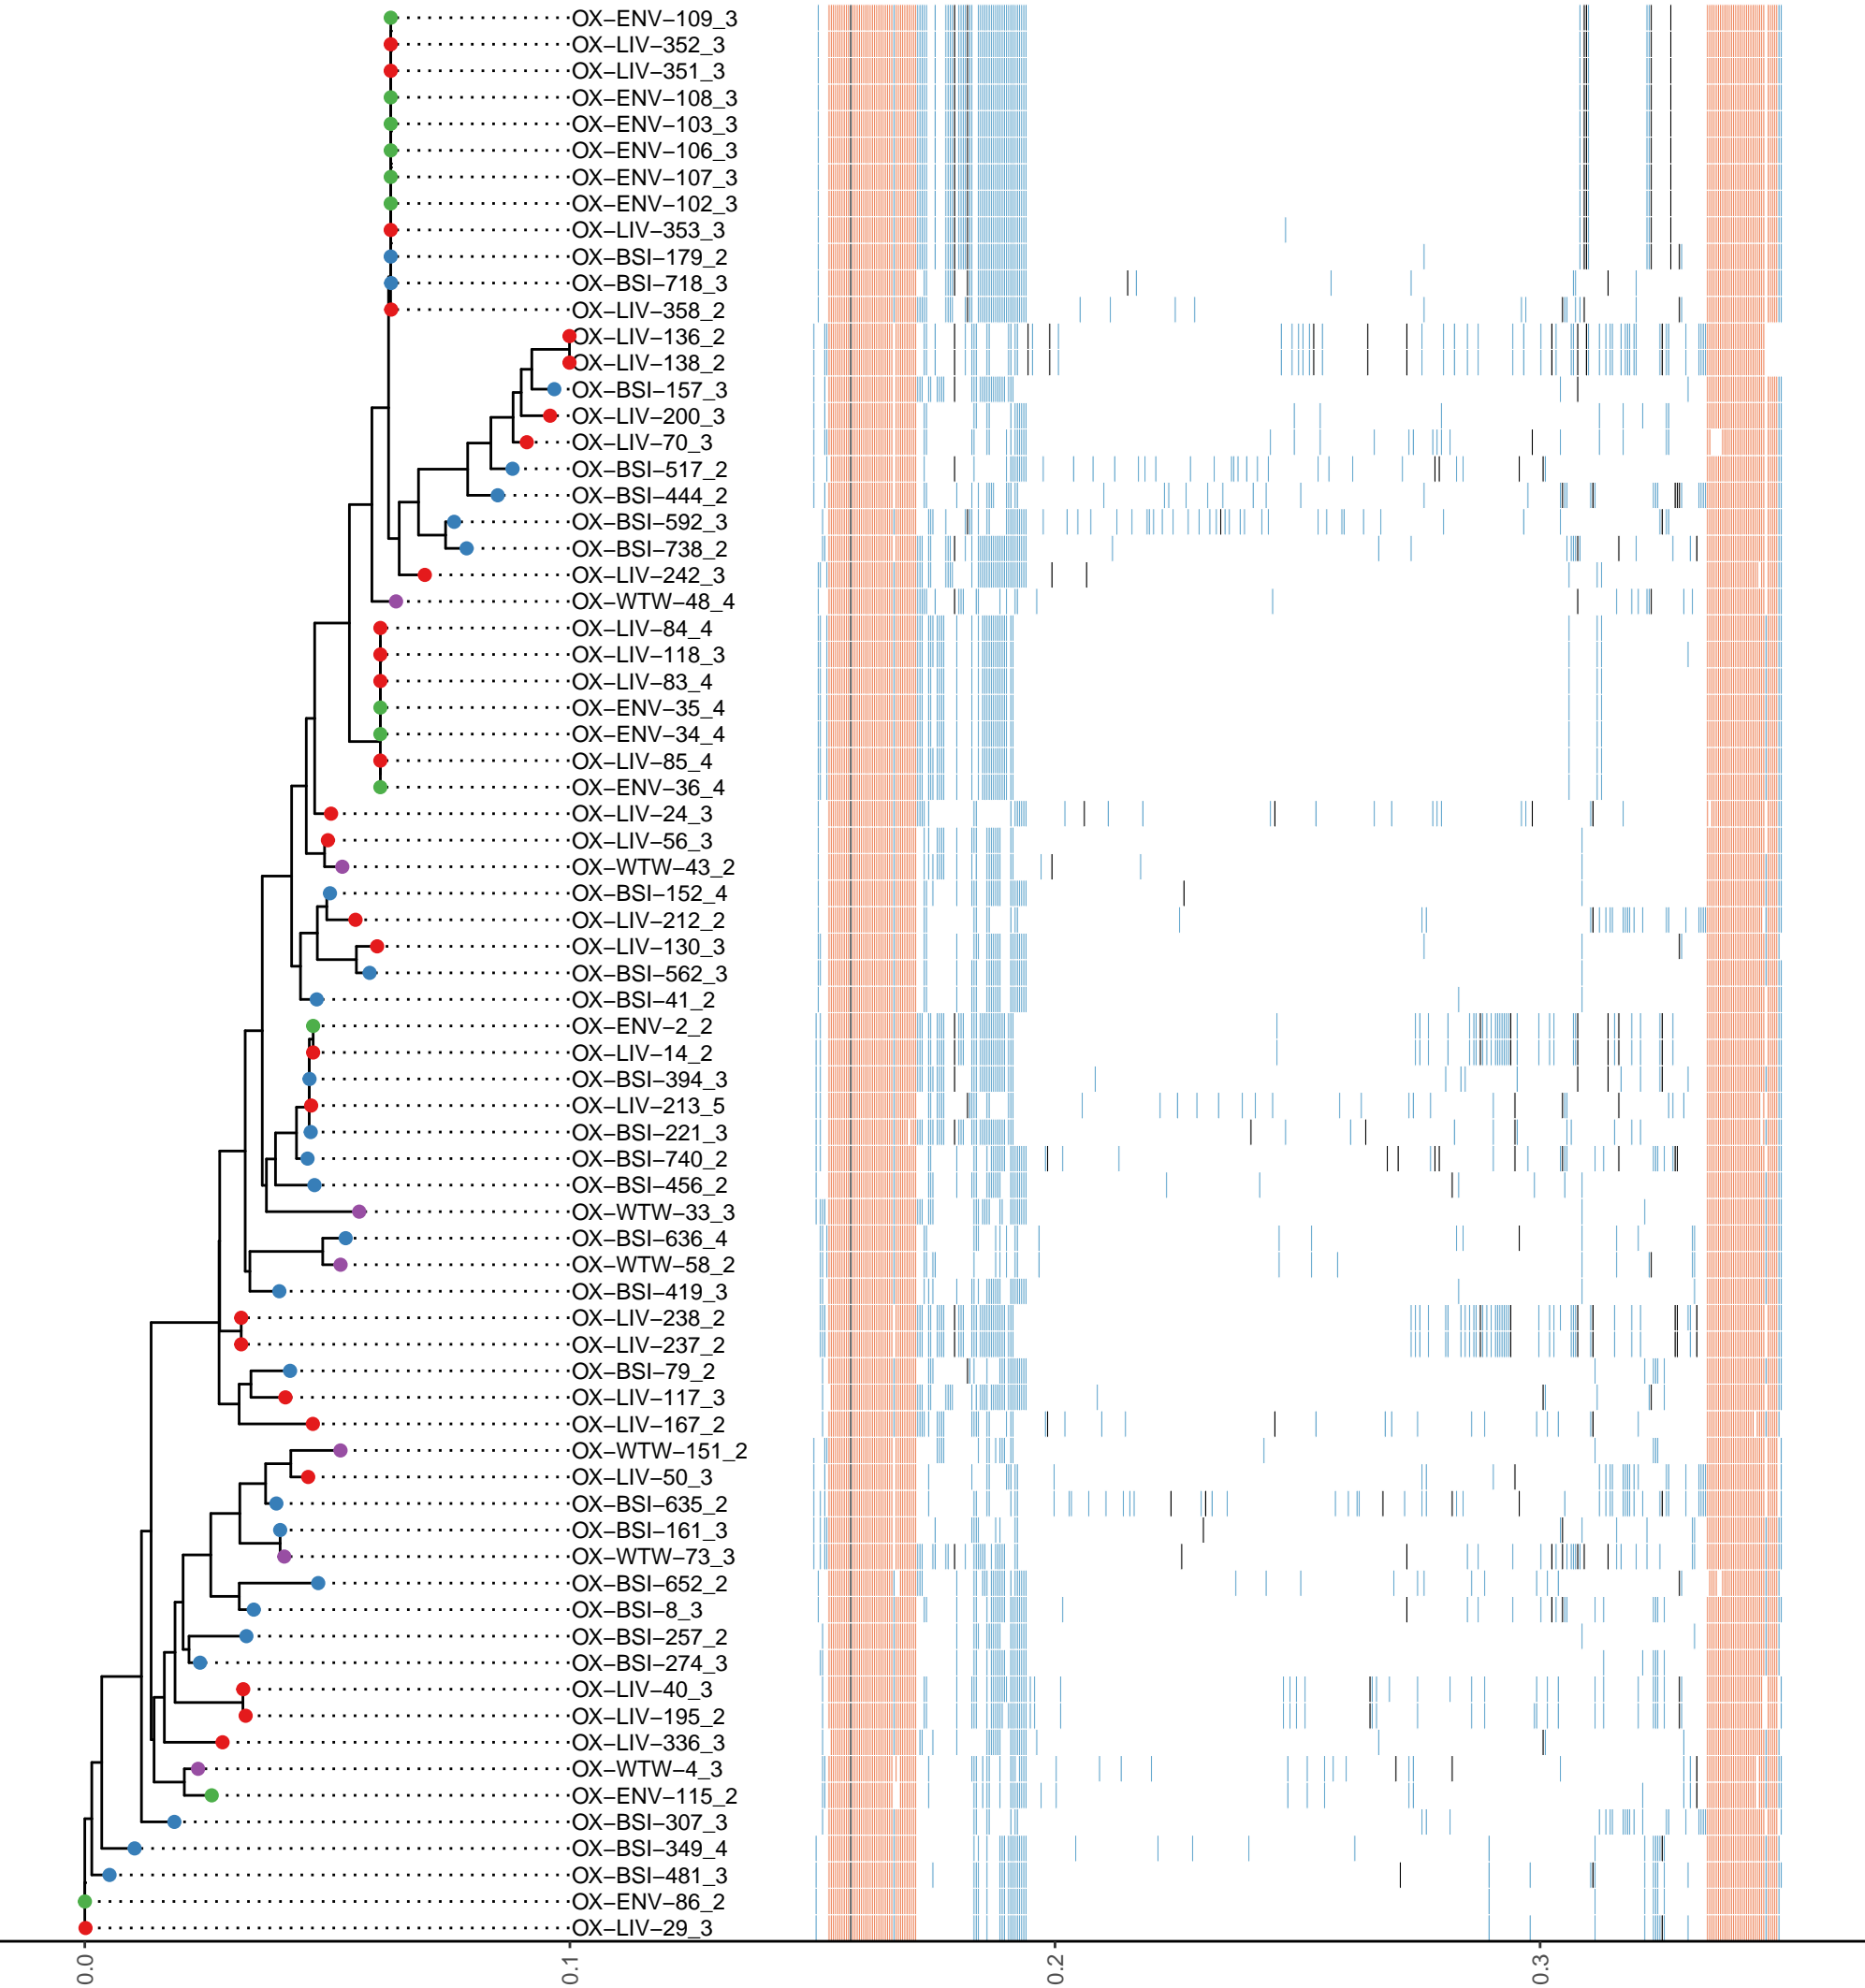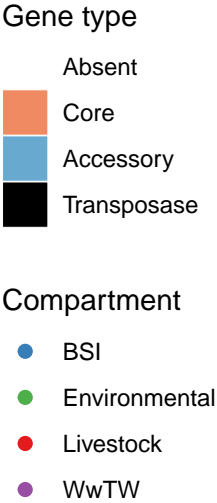

Cluster 4  
5 core genes  
13 accessory genes

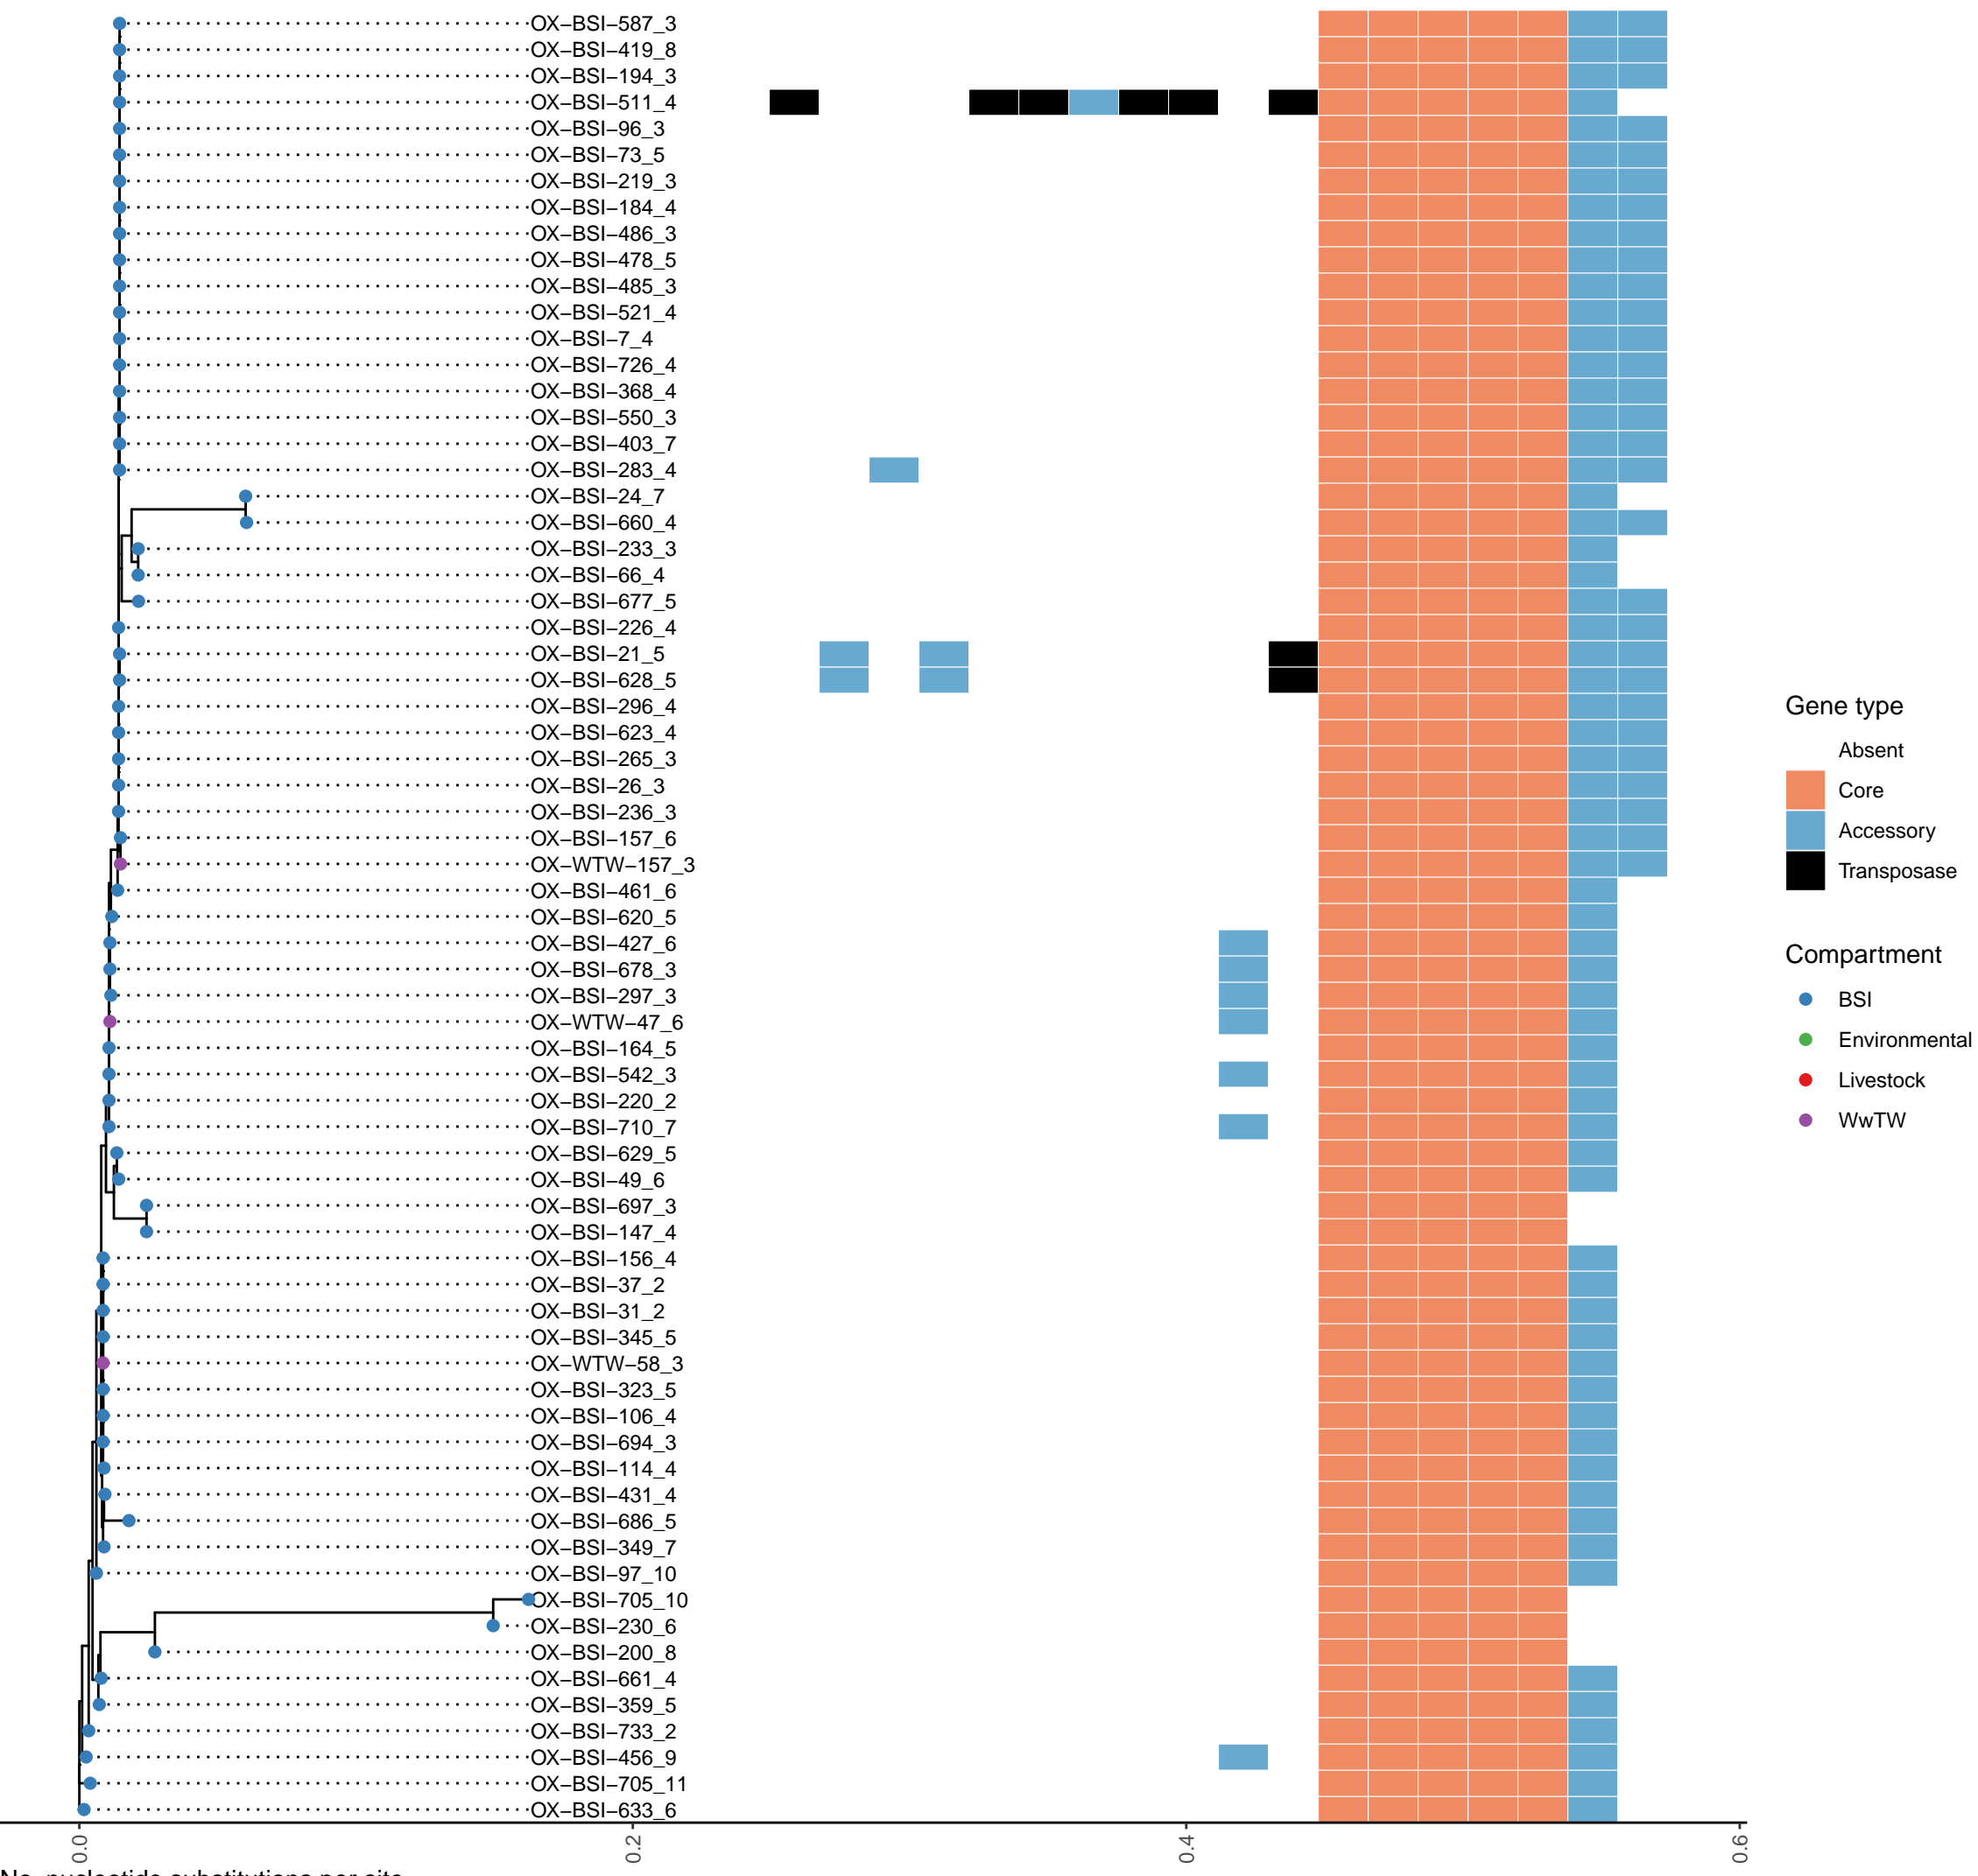

No. nucleotide substitutions per site

Cluster 5  
18 core genes  
613 accessory genes

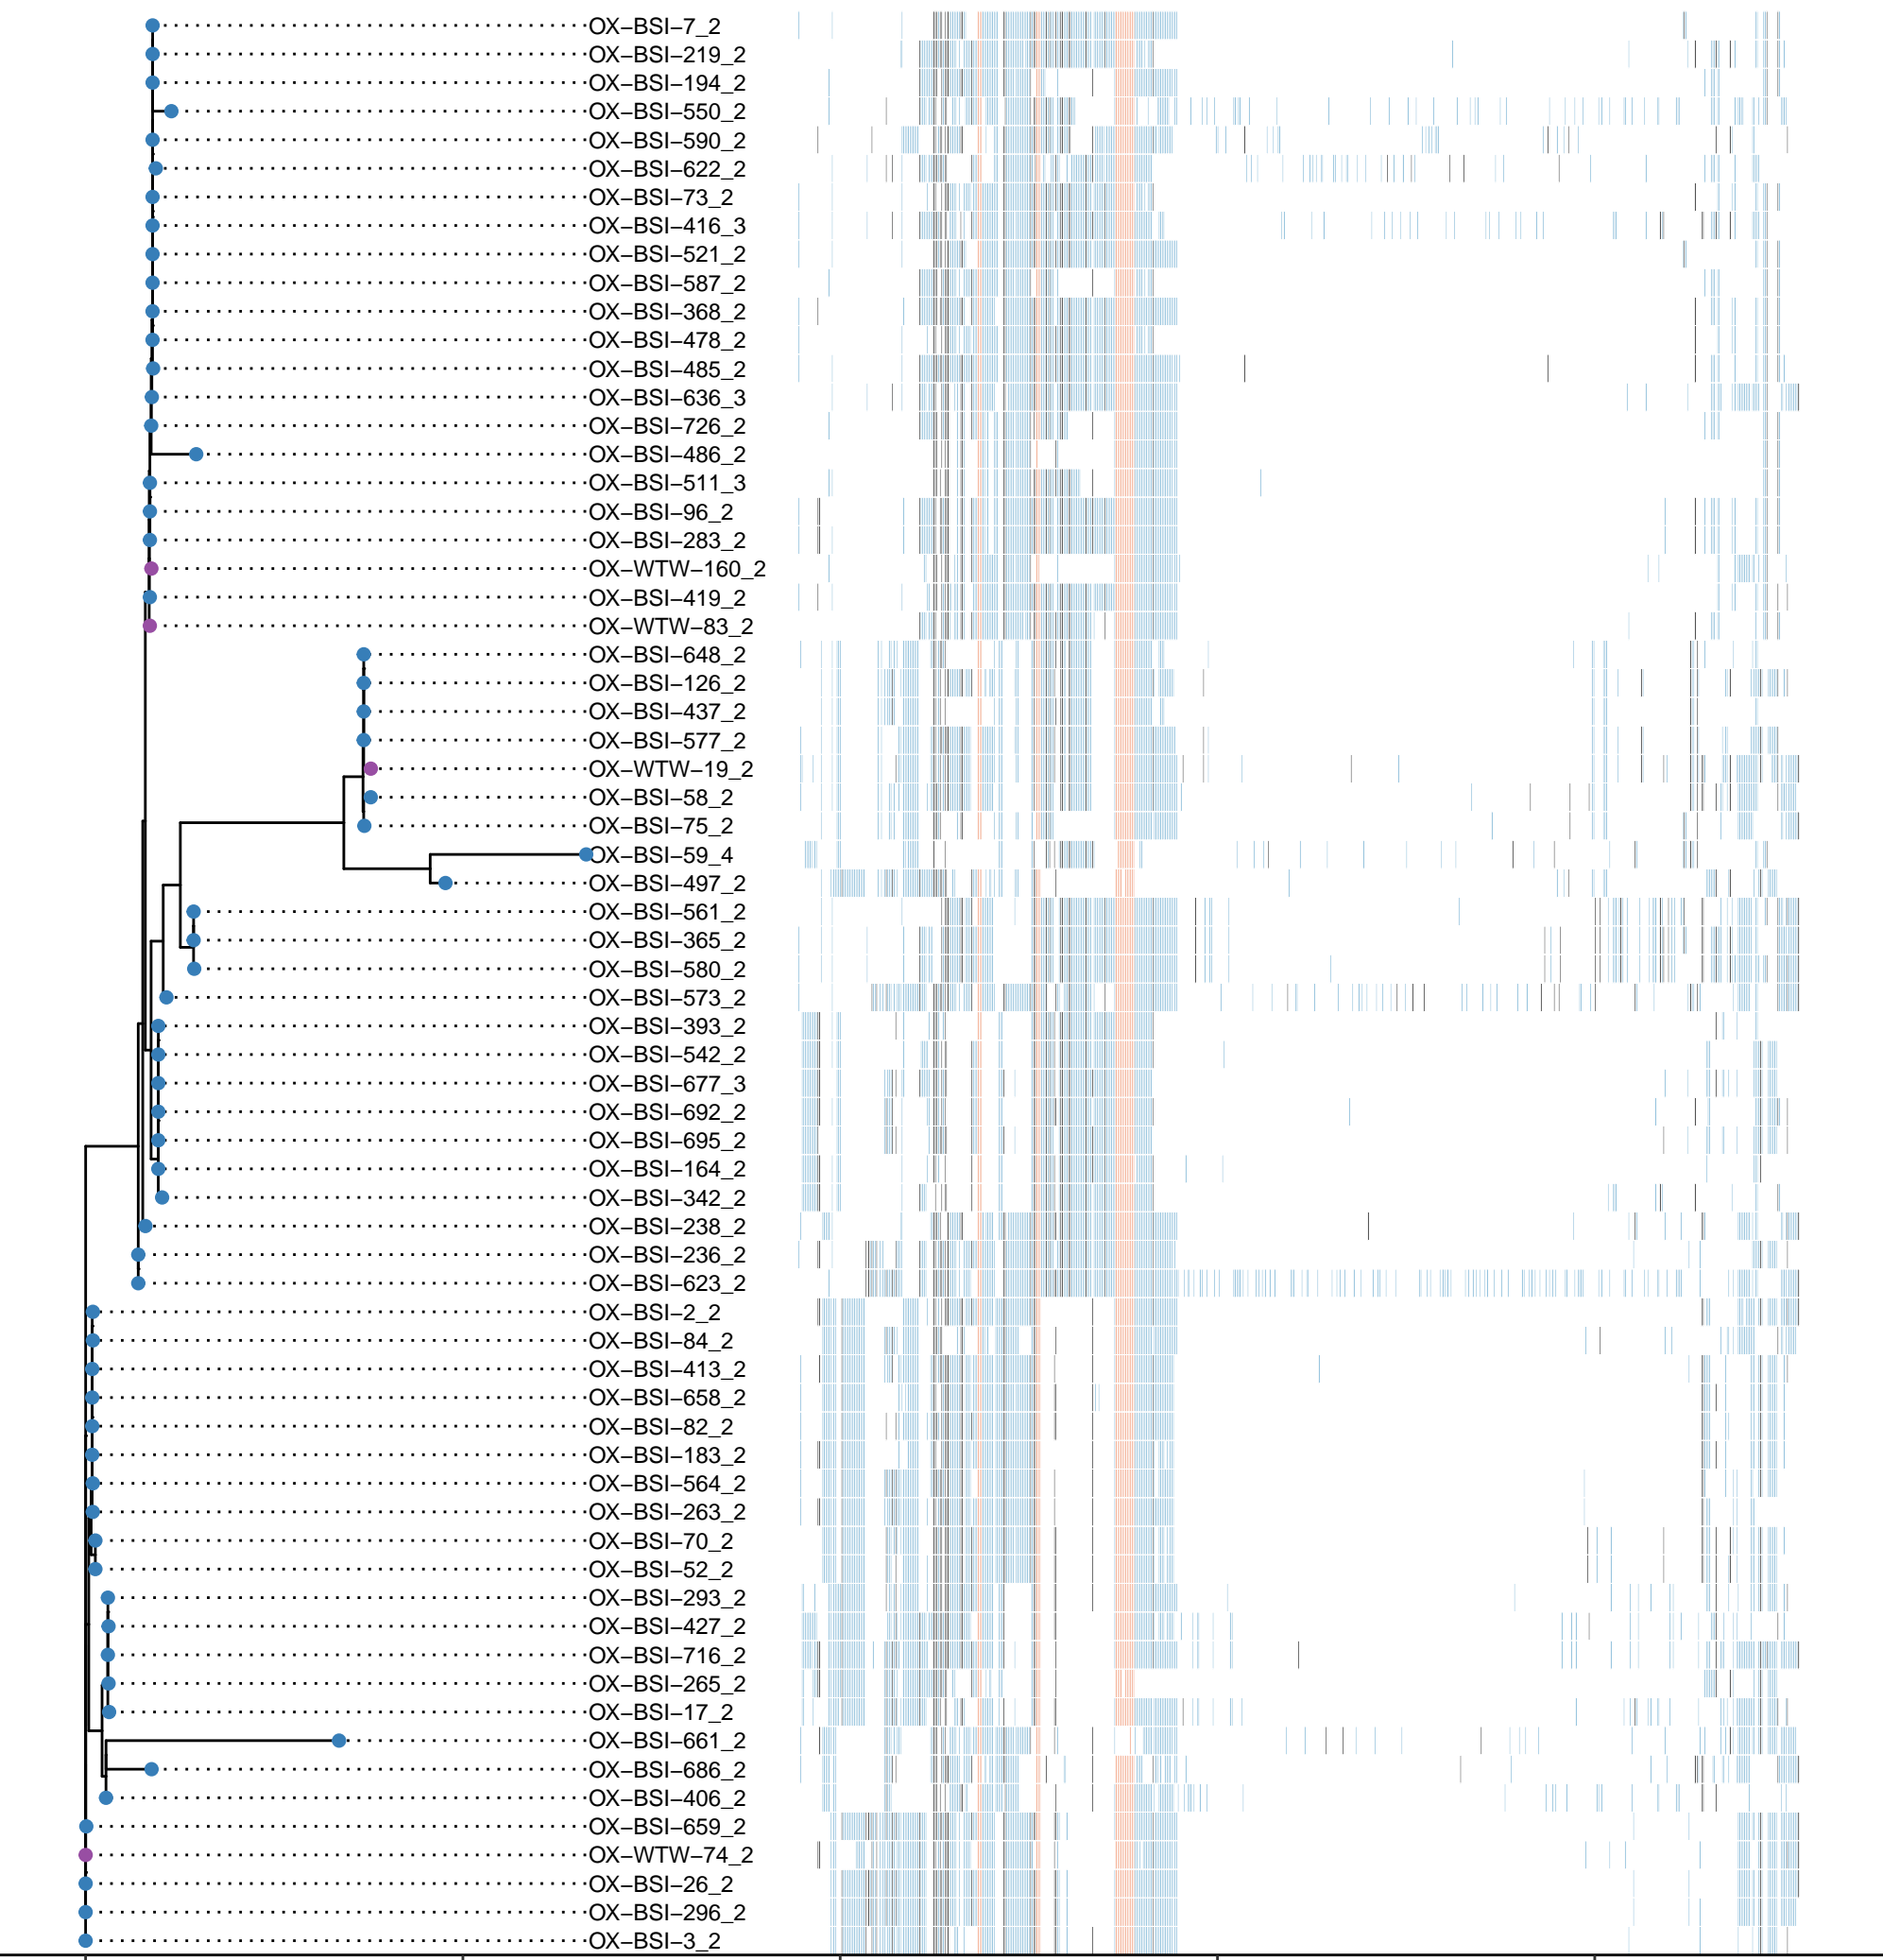

Gene type

- Absent
- Core
- Accessory
- Transposase

Compartment

- BSI
- Environmental
- Livestock
- WwTW

No. nucleotide substitutions per site

Cluster 7  
52 core genes  
279 accessory genes

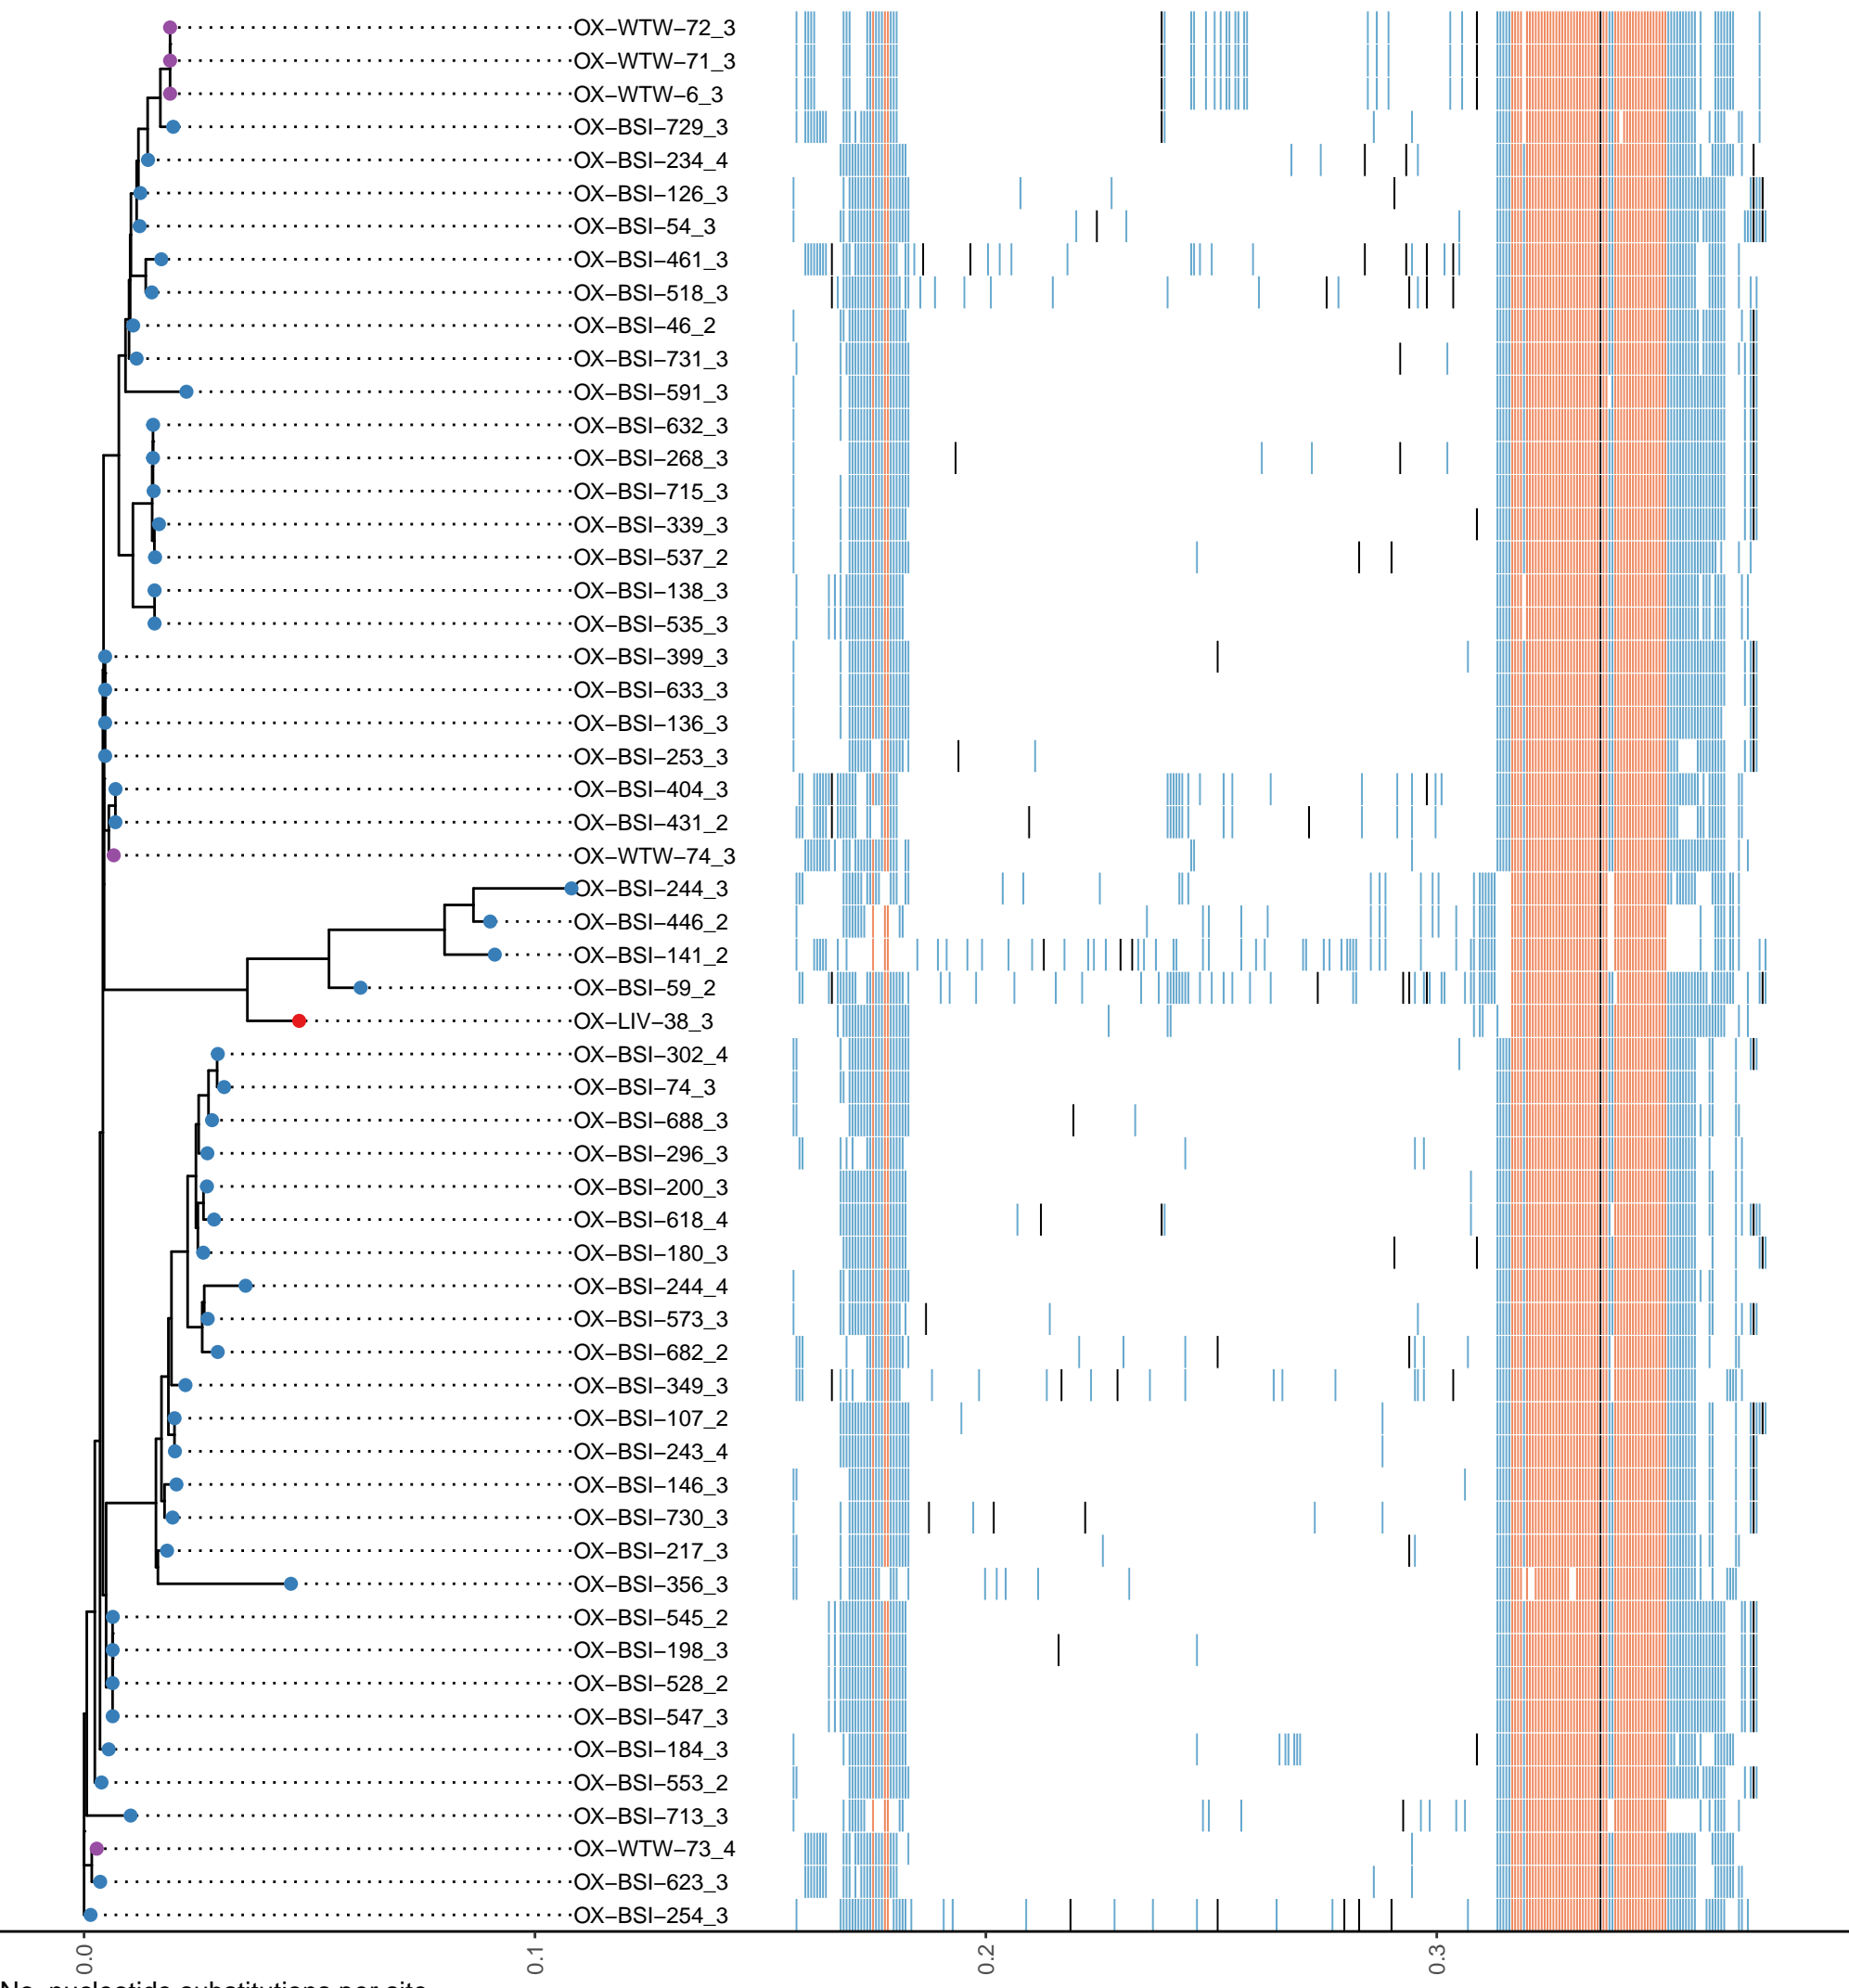

Gene type

- Absent
- Core
- Accessory
- Transposase

Compartment

- BSI
- Environmental
- Livestock
- WwTW

Cluster 9  
3 core genes  
3 accessory genes

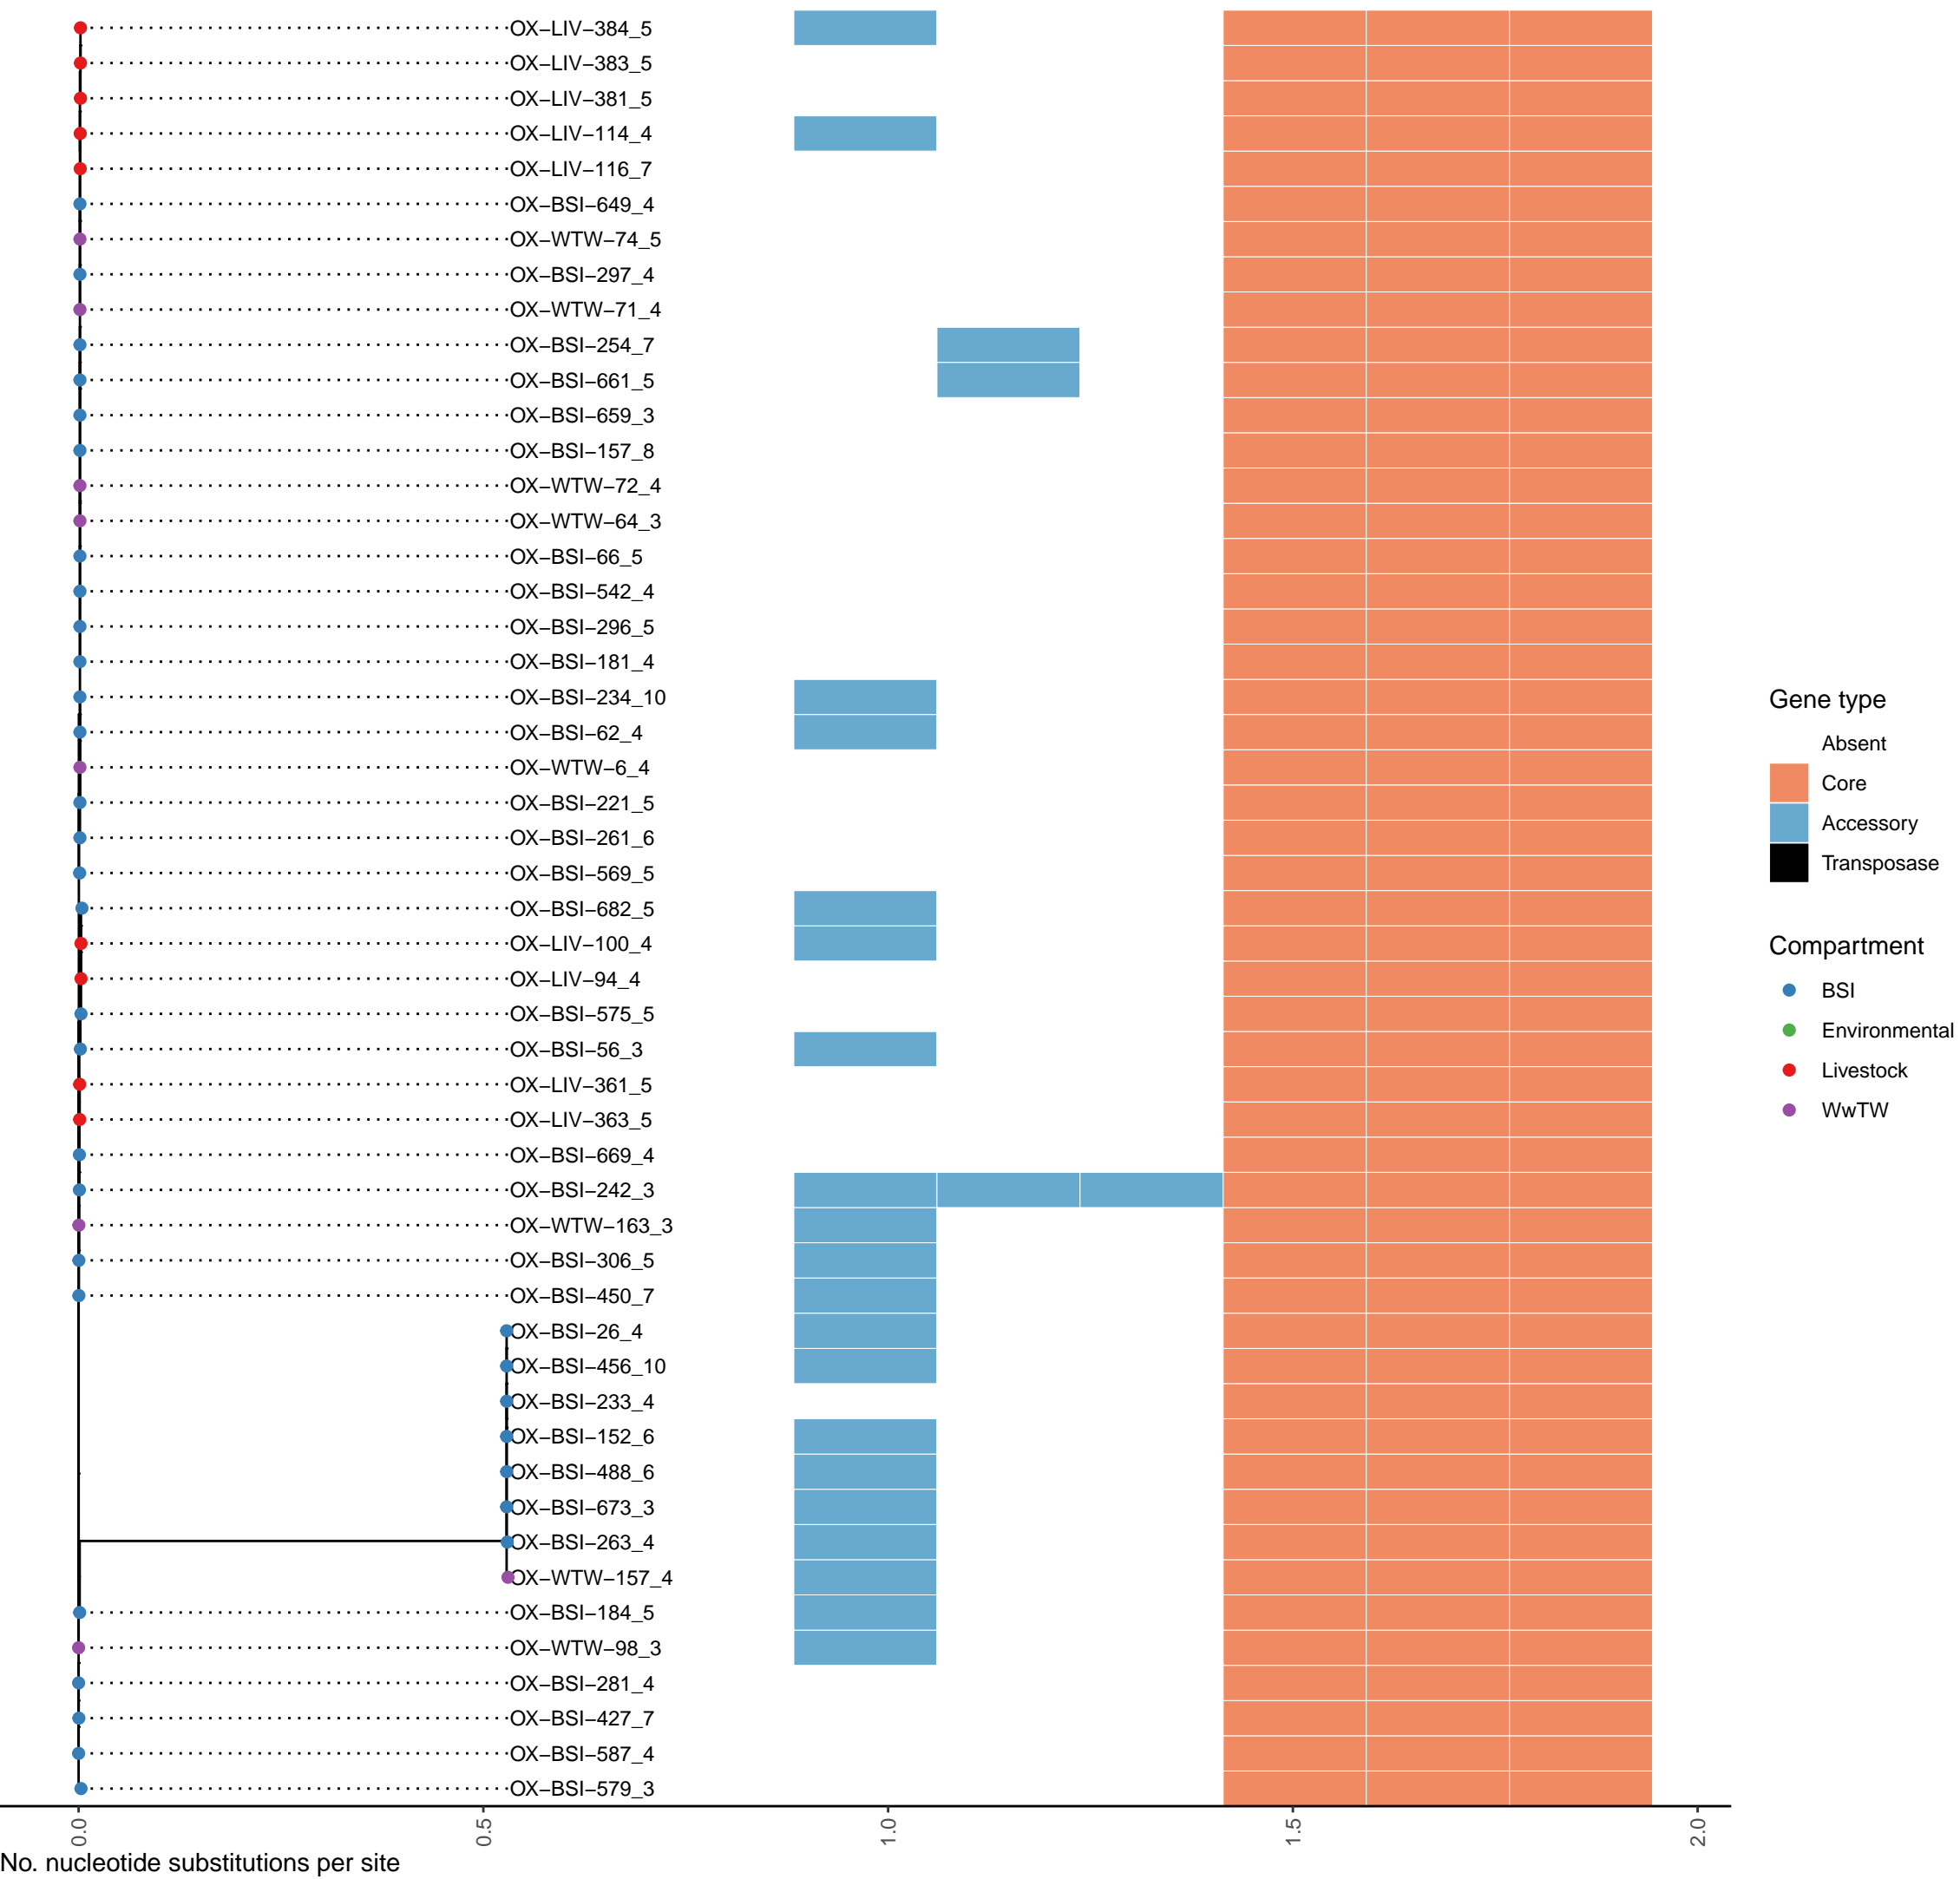

Cluster 10  
32 core genes  
260 accessory genes

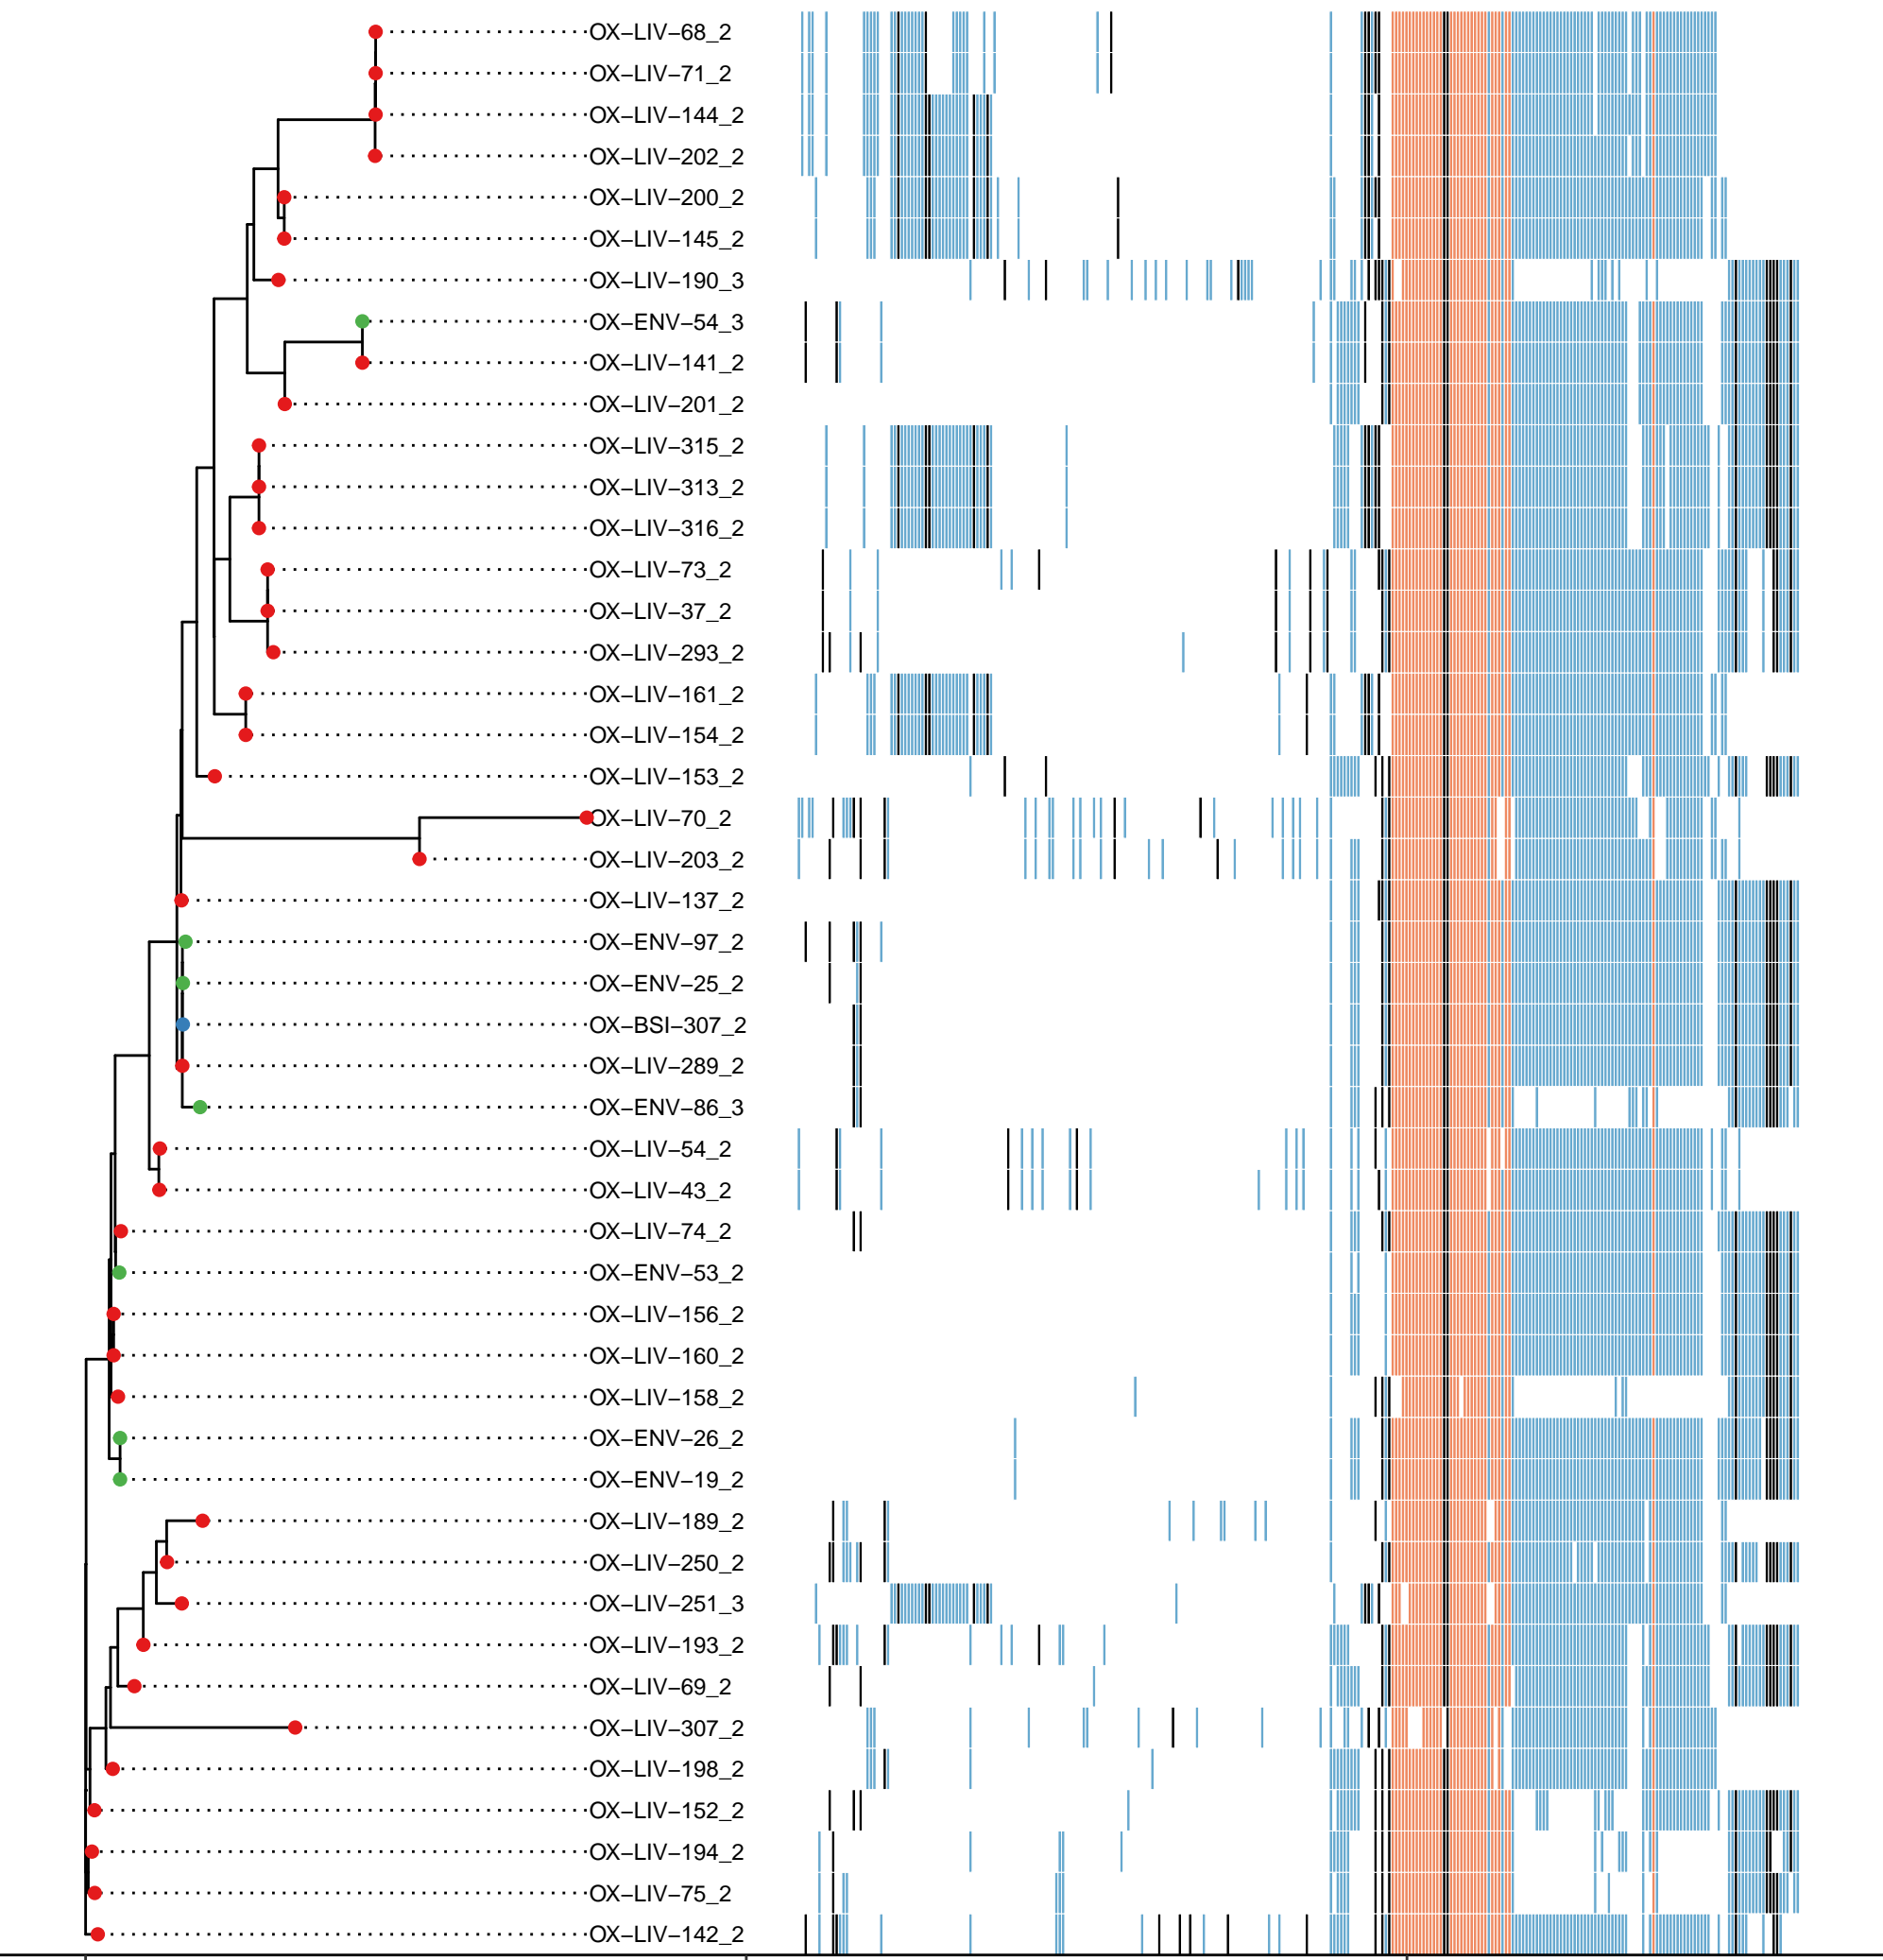

Gene type

- Absent
- Core
- Accessory
- Transposase

Compartment

- BSI
- Environmental
- Livestock
- WwTW

No. nucleotide substitutions per site

Cluster 11  
4 core genes  
9 accessory genes

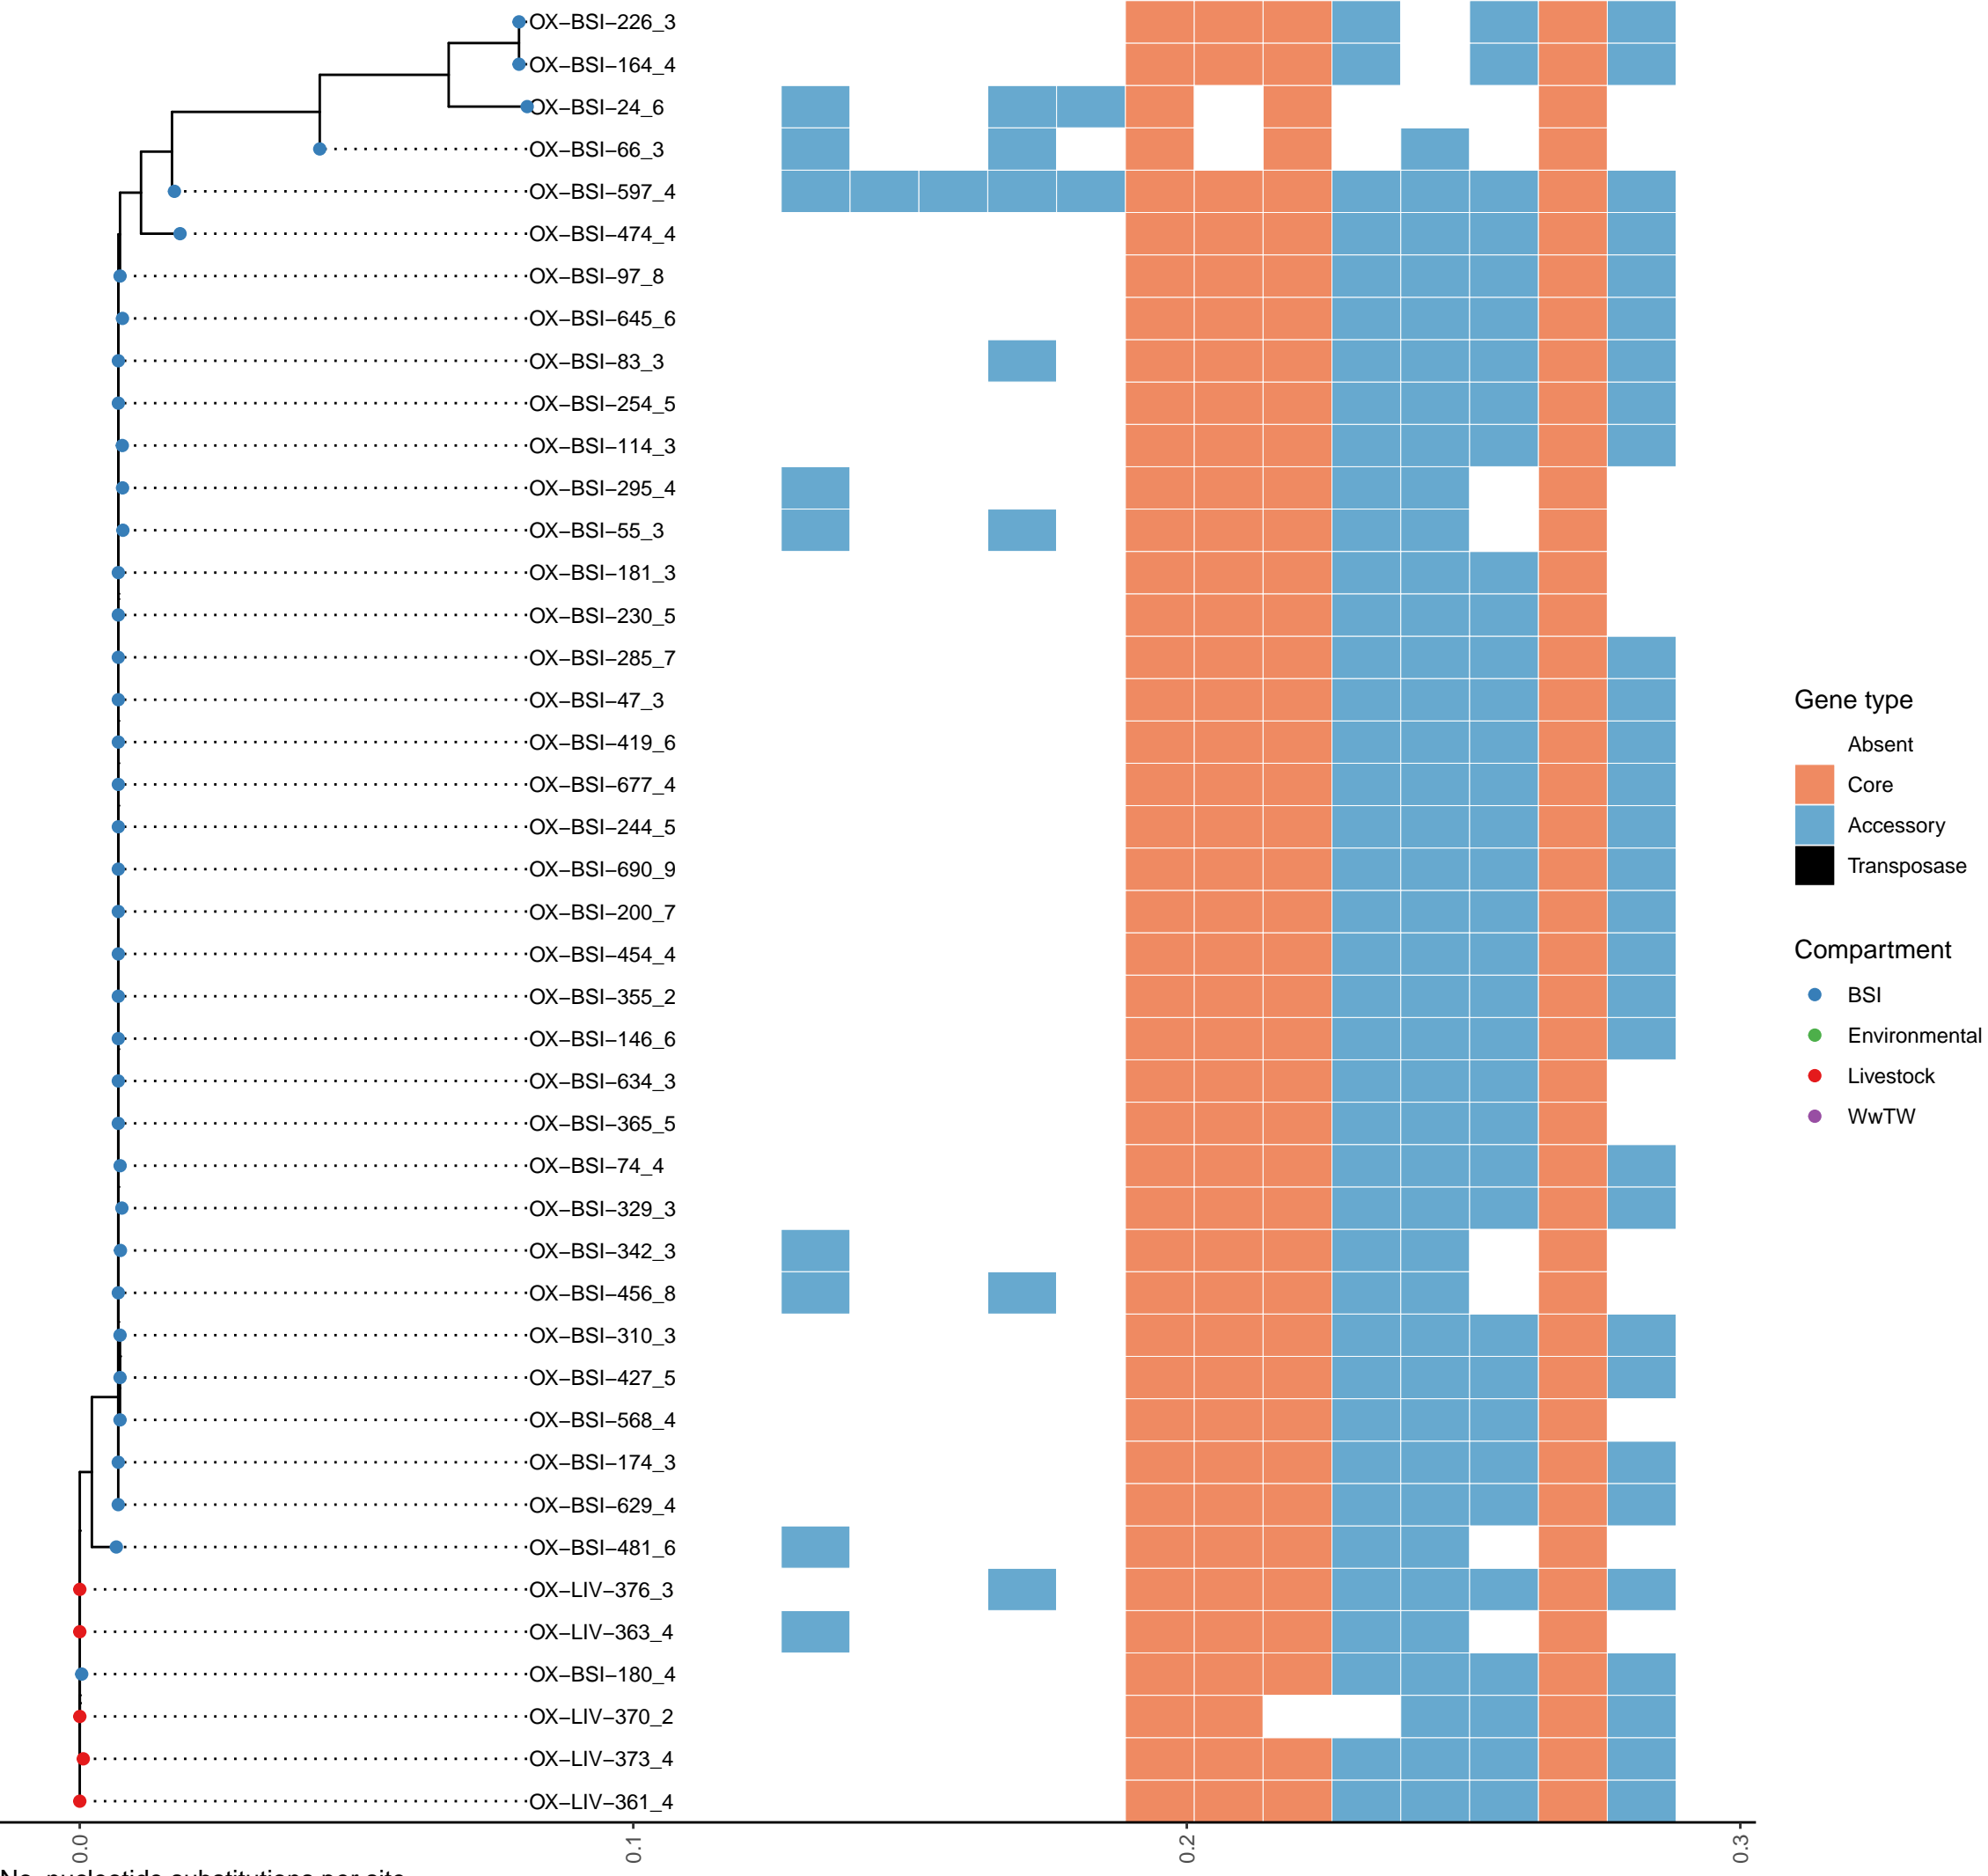

Cluster 12  
49 core genes  
198 accessory genes

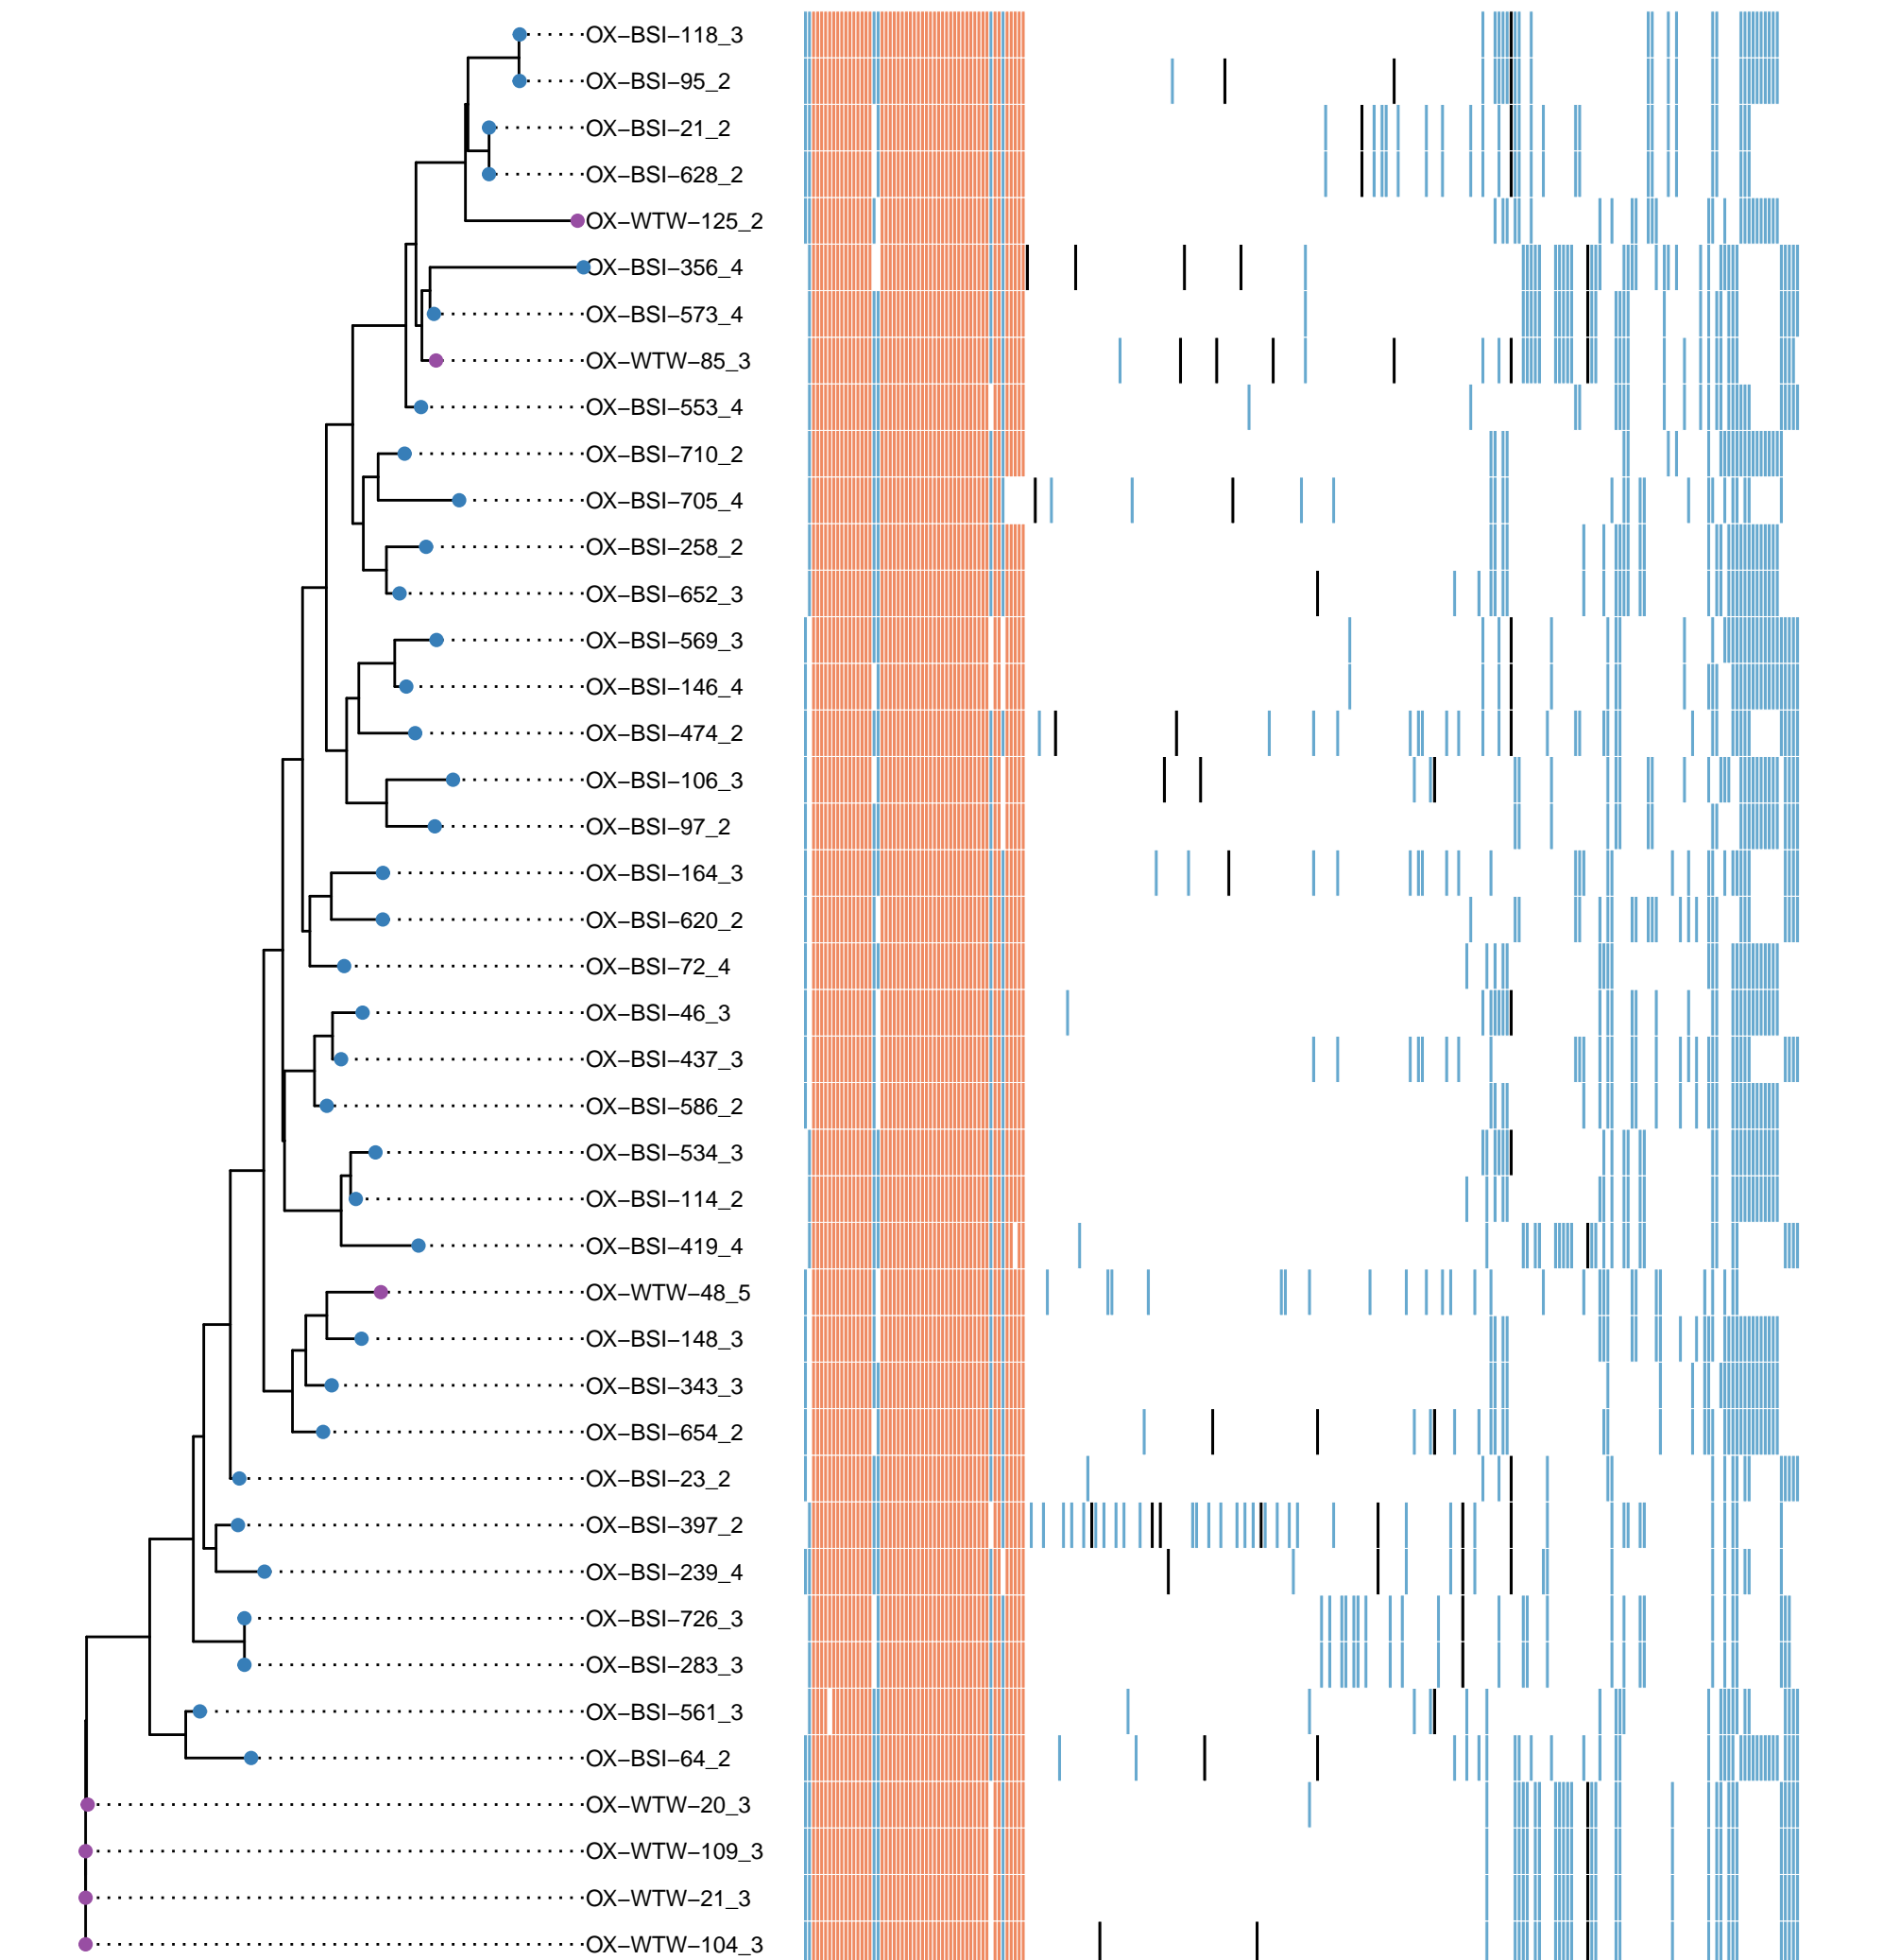

Gene type

- Absent
- Core
- Accessory
- Transposase

Compartment

- BSI
- Environmental
- Livestock
- WwTW

Cluster 13  
117 core genes  
86 accessory genes

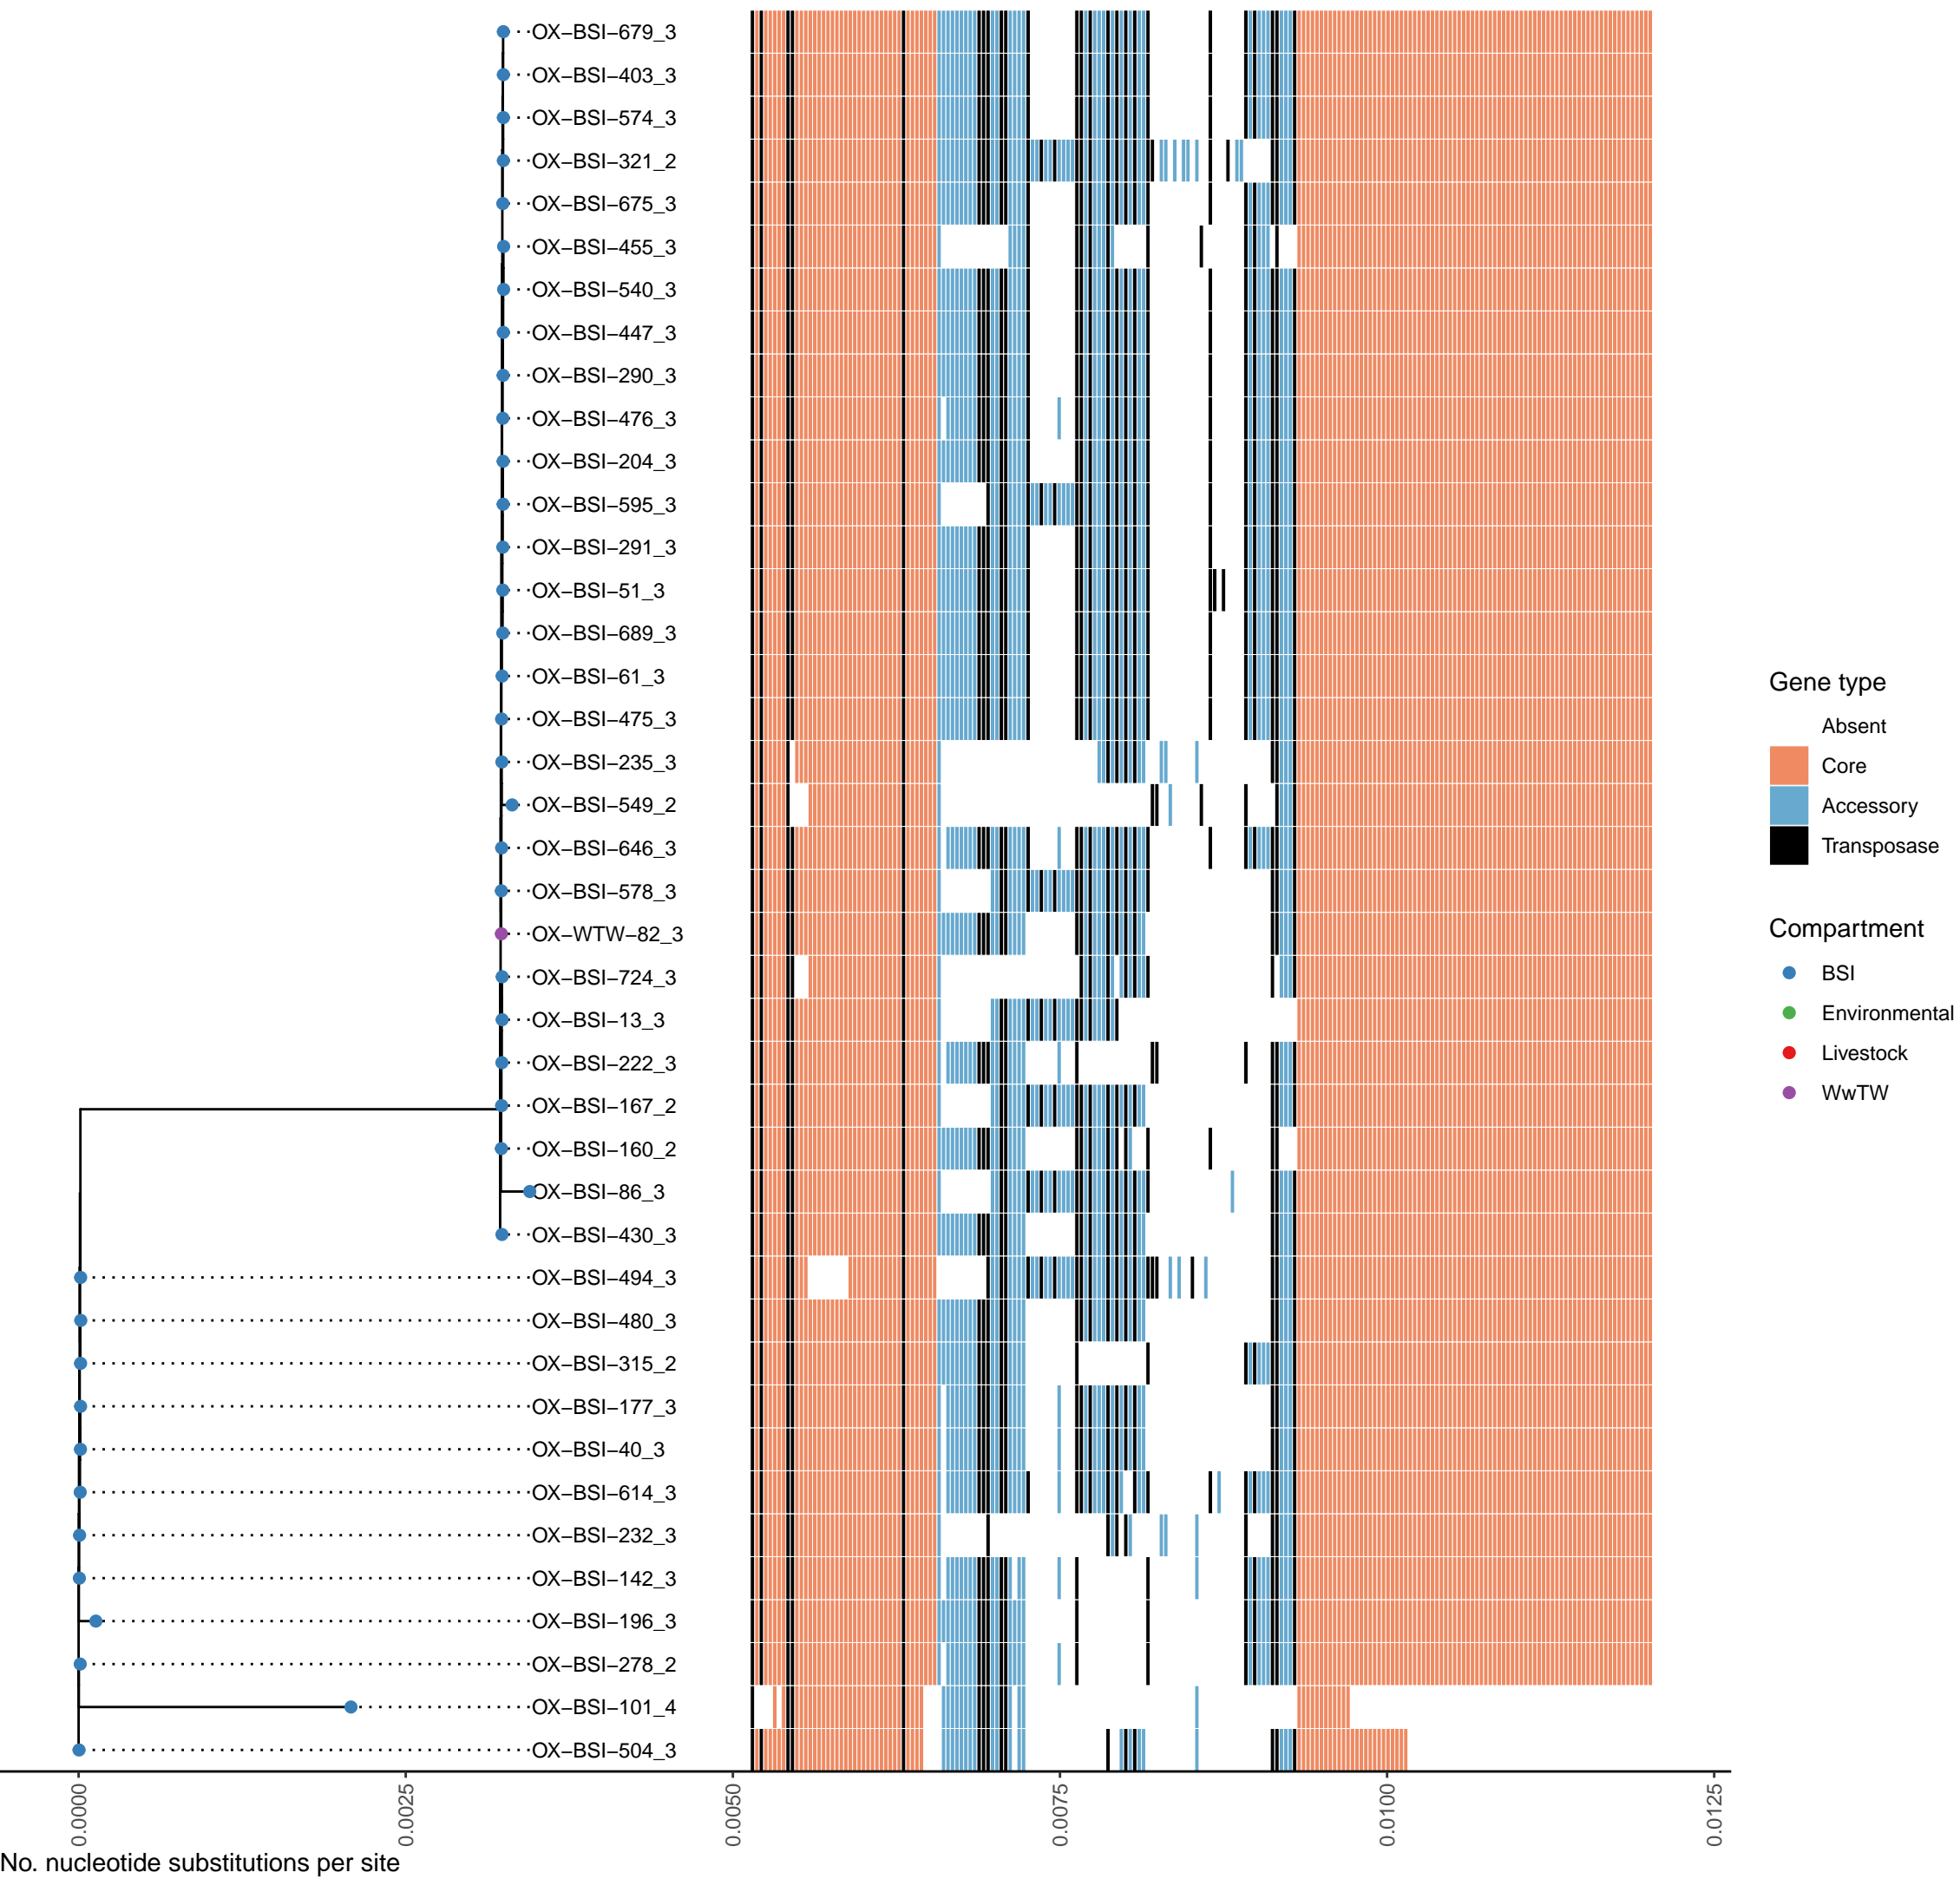

Cluster 14  
63 core genes  
234 accessory genes

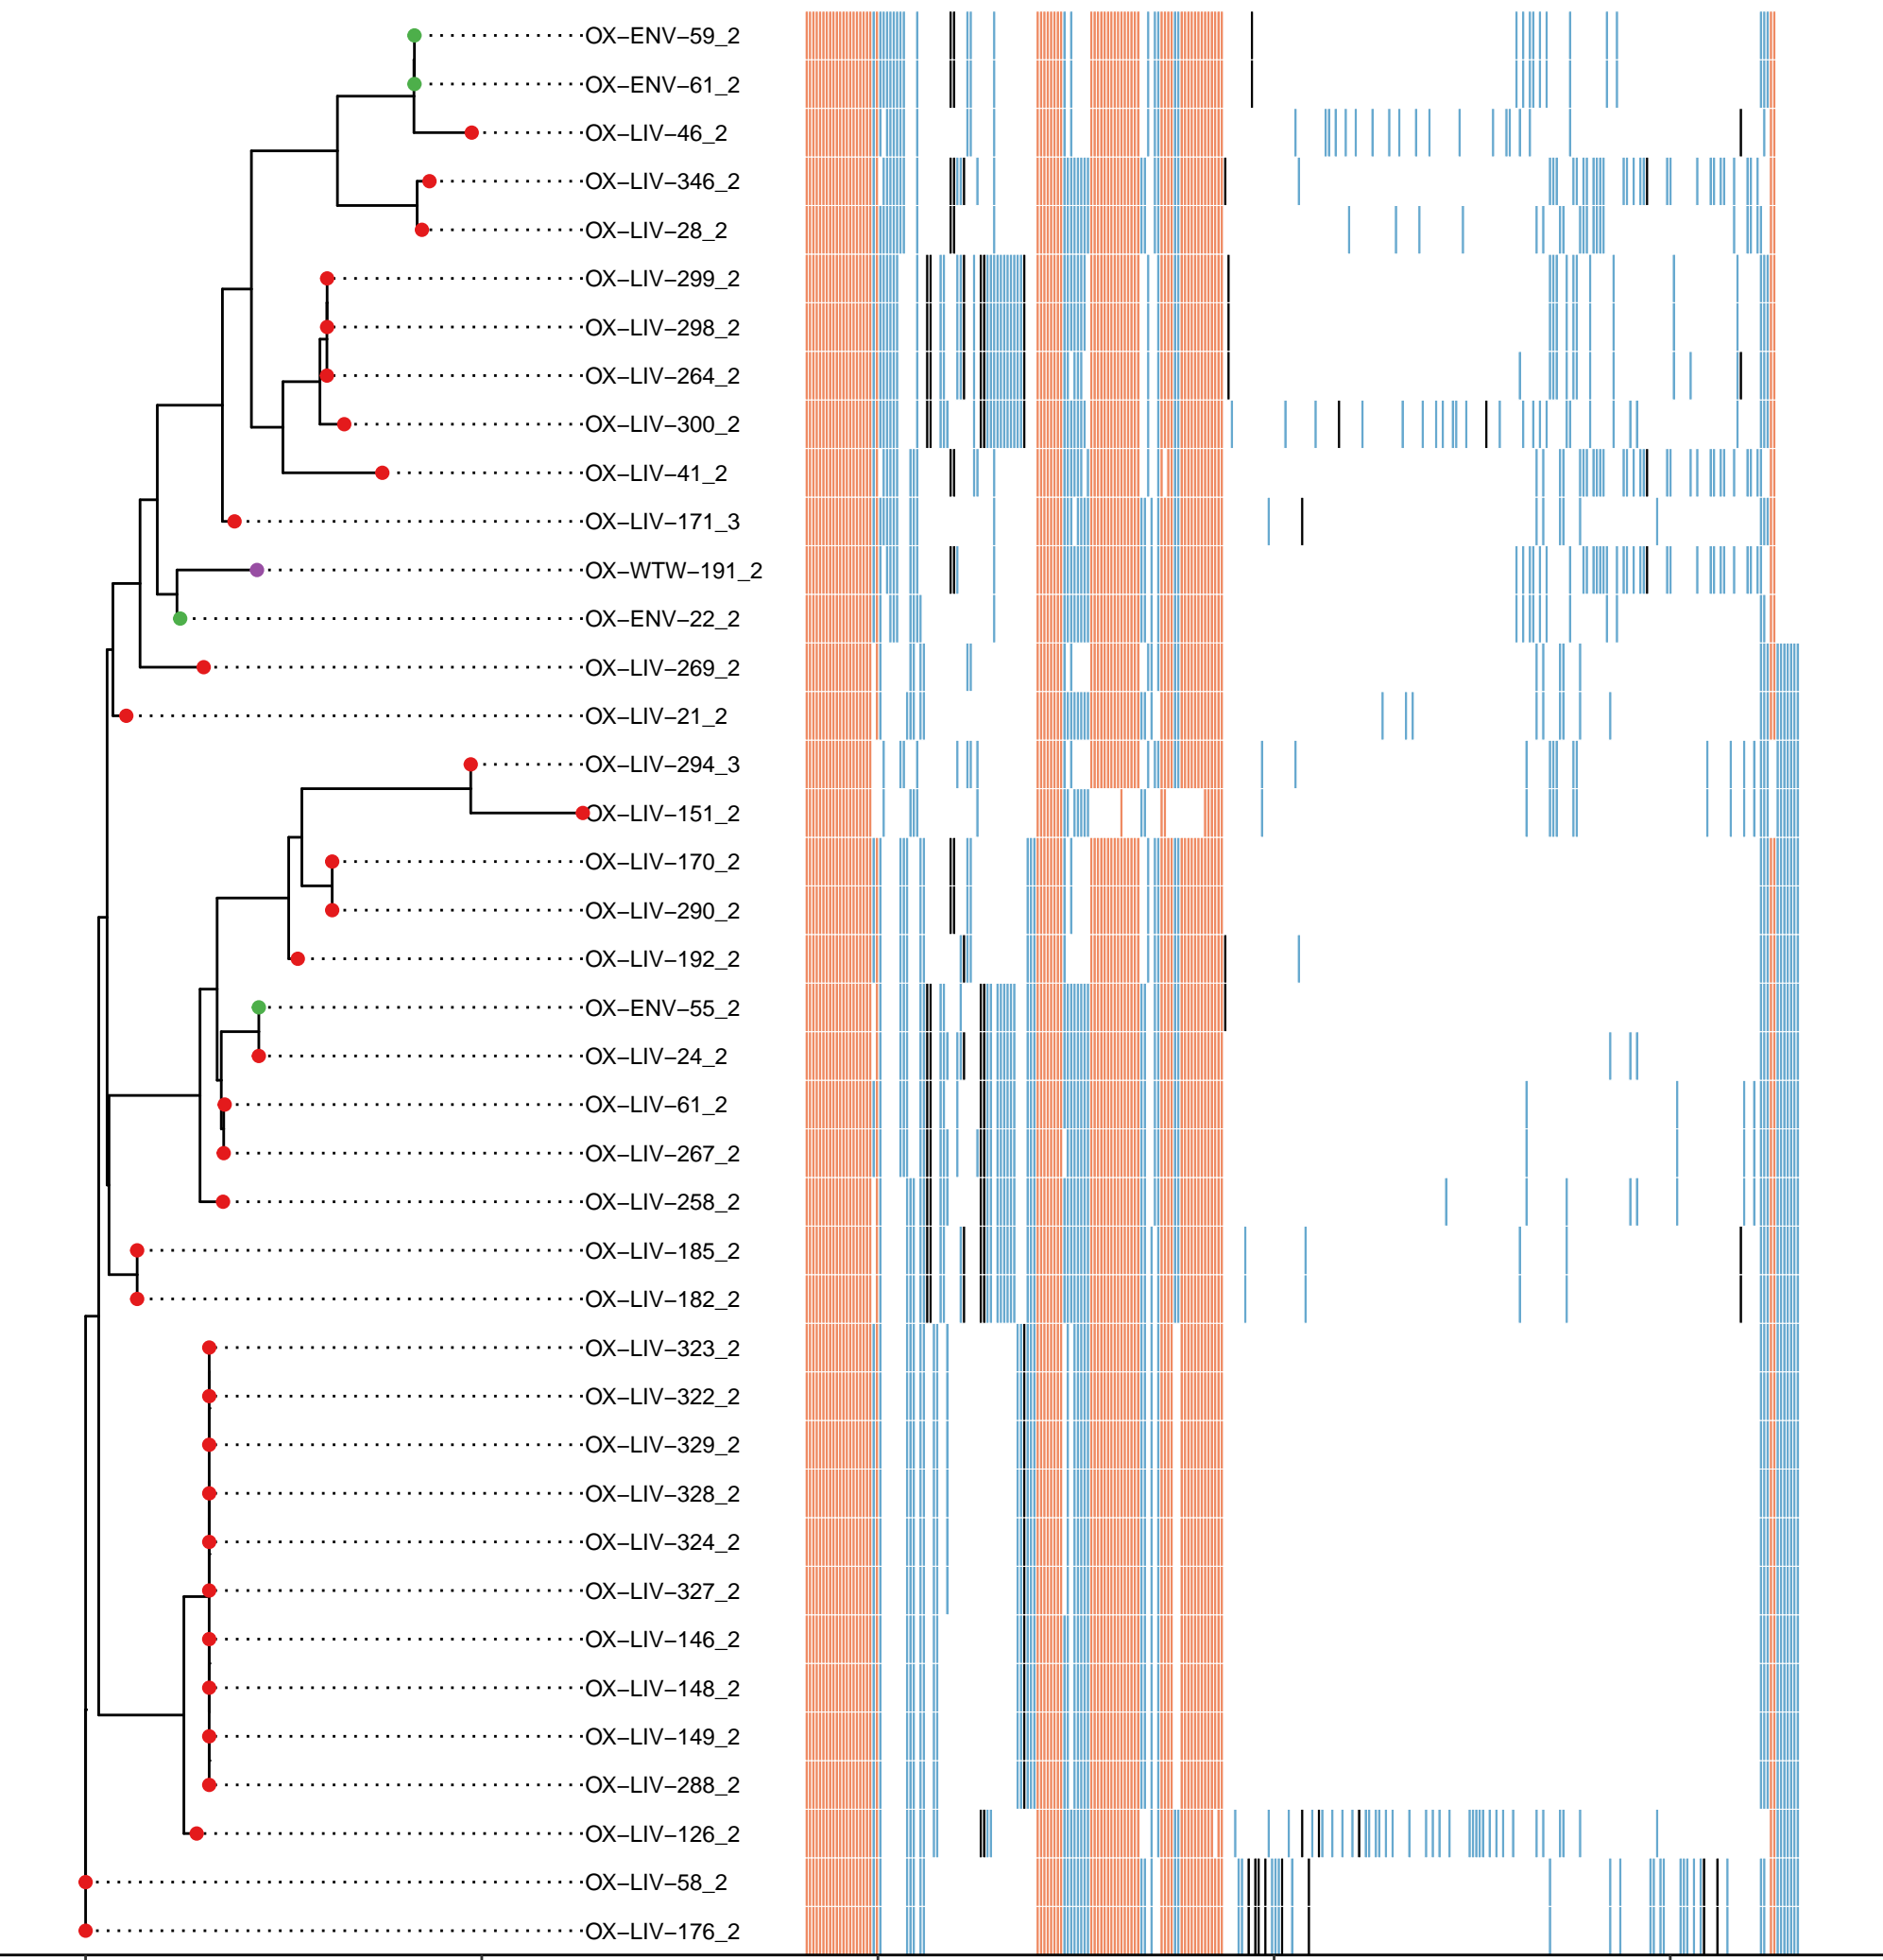

Gene type

- Absent
- Core
- Accessory
- Transposase

Compartment

- BSI
- Environmental
- Livestock
- WwTW

Cluster 15  
47 core genes  
293 accessory genes

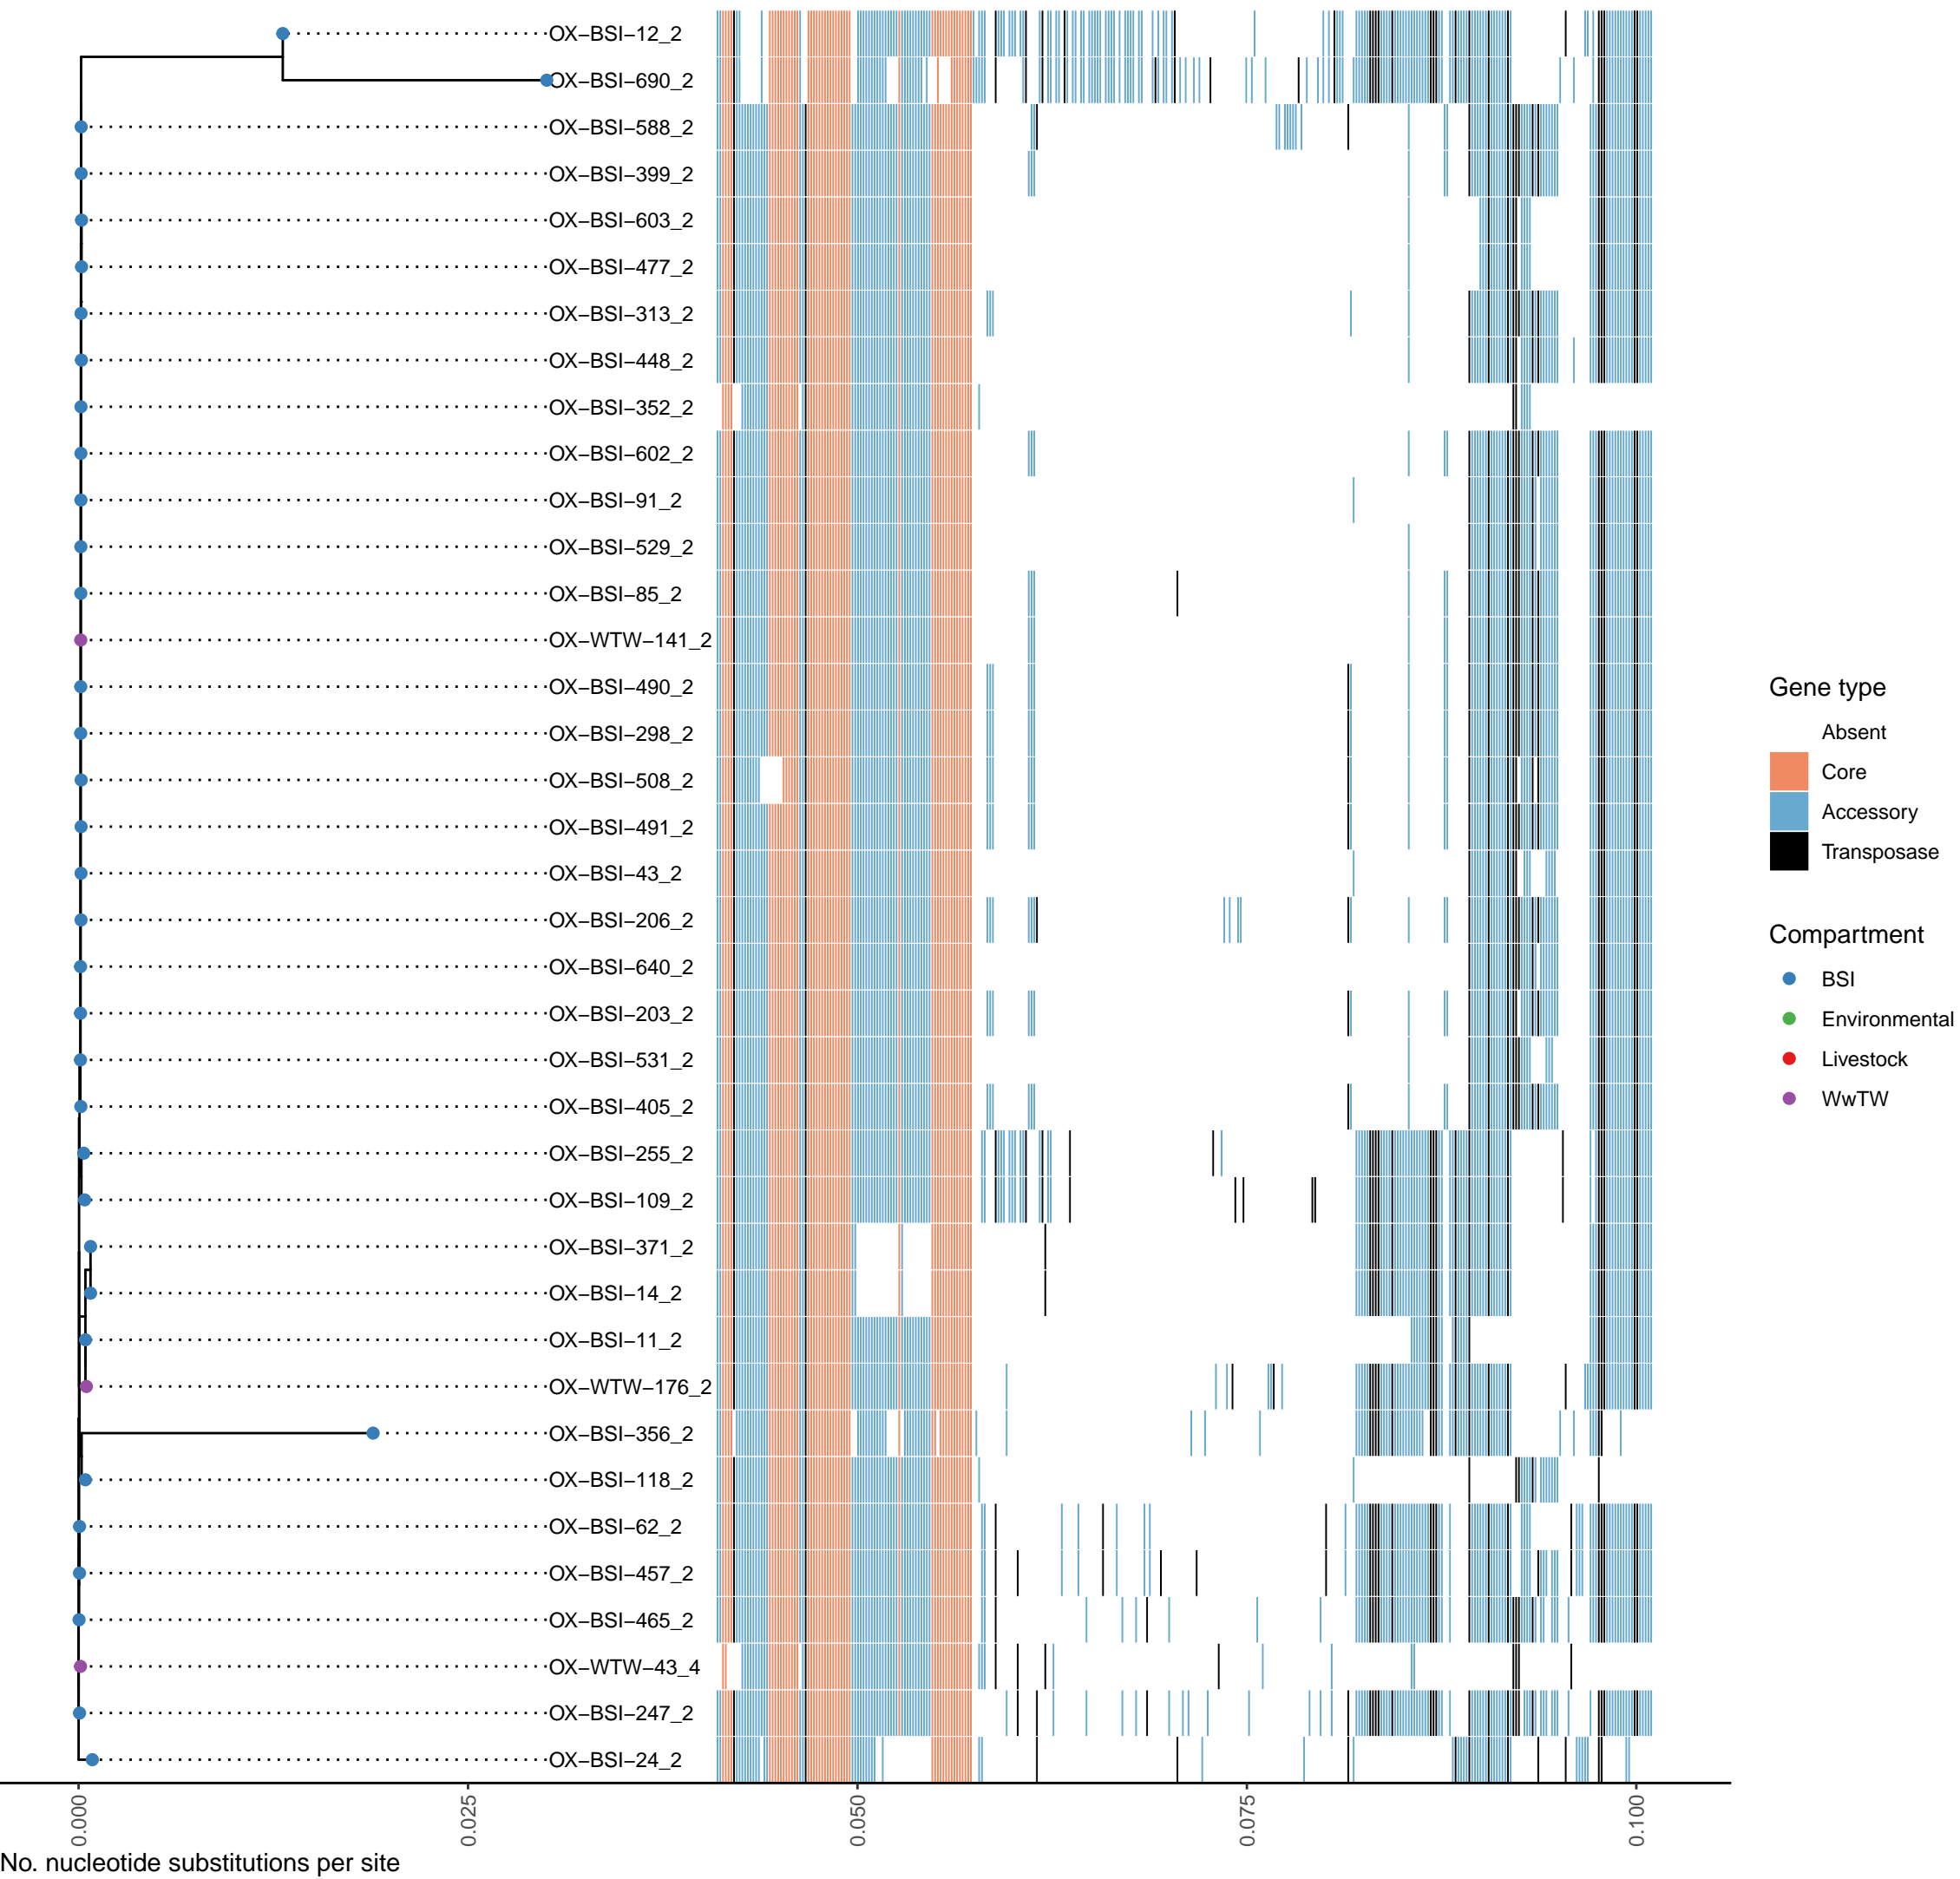

Cluster 16  
32 core genes  
801 accessory genes

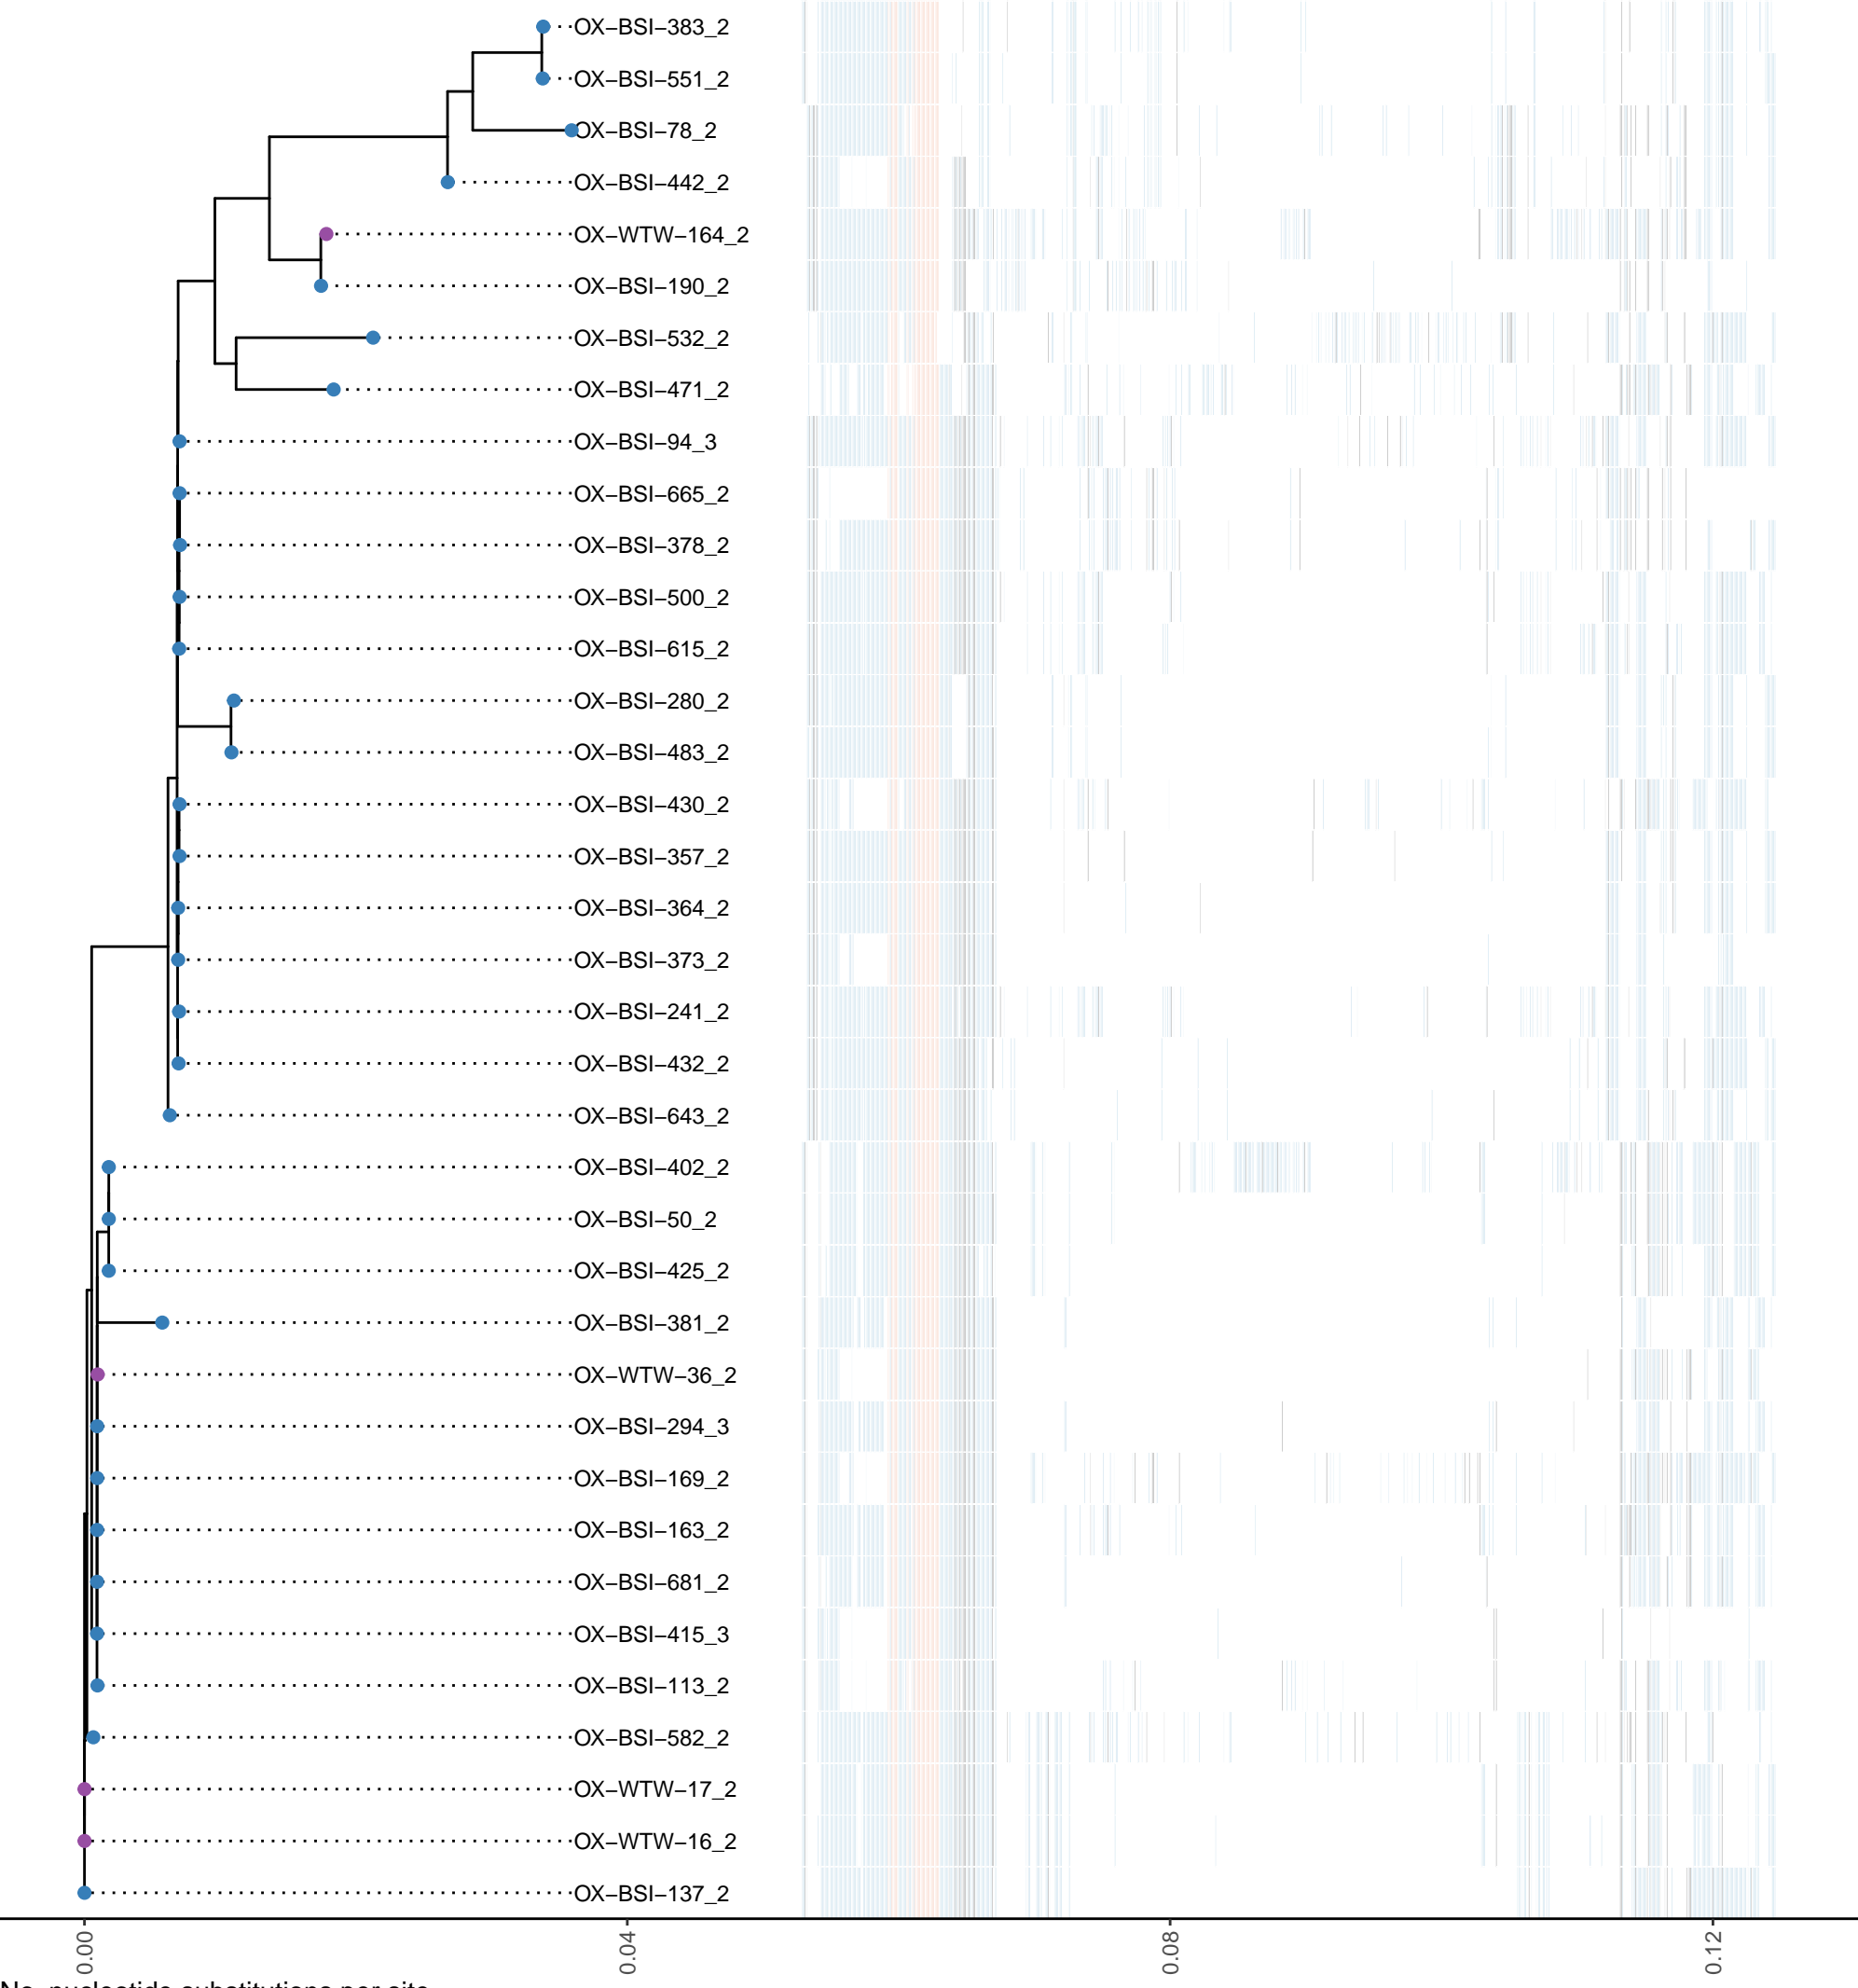

Cluster 17  
5 core genes  
12 accessory genes

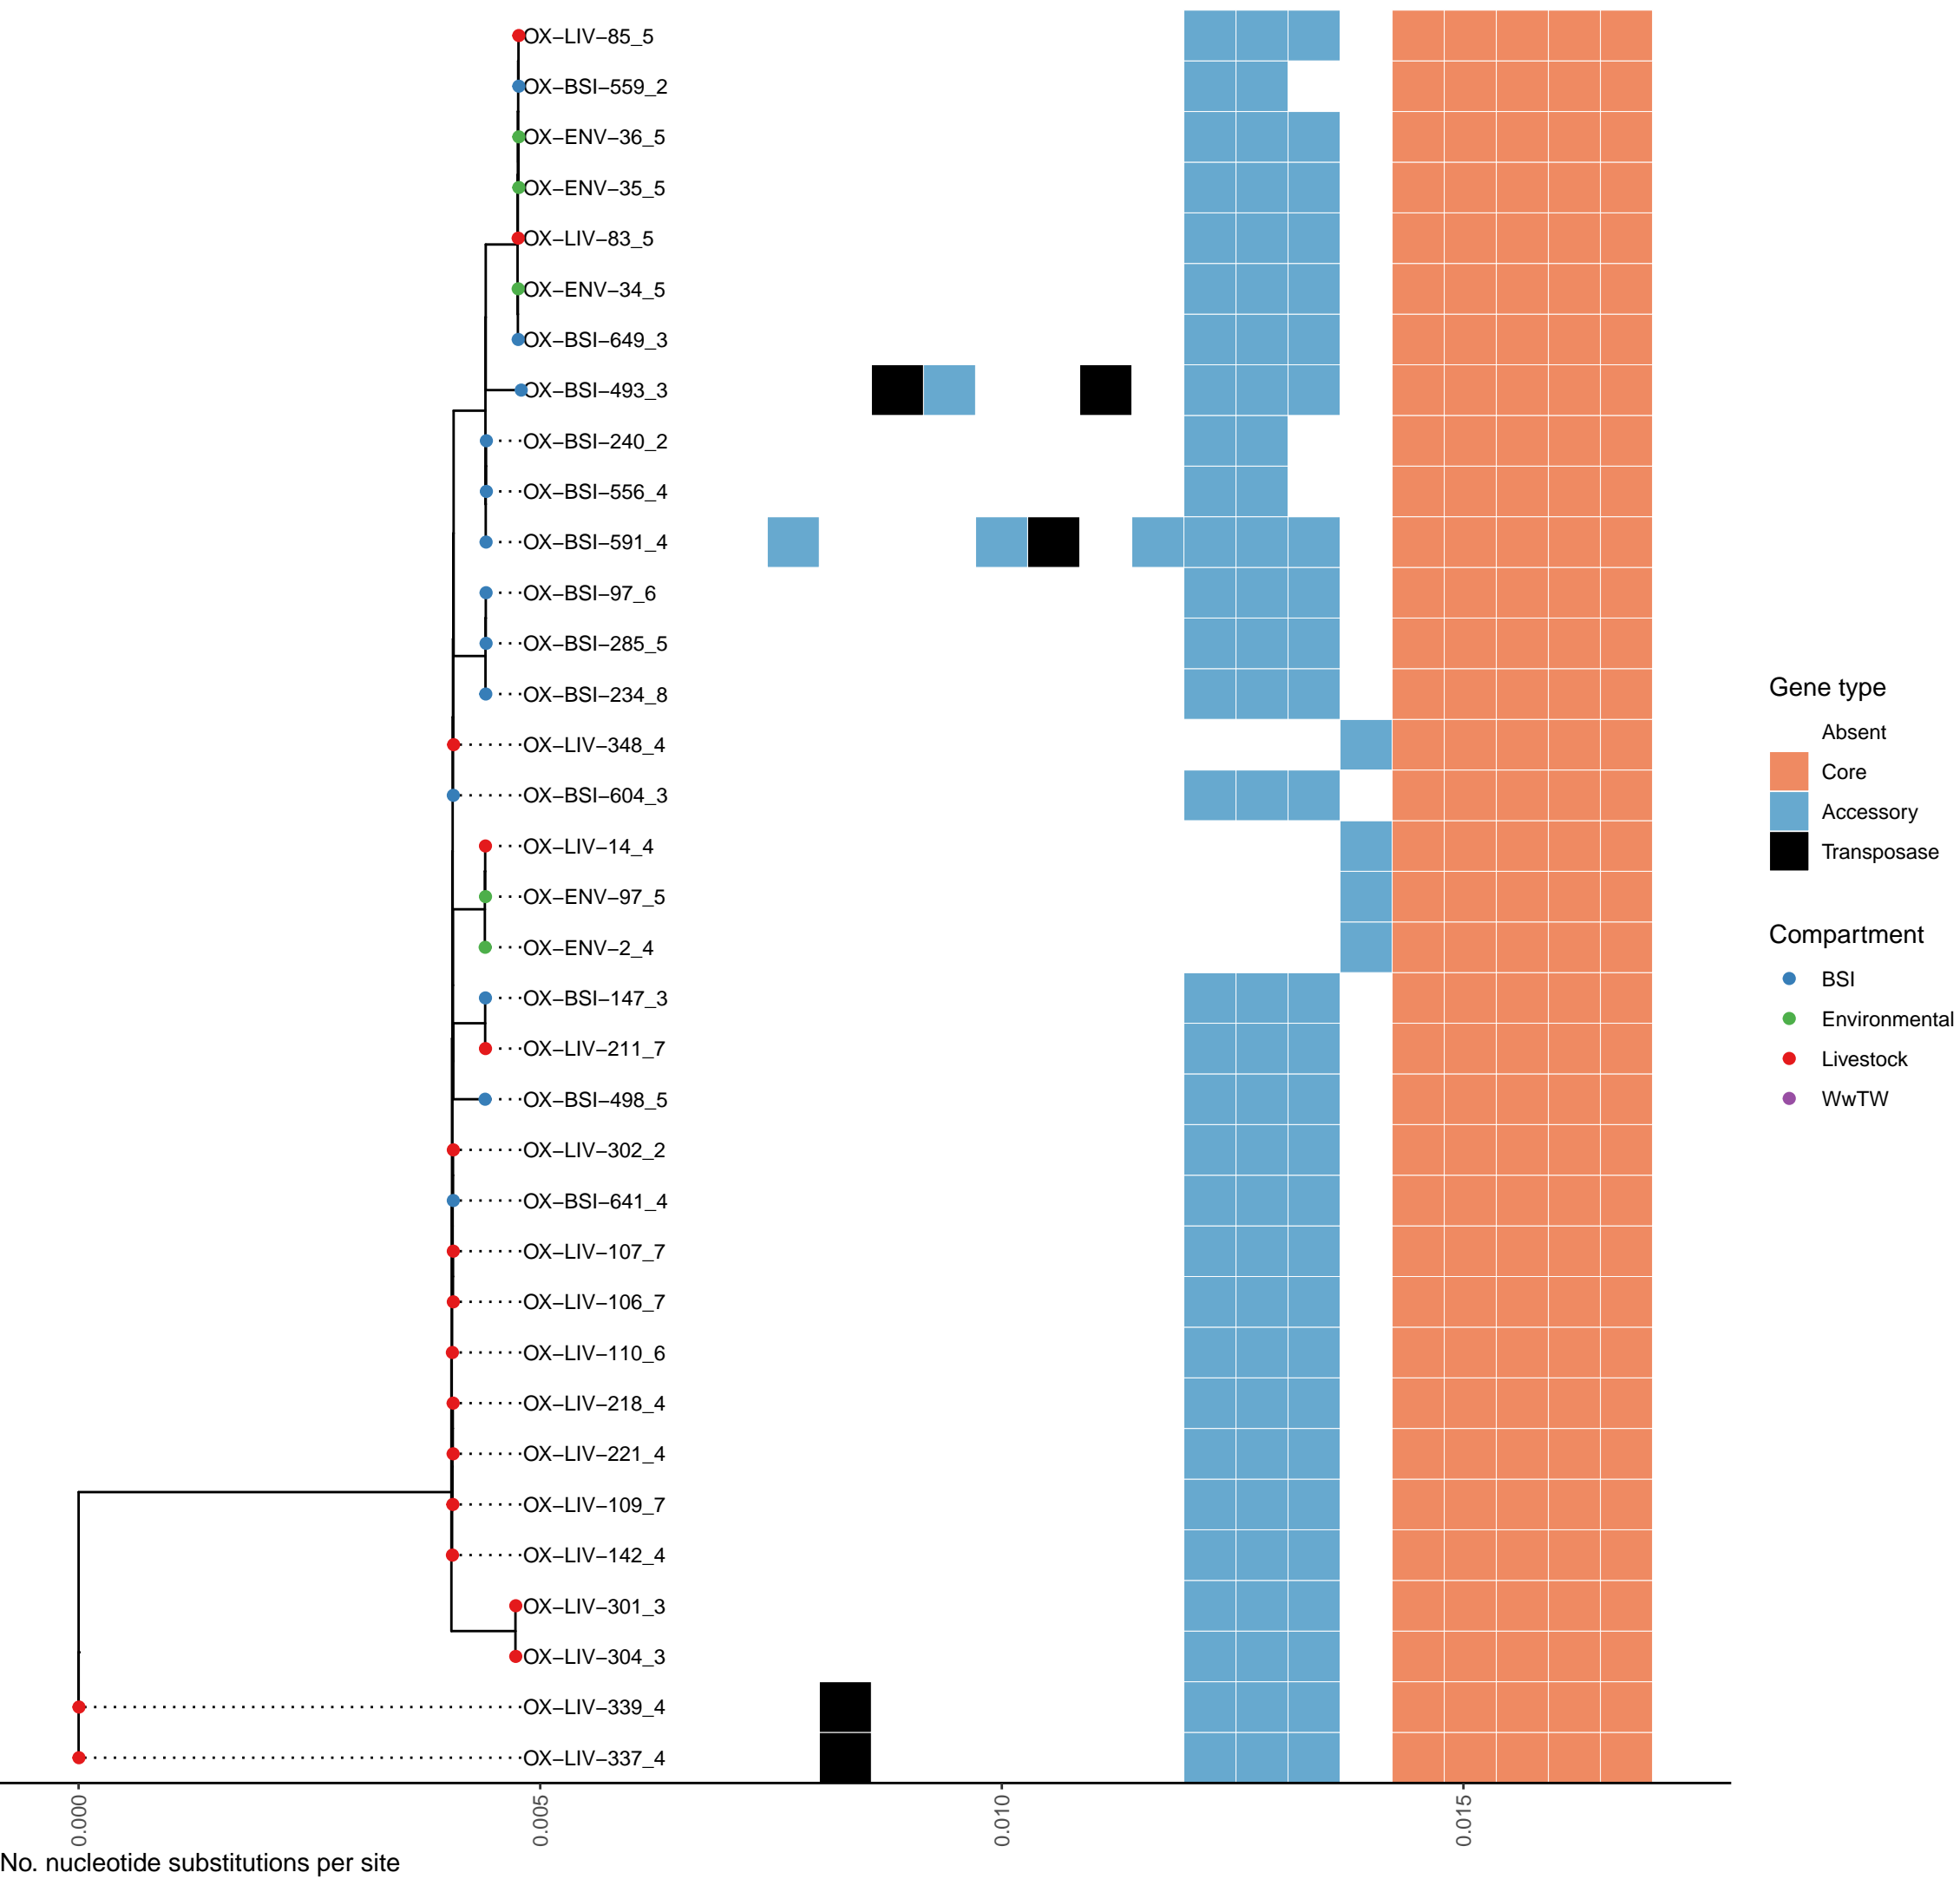

Cluster 18  
8 core genes  
8 accessory genes

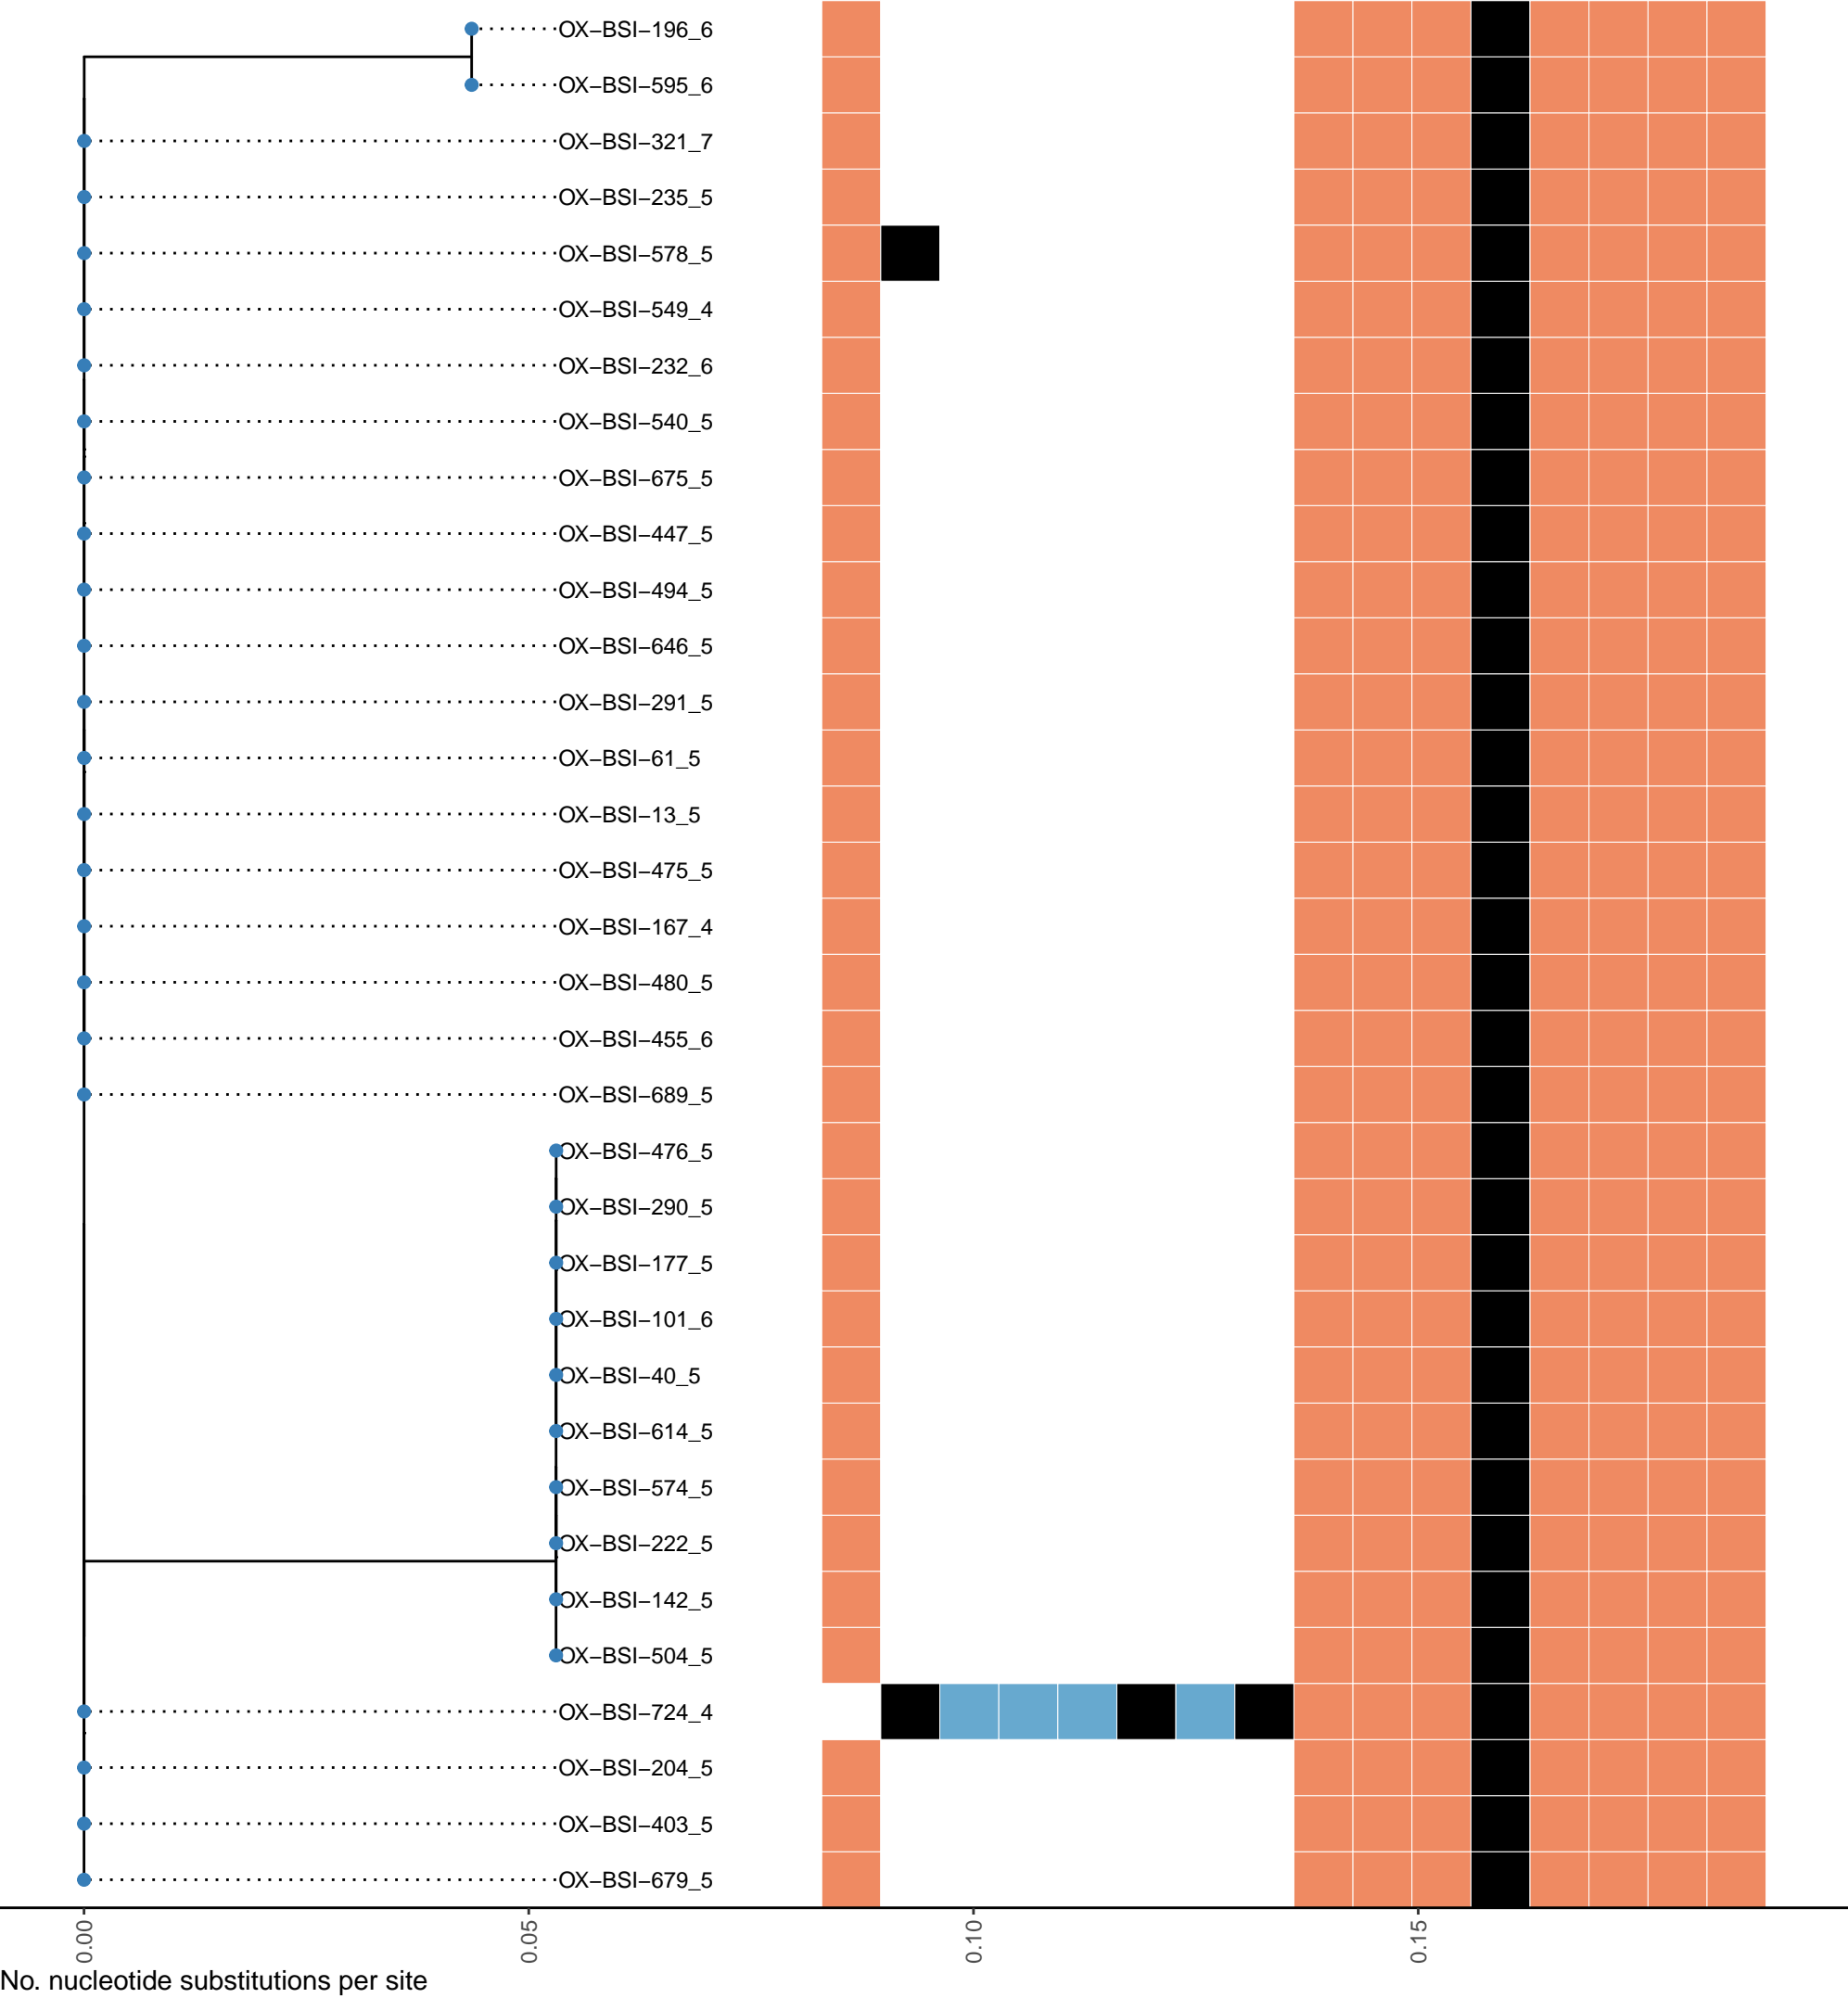

Gene type

- Absent
- Core
- Accessory
- Transposase

Compartment

- BSI
- Environmental
- Livestock
- WwTW

Cluster 19  
116 core genes  
173 accessory genes

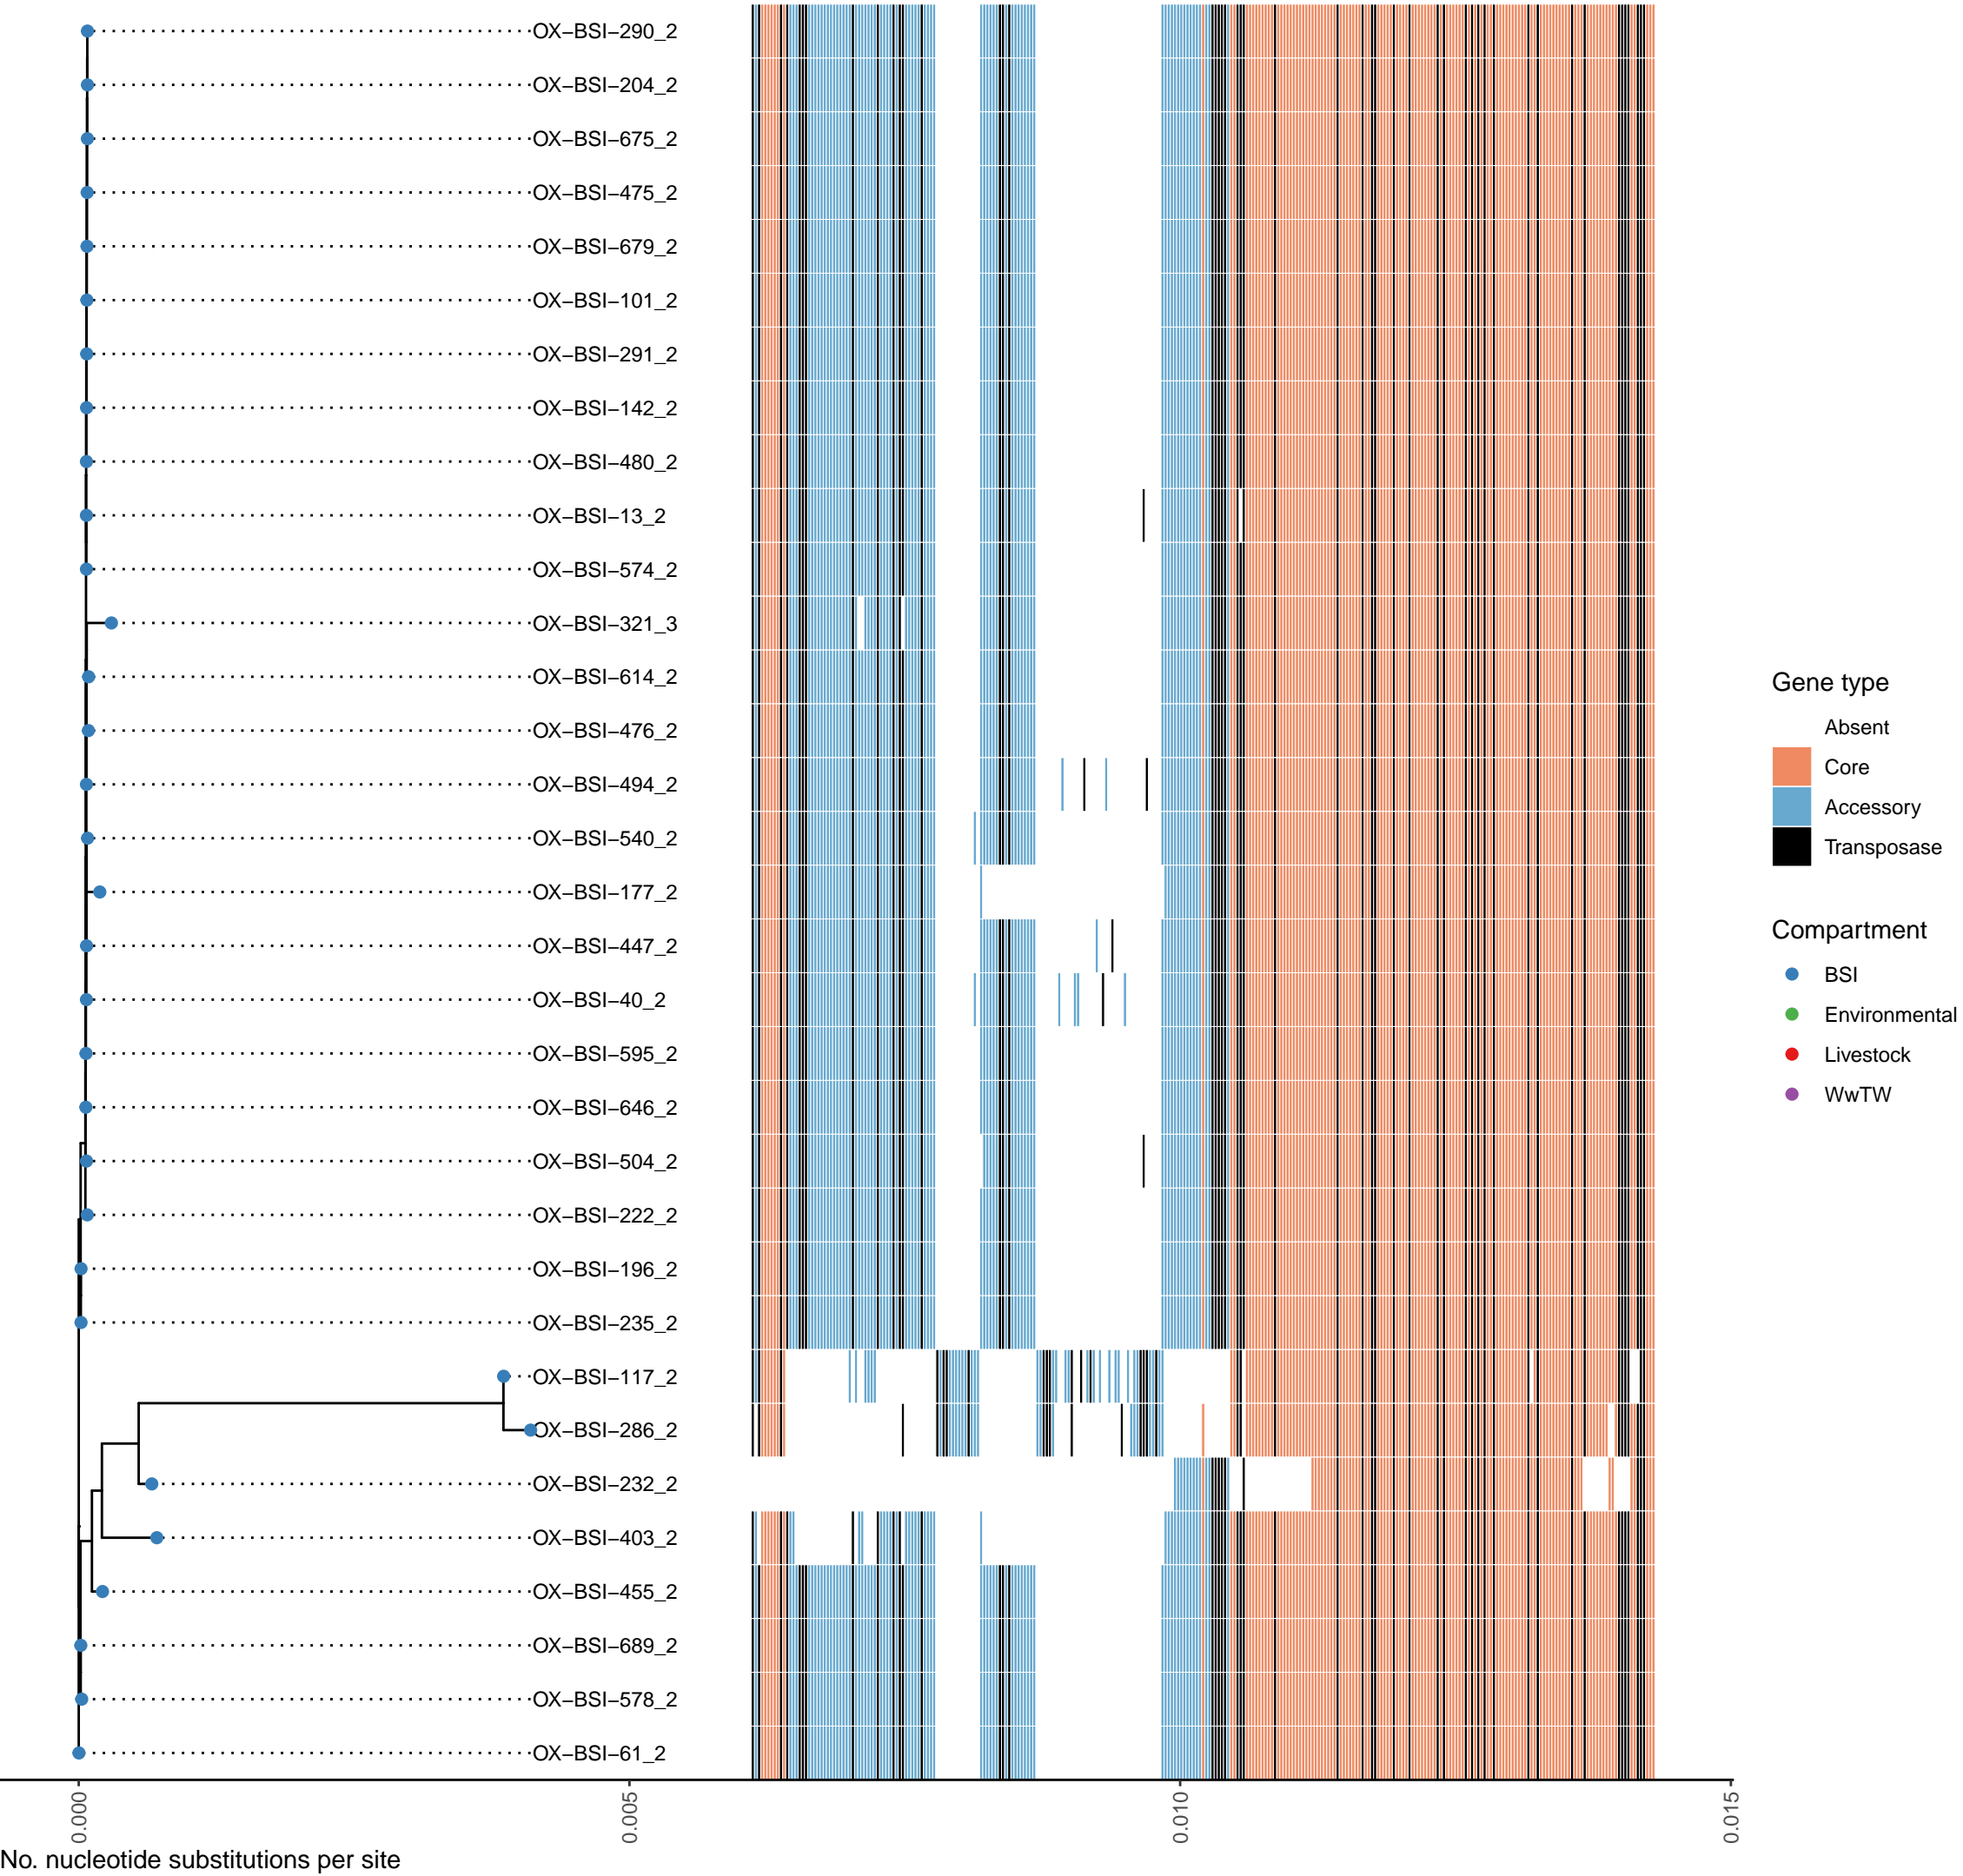

Cluster 20  
9 core genes  
10 accessory genes

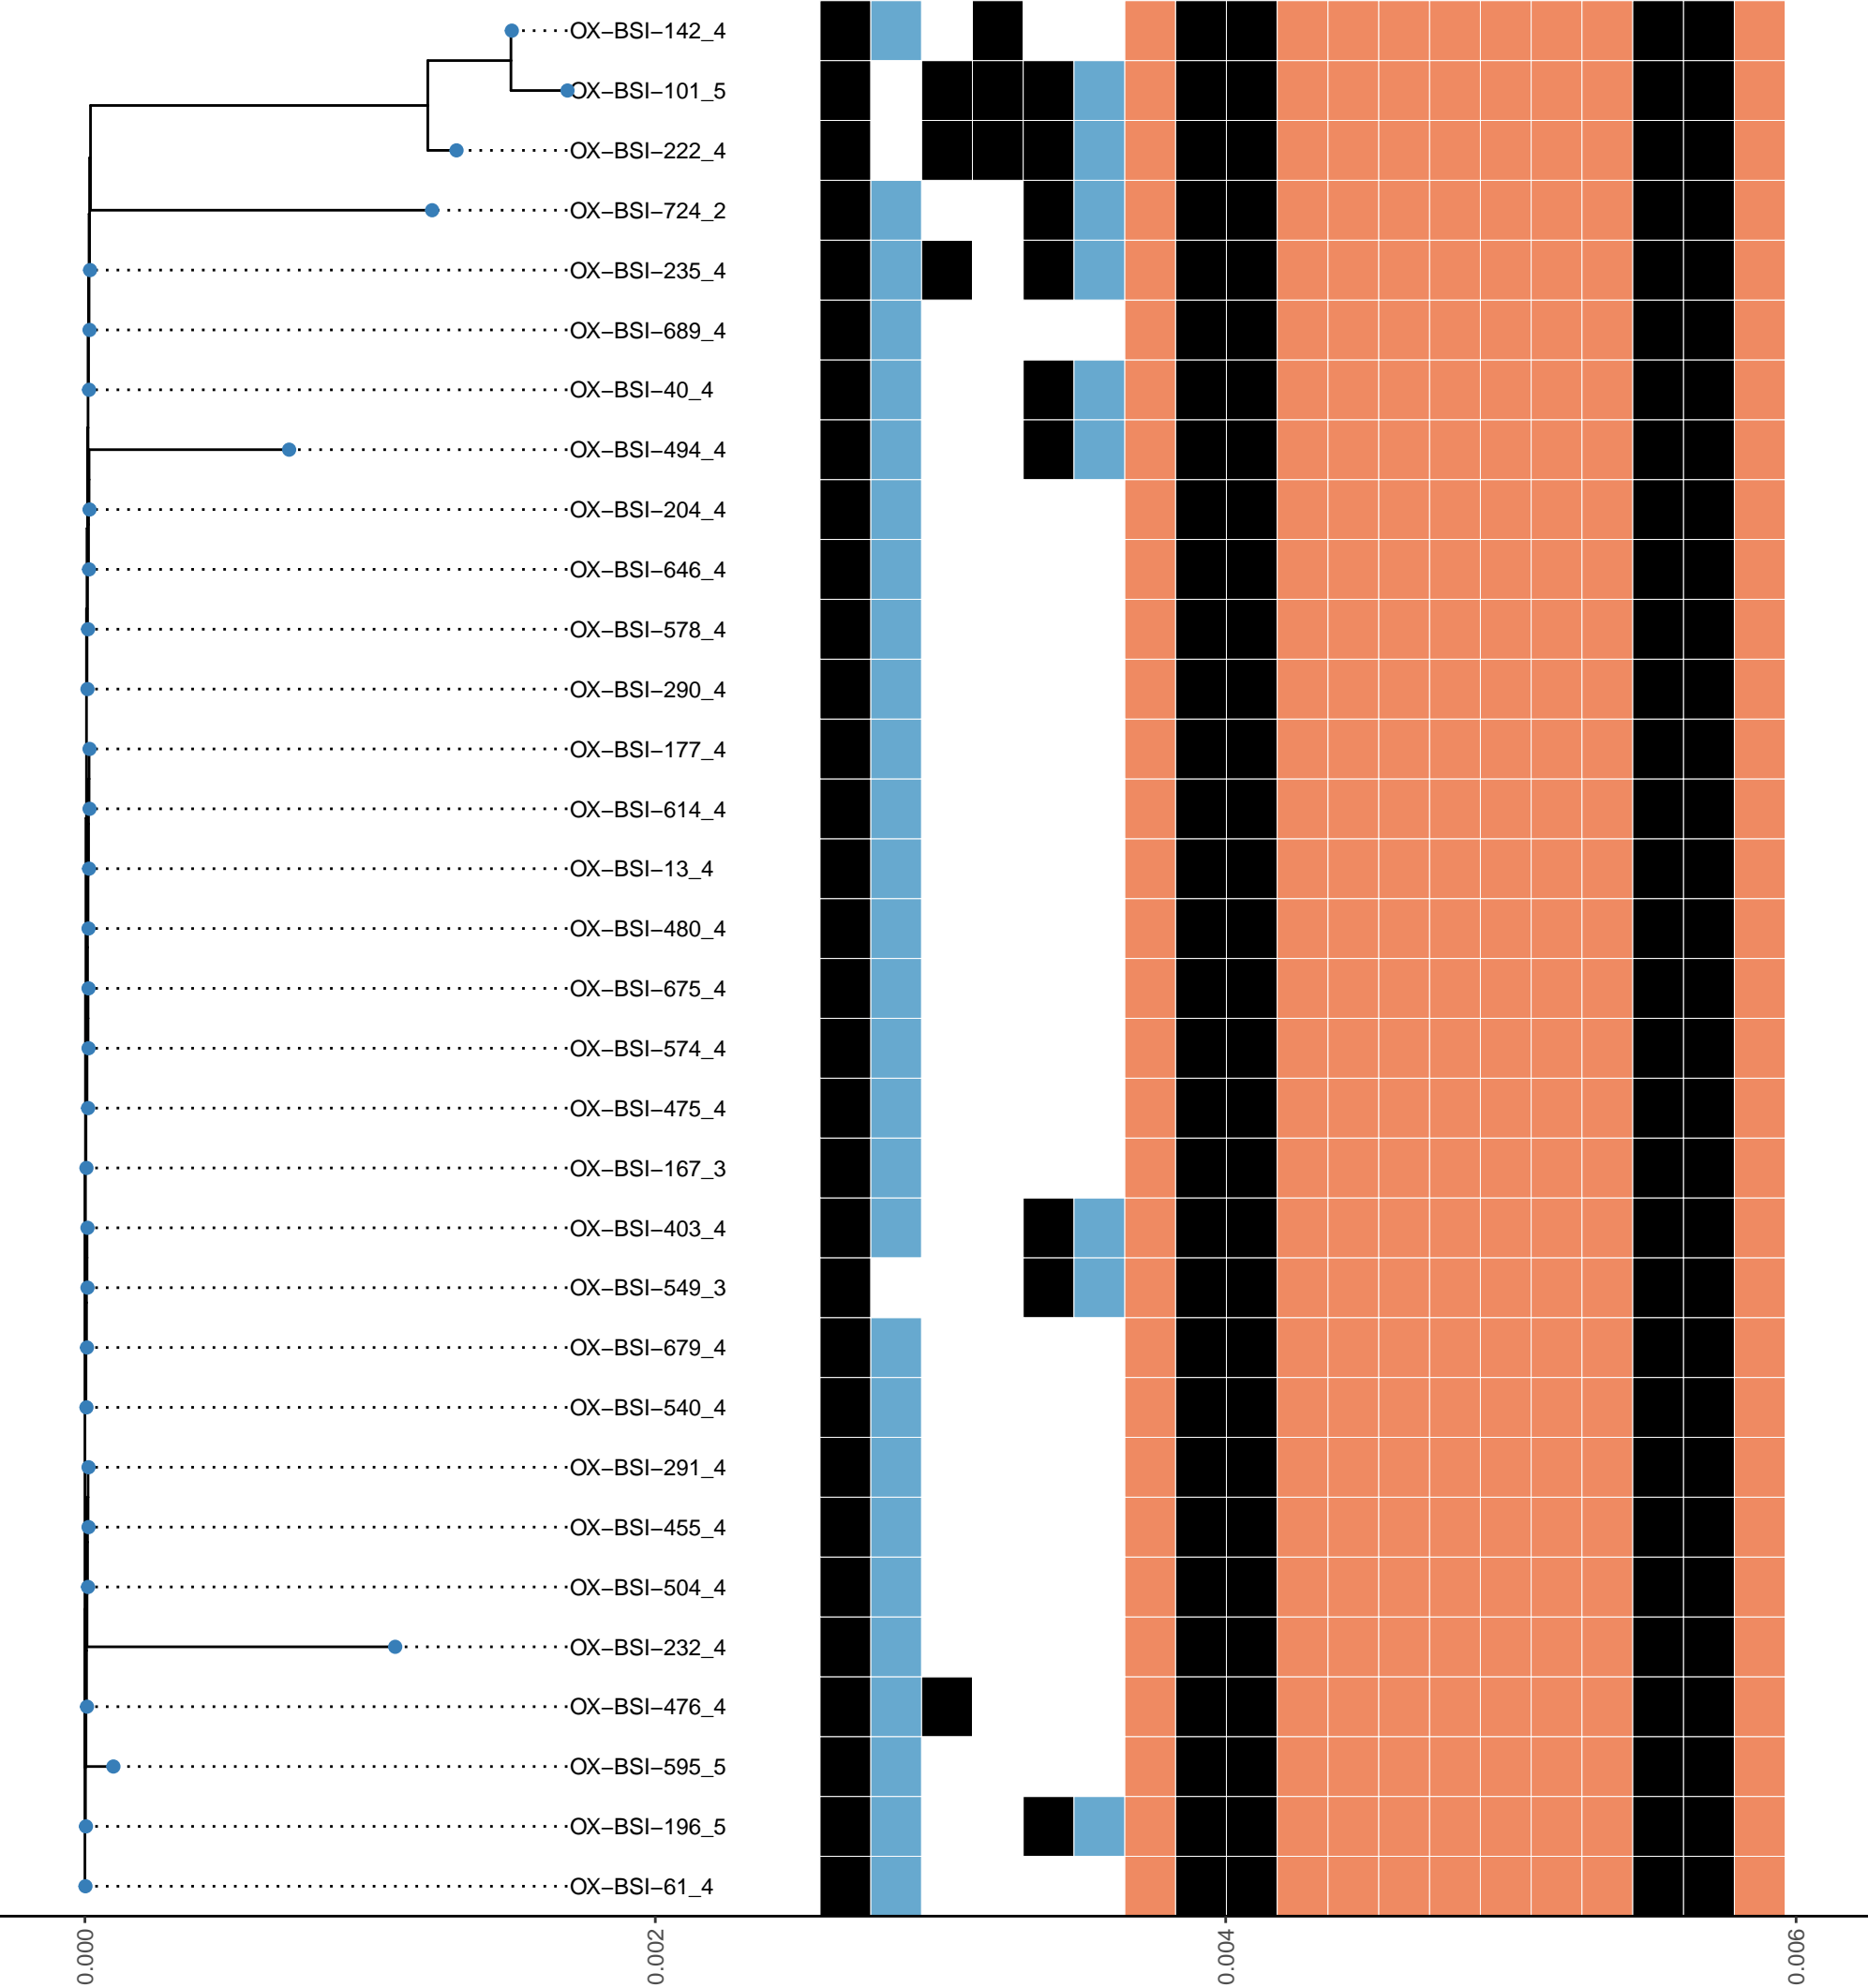

Gene type

- Absent
- Core
- Accessory
- Transposase

Compartment

- BSI
- Environmental
- Livestock
- WwTW

No. nucleotide substitutions per site

Cluster 21  
3 core genes  
3 accessory genes

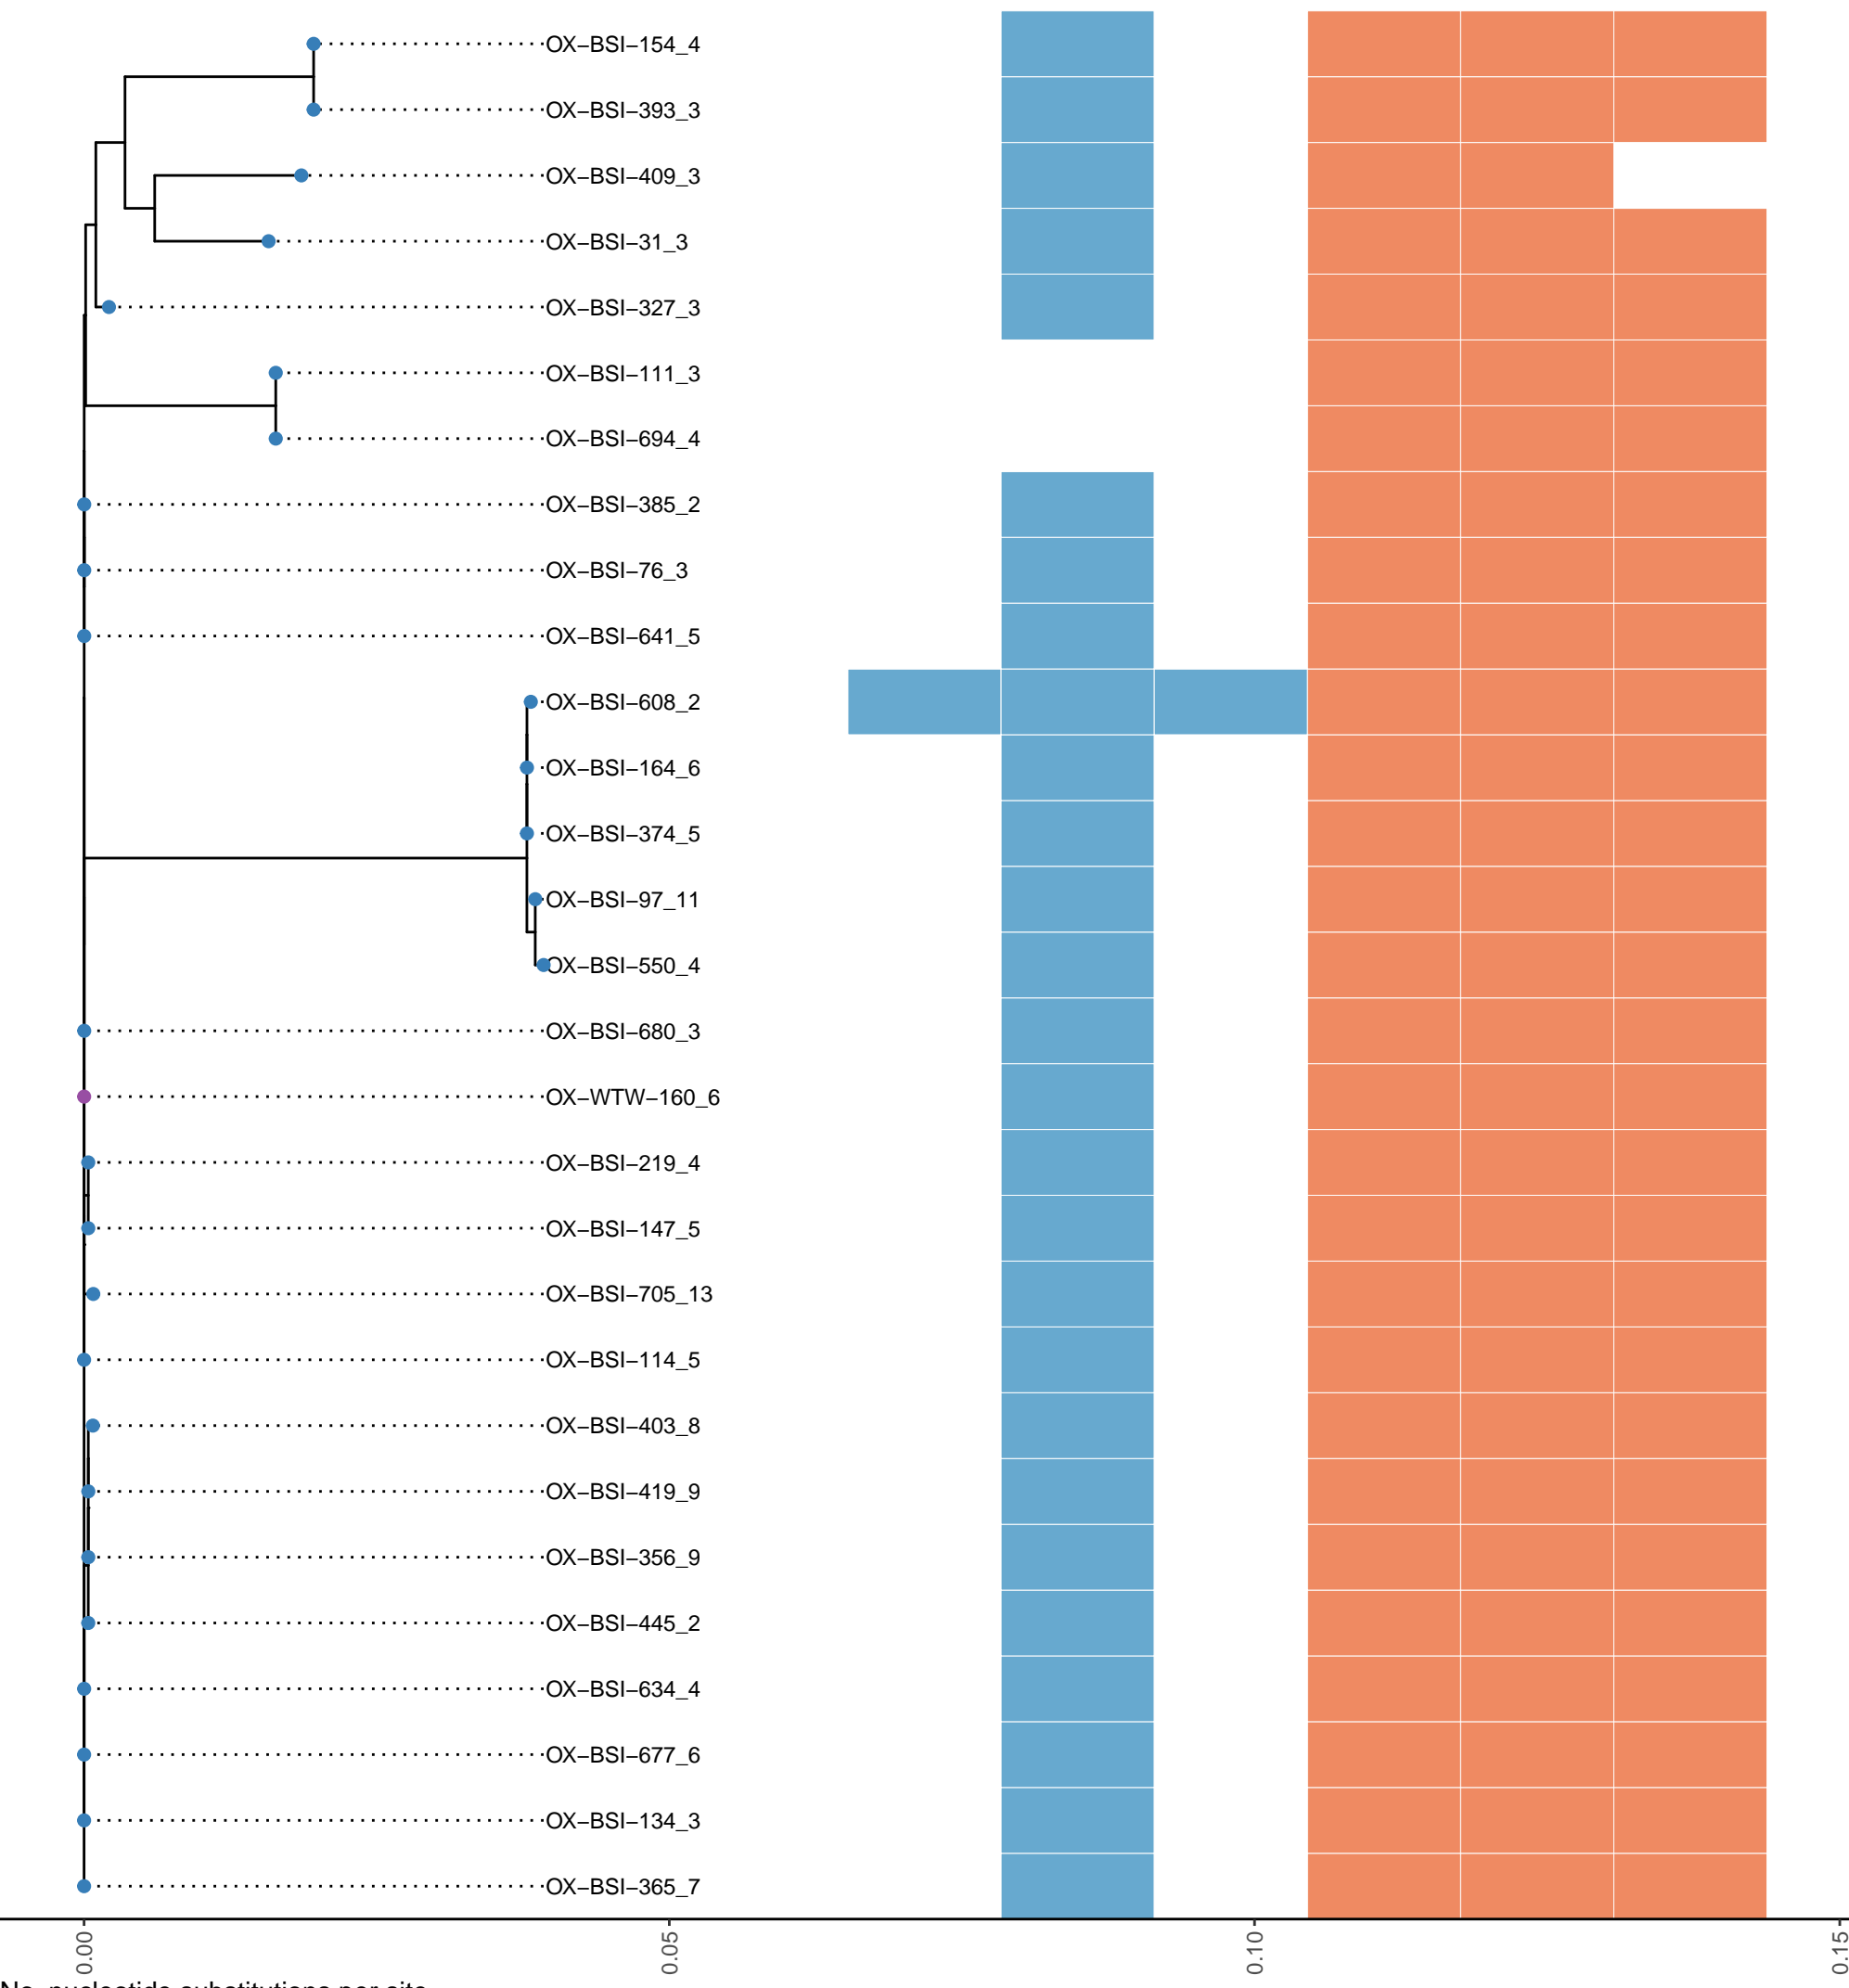

Gene type

- Absent
- Core
- Accessory
- Transposase

Compartment

- BSI
- Environmental
- Livestock
- WwTW

Cluster 22  
2 core genes  
0 accessory genes

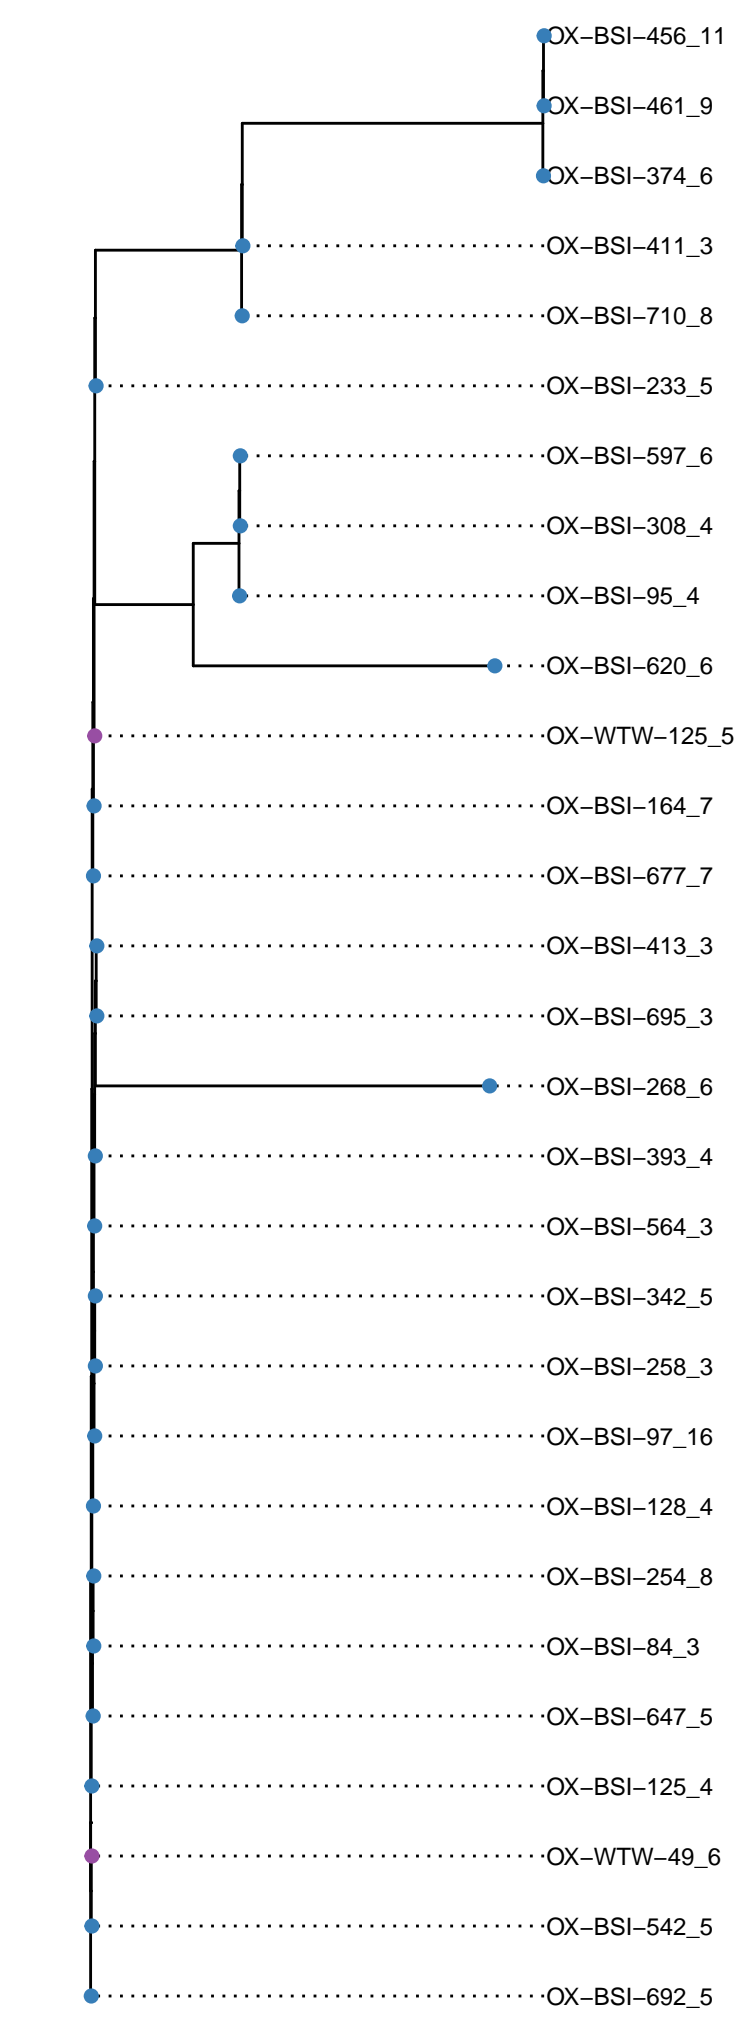

No. nucleotide substitutions per site

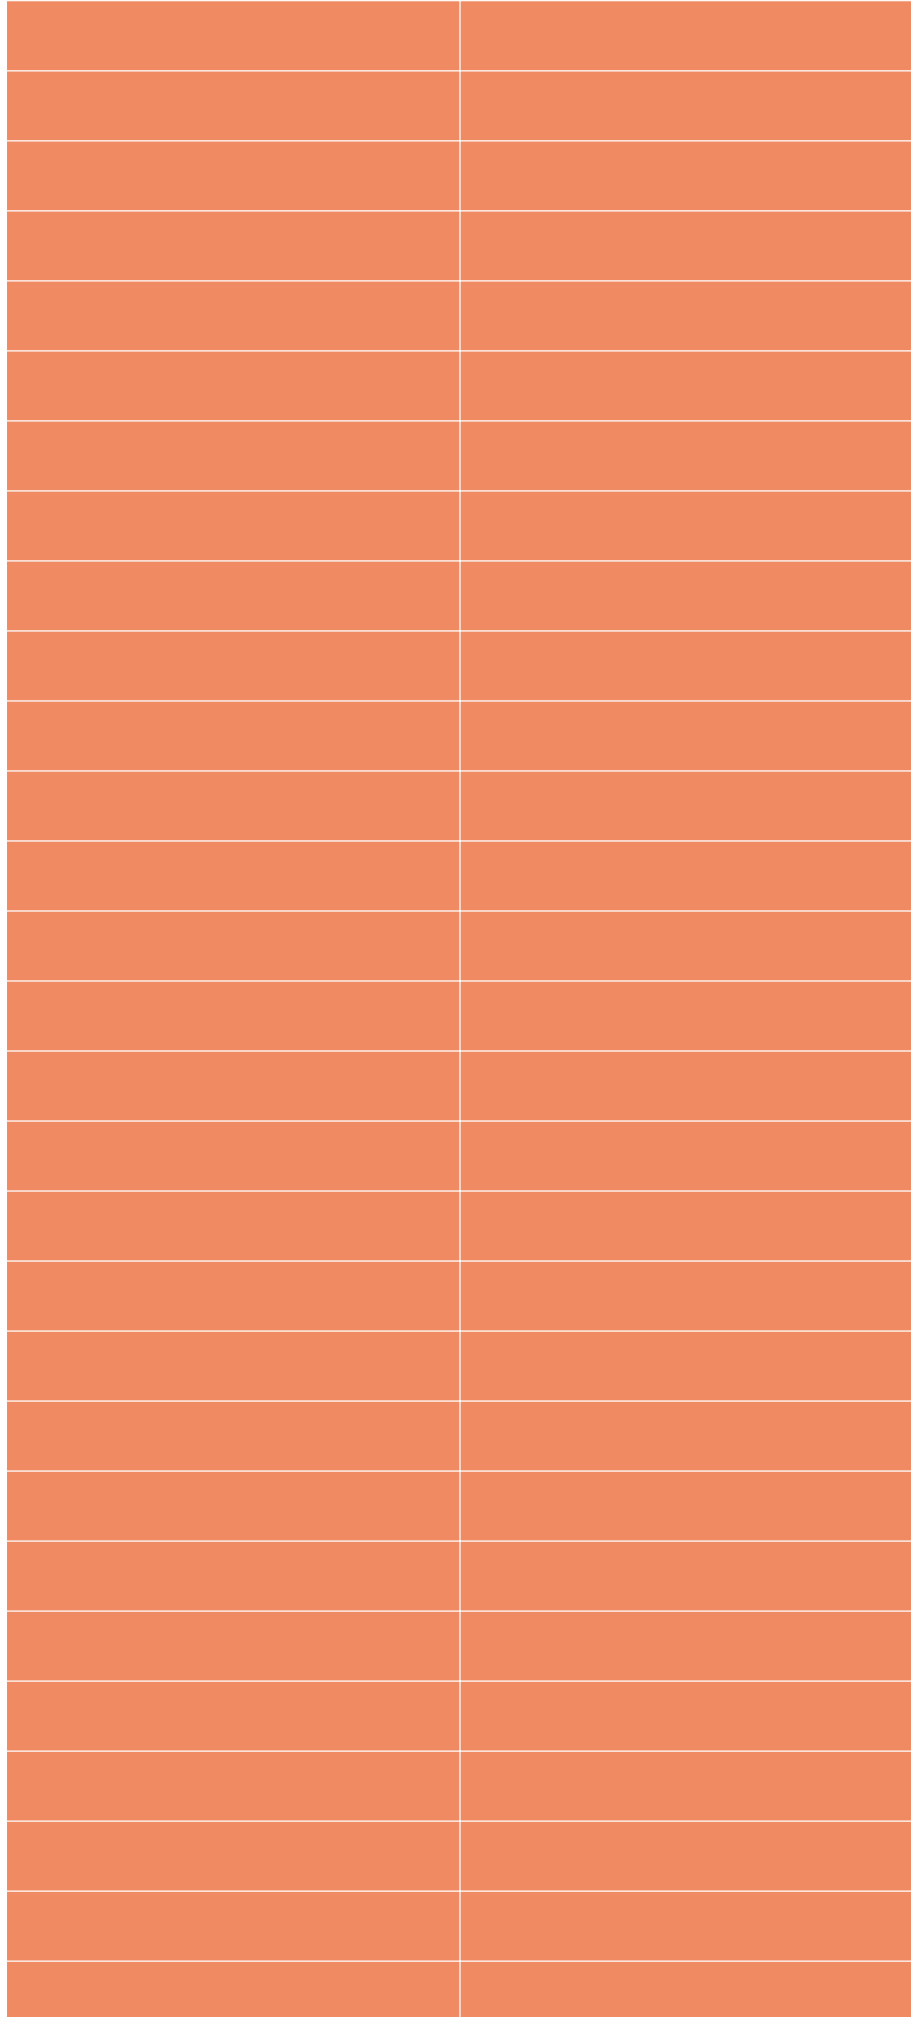

Gene type

- Absent
- Core
- Accessory
- Transposase

Compartment

- BSI
- Environmental
- Livestock
- WwTW

Cluster 23  
32 core genes  
92 accessory genes

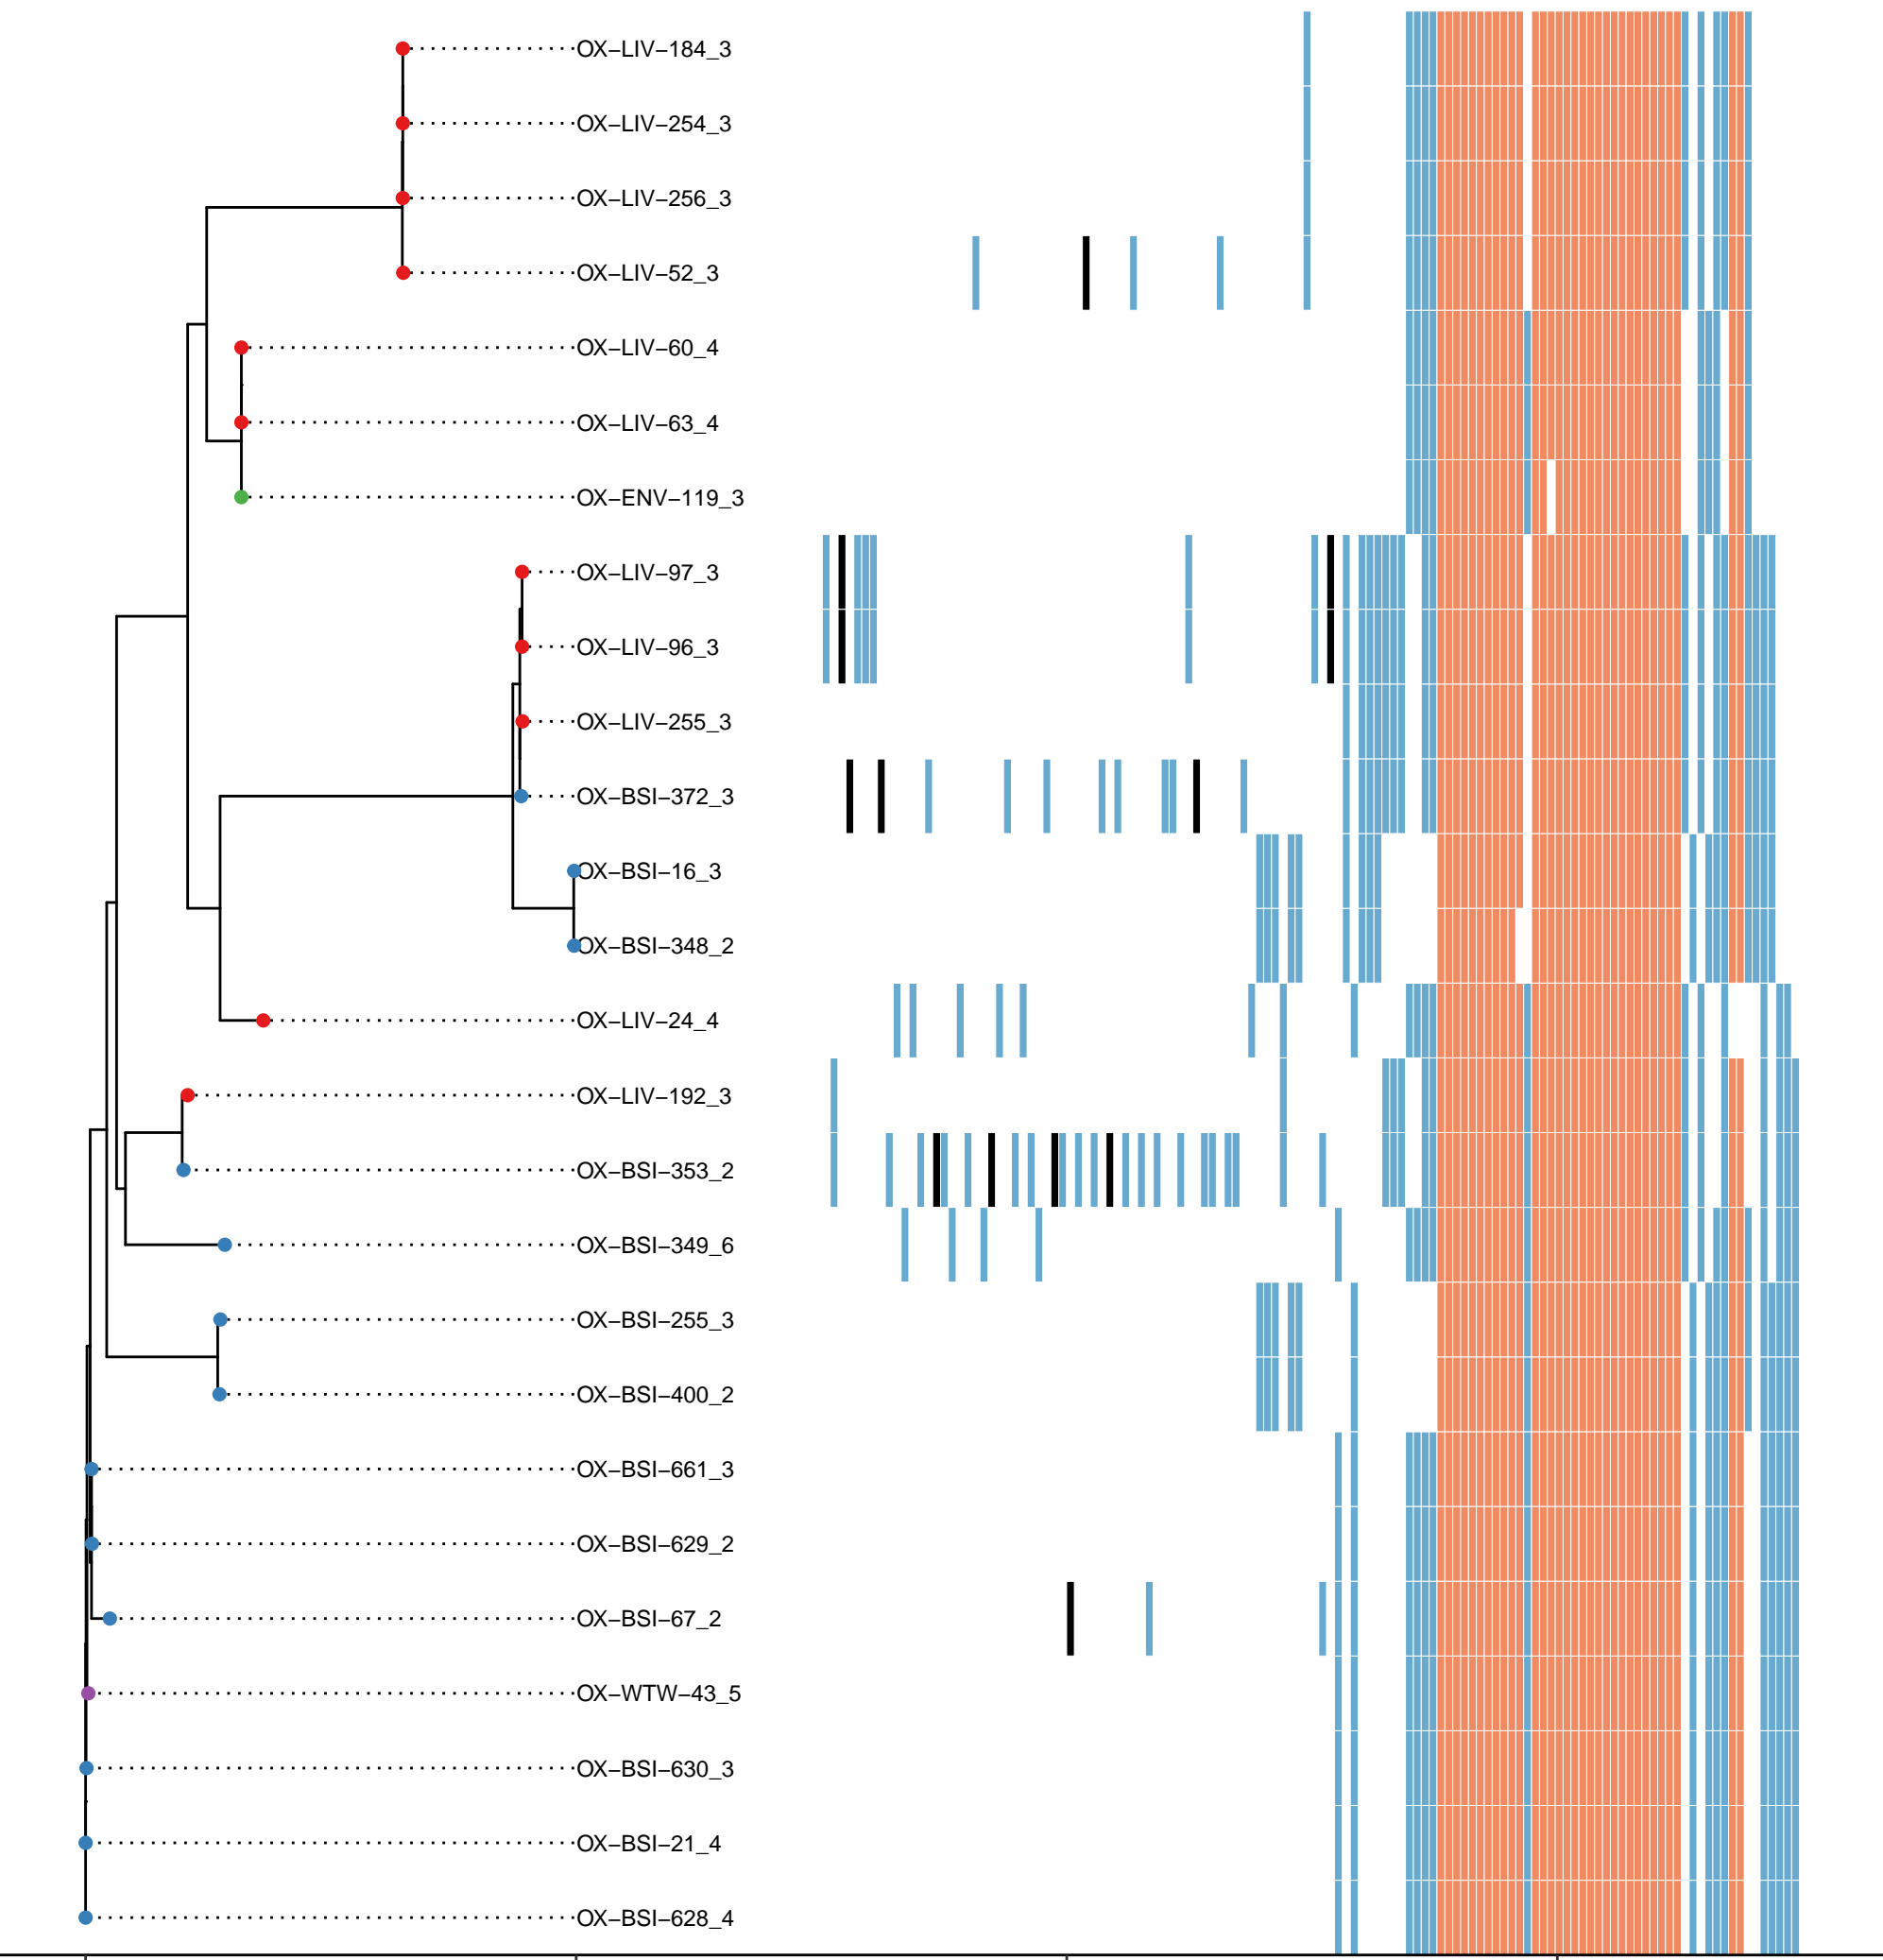

Gene type

- Absent
- Core
- Accessory
- Transposase

Compartment

- BSI
- Environmental
- Livestock
- WwTW

Cluster 24  
7 core genes  
3 accessory genes

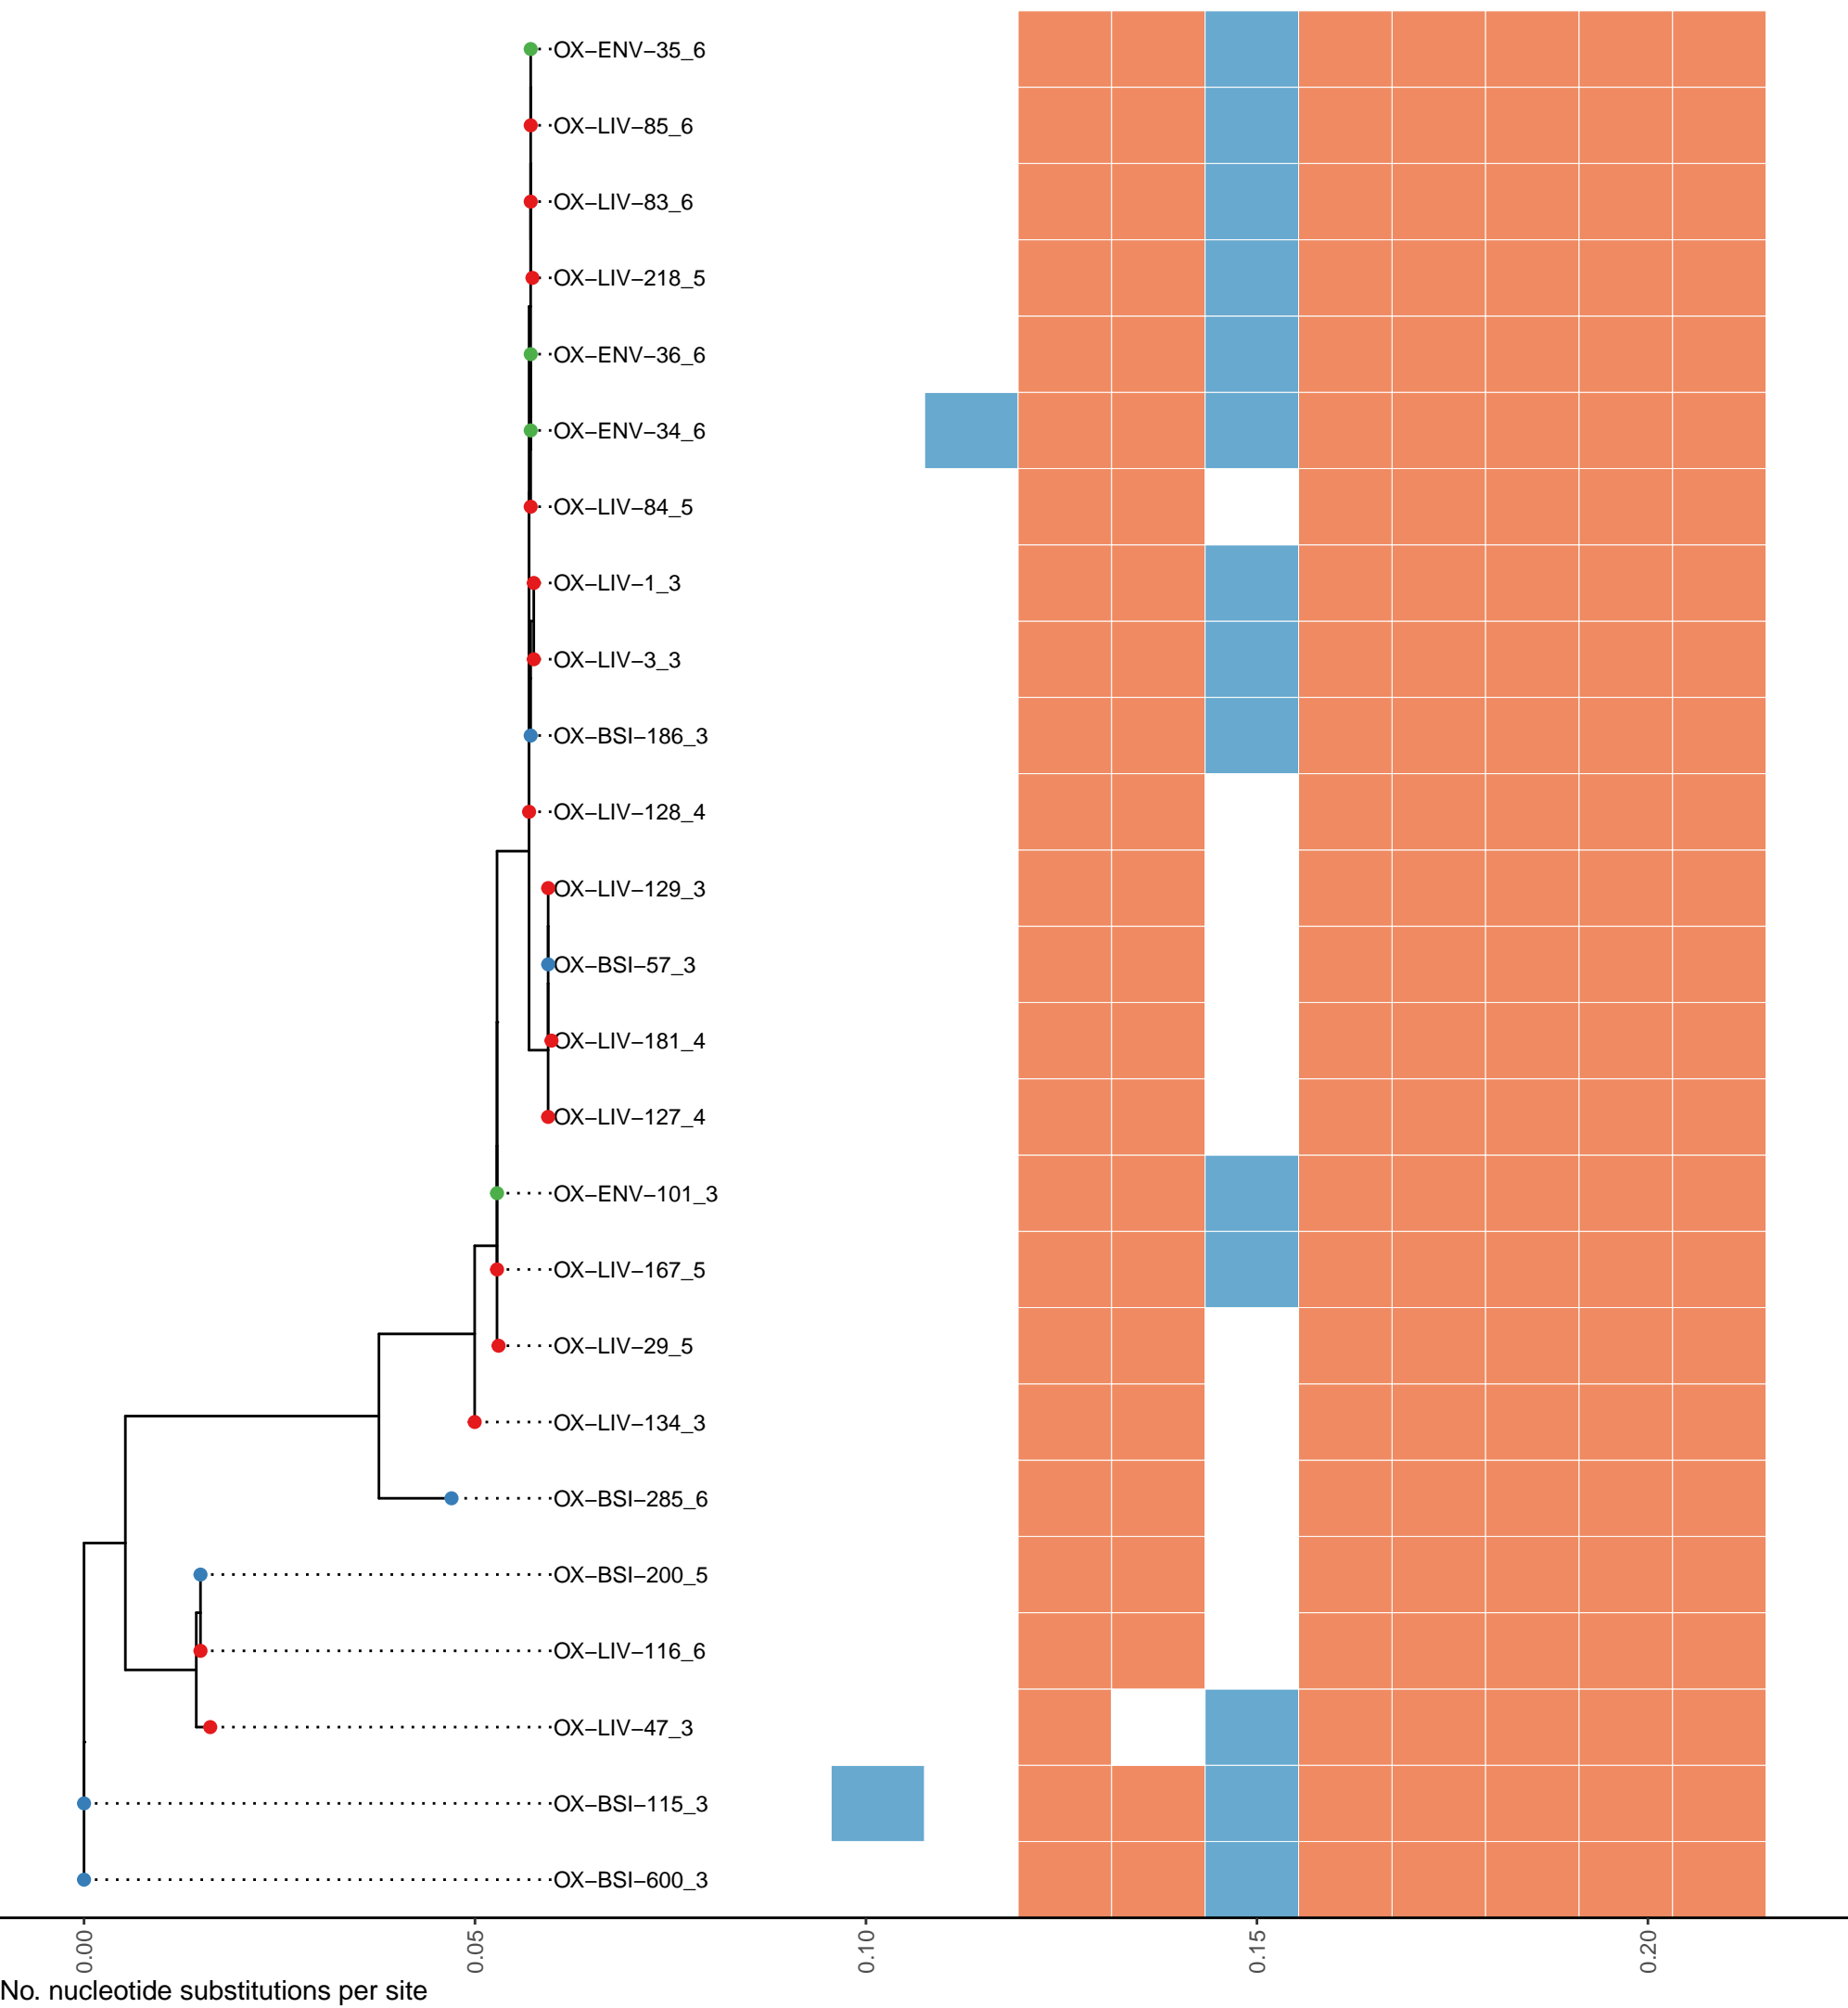

Gene type

- Absent
- Core
- Accessory
- Transposase

Compartment

- BSI
- Environmental
- Livestock
- WwTW

Cluster 25  
153 core genes  
704 accessory genes

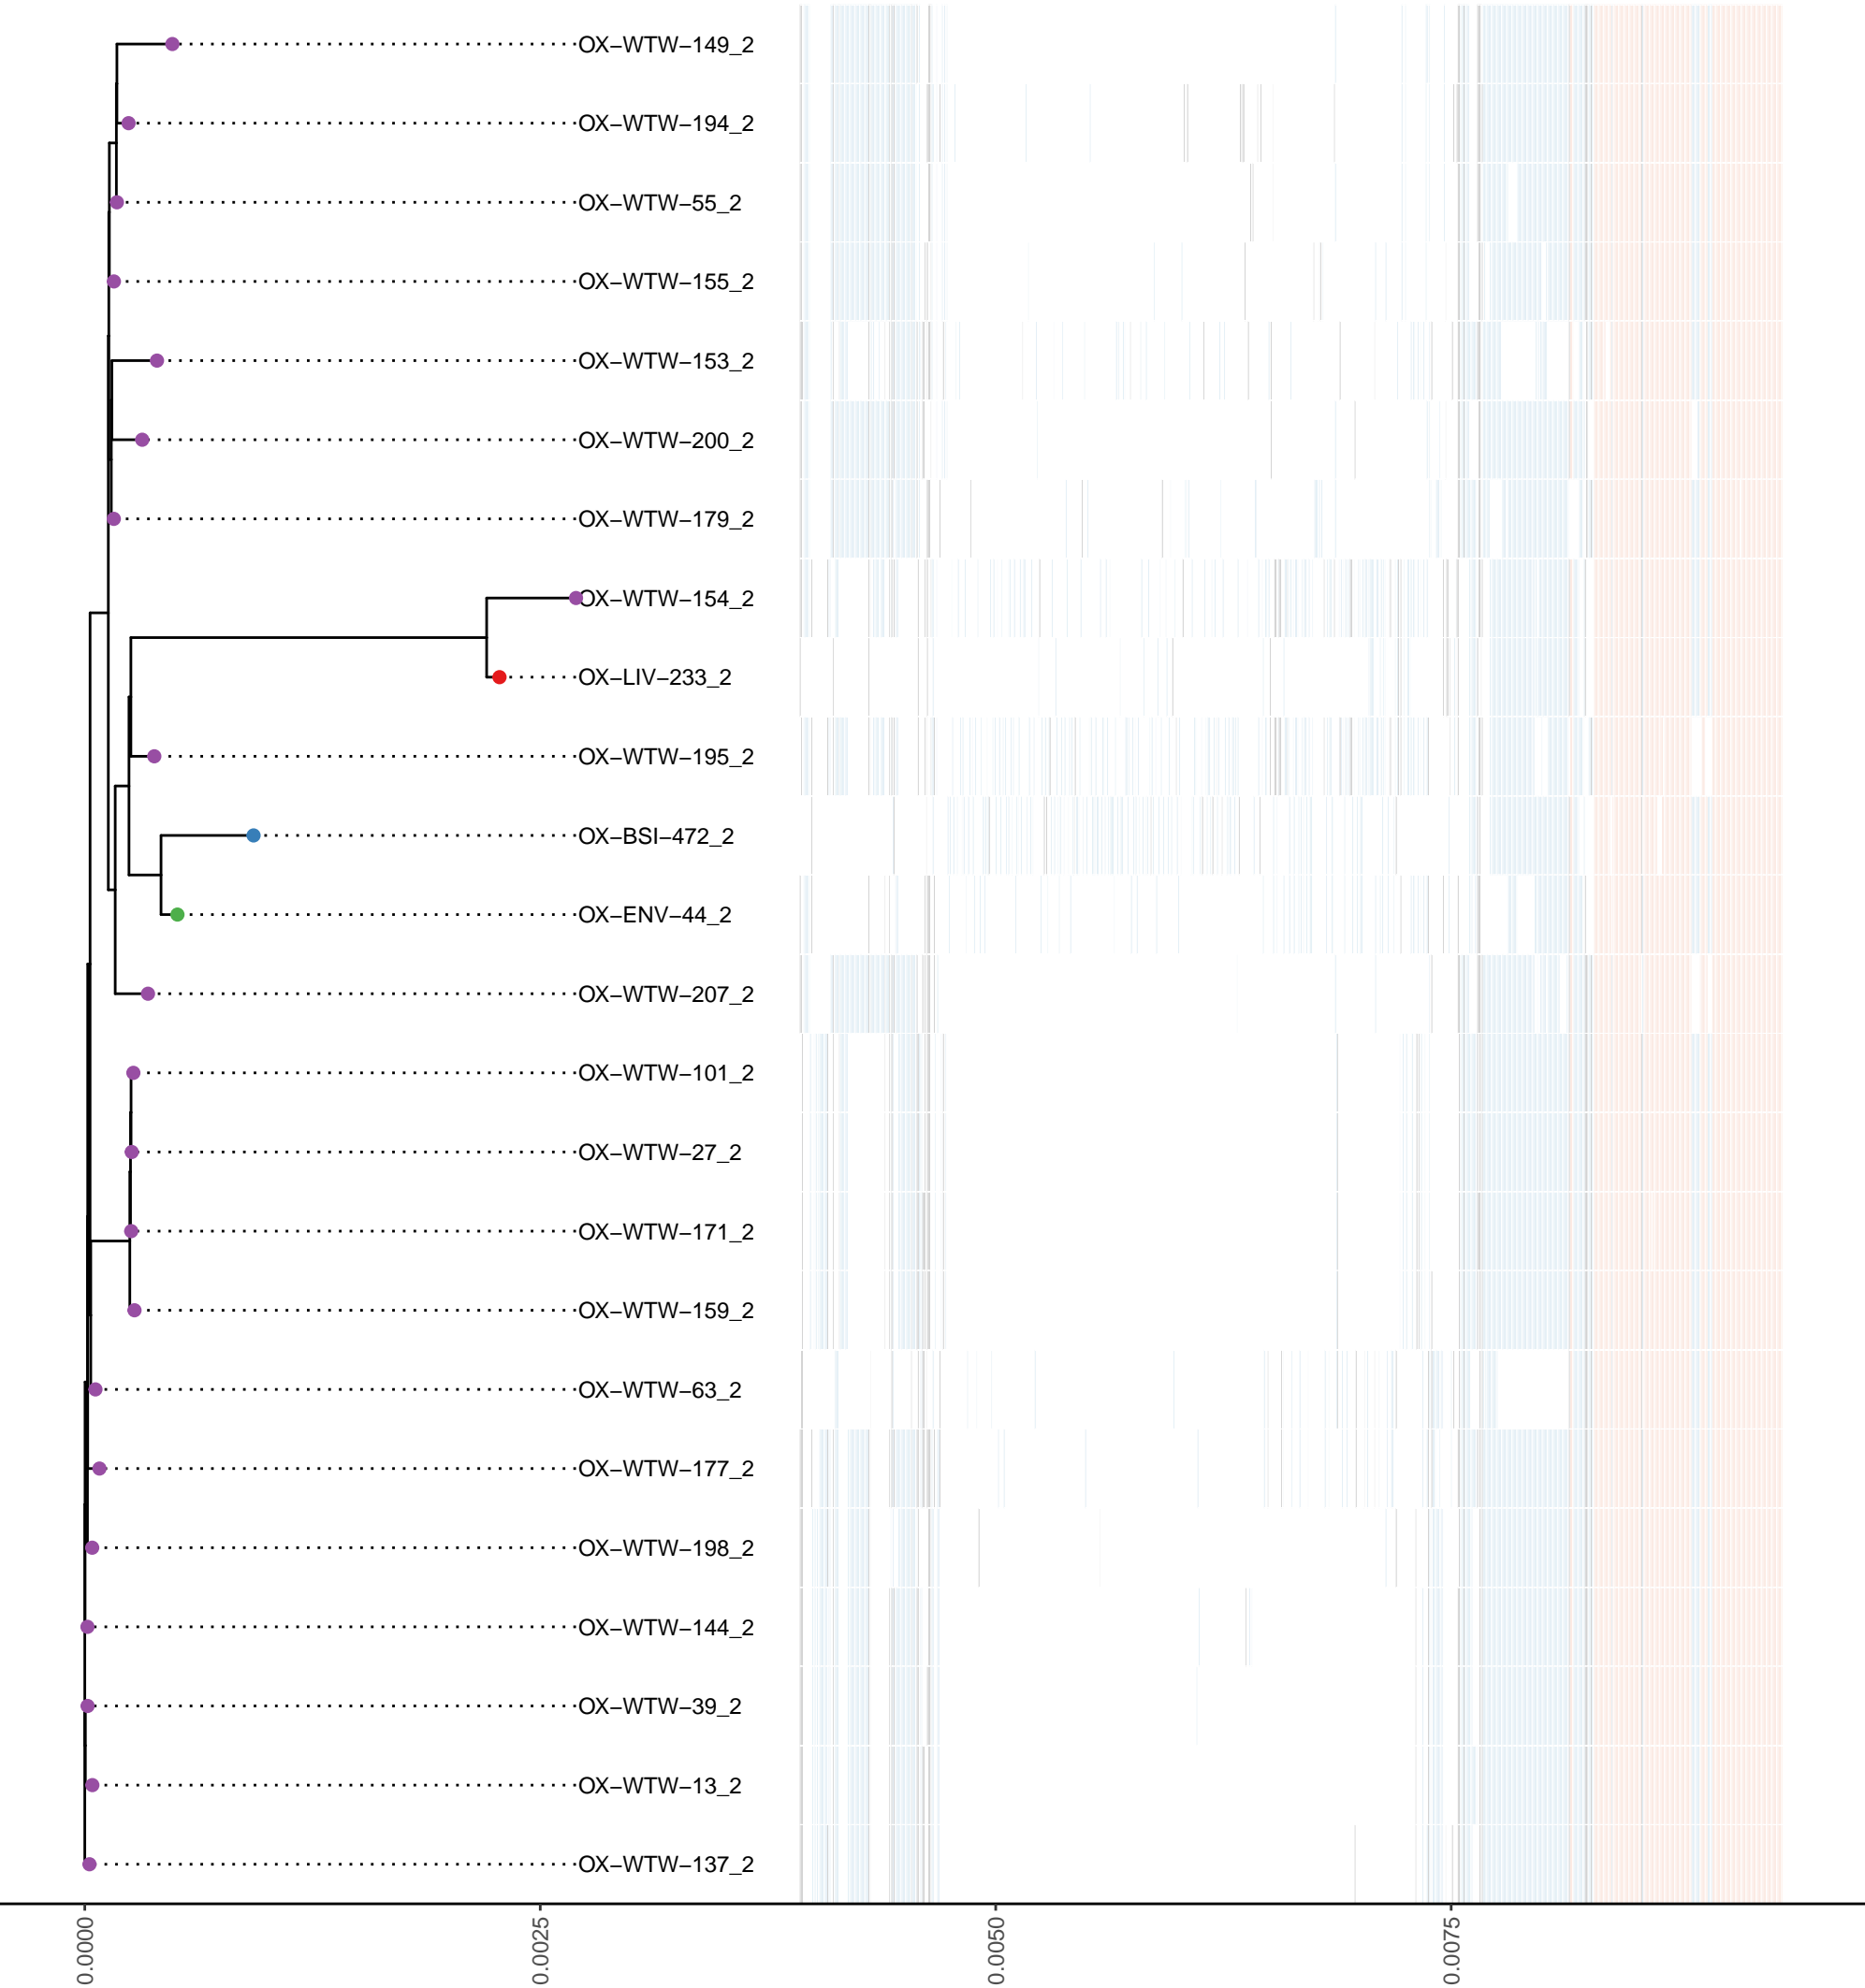

Gene type

- Absent
- Core
- Accessory
- Transposase

Compartment

- BSI
- Environmental
- Livestock
- WwTW

Cluster 27  
92 core genes  
157 accessory genes

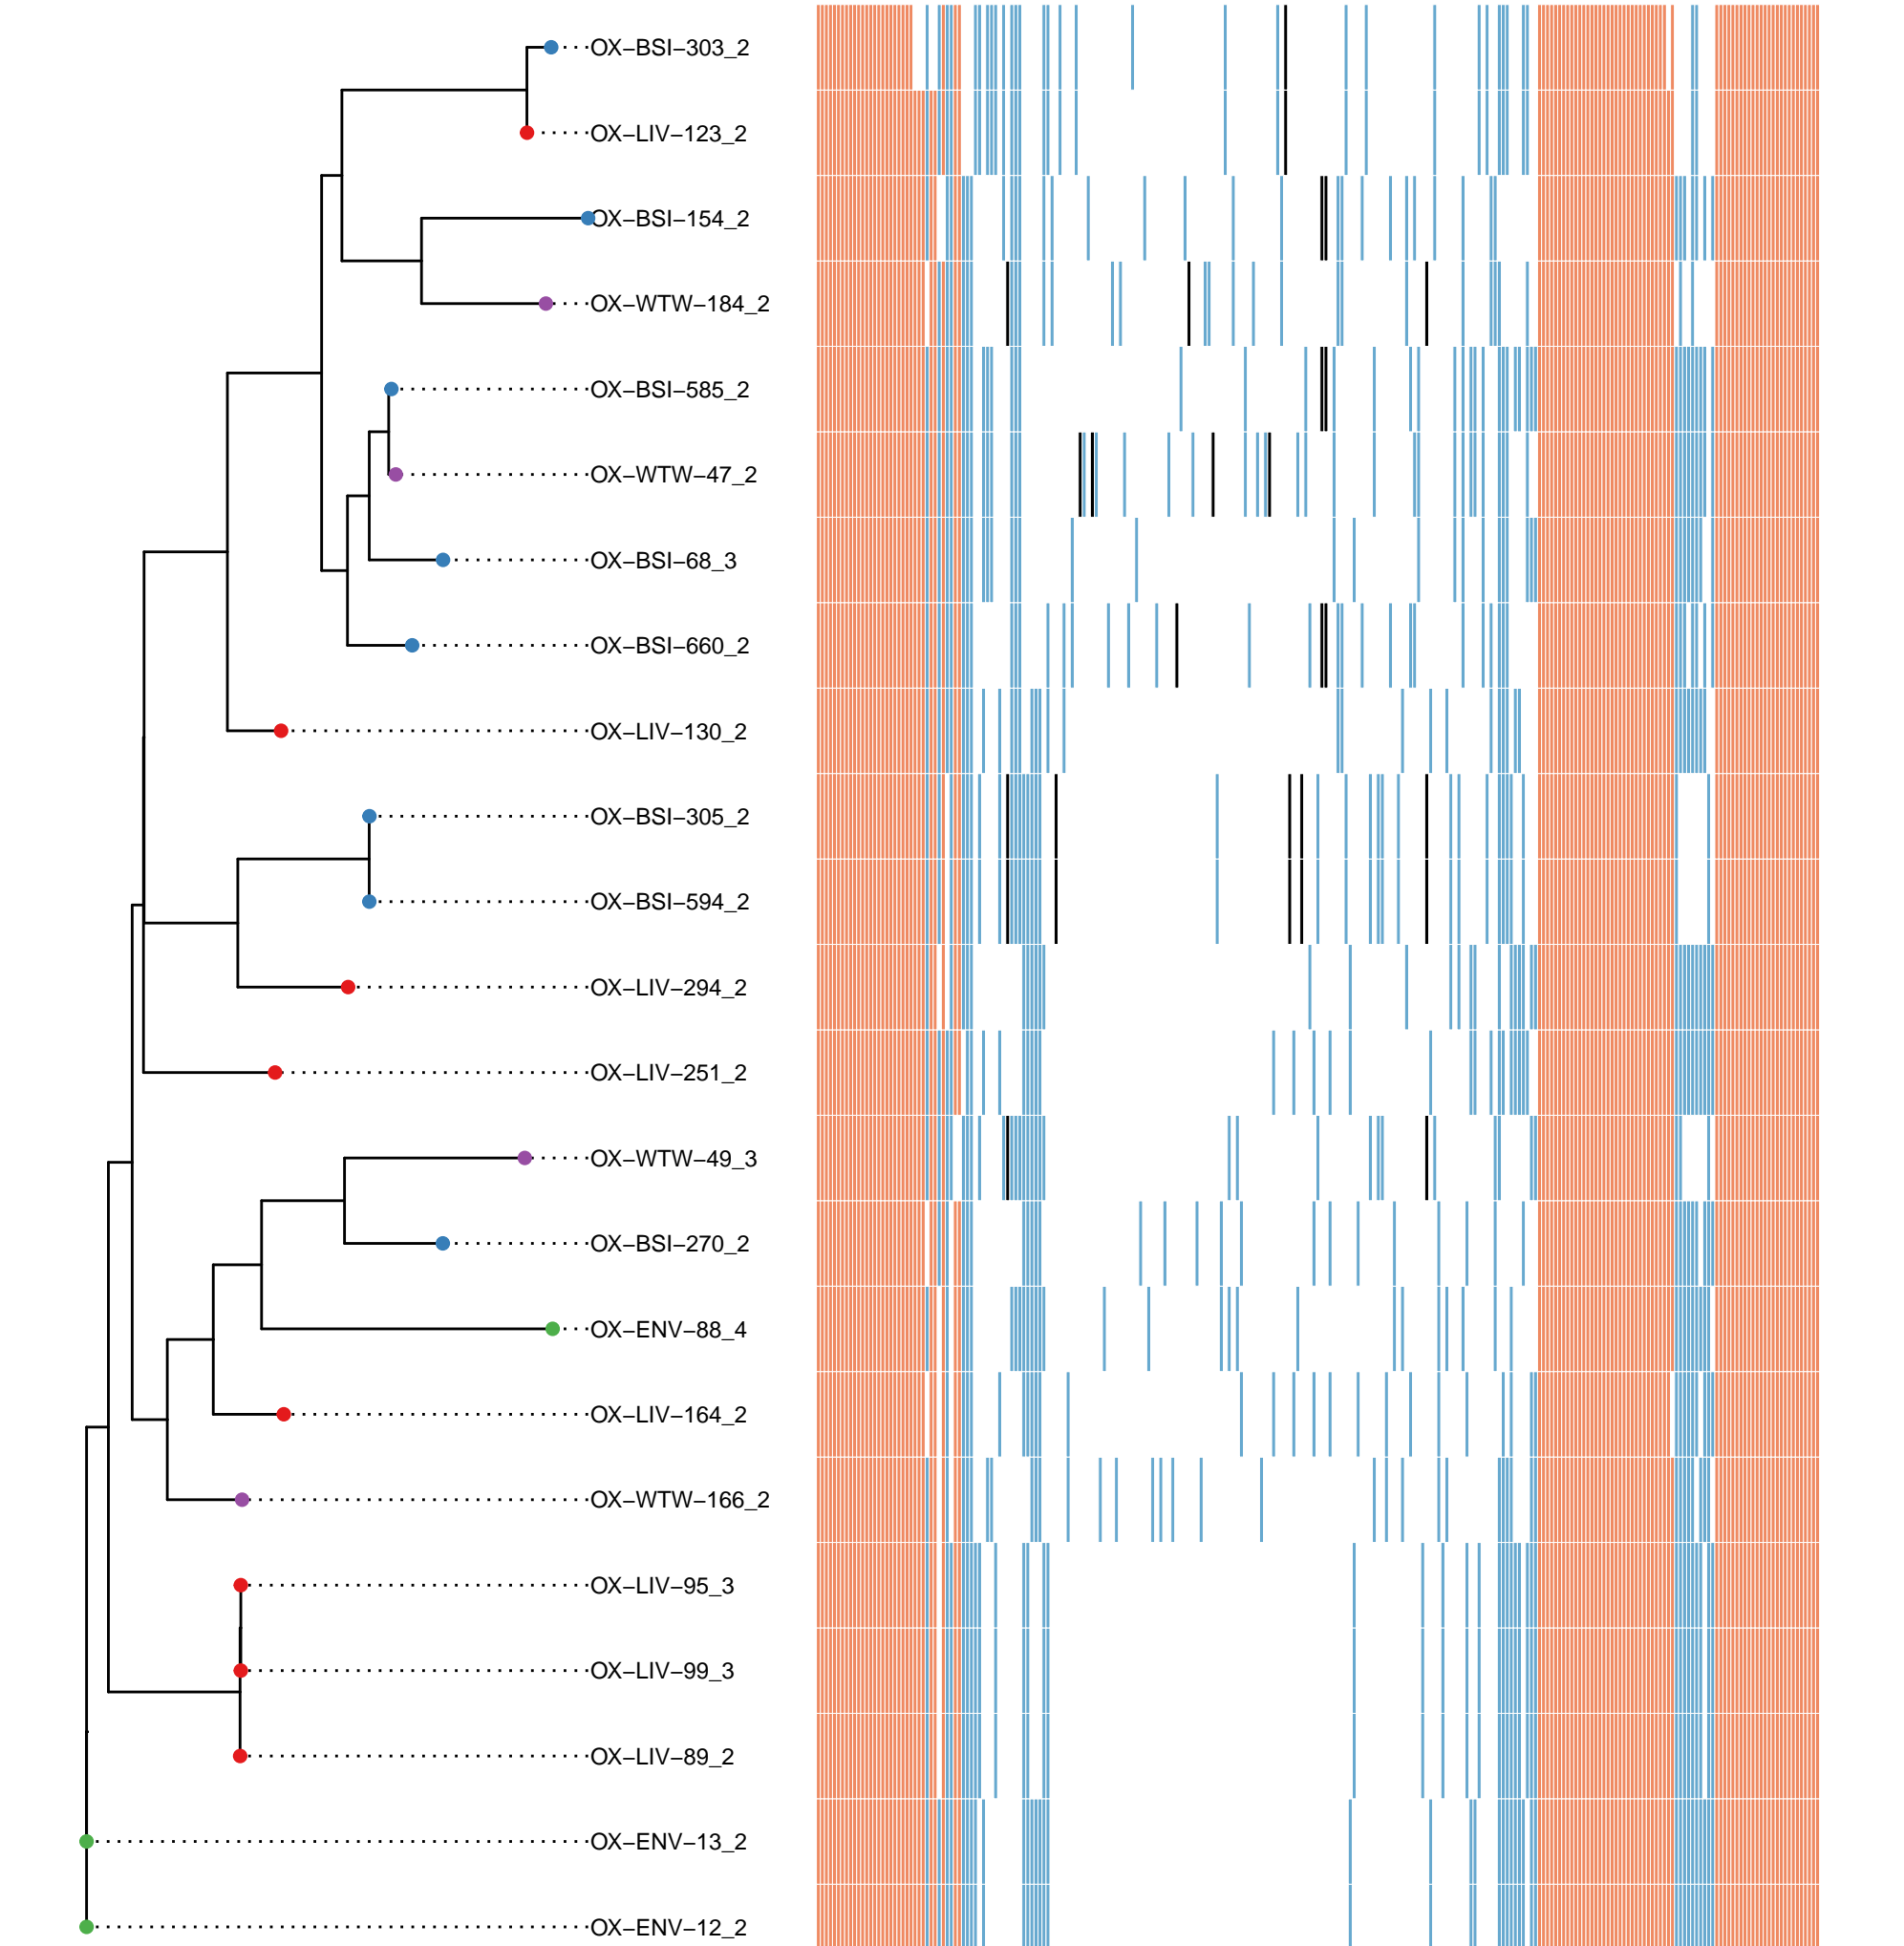

No. nucleotide substitutions per site

Cluster 28  
3 core genes  
0 accessory genes

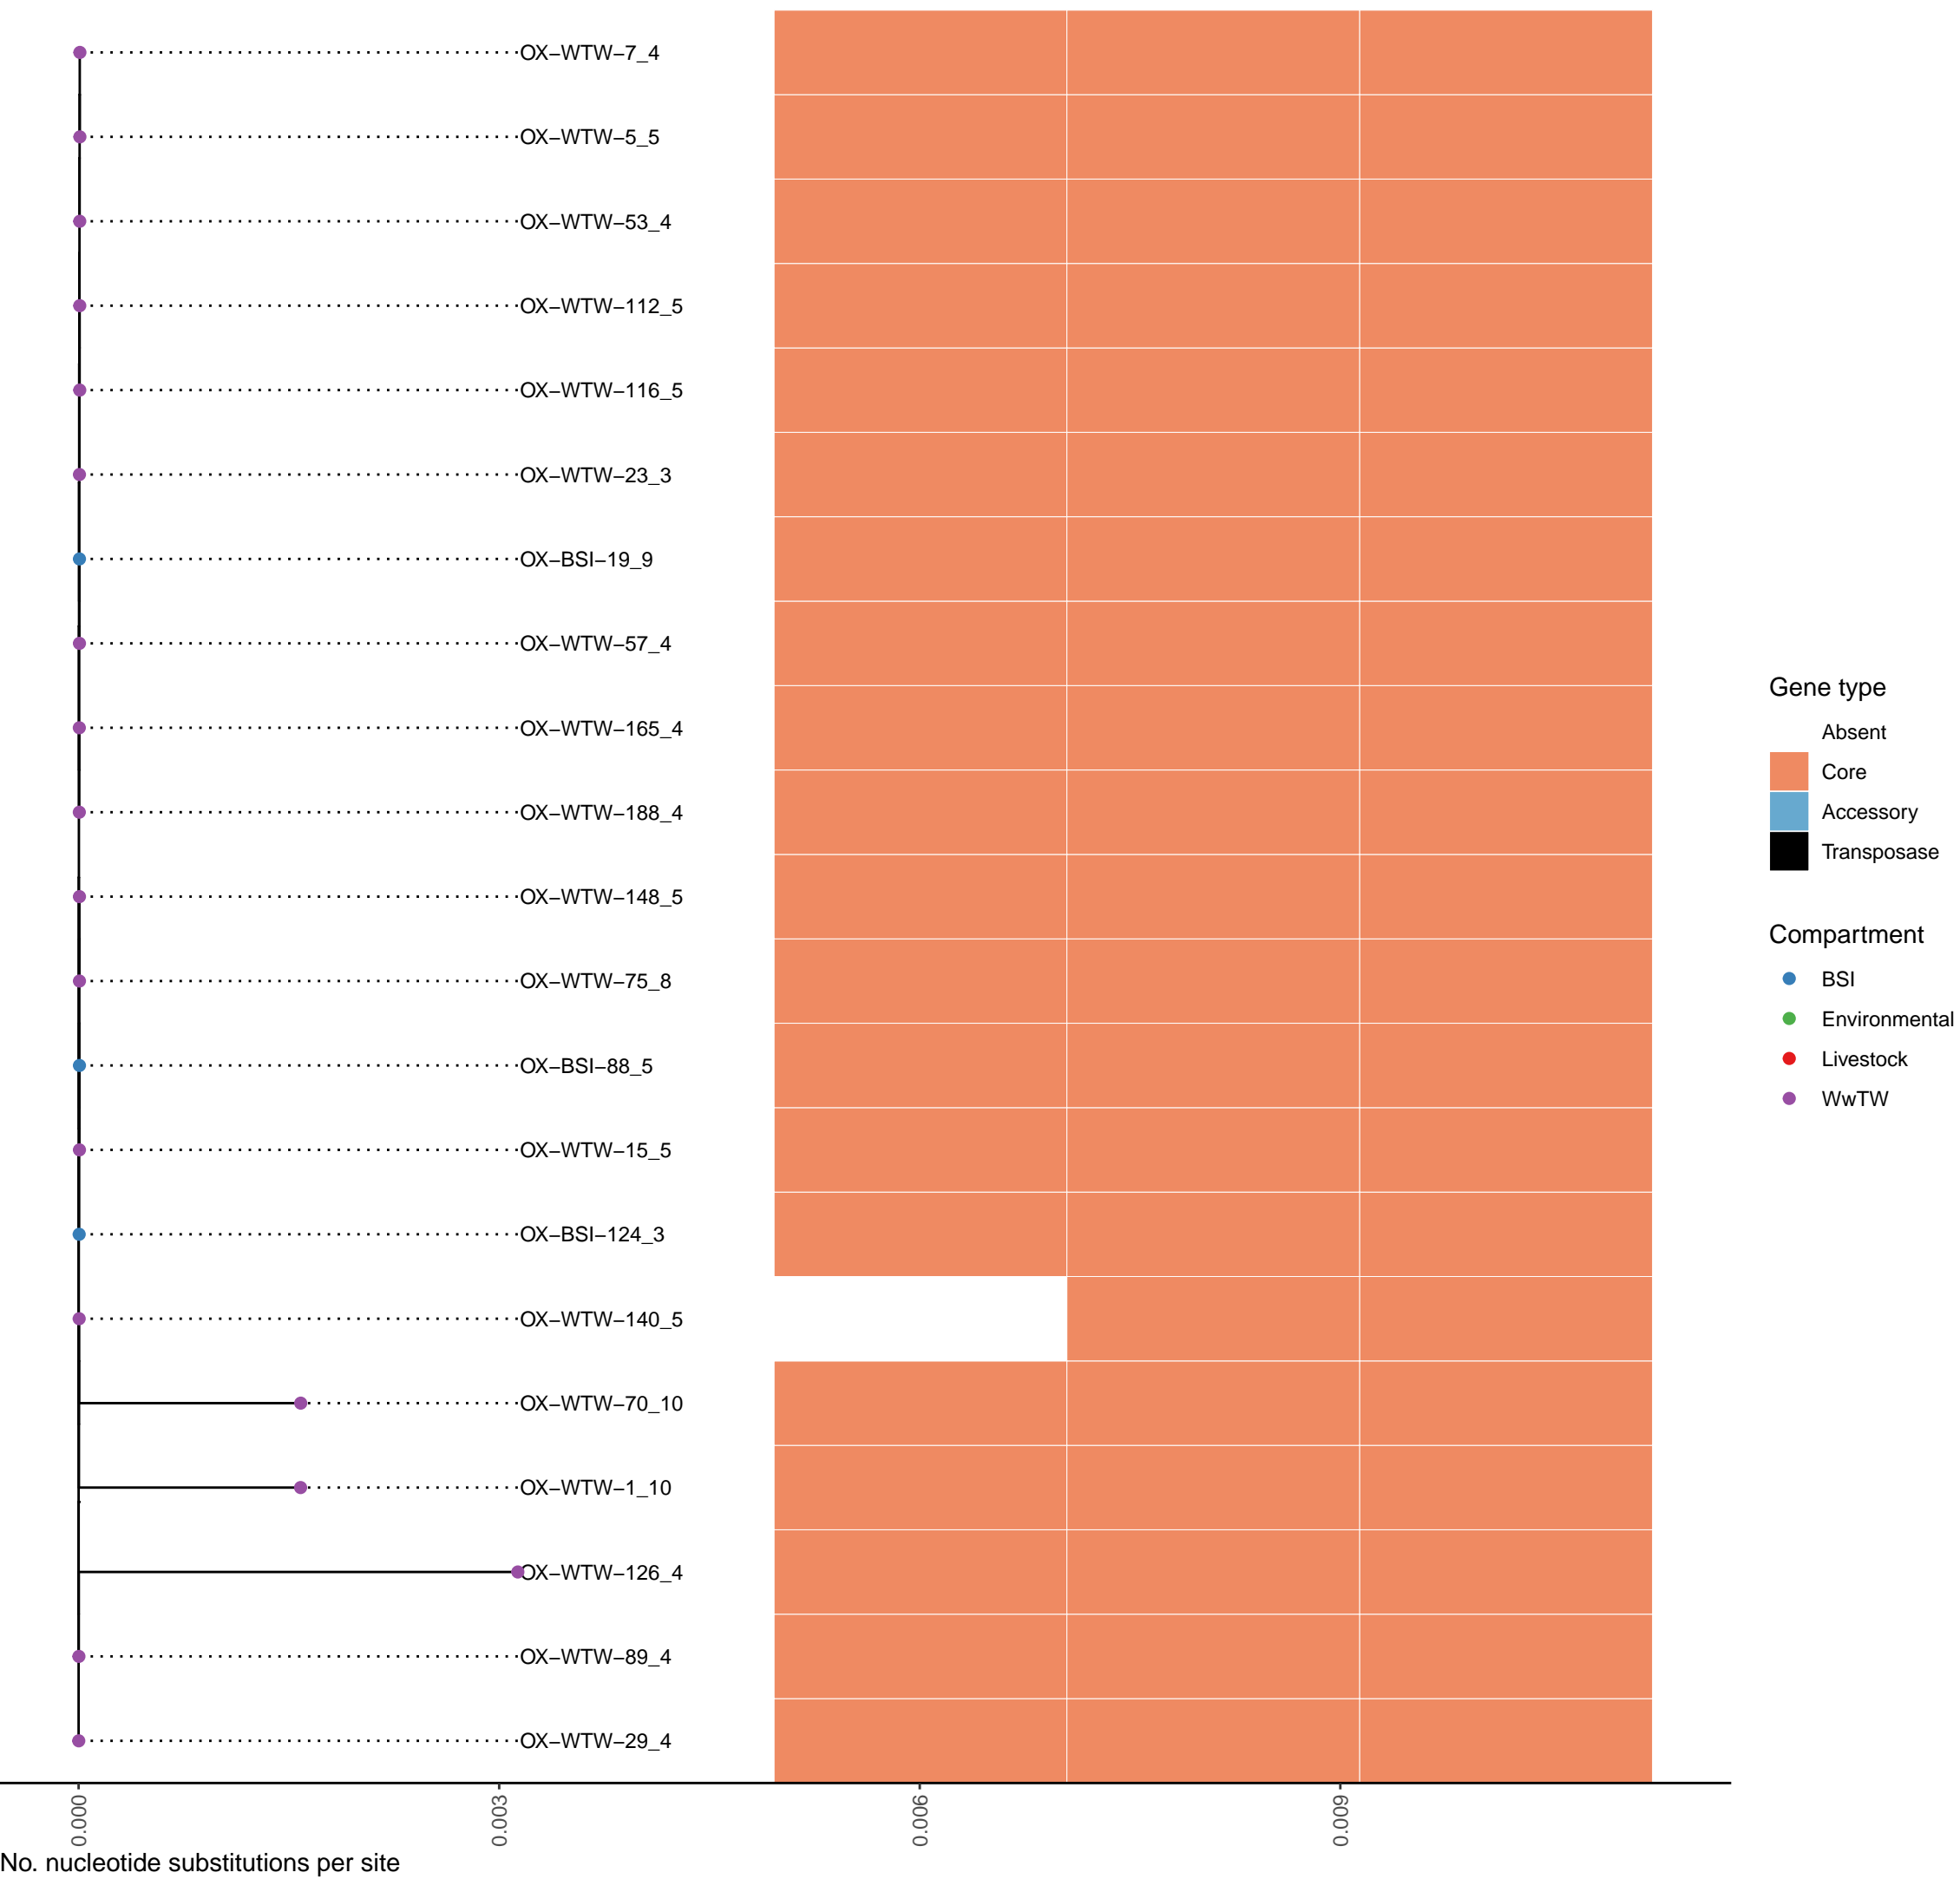

Cluster 30  
55 core genes  
269 accessory genes

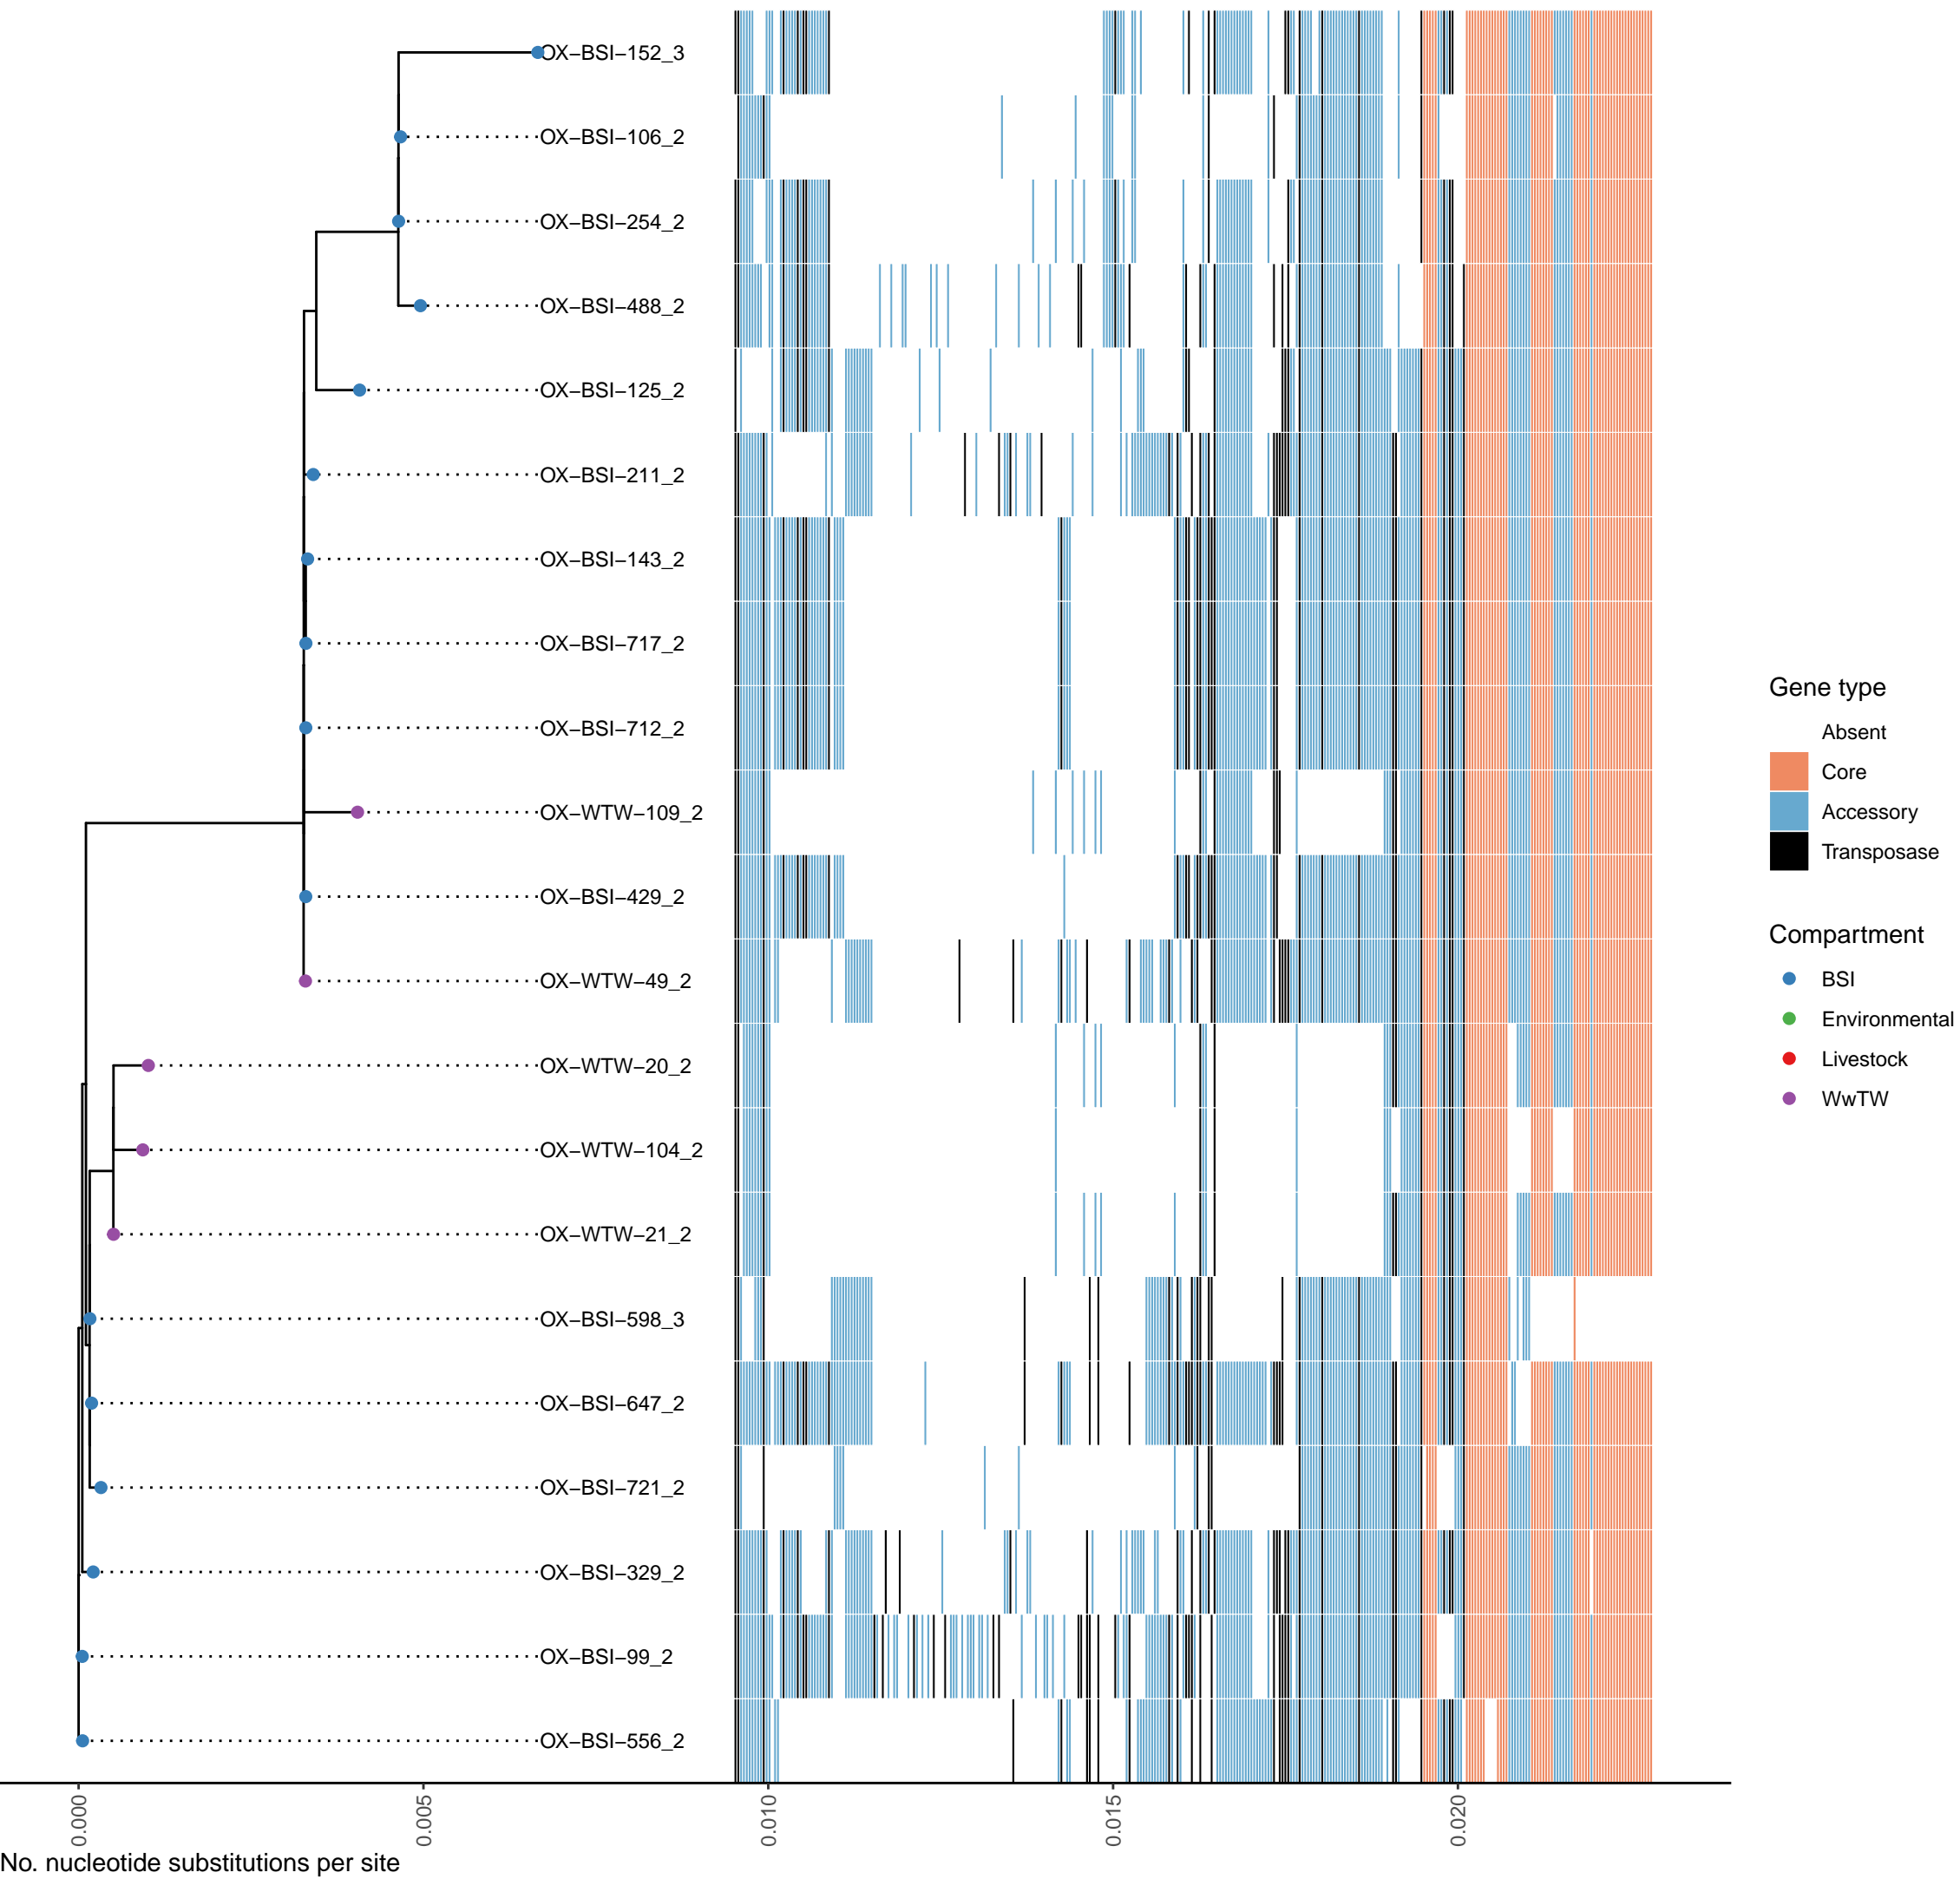

Cluster 31  
7 core genes  
7 accessory genes

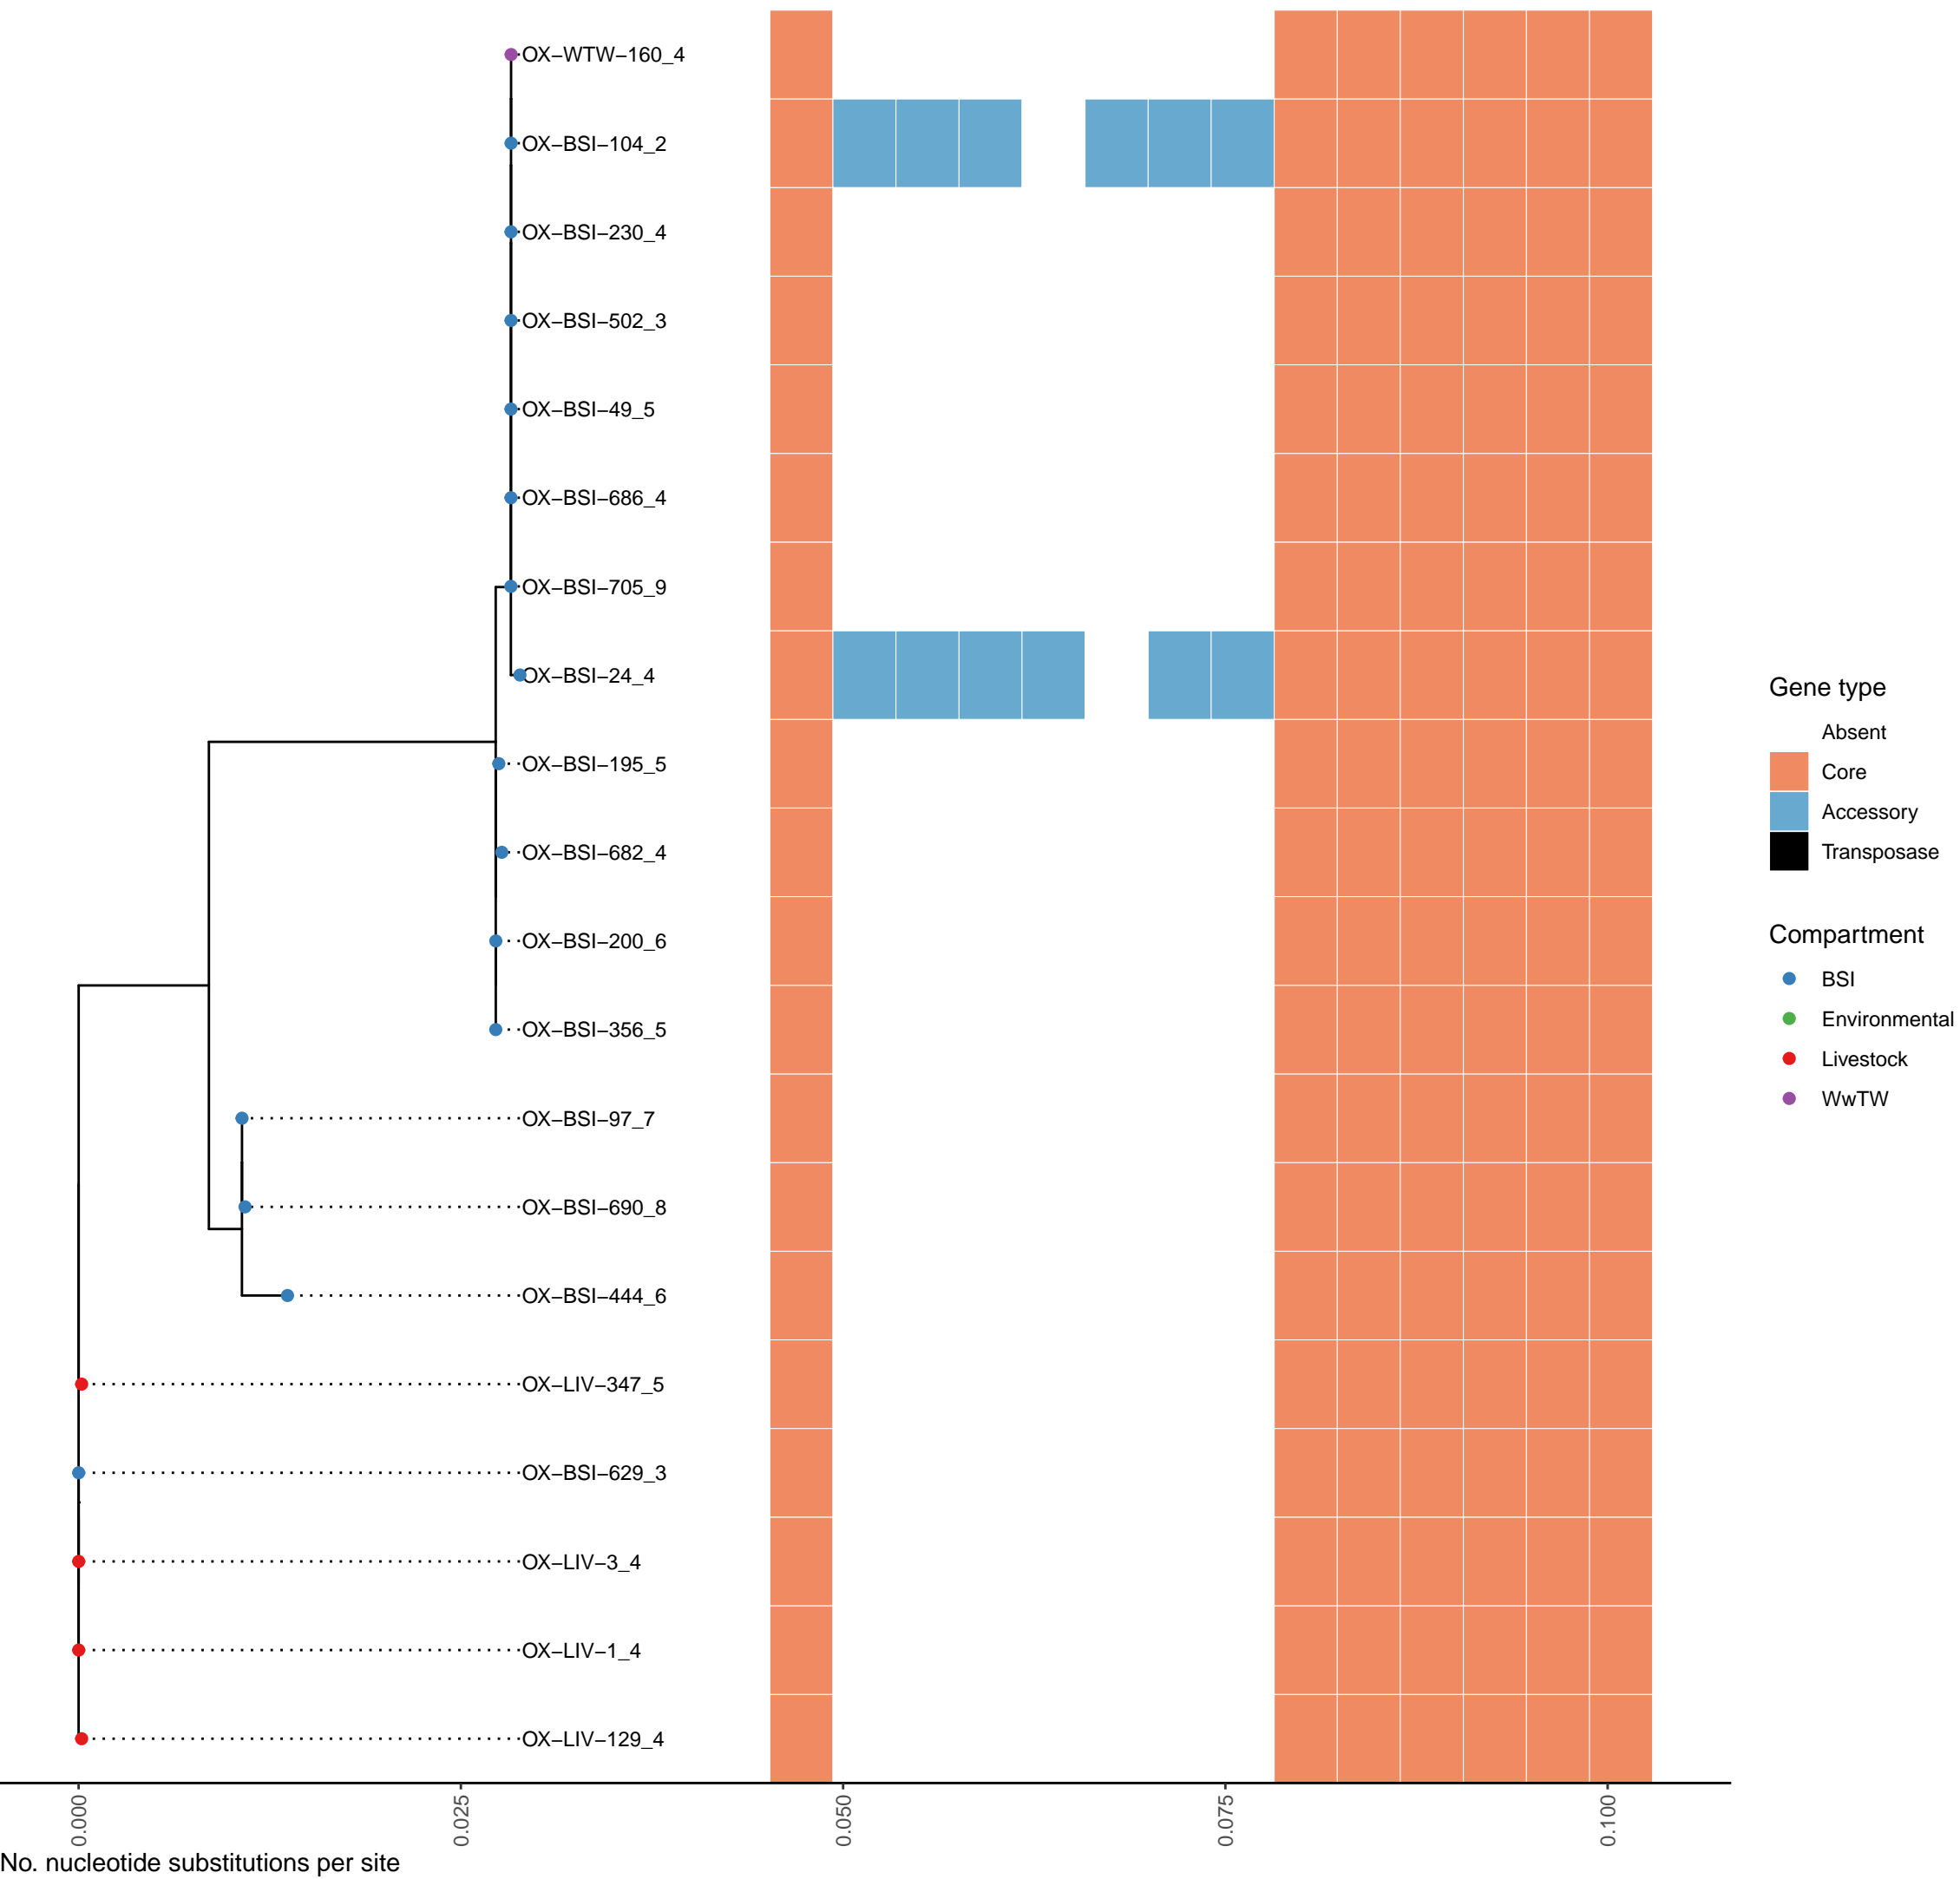

Cluster 33  
114 core genes  
353 accessory genes

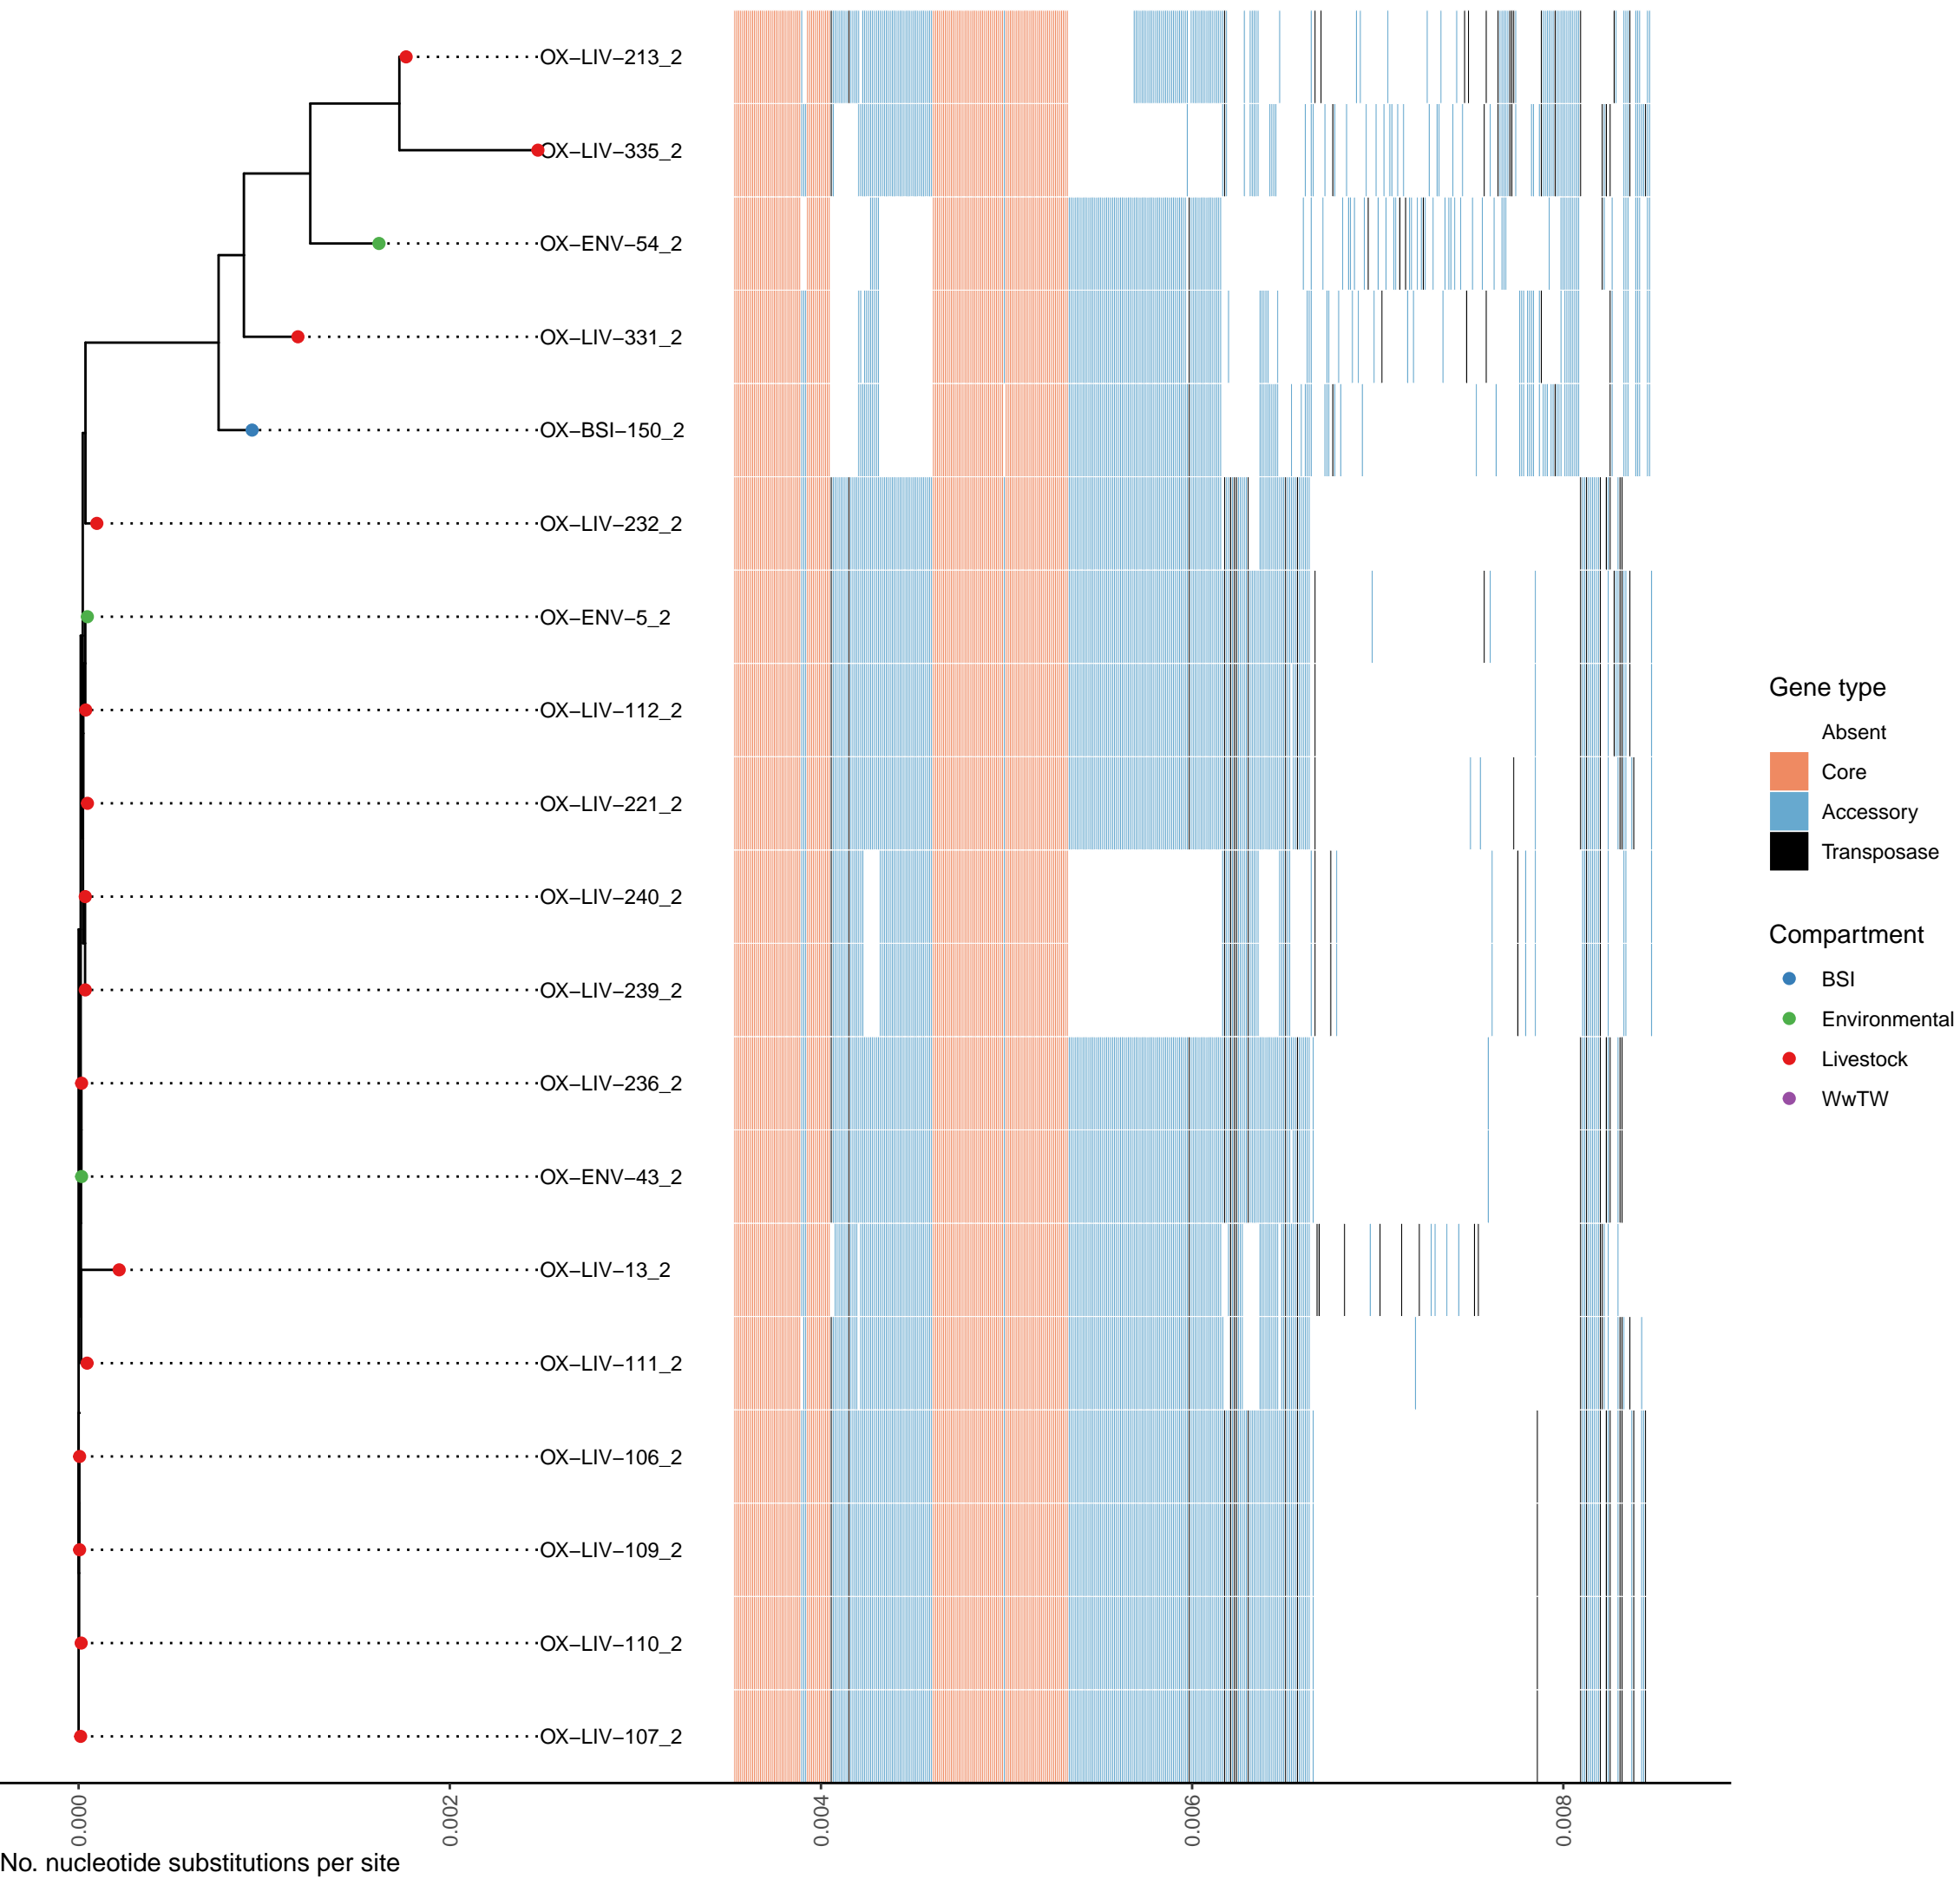

Cluster 34  
2 core genes  
3 accessory genes

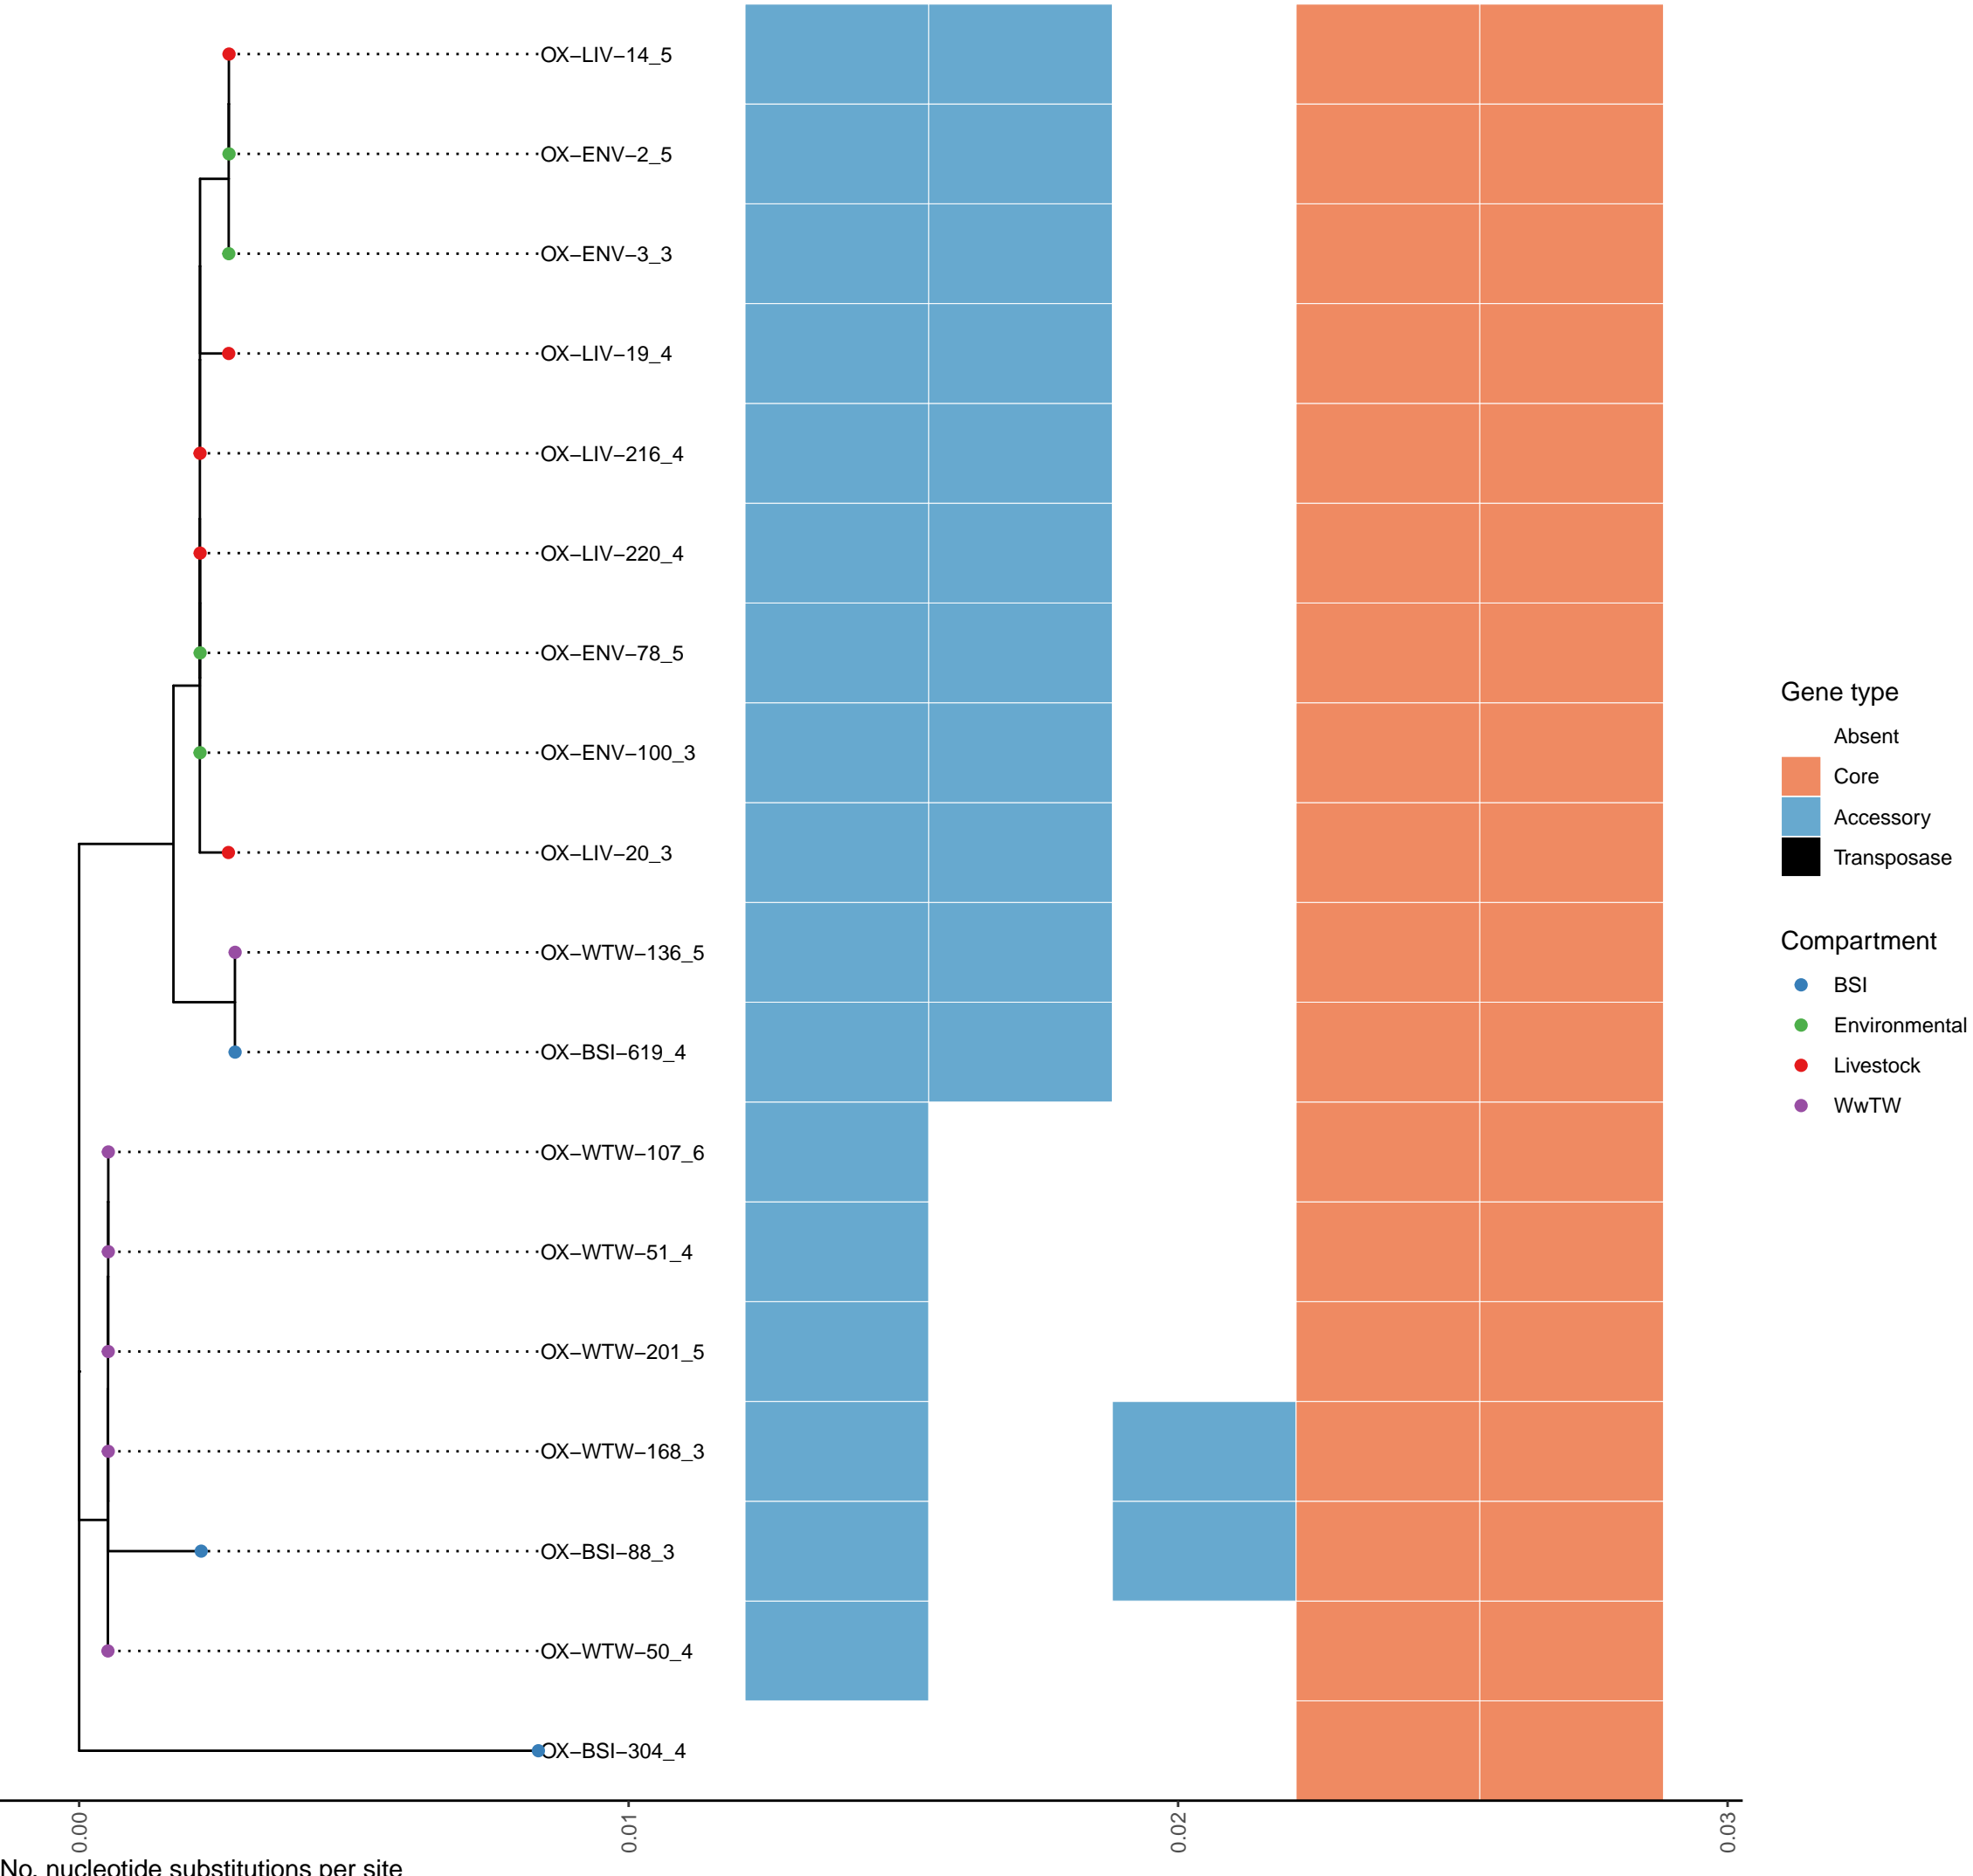

Cluster 35  
50 core genes  
82 accessory genes

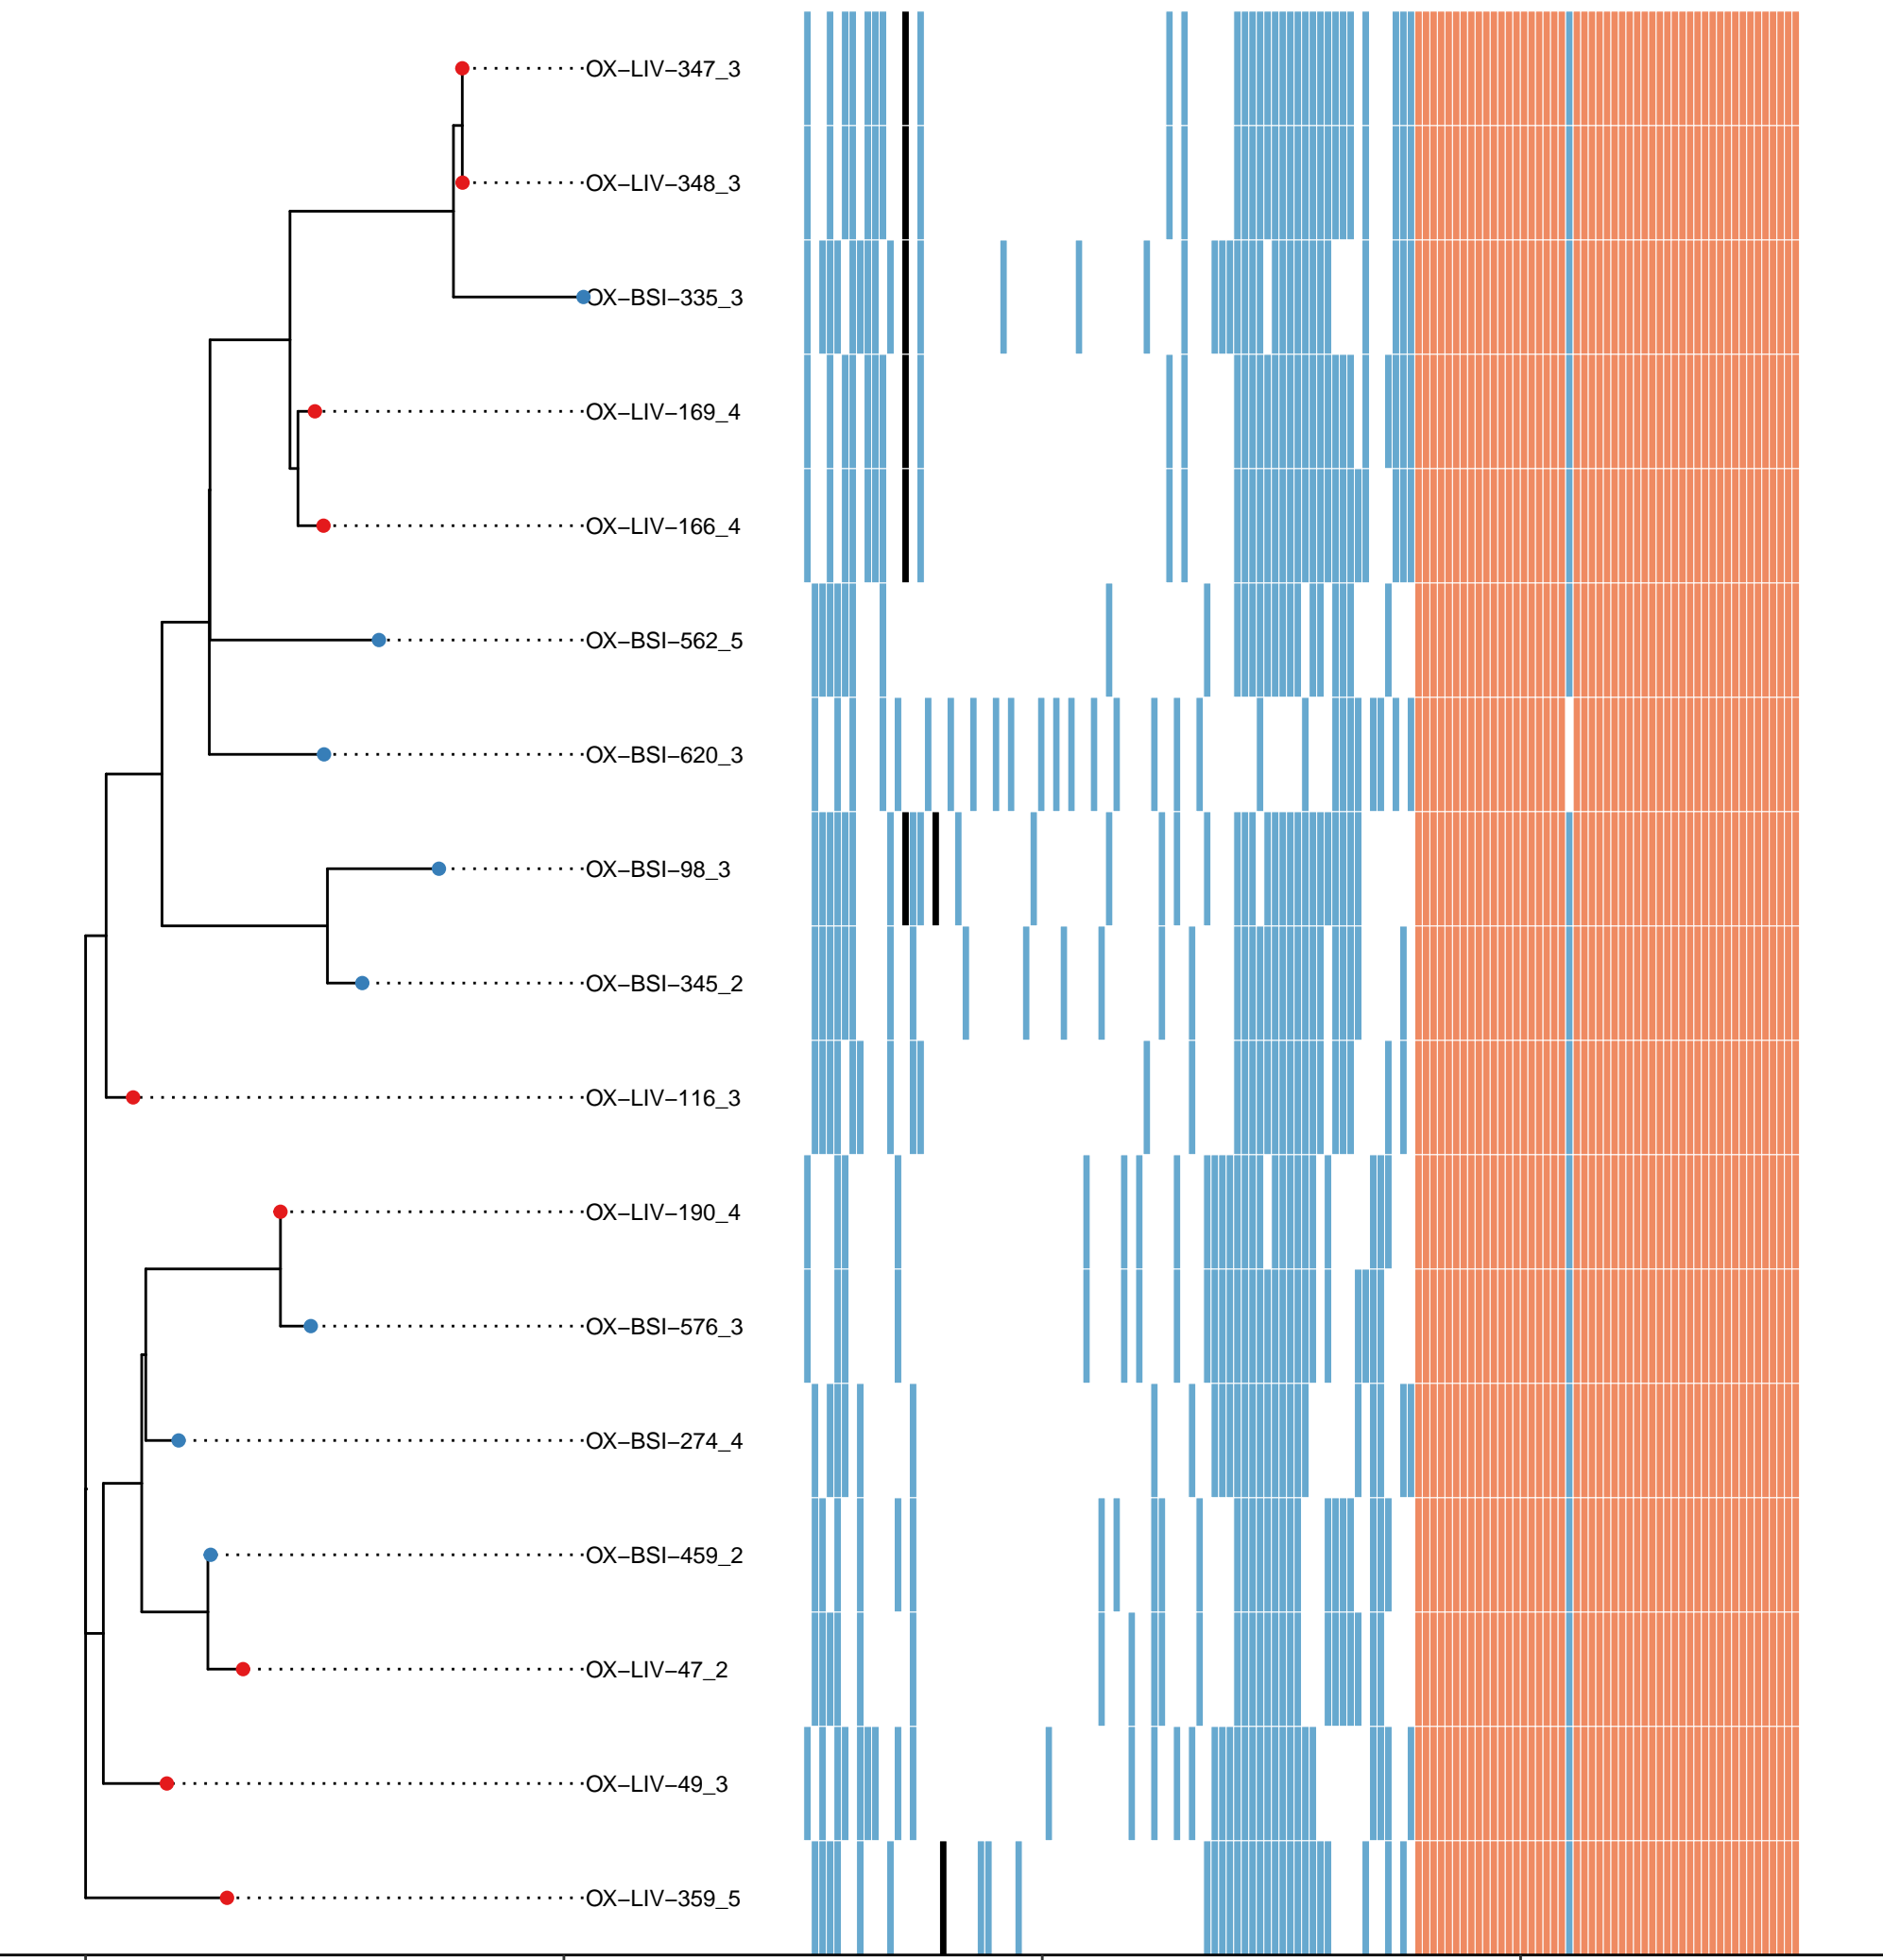

No. nucleotide substitutions per site

Cluster 36  
103 core genes  
131 accessory genes

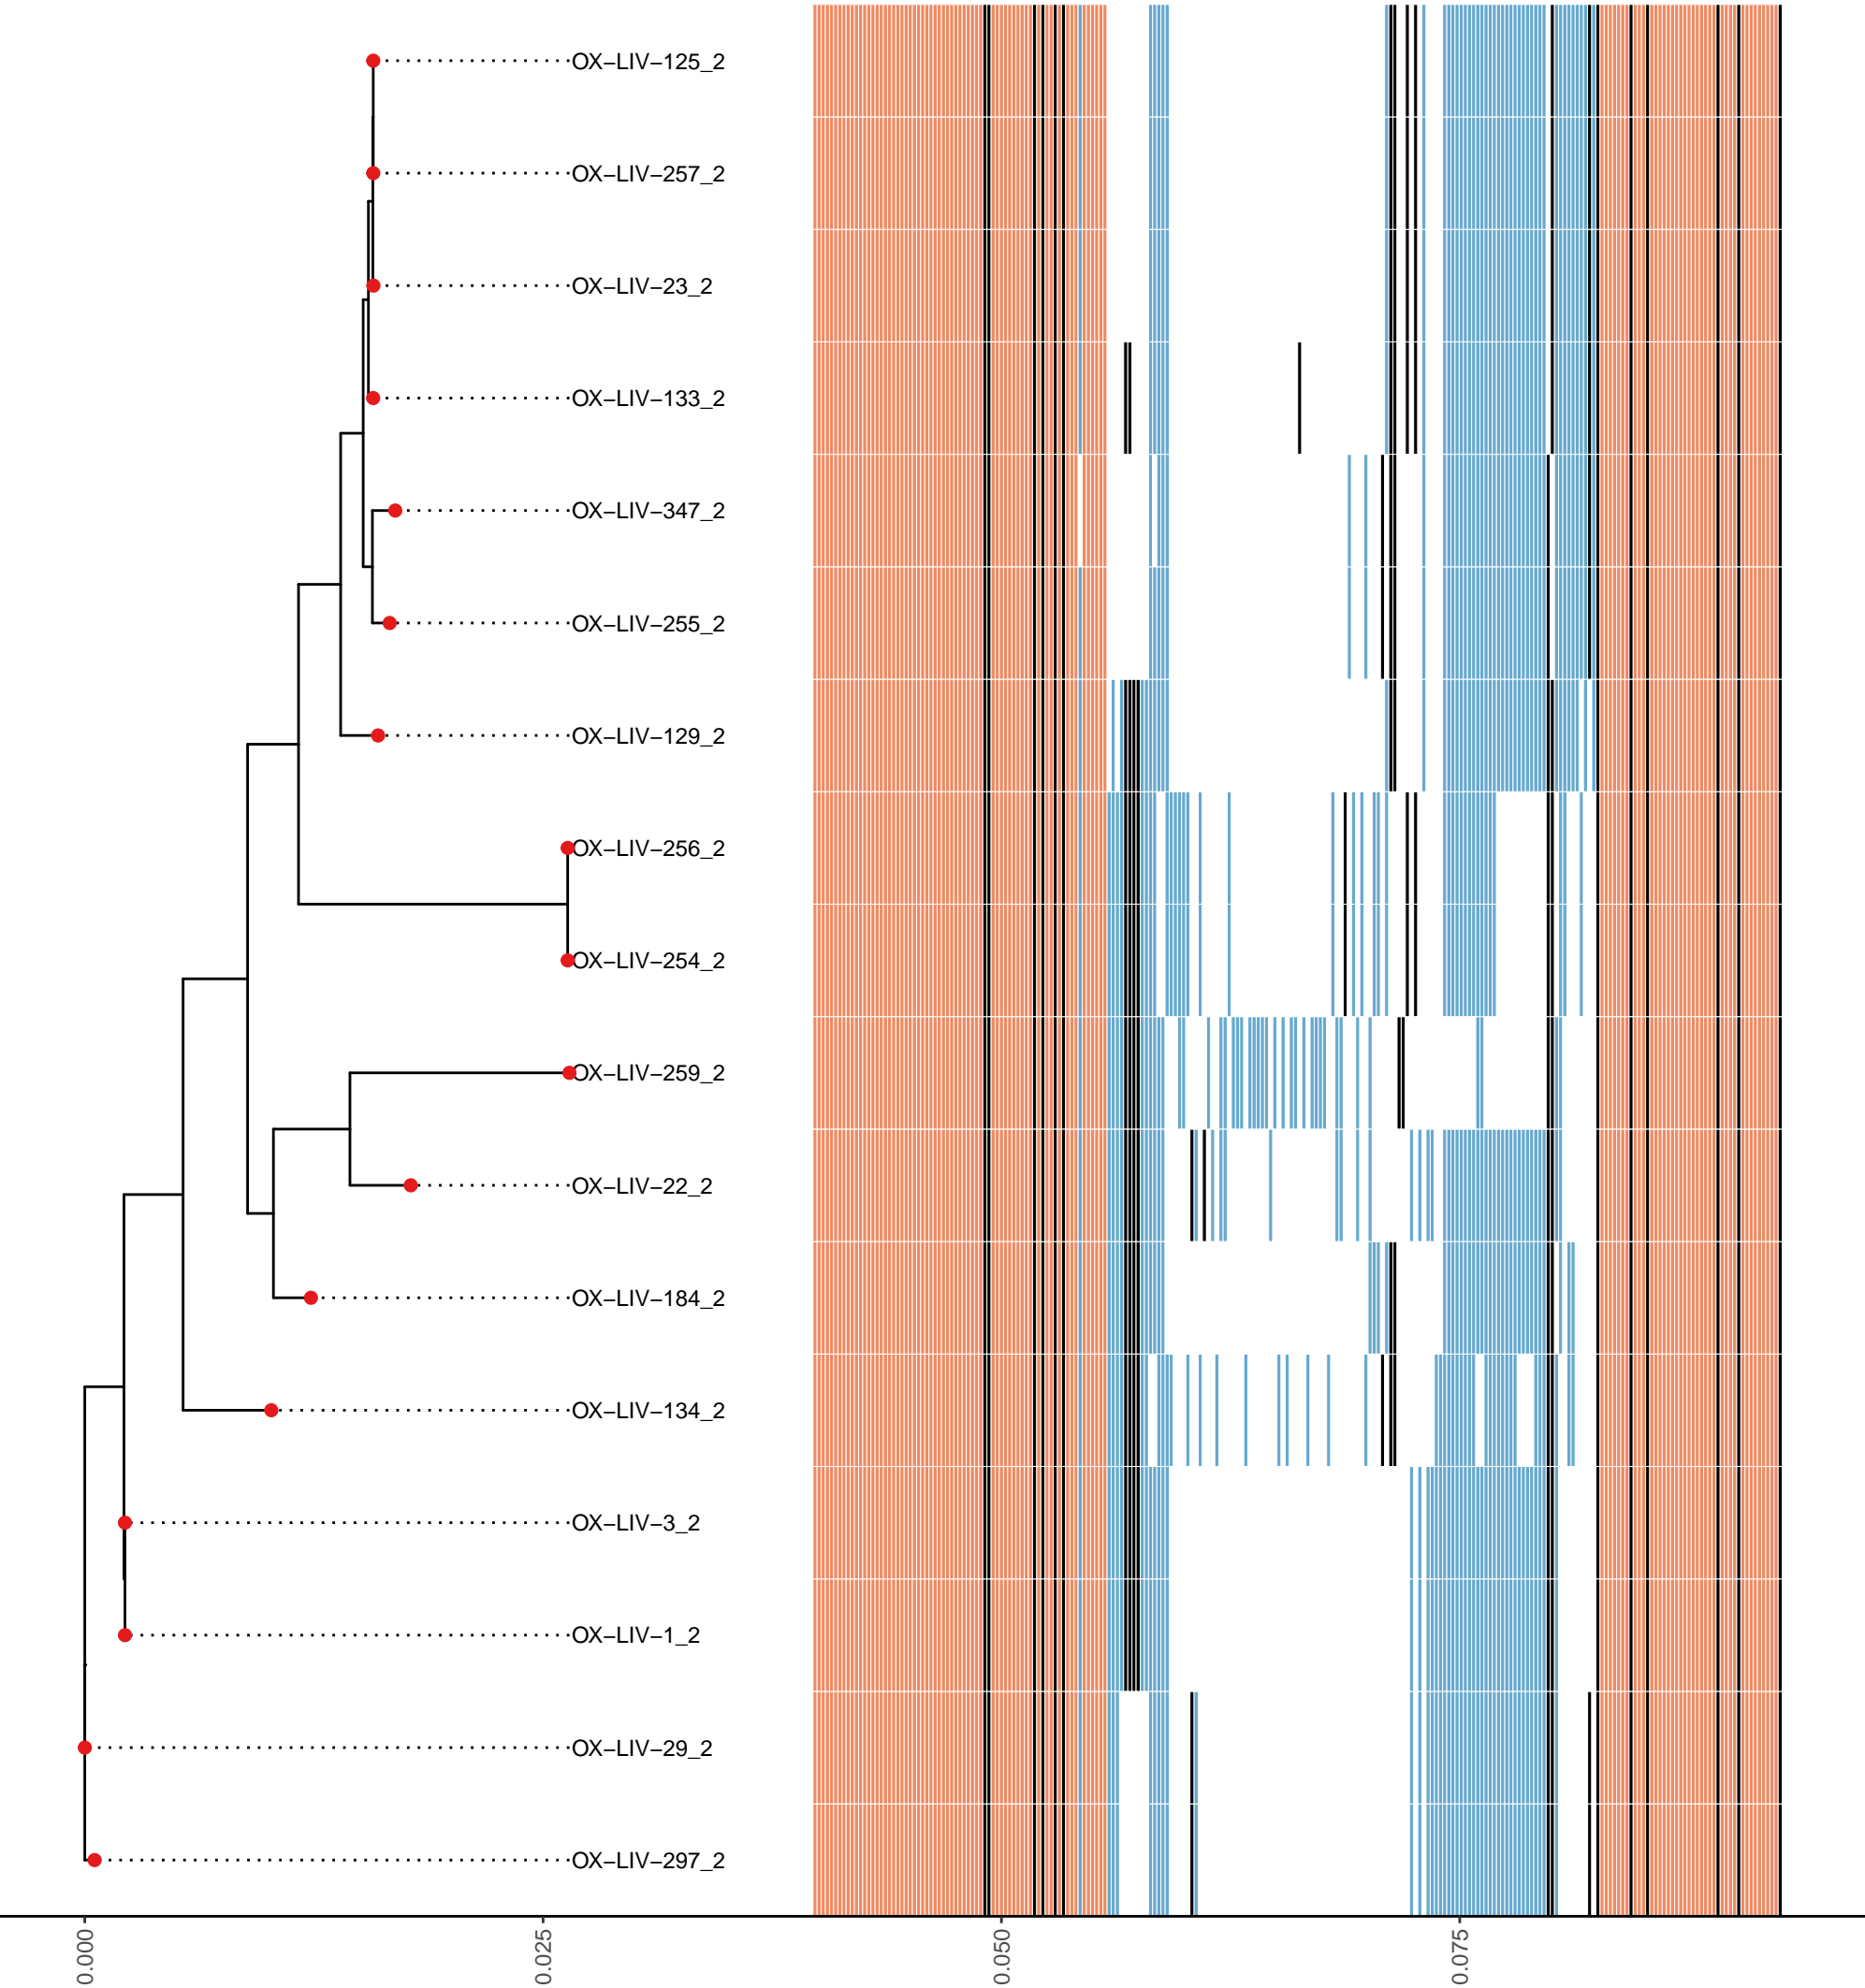

Gene type

- Absent
- Core
- Accessory
- Transposase

Compartment

- BSI
- Environmental
- Livestock
- WwTW

Cluster 37  
5 core genes  
0 accessory genes

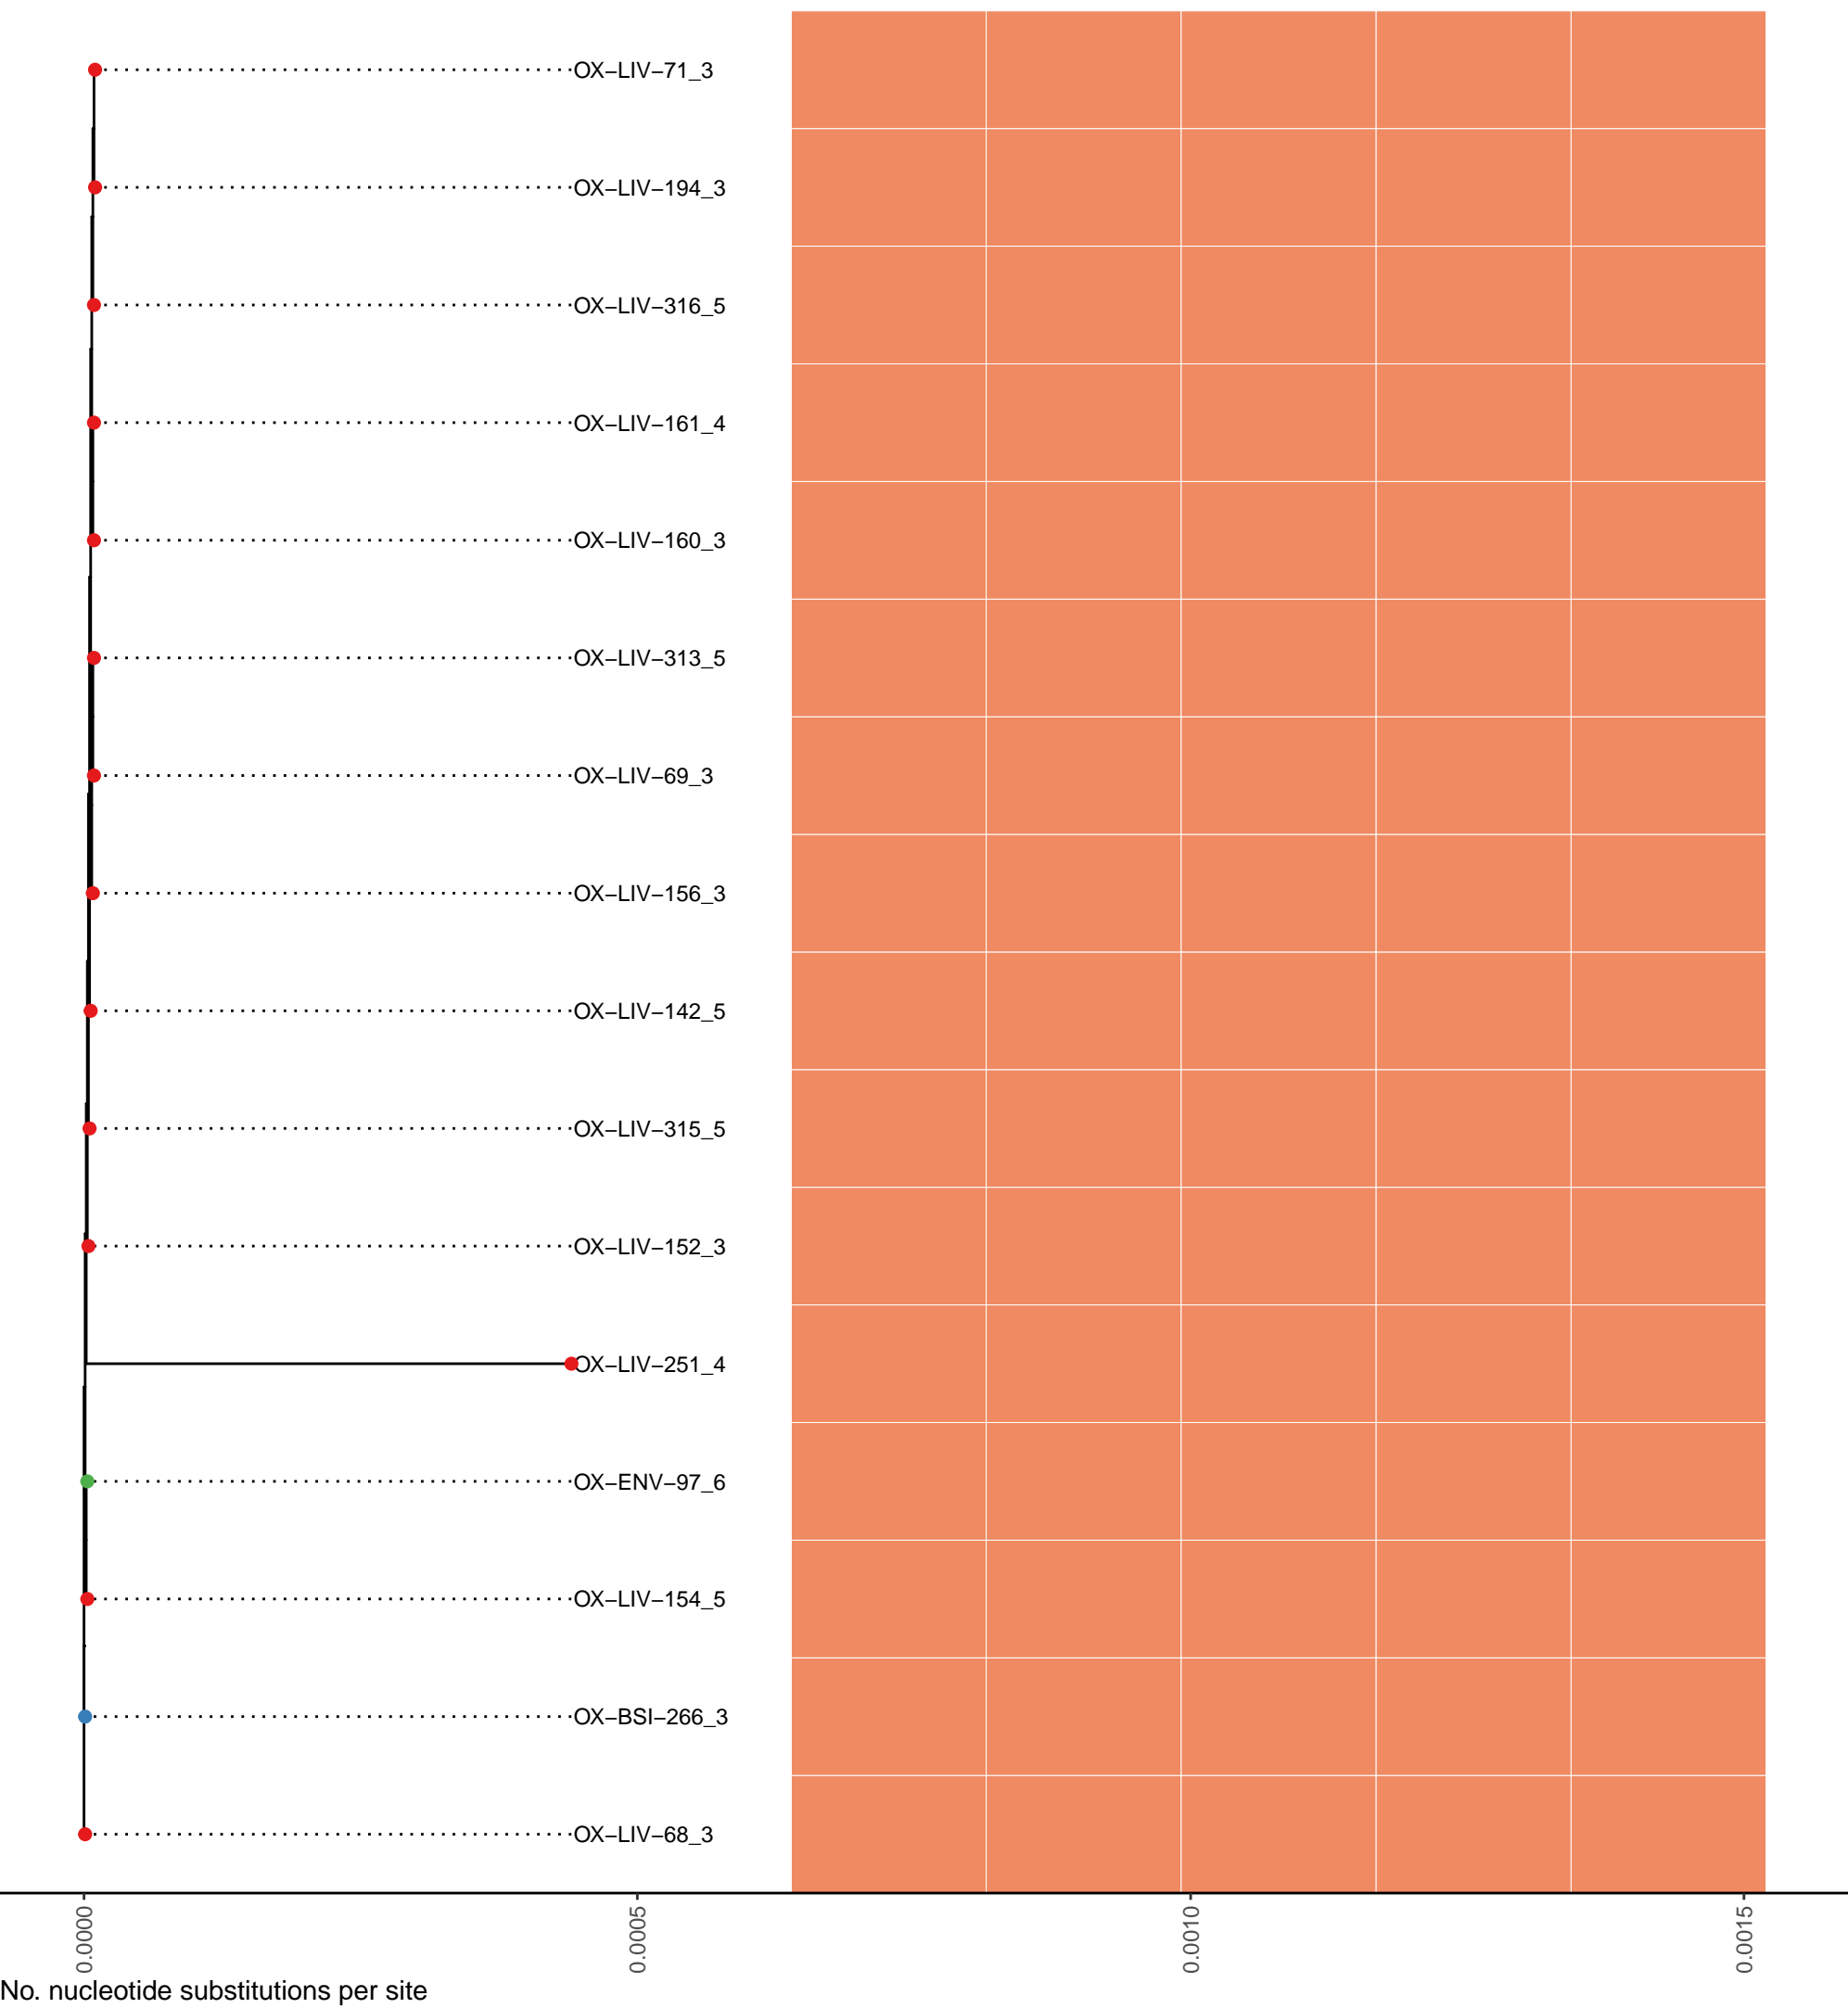

Gene type

- Absent
- Core
- Accessory
- Transposase

Compartment

- BSI
- Environmental
- Livestock
- WwTW

Cluster 38  
4 core genes  
14 accessory genes

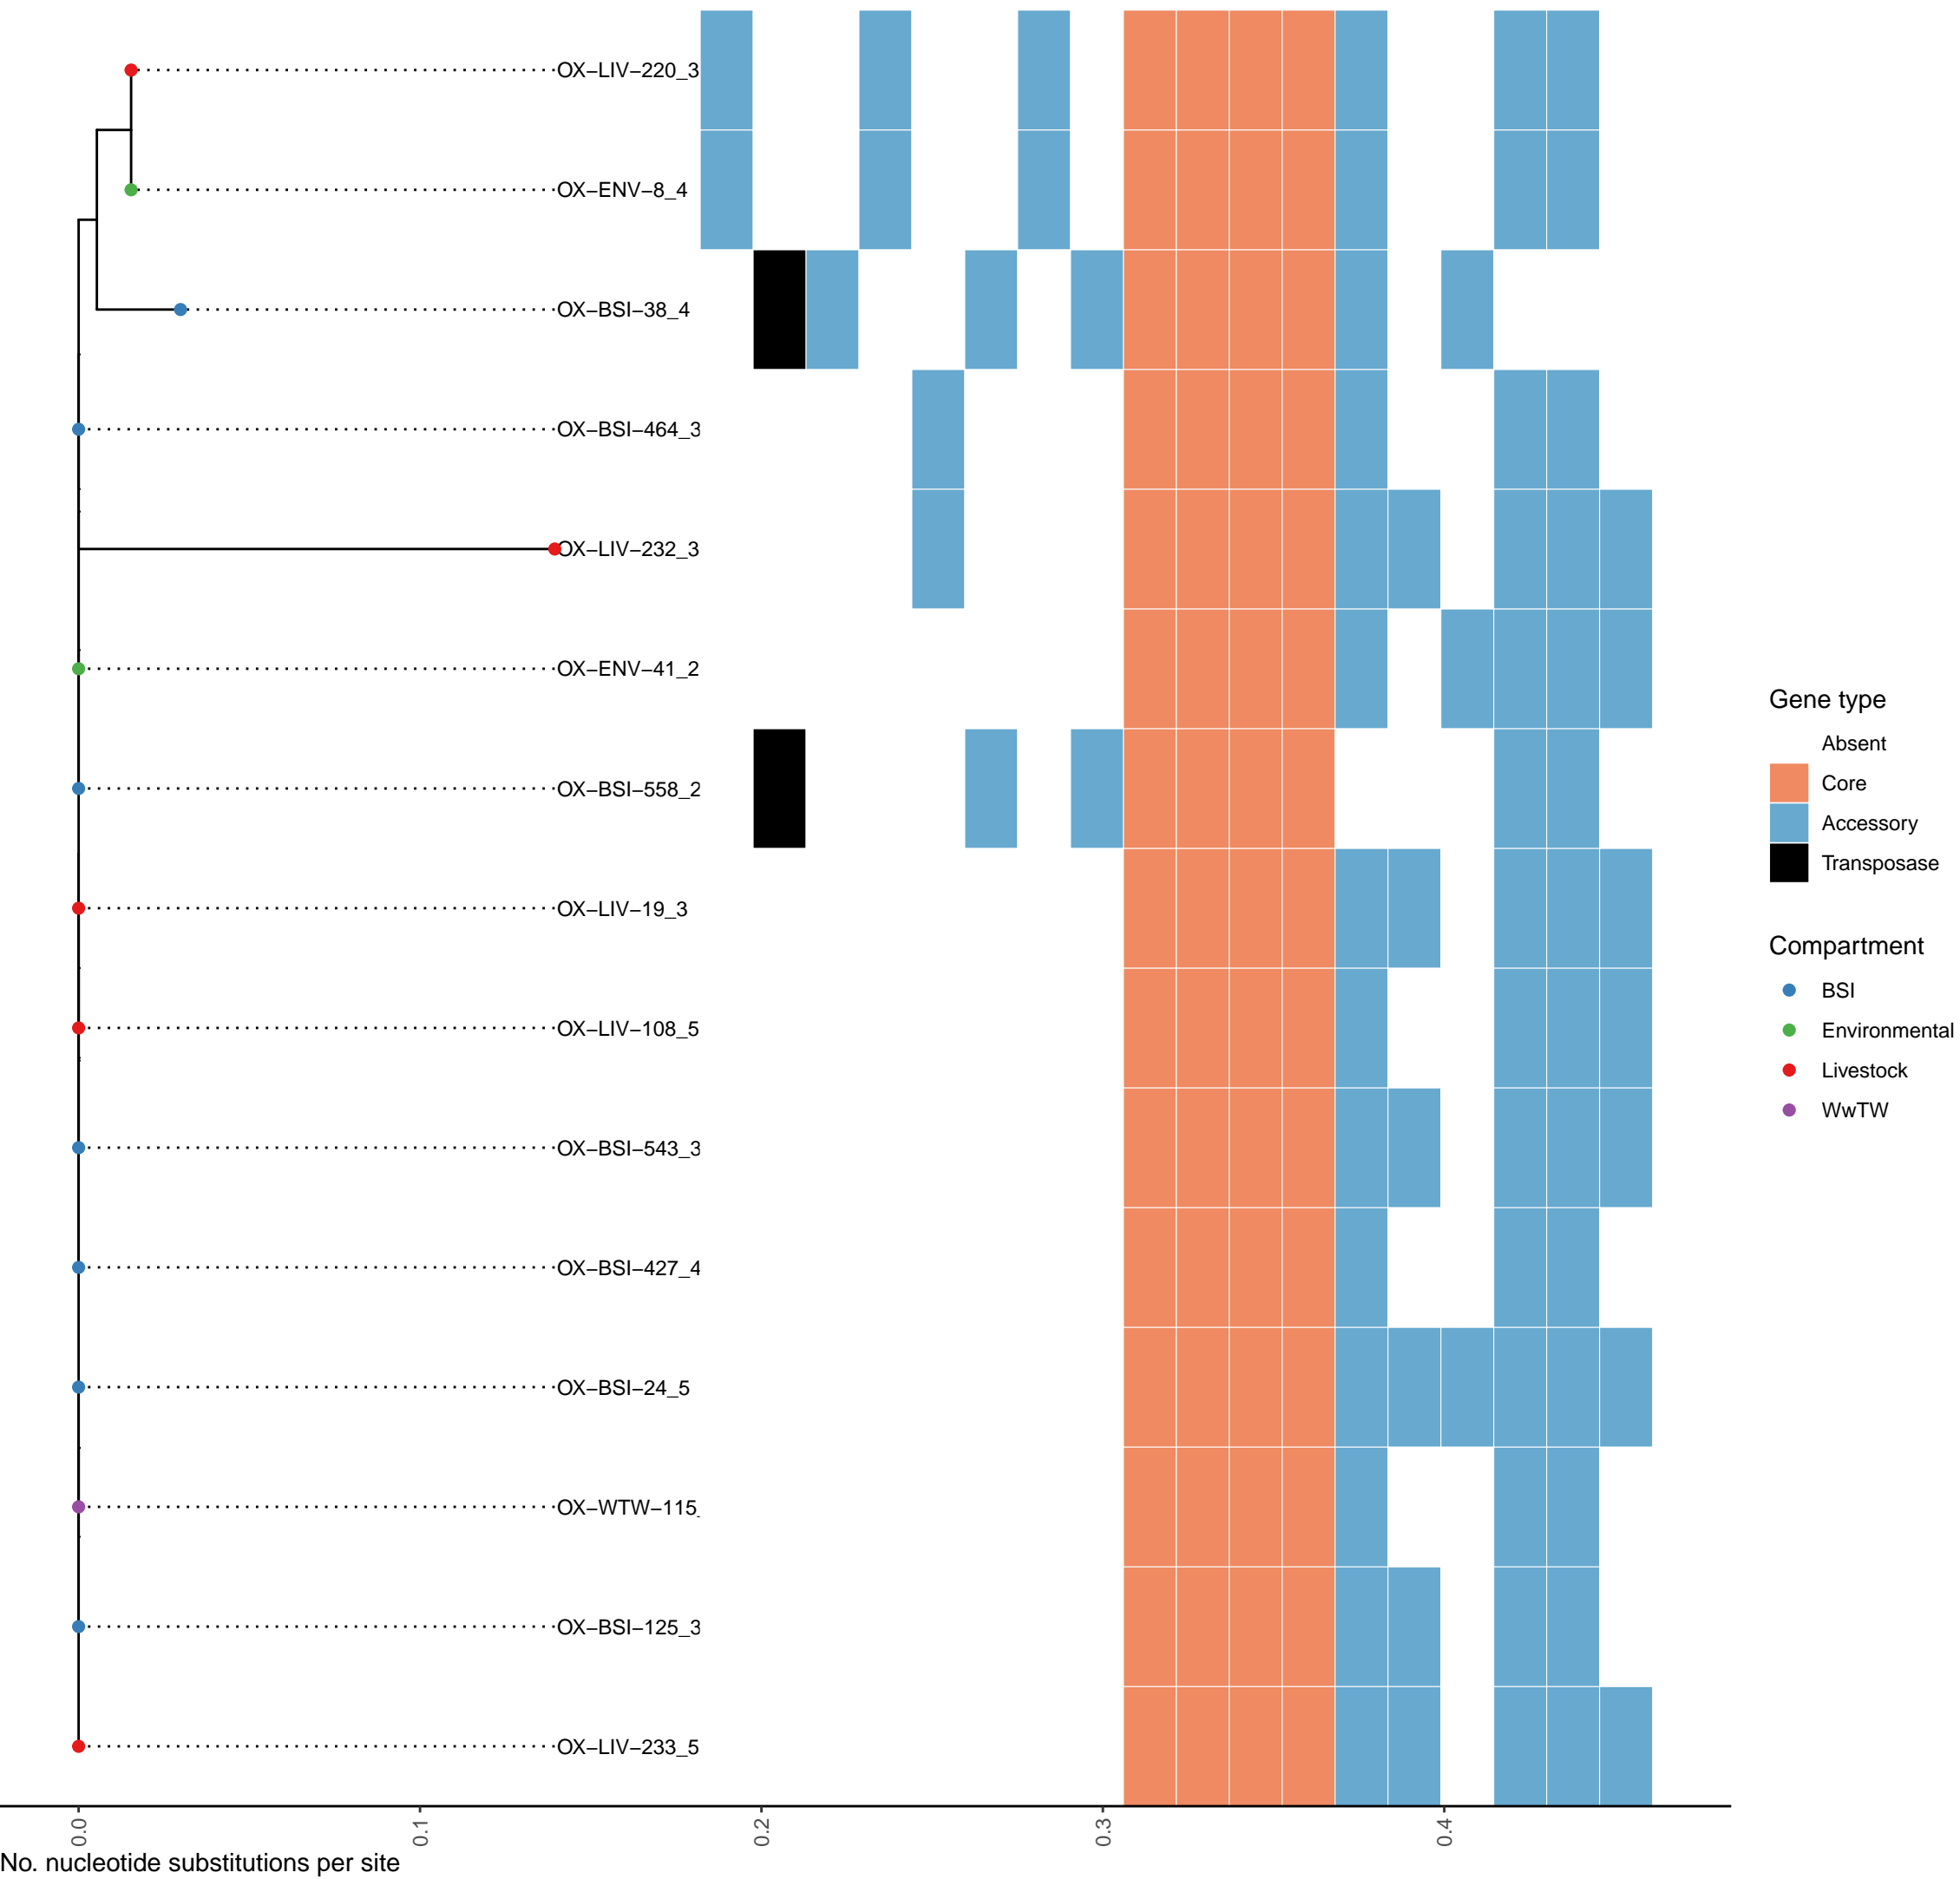

Cluster 39  
55 core genes  
50 accessory genes

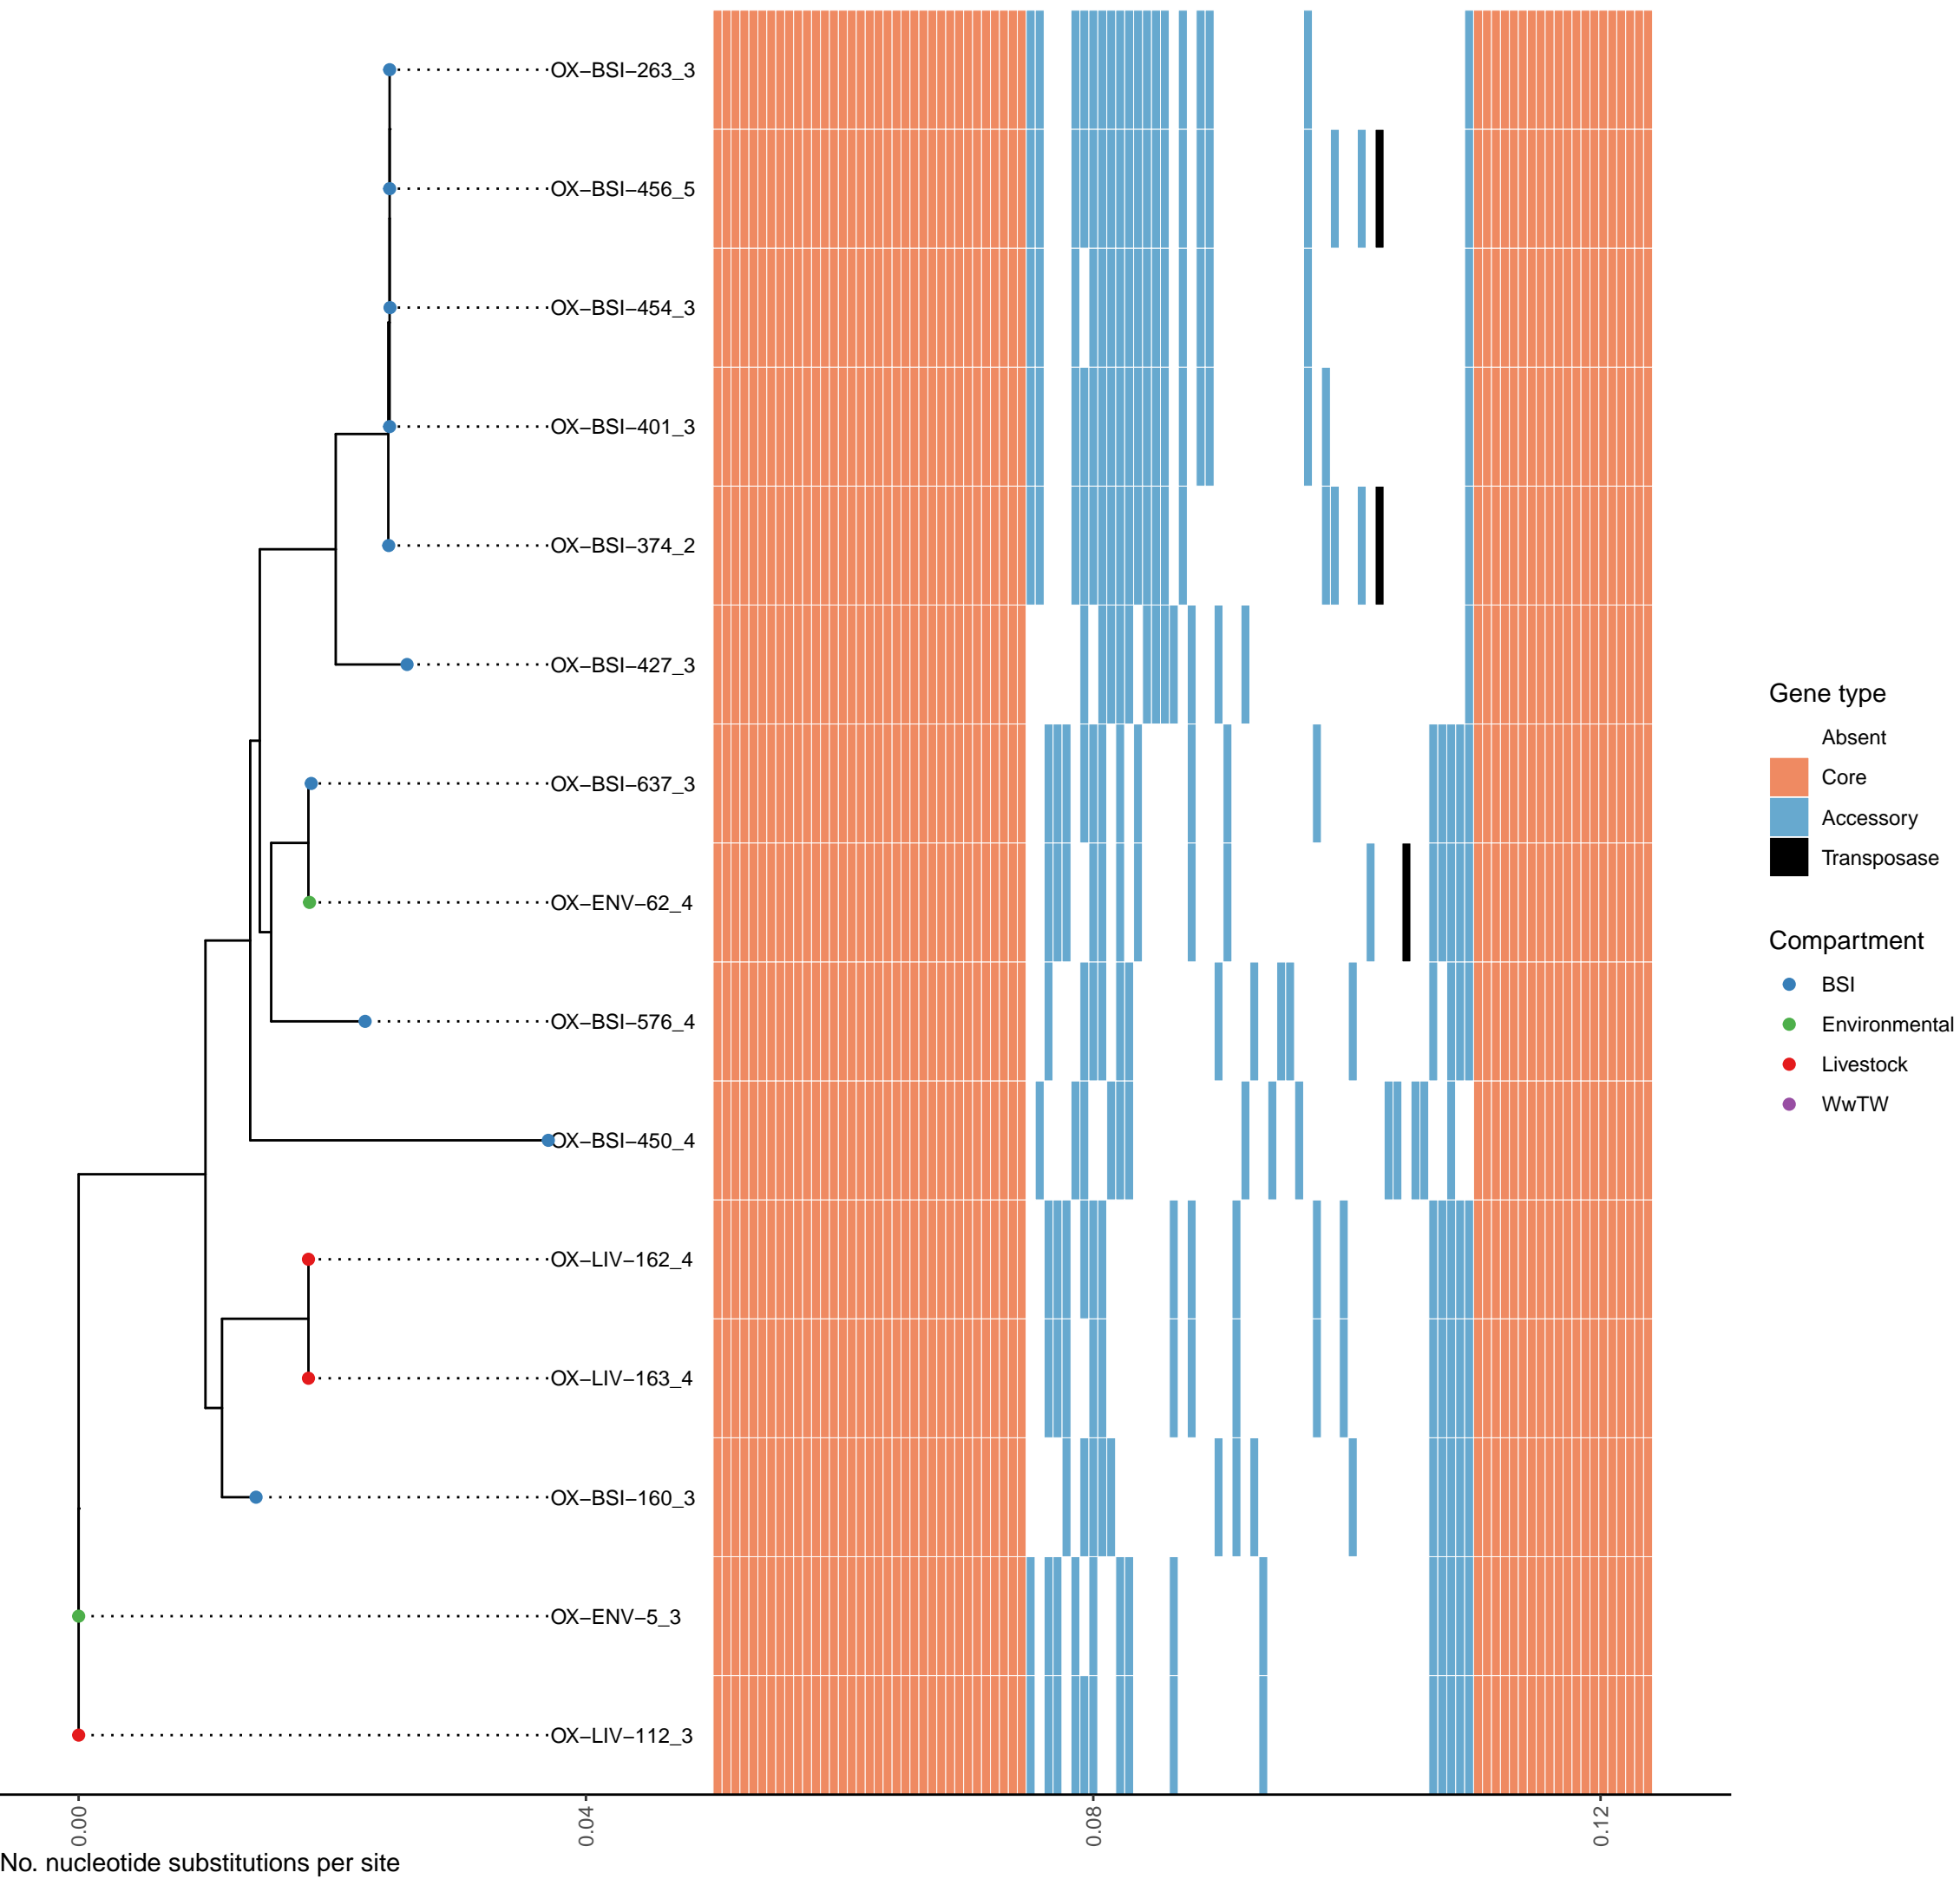

Cluster 41  
7 core genes  
3 accessory genes

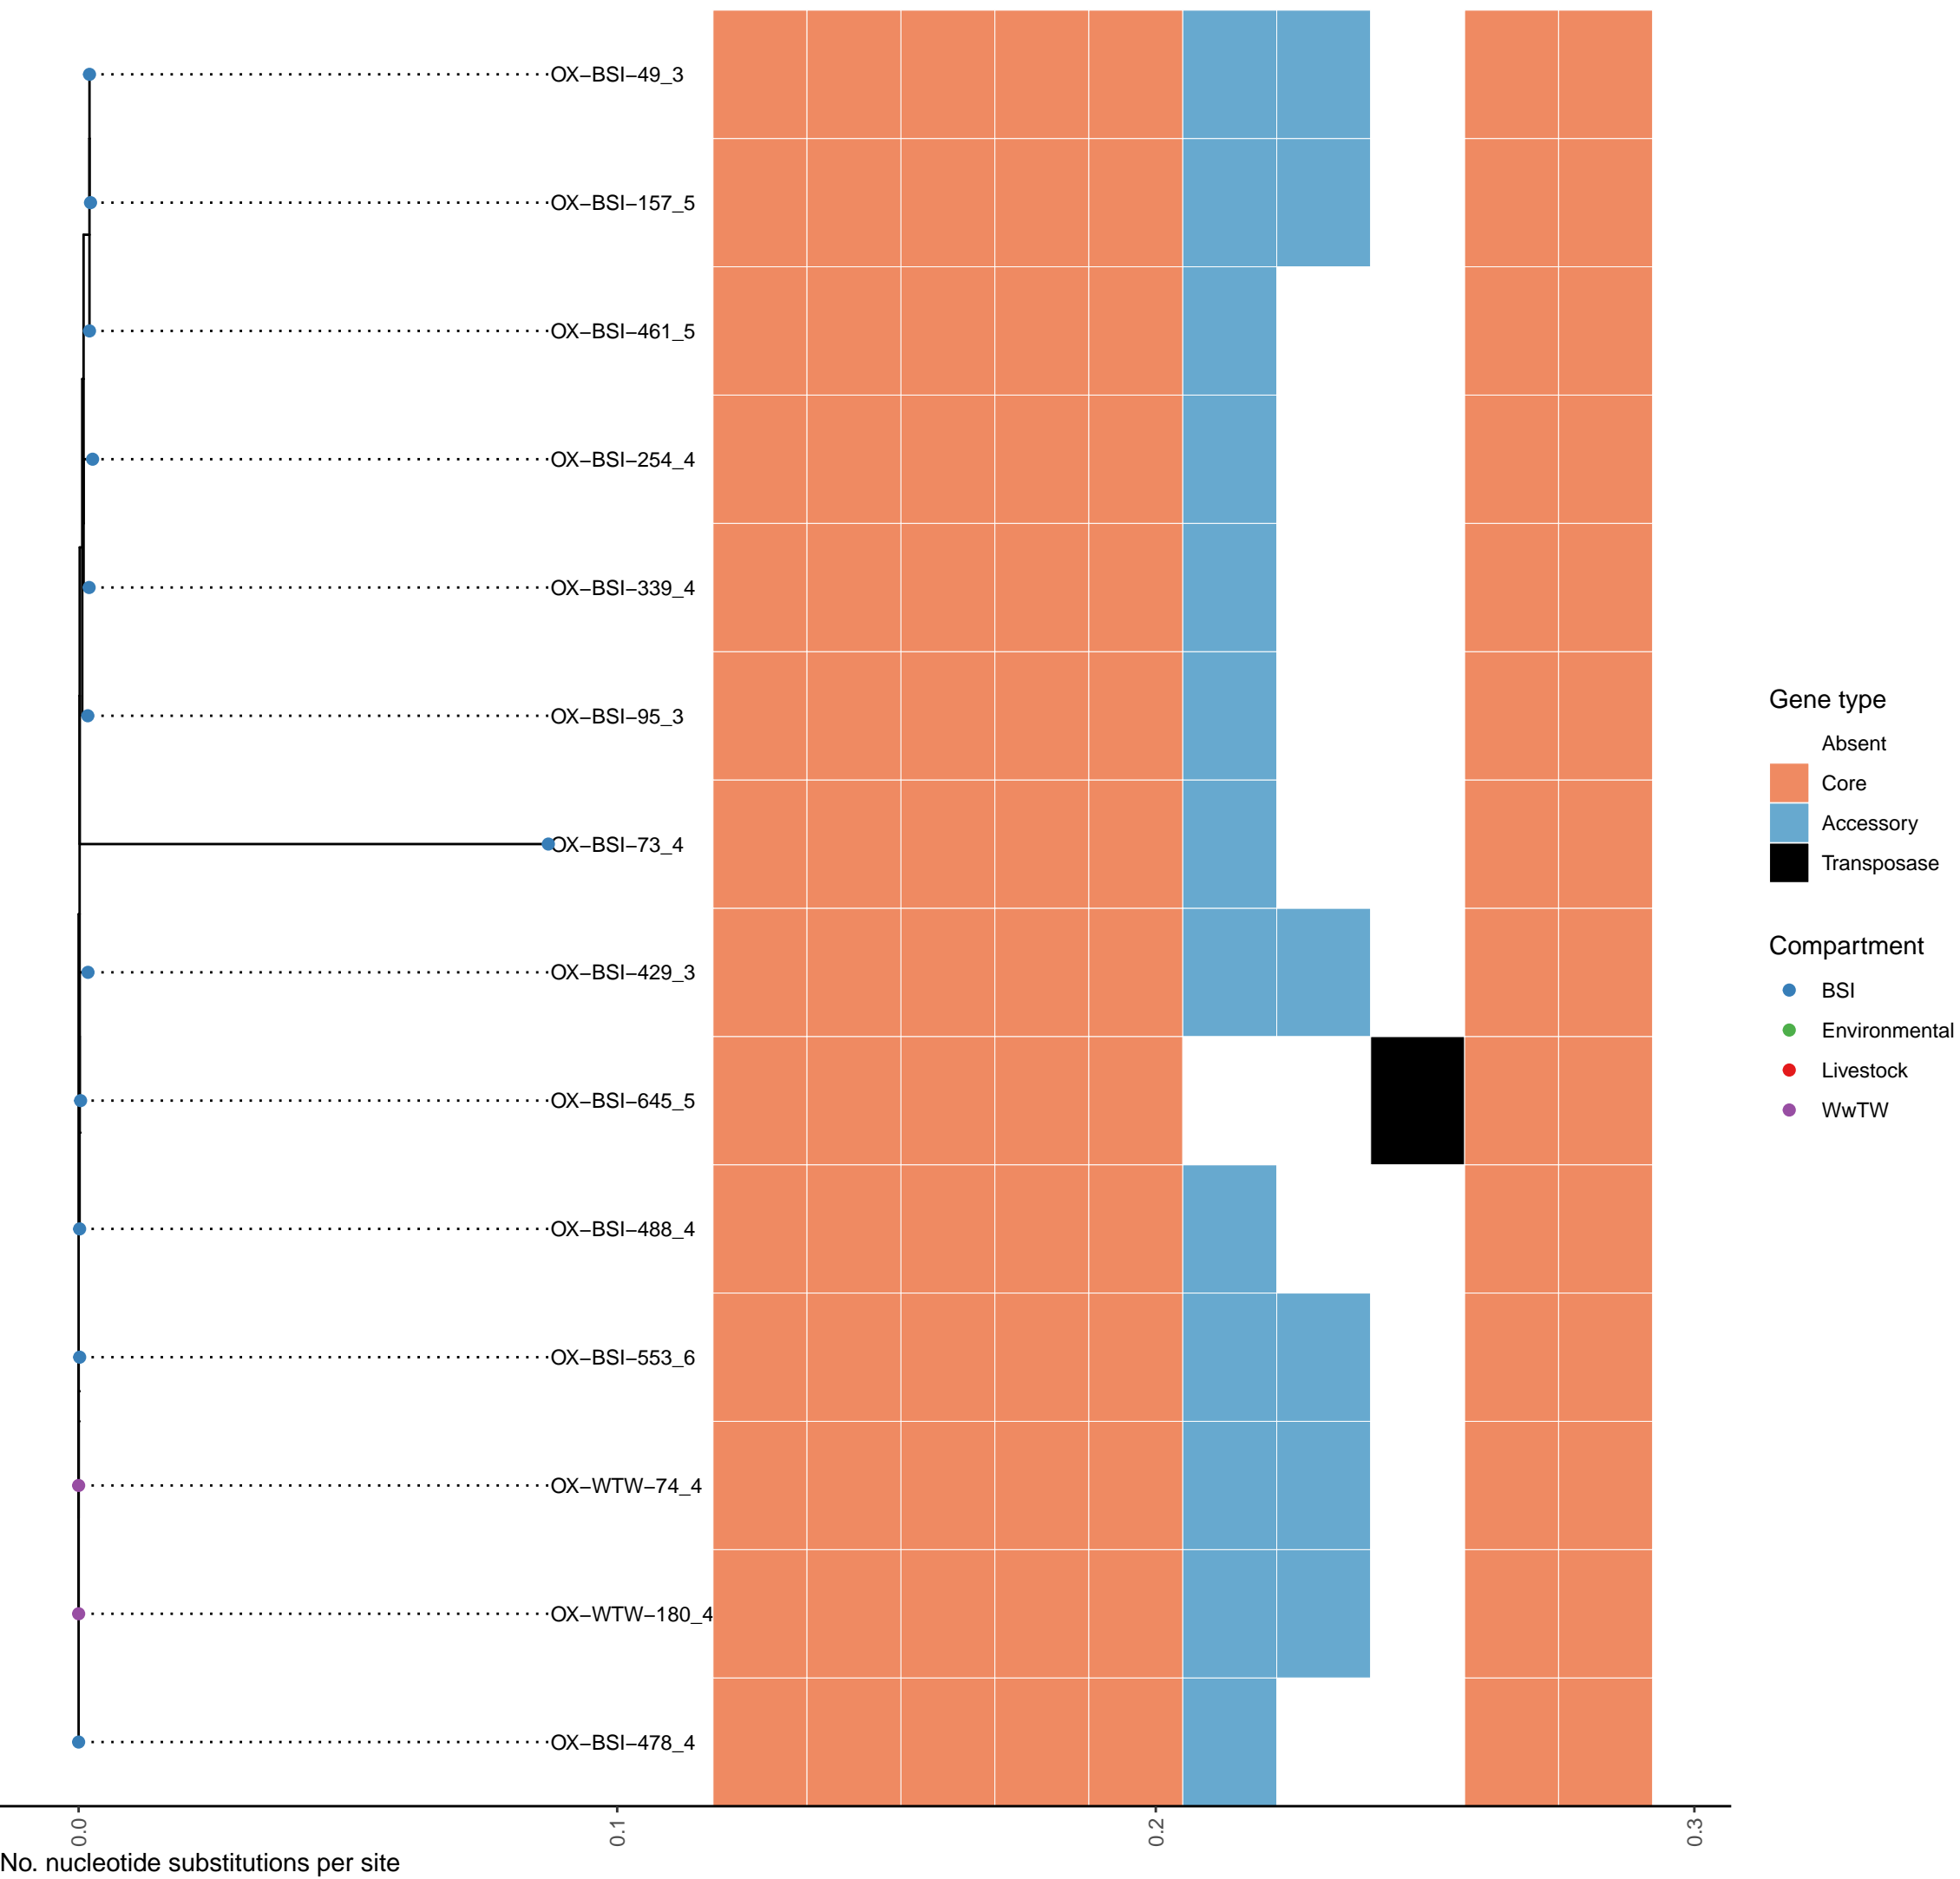

Cluster 42  
75 core genes  
131 accessory genes

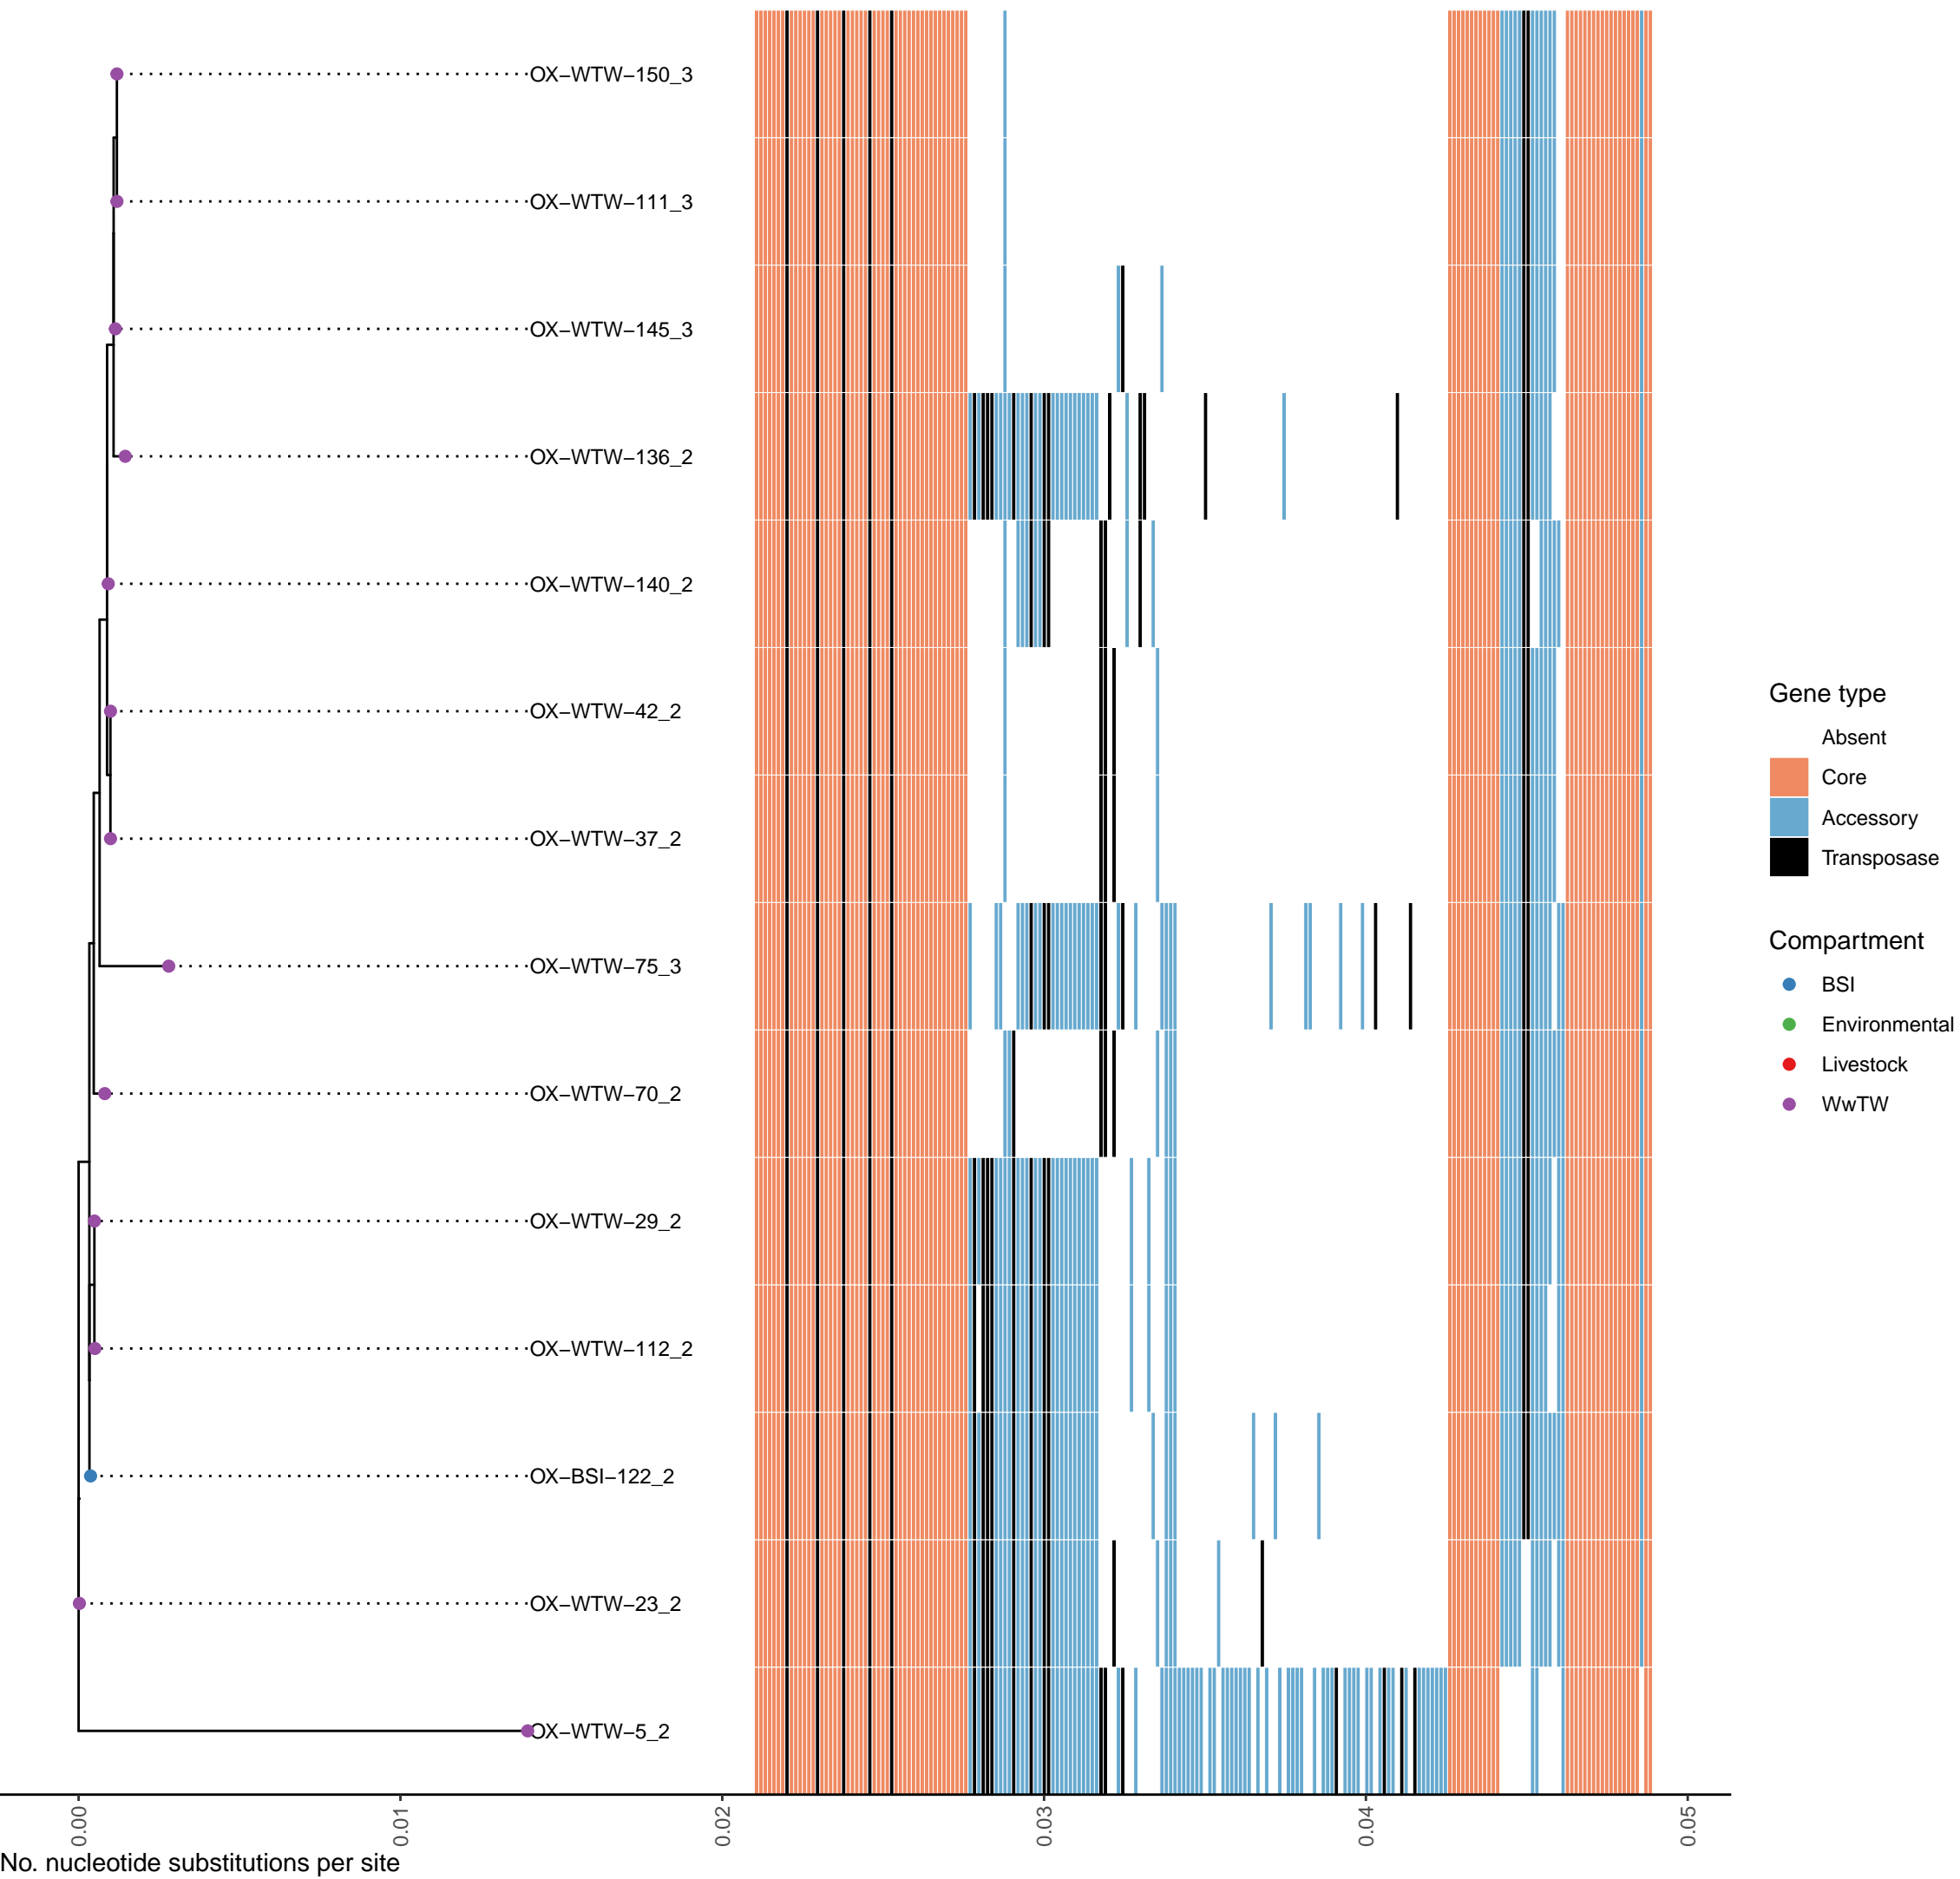

Cluster 43  
22 core genes  
80 accessory genes

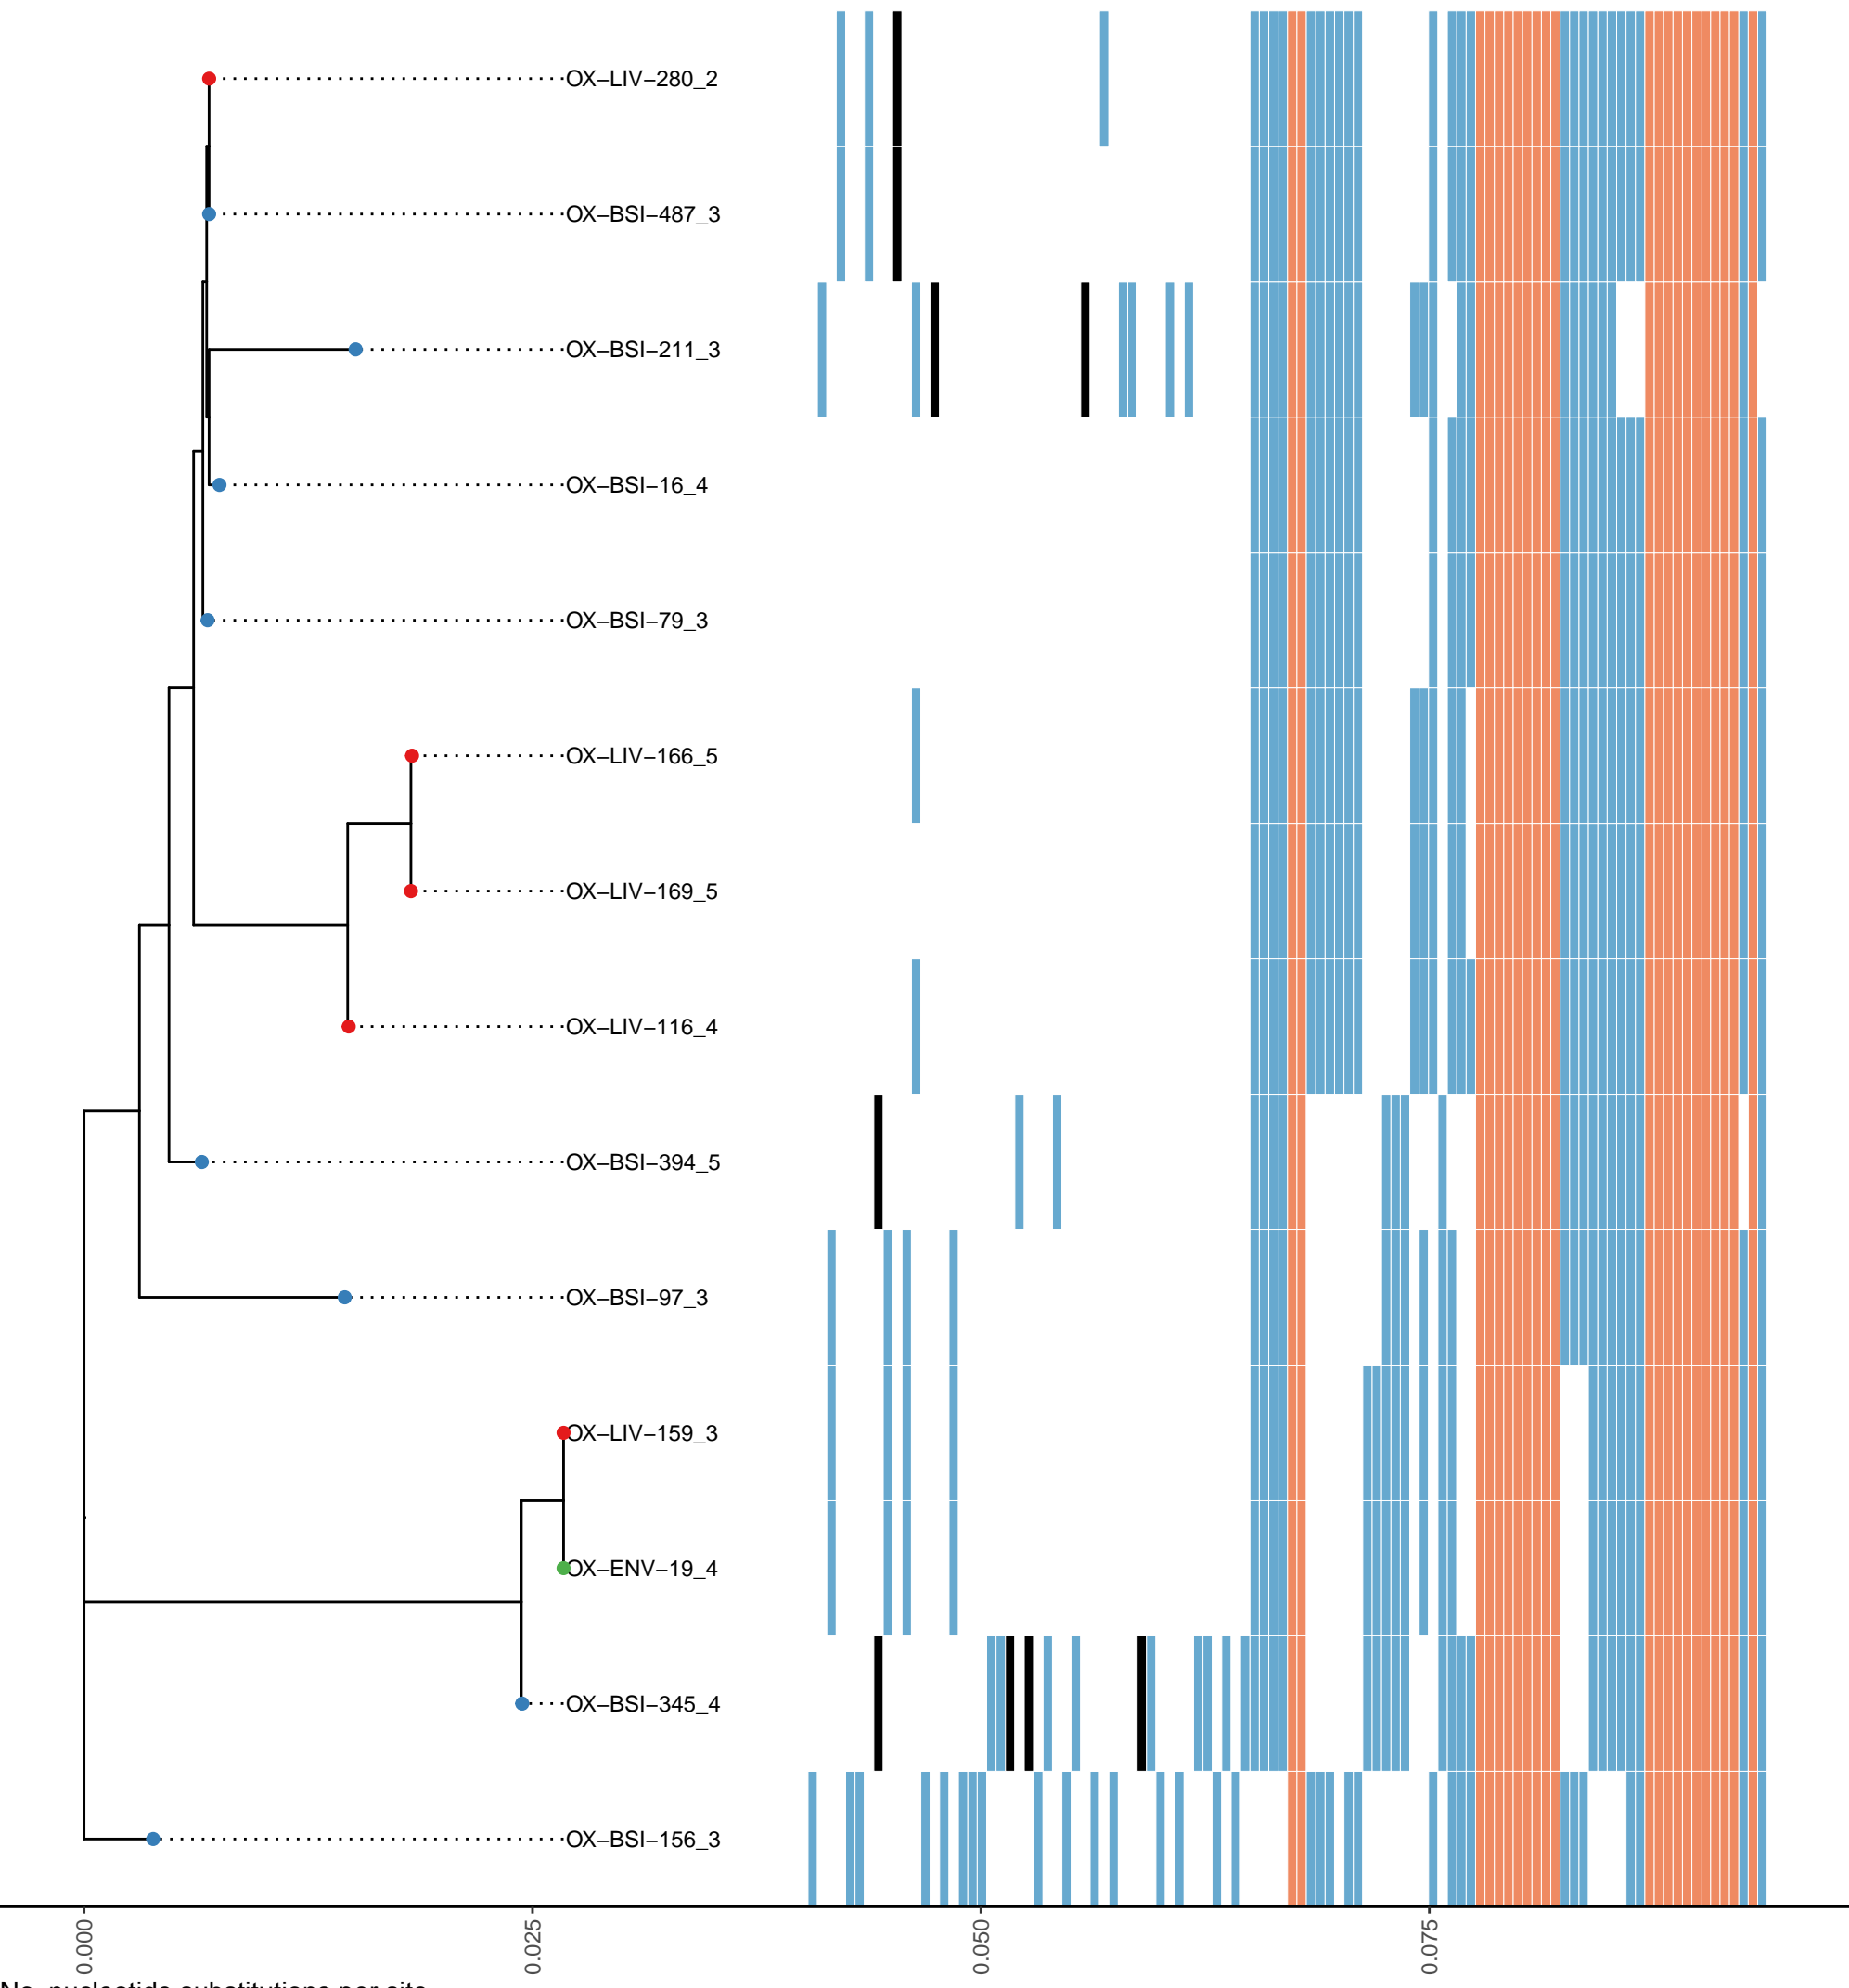

Gene type

- Absent
- Core
- Accessory
- Transposase

Compartment

- BSI
- Environmental
- Livestock
- WwTW

Cluster 44  
8 core genes  
10 accessory genes

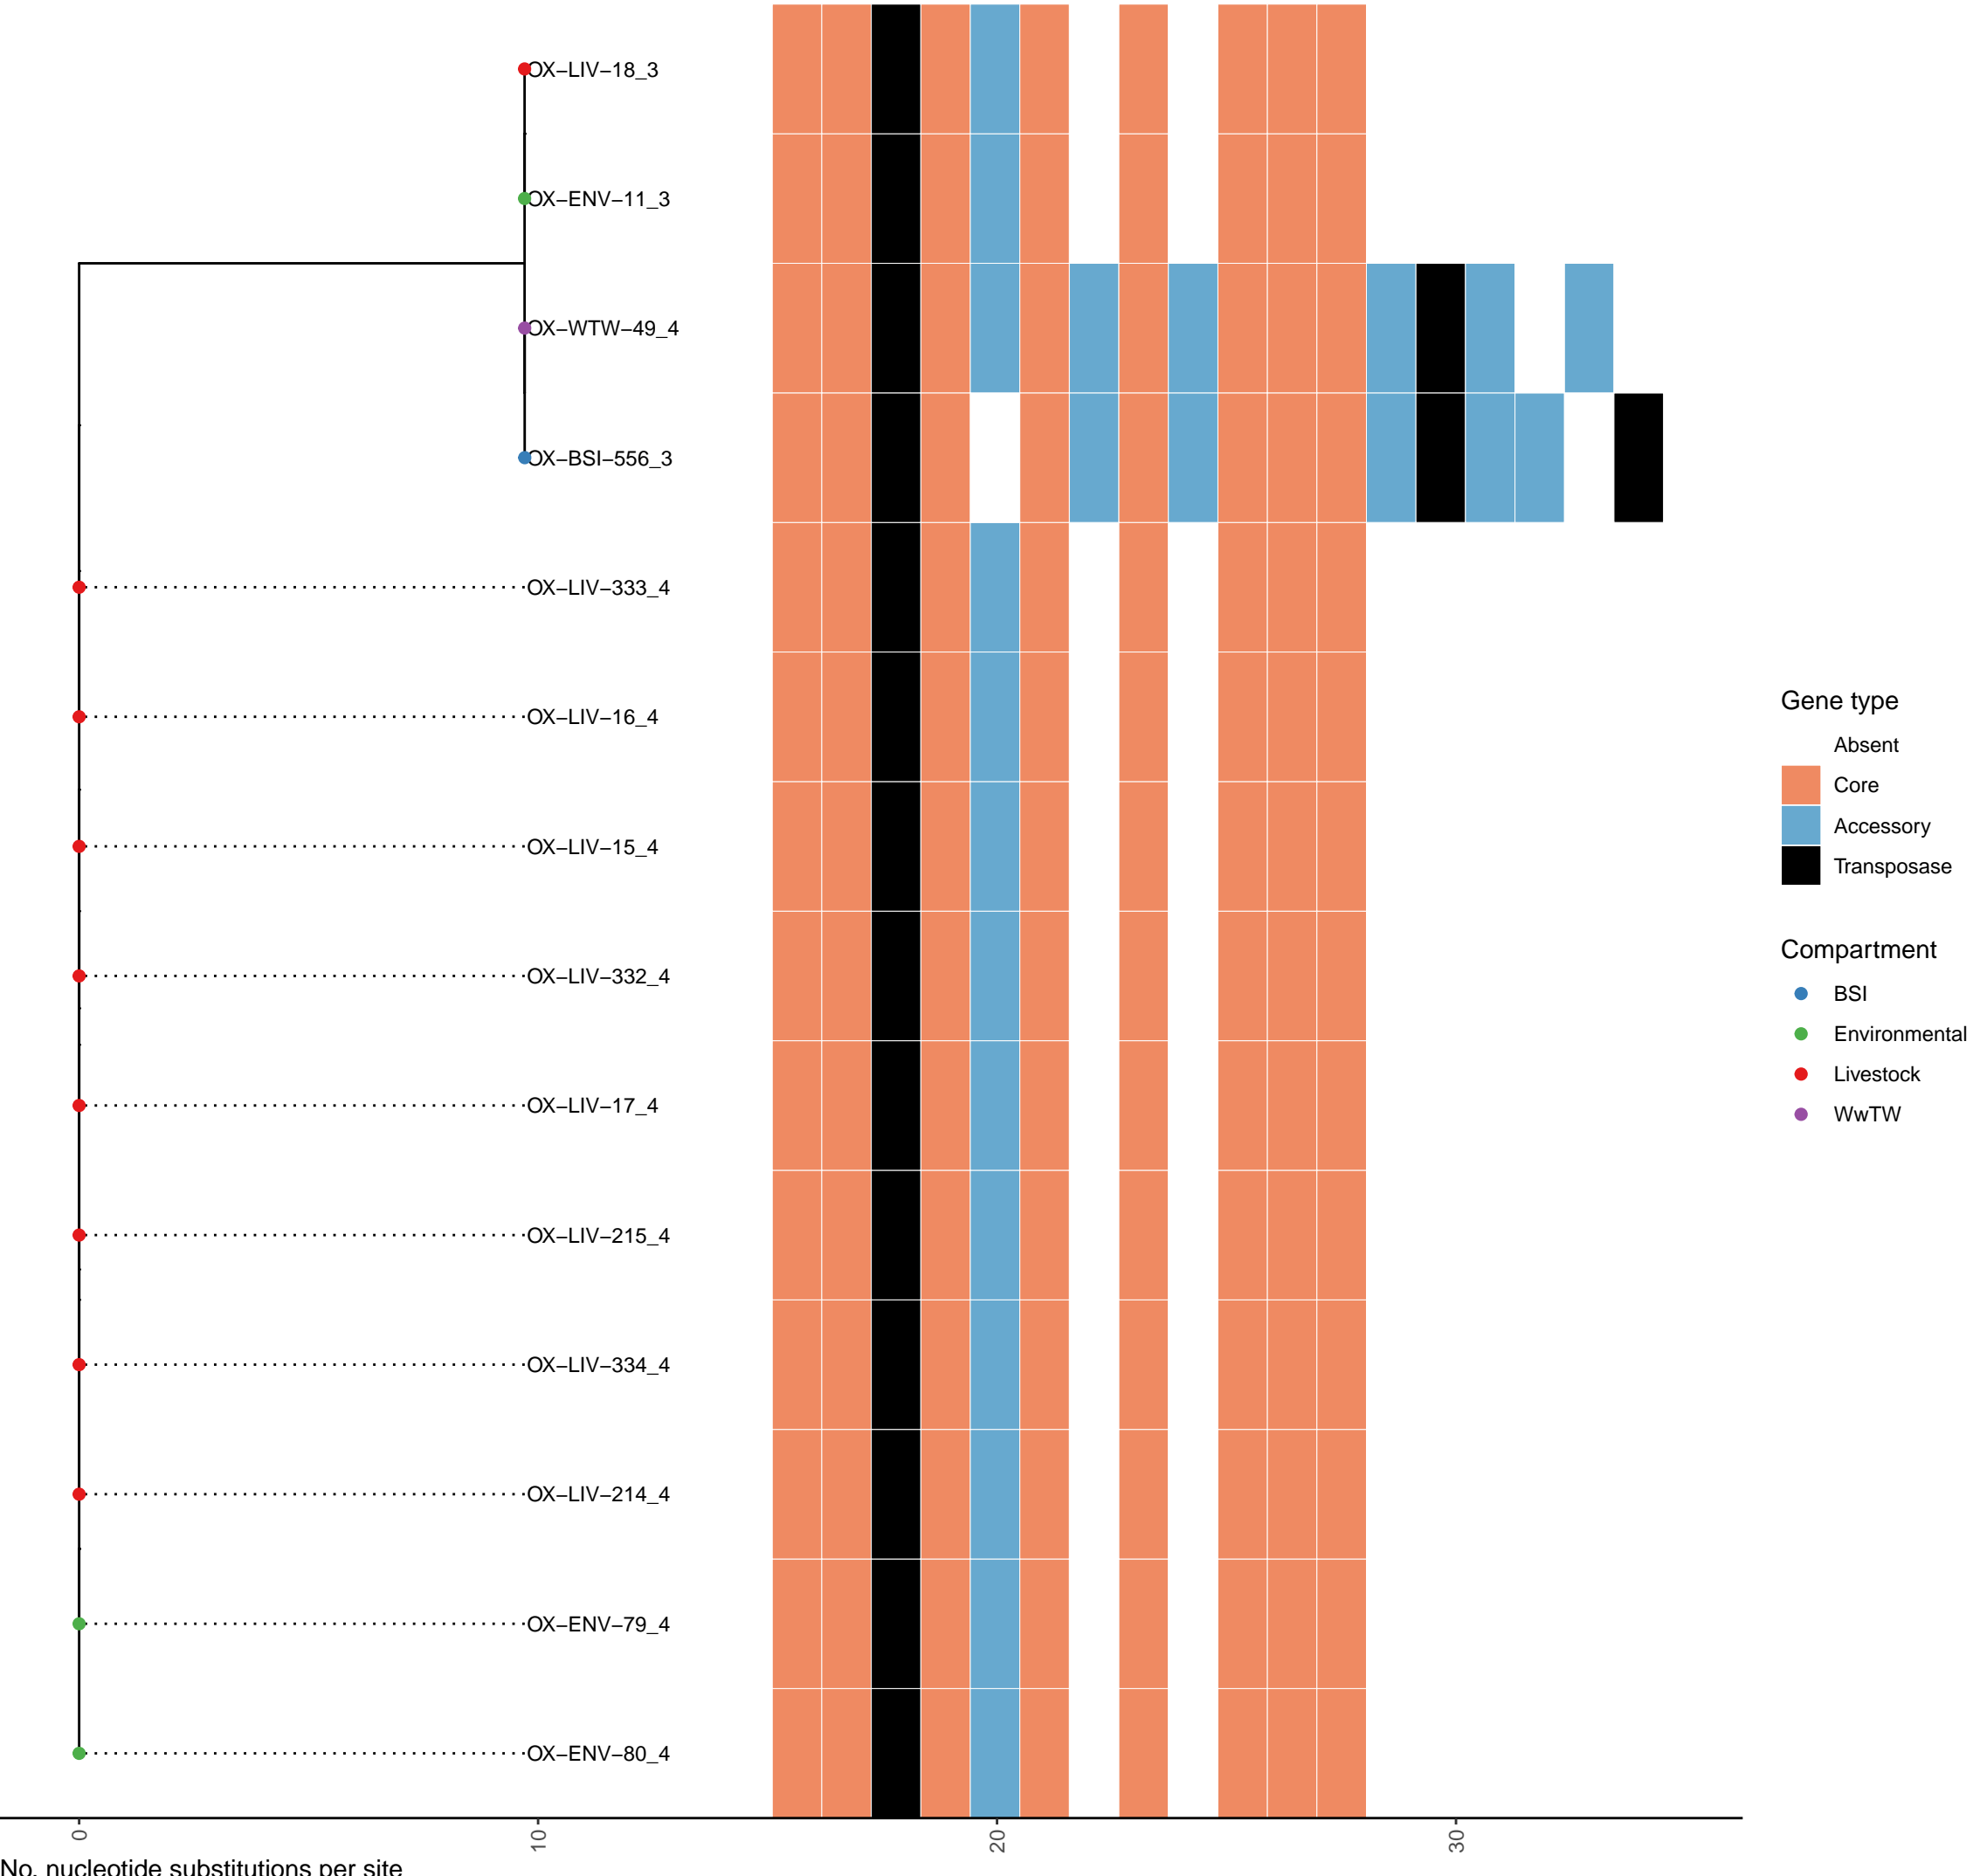

Cluster 45  
3 core genes  
1 accessory genes

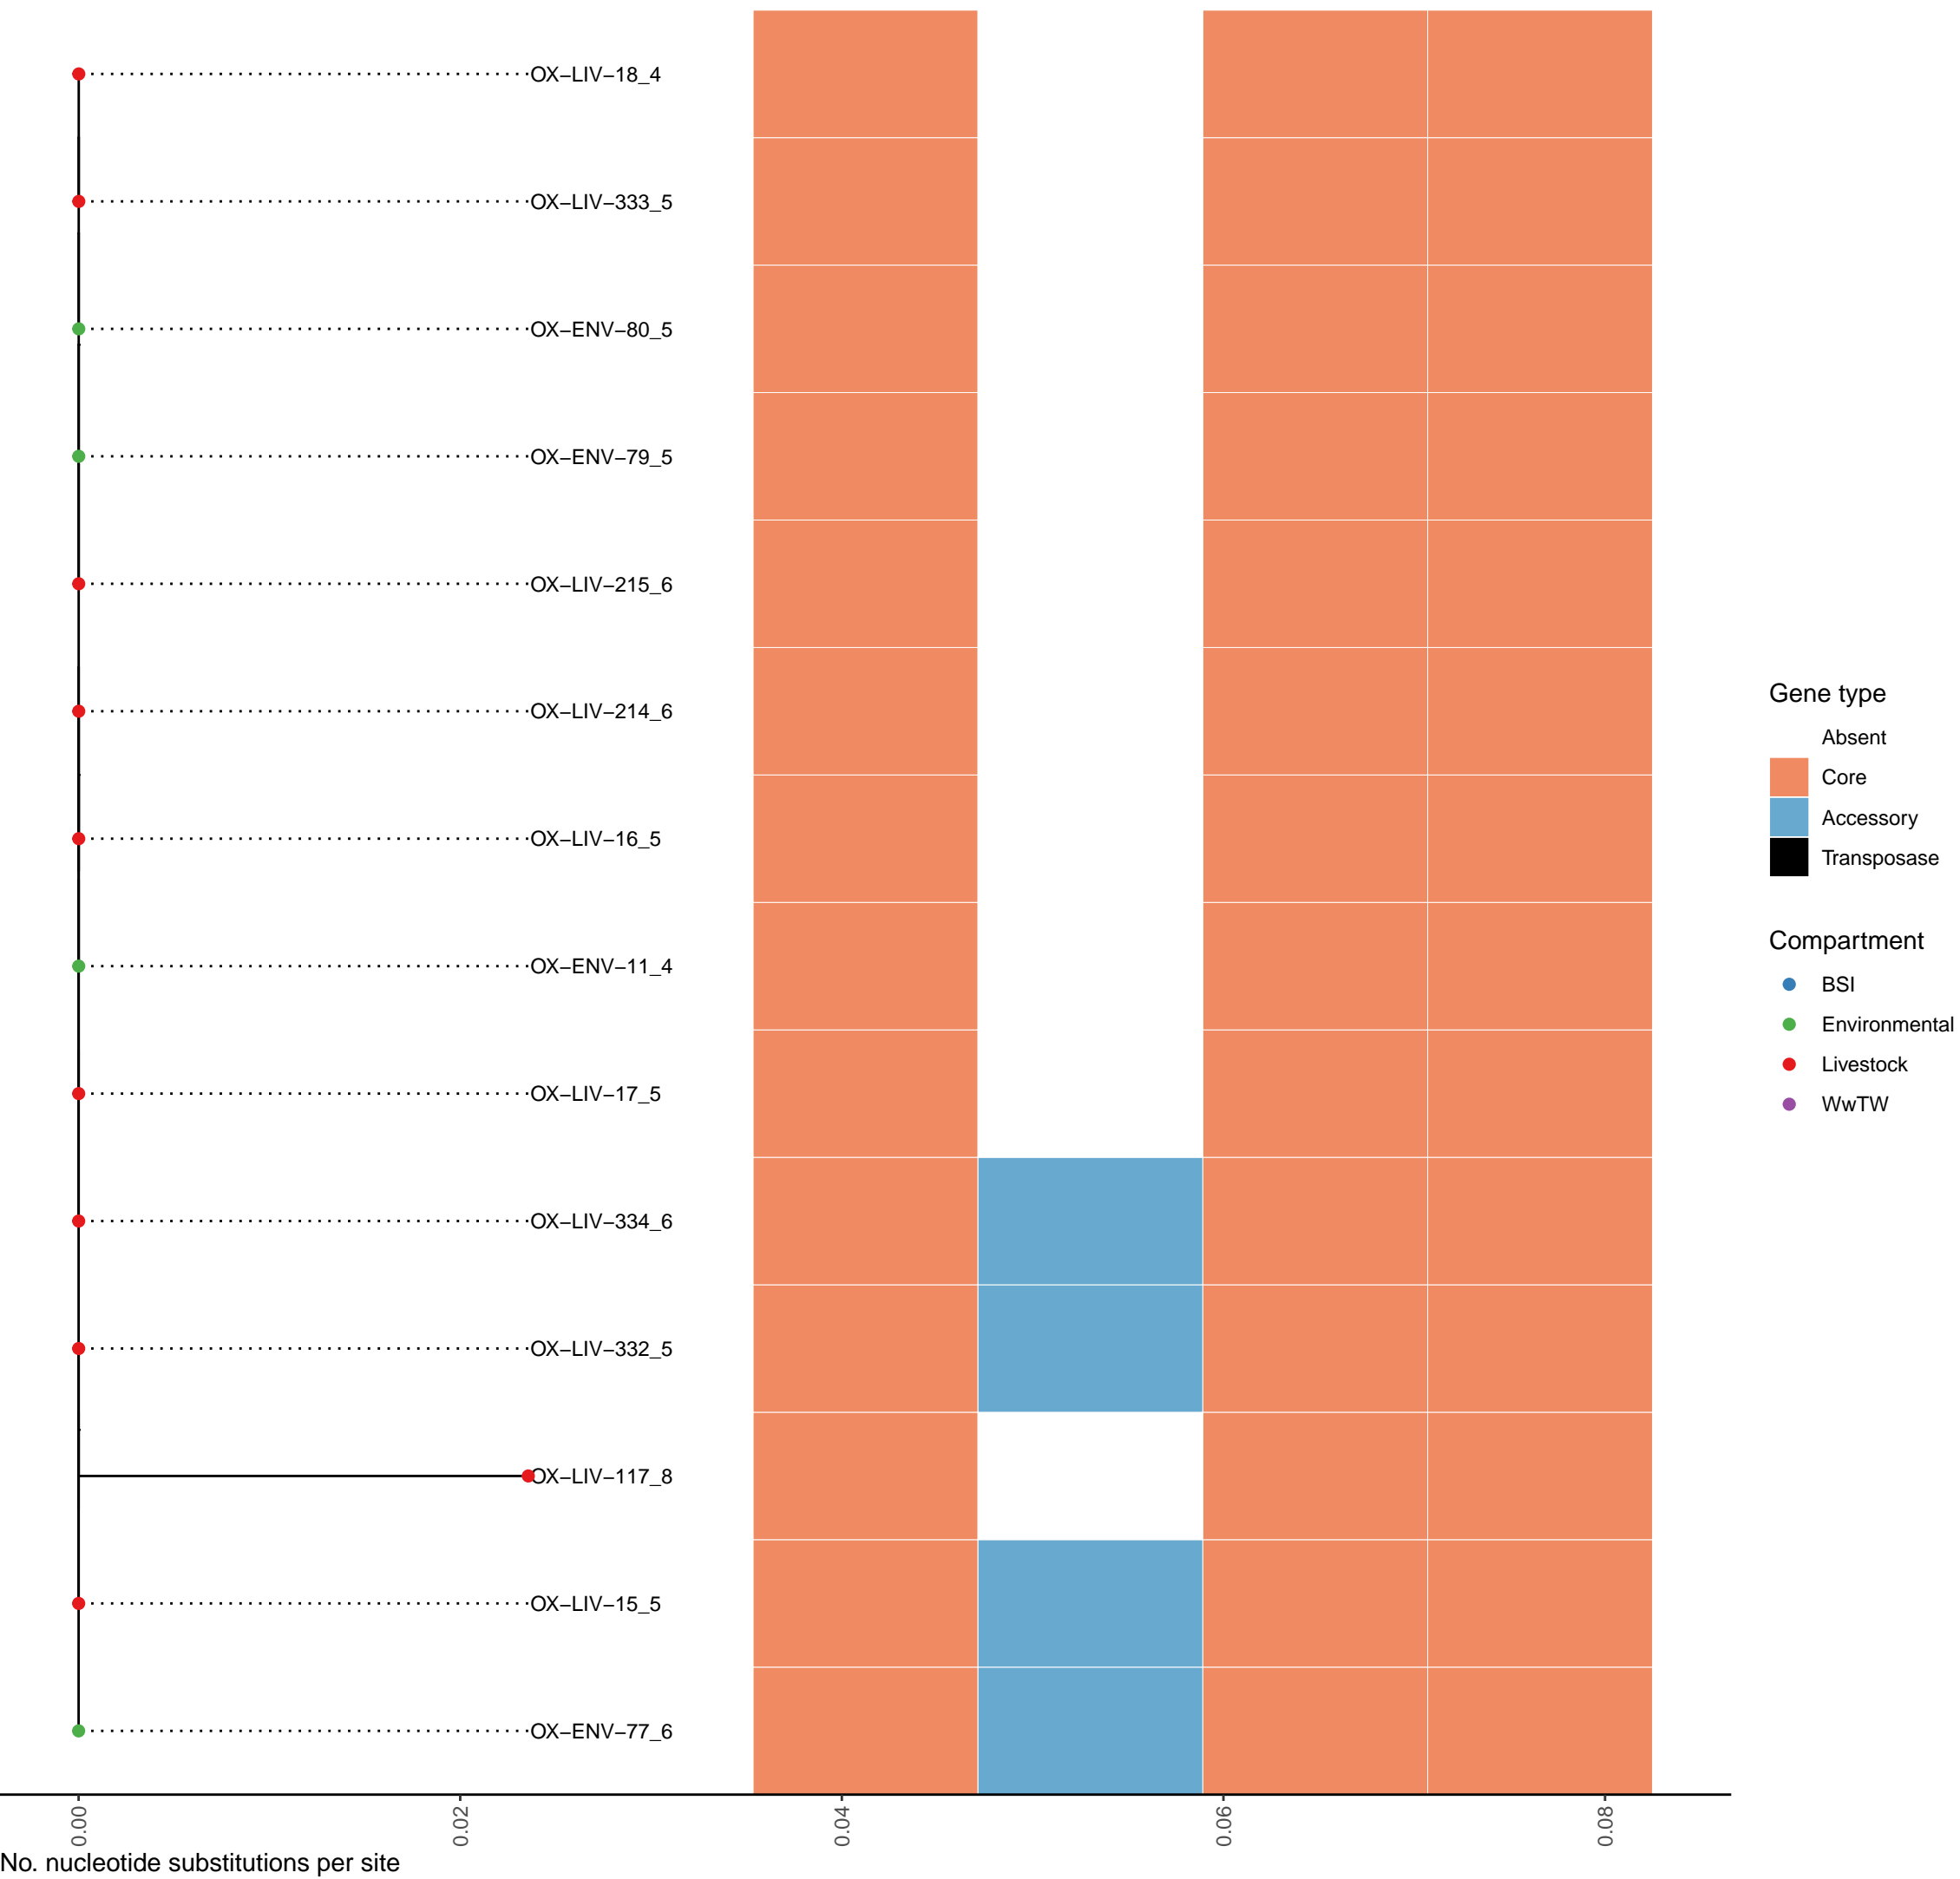

Cluster 46  
9 core genes  
0 accessory genes

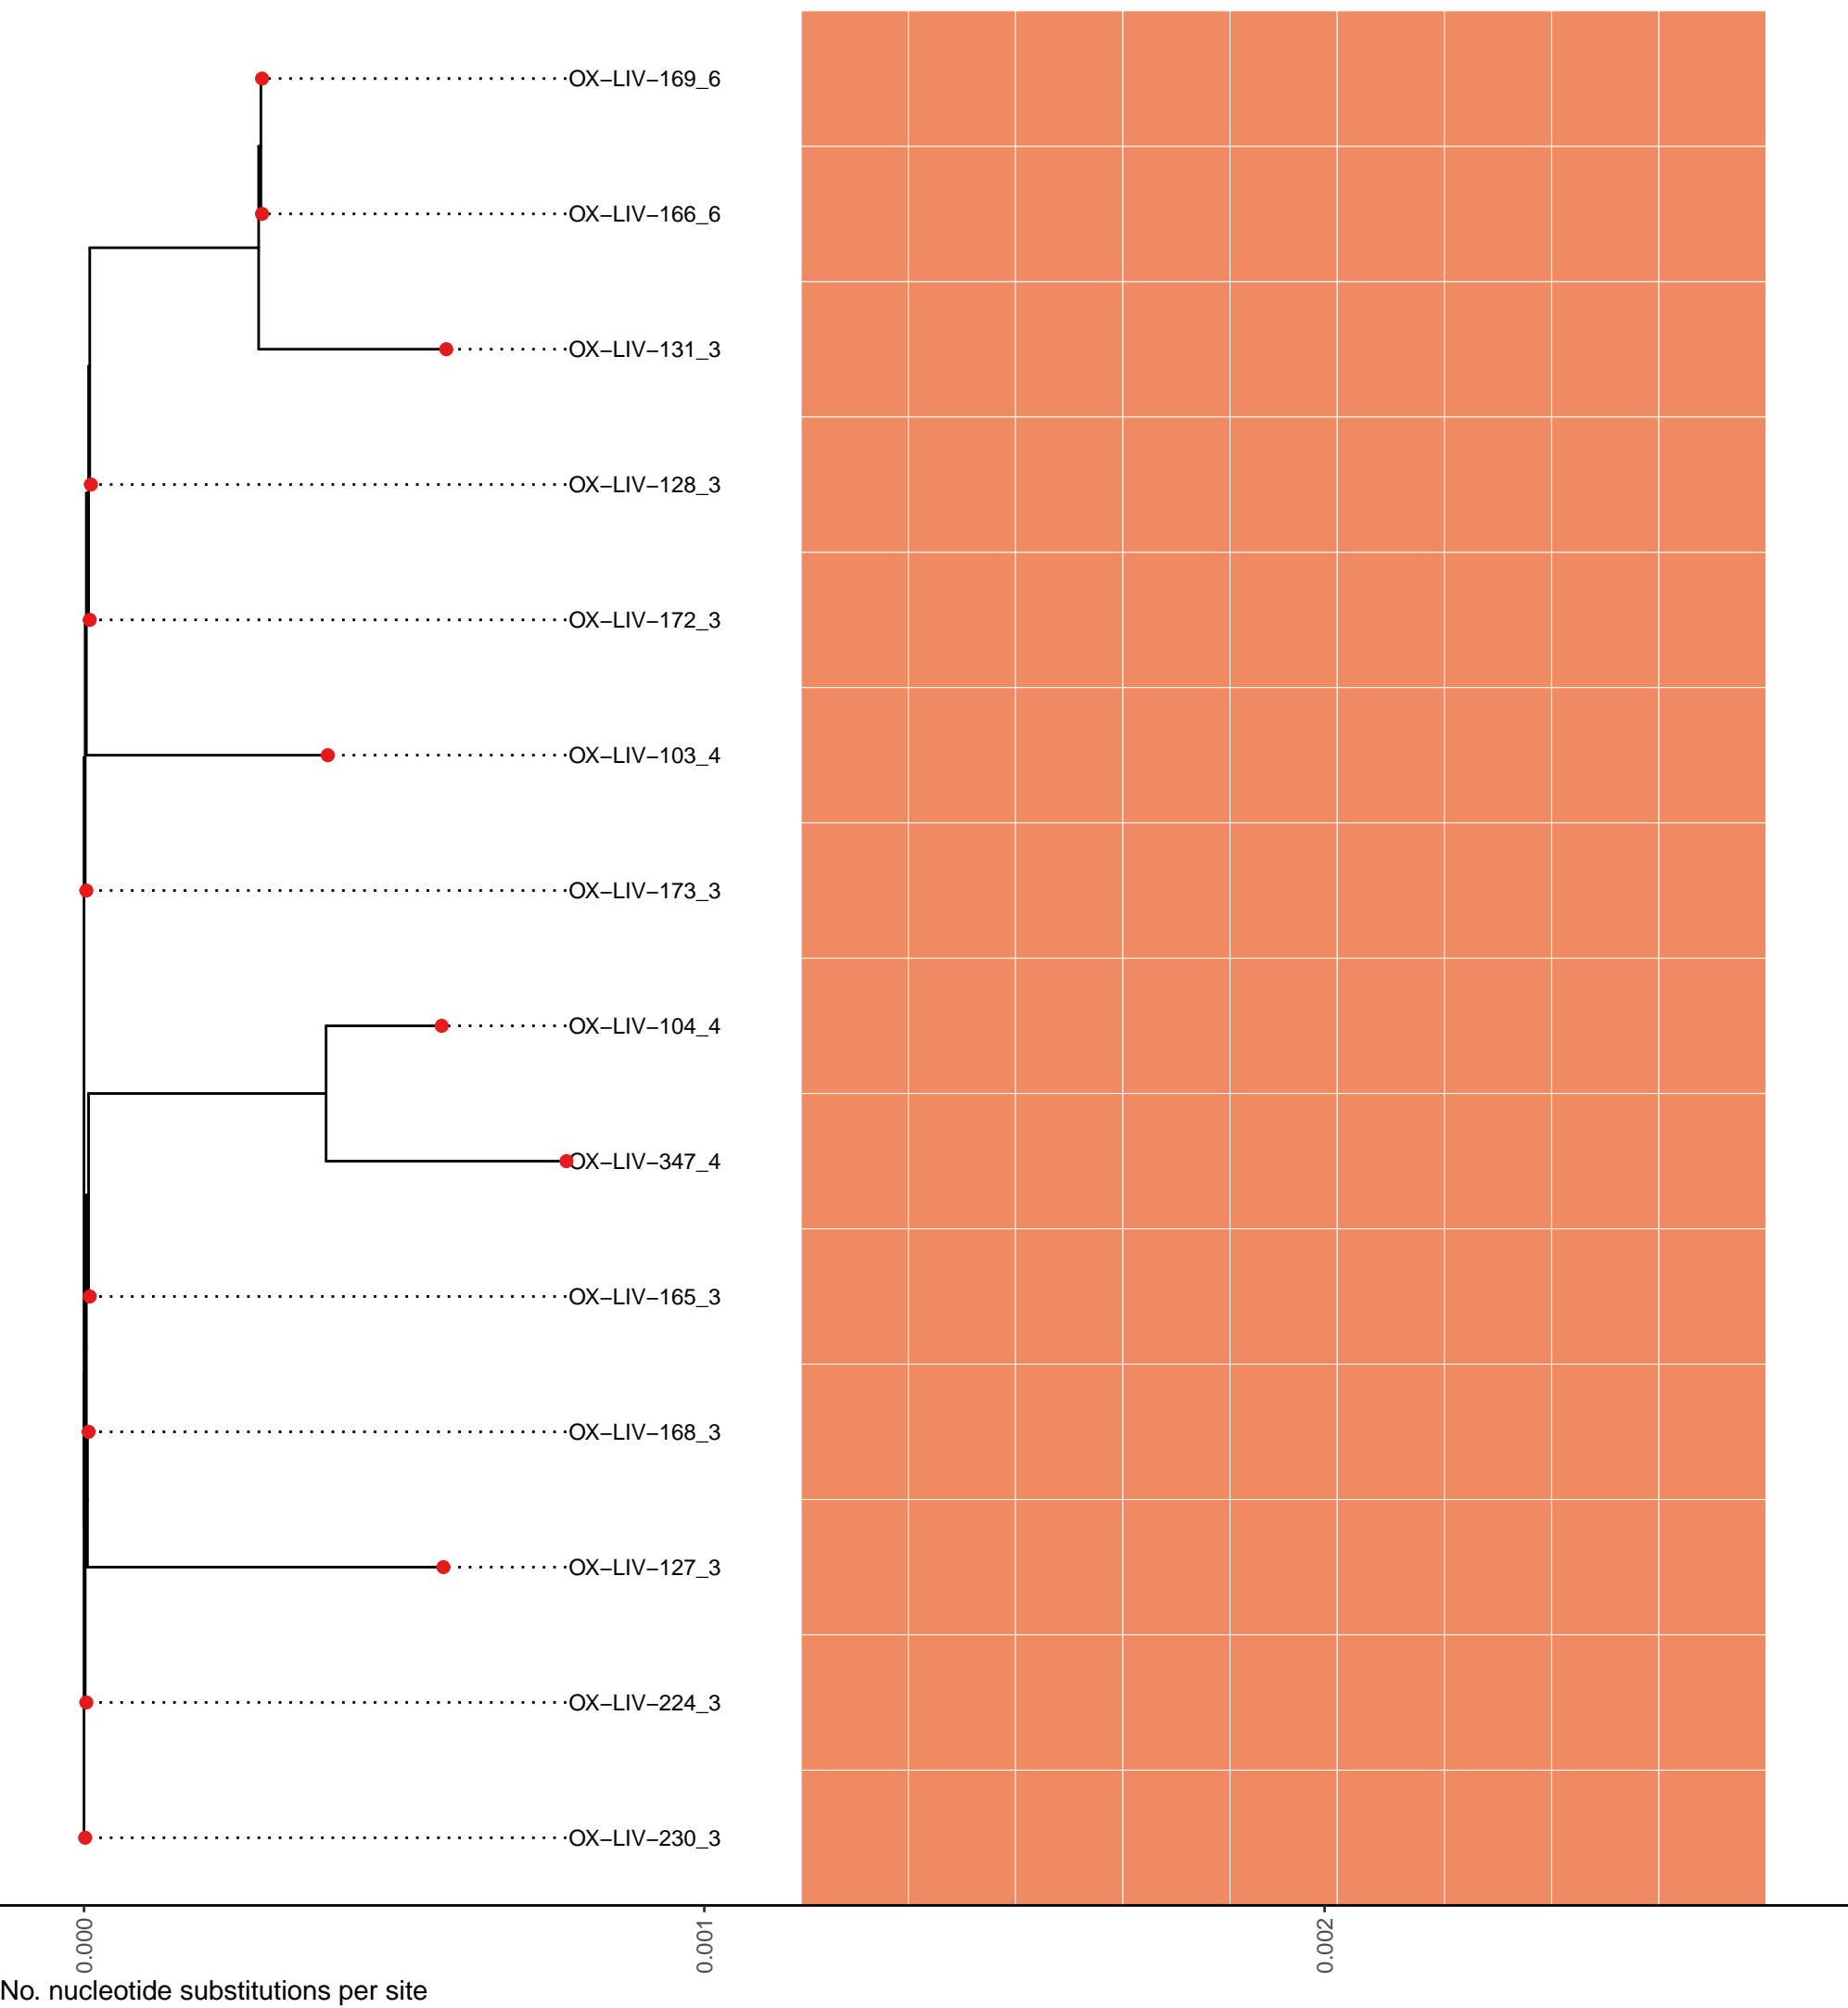

Gene type

- Absent
- Core
- Accessory
- Transposase

Compartment

- BSI
- Environmental
- Livestock
- WwTW

Cluster 47  
2 core genes  
1 accessory genes

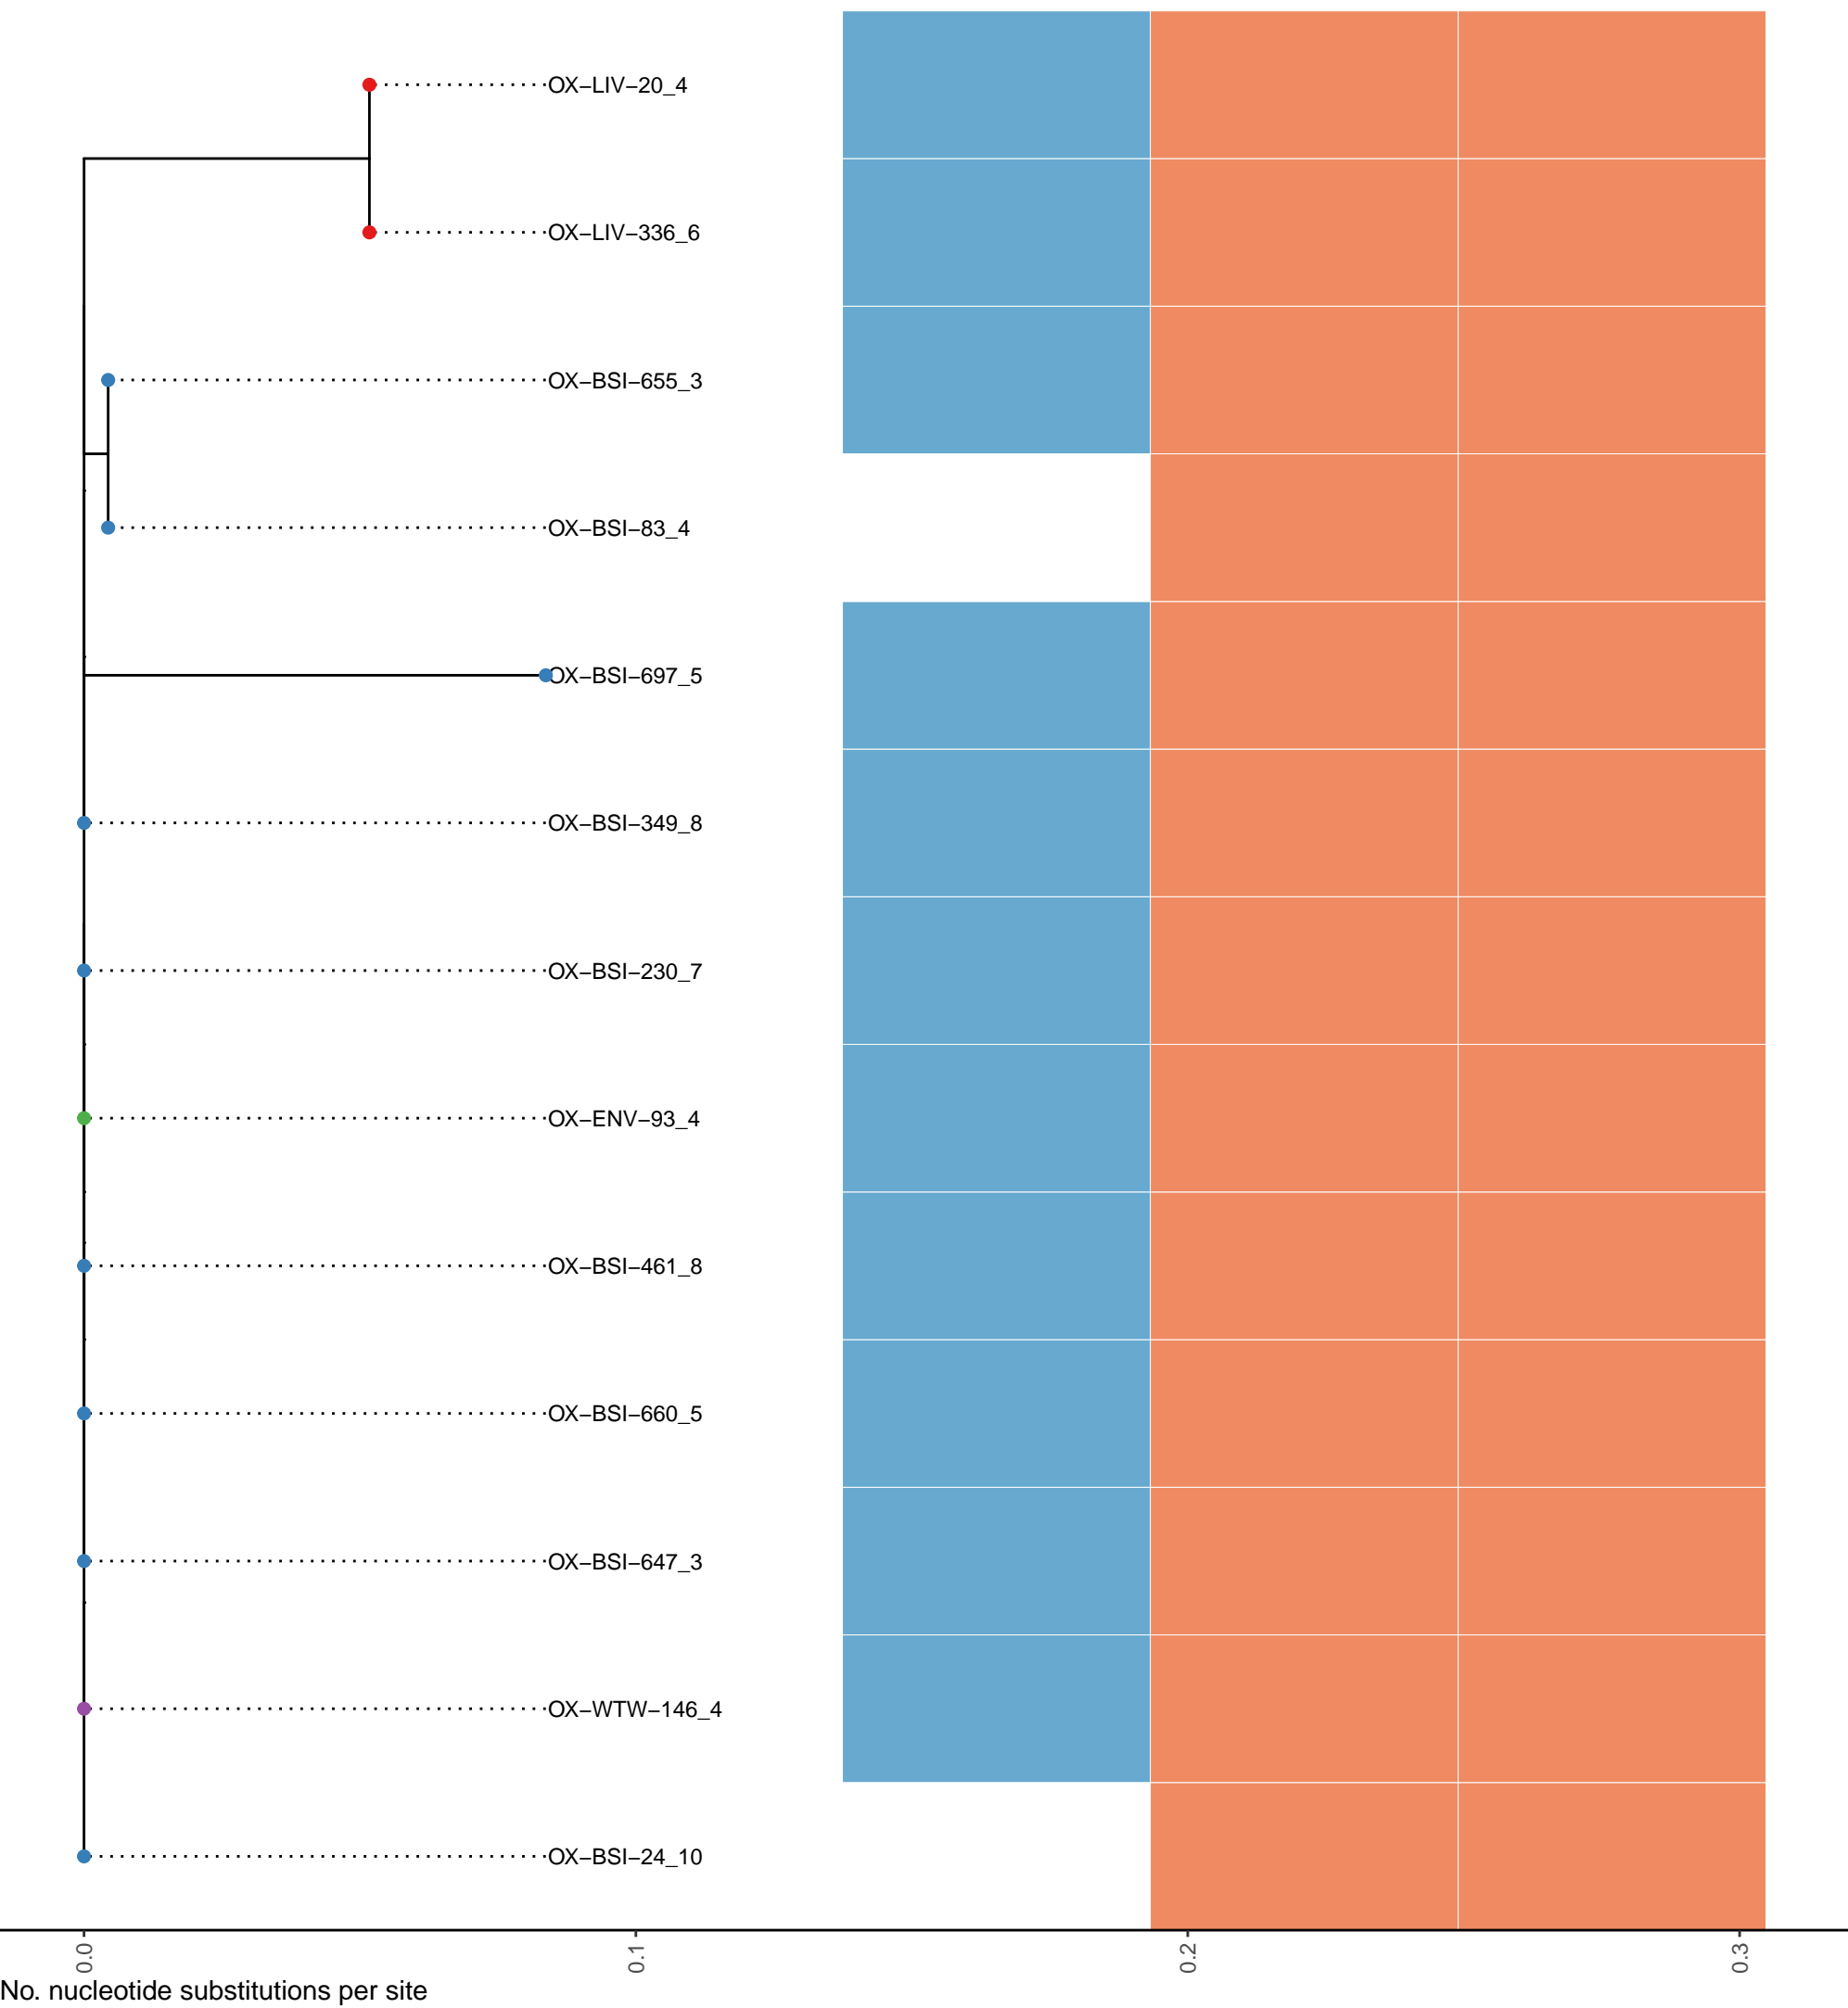

Gene type

- Absent
- Core
- Accessory
- Transposase

Compartment

- BSI
- Environmental
- Livestock
- WwTW

Cluster 48  
7 core genes  
3 accessory genes

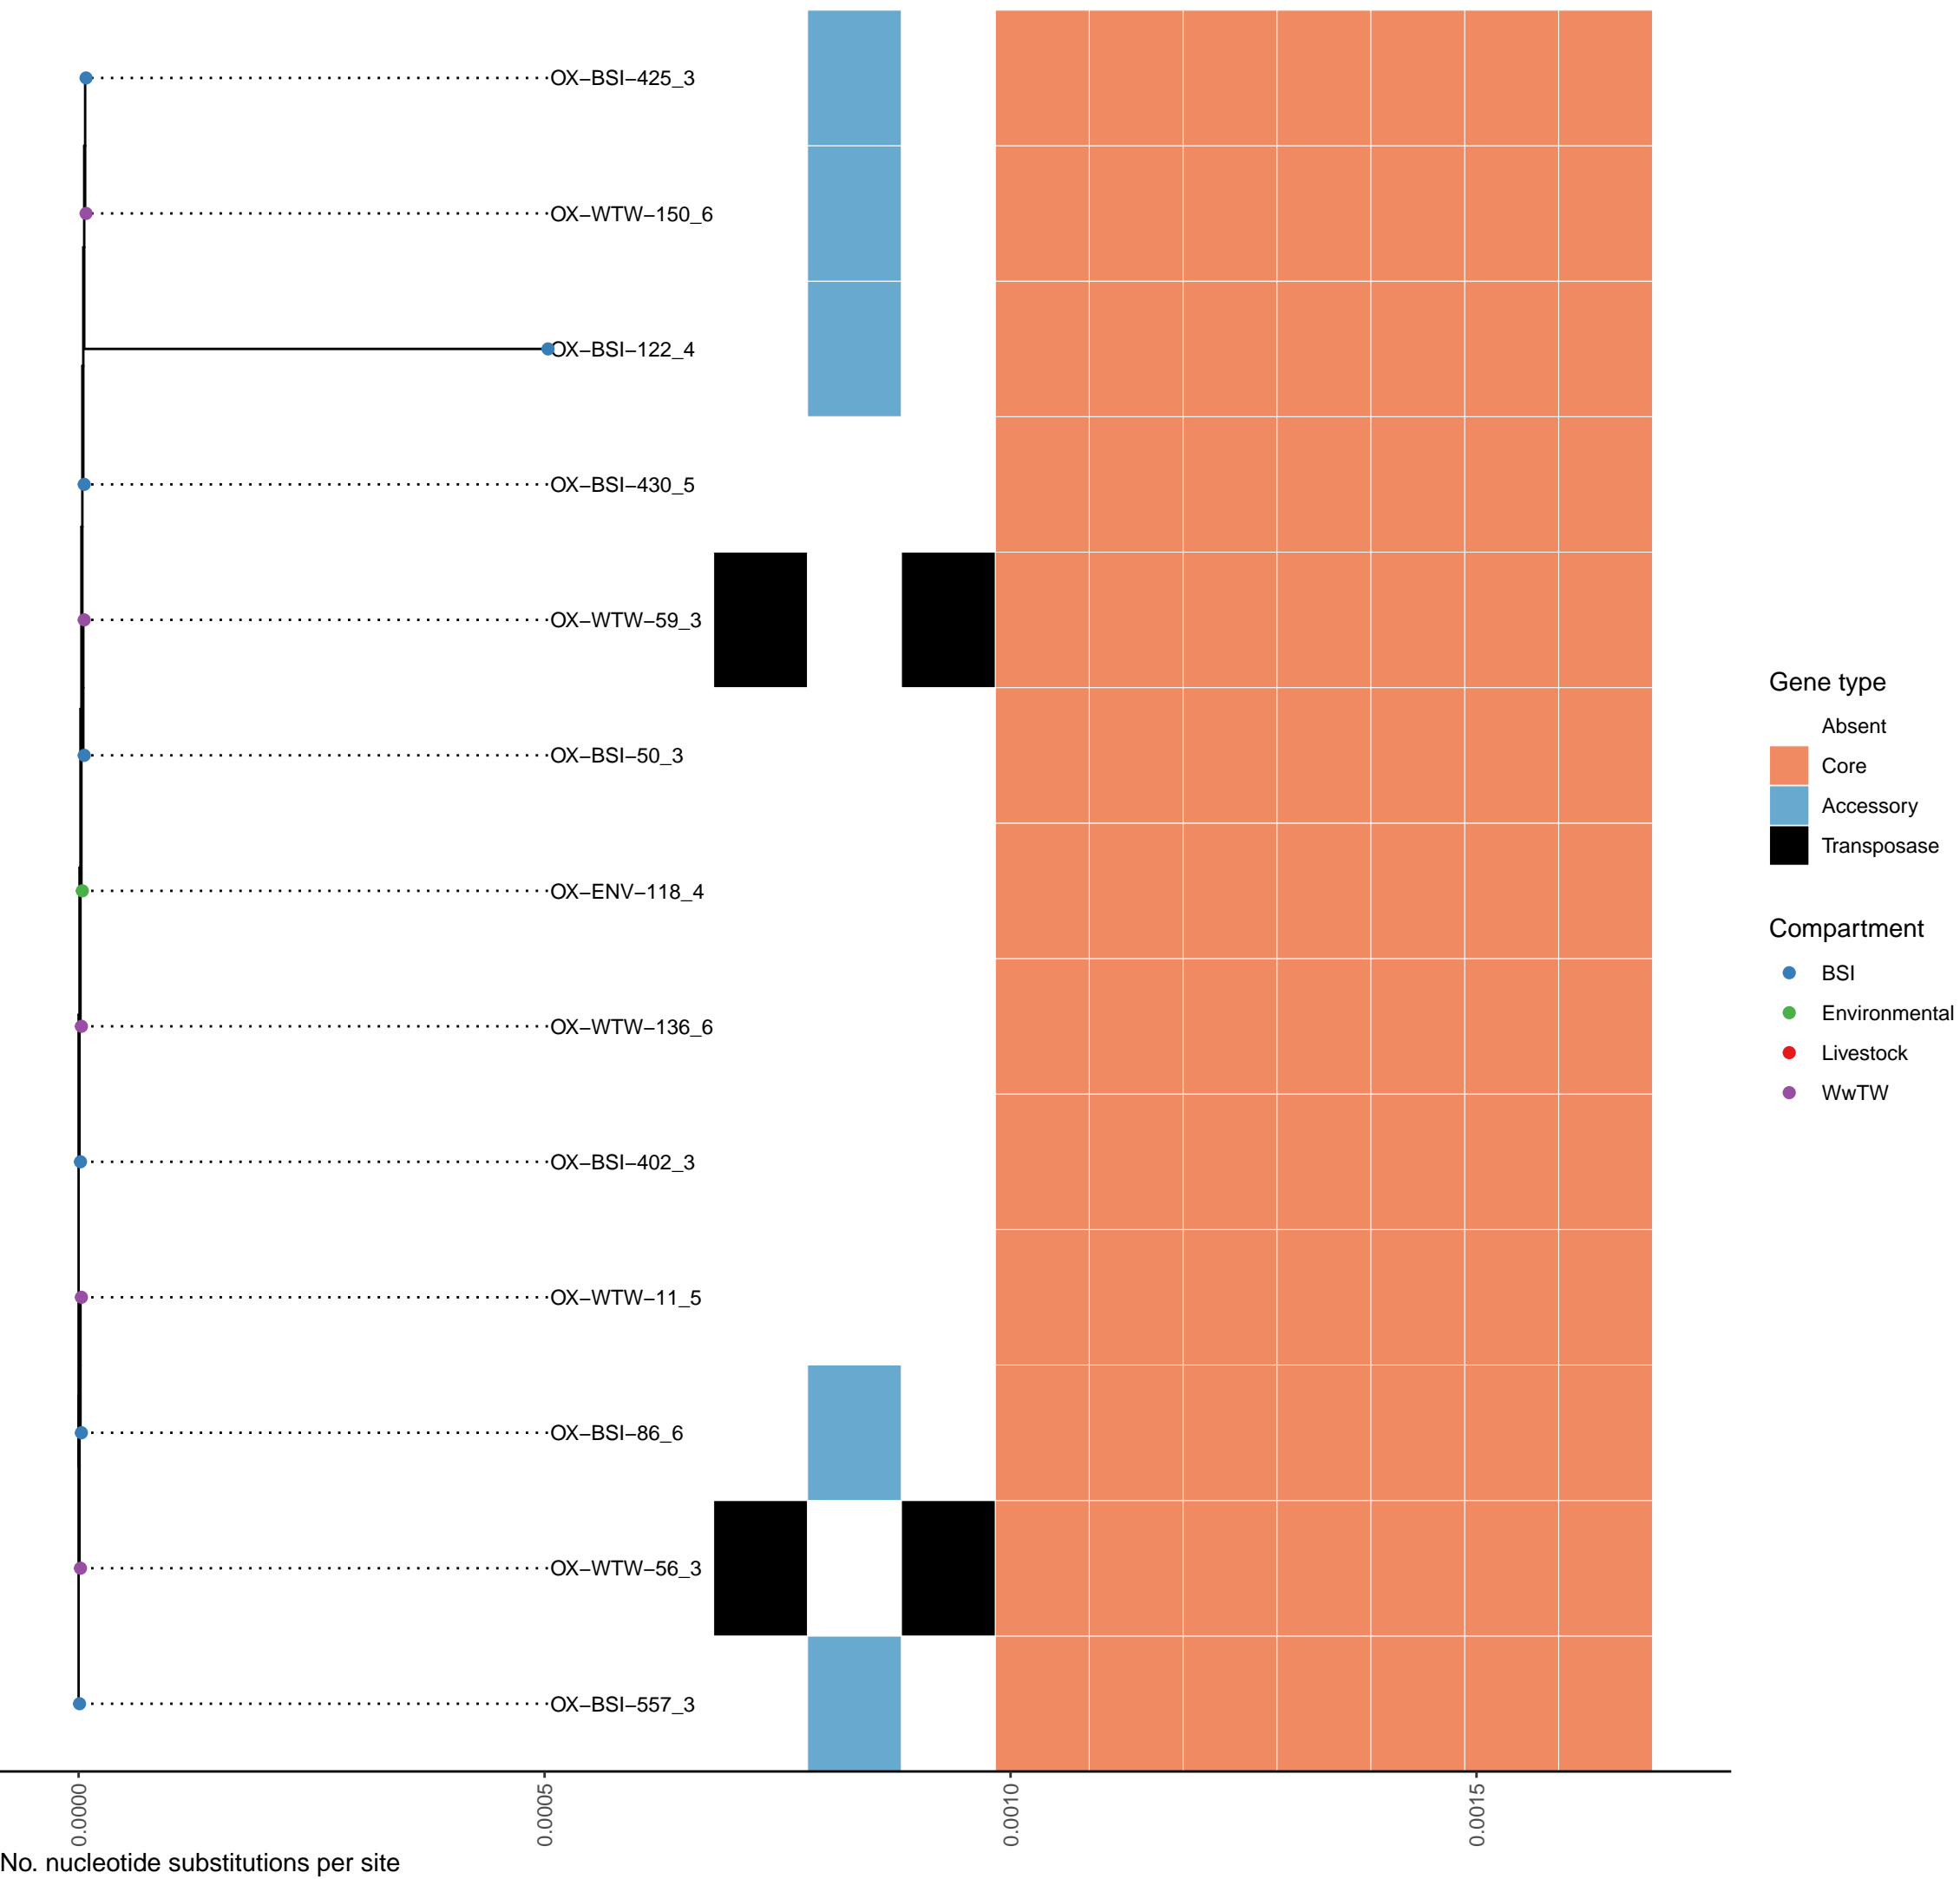

Cluster 49  
5 core genes  
3 accessory genes

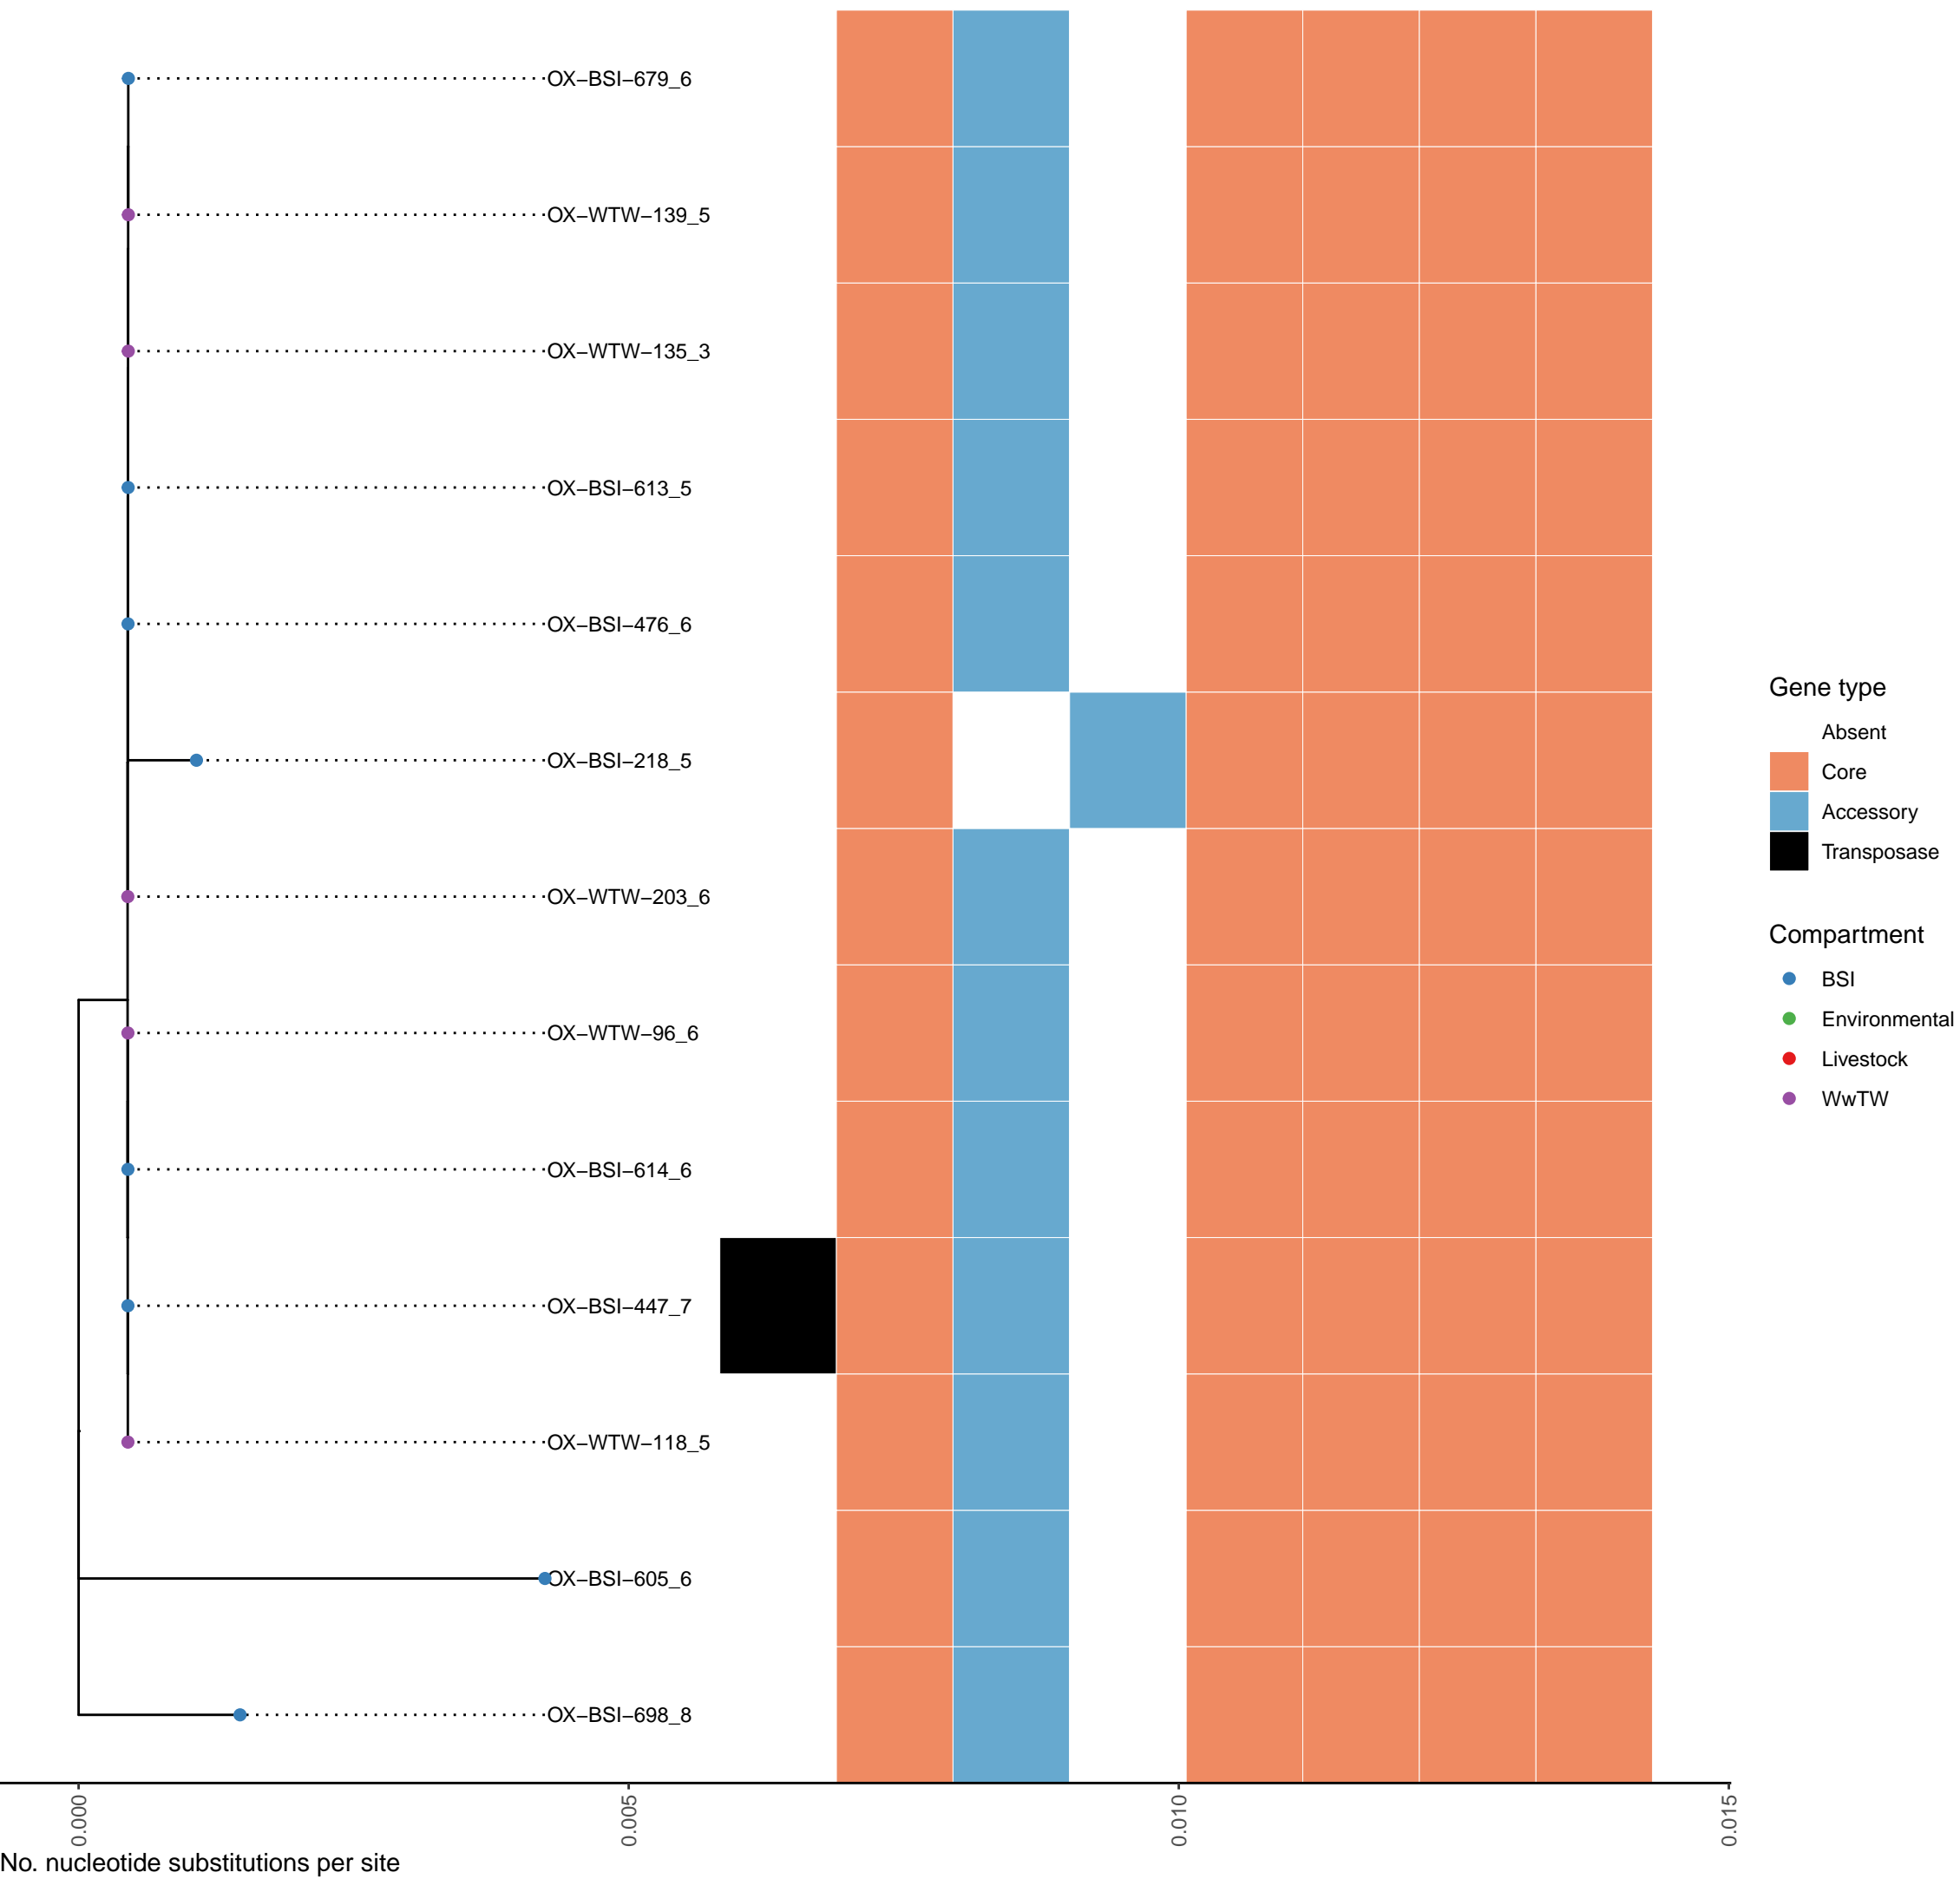

Cluster 50  
38 core genes  
19 accessory genes

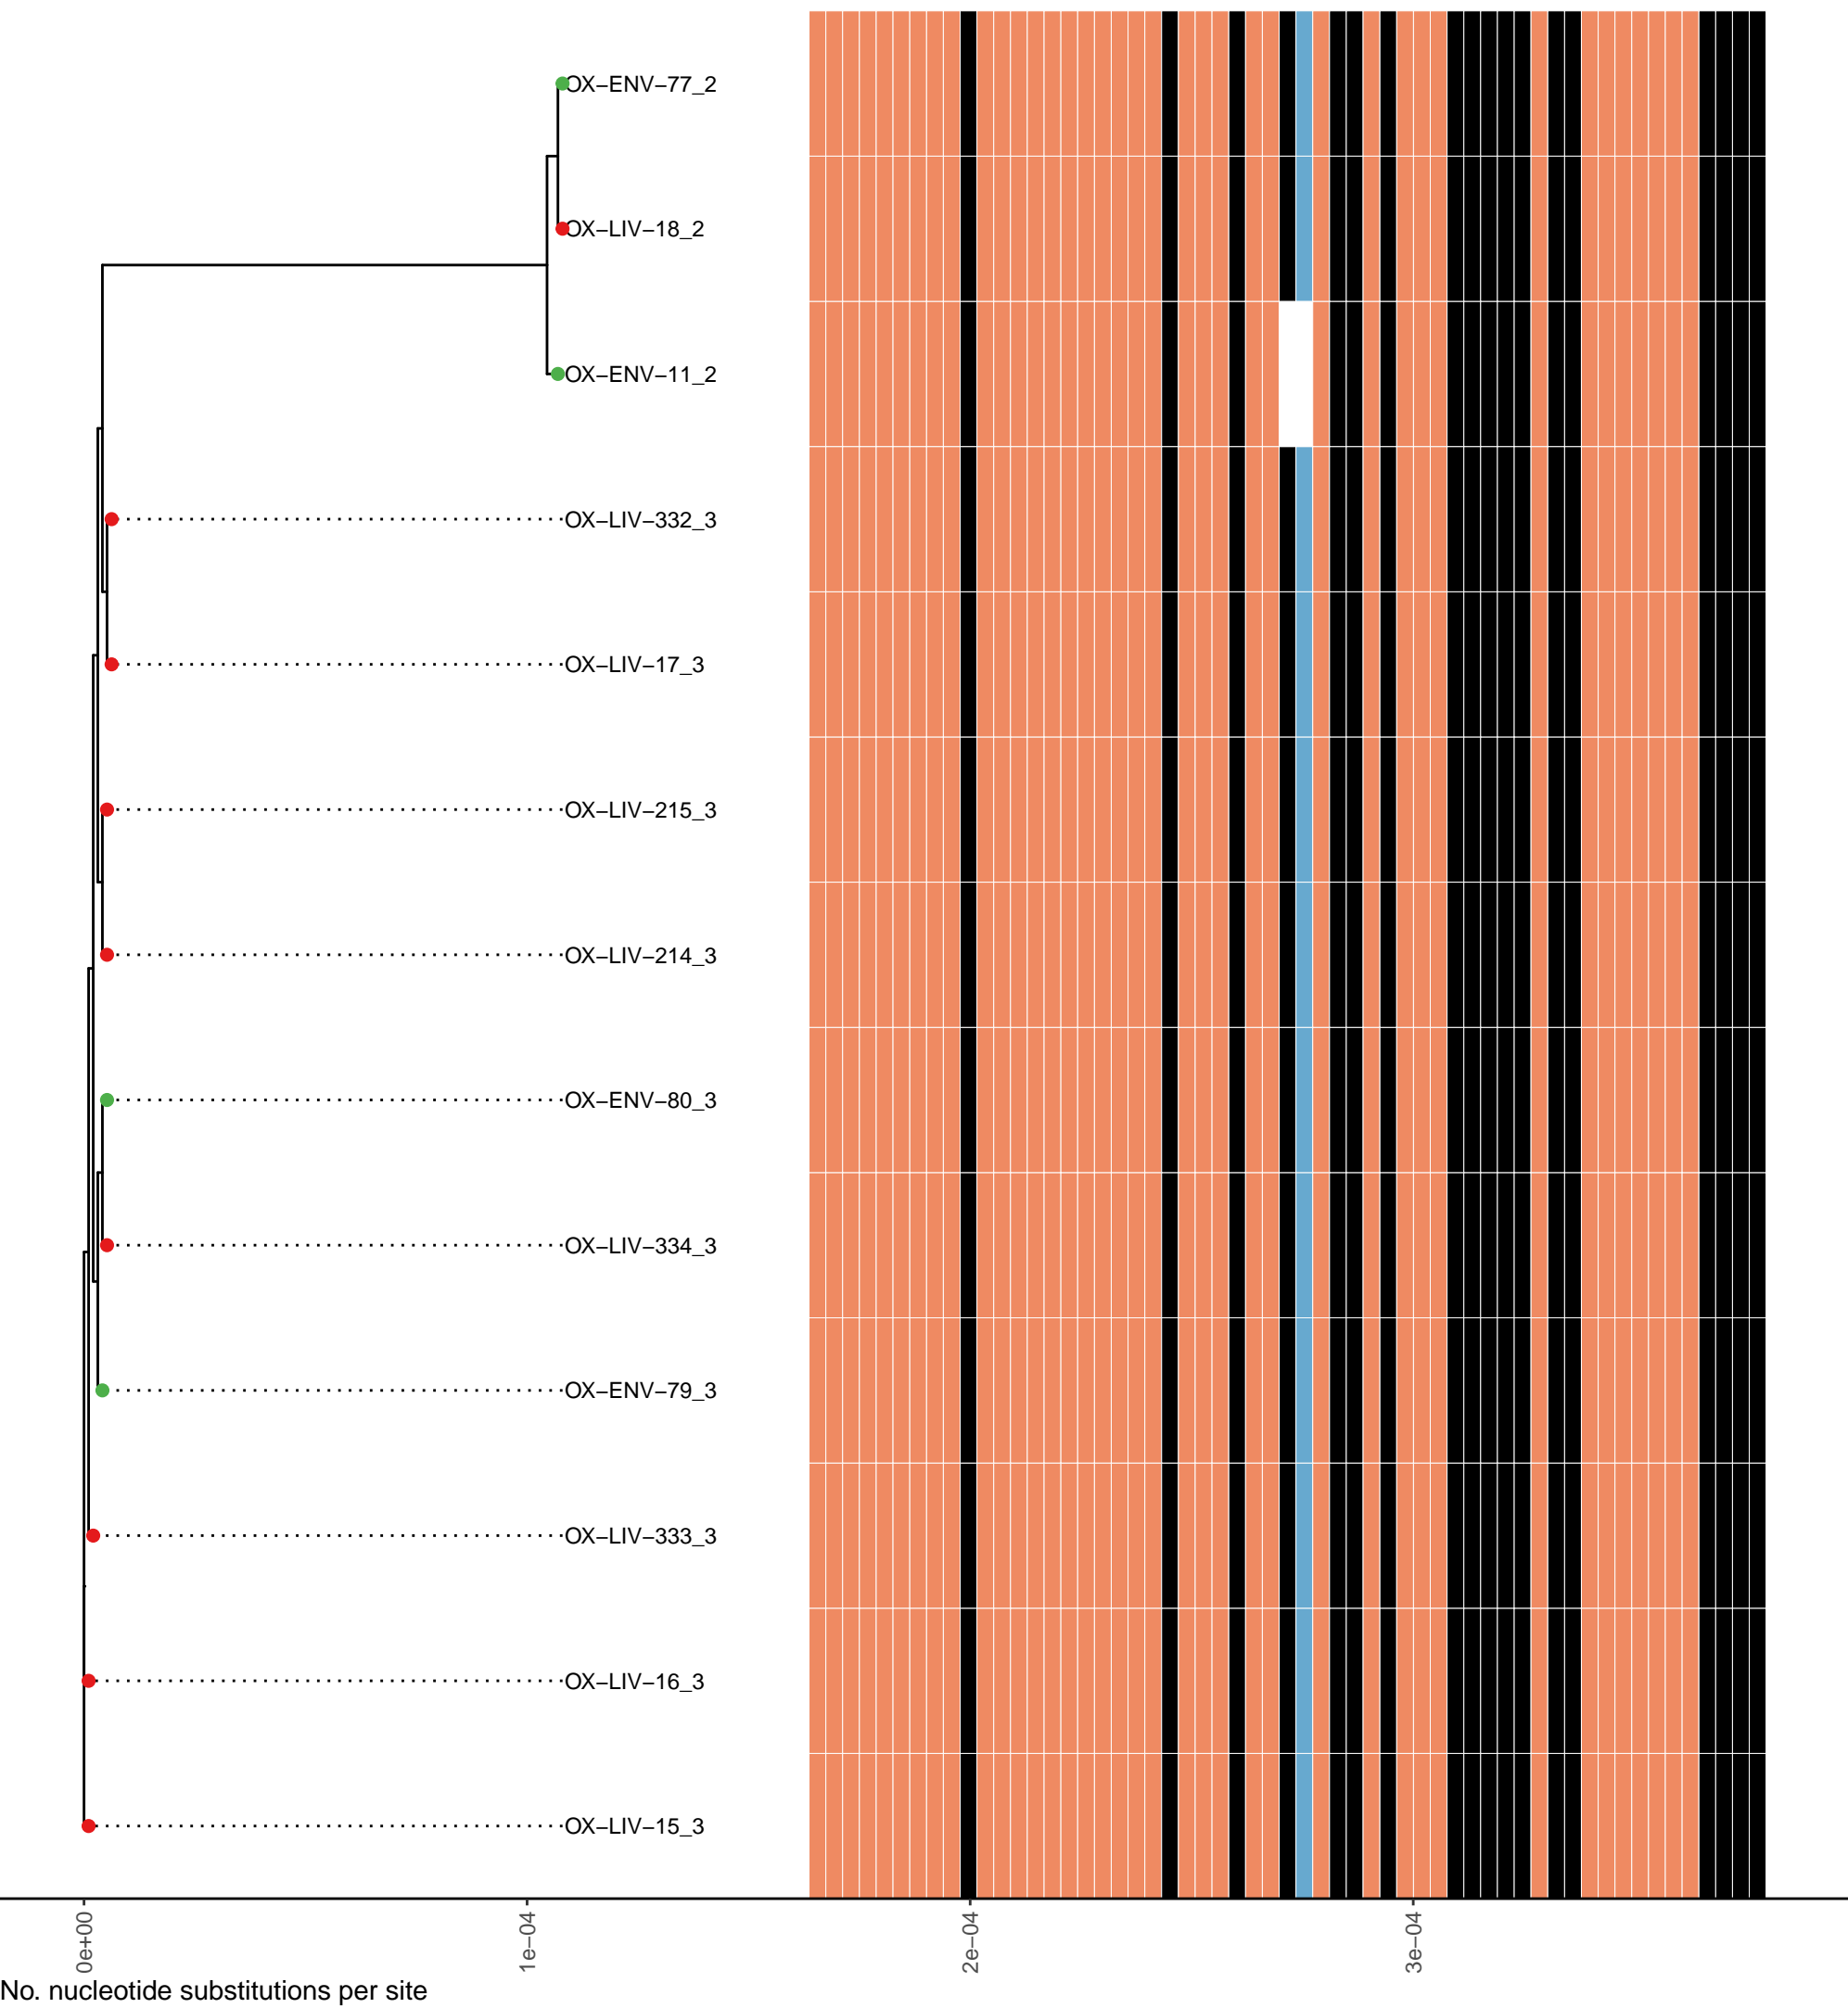

Cluster 51  
5 core genes  
13 accessory genes

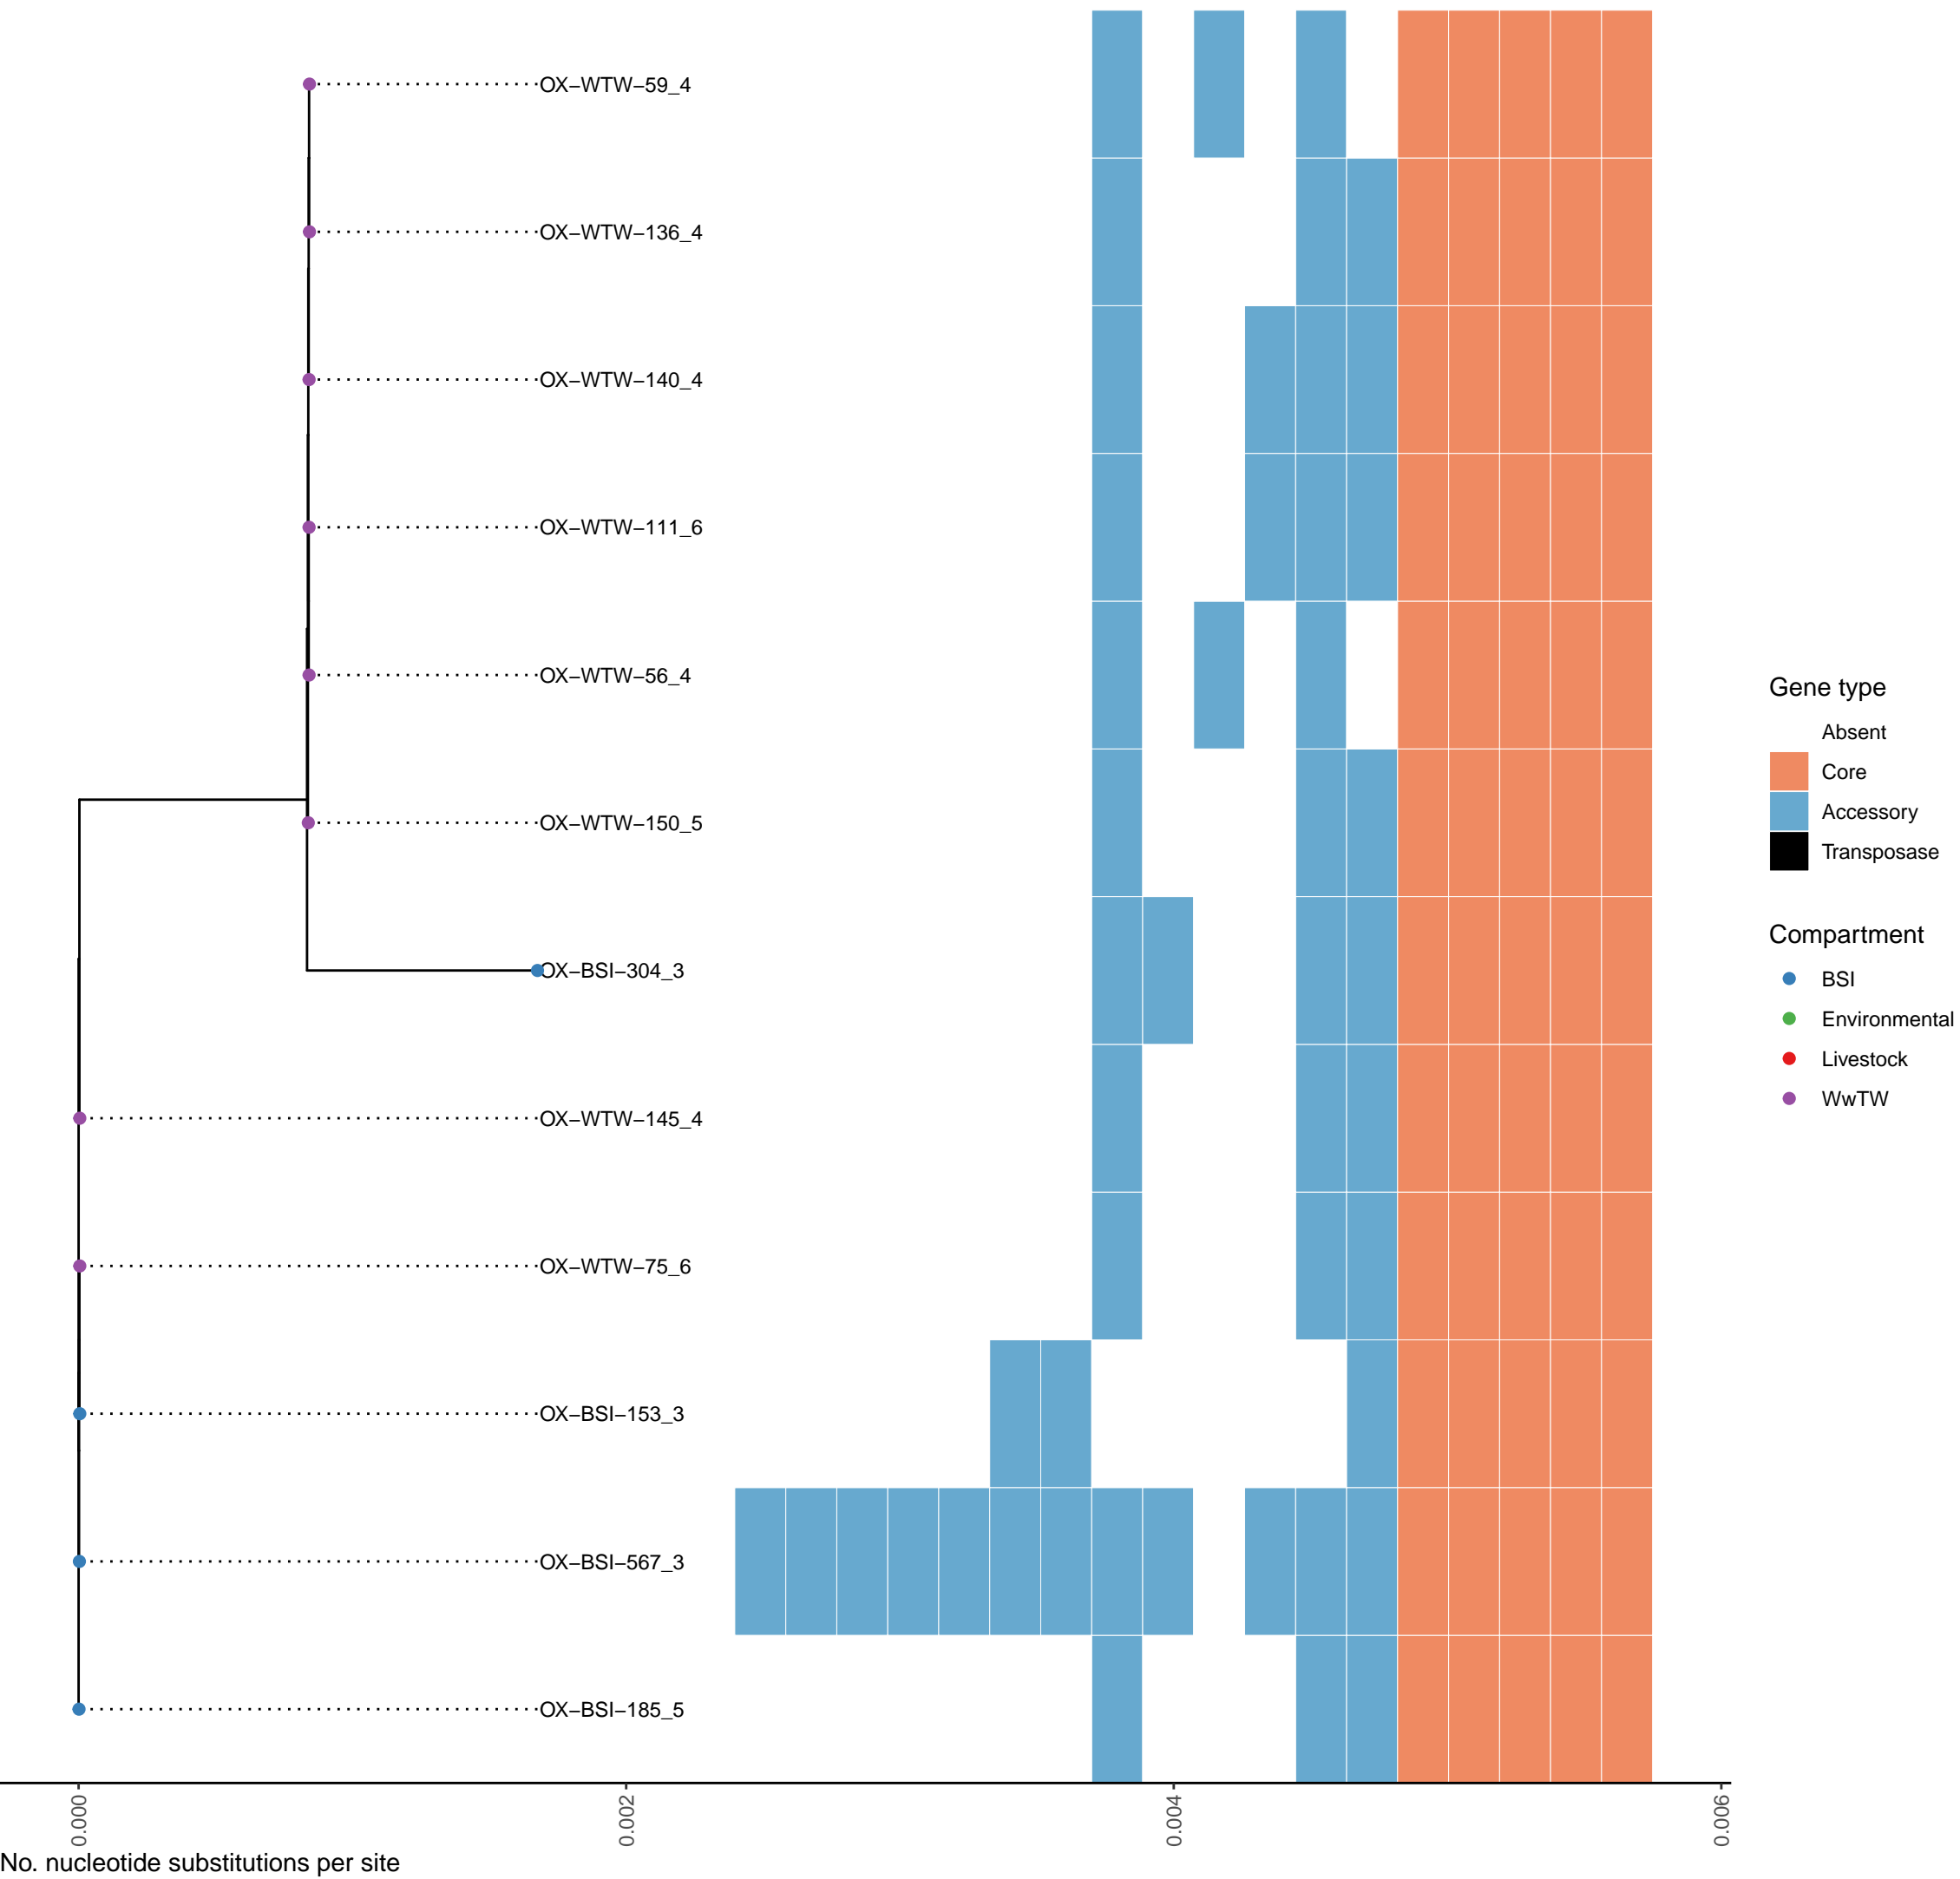

Cluster 52  
4 core genes  
2 accessory genes

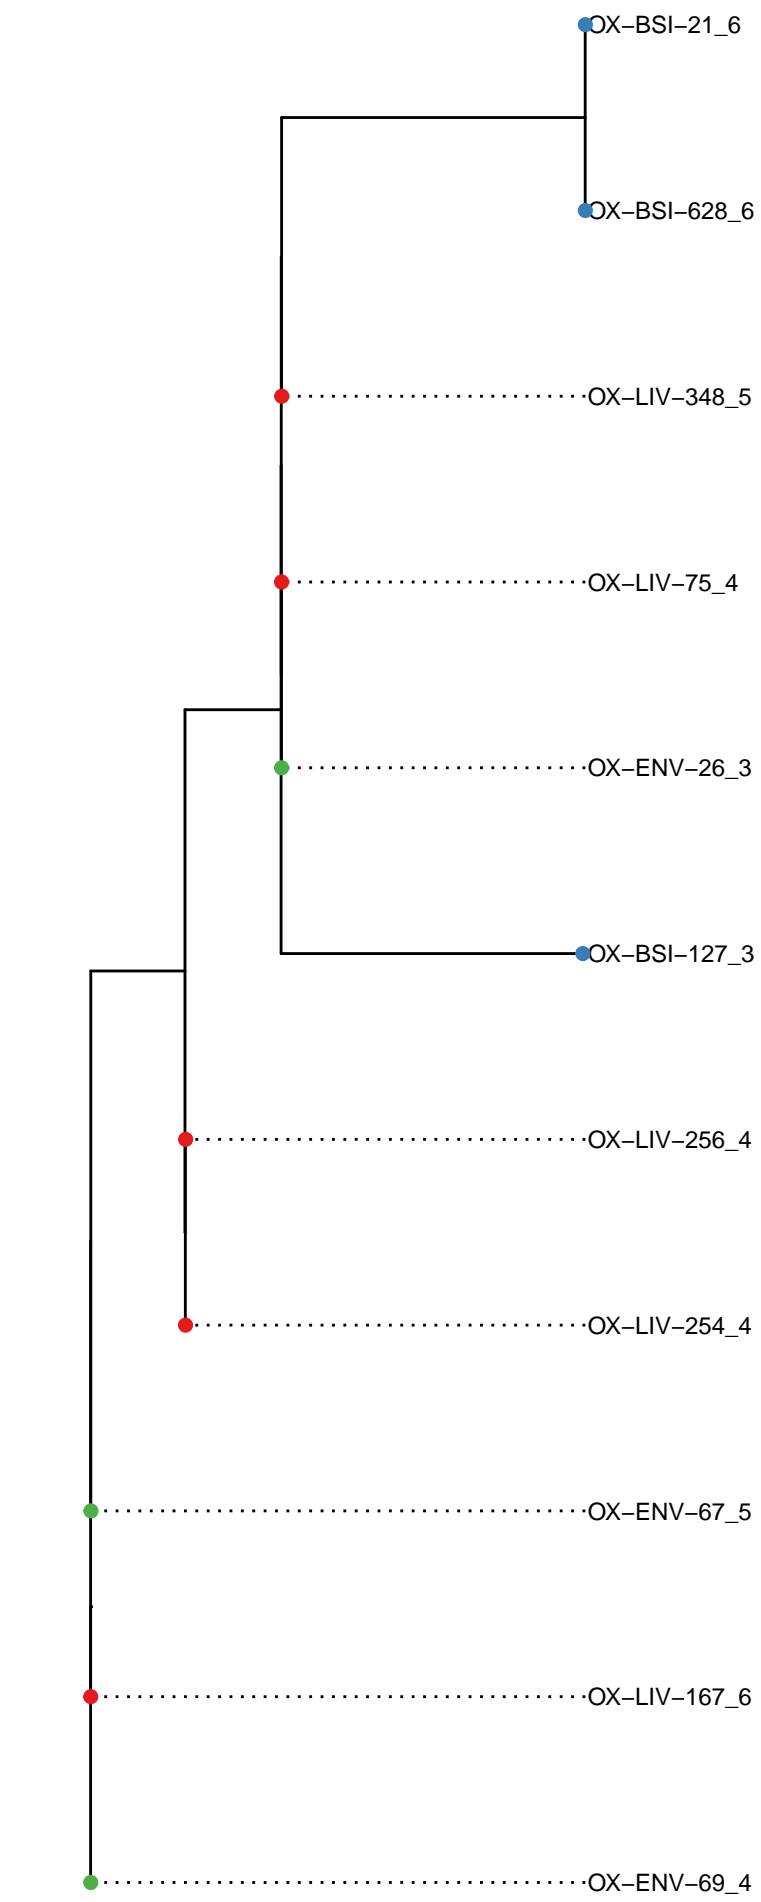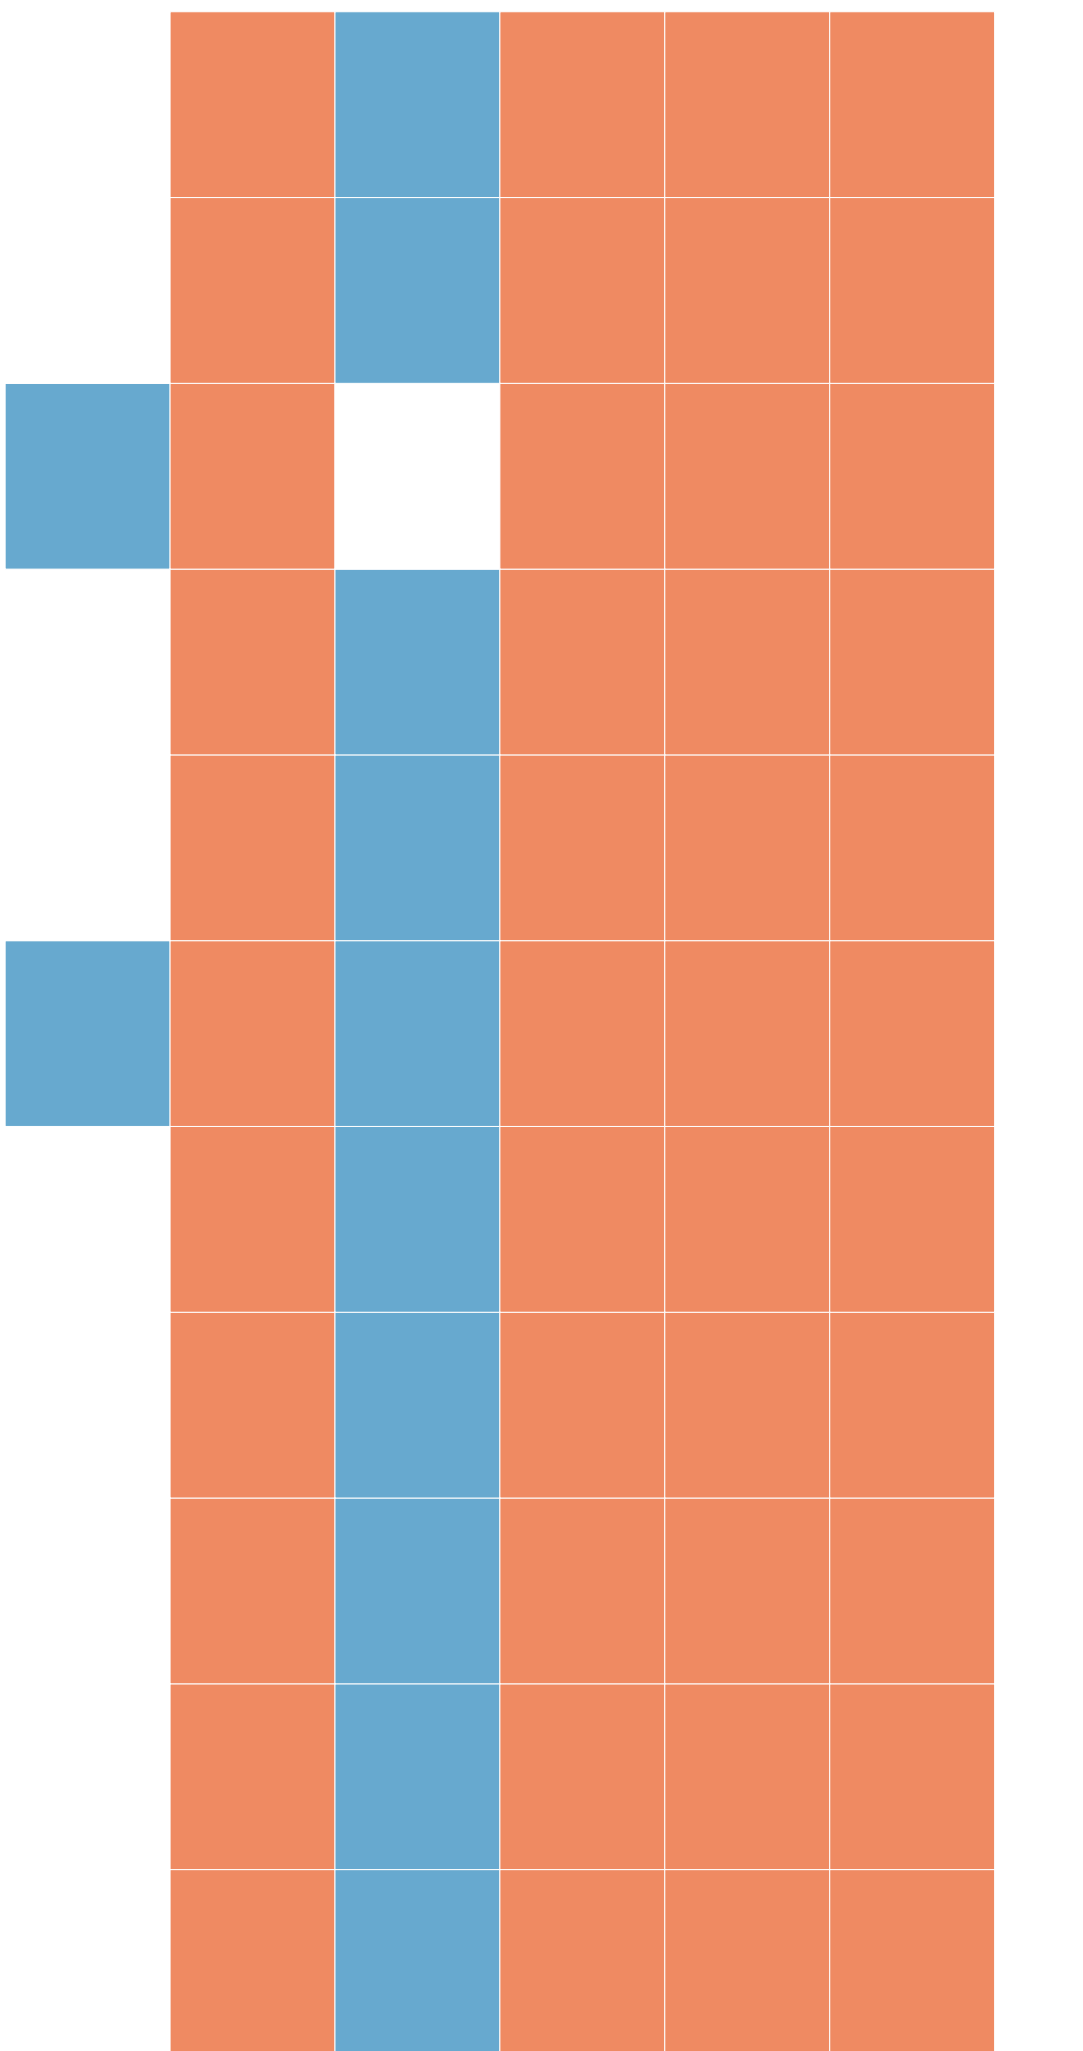

Gene type

- Absent
- Core
- Accessory
- Transposase

Compartment

- BSI
- Environmental
- Livestock
- WwTW

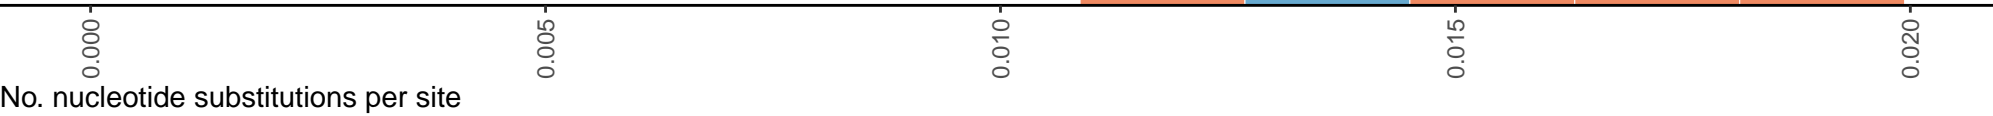

Cluster 53  
3 core genes  
1 accessory genes

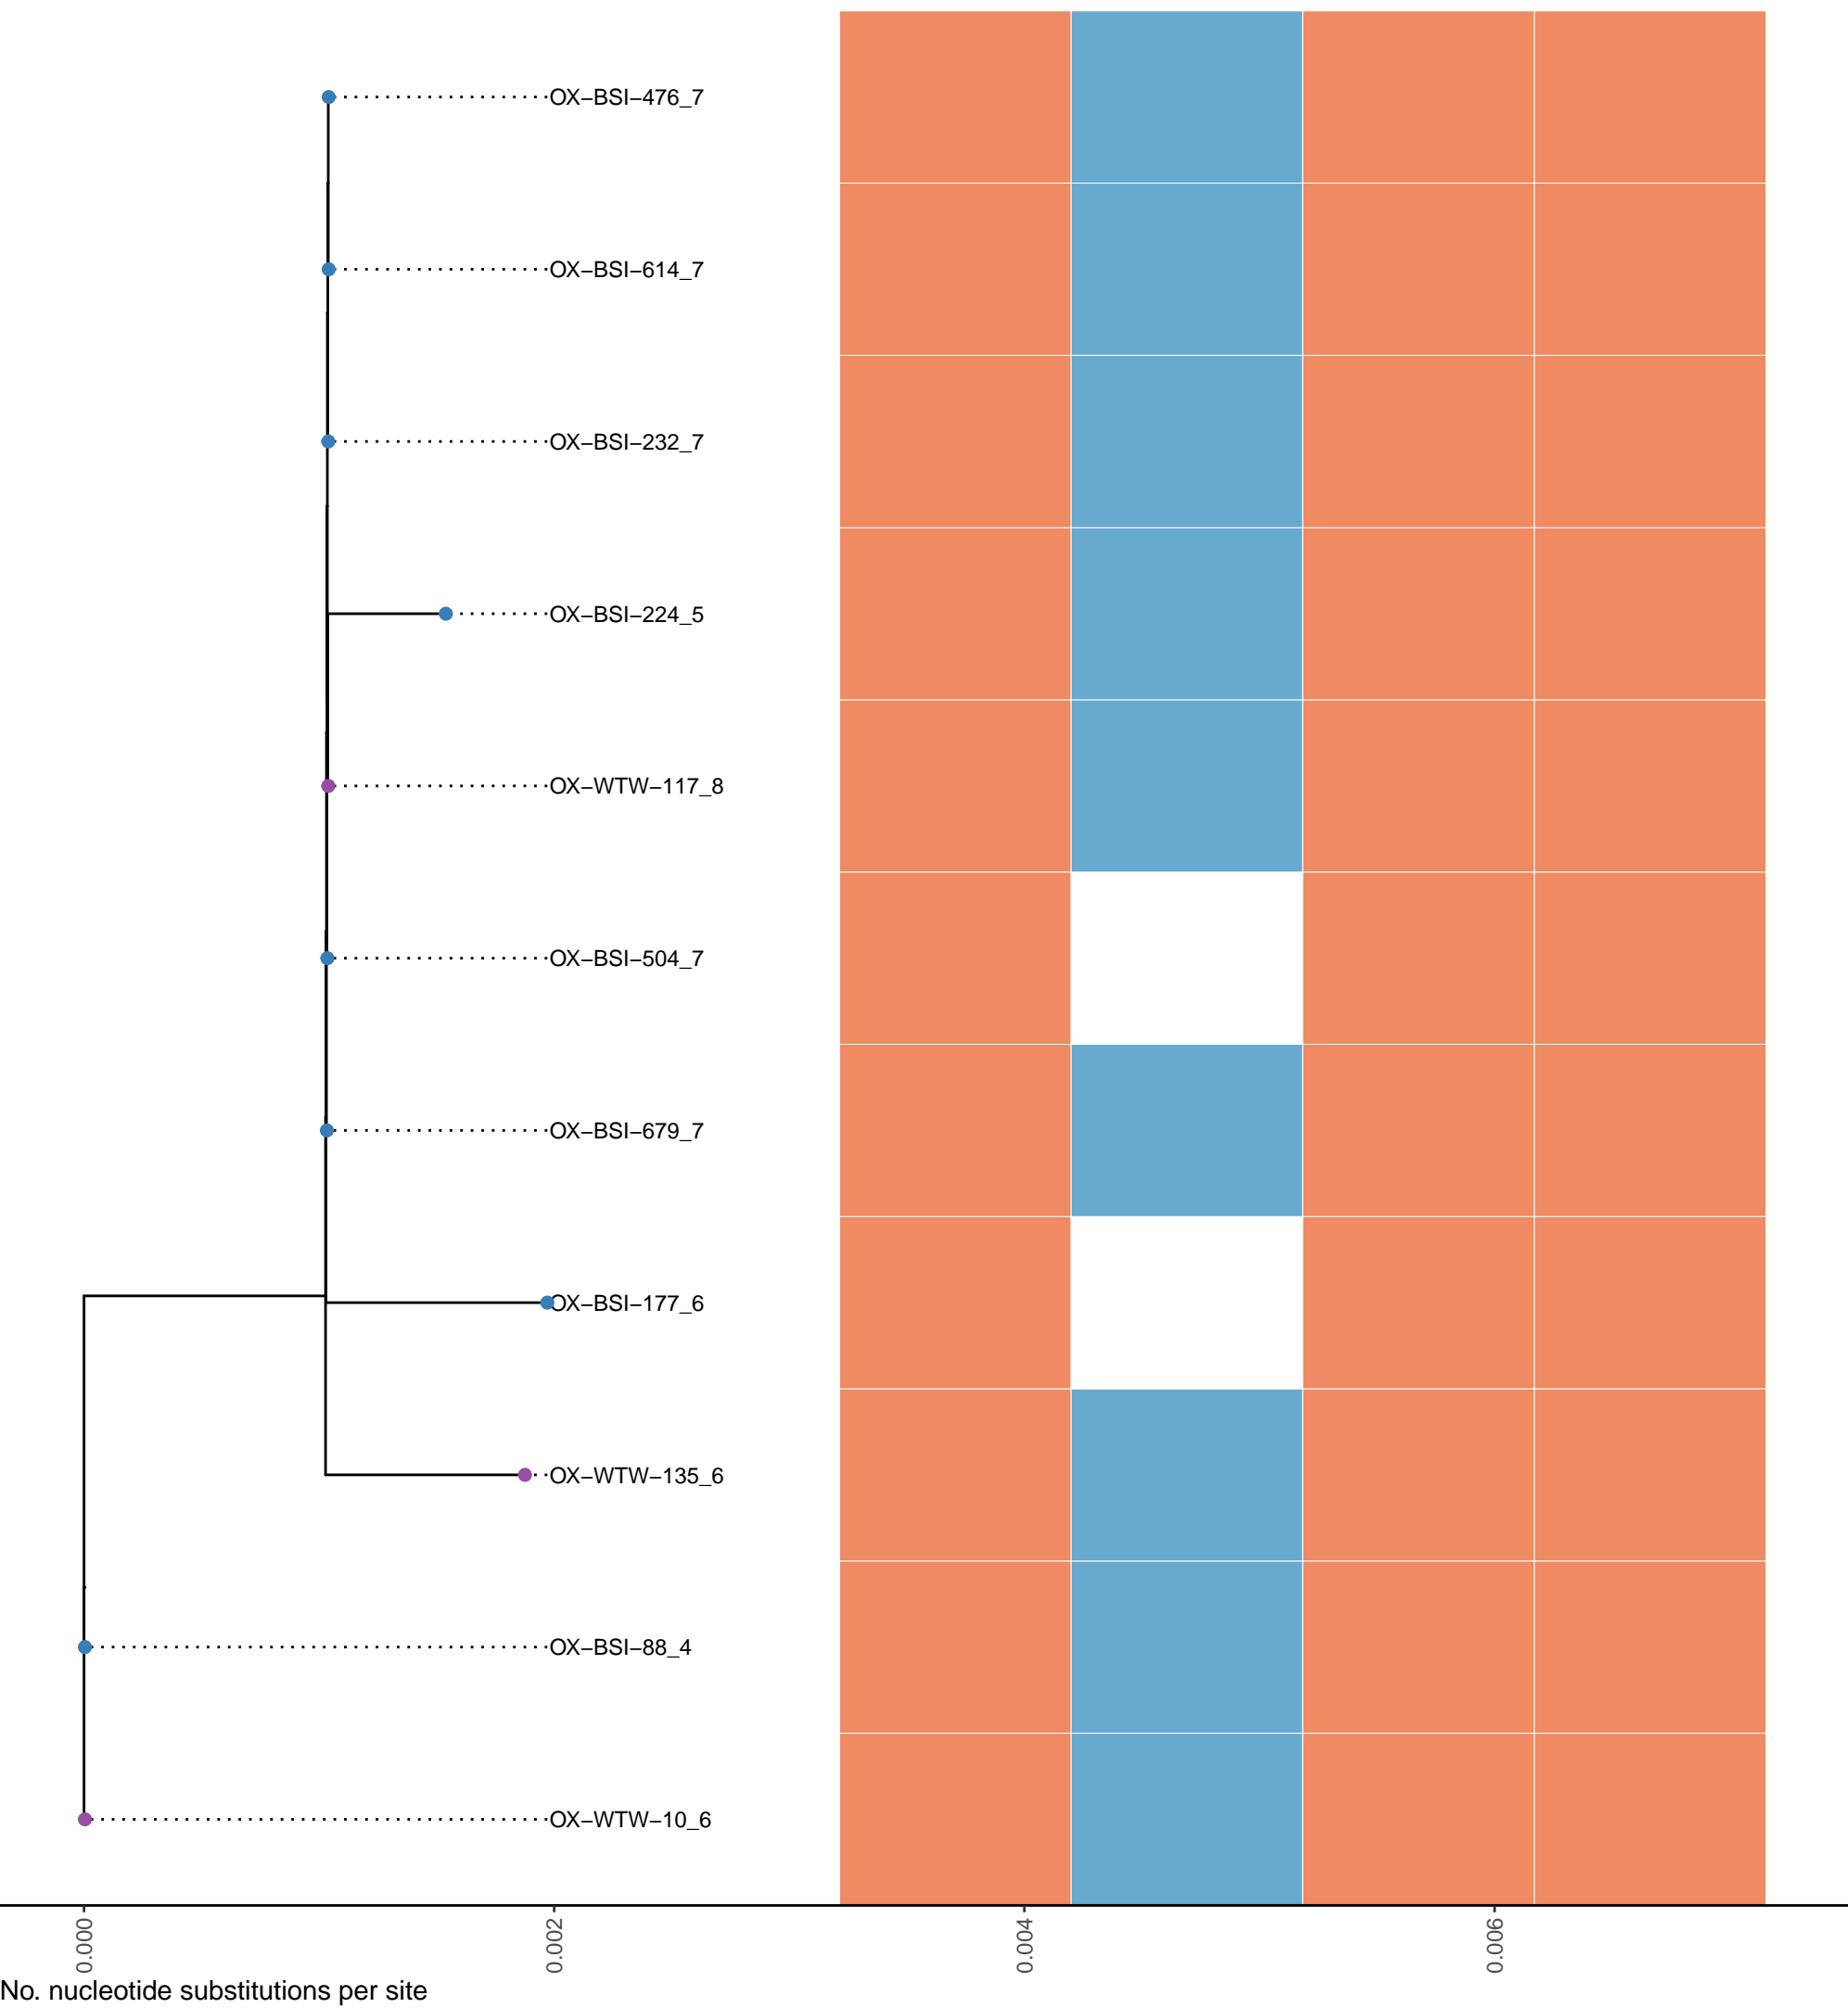

Gene type

- Absent
- Core
- Accessory
- Transposase

Compartment

- BSI
- Environmental
- Livestock
- WwTW

Cluster 54  
7 core genes  
3 accessory genes

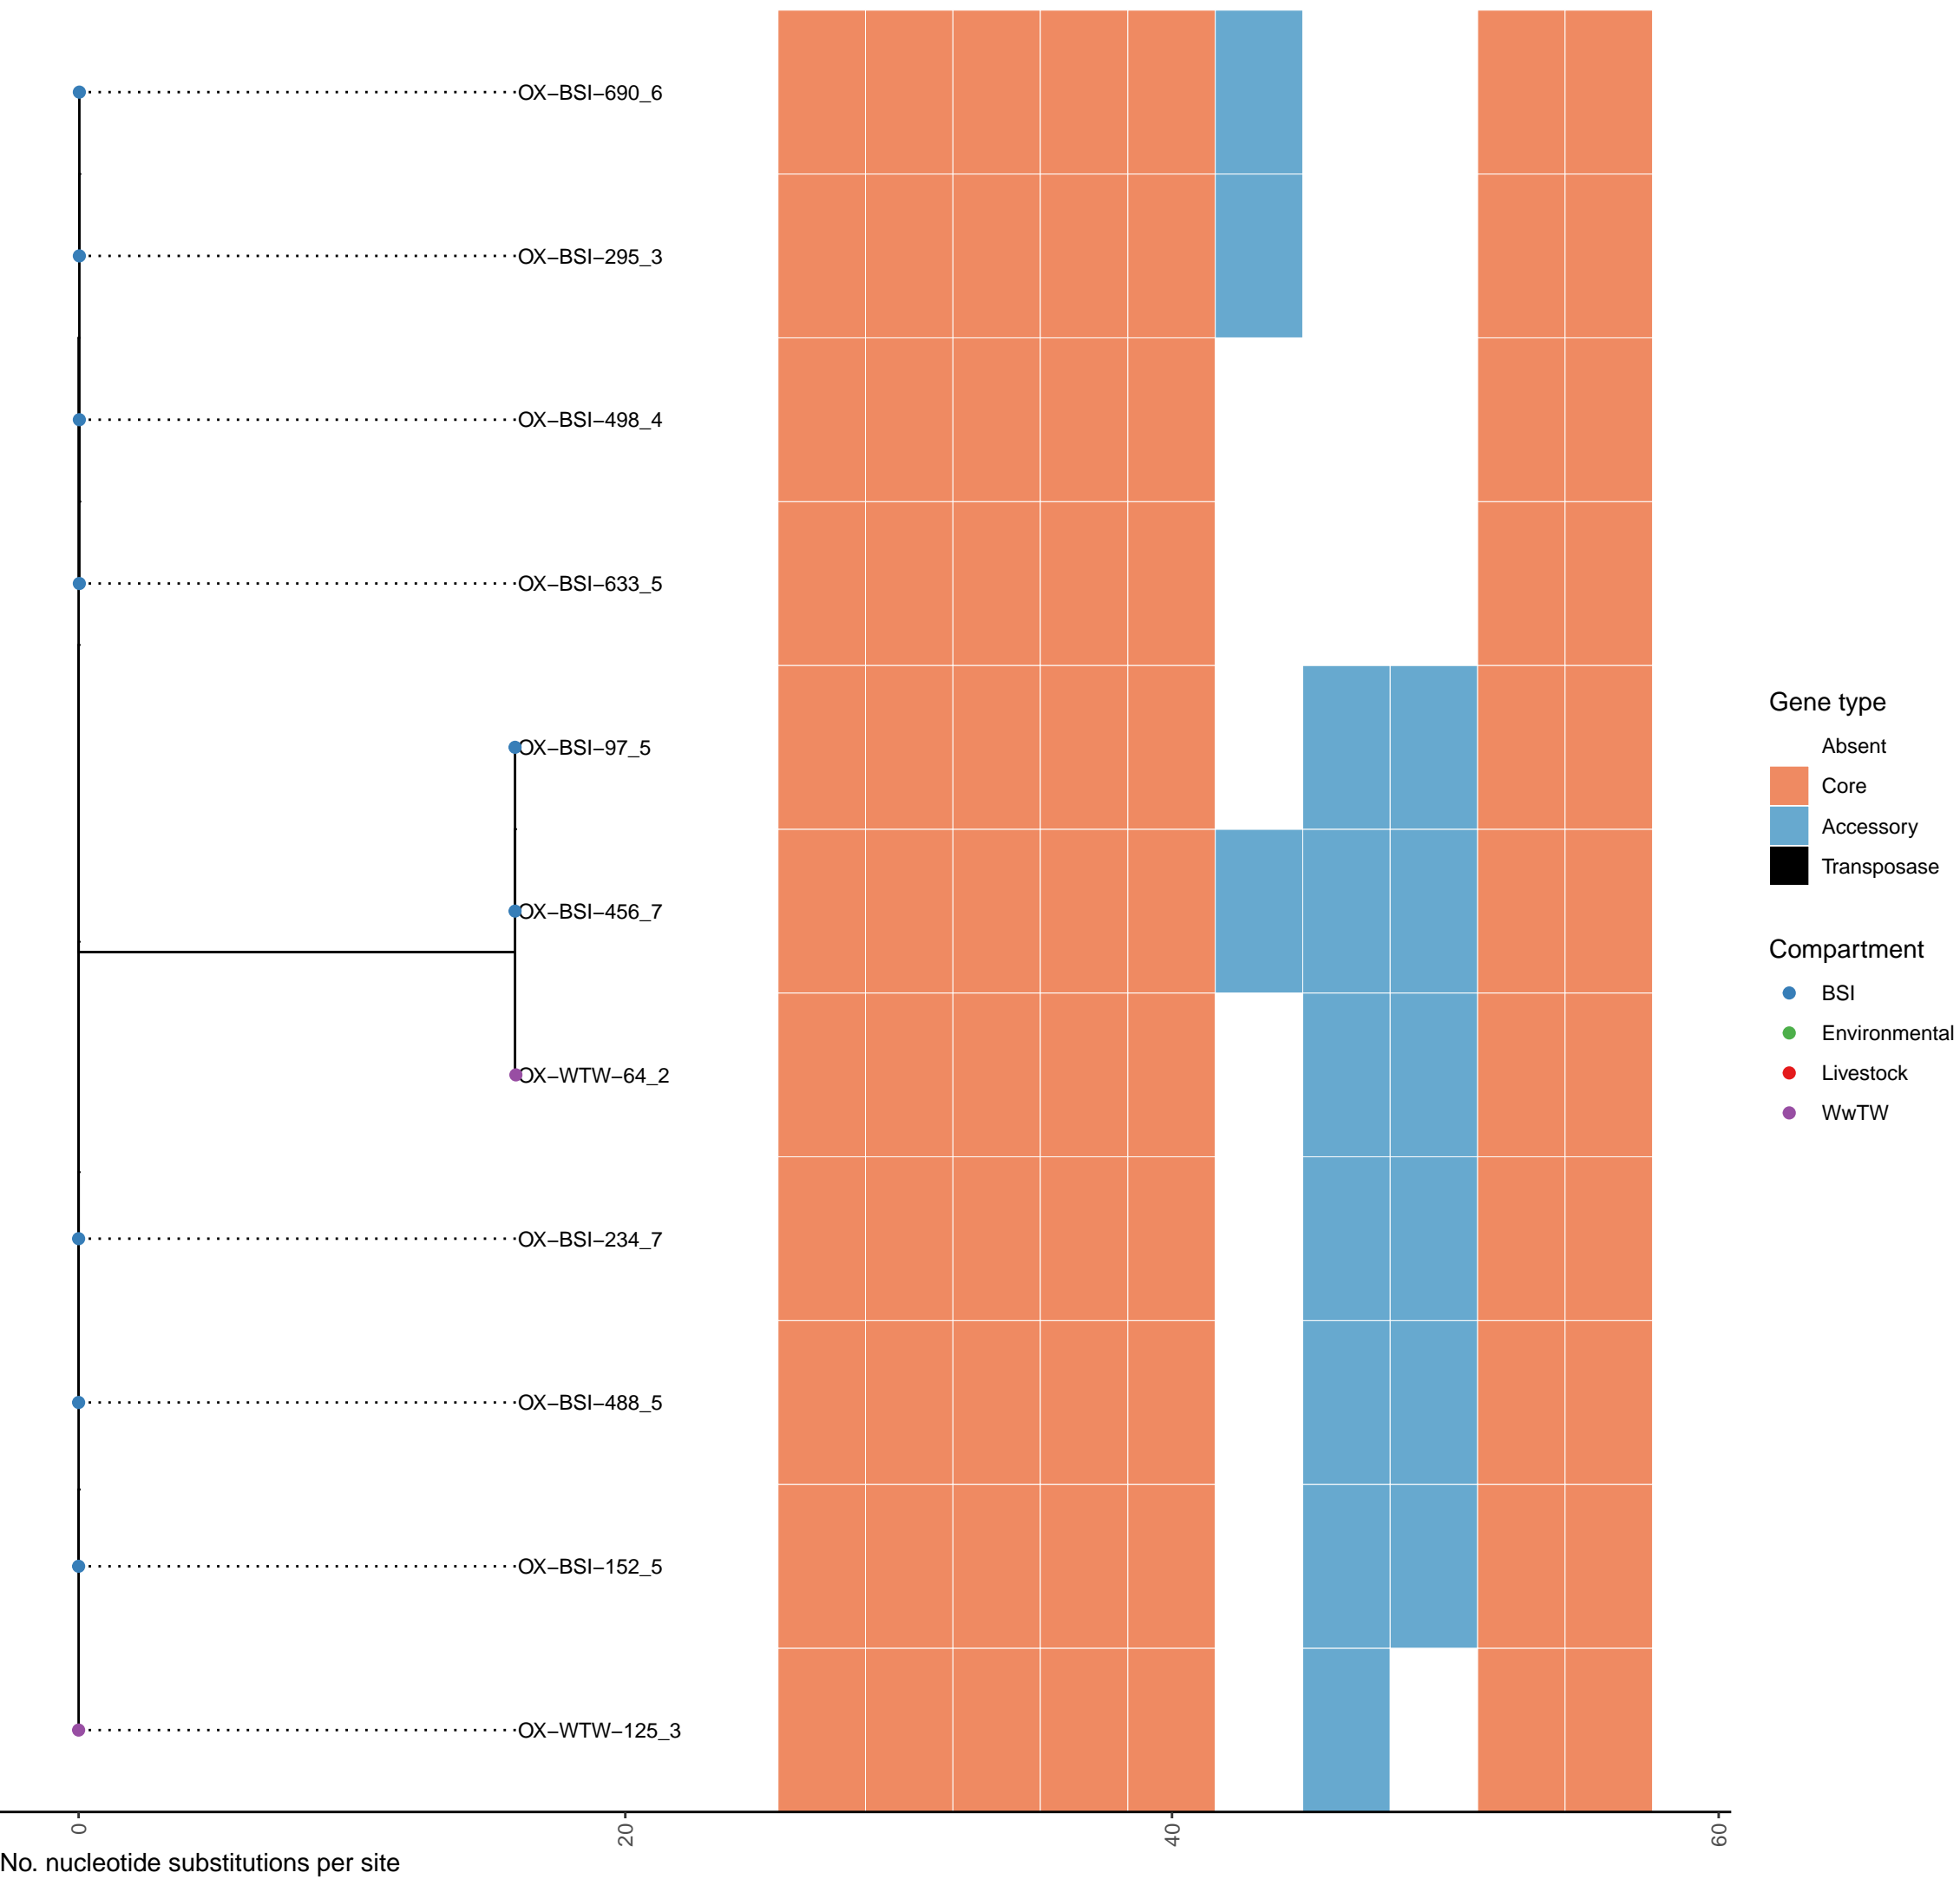

Cluster 55  
3 core genes  
3 accessory genes

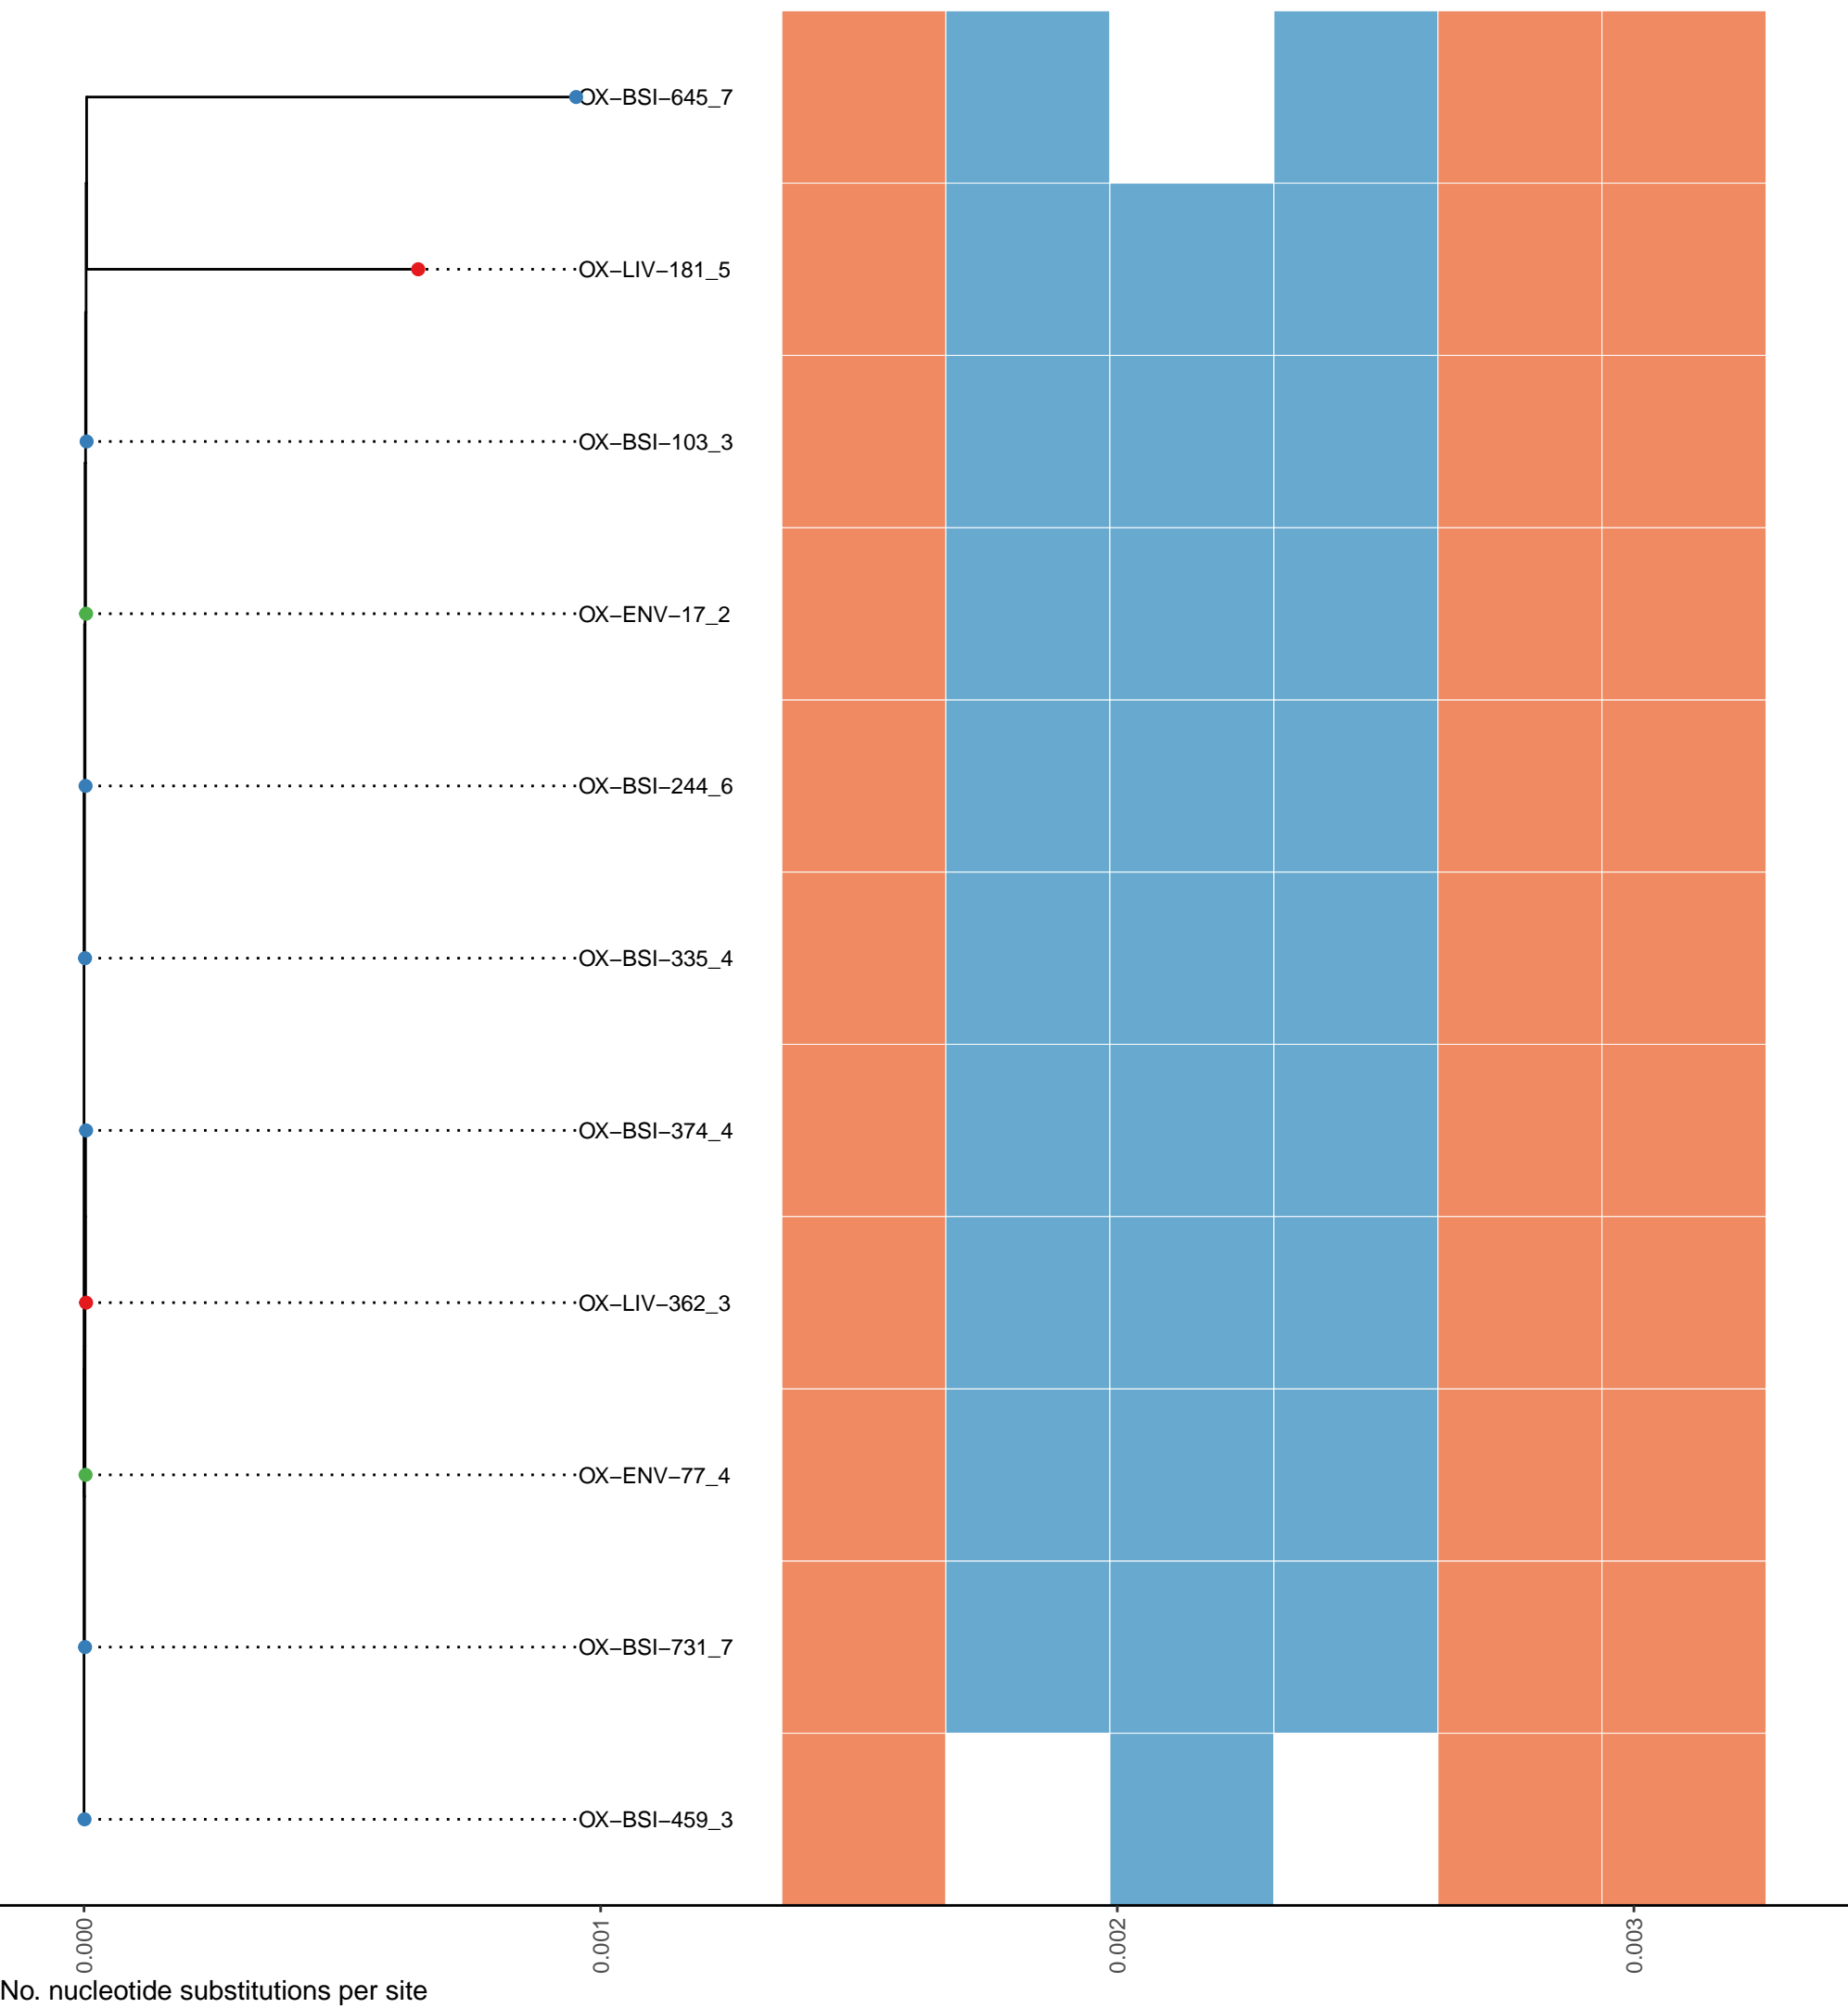

Gene type

- Absent
- Core
- Accessory
- Transposase

Compartment

- BSI
- Environmental
- Livestock
- WwTW

Cluster 56  
67 core genes  
468 accessory genes

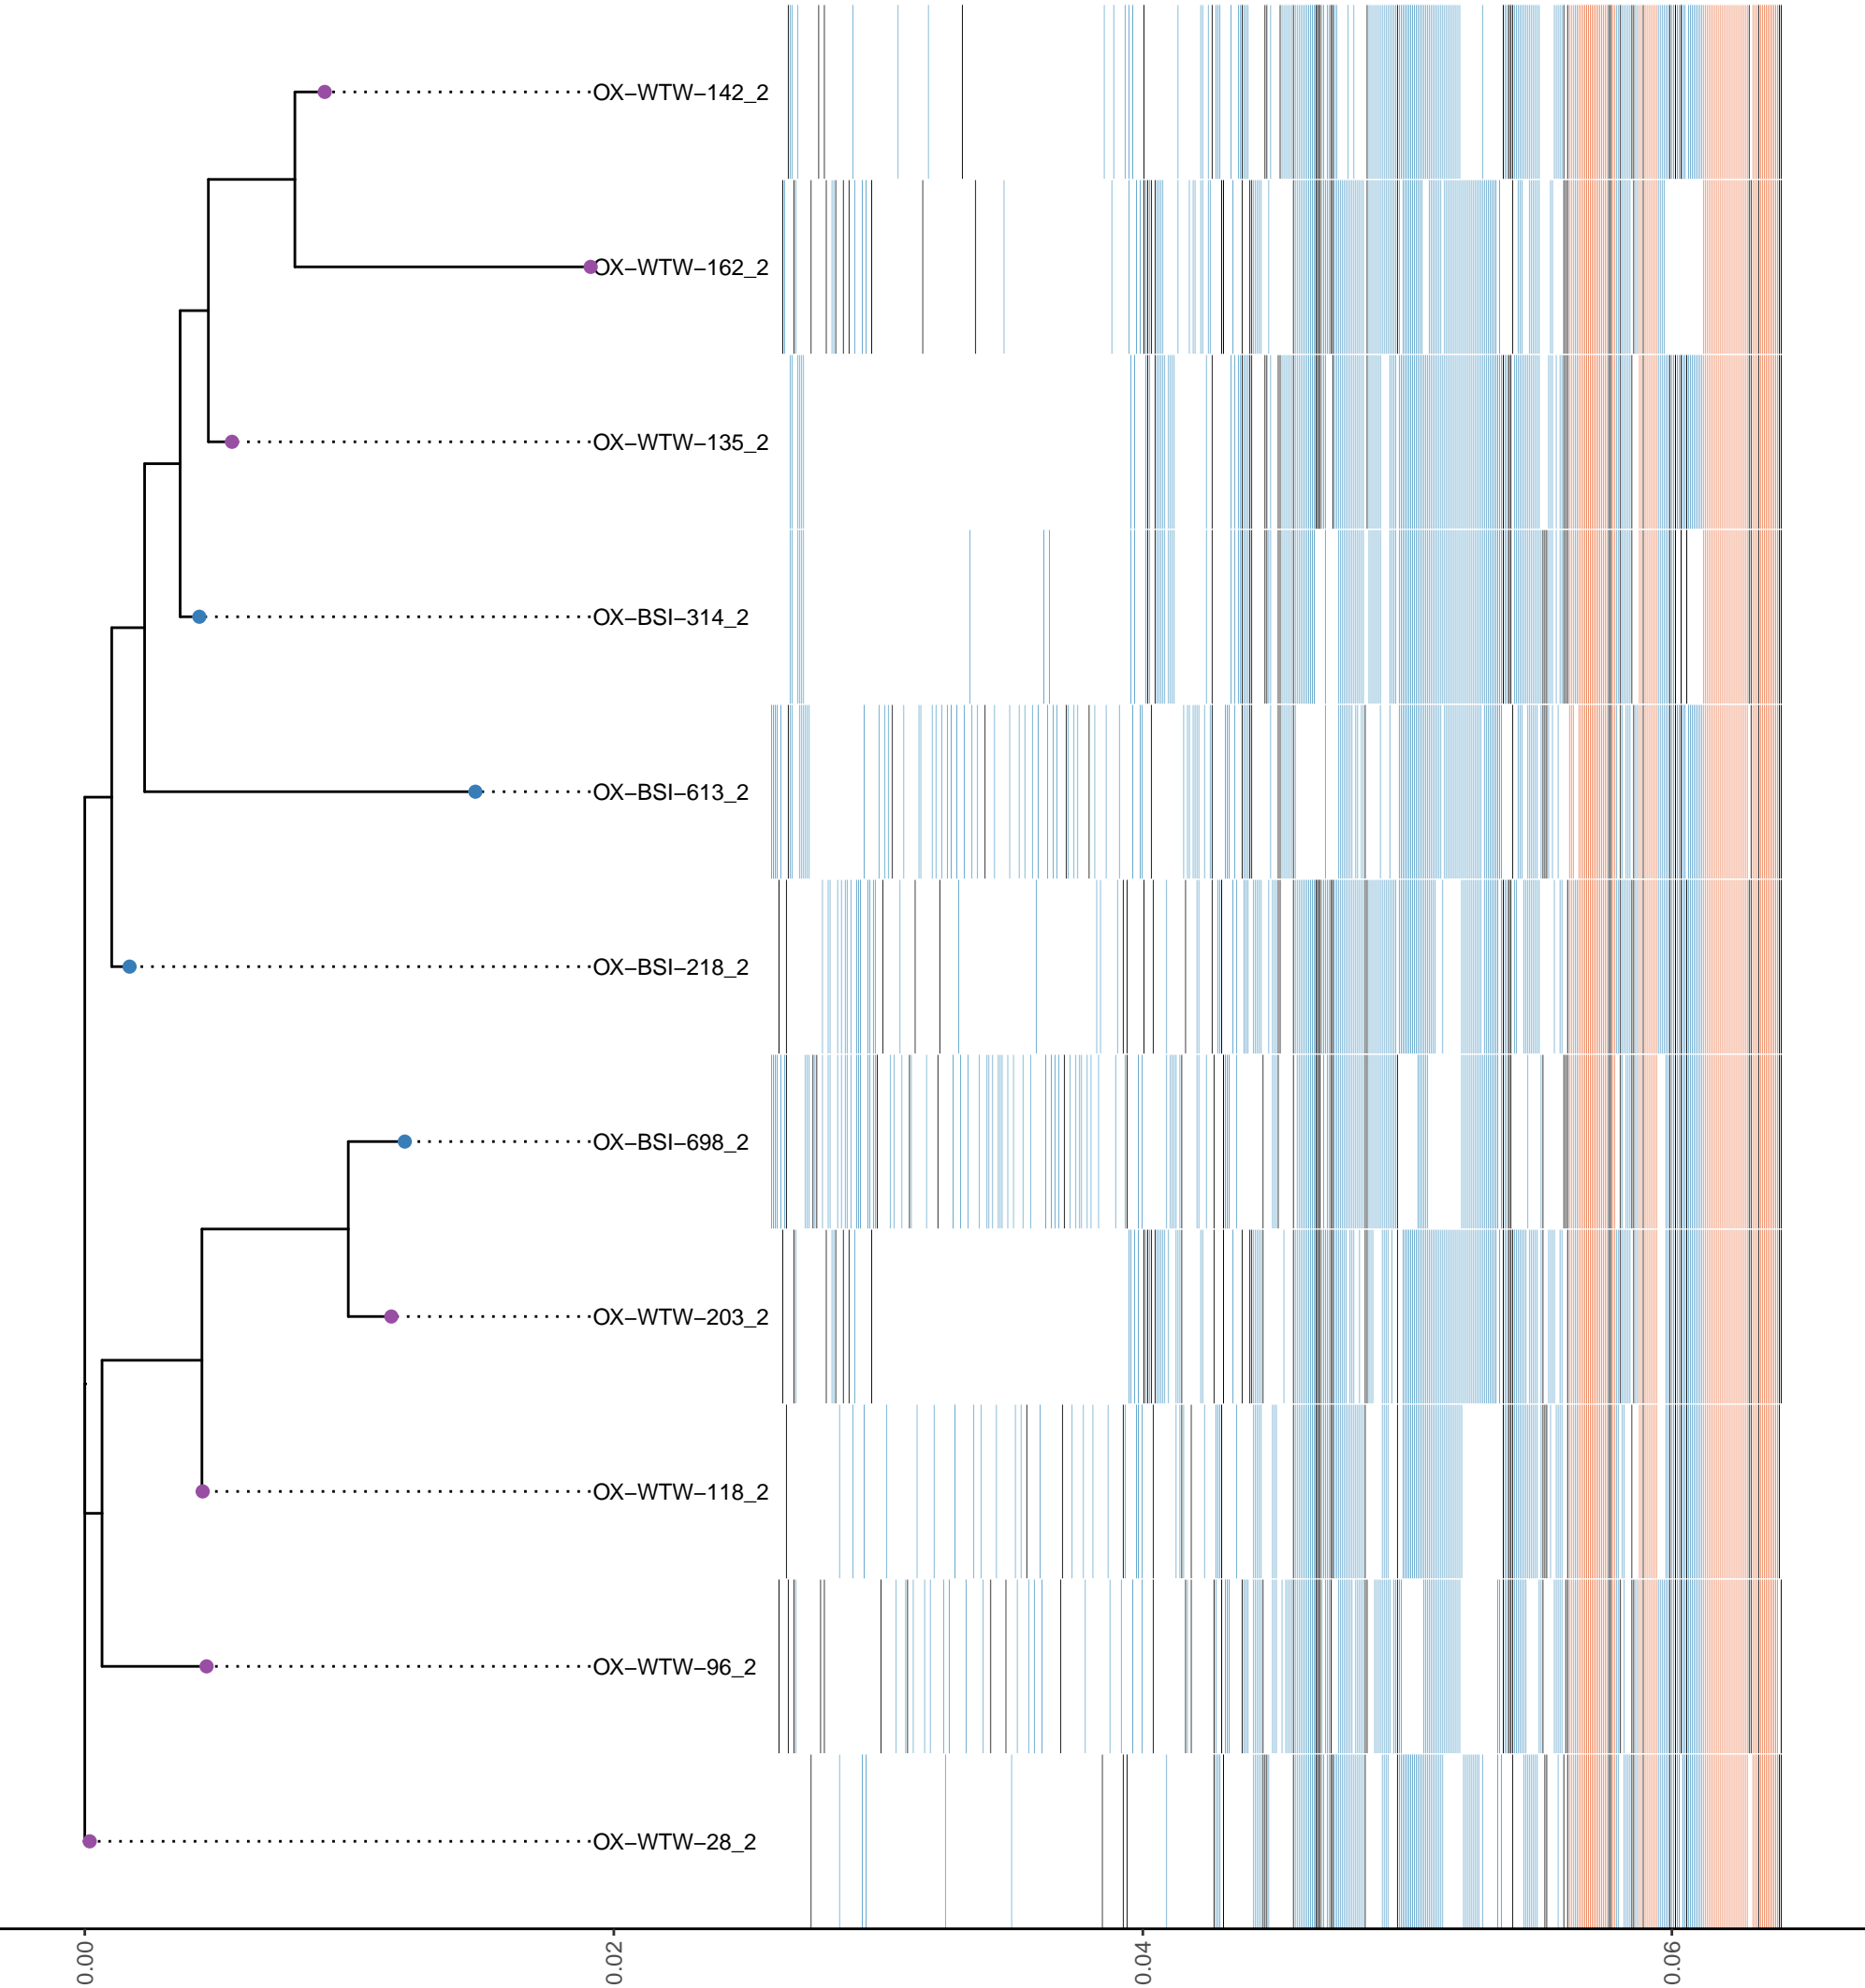

Gene type

- Absent
- Core
- Accessory
- Transposase

Compartment

- BSI
- Environmental
- Livestock
- WwTW

Cluster 57  
210 core genes  
46 accessory genes

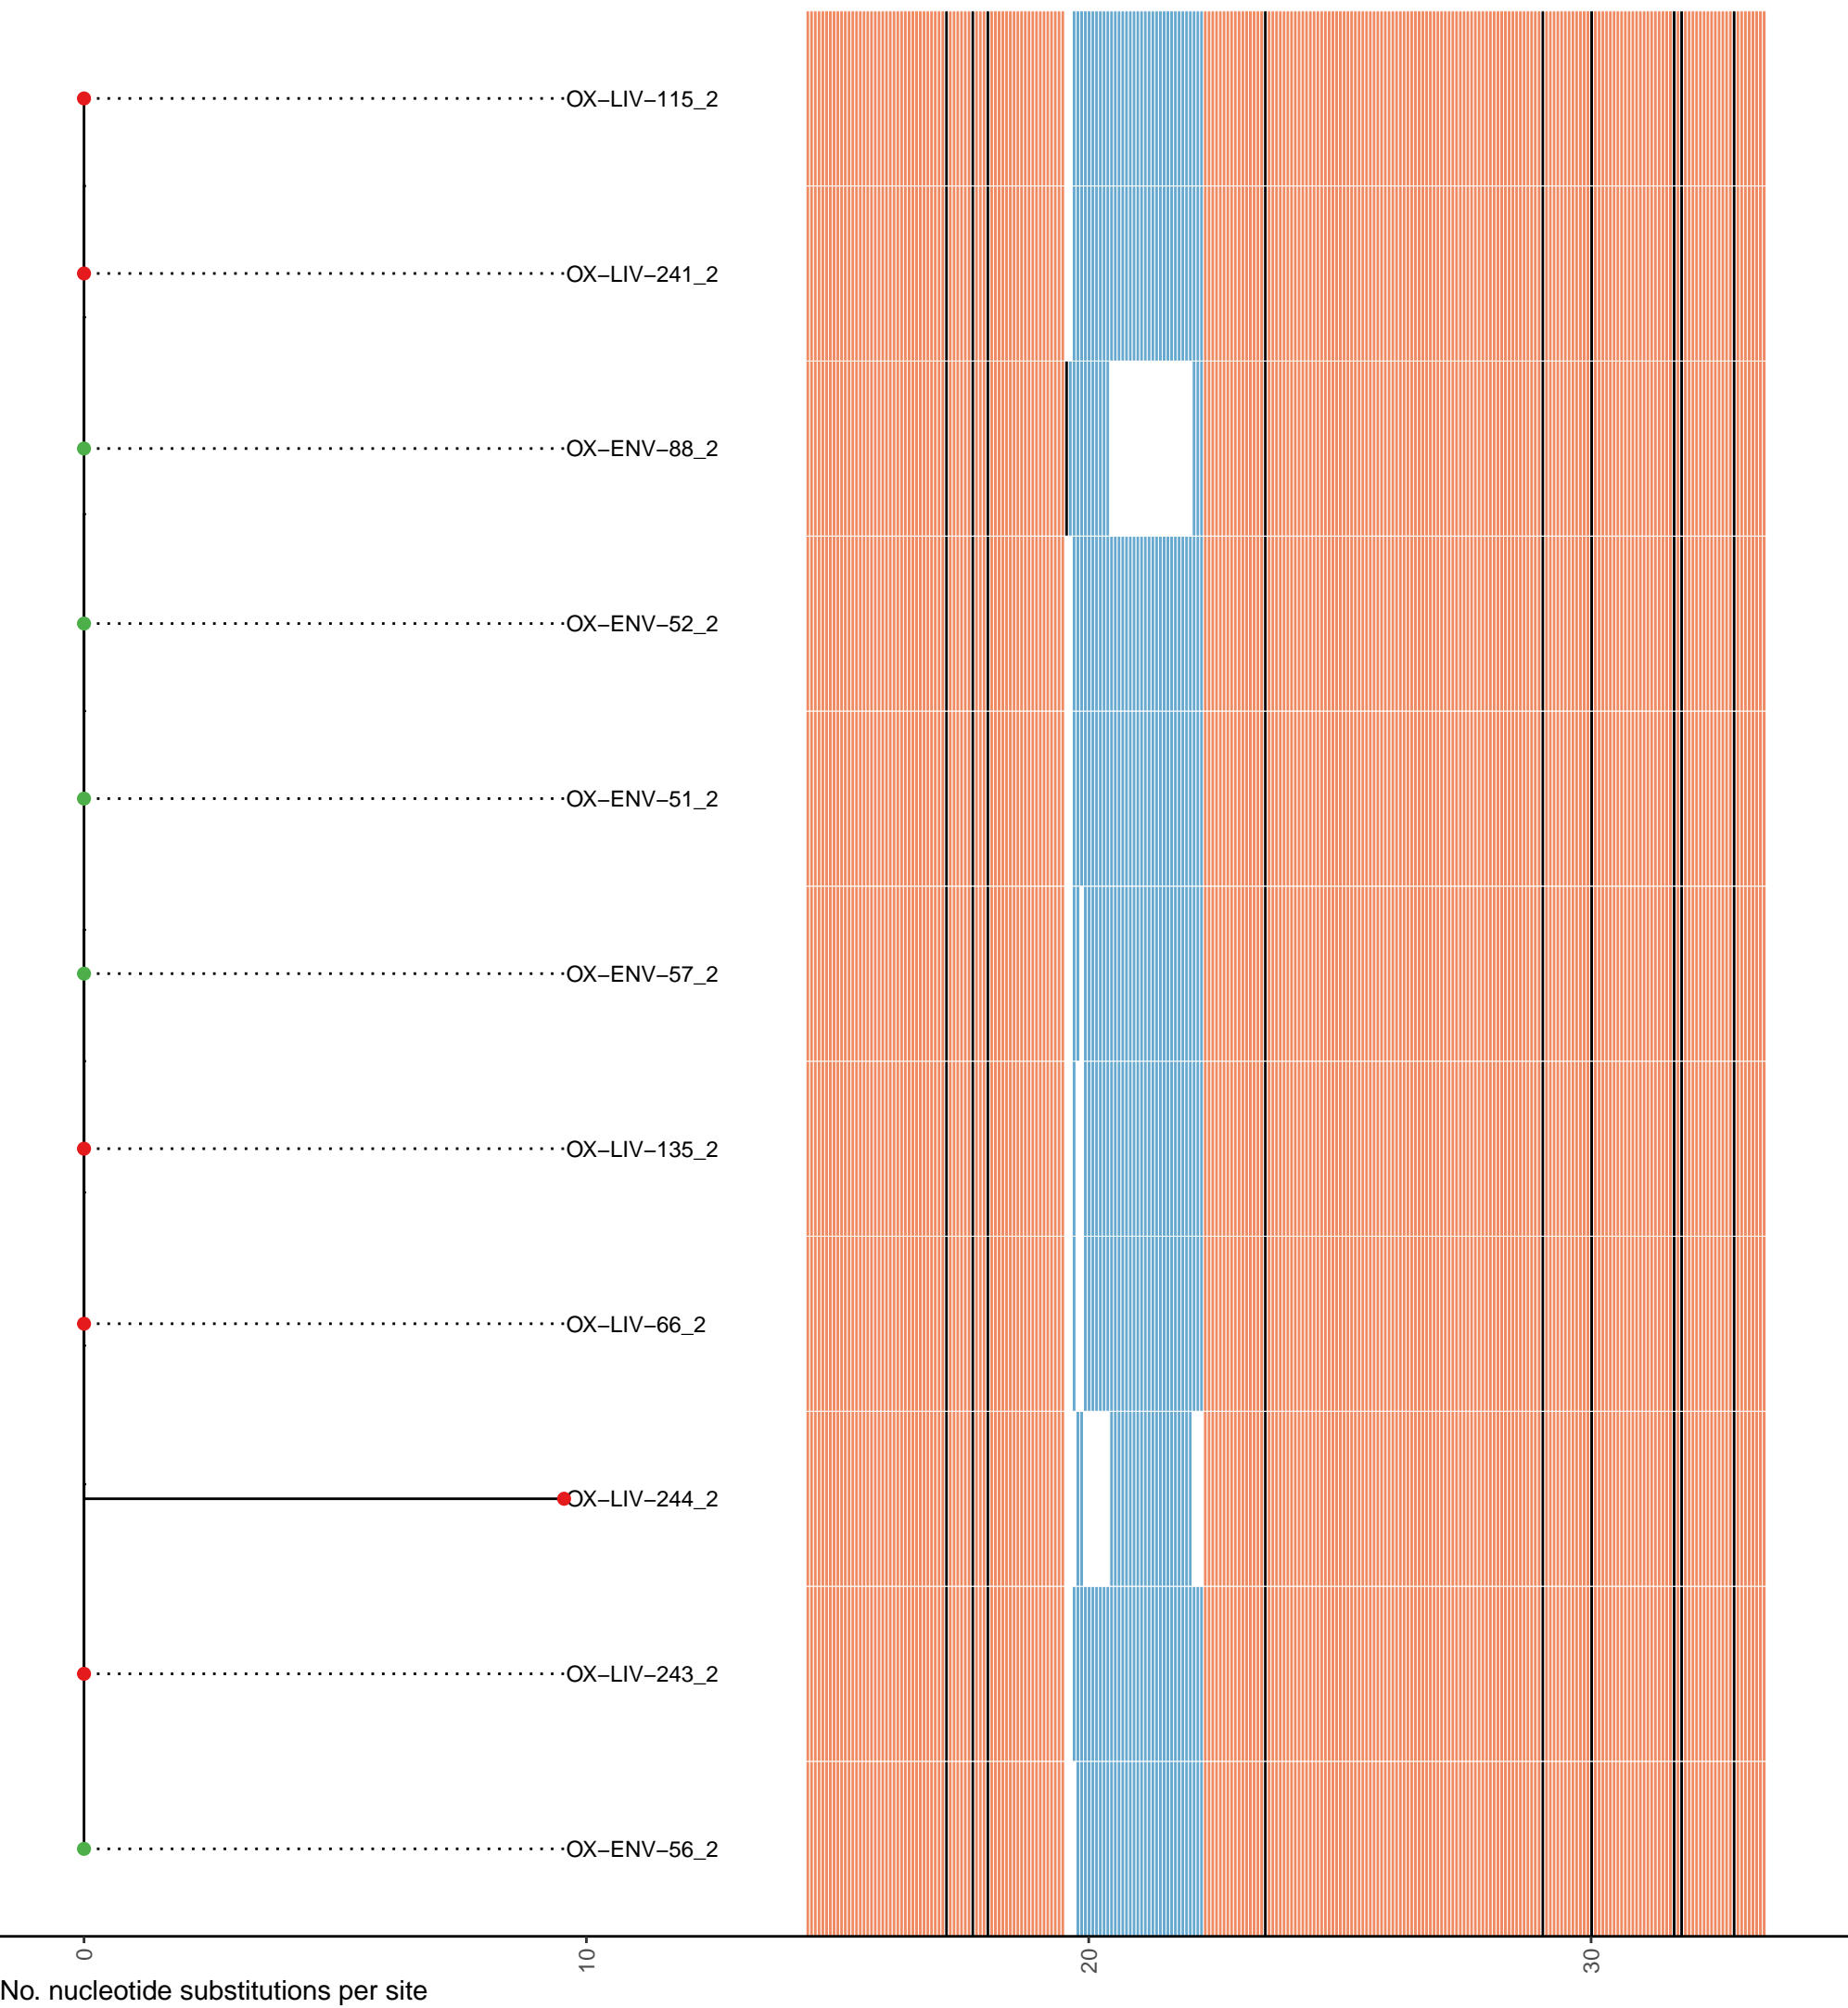

Cluster 58  
40 core genes  
68 accessory genes

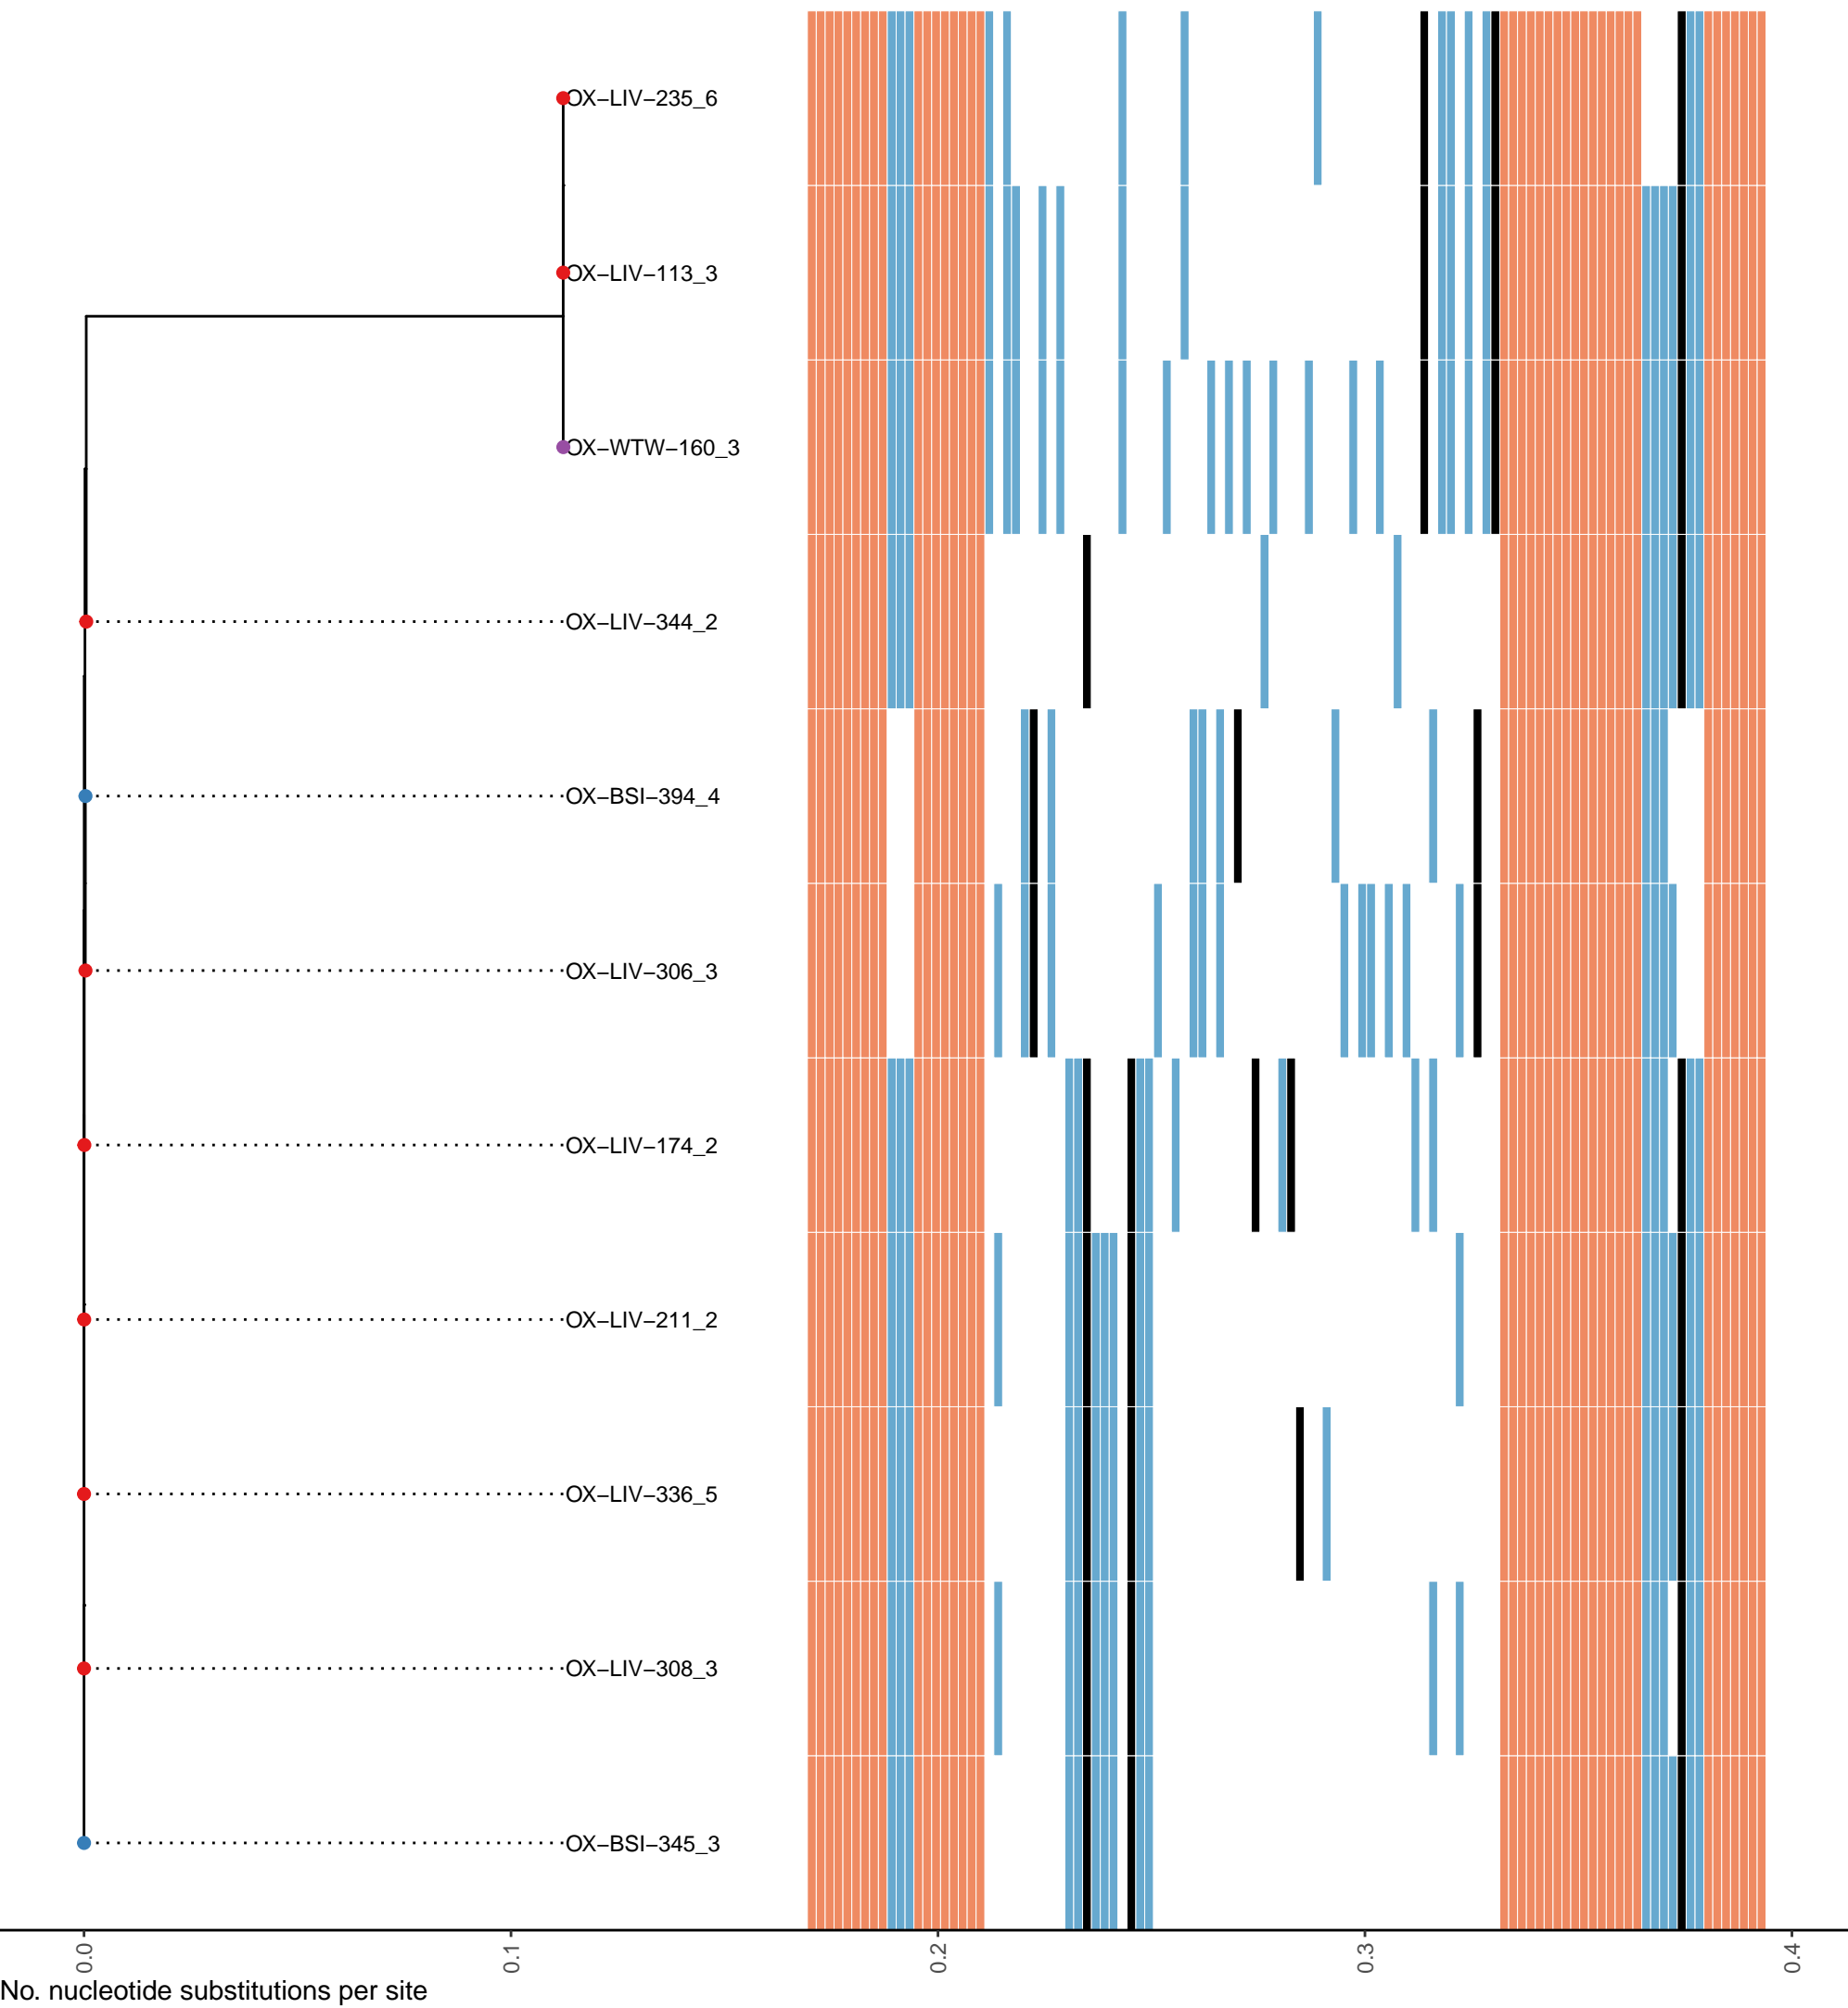

Cluster 59  
37 core genes  
266 accessory genes

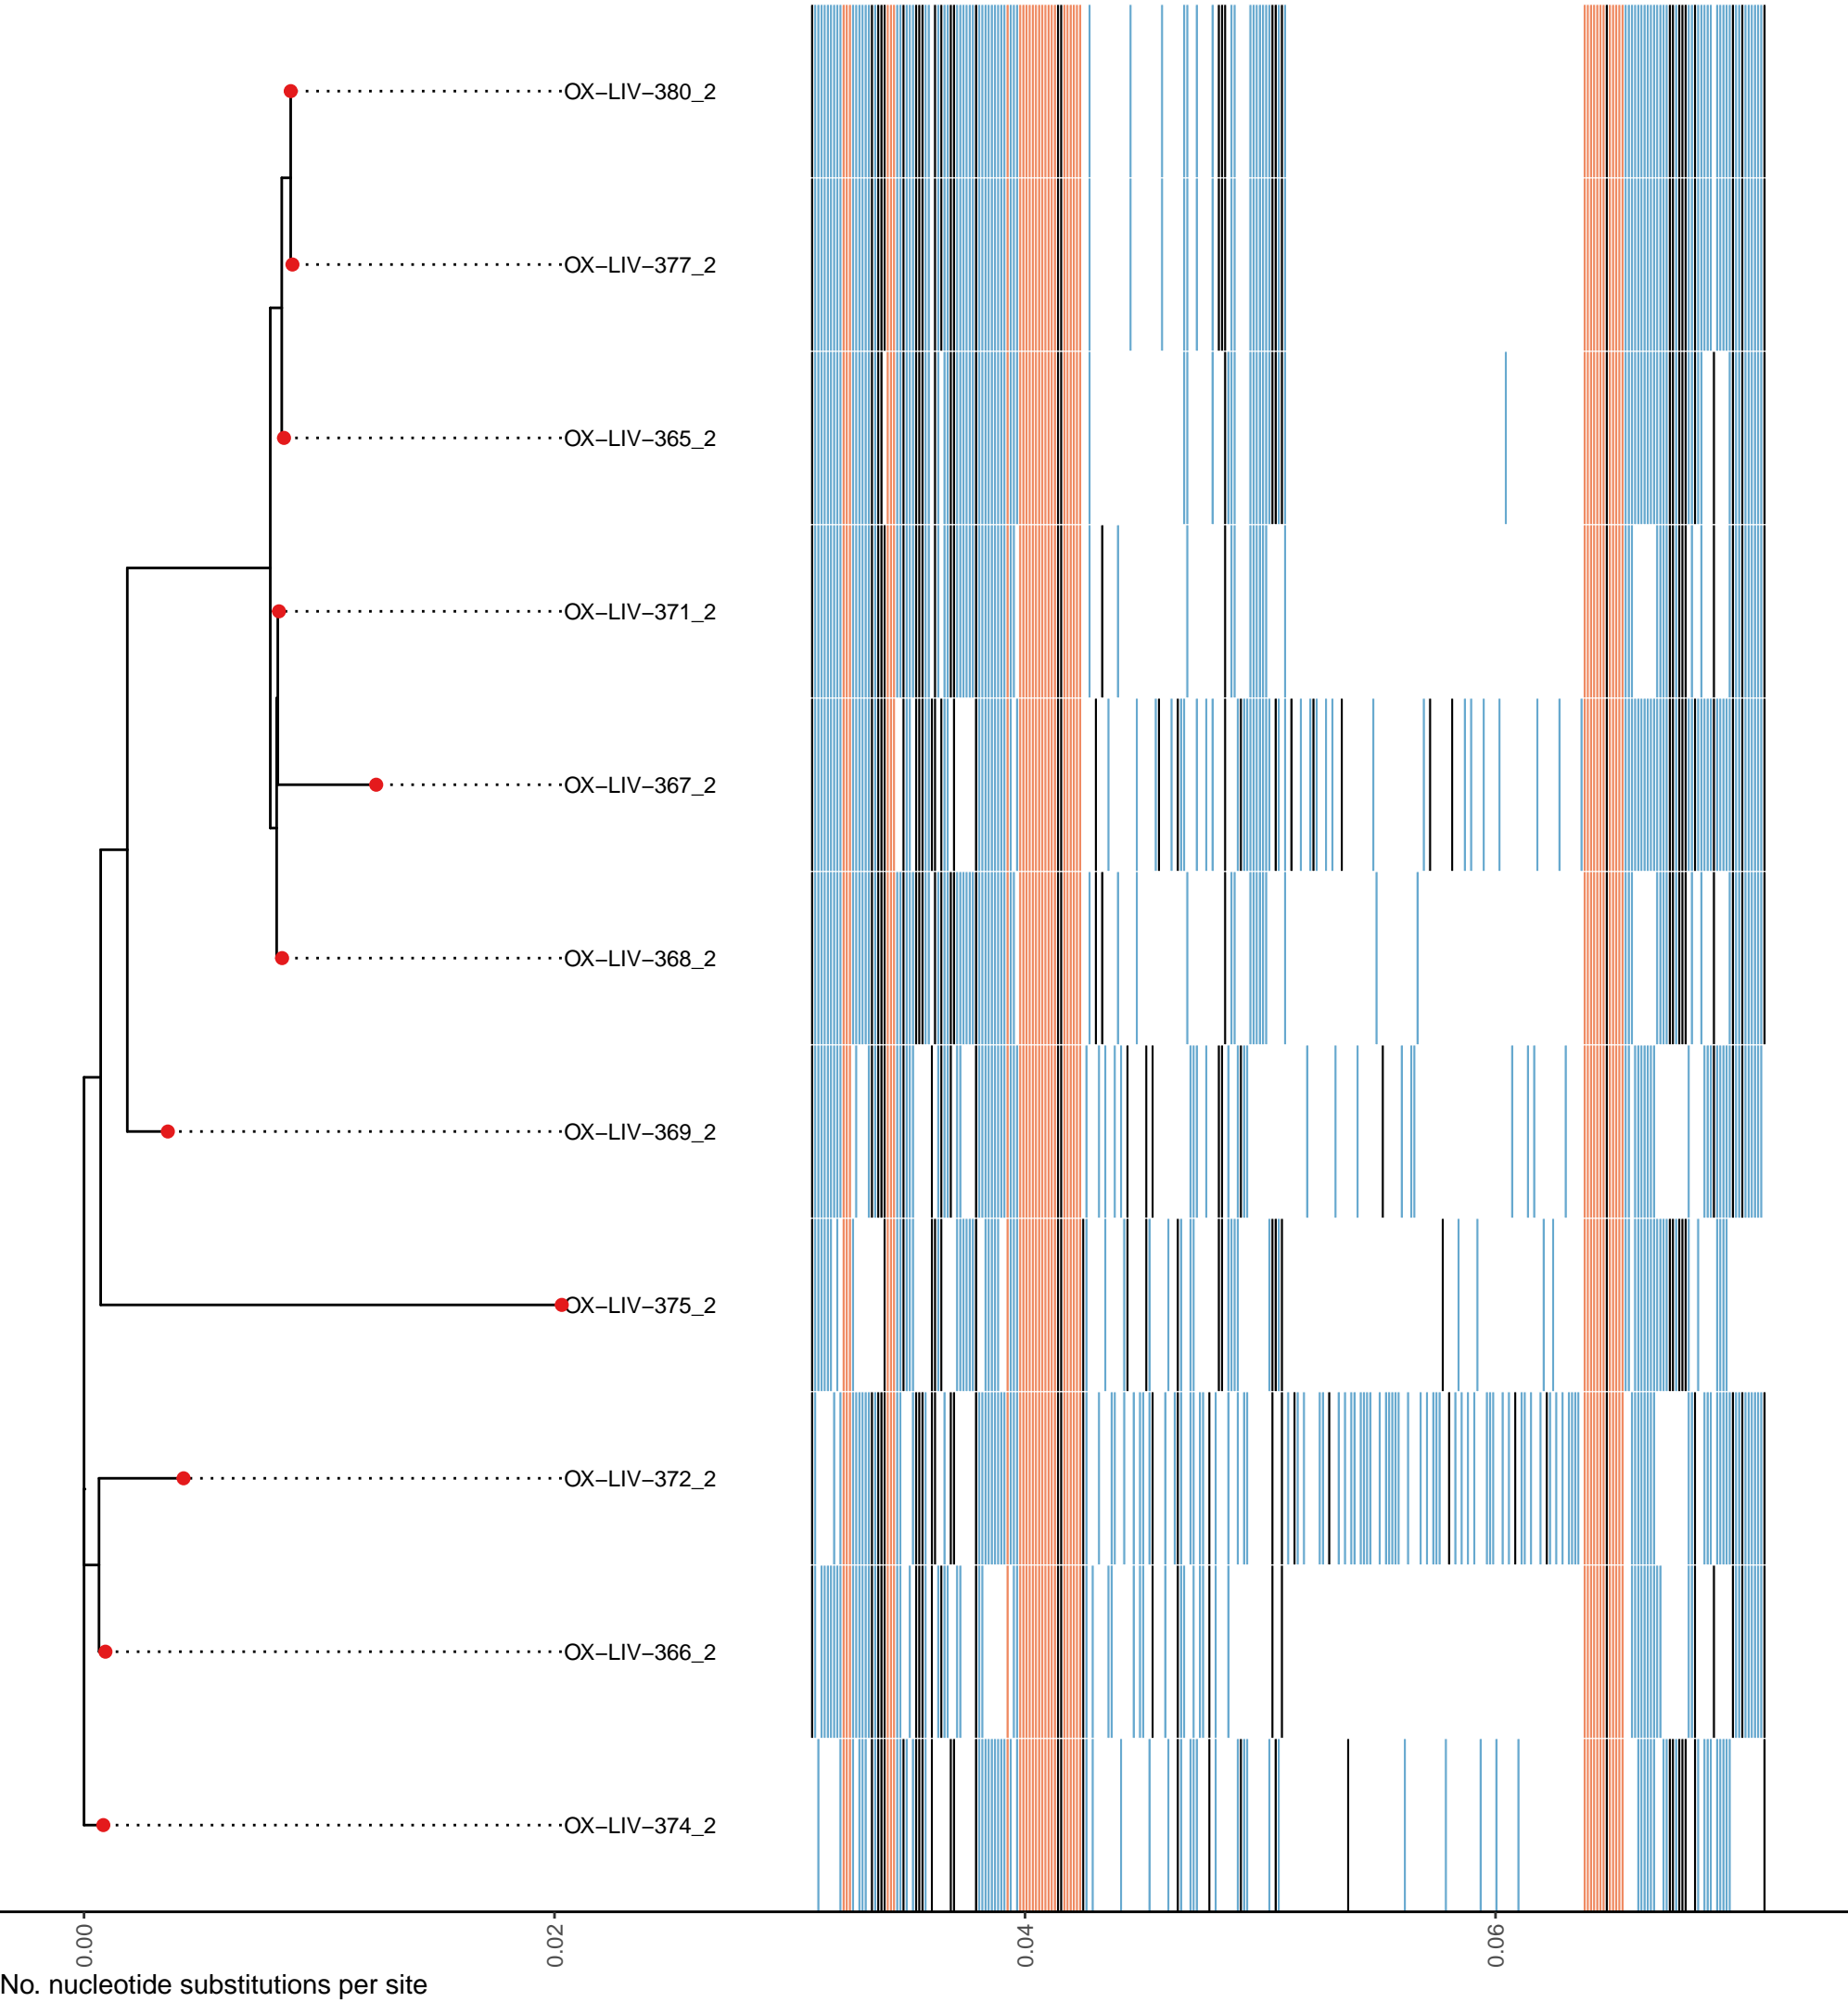

Gene type

- Absent
- Core
- Accessory
- Transposase

Compartment

- BSI
- Environmental
- Livestock
- WwTW

Cluster 60  
34 core genes  
18 accessory genes

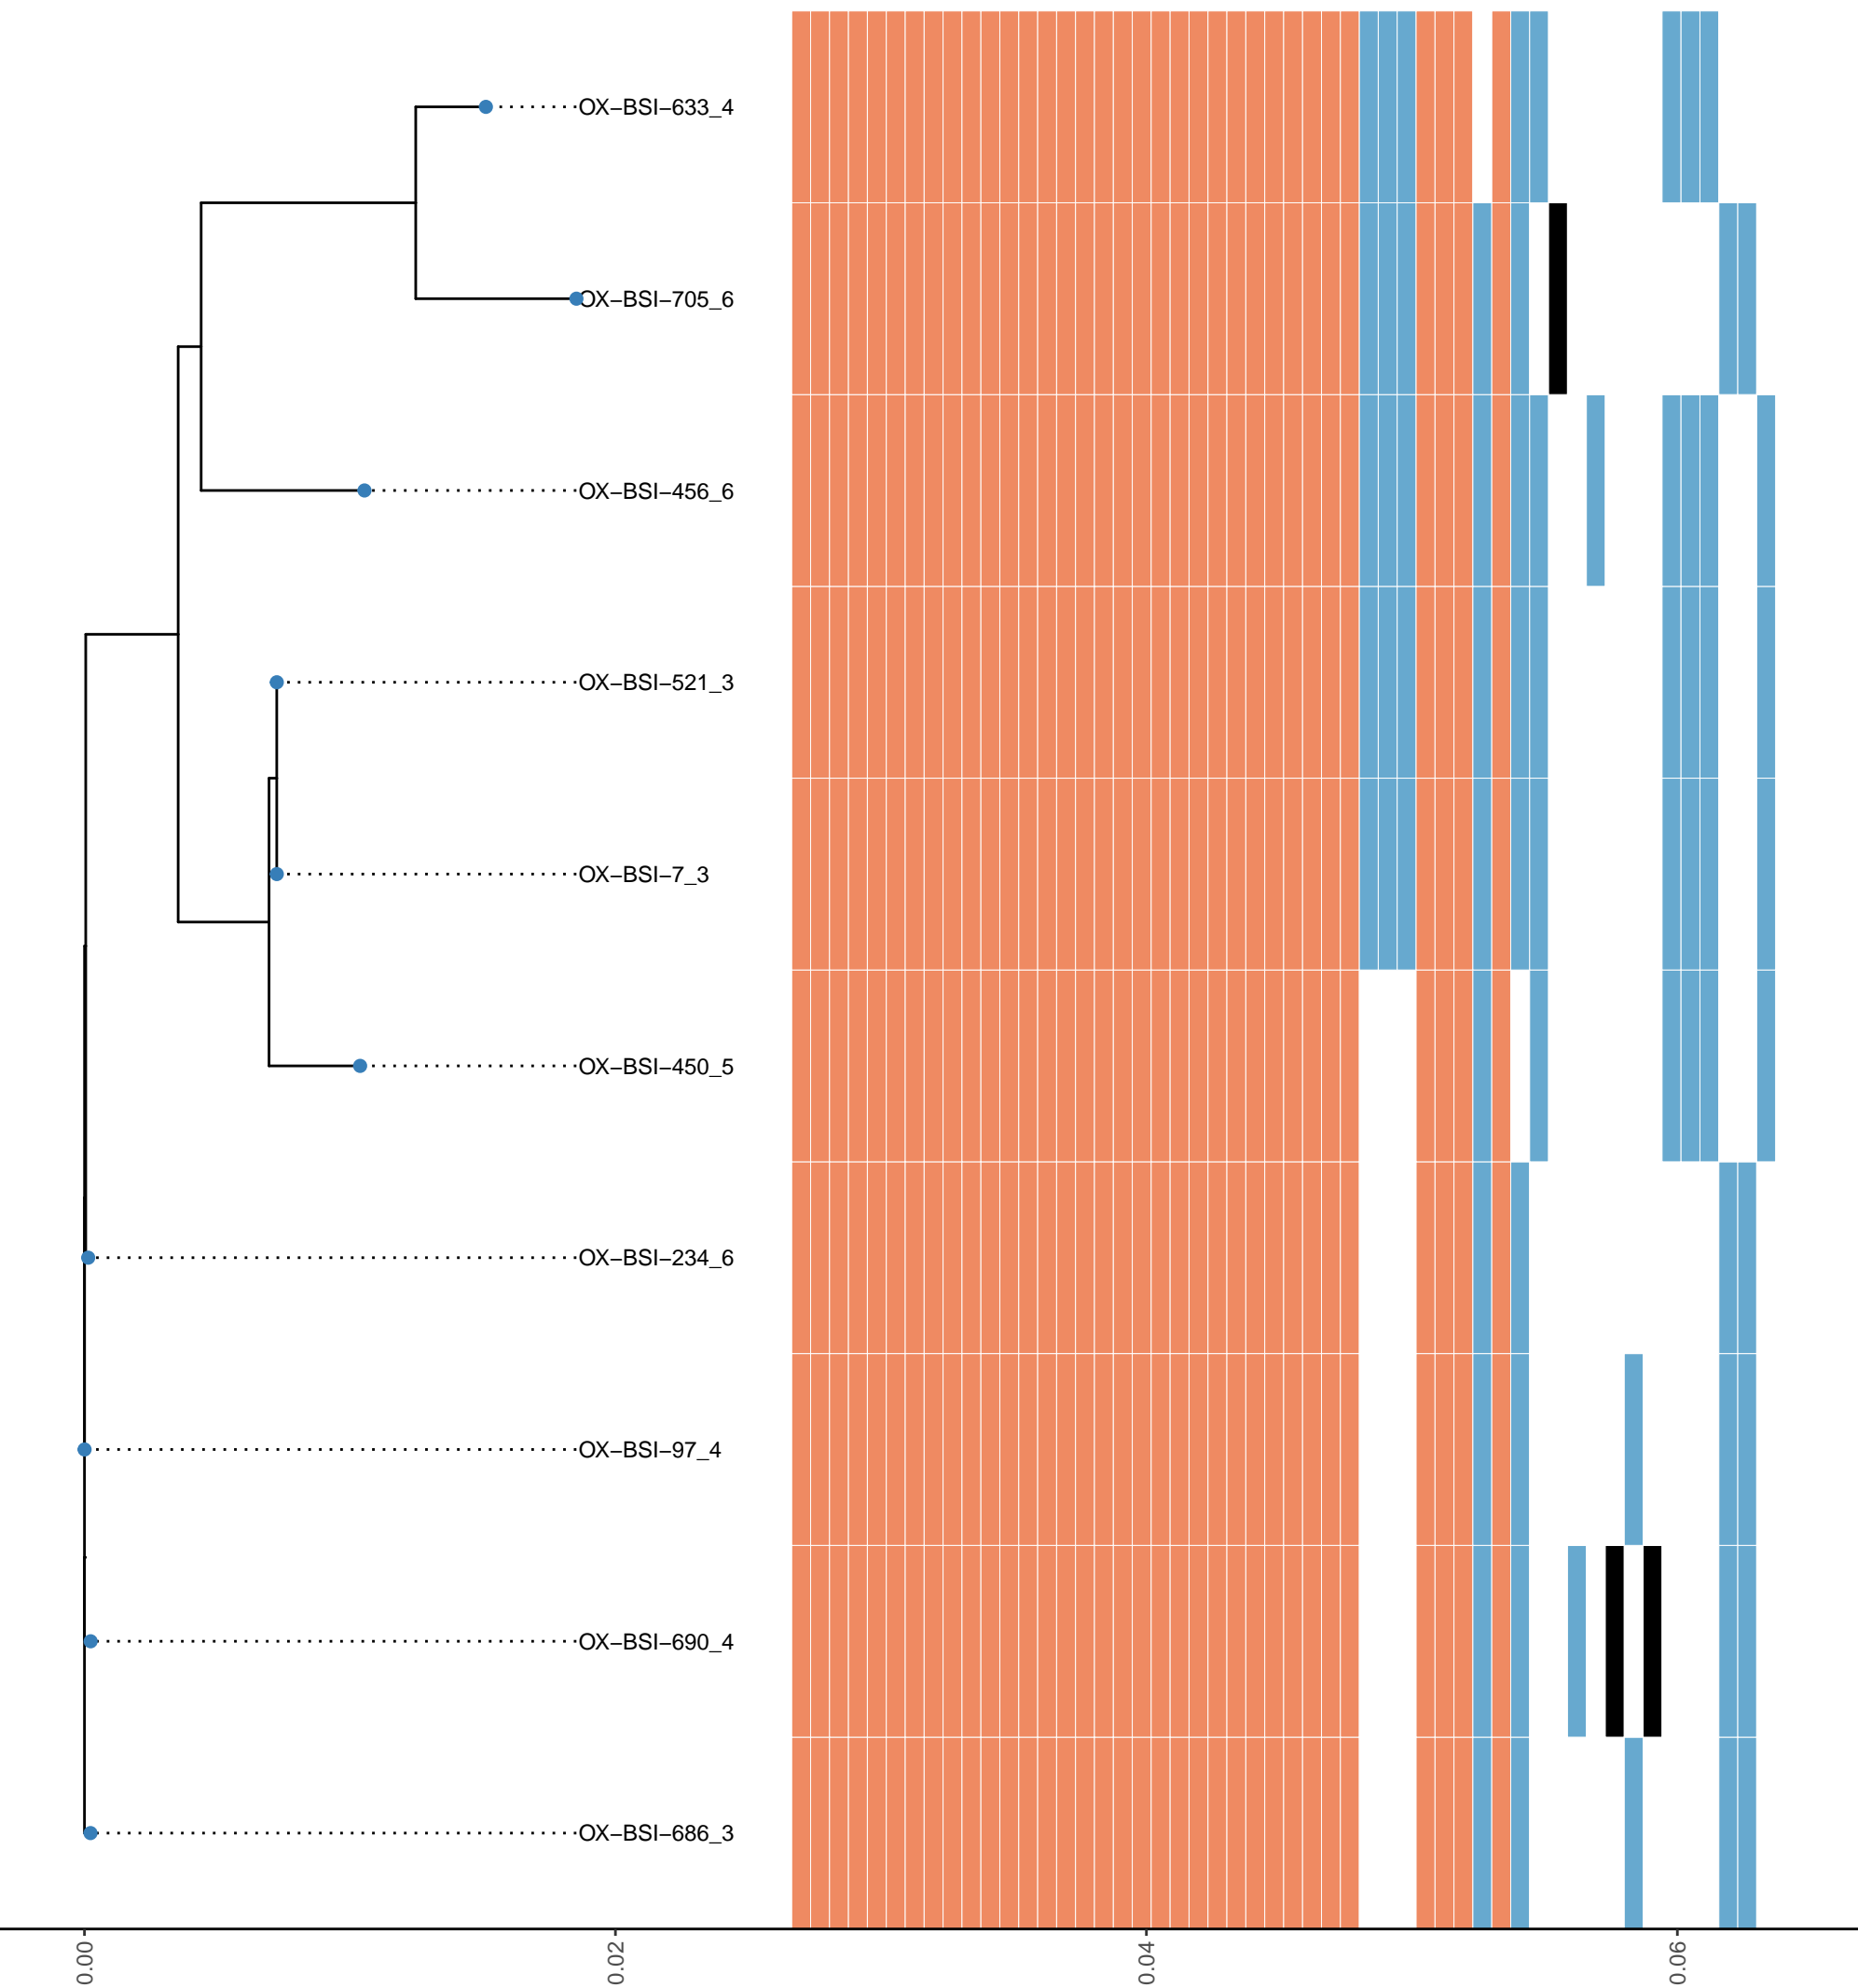

Gene type

- Absent
- Core
- Accessory
- Transposase

Compartment

- BSI
- Environmental
- Livestock
- WwTW

No. nucleotide substitutions per site

Cluster 61  
5 core genes  
4 accessory genes

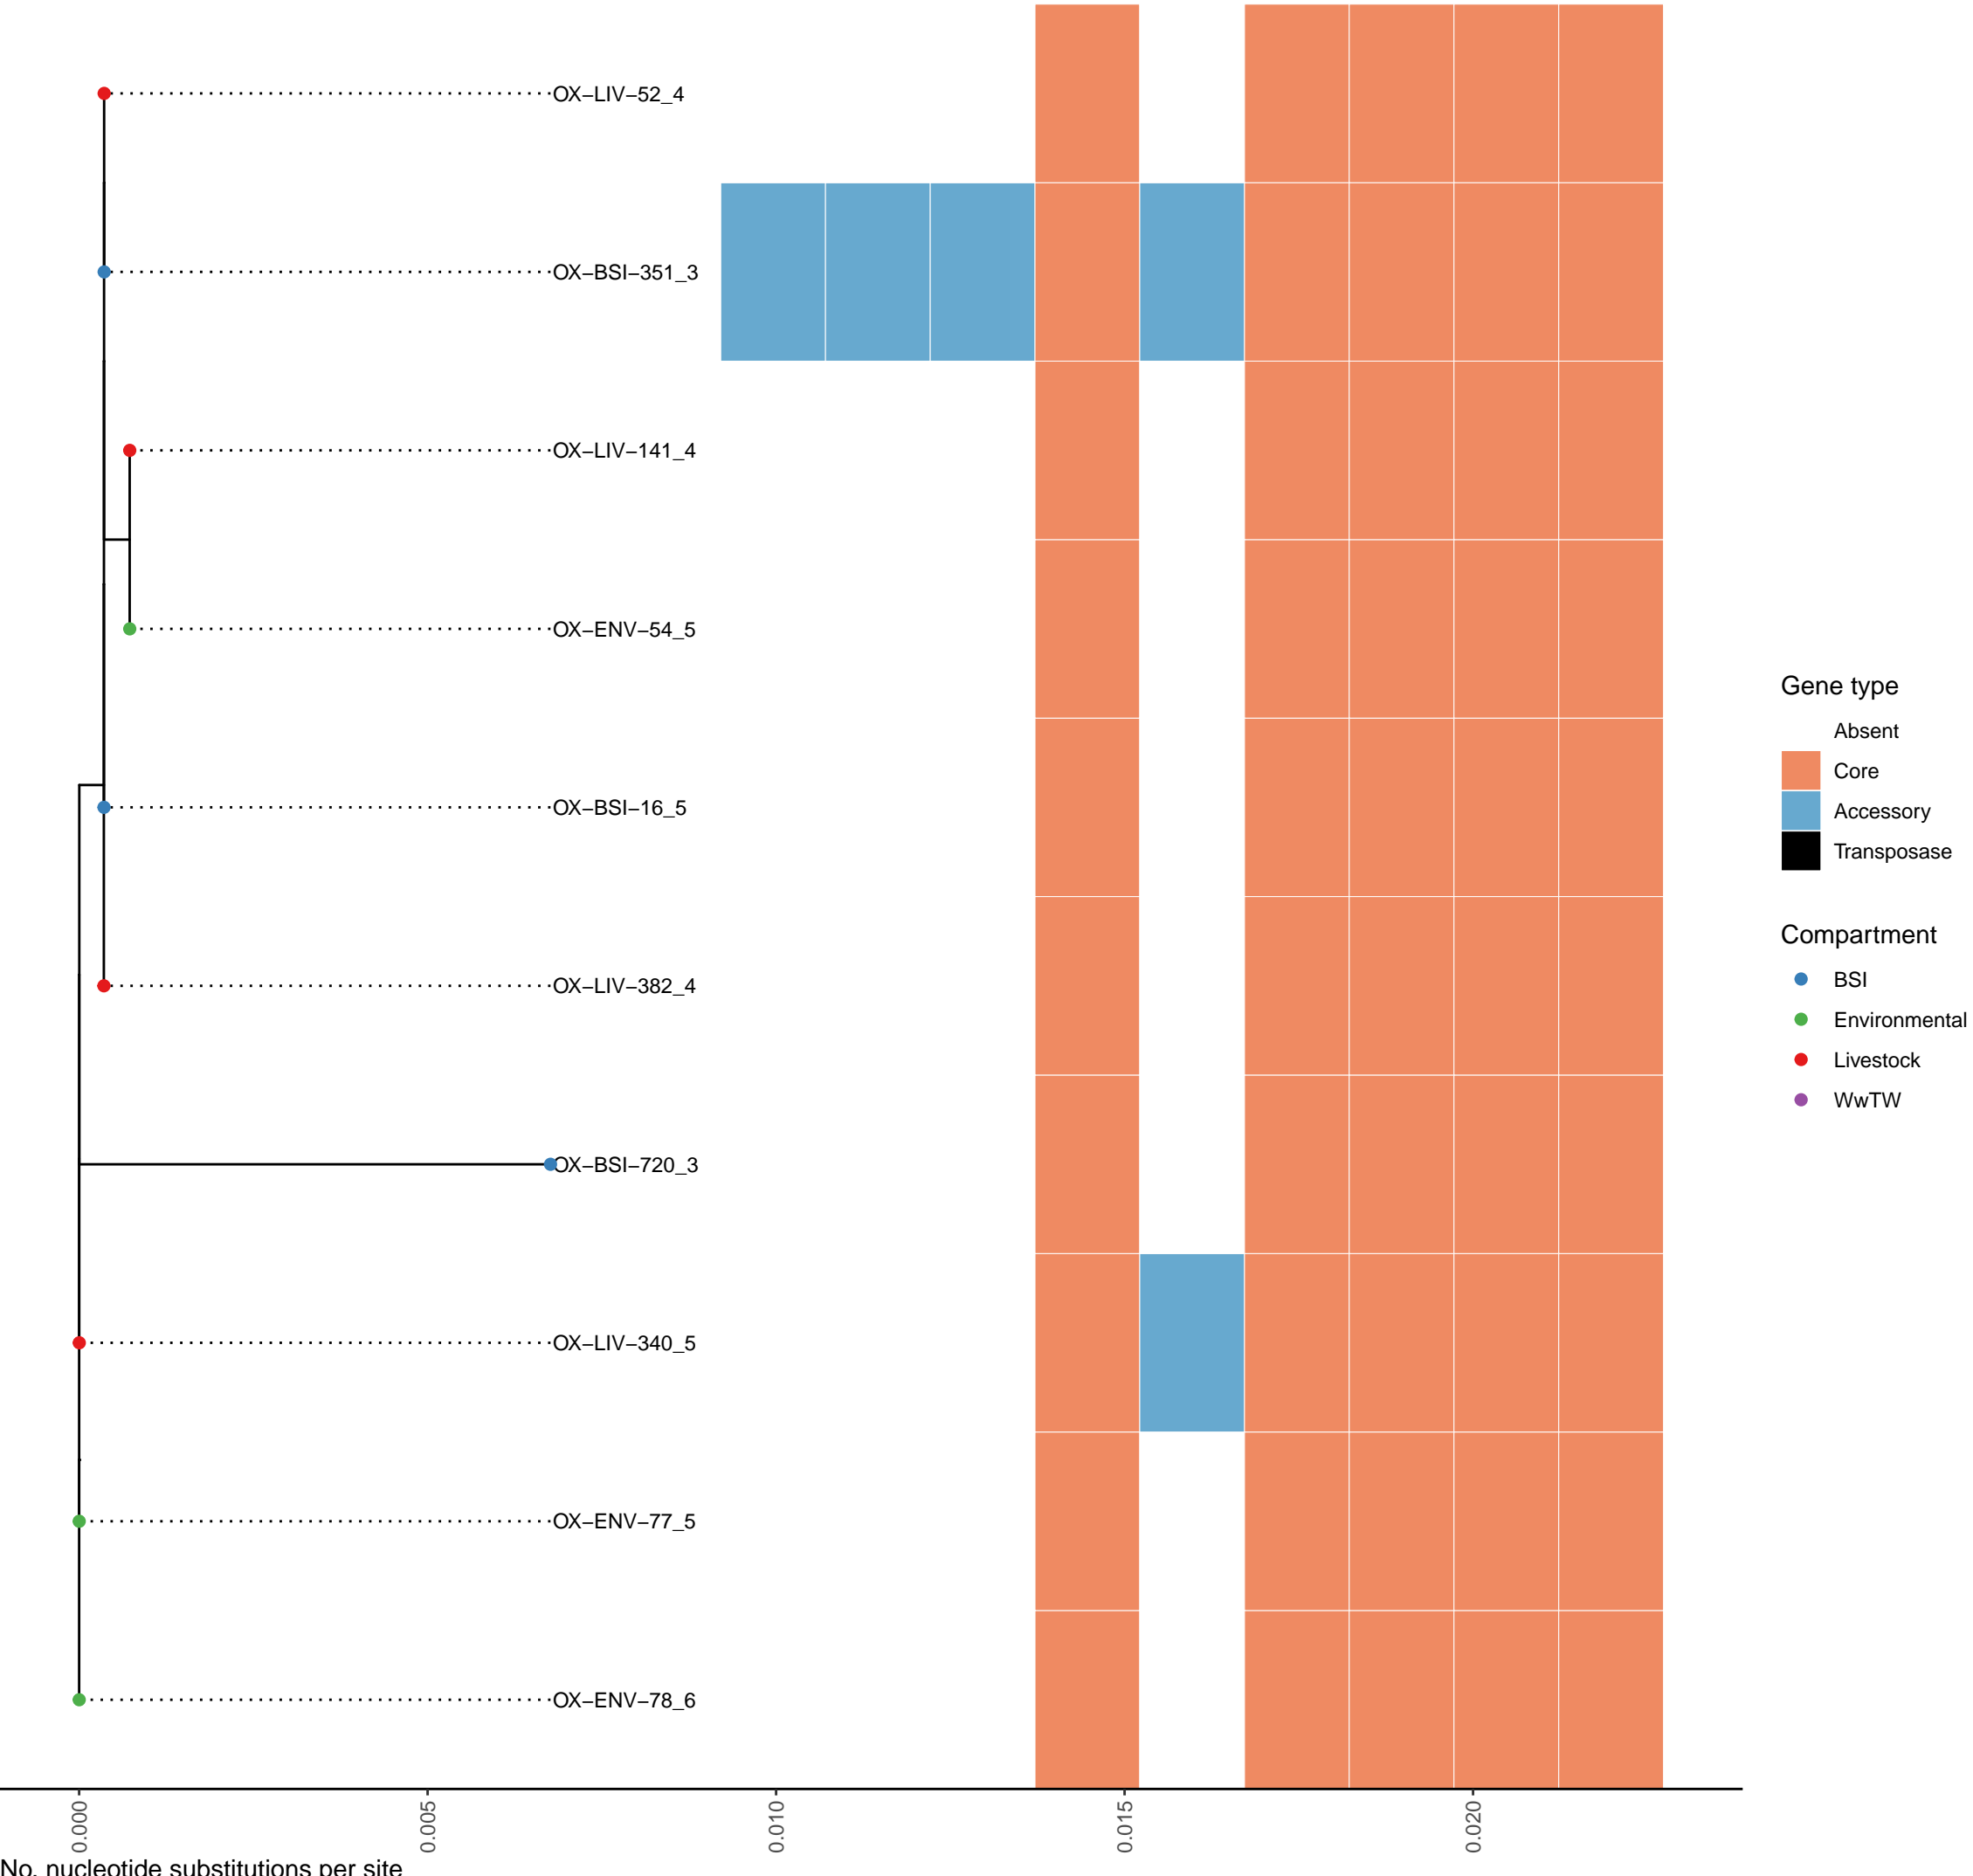

Cluster 62  
4 core genes  
0 accessory genes

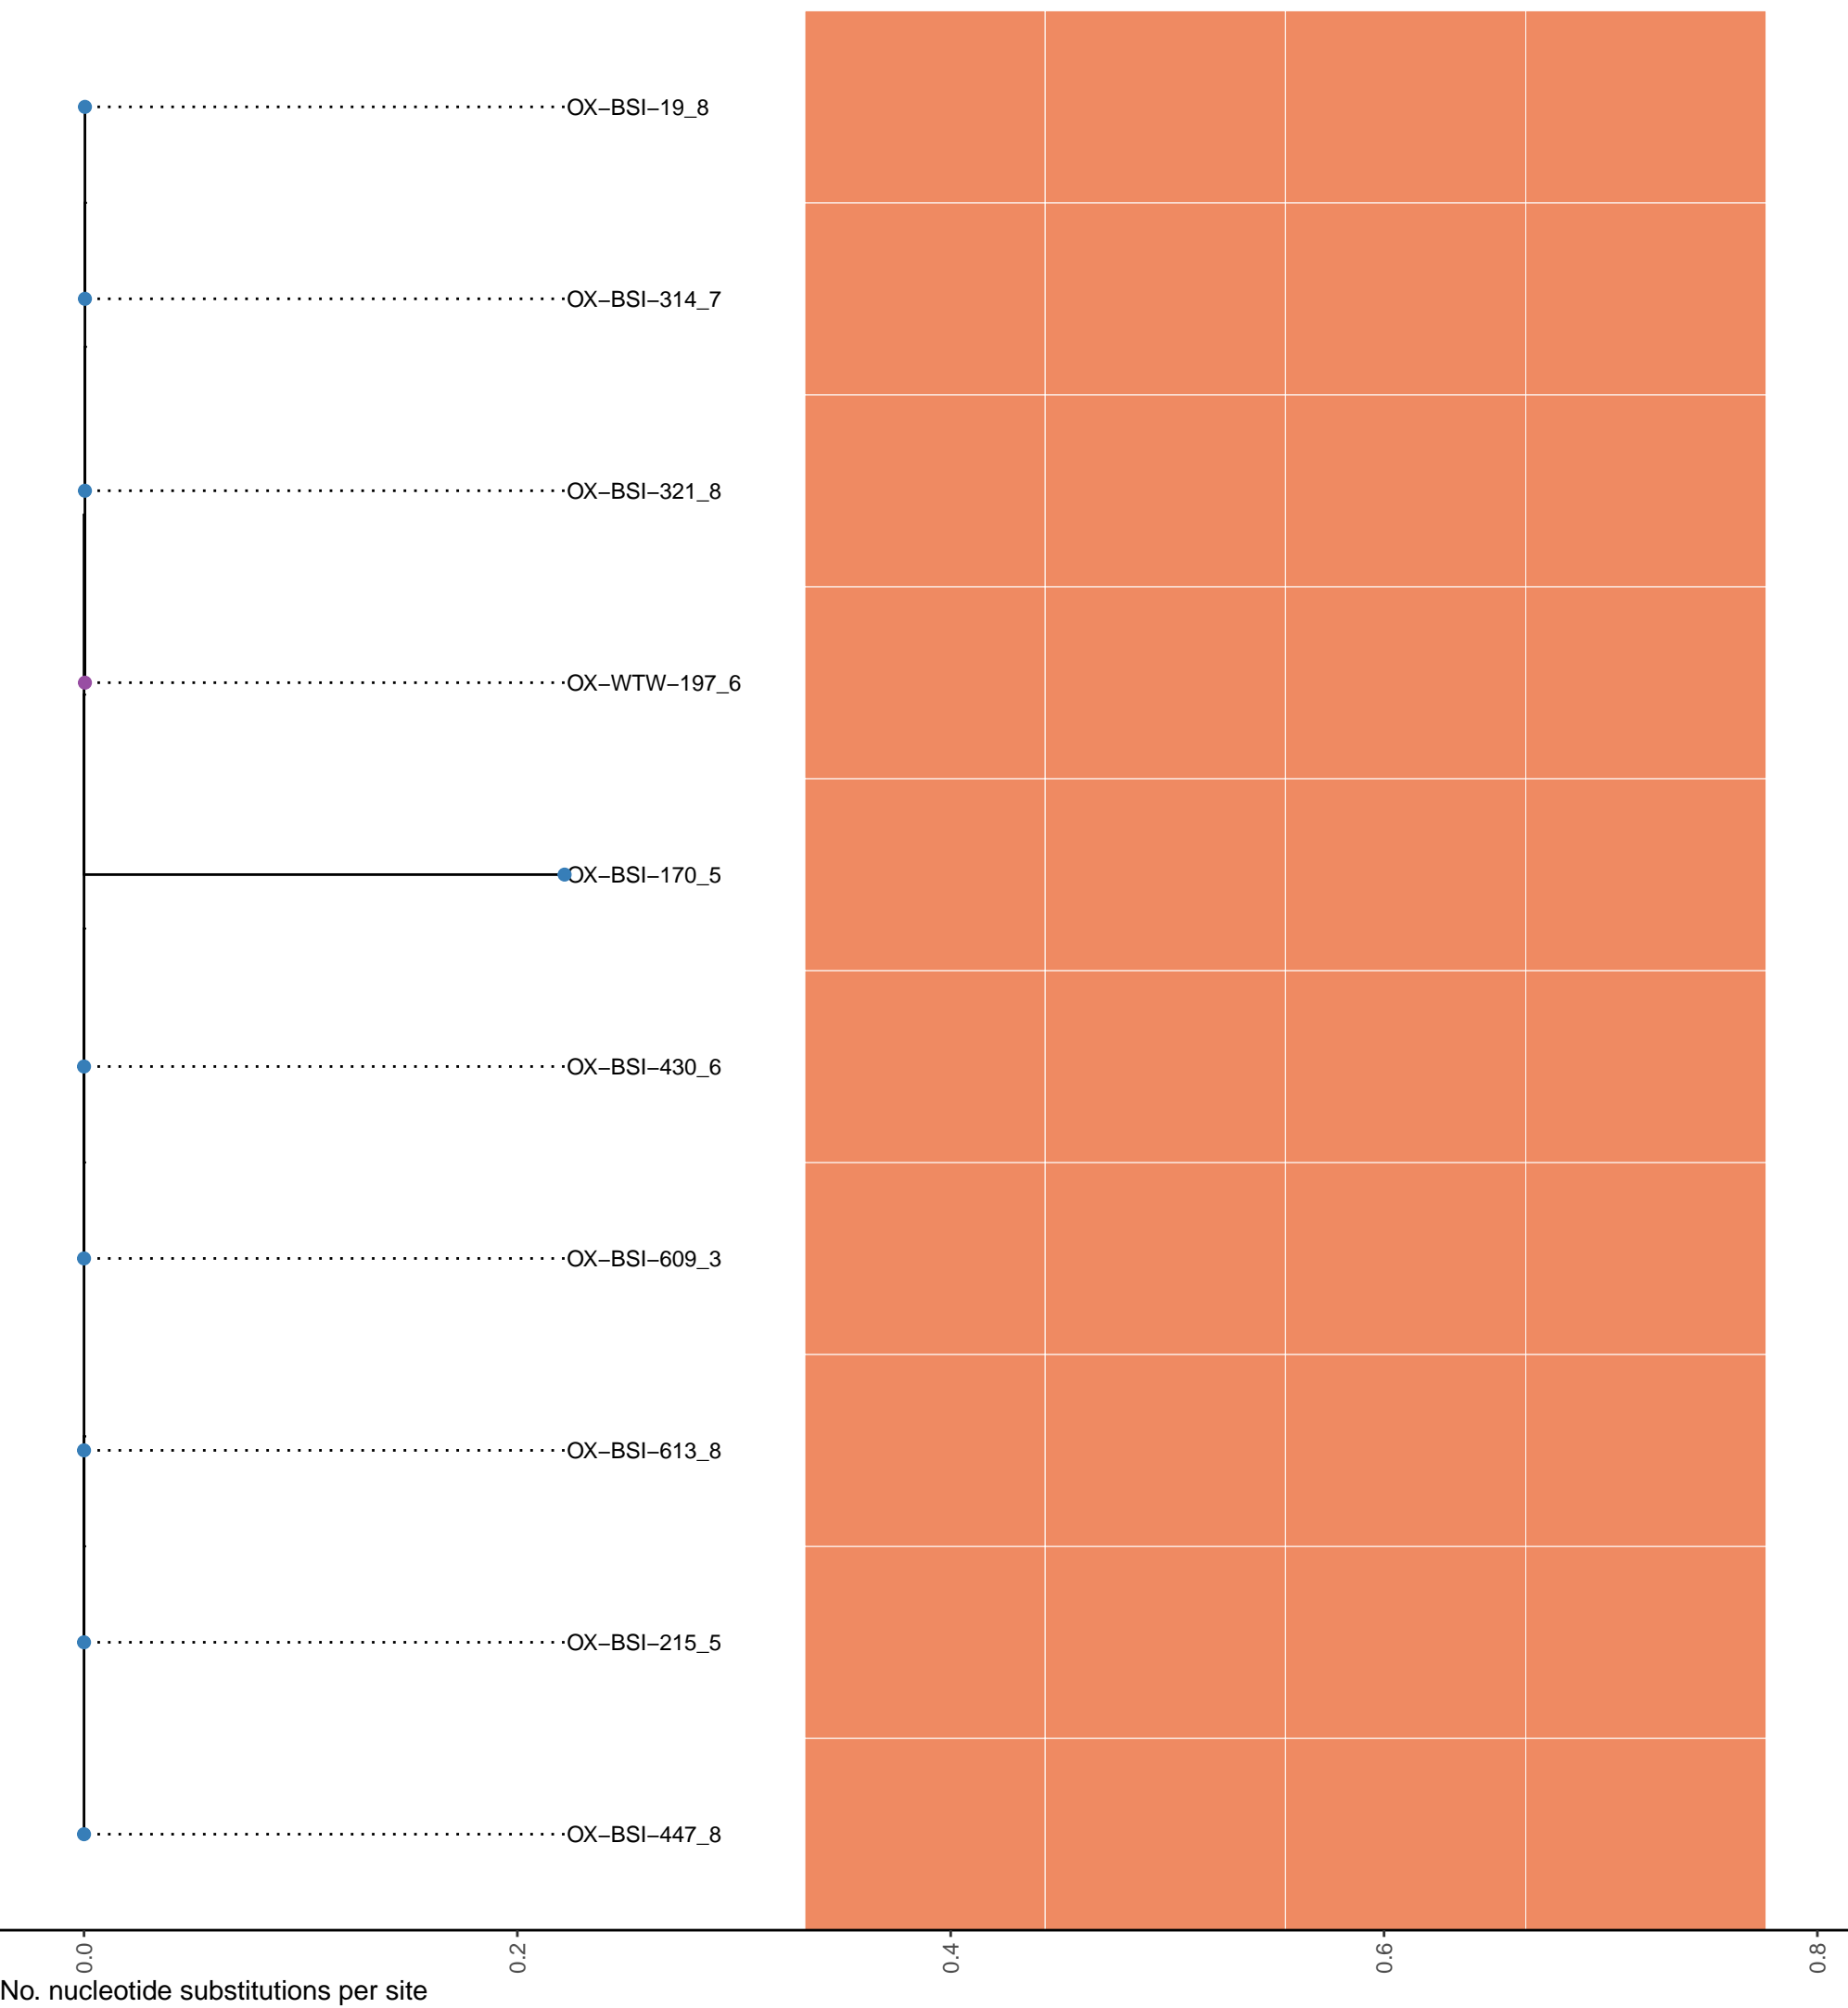

Gene type

- Absent
- Core
- Accessory
- Transposase

Compartment

- BSI
- Environmental
- Livestock
- WwTW

Cluster 63  
34 core genes  
70 accessory genes

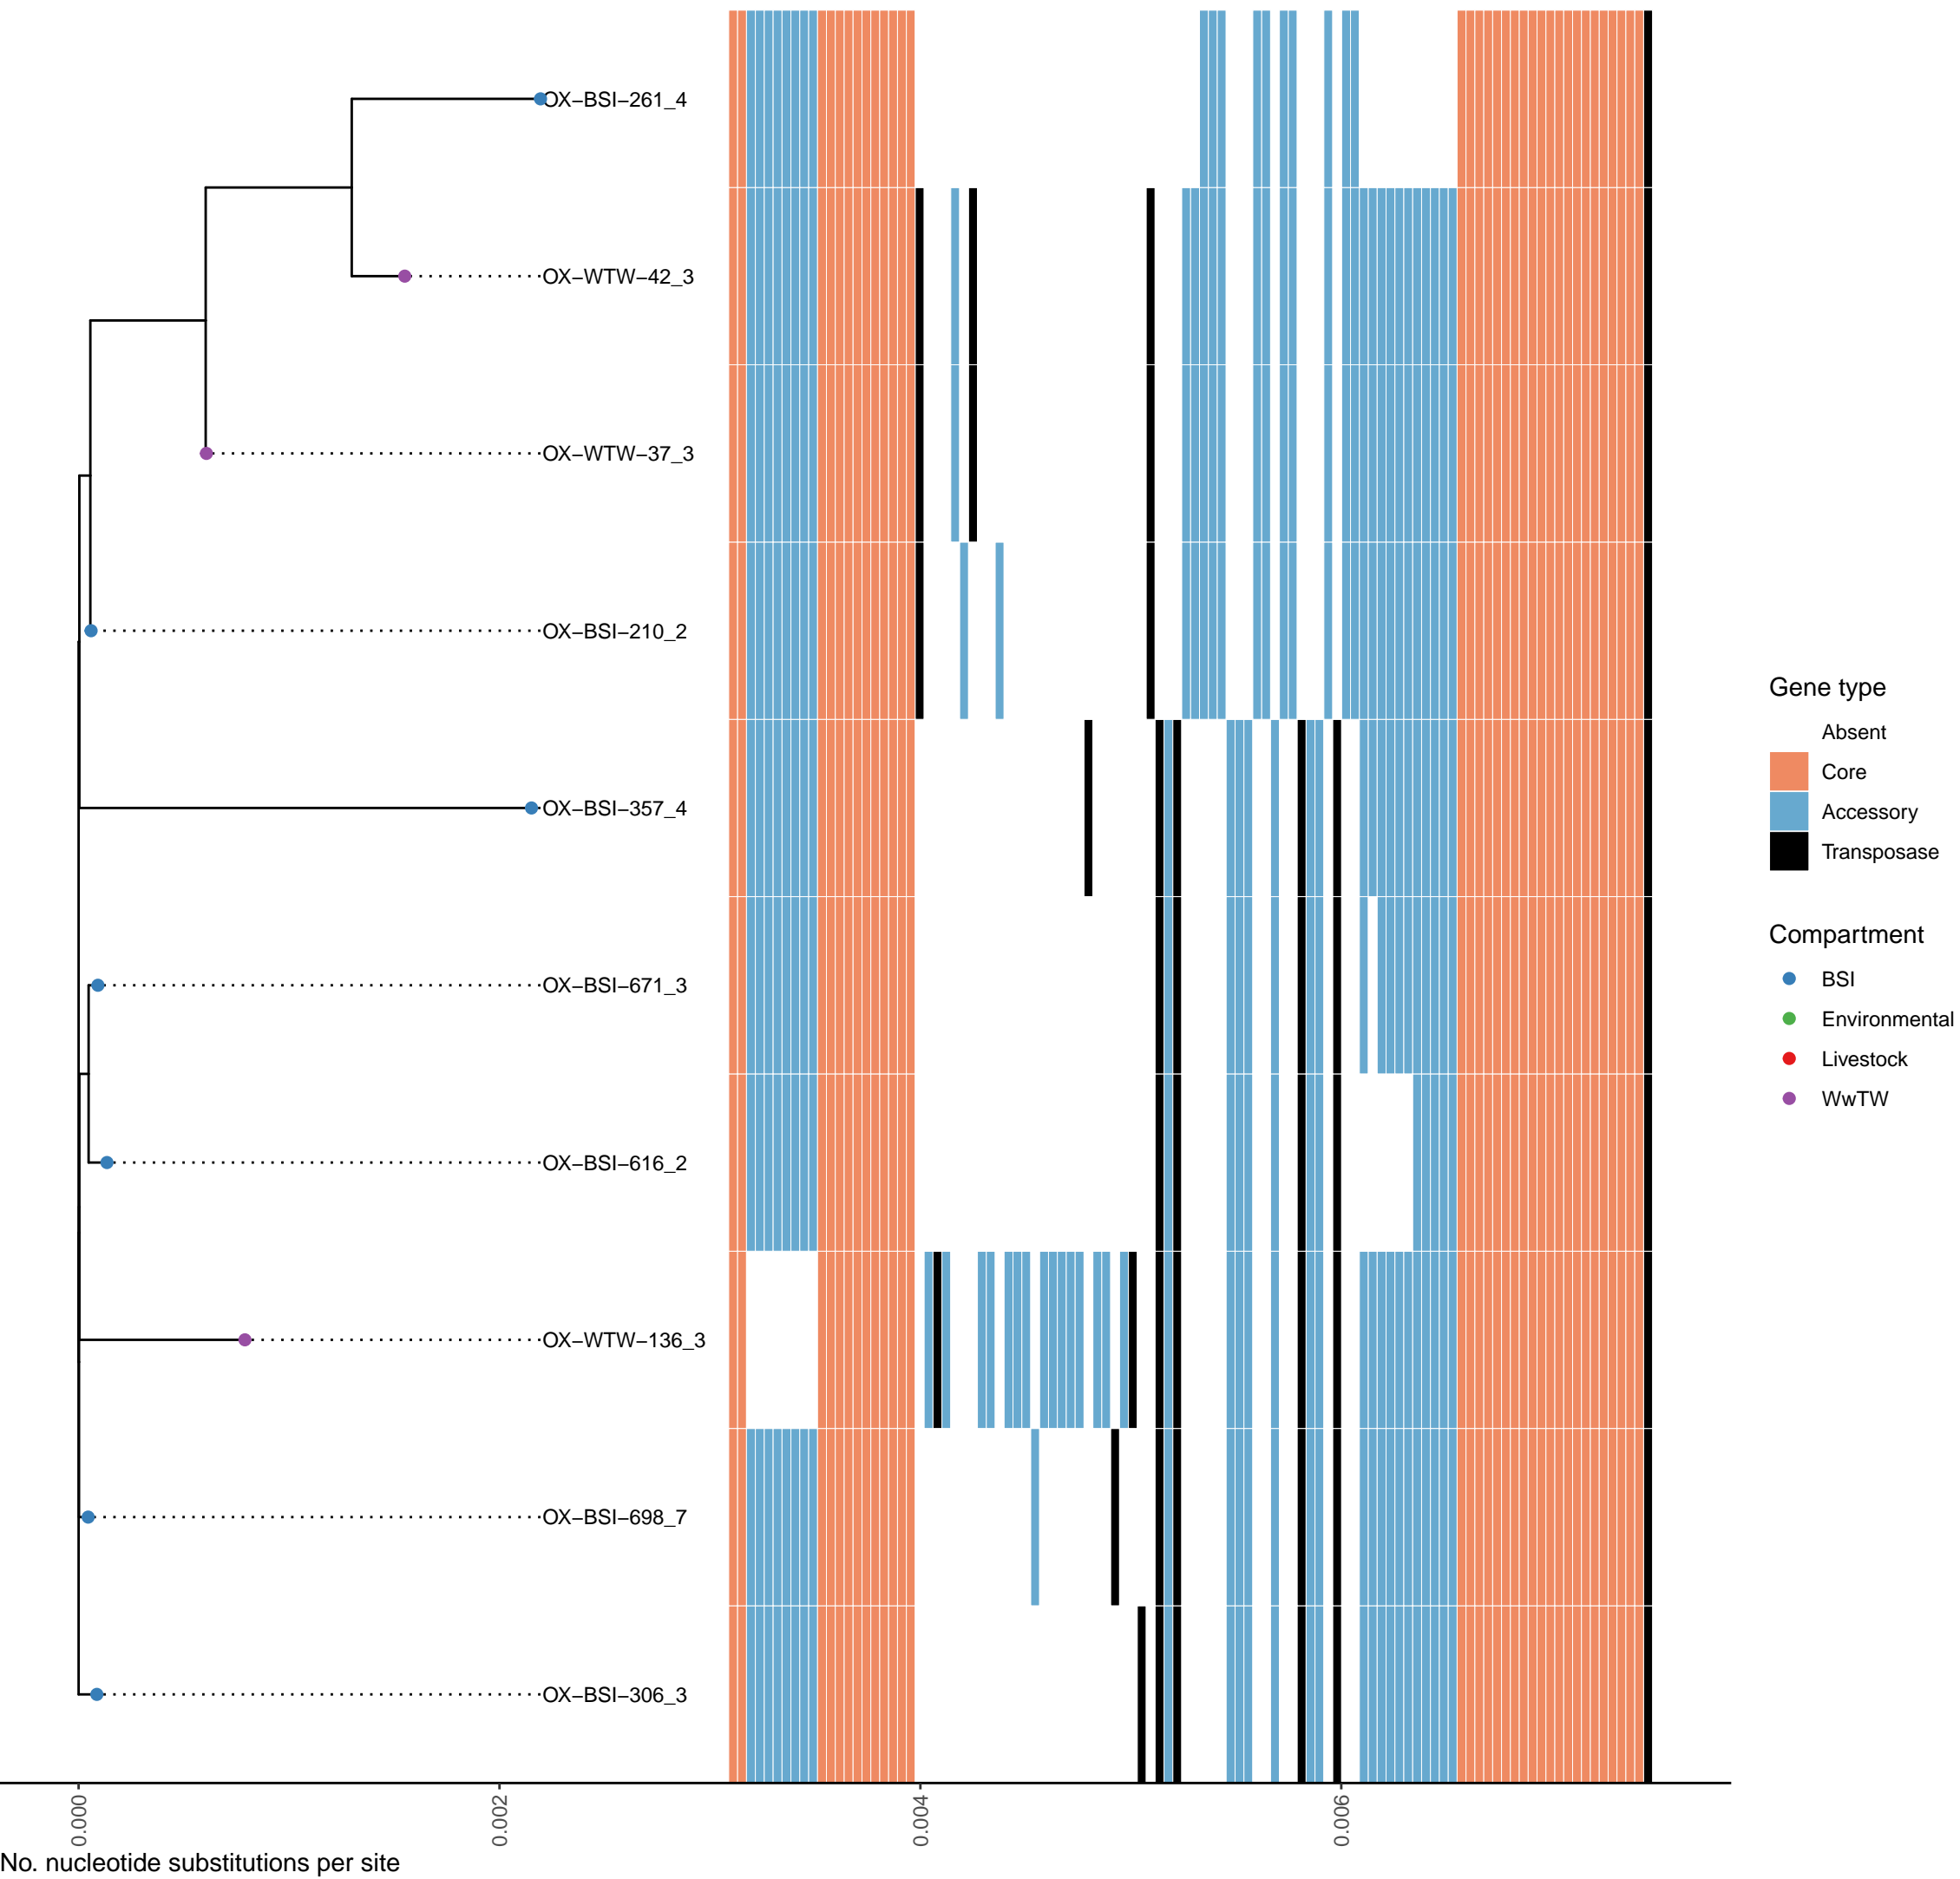

Cluster 64  
61 core genes  
150 accessory genes

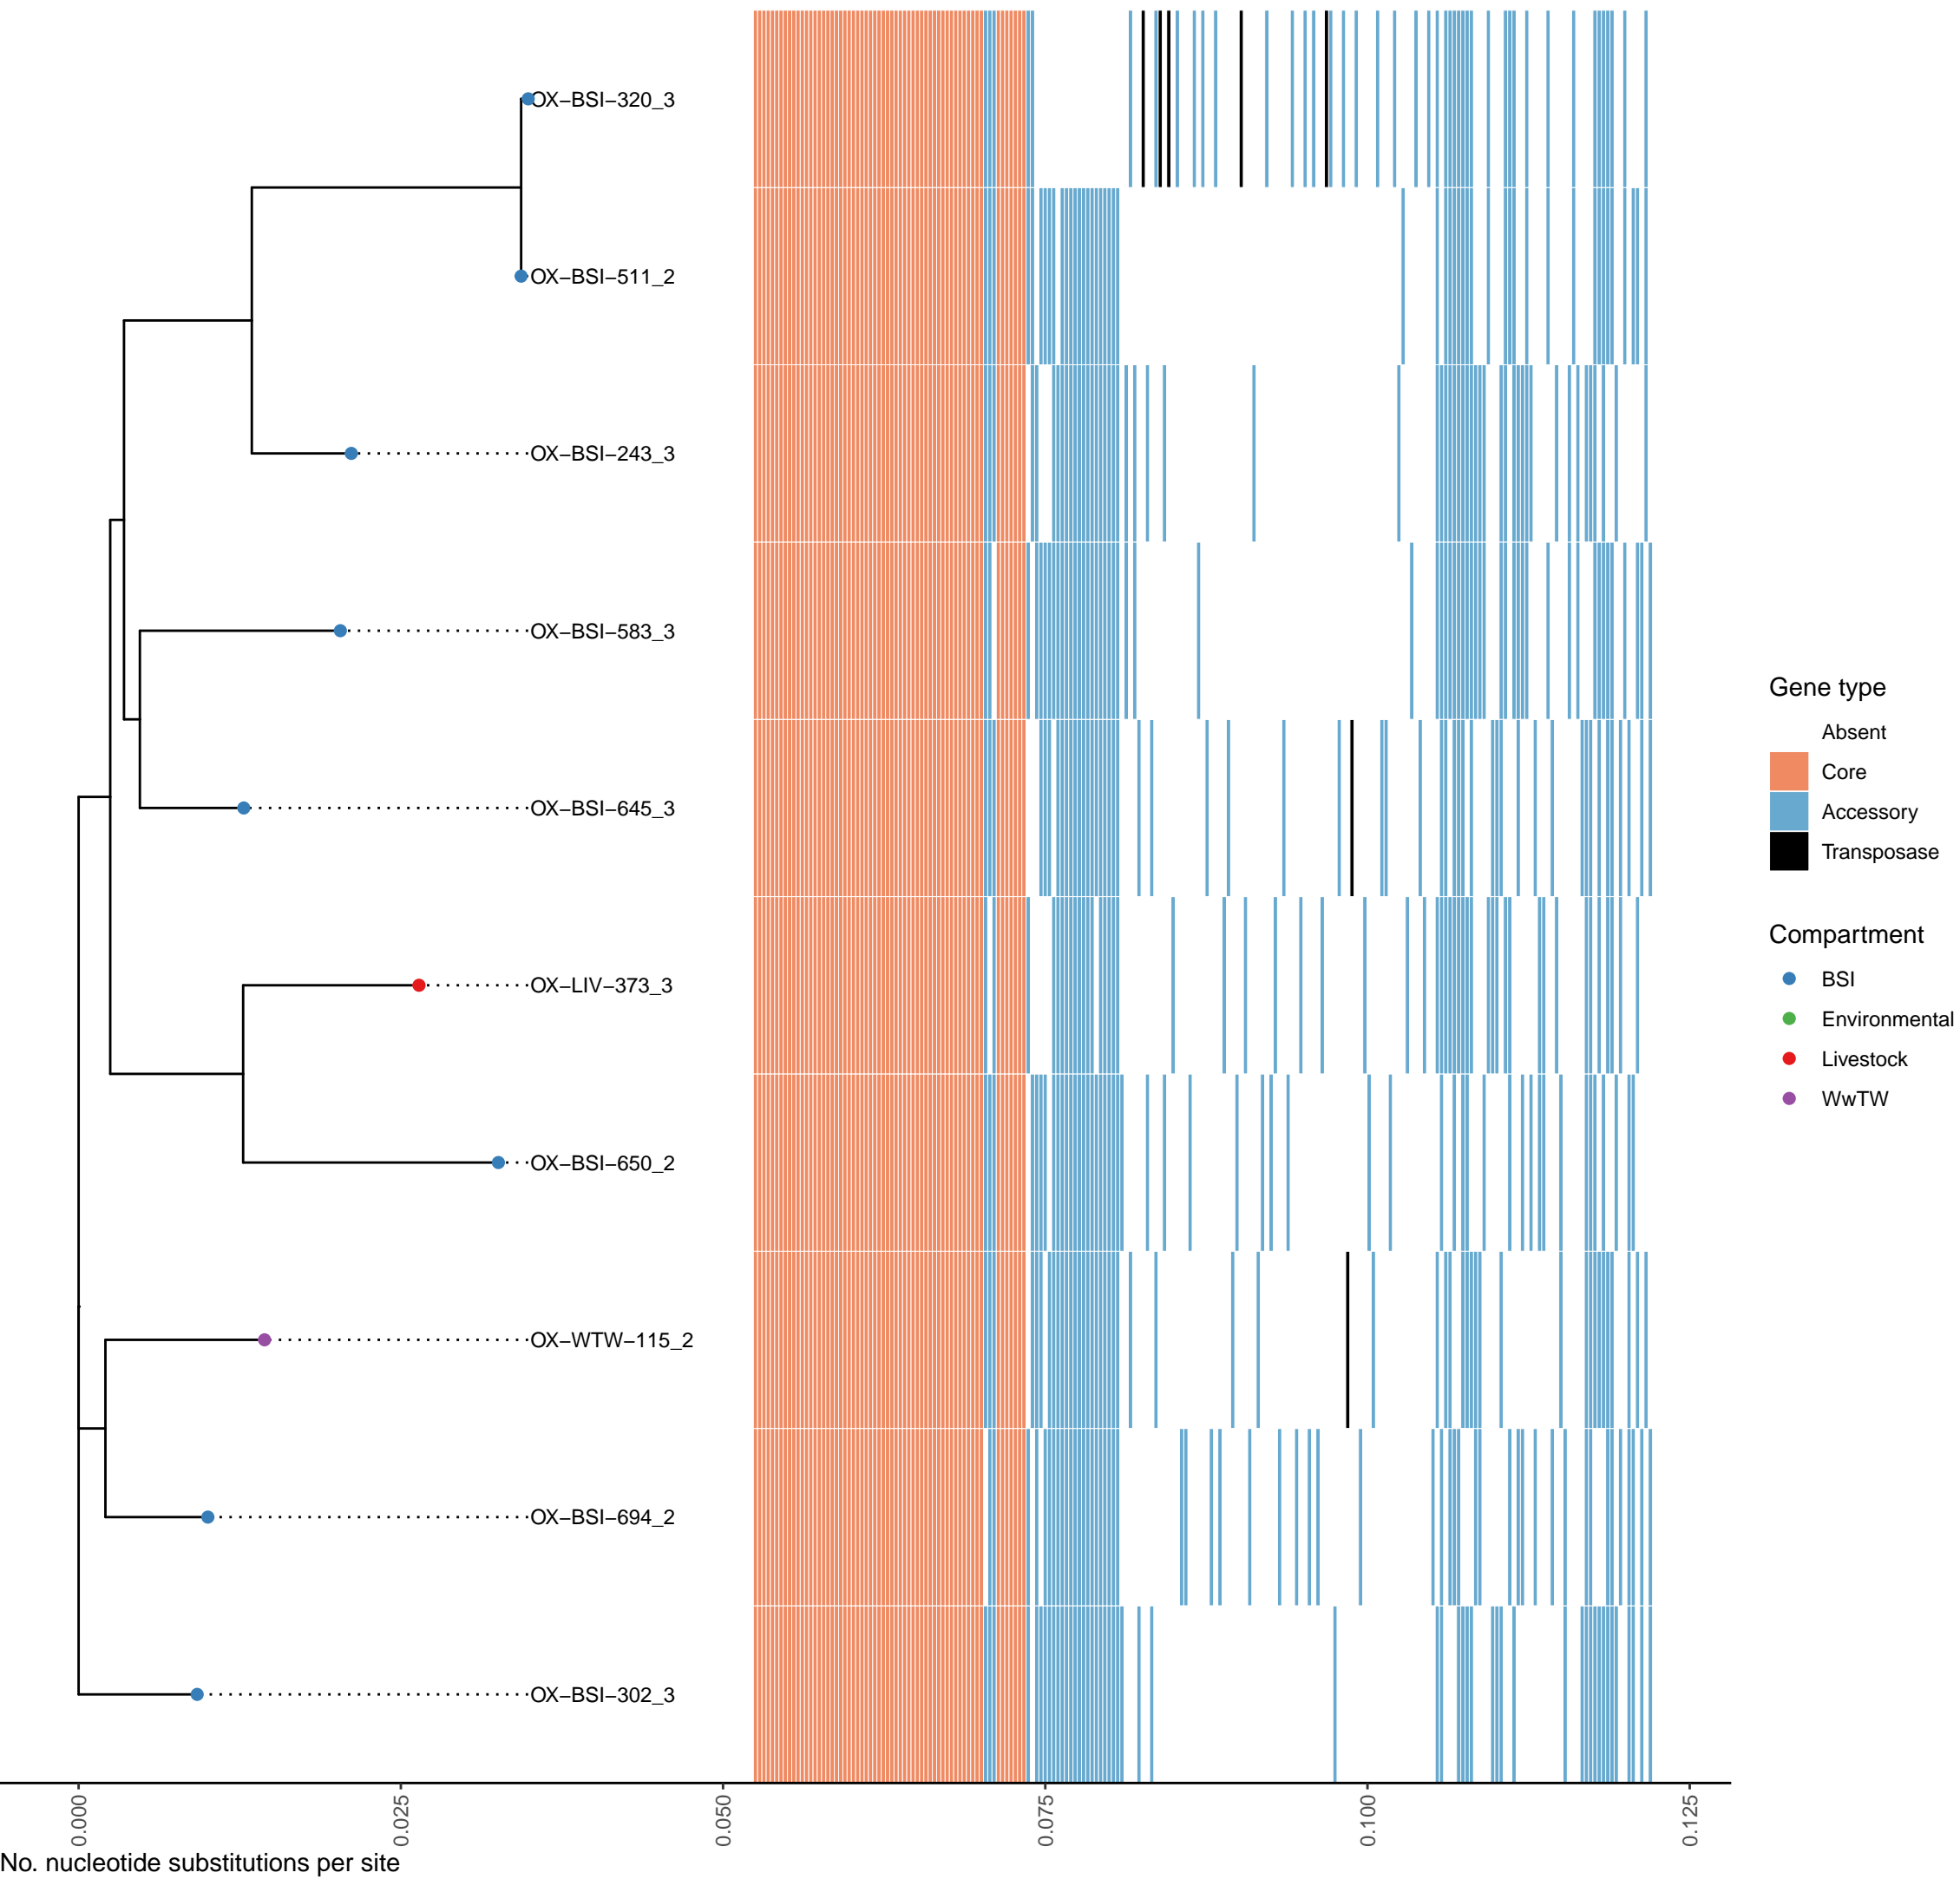

Cluster 66  
31 core genes  
14 accessory genes

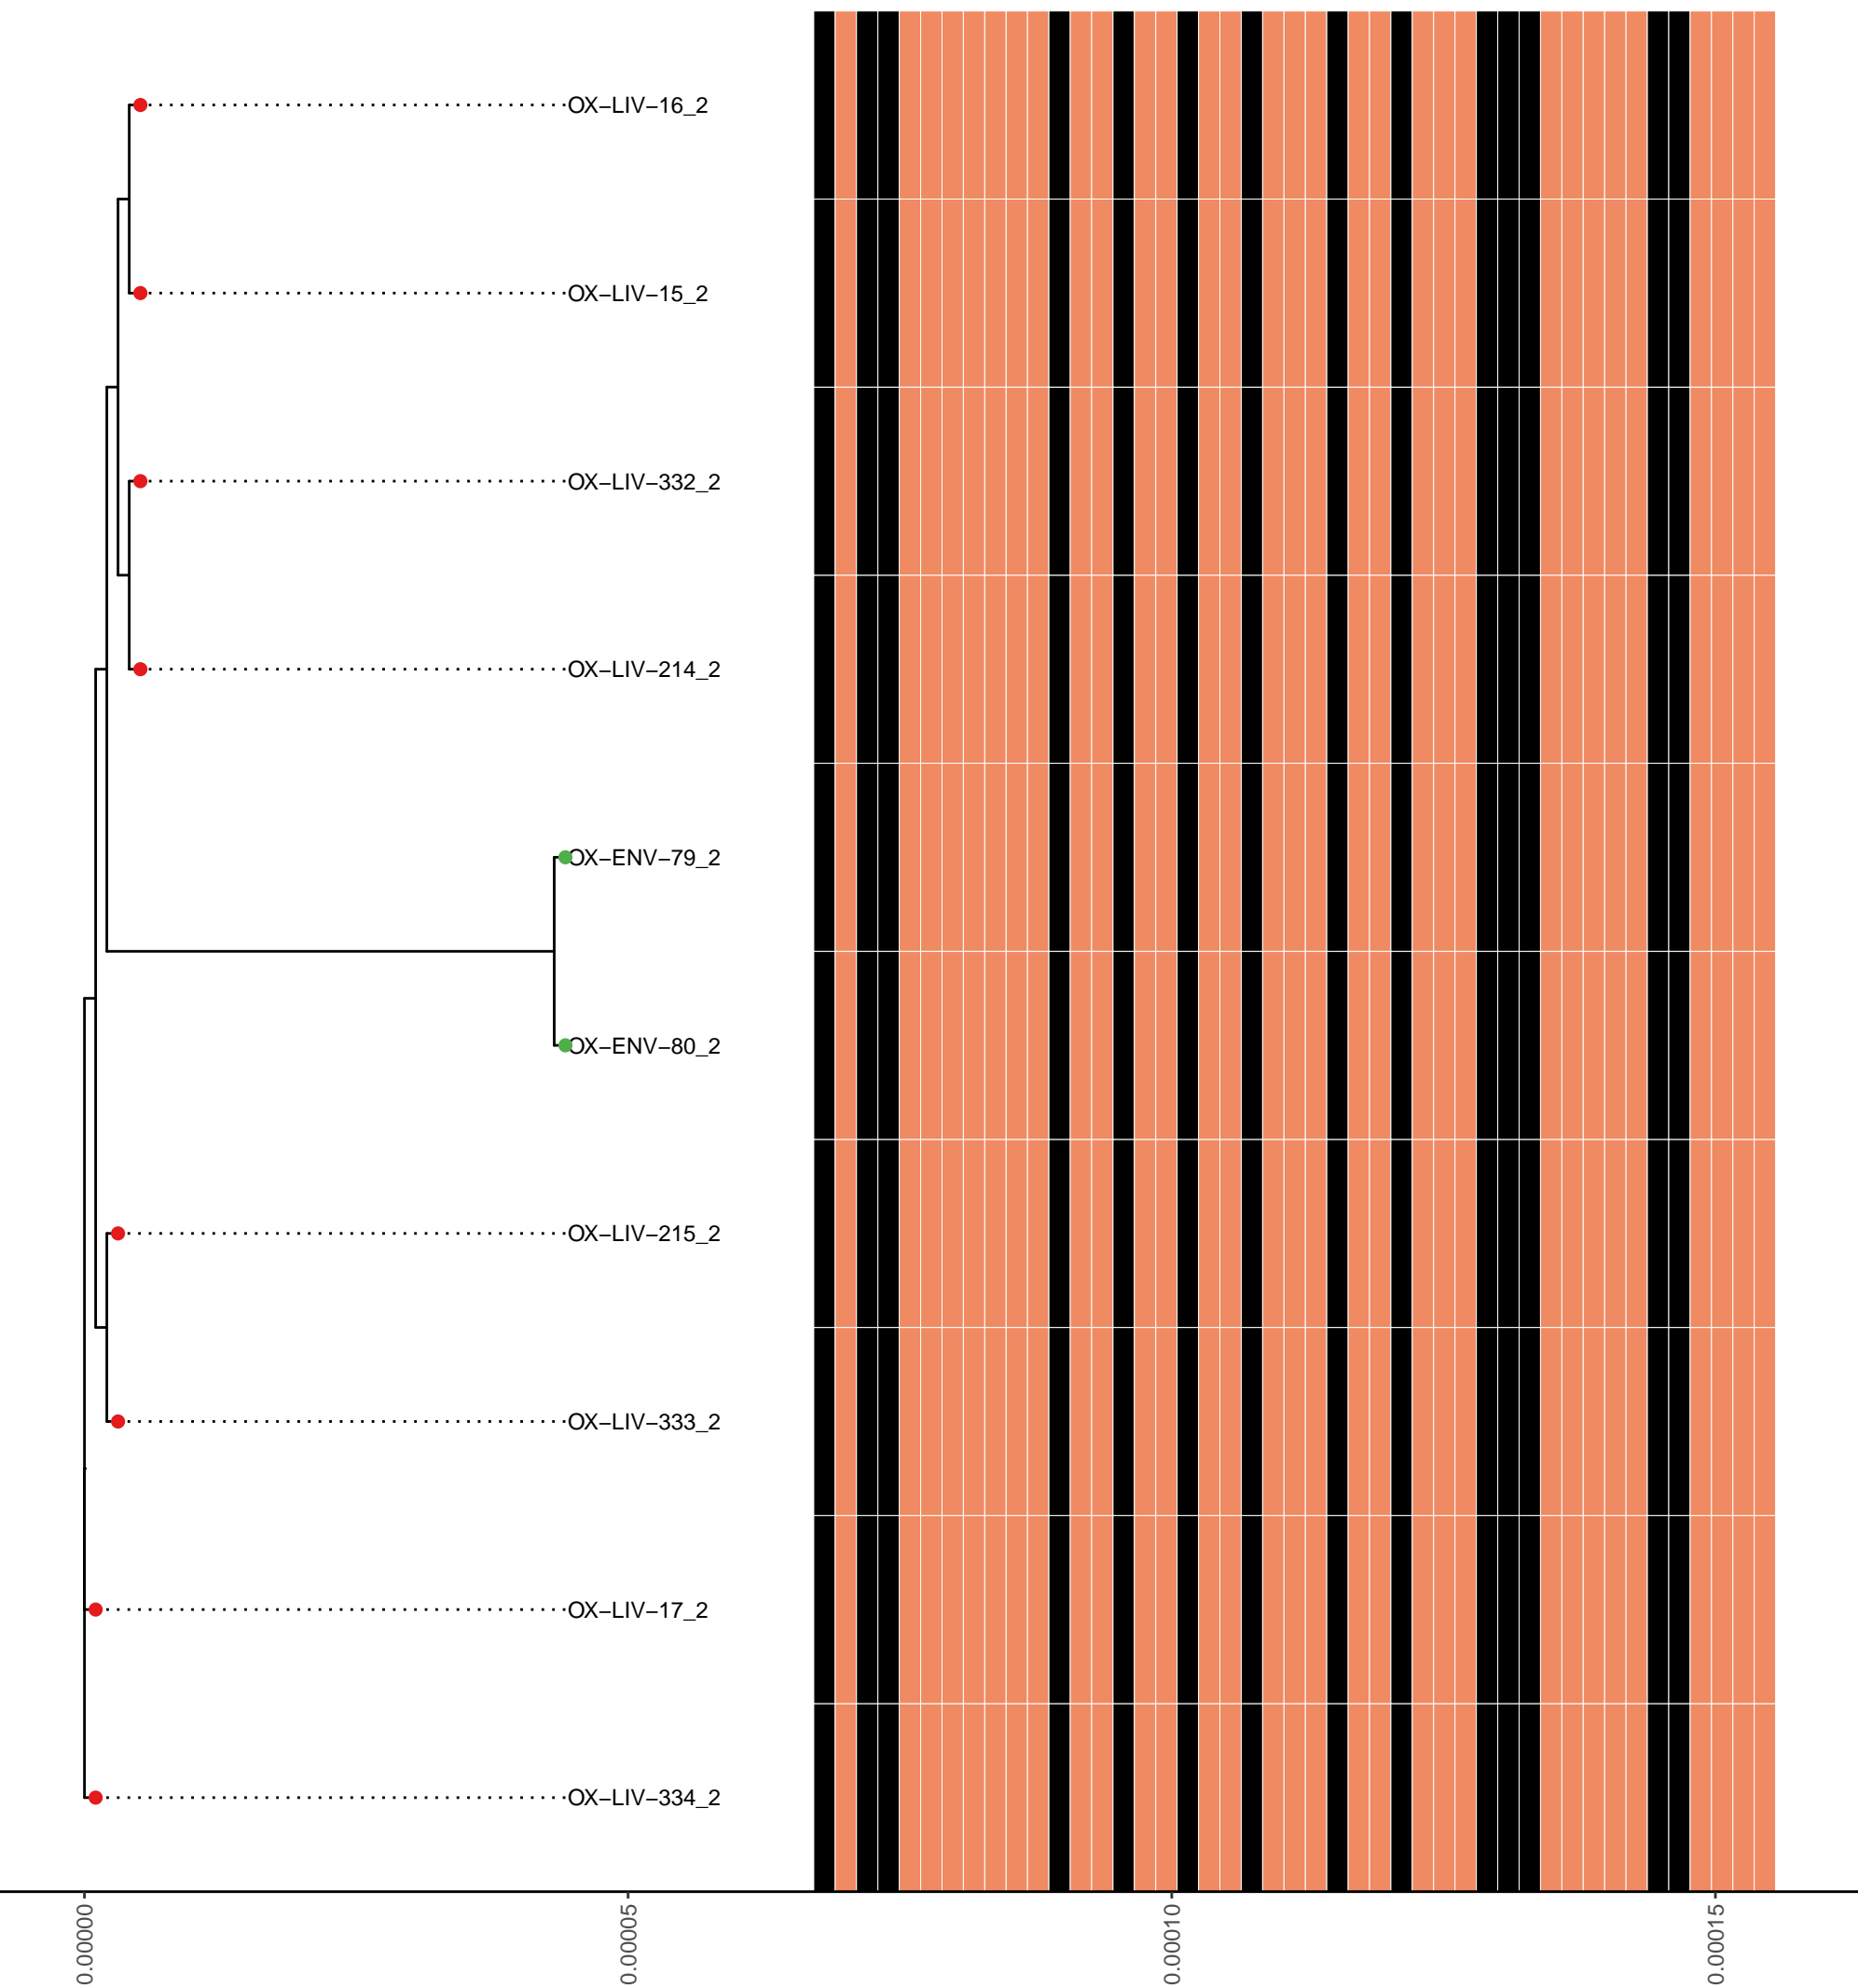

Gene type

- Absent
- Core
- Accessory
- Transposase

Compartment

- BSI
- Environmental
- Livestock
- WwTW

Cluster 67  
4 core genes  
5 accessory genes

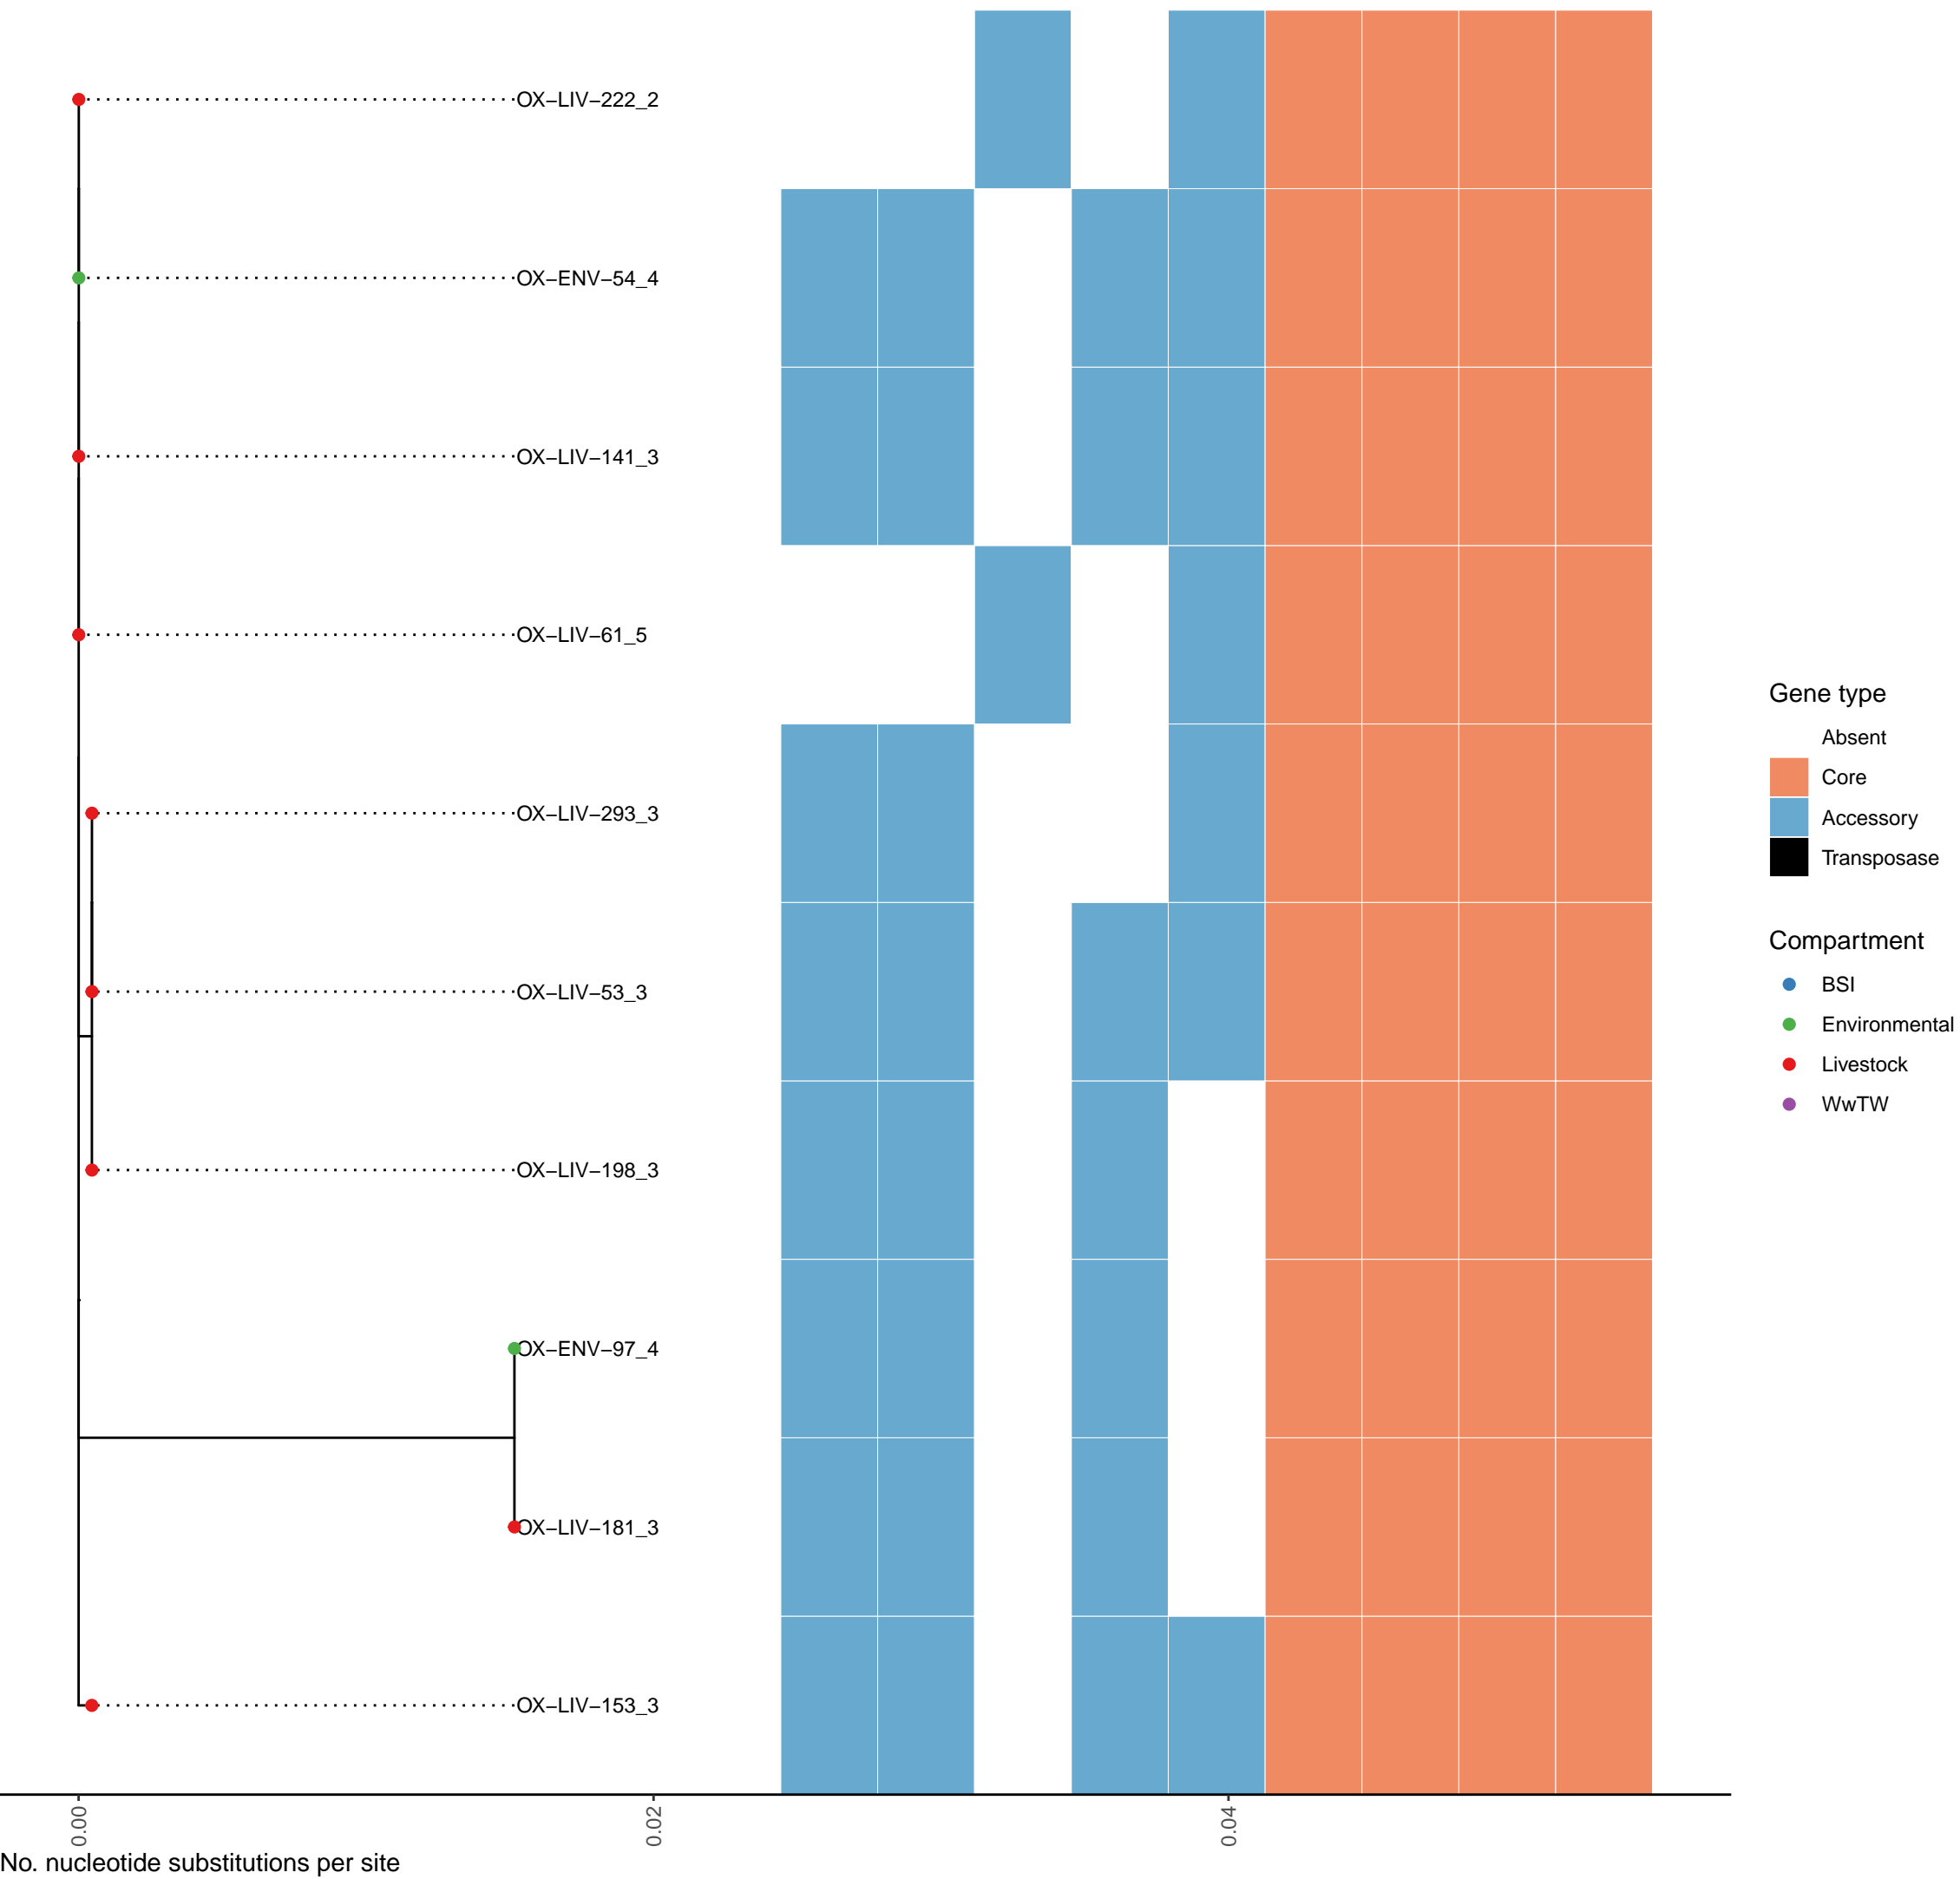

Cluster 68  
5 core genes  
2 accessory genes

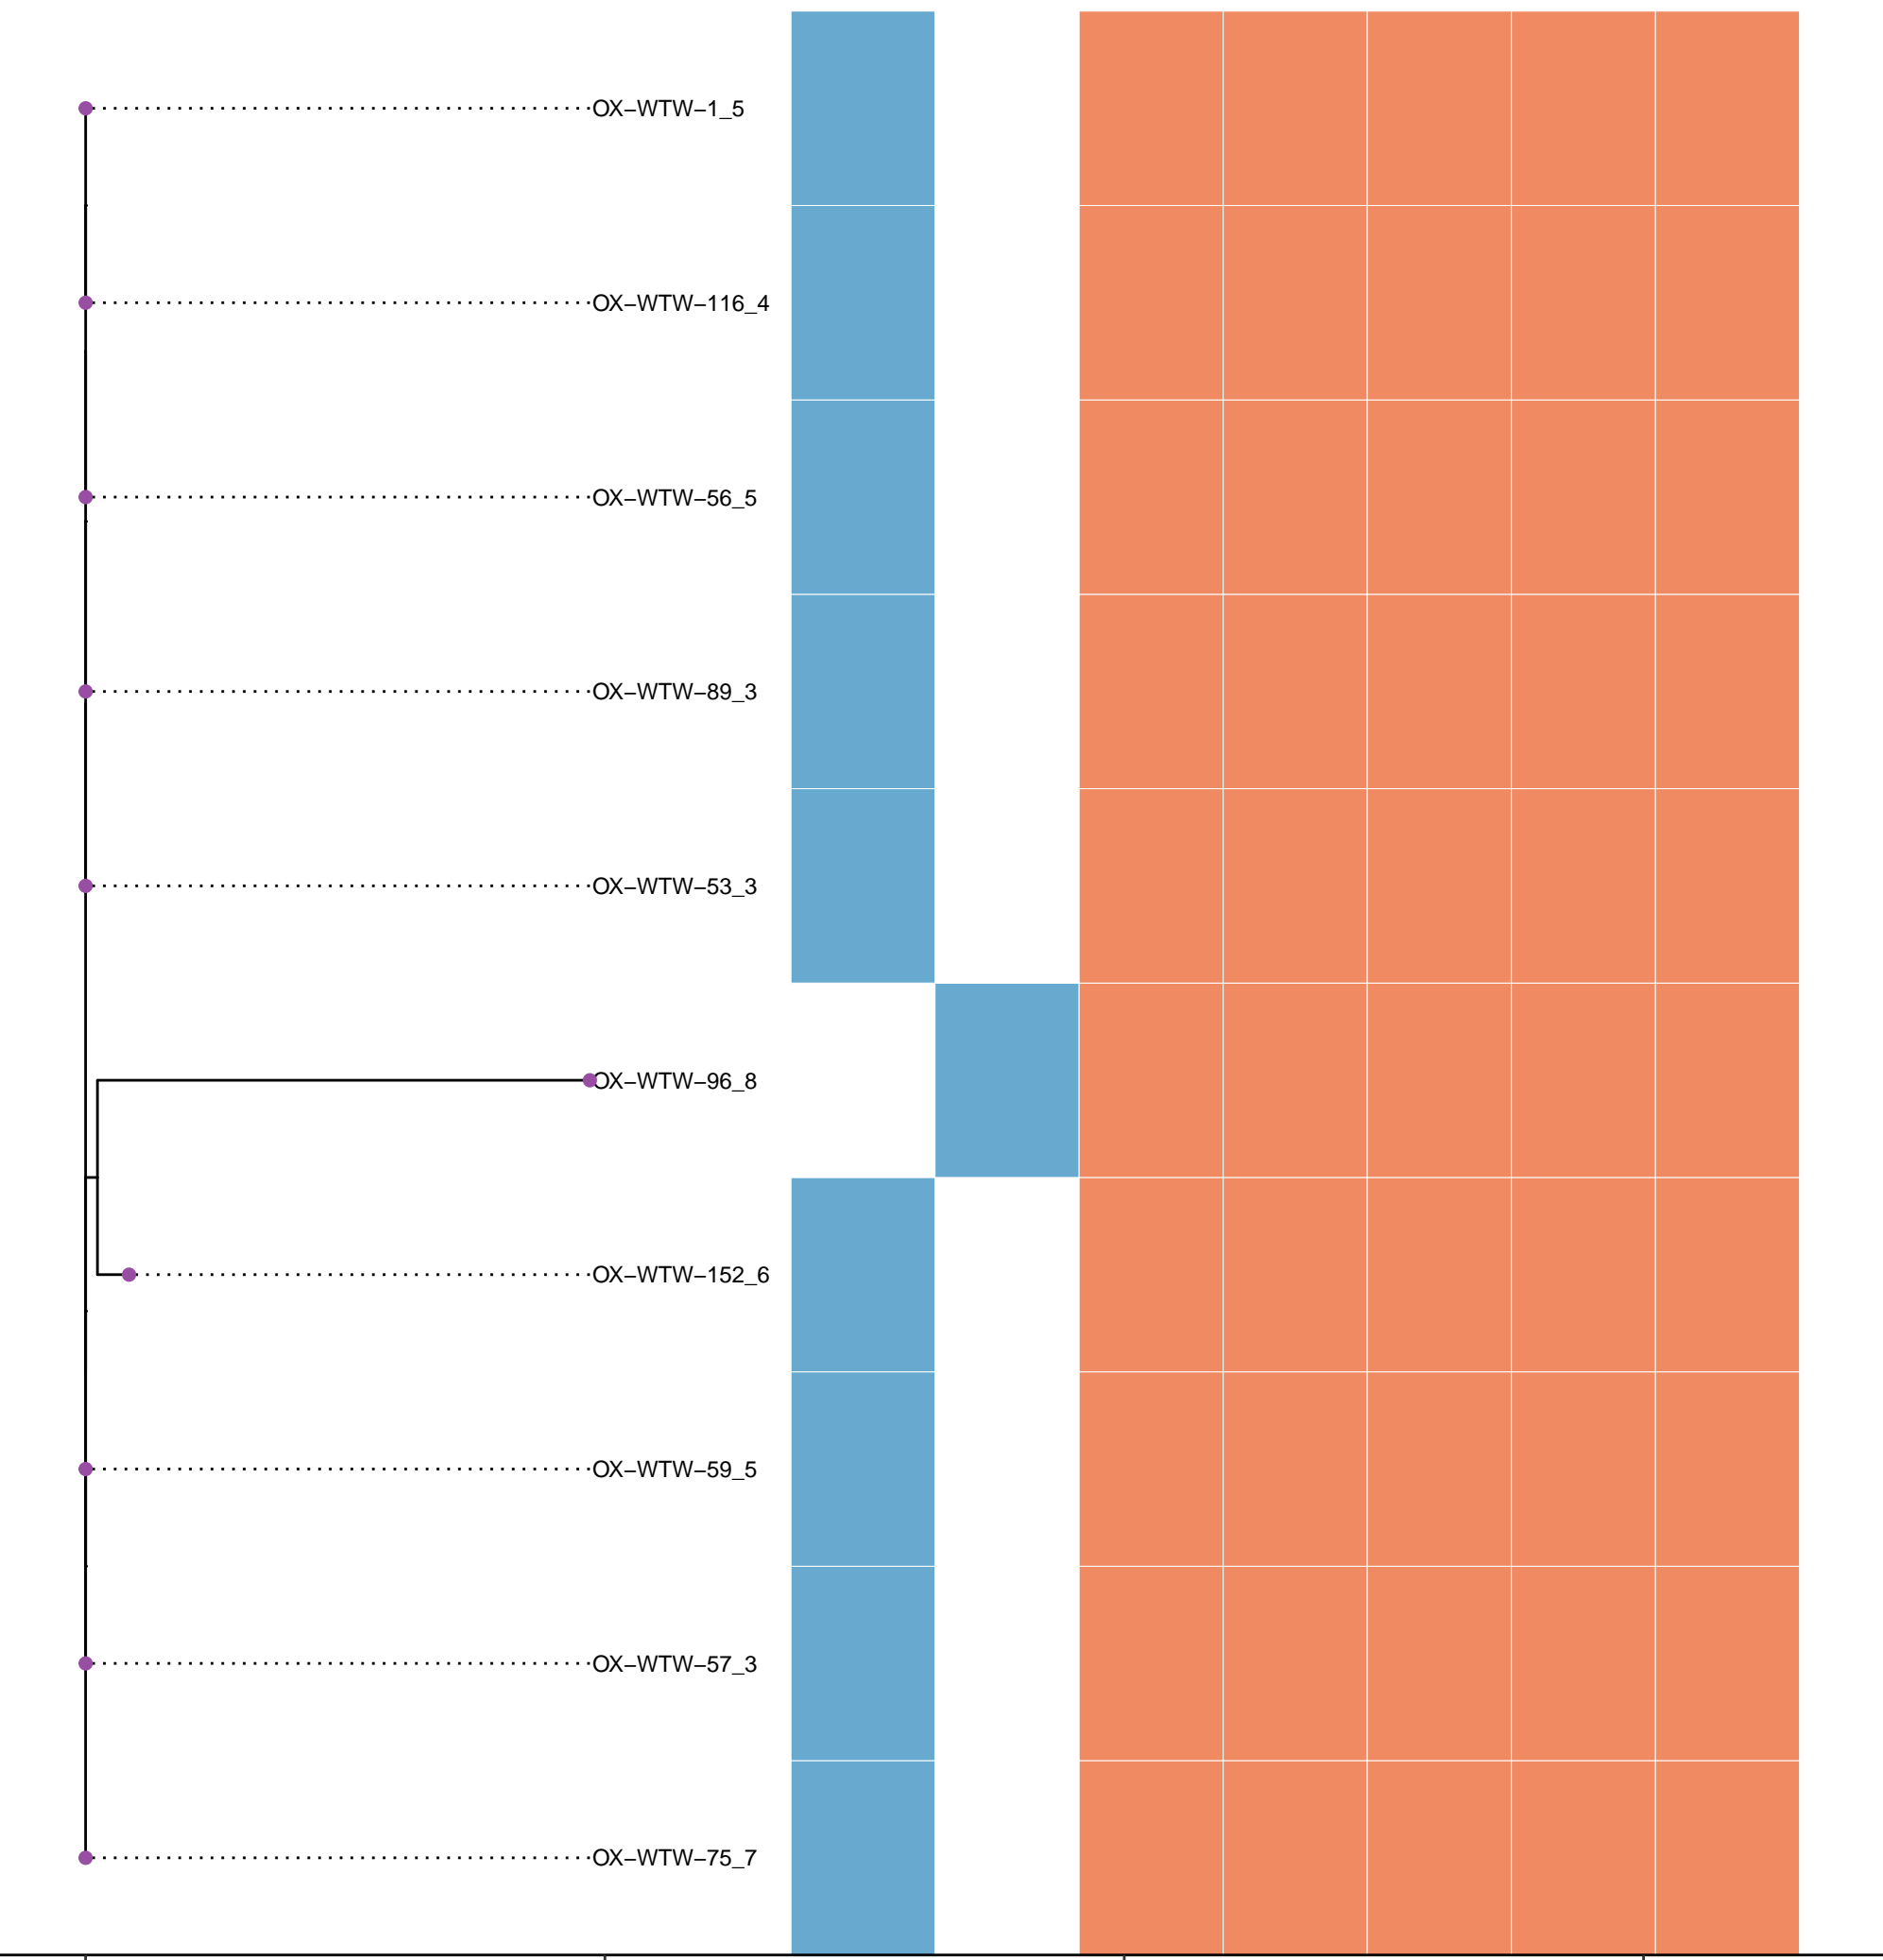

Gene type

- Absent
- Core
- Accessory
- Transposase

Compartment

- BSI
- Environmental
- Livestock
- WwTW

No. nucleotide substitutions per site

Cluster 69  
3 core genes  
3 accessory genes

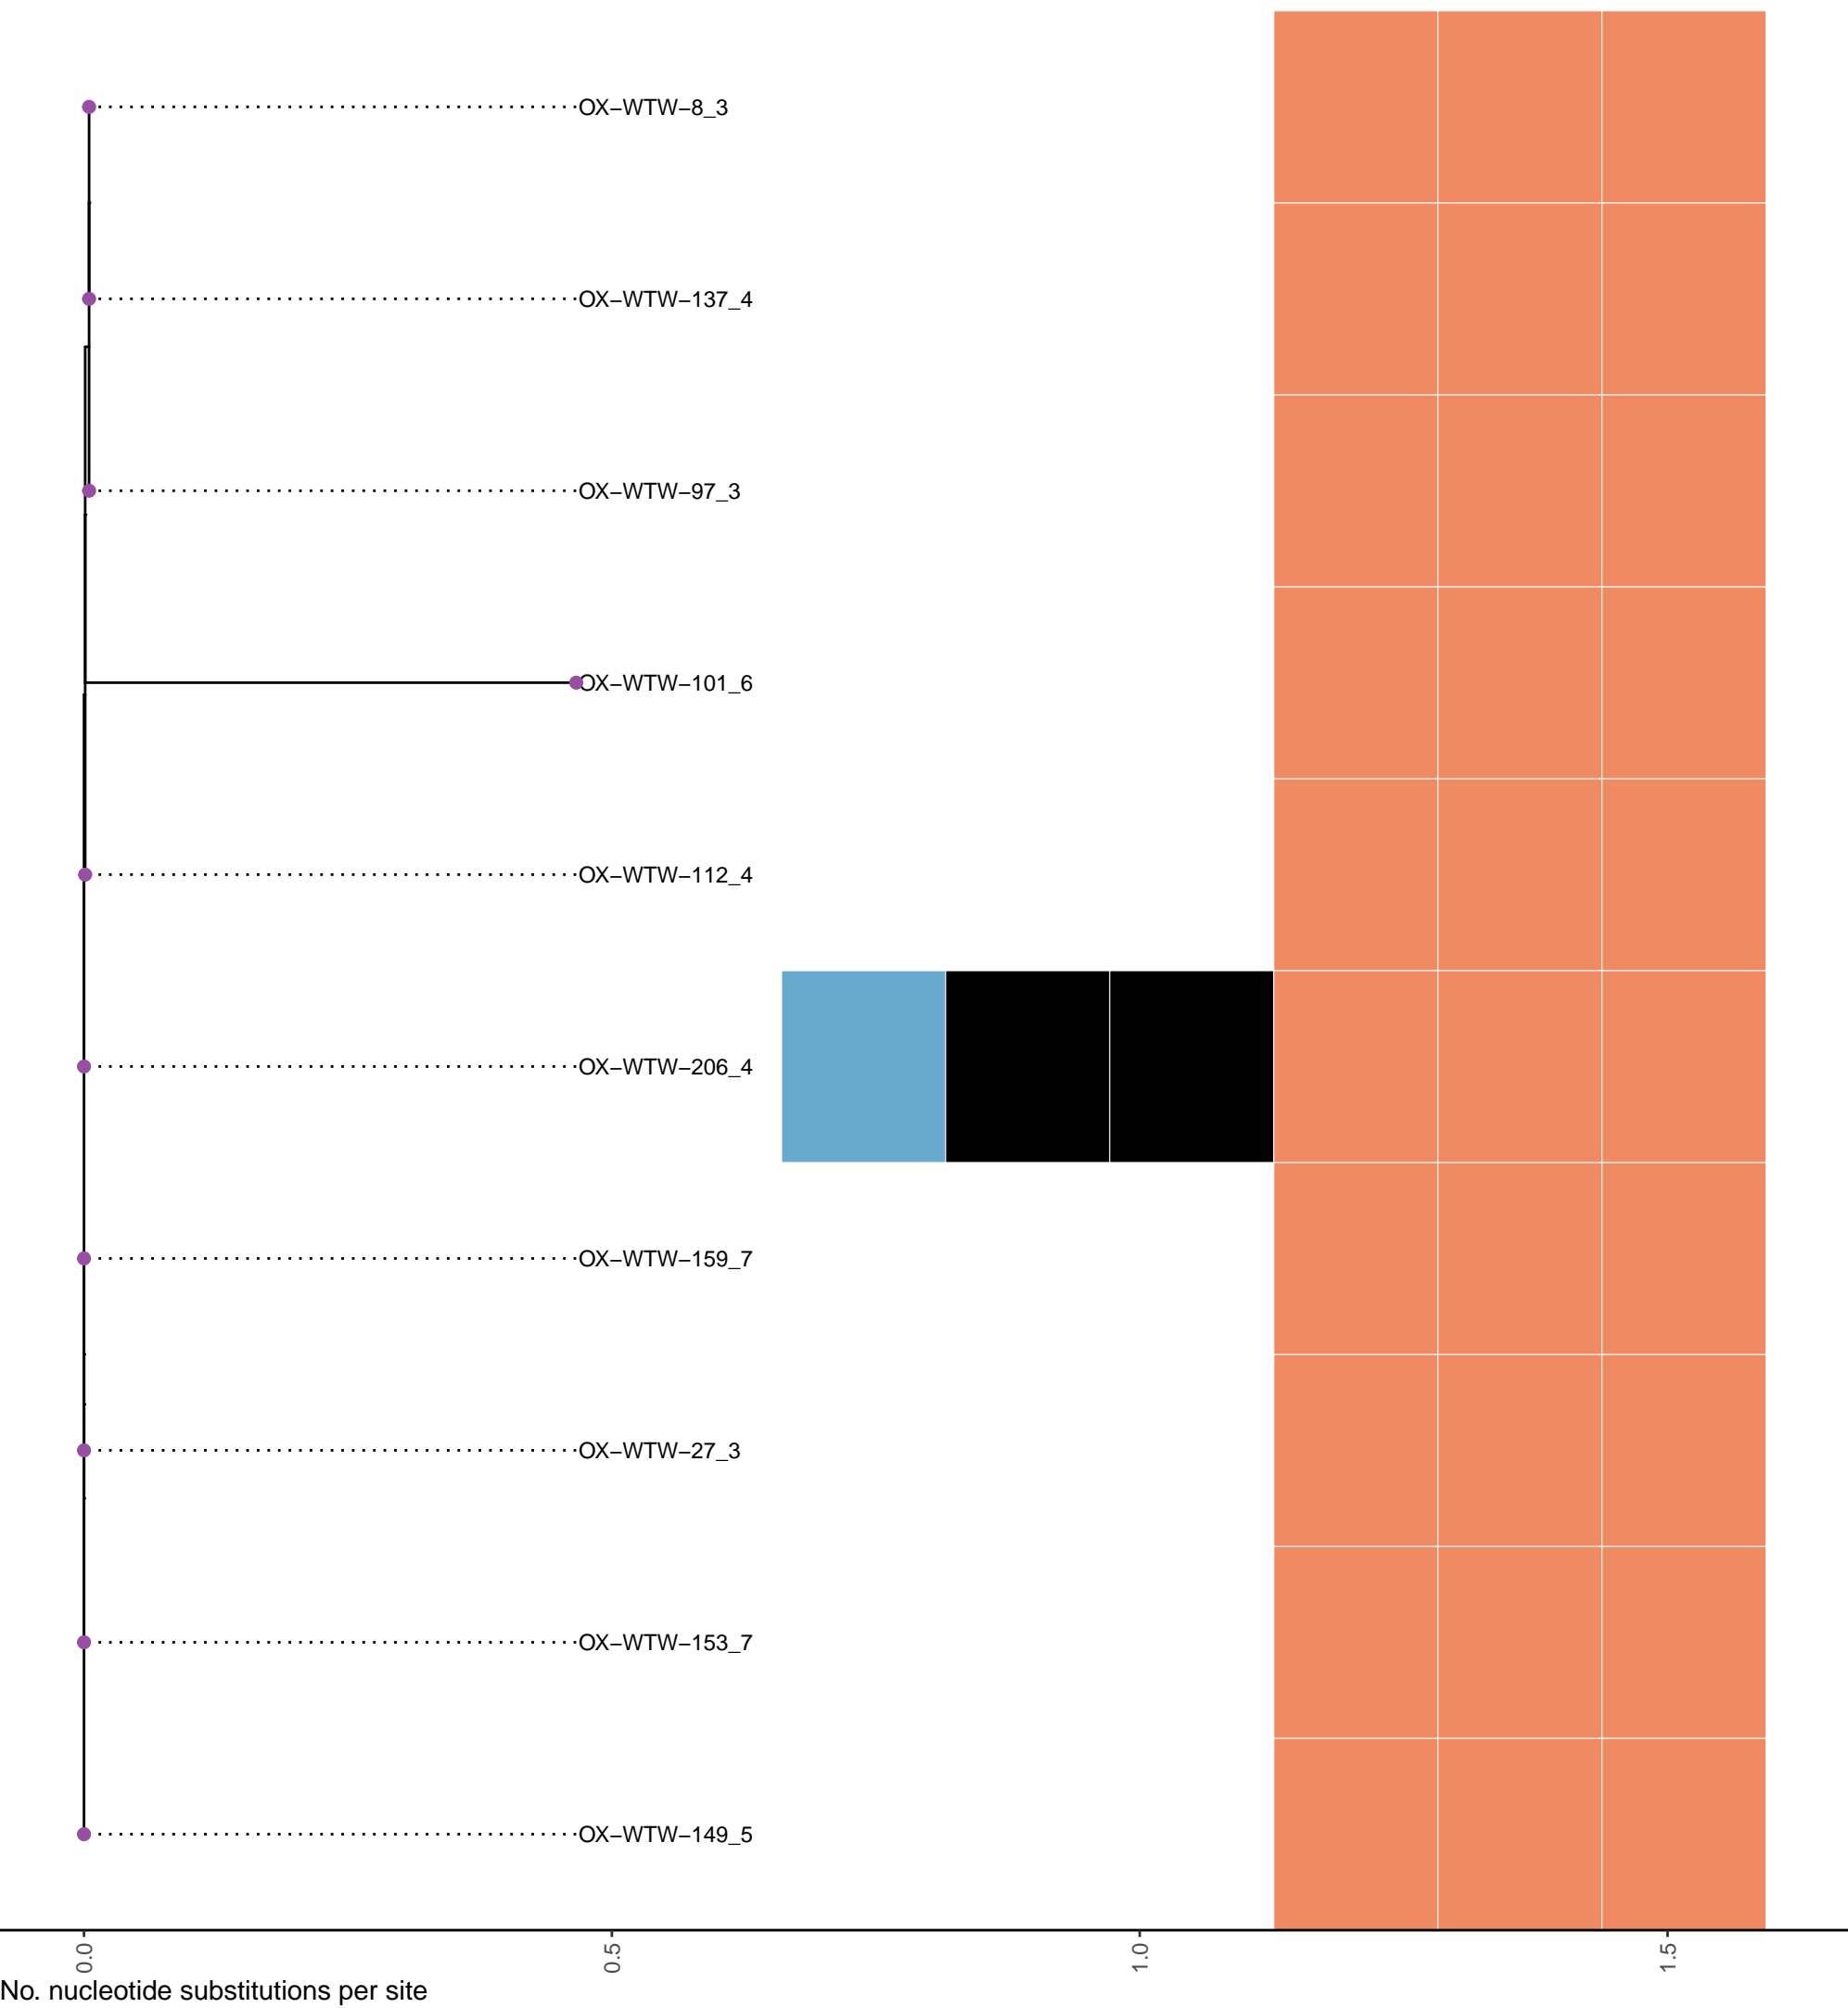

Supplement: supp [file elife-85302-supp-v1.zip › elife_poa_e85302_Supplementary_file_1.pdf]
