# Supplementary material for: Enterobacterales plasmid sharing amongst human bloodstream infections, livestock, wastewater, and waterway niches in Oxfordshire, UK
Source: eLife journal article supplement (doi:10.7554/elife.85302), 2023-03-24
Supplement: supp [file elife-85302-supp-v1.zip]

Archive with 14 entries (14 files):
- elife_poa_e85302_Appendix_1_figure_1.pdf
- elife_poa_e85302_Appendix_1_figure_2.pdf
- elife_poa_e85302_Appendix_1_figure_3.pdf
- elife_poa_e85302_Appendix_1_figure_4.pdf
- elife_poa_e85302_Appendix_1_figure_5.pdf
- elife_poa_e85302_Appendix_1_figure_6.pdf
- elife_poa_e85302_Appendix_1_figure_7.pdf
- elife_poa_e85302_Appendix_1_figure_8.pdf
- elife_poa_e85302_Appendix_1_figure_9.pdf
- elife_poa_e85302_Supplementary_file_1.pdf
- elife_poa_e85302_Supplementary_file_2.csv
- elife_poa_e85302_Supplementary_file_3.csv
- elife_poa_e85302_Supplementary_file_4.csv
- elife_poa_e85302_Supplementary_file_5.csv
