# Supplementary material for: Enterobacterales plasmid sharing amongst human bloodstream infections, livestock, wastewater, and waterway niches in Oxfordshire, UK
Source: eLife journal article supplement (doi:10.7554/elife.85302), 2023-03-24

Number of near-identical incidences with BSI plasmids

20

10

0

0

100

200

300

400

500

Sample size of environmental/livestock isolates

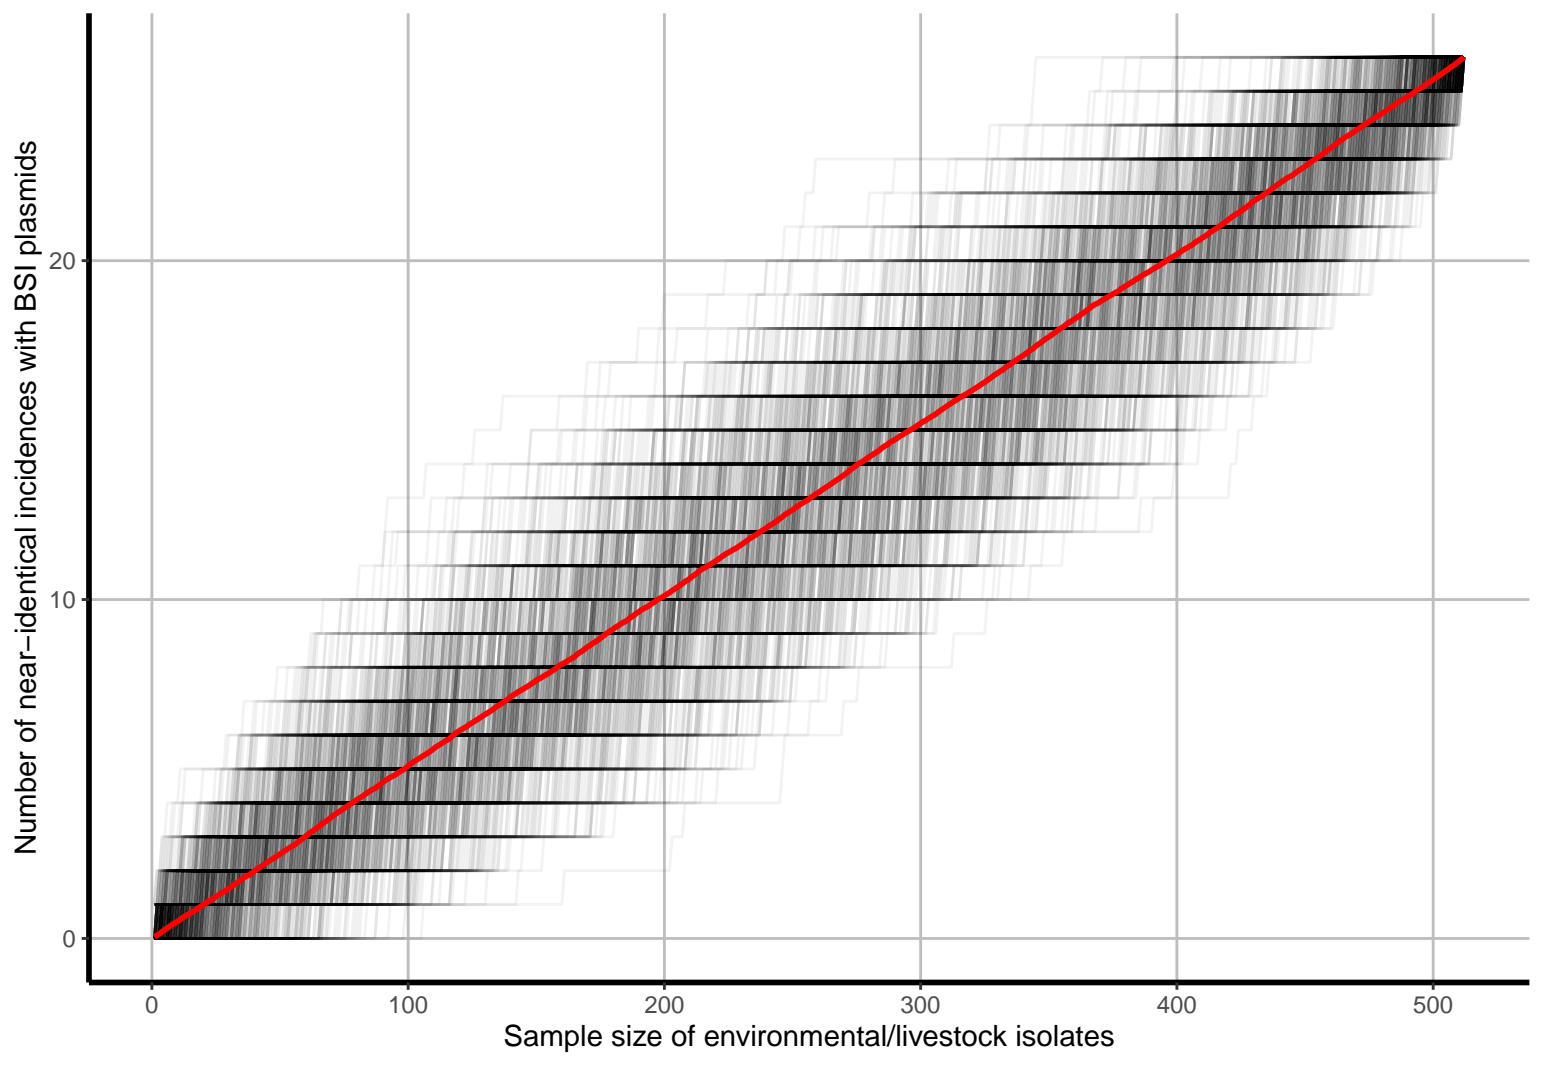

Supplement: supp [file elife-85302-supp-v1.zip › elife_poa_e85302_Appendix_1_figure_9.pdf]
