# Supplementary material for: Enterobacterales plasmid sharing amongst human bloodstream infections, livestock, wastewater, and waterway niches in Oxfordshire, UK
Source: eLife journal article supplement (doi:10.7554/elife.85302), 2023-03-24
Supplement: supp [file elife-85302-supp-v1.zip › elife_poa_e85302_Supplementary_file_3.csv]

ID	Isolate	Contig	Type	Niche	Length-(bp)	GC-(%)	mlst-PubMLST	mlst-ST	Identical-group-name	Identical-group-size	Cluster-name	Cluster-size	AMRFinderPlus	Abricate-ISfinder	Abricate-PlasmidFinder	Abricate-BacMet	MOB-typer-relaxase	MOB-typer-Mpf	MOB-typer-oriT	MOB-typer-mobility	COPLA-PTU	COPLA-host-range	COPLA-score	REHAB-sample	REHAB-location	REHAB-timepoint	BSI-date	BSI-category	BSI-GP	BSI-sex	BSI-age	BioProject	BioSample
OX-BSI-1_1	000774a6-5784-466e-8cb7-caa111dcafc5	000774a6-5784-466e-8cb7-caa111dcafc5_chromo	Chromosome	BSI	5145197	50.74	ecoli	131	NA	NA	NA	NA	aac(3)-IId,aadA2,blaTEM-1,catA1,dfrA12,mph(A),qacEdelta1,sul1	IS100kyp,IS1F,IS26,IS600,IS609,IS6100,IS911,ISCfr1,ISCro1,ISEc1,ISEc16,ISEc20,ISEc22,ISEc24,ISEc30,ISEc38,ISEc49,ISShdy2	NA	acn-BAC0003,acrA-BAC0005,acrD/yffA-BAC0008,acrE/envC-BAC0009,acrF/envD-BAC0010,actP/yjcG-BAC0564,arsC-BAC0582,arsC-BAC0583,asr-BAC0038,baeS-BAC0040,bfrA-BAC0048,bhsA/ycfR/comC-BAC0049,comR/ycfQ-BAC0076,copA-BAC0725,corA-BAC0086,corB-BAC0643,corD-BAC0644,cpxA-BAC0532,cueR/ybbI-BAC0105,cusA/ybdE-BAC0107,cusB-BAC0108,cusC/ylcB-BAC0109,cusF/cusX-BAC0110,cusR/ylcA-BAC0111,cusS-BAC0112,cutA-BAC0113,cut…	NA	NA	NA	NA	NA	NA	NA	NA	NA	NA	2018-02-08	community	K83018	M	88	PRJNA604975	SAMN18263320
OX-BSI-1_2	000774a6-5784-466e-8cb7-caa111dcafc5	000774a6-5784-466e-8cb7-caa111dcafc5_2	Plasmid	BSI	125574	50.85	ecoli	131	NA	NA	1	123	NA	IS100kyp,IS21,ISEc53	Col156_1,IncFIB(AP001918)_1,IncFII(29)_1_pUTI89	NA	MOBF,MOBP	MPF_F	MOBF	conjugative	PTU-FE	III	0.9941	NA	NA	NA	2018-02-08	community	K83018	M	88	PRJNA604975	SAMN18263320
OX-BSI-2_2	0055f81e-2eac-46d9-a3b8-069d8eafe872	0055f81e-2eac-46d9-a3b8-069d8eafe872_2	Plasmid	BSI	140754	52.33	ecoli	12	NA	NA	5	68	aph(3'')-Ib,aph(6)-Id,blaTEM-1,sul2	IS1203,IS150,IS1A,IS1B,IS1R,IS5,ISEc12,ISKpn26	IncFIA_1,IncFIB(AP001918)_1,IncFII(pRSB107)_1_pRSB107	iclR-BAC0196,merA-BAC0652,merC-BAC0664,merD-BAC0666,merE-BAC0670,merP-BAC0678,merR-BAC0232,merT-BAC0693,wtpC-BAC0604	MOBF	MPF_F	MOBF	conjugative	PTU-FE	III	0.994	NA	NA	NA	2009-06-21	healthcare associated 0-30d	K84014	M	65	PRJNA604975	SAMN18263315
OX-BSI-2_1	0055f81e-2eac-46d9-a3b8-069d8eafe872	0055f81e-2eac-46d9-a3b8-069d8eafe872_chromo	Chromosome	BSI	5212006	50.47	ecoli	12	NA	NA	NA	NA	NA	IS1351,IS1397,IS2,IS200C,IS30,IS621,IS682,ISEc13,ISEc16,ISEc20,ISEc40,ISEc41,ISEc42,ISKpn26,ISSd1,ISSen4	NA	acn-BAC0003,acrA-BAC0005,acrB-BAC0006,acrD/yffA-BAC0008,acrE/envC-BAC0009,acrF/envD-BAC0010,actP/yjcG-BAC0564,adeE-BAC0013,arsC-BAC0582,arsC-BAC0583,asr-BAC0038,baeS-BAC0040,bfrA-BAC0048,bhsA/ycfR/comC-BAC0049,comR/ycfQ-BAC0076,copA-BAC0725,copS-BAC0752,corA-BAC0086,corB-BAC0643,corD-BAC0644,cpxA-BAC0532,cueR/ybbI-BAC0105,cusA/ybdE-BAC0107,cusB-BAC0108,cusC/ylcB-BAC0109,cusF/cusX-BAC0110,cusR/ylc…	NA	NA	NA	NA	NA	NA	NA	NA	NA	NA	2009-06-21	healthcare associated 0-30d	K84014	M	65	PRJNA604975	SAMN18263315
OX-BSI-3_2	00a6bb9a-799b-43d6-823a-4651c0452a2f	00a6bb9a-799b-43d6-823a-4651c0452a2f_2	Plasmid	BSI	113351	52.97	ecoli	73	NA	NA	5	68	dfrA14,mph(A),tet(B)	IS1A,IS1X2,IS5,IS5075,ISVsa5	IncFIA_1,IncFIB(AP001918)_1,IncFII(pRSB107)_1_pRSB107	blt-BAC0050,iclR-BAC0196,merA-BAC0652,merC-BAC0664,merD-BAC0666,merE-BAC0670,merP-BAC0678,merR-BAC0232,merT-BAC0693,wtpC-BAC0604	MOBF,MOBP	MPF_F	MOBF	conjugative	PTU-FE	III	0.9941	NA	NA	NA	2018-02-07	community	K84041	F	86	PRJNA604975	SAMN18263312
OX-BSI-3_1	00a6bb9a-799b-43d6-823a-4651c0452a2f	00a6bb9a-799b-43d6-823a-4651c0452a2f_chromo	Chromosome	BSI	4971293	50.61	ecoli	73	NA	NA	NA	NA	blaEC-5	IS1203,IS1X2,IS30,IS629,IS630,ISEc20,ISEc39,ISEc40,ISEc41,ISEc42	NA	acn-BAC0003,acrA-BAC0005,acrD/yffA-BAC0008,acrE/envC-BAC0009,acrF/envD-BAC0010,actP/yjcG-BAC0564,arsC-BAC0582,arsC-BAC0583,asr-BAC0038,baeS-BAC0040,bfrA-BAC0048,bhsA/ycfR/comC-BAC0049,comR/ycfQ-BAC0076,copA-BAC0725,corA-BAC0086,corB-BAC0643,corD-BAC0644,cpxA-BAC0532,cueO-BAC0103,cueR/ybbI-BAC0105,cusA/ybdE-BAC0107,cusB-BAC0108,cusC/ylcB-BAC0109,cusF/cusX-BAC0110,cusR/ylcA-BAC0111,cusS-BAC0112,cut…	NA	NA	NA	NA	NA	NA	NA	NA	NA	NA	2018-02-07	community	K84041	F	86	PRJNA604975	SAMN18263312
OX-BSI-4_2	00f9ff36-dcc6-453b-be28-04a53e482160	00f9ff36-dcc6-453b-be28-04a53e482160_2	Plasmid	BSI	171738	50.8	ecoli	155	NA	NA	2	100	aph(3'')-Ib,aph(6)-Id,blaTEM-1,dfrA14,sul2,tet(A)	IS1X2,IS30,IS5075,IS629,IS91,ISEc17,ISEc8,Tn3	IncFIA_1,IncFIB(AP001918)_1,IncFIC(FII)_1	blt-BAC0050,sitA-BAC0349,sitB-BAC0350,sitC-BAC0351,sitD-BAC0352,smdB-BAC0354,tupC-BAC0607	MOBF,MOBP	MPF_F	-	conjugative	PTU-?	III	0.6905	NA	NA	NA	2018-03-09	community	K84610	M	73	PRJNA604975	NA
OX-BSI-4_1	00f9ff36-dcc6-453b-be28-04a53e482160	00f9ff36-dcc6-453b-be28-04a53e482160_chromo	Chromosome	BSI	4771553	50.69	ecoli	155	NA	NA	NA	NA	NA	IS100kyp,IS1G,IS1H,IS3,IS4,IS600,ISEc1,ISEc16,ISEc22,ISEc26,ISEc30,ISEc38,ISEcl3,ISPrst3,ISShdy2	NA	acn-BAC0003,acrA-BAC0005,acrB-BAC0006,acrD/yffA-BAC0008,acrE/envC-BAC0009,acrF/envD-BAC0010,actP/yjcG-BAC0564,arsB-BAC0576,arsC-BAC0583,arsC-BAC0584,arsP-BAC0036,arsR-BAC0594,asr-BAC0038,baeS-BAC0040,bfrA-BAC0048,bhsA/ycfR/comC-BAC0049,comR/ycfQ-BAC0076,copA-BAC0725,copS-BAC0752,corA-BAC0086,corB-BAC0643,corD-BAC0644,cpxA-BAC0532,cueO-BAC0103,cueR/ybbI-BAC0105,cusA/ybdE-BAC0107,cusB-BAC0108,cusC/…	NA	NA	NA	NA	NA	NA	NA	NA	NA	NA	2018-03-09	community	K84610	M	73	PRJNA604975	NA
OX-BSI-5_1	01471ea7-7e7a-43e2-84d0-aa04e1df6131	01471ea7-7e7a-43e2-84d0-aa04e1df6131_chromo	Chromosome	BSI	6112097	54.99	koxytoca	-	NA	NA	NA	NA	blaOXY-2-7,oqxA,oqxB	IS1400,ISEc10,ISEc33,ISEc36,ISEcl1,ISSaen1	NA	acn-BAC0003,acrA-BAC0005,acrC-BAC0007,acrD-BAC0563,acrE/envC-BAC0009,acrF/envD-BAC0010,actP/yjcG-BAC0564,adeE-BAC0013,arsB-BAC0576,arsC-BAC0583,arsC-BAC0584,arsR-BAC0589,baeS-BAC0040,bepG-BAC0046,bfrA-BAC0048,bhsA/ycfR/comC-BAC0049,comR/ycfQ-BAC0076,copA-BAC0725,copS-BAC0637,corA-BAC0086,corB-BAC0643,corD-BAC0644,cpxA-BAC0532,cueR/ybbI-BAC0105,cuiD-BAC0106,cusA/ybdE-BAC0107,cusB-BAC0108,cutA-BAC0…	NA	NA	NA	NA	NA	NA	NA	NA	NA	NA	2018-04-25	nosocomial	K84030	M	79	PRJNA604975	NA
OX-BSI-6_1	017d25a4-a6ad-4826-9f65-e7a74b1c95cf	017d25a4-a6ad-4826-9f65-e7a74b1c95cf_chromo	Chromosome	BSI	5000028	50.56	ecoli	95	NA	NA	NA	NA	NA	IS100kyp,IS1203,IS1397,IS200C,IS621,ISEc20,ISEc30,ISEc38,ISEc40,ISEc45,ISEc48,ISEc53,ISEc8	NA	acn-BAC0003,acrA-BAC0005,acrD/yffA-BAC0008,acrE/envC-BAC0009,acrF/envD-BAC0010,actP/yjcG-BAC0564,arsC-BAC0582,arsC-BAC0583,asr-BAC0038,baeS-BAC0040,bfrA-BAC0048,bhsA/ycfR/comC-BAC0049,comR/ycfQ-BAC0076,copA-BAC0725,corA-BAC0086,corB-BAC0643,corD-BAC0644,cpxA-BAC0532,cueO-BAC0103,cueR/ybbI-BAC0105,cusA/ybdE-BAC0107,cusB-BAC0108,cusC/ylcB-BAC0109,cusF/cusX-BAC0110,cusR/ylcA-BAC0111,cusS-BAC0112,cut…	NA	NA	NA	NA	NA	NA	NA	NA	NA	NA	2009-03-07	healthcare associated 0-30d	K84037	F	86	PRJNA604975	SAMN18263301
OX-BSI-6_2	017d25a4-a6ad-4826-9f65-e7a74b1c95cf	017d25a4-a6ad-4826-9f65-e7a74b1c95cf_2	Plasmid	BSI	114229	51.02	ecoli	95	NA	NA	1	123	NA	IS100kyp,IS21,IS26,ISEc10,ISEc53	Col156_1,IncFIB(AP001918)_1,IncFII(29)_1_pUTI89	NA	MOBF,MOBP	MPF_F	MOBF	conjugative	PTU-FE	III	1	NA	NA	NA	2009-03-07	healthcare associated 0-30d	K84037	F	86	PRJNA604975	SAMN18263301
OX-BSI-7_3	0233ca07-2f55-4d5c-9187-8af851e62dcb	0233ca07-2f55-4d5c-9187-8af851e62dcb_3	Plasmid	BSI	30275	41.45	ecoli	131	202	2	60	10	NA	NA	NA	NA	-	-	-	non-mobilizable	-	-	1	NA	NA	NA	2016-02-12	healthcare associated 0-30d	K84028	M	79	PRJNA604975	SAMN18263292
OX-BSI-7_2	0233ca07-2f55-4d5c-9187-8af851e62dcb	0233ca07-2f55-4d5c-9187-8af851e62dcb_2	Plasmid	BSI	118441	51.06	ecoli	131	201	2	5	68	blaCTX-M-27	IS100kyp,IS150,IS1A,IS1B,IS1R,IS1X2,IS26,IS5	Col156_1,IncFIA_1,IncFIB(AP001918)_1,IncFII(pRSB107)_1_pRSB107	NA	MOBF,MOBF,MOBP	MPF_F	MOBF	conjugative	PTU-FE	III	1	NA	NA	NA	2016-02-12	healthcare associated 0-30d	K84028	M	79	PRJNA604975	SAMN18263292
OX-BSI-7_1	0233ca07-2f55-4d5c-9187-8af851e62dcb	0233ca07-2f55-4d5c-9187-8af851e62dcb_chromo	Chromosome	BSI	5037918	50.74	ecoli	131	NA	NA	NA	NA	NA	IS100kyp,IS1203,IS2,IS200C,IS30,IS609,ISEc1,ISEc20,ISEc21,ISEc24,ISEc38,ISEc53,ISEc8,ISSd1	NA	acn-BAC0003,acrA-BAC0005,acrD/yffA-BAC0008,acrE/envC-BAC0009,acrF/envD-BAC0010,actP/yjcG-BAC0564,arsC-BAC0582,arsC-BAC0583,asr-BAC0038,baeS-BAC0040,bfrA-BAC0048,bhsA/ycfR/comC-BAC0049,comR/ycfQ-BAC0076,copA-BAC0725,corA-BAC0086,corB-BAC0643,corD-BAC0644,cpxA-BAC0532,cueO-BAC0103,cueR/ybbI-BAC0105,cusA/ybdE-BAC0107,cusB-BAC0108,cusC/ylcB-BAC0109,cusF/cusX-BAC0110,cusR/ylcA-BAC0111,cusS-BAC0112,cut…	NA	NA	NA	NA	NA	NA	NA	NA	NA	NA	2016-02-12	healthcare associated 0-30d	K84028	M	79	PRJNA604975	SAMN18263292
OX-BSI-7_4	0233ca07-2f55-4d5c-9187-8af851e62dcb	0233ca07-2f55-4d5c-9187-8af851e62dcb_4	Plasmid	BSI	5167	47.49	ecoli	131	203	2	4	69	NA	NA	Col156_1	NA	MOBQ	-	-	mobilizable	PTU-E7	III	1	NA	NA	NA	2016-02-12	healthcare associated 0-30d	K84028	M	79	PRJNA604975	SAMN18263292
OX-BSI-7_5	0233ca07-2f55-4d5c-9187-8af851e62dcb	0233ca07-2f55-4d5c-9187-8af851e62dcb_5	Plasmid	BSI	1549	50.94	ecoli	131	204	2	8	57	NA	NA	Col(MG828)_1	NA	-	-	MOB_unknown,MOBP	mobilizable	PTU-E9	VI	1	NA	NA	NA	2016-02-12	healthcare associated 0-30d	K84028	M	79	PRJNA604975	SAMN18263292
OX-BSI-8_1	02745057-7b57-442c-88d1-c4eab6209542	02745057-7b57-442c-88d1-c4eab6209542_chromo	Chromosome	BSI	4755121	50.73	ecoli	23	NA	NA	NA	NA	NA	IS1A,IS1F,IS1H,IS3,IS4,IS911,ISEc23,ISEc8	NA	acn-BAC0003,acrA-BAC0005,acrB-BAC0006,acrD/yffA-BAC0008,acrE/envC-BAC0009,actP/yjcG-BAC0564,arsB-BAC0576,arsC-BAC0583,arsC-BAC0584,arsR-BAC0594,asr-BAC0038,baeS-BAC0040,bfrA-BAC0048,bhsA/ycfR/comC-BAC0049,comR/ycfQ-BAC0076,copA-BAC0725,copS-BAC0752,corA-BAC0086,corB-BAC0643,corD-BAC0644,cpxA-BAC0532,cueO-BAC0103,cueR/ybbI-BAC0105,cusA/ybdE-BAC0107,cusB-BAC0108,cusC/ylcB-BAC0109,cusF/cusX-BAC0110,…	NA	NA	NA	NA	NA	NA	NA	NA	NA	NA	2018-05-19	healthcare associated 31-365d	K84040	M	82	PRJNA604975	SAMN18263290
OX-BSI-8_4	02745057-7b57-442c-88d1-c4eab6209542	02745057-7b57-442c-88d1-c4eab6209542_4	Plasmid	BSI	65486	50.63	ecoli	23	NA	NA	77	8	NA	NA	NA	NA	MOBF	MPF_F	MOBF	conjugative	PTU-FE	III	0.994	NA	NA	NA	2018-05-19	healthcare associated 31-365d	K84040	M	82	PRJNA604975	SAMN18263290
OX-BSI-8_3	02745057-7b57-442c-88d1-c4eab6209542	02745057-7b57-442c-88d1-c4eab6209542_3	Plasmid	BSI	98179	50.08	ecoli	23	NA	NA	3	73	blaTEM-1,qnrS1	ISKpn19,Tn3	IncI1_1_Alpha	pmrG-BAC0486	MOBP	MPF_I	MOBP	conjugative	PTU-I1	III	1	NA	NA	NA	2018-05-19	healthcare associated 31-365d	K84040	M	82	PRJNA604975	SAMN18263290
OX-BSI-8_2	02745057-7b57-442c-88d1-c4eab6209542	02745057-7b57-442c-88d1-c4eab6209542_2	Plasmid	BSI	107195	49.26	ecoli	23	NA	NA	2	100	NA	IS2,IS30,IS629,ISEc17,ISEc23,ISEc8	IncFIB(AP001918)_1	sitA-BAC0349,sitB-BAC0350,sitC-BAC0351,sitD-BAC0352,smdB-BAC0354,tupC-BAC0607	MOBF,MOBP	MPF_F	-	conjugative	PTU-FE	III	1	NA	NA	NA	2018-05-19	healthcare associated 31-365d	K84040	M	82	PRJNA604975	SAMN18263290
OX-BSI-9_2	0289773b-c7e6-4c72-be2b-1da8dc1b0ab8	0289773b-c7e6-4c72-be2b-1da8dc1b0ab8_2	Plasmid	BSI	65282	54.36	koxytoca	19	NA	NA	175	3	NA	NA	IncFII(Yp)_1_Yersenia	NA	MOBF	MPF_F	-	conjugative	PTU-E42	I	1	NA	NA	NA	2018-10-26	community	K84040	M	73	PRJNA604975	NA
OX-BSI-9_1	0289773b-c7e6-4c72-be2b-1da8dc1b0ab8	0289773b-c7e6-4c72-be2b-1da8dc1b0ab8_chromo	Chromosome	BSI	5878189	55.18	koxytoca	19	NA	NA	NA	NA	blaOXY-2-1,oqxA,oqxB	NA	NA	acn-BAC0003,acrA-BAC0005,acrC-BAC0007,acrD-BAC0563,acrE/envC-BAC0009,acrF/envD-BAC0010,actP/yjcG-BAC0564,adeE-BAC0013,arsB-BAC0578,arsC-BAC0583,arsC-BAC0584,arsR-BAC0589,baeR-BAC0039,baeS-BAC0040,bepG-BAC0046,bfrA-BAC0048,bhsA/ycfR/comC-BAC0049,comR/ycfQ-BAC0076,copA-BAC0725,copS-BAC0637,corA-BAC0086,corB-BAC0643,corD-BAC0644,cpxA-BAC0532,cueR/ybbI-BAC0105,cuiD-BAC0106,cusA/ybdE-BAC0107,cusB-BAC0…	NA	NA	NA	NA	NA	NA	NA	NA	NA	NA	2018-10-26	community	K84040	M	73	PRJNA604975	NA
OX-BSI-10_3	02f7df04-03d7-4300-8748-6edb30cf2f5c	02f7df04-03d7-4300-8748-6edb30cf2f5c_3	Plasmid	BSI	77976	49.27	ecoli	88	NA	NA	113	5	NA	NA	IncFIA(HI1)_1_HI1,IncFIB(pB171)_1_pB171	robA-BAC0334	MOBF	MPF_F	MOBF	conjugative	PTU-FE	III	0.9655	NA	NA	NA	2018-01-27	healthcare associated 31-365d	K84058	M	83	PRJNA604975	SAMN18263287
OX-BSI-10_2	02f7df04-03d7-4300-8748-6edb30cf2f5c	02f7df04-03d7-4300-8748-6edb30cf2f5c_2	Plasmid	BSI	127969	49.99	ecoli	88	NA	NA	NA	NA	NA	IS186B,IS1F,IS30,IS4321R,ISEc8,ISKpn28,ISSen4	IncFIA(HI1)_1_HI1,IncY_1	arsA-BAC0030,arsB-BAC0576,arsC-BAC0583,arsD-BAC0587,arsR-BAC0591,oxyRkp-BAC0536,wtpC-BAC0604	MOBH	-	MOBF	mobilizable	-	-	1	NA	NA	NA	2018-01-27	healthcare associated 31-365d	K84058	M	83	PRJNA604975	SAMN18263287
OX-BSI-10_1	02f7df04-03d7-4300-8748-6edb30cf2f5c	02f7df04-03d7-4300-8748-6edb30cf2f5c_chromo	Chromosome	BSI	4856086	50.77	ecoli	88	NA	NA	NA	NA	NA	IS100kyp,IS1H,IS1SD,IS3,IS609,IS911,ISEc38,ISKpn28,ISSd1	NA	acn-BAC0003,acrA-BAC0005,acrB-BAC0006,acrD/yffA-BAC0008,acrE/envC-BAC0009,acrF/envD-BAC0010,actP/yjcG-BAC0564,arsB-BAC0576,arsC-BAC0583,arsC-BAC0584,arsR-BAC0594,asr-BAC0038,baeS-BAC0040,bfrA-BAC0048,bhsA/ycfR/comC-BAC0049,comR/ycfQ-BAC0076,copA-BAC0725,copG-BAC0717,copS-BAC0752,corA-BAC0086,corB-BAC0643,corD-BAC0644,cpxA-BAC0532,cueO-BAC0103,cueR/ybbI-BAC0105,cusA/ybdE-BAC0107,cusB-BAC0108,cusC/…	NA	NA	NA	NA	NA	NA	NA	NA	NA	NA	2018-01-27	healthcare associated 31-365d	K84058	M	83	PRJNA604975	SAMN18263287
OX-BSI-11_1	034e77f6-e525-42a6-a3fe-c86854b0622f	034e77f6-e525-42a6-a3fe-c86854b0622f_chromo	Chromosome	BSI	5234687	50.66	ecoli	38	NA	NA	NA	NA	aph(3'')-Ib,aph(6)-Id,blaTEM-1,catA1,dfrA7,qacEdelta1,sul1,sul2,tet(D)	IS100kyp,IS1203,IS1H,IS21,ISEc12,ISEc38,ISEc46,ISEc49,ISVsa3	NA	acn-BAC0003,acrA-BAC0005,acrB-BAC0006,acrD/yffA-BAC0008,acrE/envC-BAC0009,acrF/envD-BAC0010,actP/yjcG-BAC0564,arsB-BAC0576,arsC-BAC0582,arsC-BAC0583,arsP-BAC0036,arsR-BAC0594,asr-BAC0038,baeS-BAC0040,bfrA-BAC0048,bhsA/ycfR/comC-BAC0049,comR/ycfQ-BAC0076,copA-BAC0725,copS-BAC0752,corA-BAC0086,corB-BAC0643,corC-BAC0088,corD-BAC0644,cpxA-BAC0532,cueO-BAC0103,cueR/ybbI-BAC0105,cusA/ybdE-BAC0107,cusB-…	NA	NA	NA	NA	NA	NA	NA	NA	NA	NA	2018-01-28	community	K84009	M	85	PRJNA604975	SAMN18263284
OX-BSI-11_2	034e77f6-e525-42a6-a3fe-c86854b0622f	034e77f6-e525-42a6-a3fe-c86854b0622f_2	Plasmid	BSI	102050	50.93	ecoli	38	NA	NA	15	38	NA	IS26,ISEc10,ISEc22	Col156_1,IncFIB(AP001918)_1,IncFIC(FII)_1	cpxR-BAC0533	MOBF,MOBP	MPF_F	MOBF	conjugative	PTU-FE	III	0.994	NA	NA	NA	2018-01-28	community	K84009	M	85	PRJNA604975	SAMN18263284
OX-BSI-12_2	0427d9d9-0483-47be-884d-7ec408034770	0427d9d9-0483-47be-884d-7ec408034770_2	Plasmid	BSI	173350	50.45	ecoli	38	NA	NA	15	38	blaTEM-1,tet(B)	IS10L,IS2,IS26,ISCro1,ISEc10,ISEc22,ISKpn26,ISVsa5,Tn3	Col156_1,IncFIA_1,IncFIB(AP001918)_1,IncFIC(FII)_1	blt-BAC0050,cpxR-BAC0533,fecD-BAC0163,fecE-BAC0164,sitA-BAC0349,sitB-BAC0350,sitC-BAC0351,sitD-BAC0352	MOBF,MOBP	MPF_F	MOBP	conjugative	PTU-FE	III	1	NA	NA	NA	2018-06-20	community	K84038	M	47	PRJNA604975	SAMN18263271
OX-BSI-12_1	0427d9d9-0483-47be-884d-7ec408034770	0427d9d9-0483-47be-884d-7ec408034770_chromo	Chromosome	BSI	5164303	50.64	ecoli	38	NA	NA	NA	NA	aph(3'')-Ib,aph(6)-Id,sul2	IS1H,IS1R,ISEc22,ISEc30,ISEc38,ISEc46,ISEc8,ISEcl1,ISErsp1,ISVsa3	NA	acn-BAC0003,acrA-BAC0005,acrD/yffA-BAC0008,acrE/envC-BAC0009,acrF/envD-BAC0010,actP/yjcG-BAC0564,arsB-BAC0576,arsC-BAC0582,arsC-BAC0583,arsP-BAC0036,arsR-BAC0594,asr-BAC0038,baeS-BAC0040,bfrA-BAC0048,bhsA/ycfR/comC-BAC0049,comR/ycfQ-BAC0076,copA-BAC0725,copS-BAC0752,corA-BAC0086,corB-BAC0643,corC-BAC0088,corD-BAC0644,cpxA-BAC0532,cueO-BAC0103,cueR/ybbI-BAC0105,cusA/ybdE-BAC0107,cusB-BAC0108,cusC/…	NA	NA	NA	NA	NA	NA	NA	NA	NA	NA	2018-06-20	community	K84038	M	47	PRJNA604975	SAMN18263271
OX-BSI-13_3	045c06a3-45c7-4d4a-8345-b6b47a3c3458	045c06a3-45c7-4d4a-8345-b6b47a3c3458_3	Plasmid	BSI	117012	52.18	kpneumoniae	490	NA	NA	13	41	aac(3)-IIe,aac(6')-Ib-cr5,aph(3'')-Ib,aph(6)-Id,blaCTX-M-15,blaOXA-1,blaTEM-1,catB3,dfrA14,sul2	IS102,IS5075,IS6100,ISEc9,ISKpn11	IncFII_1_pKP91	NA	MOBF,MOBF	MPF_F	-	conjugative	PTU-FK	III	0.9688	NA	NA	NA	2012-01-14	healthcare associated 31-365d	K84060	M	91	PRJNA604975	SAMN14345075
OX-BSI-13_1	045c06a3-45c7-4d4a-8345-b6b47a3c3458	045c06a3-45c7-4d4a-8345-b6b47a3c3458_chromo	Chromosome	BSI	5410921	57.36	kpneumoniae	490	NA	NA	NA	NA	blaSHV-1,fosA,oqxA,oqxB	IS5075,Tn5403	NA	acn-BAC0003,acrA-BAC0005,acrB-BAC0006,acrC-BAC0007,acrD-BAC0563,acrE/envC-BAC0009,acrF/envD-BAC0010,actP/yjcG-BAC0564,adeE-BAC0013,arsB-BAC0578,arsC-BAC0582,arsC-BAC0583,arsR-BAC0589,baeR-BAC0596,baeS-BAC0040,bepG-BAC0046,bfrA-BAC0048,bhsA/ycfR/comC-BAC0049,cepA-BAC0061,comR/ycfQ-BAC0076,copA-BAC0725,corA-BAC0086,corB-BAC0643,corD-BAC0644,corR-BAC0089,cpxA-BAC0532,cueR/ybbI-BAC0105,cusA/ybdE-BAC0…	NA	NA	NA	NA	NA	NA	NA	NA	NA	NA	2012-01-14	healthcare associated 31-365d	K84060	M	91	PRJNA604975	SAMN14345075
OX-BSI-13_4	045c06a3-45c7-4d4a-8345-b6b47a3c3458	045c06a3-45c7-4d4a-8345-b6b47a3c3458_4	Plasmid	BSI	15409	45.55	kpneumoniae	490	3	19	20	32	NA	IS102,IS1X4,ISSen4	IncFIA(HI1)_1_HI1	NA	-	-	MOBF	mobilizable	-	-	1	NA	NA	NA	2012-01-14	healthcare associated 31-365d	K84060	M	91	PRJNA604975	SAMN14345075
OX-BSI-13_7	045c06a3-45c7-4d4a-8345-b6b47a3c3458	045c06a3-45c7-4d4a-8345-b6b47a3c3458_7	Plasmid	BSI	5366	52.39	kpneumoniae	490	NA	NA	83	7	NA	Tn5403	NA	NA	-	-	-	non-mobilizable	-	-	1	NA	NA	NA	2012-01-14	healthcare associated 31-365d	K84060	M	91	PRJNA604975	SAMN14345075
OX-BSI-13_6	045c06a3-45c7-4d4a-8345-b6b47a3c3458	045c06a3-45c7-4d4a-8345-b6b47a3c3458_6	Plasmid	BSI	5388	41.65	kpneumoniae	490	NA	NA	114	5	NA	NA	Col440I_1	NA	-	-	-	non-mobilizable	-	-	1	NA	NA	NA	2012-01-14	healthcare associated 31-365d	K84060	M	91	PRJNA604975	SAMN14345075
OX-BSI-13_5	045c06a3-45c7-4d4a-8345-b6b47a3c3458	045c06a3-45c7-4d4a-8345-b6b47a3c3458_5	Plasmid	BSI	9553	51.74	kpneumoniae	490	5	32	18	34	NA	Tn5403	NA	NA	MOBP	-	-	mobilizable	-	-	1	NA	NA	NA	2012-01-14	healthcare associated 31-365d	K84060	M	91	PRJNA604975	SAMN14345075
OX-BSI-13_2	045c06a3-45c7-4d4a-8345-b6b47a3c3458	045c06a3-45c7-4d4a-8345-b6b47a3c3458_2	Plasmid	BSI	224365	51.11	kpneumoniae	490	NA	NA	19	33	NA	IS1A,IS1X4,IS903,ISEc21,ISEc36,ISKox1,ISKpn2,ISKpn21,ISKpn24,ISSen3	IncFIB(K)_1_Kpn3	copG-BAC0717,fecE-BAC0164,pcoA-BAC0303,pcoB-BAC0304,pcoC-BAC0305,pcoD-BAC0306,pcoE-BAC0307,pcoR-BAC0308,pcoS-BAC0309,pstB-BAC0316,silA-BAC0341,silB-BAC0342,silC-BAC0343,silE-BAC0344,silF-BAC0345,silP-BAC0346,silR-BAC0347,silS-BAC0348	-	-	-	non-mobilizable	PTU-E35	I	1	NA	NA	NA	2012-01-14	healthcare associated 31-365d	K84060	M	91	PRJNA604975	SAMN14345075
OX-BSI-14_1	05b38397-9080-496b-86de-69d0a57fc9ab	05b38397-9080-496b-86de-69d0a57fc9ab_chromo	Chromosome	BSI	5311709	50.64	ecoli	38	NA	NA	NA	NA	aph(3'')-Ib,aph(6)-Id,blaTEM-1,catA1,dfrA7,qacEdelta1,sul1,sul1,sul2,tet(D)	IS100kyp,IS1203,IS1H,IS21,IS30,IS4,ISEc17,ISEc38,ISEc46,ISEc49,ISVsa3	NA	acn-BAC0003,acrA-BAC0005,acrD/yffA-BAC0008,acrE/envC-BAC0009,acrF/envD-BAC0010,actP/yjcG-BAC0564,arsB-BAC0576,arsC-BAC0582,arsC-BAC0583,arsP-BAC0036,arsR-BAC0594,asr-BAC0038,baeS-BAC0040,bfrA-BAC0048,bhsA/ycfR/comC-BAC0049,comR/ycfQ-BAC0076,copA-BAC0725,copS-BAC0752,corA-BAC0086,corB-BAC0643,corC-BAC0088,corD-BAC0644,corR-BAC0089,cpxA-BAC0532,cueO-BAC0103,cueR/ybbI-BAC0105,cusA/ybdE-BAC0107,cusB-…	NA	NA	NA	NA	NA	NA	NA	NA	NA	NA	2018-06-18	healthcare associated 31-365d	K84075	F	68	PRJNA604975	SAMN18263259
OX-BSI-14_2	05b38397-9080-496b-86de-69d0a57fc9ab	05b38397-9080-496b-86de-69d0a57fc9ab_2	Plasmid	BSI	113480	50.95	ecoli	38	28	2	15	38	NA	IS1X2,IS2,IS26,ISEc10,ISEc22,ISKpn26	Col156_1,IncFIB(AP001918)_1,IncFIC(FII)_1	cpxR-BAC0533,fecD-BAC0163,fecE-BAC0164	MOBF,MOBP	MPF_F	MOBF	conjugative	PTU-FE	III	1	NA	NA	NA	2018-06-18	healthcare associated 31-365d	K84075	F	68	PRJNA604975	SAMN18263259
OX-BSI-15_2	05baef21-6e93-4789-a138-d3782474750b	05baef21-6e93-4789-a138-d3782474750b_2	Plasmid	BSI	185857	50.45	kpneumoniae	86	NA	NA	78	8	NA	IS100kyp,IS1A,IS1N,IS903B,ISKox1,ISKpn28,ISSpu2	IncFIB(K)_1_Kpn3,IncHI1B_1_pNDM-MAR	copG-BAC0717,nikD-BAC0273,nikE-BAC0274,pbrA-BAC0298,pbrB/pbrC-BAC0299,pbrR-BAC0301,pcoA-BAC0303,pcoB-BAC0304,pcoC-BAC0305,pcoD-BAC0306,pcoR-BAC0308,pcoS-BAC0309,silA-BAC0341,silB-BAC0342,silC-BAC0343,silE-BAC0344,silF-BAC0345,silP-BAC0346,silR-BAC0347,silS-BAC0348,smdB-BAC0354,terA-BAC0386,terB-BAC0387,terC-BAC0388,terE-BAC0390,terW-BAC0391,terZ-BAC0392	-	-	-	non-mobilizable	PTU-E21	I	1	NA	NA	NA	2018-08-23	nosocomial	K84030	M	80	PRJNA604975	NA
OX-BSI-15_1	05baef21-6e93-4789-a138-d3782474750b	05baef21-6e93-4789-a138-d3782474750b_chromo	Chromosome	BSI	5273391	57.56	kpneumoniae	86	NA	NA	NA	NA	blaSHV-1,fosA10,oqxA11,oqxB19	ISSty2	NA	acn-BAC0003,acrA-BAC0005,acrB-BAC0006,acrC-BAC0007,acrD-BAC0563,acrE/envC-BAC0009,acrF/envD-BAC0010,actP/yjcG-BAC0564,adeE-BAC0013,arsB-BAC0576,arsC-BAC0582,arsC-BAC0583,arsR-BAC0589,baeR-BAC0596,baeS-BAC0040,bepG-BAC0046,bfrA-BAC0048,bhsA/ycfR/comC-BAC0049,cepA-BAC0061,comR/ycfQ-BAC0076,copA-BAC0725,corA-BAC0086,corB-BAC0643,corD-BAC0644,corR-BAC0089,cpxA-BAC0532,cueR/ybbI-BAC0105,cusA/ybdE-BAC0…	NA	NA	NA	NA	NA	NA	NA	NA	NA	NA	2018-08-23	nosocomial	K84030	M	80	PRJNA604975	NA
OX-BSI-16_4	06286bfb-e297-4bf6-bee4-75f8722feabe	06286bfb-e297-4bf6-bee4-75f8722feabe_4	Plasmid	BSI	31765	41.32	ecoli	131	NA	NA	43	14	NA	NA	IncX4_1	triA-BAC0396,triC-BAC0398	MOBP	MPF_T	-	conjugative	PTU-X4	III	1	NA	NA	NA	2018-02-23	community	K84026	F	55	PRJNA604975	SAMN18263257
OX-BSI-16_5	06286bfb-e297-4bf6-bee4-75f8722feabe	06286bfb-e297-4bf6-bee4-75f8722feabe_5	Plasmid	BSI	4593	50.47	ecoli	131	NA	NA	61	10	NA	NA	ColRNAI_1	NA	MOBP	-	MOBP	mobilizable	PTU-?	III	0.8902	NA	NA	NA	2018-02-23	community	K84026	F	55	PRJNA604975	SAMN18263257
OX-BSI-16_3	06286bfb-e297-4bf6-bee4-75f8722feabe	06286bfb-e297-4bf6-bee4-75f8722feabe_3	Plasmid	BSI	34238	42.28	ecoli	131	NA	NA	23	26	NA	NA	NA	triA-BAC0396,triC-BAC0398	MOBP	MPF_T	-	conjugative	PTU-X1	III	1	NA	NA	NA	2018-02-23	community	K84026	F	55	PRJNA604975	SAMN18263257
OX-BSI-16_1	06286bfb-e297-4bf6-bee4-75f8722feabe	06286bfb-e297-4bf6-bee4-75f8722feabe_chromo	Chromosome	BSI	5132698	50.71	ecoli	131	NA	NA	NA	NA	NA	IS100kyp,IS1203,IS1F,IS200C,IS30,IS609,ISEc1,ISEc20,ISEc24,ISEc38	NA	acn-BAC0003,acrA-BAC0005,acrD/yffA-BAC0008,acrE/envC-BAC0009,acrF/envD-BAC0010,actP/yjcG-BAC0564,arsC-BAC0582,arsC-BAC0583,asr-BAC0038,baeS-BAC0040,bfrA-BAC0048,bhsA/ycfR/comC-BAC0049,comR/ycfQ-BAC0076,copA-BAC0725,corA-BAC0086,corB-BAC0643,corD-BAC0644,cpxA-BAC0532,cueR/ybbI-BAC0105,cusA/ybdE-BAC0107,cusB-BAC0108,cusC/ylcB-BAC0109,cusF/cusX-BAC0110,cusR/ylcA-BAC0111,cusS-BAC0112,cutA-BAC0113,cut…	NA	NA	NA	NA	NA	NA	NA	NA	NA	NA	2018-02-23	community	K84026	F	55	PRJNA604975	SAMN18263257
OX-BSI-16_2	06286bfb-e297-4bf6-bee4-75f8722feabe	06286bfb-e297-4bf6-bee4-75f8722feabe_2	Plasmid	BSI	116957	51.12	ecoli	131	NA	NA	1	123	NA	IS100kyp,IS21,IS26,ISCro1,ISEc10,ISEc53	Col156_1,IncFIB(AP001918)_1,IncFII(29)_1_pUTI89	NA	MOBF,MOBP	MPF_F	MOBF	conjugative	PTU-FE	III	1	NA	NA	NA	2018-02-23	community	K84026	F	55	PRJNA604975	SAMN18263257
OX-BSI-17_2	064dcc28-eebb-454d-8595-f061980ab5ad	064dcc28-eebb-454d-8595-f061980ab5ad_2	Plasmid	BSI	134643	52.89	ecoli	12	NA	NA	5	68	blaTEM-1,catA1,mph(A),tet(B)	IS1203,IS150,IS1A,IS6100,IS640,ISEc10,ISVsa5,Tn3	IncFIA_1,IncFIB(AP001918)_1	blt-BAC0050,iclR-BAC0196,merA-BAC0652,merC-BAC0664,merD-BAC0666,merE-BAC0670,merP-BAC0678,merR-BAC0232,merT-BAC0693,wtpC-BAC0604	MOBF	MPF_F	MOBF	conjugative	PTU-FE	III	1	NA	NA	NA	2018-09-28	nosocomial	K84017	F	37	PRJNA604975	SAMN18263255
OX-BSI-17_1	064dcc28-eebb-454d-8595-f061980ab5ad	064dcc28-eebb-454d-8595-f061980ab5ad_chromo	Chromosome	BSI	5083691	50.65	ecoli	12	NA	NA	NA	NA	NA	IS100kyp,IS1F,IS1R,IS2,IS621,IS682,ISEc20,ISEc22,ISEc38,ISEc41,ISEc42,ISEc45,ISSd1,ISSen4	NA	acn-BAC0003,acrA-BAC0005,acrD/yffA-BAC0008,acrE/envC-BAC0009,acrF/envD-BAC0010,actP/yjcG-BAC0564,arsC-BAC0582,arsC-BAC0583,asr-BAC0038,baeS-BAC0040,bfrA-BAC0048,bhsA/ycfR/comC-BAC0049,comR/ycfQ-BAC0076,copA-BAC0725,corA-BAC0086,corB-BAC0643,corD-BAC0644,cpxA-BAC0532,cueO-BAC0103,cueR/ybbI-BAC0105,cusA/ybdE-BAC0107,cusB-BAC0108,cusC/ylcB-BAC0109,cusF/cusX-BAC0110,cusR/ylcA-BAC0111,cusS-BAC0112,cut…	NA	NA	NA	NA	NA	NA	NA	NA	NA	NA	2018-09-28	nosocomial	K84017	F	37	PRJNA604975	SAMN18263255
OX-BSI-18_2	06a0eba9-ff16-4640-8adc-f764a4b927a0	06a0eba9-ff16-4640-8adc-f764a4b927a0_2	Plasmid	BSI	114248	51.02	ecoli	12	NA	NA	1	123	NA	IS100kyp,IS21,IS26,ISEc10,ISEc53	Col156_1,IncFIB(AP001918)_1,IncFII(29)_1_pUTI89	NA	MOBF,MOBP	MPF_F	MOBF	conjugative	PTU-FE	III	0.6882	NA	NA	NA	2013-01-23	healthcare associated 31-365d	K84073	F	87	PRJNA604975	NA
OX-BSI-18_1	06a0eba9-ff16-4640-8adc-f764a4b927a0	06a0eba9-ff16-4640-8adc-f764a4b927a0_chromo	Chromosome	BSI	4986237	50.47	ecoli	12	NA	NA	NA	NA	NA	IS1203,IS1F,IS621,IS682,ISEc20,ISEc38,ISEc41,ISEc42,ISEc48,ISEc8,ISSd1,ISSen4	NA	acn-BAC0003,acrA-BAC0005,acrD/yffA-BAC0008,acrE/envC-BAC0009,acrF/envD-BAC0010,actP/yjcG-BAC0564,arsC-BAC0582,arsC-BAC0583,asr-BAC0038,baeS-BAC0040,bfrA-BAC0048,bhsA/ycfR/comC-BAC0049,comR/ycfQ-BAC0076,copA-BAC0725,copS-BAC0752,corA-BAC0086,corB-BAC0643,corD-BAC0644,cpxA-BAC0532,cueO-BAC0103,cueR/ybbI-BAC0105,cusA/ybdE-BAC0107,cusB-BAC0108,cusC/ylcB-BAC0109,cusF/cusX-BAC0110,cusR/ylcA-BAC0111,cus…	NA	NA	NA	NA	NA	NA	NA	NA	NA	NA	2013-01-23	healthcare associated 31-365d	K84073	F	87	PRJNA604975	NA
OX-BSI-19_10	070bfdb2-db66-4db7-be35-d193c883afad	070bfdb2-db66-4db7-be35-d193c883afad_10	Plasmid	BSI	2317	49.24	ecloacae	118	NA	NA	NA	NA	NA	NA	Col440I_1	NA	-	-	MOB_unknown	mobilizable	PTU-E76	III	1	NA	NA	NA	NA	NA	NA	NA	NA	PRJNA604975	NA
OX-BSI-19_2	070bfdb2-db66-4db7-be35-d193c883afad	070bfdb2-db66-4db7-be35-d193c883afad_2	Plasmid	BSI	172566	52.44	ecloacae	118	NA	NA	NA	NA	NA	IS1A,IS30,IS903B,ISEal1,ISSen4,Tn5403	IncFIB(pECLA)_1_pECLA	arsB-BAC0577,arsC-BAC0585,arsH-BAC0034,arsR-BAC0588,copG-BAC0717,fecE-BAC0164,frnE-BAC0170,pcoC-BAC0305,pcoD-BAC0306,pcoE-BAC0307,pcoR-BAC0308,pcoS-BAC0309,silA-BAC0341,silB-BAC0342,silC-BAC0343,silE-BAC0344,silF-BAC0345,silP-BAC0346,silR-BAC0347,silS-BAC0348,terA-BAC0386,terB-BAC0387,terC-BAC0388,terE-BAC0390,terW-BAC0391,terZ-BAC0392	MOBF	MPF_F	-	conjugative	PTU-E60	II	1	NA	NA	NA	NA	NA	NA	NA	NA	PRJNA604975	NA
OX-BSI-19_3	070bfdb2-db66-4db7-be35-d193c883afad	070bfdb2-db66-4db7-be35-d193c883afad_3	Plasmid	BSI	83454	55.57	ecloacae	118	NA	NA	137	4	NA	IS1R,IS26,IS5075,ISKpn26,Tn5403	IncFIA(HI1)_1_HI1,IncFIB(pQil)_1_pQil	merA-BAC0652,merD-BAC0666,merE-BAC0672,merF-BAC0228,merP-BAC0231,merR2-BAC0688,merT-BAC0691	-	-	MOBF	mobilizable	-	-	1	NA	NA	NA	NA	NA	NA	NA	NA	PRJNA604975	NA
OX-BSI-19_4	070bfdb2-db66-4db7-be35-d193c883afad	070bfdb2-db66-4db7-be35-d193c883afad_4	Plasmid	BSI	63589	51.22	ecloacae	118	8	7	84	7	blaOXA-48	NA	IncL/M(pOXA-48)_1_pOXA-48	adeL-BAC0508	MOBP	MPF_I	-	conjugative	PTU-L/M	IV	1	NA	NA	NA	NA	NA	NA	NA	NA	PRJNA604975	NA
OX-BSI-19_5	070bfdb2-db66-4db7-be35-d193c883afad	070bfdb2-db66-4db7-be35-d193c883afad_5	Plasmid	BSI	59292	42.78	ecloacae	118	NA	NA	NA	NA	NA	NA	NA	triC-BAC0398	MOBF	-	-	mobilizable	-	-	1	NA	NA	NA	NA	NA	NA	NA	NA	PRJNA604975	NA
OX-BSI-19_6	070bfdb2-db66-4db7-be35-d193c883afad	070bfdb2-db66-4db7-be35-d193c883afad_6	Plasmid	BSI	6237	50.04	ecloacae	118	NA	NA	NA	NA	NA	NA	Col440II_1,ColRNAI_1	NA	MOBP	-	MOB_unknown	mobilizable	PTU-E3	V	0.8088	NA	NA	NA	NA	NA	NA	NA	NA	PRJNA604975	NA
OX-BSI-19_7	070bfdb2-db66-4db7-be35-d193c883afad	070bfdb2-db66-4db7-be35-d193c883afad_7	Plasmid	BSI	3712	50.05	ecloacae	118	NA	NA	NA	NA	NA	NA	NA	NA	MOBP	-	-	mobilizable	-	-	1	NA	NA	NA	NA	NA	NA	NA	NA	PRJNA604975	NA
OX-BSI-19_8	070bfdb2-db66-4db7-be35-d193c883afad	070bfdb2-db66-4db7-be35-d193c883afad_8	Plasmid	BSI	3223	56.35	ecloacae	118	NA	NA	62	10	NA	NA	Col440II_1,ColRNAI_1	emrE/mvrC-BAC0150	MOBP,MOBP	-	MOB_unknown	mobilizable	PTU-E3	V	0.8657	NA	NA	NA	NA	NA	NA	NA	NA	PRJNA604975	NA
OX-BSI-19_9	070bfdb2-db66-4db7-be35-d193c883afad	070bfdb2-db66-4db7-be35-d193c883afad_9	Plasmid	BSI	2495	51.46	ecloacae	118	NA	NA	28	21	NA	NA	ColRNAI_1	NA	-	-	MOB_unknown	mobilizable	-	-	1	NA	NA	NA	NA	NA	NA	NA	NA	PRJNA604975	NA
OX-BSI-19_1	070bfdb2-db66-4db7-be35-d193c883afad	070bfdb2-db66-4db7-be35-d193c883afad_chromo	Chromosome	BSI	4781131	55.12	ecloacae	118	NA	NA	NA	NA	blaACT,fosA,oqxA,oqxB	IS1F,IS1X4,IS26,ISEc14,ISKpn21,ISLad1	NA	acn-BAC0003,acrA-BAC0005,acrB-BAC0006,acrC-BAC0007,acrD/yffA-BAC0008,acrE/envC-BAC0009,actP/yjcG-BAC0564,adeE-BAC0013,adeF-BAC0014,arsB-BAC0578,arsC-BAC0582,arsC-BAC0583,baeR-BAC0596,baeS-BAC0040,bepG-BAC0046,bfrA-BAC0048,bhsA/ycfR/comC-BAC0049,comR/ycfQ-BAC0076,copA-BAC0725,copG-BAC0717,copR-BAC0719,corA-BAC0641,corB-BAC0643,corC-BAC0088,corD-BAC0644,cpxA-BAC0532,cueR/ybbI-BAC0105,cusA/ybdE-BAC0…	NA	NA	NA	NA	NA	NA	NA	NA	NA	NA	NA	NA	NA	NA	NA	PRJNA604975	NA
OX-BSI-20_1	07576148-4cb2-4e97-b3fe-e50d876b41a1	07576148-4cb2-4e97-b3fe-e50d876b41a1_chromo	Chromosome	BSI	5089185	50.5	ecoli	73	NA	NA	NA	NA	blaEC-5	IS100kyp,IS10L,IS1203,IS200C,IS30,IS630,ISEc13,ISEc16,ISEc20,ISEc23,ISEc39,ISEc41,ISEc42,ISEc8	NA	acn-BAC0003,acrA-BAC0005,acrD/yffA-BAC0008,acrE/envC-BAC0009,acrF/envD-BAC0010,actP/yjcG-BAC0564,arsC-BAC0582,arsC-BAC0583,asr-BAC0038,baeS-BAC0040,bfrA-BAC0048,bhsA/ycfR/comC-BAC0049,comR/ycfQ-BAC0076,copA-BAC0725,corA-BAC0086,corB-BAC0643,corD-BAC0644,cpxA-BAC0532,cueO-BAC0103,cueR/ybbI-BAC0105,cusA/ybdE-BAC0107,cusB-BAC0108,cusC/ylcB-BAC0109,cusF/cusX-BAC0110,cusR/ylcA-BAC0111,cusS-BAC0112,cut…	NA	NA	NA	NA	NA	NA	NA	NA	NA	NA	2009-10-08	healthcare associated 0-30d	K84046	M	80	PRJNA604975	SAMN18263246
OX-BSI-21_2	07758c44-c76b-4691-b921-d63bb5b82202	07758c44-c76b-4691-b921-d63bb5b82202_2	Plasmid	BSI	74287	51.95	ecoli	69	220	2	12	42	blaTEM-1	IS903B,Tn3	IncFIC(FII)_1	NA	MOBF	MPF_F	MOBF	conjugative	PTU-FE	III	1	NA	NA	NA	2018-08-15	healthcare associated 31-365d	K84048	F	64	PRJNA604975	SAMN18263245
OX-BSI-21_6	07758c44-c76b-4691-b921-d63bb5b82202	07758c44-c76b-4691-b921-d63bb5b82202_6	Plasmid	BSI	3257	47.25	ecoli	69	NA	NA	52	11	NA	NA	ColRNAI_1	NA	-	-	MOB_unknown,MOBF,MOBP	mobilizable	PTU-E58	III	1	NA	NA	NA	2018-08-15	healthcare associated 31-365d	K84048	F	64	PRJNA604975	SAMN18263245
OX-BSI-21_4	07758c44-c76b-4691-b921-d63bb5b82202	07758c44-c76b-4691-b921-d63bb5b82202_4	Plasmid	BSI	36046	41.29	ecoli	69	222	3	23	26	NA	NA	NA	triA-BAC0396,triC-BAC0398	MOBP	MPF_T	-	conjugative	PTU-X1	III	1	NA	NA	NA	2018-08-15	healthcare associated 31-365d	K84048	F	64	PRJNA604975	SAMN18263245
OX-BSI-21_3	07758c44-c76b-4691-b921-d63bb5b82202	07758c44-c76b-4691-b921-d63bb5b82202_3	Plasmid	BSI	38215	41.42	ecoli	69	221	2	176	3	NA	NA	IncX4_2	triA-BAC0396,triC-BAC0398	MOBP	MPF_T	-	conjugative	PTU-X4	III	1	NA	NA	NA	2018-08-15	healthcare associated 31-365d	K84048	F	64	PRJNA604975	SAMN18263245
OX-BSI-21_5	07758c44-c76b-4691-b921-d63bb5b82202	07758c44-c76b-4691-b921-d63bb5b82202_5	Plasmid	BSI	10119	48.67	ecoli	69	223	2	4	69	blaTEM-1	Tn3	Col156_1	NA	MOBQ	-	-	mobilizable	-	-	1	NA	NA	NA	2018-08-15	healthcare associated 31-365d	K84048	F	64	PRJNA604975	SAMN18263245
OX-BSI-21_1	07758c44-c76b-4691-b921-d63bb5b82202	07758c44-c76b-4691-b921-d63bb5b82202_chromo	Chromosome	BSI	4906975	50.68	ecoli	69	NA	NA	NA	NA	blaTEM-1	IS1F,IS4,IS911,ISEc46,ISEc8,ISSd1,Tn3	NA	acn-BAC0003,acrA-BAC0005,acrB-BAC0006,acrD/yffA-BAC0008,acrE/envC-BAC0009,acrF/envD-BAC0010,actP/yjcG-BAC0564,arsA-BAC0571,arsB-BAC0576,arsC-BAC0582,arsC-BAC0583,arsD-BAC0587,arsP-BAC0036,arsR-BAC0594,asr-BAC0038,baeS-BAC0040,bfrA-BAC0048,bhsA/ycfR/comC-BAC0049,comR/ycfQ-BAC0076,copA-BAC0725,copS-BAC0752,corA-BAC0086,corB-BAC0643,corD-BAC0644,cpxA-BAC0532,cueO-BAC0103,cueR/ybbI-BAC0105,cusA/ybdE-…	NA	NA	NA	NA	NA	NA	NA	NA	NA	NA	2018-08-15	healthcare associated 31-365d	K84048	F	64	PRJNA604975	SAMN18263245
OX-BSI-22_2	07aafd66-5d8d-48ef-8edf-843728d1fbf9	07aafd66-5d8d-48ef-8edf-843728d1fbf9_2	Plasmid	BSI	125263	49.32	ecoli	95	30	3	2	100	NA	IS2,IS629,ISEc32	IncFIB(AP001918)_1	sitA-BAC0349,sitB-BAC0350,sitC-BAC0351,sitD-BAC0352,smdB-BAC0354,tupC-BAC0607	MOBF	MPF_F	MOBF	conjugative	PTU-FE	III	1	NA	NA	NA	2009-12-07	healthcare associated 0-30d	K84078	M	72	PRJNA604975	SAMN18263244
OX-BSI-22_1	07aafd66-5d8d-48ef-8edf-843728d1fbf9	07aafd66-5d8d-48ef-8edf-843728d1fbf9_chromo	Chromosome	BSI	5006034	50.54	ecoli	95	NA	NA	NA	NA	NA	IS100kyp,IS1203,IS1397,IS200C,IS621,ISEc20,ISEc30,ISEc38,ISEc40,ISEc45,ISEc48,ISEc8	NA	acn-BAC0003,acrA-BAC0005,acrD/yffA-BAC0008,acrE/envC-BAC0009,acrF/envD-BAC0010,actP/yjcG-BAC0564,arsC-BAC0582,arsC-BAC0583,asr-BAC0038,baeS-BAC0040,bfrA-BAC0048,bhsA/ycfR/comC-BAC0049,comR/ycfQ-BAC0076,copA-BAC0725,corA-BAC0086,corB-BAC0643,corD-BAC0644,cpxA-BAC0532,cueO-BAC0103,cueR/ybbI-BAC0105,cusA/ybdE-BAC0107,cusB-BAC0108,cusC/ylcB-BAC0109,cusF/cusX-BAC0110,cusR/ylcA-BAC0111,cusS-BAC0112,cut…	NA	NA	NA	NA	NA	NA	NA	NA	NA	NA	2009-12-07	healthcare associated 0-30d	K84078	M	72	PRJNA604975	SAMN18263244
OX-BSI-23_1	085f3158-e8a9-46a7-be3f-bbac2a357e78	085f3158-e8a9-46a7-be3f-bbac2a357e78_chromo	Chromosome	BSI	5217991	50.25	ecoli	80	NA	NA	NA	NA	blaEC-5	IS100kyp,IS1397,IS621,IS630,IS682,IS911,ISEc16,ISEc20,ISEc31,ISEc42	NA	acn-BAC0003,acrA-BAC0005,acrD/yffA-BAC0008,acrE/envC-BAC0009,acrF/envD-BAC0010,actP/yjcG-BAC0564,arsC-BAC0582,arsC-BAC0583,asr-BAC0038,baeS-BAC0040,bfrA-BAC0048,bhsA/ycfR/comC-BAC0049,comR/ycfQ-BAC0076,copA-BAC0725,corA-BAC0086,corB-BAC0643,corD-BAC0644,cpxA-BAC0532,cueO-BAC0103,cueR/ybbI-BAC0105,cusA/ybdE-BAC0107,cusB-BAC0108,cusC/ylcB-BAC0109,cusF/cusX-BAC0110,cusR/ylcA-BAC0111,cusS-BAC0112,cut…	NA	NA	NA	NA	NA	NA	NA	NA	NA	NA	2009-04-16	healthcare associated 0-30d	K84033	M	86	PRJNA604975	SAMN18263240
OX-BSI-23_2	085f3158-e8a9-46a7-be3f-bbac2a357e78	085f3158-e8a9-46a7-be3f-bbac2a357e78_2	Plasmid	BSI	66137	52.08	ecoli	80	NA	NA	12	42	blaTEM-1	Tn3	IncFII_1	NA	MOBF	MPF_F	MOBF	conjugative	PTU-FE	III	1	NA	NA	NA	2009-04-16	healthcare associated 0-30d	K84033	M	86	PRJNA604975	SAMN18263240
OX-BSI-24_3	08950ca2-5b0b-4068-8305-33c608a6cacc	08950ca2-5b0b-4068-8305-33c608a6cacc_3	Plasmid	BSI	43516	40.35	ecoli	73	NA	NA	NA	NA	NA	NA	NA	triA-BAC0396,triC-BAC0398	MOBP	MPF_T	-	conjugative	PTU-E80	IV	0.8333	NA	NA	NA	2018-11-23	community	K84037	F	92	PRJNA604975	SAMN18263239
OX-BSI-24_1	08950ca2-5b0b-4068-8305-33c608a6cacc	08950ca2-5b0b-4068-8305-33c608a6cacc_chromo	Chromosome	BSI	5210265	50.55	ecoli	73	NA	NA	NA	NA	blaEC-5	IS100kyp,IS200C,IS30,IS630,ISEc13,ISEc16,ISEc20,ISEc39,ISEc41,ISEc42,ISEc48	NA	acn-BAC0003,acrA-BAC0005,acrB-BAC0006,acrD/yffA-BAC0008,acrE/envC-BAC0009,acrF/envD-BAC0010,actP/yjcG-BAC0564,adeE-BAC0013,arsC-BAC0582,arsC-BAC0583,asr-BAC0038,baeS-BAC0040,bfrA-BAC0048,bhsA/ycfR/comC-BAC0049,comR/ycfQ-BAC0076,copA-BAC0725,corA-BAC0086,corB-BAC0643,corD-BAC0644,cpxA-BAC0532,cueO-BAC0103,cueR/ybbI-BAC0105,cusA/ybdE-BAC0107,cusB-BAC0108,cusC/ylcB-BAC0109,cusF/cusX-BAC0110,cusR/ylc…	NA	NA	NA	NA	NA	NA	NA	NA	NA	NA	2018-11-23	community	K84037	F	92	PRJNA604975	SAMN18263239
OX-BSI-24_11	08950ca2-5b0b-4068-8305-33c608a6cacc	08950ca2-5b0b-4068-8305-33c608a6cacc_11	Plasmid	BSI	3904	51.1	ecoli	73	NA	NA	NA	NA	NA	NA	Col156_1	NA	MOBQ,MOBQ	-	-	mobilizable	PTU-E19	III	1	NA	NA	NA	2018-11-23	community	K84037	F	92	PRJNA604975	SAMN18263239
OX-BSI-24_4	08950ca2-5b0b-4068-8305-33c608a6cacc	08950ca2-5b0b-4068-8305-33c608a6cacc_4	Plasmid	BSI	11281	42.24	ecoli	73	NA	NA	31	20	NA	NA	NA	NA	MOBQ	-	-	mobilizable	-	-	1	NA	NA	NA	2018-11-23	community	K84037	F	92	PRJNA604975	SAMN18263239
OX-BSI-24_10	08950ca2-5b0b-4068-8305-33c608a6cacc	08950ca2-5b0b-4068-8305-33c608a6cacc_10	Plasmid	BSI	4073	51.46	ecoli	73	NA	NA	47	13	NA	NA	NA	NA	MOBQ	-	MOBQ,MOBQ	mobilizable	PTU-E10	III	1	NA	NA	NA	2018-11-23	community	K84037	F	92	PRJNA604975	SAMN18263239
OX-BSI-24_6	08950ca2-5b0b-4068-8305-33c608a6cacc	08950ca2-5b0b-4068-8305-33c608a6cacc_6	Plasmid	BSI	5606	46.91	ecoli	73	NA	NA	11	43	NA	NA	ColRNAI_1	NA	MOBP,MOBP	-	MOBP	mobilizable	PTU-E1	III	0.9878	NA	NA	NA	2018-11-23	community	K84037	F	92	PRJNA604975	SAMN18263239
OX-BSI-24_9	08950ca2-5b0b-4068-8305-33c608a6cacc	08950ca2-5b0b-4068-8305-33c608a6cacc_9	Plasmid	BSI	4091	49.6	ecoli	73	NA	NA	85	7	NA	NA	Col8282_1	NA	MOBQ	-	MOBQ,MOBQ	mobilizable	PTU-E10	III	1	NA	NA	NA	2018-11-23	community	K84037	F	92	PRJNA604975	SAMN18263239
OX-BSI-24_5	08950ca2-5b0b-4068-8305-33c608a6cacc	08950ca2-5b0b-4068-8305-33c608a6cacc_5	Plasmid	BSI	6790	51.99	ecoli	73	NA	NA	38	15	aph(3'')-Ib,aph(6)-Id,dfrA14,sul2	NA	ColRNAI_1	NA	-	-	MOBP	mobilizable	PTU-E52	III	0.5	NA	NA	NA	2018-11-23	community	K84037	F	92	PRJNA604975	SAMN18263239
OX-BSI-24_2	08950ca2-5b0b-4068-8305-33c608a6cacc	08950ca2-5b0b-4068-8305-33c608a6cacc_2	Plasmid	BSI	91355	52.2	ecoli	73	NA	NA	15	38	aph(3'')-Ib,aph(6)-Id,blaTEM-1,sul2	ISCro1,ISKpn26	IncFIB(AP001918)_1,IncFIC(FII)_1	cpxR-BAC0533	MOBF,MOBP	MPF_F	MOBF	conjugative	PTU-FE	III	1	NA	NA	NA	2018-11-23	community	K84037	F	92	PRJNA604975	SAMN18263239
OX-BSI-24_8	08950ca2-5b0b-4068-8305-33c608a6cacc	08950ca2-5b0b-4068-8305-33c608a6cacc_8	Plasmid	BSI	4150	49.61	ecoli	73	NA	NA	NA	NA	NA	NA	Col156_1	NA	MOBQ	-	-	mobilizable	PTU-E19	III	1	NA	NA	NA	2018-11-23	community	K84037	F	92	PRJNA604975	SAMN18263239
OX-BSI-24_7	08950ca2-5b0b-4068-8305-33c608a6cacc	08950ca2-5b0b-4068-8305-33c608a6cacc_7	Plasmid	BSI	5167	47.2	ecoli	73	NA	NA	4	69	NA	NA	Col156_1	NA	MOBQ	-	-	mobilizable	PTU-E7	III	1	NA	NA	NA	2018-11-23	community	K84037	F	92	PRJNA604975	SAMN18263239
OX-BSI-25_1	08aa8736-ab5f-42d1-a980-15ad0e3c872c	08aa8736-ab5f-42d1-a980-15ad0e3c872c_chromo	Chromosome	BSI	5246953	50.66	ecoli	95	NA	NA	NA	NA	NA	IS102,IS1203,IS1397,IS1F,IS200C,IS30,IS621,ISEc23,ISEc30,ISEc38,ISEc48	NA	acn-BAC0003,acrA-BAC0005,acrD/yffA-BAC0008,acrE/envC-BAC0009,acrF/envD-BAC0010,actP/yjcG-BAC0564,arsC-BAC0582,arsC-BAC0583,asr-BAC0038,baeS-BAC0040,bfrA-BAC0048,bhsA/ycfR/comC-BAC0049,comR/ycfQ-BAC0076,copA-BAC0725,corA-BAC0086,corB-BAC0643,corD-BAC0644,cpxA-BAC0532,cueO-BAC0103,cueR/ybbI-BAC0105,cusA/ybdE-BAC0107,cusB-BAC0108,cusC/ylcB-BAC0109,cusF/cusX-BAC0110,cusR/ylcA-BAC0111,cusS-BAC0112,cut…	NA	NA	NA	NA	NA	NA	NA	NA	NA	NA	2018-03-16	healthcare associated 31-365d	K84007	M	69	PRJNA604975	SAMN18263235
OX-BSI-25_3	08aa8736-ab5f-42d1-a980-15ad0e3c872c	08aa8736-ab5f-42d1-a980-15ad0e3c872c_3	Plasmid	BSI	5720	40.05	ecoli	95	NA	NA	NA	NA	NA	NA	NA	NA	-	MPF_T	-	non-mobilizable	-	-	1	NA	NA	NA	2018-03-16	healthcare associated 31-365d	K84007	M	69	PRJNA604975	SAMN18263235
OX-BSI-25_4	08aa8736-ab5f-42d1-a980-15ad0e3c872c	08aa8736-ab5f-42d1-a980-15ad0e3c872c_4	Plasmid	BSI	1506	50.27	ecoli	95	NA	NA	6	62	NA	NA	Col(MG828)_1	NA	-	-	-	non-mobilizable	PTU-E9	VI	1	NA	NA	NA	2018-03-16	healthcare associated 31-365d	K84007	M	69	PRJNA604975	SAMN18263235
OX-BSI-25_2	08aa8736-ab5f-42d1-a980-15ad0e3c872c	08aa8736-ab5f-42d1-a980-15ad0e3c872c_2	Plasmid	BSI	198302	49.39	ecoli	95	NA	NA	2	100	NA	IS100kyp,IS30,ISCro3,ISSen4	IncFIB(AP001918)_1,IncFIC(FII)_1	fecD-BAC0163,fecE-BAC0164,sitA-BAC0349,sitB-BAC0350,sitC-BAC0351,sitD-BAC0352,tupC-BAC0607	MOBF	MPF_F	MOBF	conjugative	PTU-FE	III	1	NA	NA	NA	2018-03-16	healthcare associated 31-365d	K84007	M	69	PRJNA604975	SAMN18263235
OX-BSI-26_2	08ddc6b8-0f1e-4c7b-b600-36eb2281b06b	08ddc6b8-0f1e-4c7b-b600-36eb2281b06b_2	Plasmid	BSI	145473	52.81	ecoli	69	226	2	5	68	aph(3'')-Ib,aph(6)-Id,blaTEM-1,dfrA14,mph(A),sul2,tet(B)	IS1A,IS1R,IS1X2,IS5,IS5075,ISKpn26,ISVsa5	IncFIA_1,IncFIB(AP001918)_1,IncFII(pRSB107)_1_pRSB107	blt-BAC0050,iclR-BAC0196,merA-BAC0652,merC-BAC0664,merD-BAC0666,merE-BAC0670,merP-BAC0678,merR-BAC0232,merT-BAC0693,wtpC-BAC0604	MOBF,MOBP	MPF_F	MOBF	conjugative	PTU-FE	III	0.9405	NA	NA	NA	2014-08-20	healthcare associated 0-30d	K84007	M	40	PRJNA604975	NA
OX-BSI-26_3	08ddc6b8-0f1e-4c7b-b600-36eb2281b06b	08ddc6b8-0f1e-4c7b-b600-36eb2281b06b_3	Plasmid	BSI	5167	47.55	ecoli	69	21	3	4	69	NA	NA	Col156_1	NA	MOBQ	-	-	mobilizable	PTU-E7	III	1	NA	NA	NA	2014-08-20	healthcare associated 0-30d	K84007	M	40	PRJNA604975	NA
OX-BSI-26_4	08ddc6b8-0f1e-4c7b-b600-36eb2281b06b	08ddc6b8-0f1e-4c7b-b600-36eb2281b06b_4	Plasmid	BSI	4072	49.8	ecoli	69	NA	NA	9	51	NA	NA	Col8282_1	NA	MOBQ	-	MOBQ,MOBQ	mobilizable	PTU-E10	III	1	NA	NA	NA	2014-08-20	healthcare associated 0-30d	K84007	M	40	PRJNA604975	NA
OX-BSI-26_1	08ddc6b8-0f1e-4c7b-b600-36eb2281b06b	08ddc6b8-0f1e-4c7b-b600-36eb2281b06b_chromo	Chromosome	BSI	5096405	50.71	ecoli	69	NA	NA	NA	NA	NA	IS1B,IS1F,IS5,IS911,ISEc31,ISEc46,ISEc8	NA	acn-BAC0003,acrA-BAC0005,acrB-BAC0006,acrD/yffA-BAC0008,acrE/envC-BAC0009,acrF/envD-BAC0010,actP/yjcG-BAC0564,arsA-BAC0571,arsB-BAC0576,arsC-BAC0582,arsC-BAC0583,arsD-BAC0587,arsP-BAC0036,arsR-BAC0594,asr-BAC0038,baeS-BAC0040,bfrA-BAC0048,bhsA/ycfR/comC-BAC0049,comR/ycfQ-BAC0076,copA-BAC0725,copS-BAC0752,corA-BAC0086,corB-BAC0643,corD-BAC0644,cpxA-BAC0532,cueO-BAC0103,cueR/ybbI-BAC0105,cusA/ybdE-…	NA	NA	NA	NA	NA	NA	NA	NA	NA	NA	2014-08-20	healthcare associated 0-30d	K84007	M	40	PRJNA604975	NA
OX-BSI-27_2	090e1bce-7233-4ce2-b357-21c7b35454ce	090e1bce-7233-4ce2-b357-21c7b35454ce_2	Plasmid	BSI	188935	49.9	ecoli	140	NA	NA	2	100	NA	IS100kyp,IS1X4,IS30	IncFIB(AP001918)_1,IncFIC(FII)_1	fecD-BAC0163,fecE-BAC0164,tupC-BAC0607	MOBF,MOBP	MPF_F	MOBF	conjugative	PTU-FE	III	1	NA	NA	NA	2018-05-03	nosocomial	Y00058	F	62	PRJNA604975	SAMN18263231
OX-BSI-27_1	090e1bce-7233-4ce2-b357-21c7b35454ce	090e1bce-7233-4ce2-b357-21c7b35454ce_chromo	Chromosome	BSI	5116061	50.68	ecoli	140	NA	NA	NA	NA	NA	IS1397,IS2,IS200C,IS621,ISEc23,ISEc38,ISEc40	NA	acn-BAC0003,acrA-BAC0005,acrD/yffA-BAC0008,acrE/envC-BAC0009,acrF/envD-BAC0010,actP/yjcG-BAC0564,arsC-BAC0582,arsC-BAC0583,asr-BAC0038,baeS-BAC0040,bfrA-BAC0048,bhsA/ycfR/comC-BAC0049,comR/ycfQ-BAC0076,copA-BAC0725,corA-BAC0086,corB-BAC0643,corD-BAC0644,cpxA-BAC0532,cueO-BAC0103,cueR/ybbI-BAC0105,cusA/ybdE-BAC0107,cusB-BAC0108,cusC/ylcB-BAC0109,cusF/cusX-BAC0110,cusR/ylcA-BAC0111,cusS-BAC0112,cut…	NA	NA	NA	NA	NA	NA	NA	NA	NA	NA	2018-05-03	nosocomial	Y00058	F	62	PRJNA604975	SAMN18263231
OX-BSI-28_1	0975de62-d2e9-43f7-9d44-24309830c6b7	0975de62-d2e9-43f7-9d44-24309830c6b7_chromo	Chromosome	BSI	4891609	50.53	ecoli	108	NA	NA	NA	NA	NA	IS609,ISEc46	NA	acn-BAC0003,acrA-BAC0005,acrD/yffA-BAC0008,acrE/envC-BAC0009,acrF/envD-BAC0010,actP/yjcG-BAC0564,arsB-BAC0576,arsC-BAC0582,arsC-BAC0583,arsP-BAC0036,arsR-BAC0594,asr-BAC0038,baeS-BAC0040,bfrA-BAC0048,bhsA/ycfR/comC-BAC0049,comR/ycfQ-BAC0076,copA-BAC0725,copS-BAC0752,corA-BAC0086,corB-BAC0643,corC-BAC0088,corD-BAC0644,cpxA-BAC0532,cueO-BAC0103,cueR/ybbI-BAC0105,cusA/ybdE-BAC0107,cusB-BAC0108,cusC/…	NA	NA	NA	NA	NA	NA	NA	NA	NA	NA	2018-04-25	healthcare associated 31-365d	K84052	M	75	PRJNA604975	SAMN18263227
OX-BSI-29_2	09dff8c2-db9b-4089-82e9-64980b12faec	09dff8c2-db9b-4089-82e9-64980b12faec_2	Plasmid	BSI	114236	51.03	ecoli	73	NA	NA	1	123	NA	IS100kyp,IS21,IS26,ISEc10,ISEc53	Col156_1,IncFIB(AP001918)_1,IncFII(29)_1_pUTI89	NA	MOBF,MOBP	MPF_F	MOBF	conjugative	PTU-FE	III	0.9941	NA	NA	NA	2015-07-10	community	K84072	M	18	PRJNA604975	NA
OX-BSI-29_1	09dff8c2-db9b-4089-82e9-64980b12faec	09dff8c2-db9b-4089-82e9-64980b12faec_chromo	Chromosome	BSI	5167149	50.58	ecoli	73	NA	NA	NA	NA	blaEC-5	IS1203,IS1F,IS200C,IS30,IS630,ISEc13,ISEc16,ISEc20,ISEc39,ISEc41,ISEc42,ISEc52,ISEc8,ISSd1	NA	acn-BAC0003,acrA-BAC0005,acrD/yffA-BAC0008,acrE/envC-BAC0009,acrF/envD-BAC0010,actP/yjcG-BAC0564,arsC-BAC0582,arsC-BAC0583,asr-BAC0038,baeS-BAC0040,bfrA-BAC0048,bhsA/ycfR/comC-BAC0049,comR/ycfQ-BAC0076,copA-BAC0725,corA-BAC0086,corB-BAC0643,corD-BAC0644,cpxA-BAC0532,cueO-BAC0103,cueR/ybbI-BAC0105,cusA/ybdE-BAC0107,cusB-BAC0108,cusC/ylcB-BAC0109,cusF/cusX-BAC0110,cusR/ylcA-BAC0111,cusS-BAC0112,cut…	NA	NA	NA	NA	NA	NA	NA	NA	NA	NA	2015-07-10	community	K84072	M	18	PRJNA604975	NA
OX-BSI-30_1	09eef1cc-c9f9-4d33-a1c3-247c4a8eebba	09eef1cc-c9f9-4d33-a1c3-247c4a8eebba_chromo	Chromosome	BSI	5104230	50.49	ecoli	73	NA	NA	NA	NA	blaEC-5	IS100kyp,IS1203,IS200C,IS30,IS629,IS630,ISEc10,ISEc13,ISEc16,ISEc20,ISEc39,ISEc41,ISEc42,ISEc48	NA	acn-BAC0003,acrA-BAC0005,acrD/yffA-BAC0008,acrE/envC-BAC0009,acrF/envD-BAC0010,actP/yjcG-BAC0564,arsC-BAC0582,arsC-BAC0583,asr-BAC0038,baeS-BAC0040,bfrA-BAC0048,bhsA/ycfR/comC-BAC0049,comR/ycfQ-BAC0076,copA-BAC0725,corA-BAC0086,corB-BAC0643,corD-BAC0644,cpxA-BAC0532,cueO-BAC0103,cueR/ybbI-BAC0105,cusA/ybdE-BAC0107,cusB-BAC0108,cusC/ylcB-BAC0109,cusF/cusX-BAC0110,cusR/ylcA-BAC0111,cusS-BAC0112,cut…	NA	NA	NA	NA	NA	NA	NA	NA	NA	NA	2009-09-10	nosocomial	K84039	F	84	PRJNA604975	SAMN18263222
OX-BSI-30_3	09eef1cc-c9f9-4d33-a1c3-247c4a8eebba	09eef1cc-c9f9-4d33-a1c3-247c4a8eebba_3	Plasmid	BSI	6675	44.33	ecoli	73	NA	NA	177	3	NA	NA	NA	NA	MOBQ	-	MOBQ,MOBQ	mobilizable	-	-	1	NA	NA	NA	2009-09-10	nosocomial	K84039	F	84	PRJNA604975	SAMN18263222
OX-BSI-30_2	09eef1cc-c9f9-4d33-a1c3-247c4a8eebba	09eef1cc-c9f9-4d33-a1c3-247c4a8eebba_2	Plasmid	BSI	114231	51.02	ecoli	73	NA	NA	1	123	NA	IS100kyp,IS21,IS26,ISEc10,ISEc53	Col156_1,IncFIB(AP001918)_1,IncFII(29)_1_pUTI89	NA	MOBF,MOBP	MPF_F	MOBF	conjugative	PTU-FE	III	1	NA	NA	NA	2009-09-10	nosocomial	K84039	F	84	PRJNA604975	SAMN18263222
OX-BSI-31_1	0aea426a-44b4-4a95-9b84-02f910e172a5	0aea426a-44b4-4a95-9b84-02f910e172a5_chromo	Chromosome	BSI	5109951	50.7	ecoli	69	NA	NA	NA	NA	NA	IS1203,IS1351,IS1F,IS2,IS911,ISEc22,ISEc38,ISEc46,ISEc8	NA	acn-BAC0003,acrA-BAC0005,acrB-BAC0006,acrD/yffA-BAC0008,acrE/envC-BAC0009,acrF/envD-BAC0010,actP/yjcG-BAC0564,arsA-BAC0571,arsB-BAC0576,arsC-BAC0582,arsC-BAC0583,arsD-BAC0587,arsP-BAC0036,arsR-BAC0594,asr-BAC0038,baeS-BAC0040,bfrA-BAC0048,bhsA/ycfR/comC-BAC0049,comR/ycfQ-BAC0076,copA-BAC0725,copS-BAC0752,corA-BAC0086,corB-BAC0643,corD-BAC0644,cpxA-BAC0532,cueO-BAC0103,cueR/ybbI-BAC0105,cusA/ybdE-…	NA	NA	NA	NA	NA	NA	NA	NA	NA	NA	2018-04-20	healthcare associated 0-30d	K84044	M	0	PRJNA604975	SAMN18263218
OX-BSI-31_2	0aea426a-44b4-4a95-9b84-02f910e172a5	0aea426a-44b4-4a95-9b84-02f910e172a5_2	Plasmid	BSI	5162	47.48	ecoli	69	NA	NA	4	69	NA	NA	Col156_1	NA	MOBQ	-	-	mobilizable	PTU-E7	III	1	NA	NA	NA	2018-04-20	healthcare associated 0-30d	K84044	M	0	PRJNA604975	SAMN18263218
OX-BSI-31_3	0aea426a-44b4-4a95-9b84-02f910e172a5	0aea426a-44b4-4a95-9b84-02f910e172a5_3	Plasmid	BSI	4060	49.33	ecoli	69	NA	NA	21	29	NA	NA	Col8282_1	NA	MOBQ	-	MOBQ,MOBQ	mobilizable	PTU-E10	III	1	NA	NA	NA	2018-04-20	healthcare associated 0-30d	K84044	M	0	PRJNA604975	SAMN18263218
OX-BSI-32_1	0afe7285-a7cf-4b3d-b875-bca39c519b30	0afe7285-a7cf-4b3d-b875-bca39c519b30_chromo	Chromosome	BSI	4888861	50.8	ecoli	173	NA	NA	NA	NA	NA	IS100kyp,IS1F,IS1H,IS3,IS30,ISEc26	NA	acn-BAC0003,acrA-BAC0005,acrB-BAC0006,acrD/yffA-BAC0008,acrE/envC-BAC0009,acrF/envD-BAC0010,actP/yjcG-BAC0564,arsB-BAC0576,arsC-BAC0582,arsP-BAC0036,arsR-BAC0594,asr-BAC0038,baeS-BAC0040,bfrA-BAC0048,bhsA/ycfR/comC-BAC0049,comR/ycfQ-BAC0076,copA-BAC0725,copS-BAC0752,corA-BAC0086,corB-BAC0643,corD-BAC0644,cpxA-BAC0532,cueO-BAC0103,cueR/ybbI-BAC0105,cusA/ybdE-BAC0107,cusB-BAC0108,cusC/ylcB-BAC0109,…	NA	NA	NA	NA	NA	NA	NA	NA	NA	NA	2009-02-04	nosocomial	K84082	M	86	PRJNA604975	SAMN18263216
OX-BSI-33_2	0b2279f1-2c90-4e22-bd3e-a1751ce9c18a	0b2279f1-2c90-4e22-bd3e-a1751ce9c18a_2	Plasmid	BSI	137578	49.37	ecoli	95	NA	NA	2	100	blaTEM-1	IS2,IS629,ISEc32,ISEc52,Tn3	IncFIB(AP001918)_1	sitA-BAC0349,sitB-BAC0350,sitC-BAC0351,sitD-BAC0352,smdB-BAC0354,tupC-BAC0607	MOBF	MPF_F	MOBF	conjugative	PTU-FE	III	1	NA	NA	NA	2018-01-18	community	K84024	F	68	PRJNA604975	SAMN18263215
OX-BSI-33_3	0b2279f1-2c90-4e22-bd3e-a1751ce9c18a	0b2279f1-2c90-4e22-bd3e-a1751ce9c18a_3	Plasmid	BSI	1552	51.87	ecoli	95	44	7	6	62	NA	NA	Col(MG828)_1	NA	-	-	MOB_unknown	mobilizable	PTU-E9	VI	1	NA	NA	NA	2018-01-18	community	K84024	F	68	PRJNA604975	SAMN18263215
OX-BSI-33_1	0b2279f1-2c90-4e22-bd3e-a1751ce9c18a	0b2279f1-2c90-4e22-bd3e-a1751ce9c18a_chromo	Chromosome	BSI	4911631	50.53	ecoli	95	NA	NA	NA	NA	NA	IS1203,IS1397,IS1F,IS200C,IS621,IS629,ISEc12,ISEc30,ISEc38,ISEc48,ISEc8,ISSd1	NA	acn-BAC0003,acrA-BAC0005,acrB-BAC0006,acrD/yffA-BAC0008,acrE/envC-BAC0009,acrF/envD-BAC0010,actP/yjcG-BAC0564,arsC-BAC0582,arsC-BAC0583,asr-BAC0038,baeS-BAC0040,bfrA-BAC0048,bhsA/ycfR/comC-BAC0049,comR/ycfQ-BAC0076,copA-BAC0725,corA-BAC0086,corB-BAC0643,corD-BAC0644,cpxA-BAC0532,cueO-BAC0103,cueR/ybbI-BAC0105,cusA/ybdE-BAC0107,cusB-BAC0108,cusC/ylcB-BAC0109,cusF/cusX-BAC0110,cusR/ylcA-BAC0111,cus…	NA	NA	NA	NA	NA	NA	NA	NA	NA	NA	2018-01-18	community	K84024	F	68	PRJNA604975	SAMN18263215
OX-BSI-34_2	0b23983d-2e95-43f9-8ece-ed233333d50b	0b23983d-2e95-43f9-8ece-ed233333d50b_2	Plasmid	BSI	143993	51.93	ecoli	131	NA	NA	1	123	aac(3)-IId,aadA5,aph(3'')-Ib,aph(6)-Id,blaTEM-1,dfrA17,mph(A),qacEdelta1,sul1,sul2,tet(A)	IS100kyp,IS1R,IS21,IS26,IS6100,ISCfr1,ISEc23,ISEc53,ISVsa5	Col156_1,IncFIB(AP001918)_1,IncFII_1	blt-BAC0050,qacEdelta1-BAC0323	MOBF,MOBP	MPF_F	MOBF	conjugative	PTU-FE	III	0.9941	NA	NA	NA	2018-02-27	community	K84032	M	74	PRJNA604975	SAMN18263214
OX-BSI-34_3	0b23983d-2e95-43f9-8ece-ed233333d50b	0b23983d-2e95-43f9-8ece-ed233333d50b_3	Plasmid	BSI	1552	51.8	ecoli	131	NA	NA	6	62	NA	NA	Col(MG828)_1	NA	-	-	MOB_unknown	mobilizable	PTU-E9	VI	1	NA	NA	NA	2018-02-27	community	K84032	M	74	PRJNA604975	SAMN18263214
OX-BSI-34_1	0b23983d-2e95-43f9-8ece-ed233333d50b	0b23983d-2e95-43f9-8ece-ed233333d50b_chromo	Chromosome	BSI	5187204	50.78	ecoli	131	NA	NA	NA	NA	aac(6')-Ib-cr5,blaCTX-M-15,blaOXA-1	IS100kyp,IS1F,IS1R,IS2,IS30,IS609,ISEc1,ISEc10,ISEc20,ISEc24,ISEc38,ISEc53,ISEc8,ISEc9,ISSd1	NA	acn-BAC0003,acrA-BAC0005,acrB-BAC0006,acrD/yffA-BAC0008,acrE/envC-BAC0009,acrF/envD-BAC0010,actP/yjcG-BAC0564,adeE-BAC0013,arsC-BAC0582,arsC-BAC0583,asr-BAC0038,baeS-BAC0040,bfrA-BAC0048,bhsA/ycfR/comC-BAC0049,comR/ycfQ-BAC0076,copA-BAC0725,corA-BAC0086,corB-BAC0643,corD-BAC0644,cpxA-BAC0532,cueO-BAC0103,cueR/ybbI-BAC0105,cusA/ybdE-BAC0107,cusB-BAC0108,cusC/ylcB-BAC0109,cusF/cusX-BAC0110,cusR/ylc…	NA	NA	NA	NA	NA	NA	NA	NA	NA	NA	2018-02-27	community	K84032	M	74	PRJNA604975	SAMN18263214
OX-BSI-35_1	0b76c650-85df-4f1a-b8d6-3d7a12cee6e3	0b76c650-85df-4f1a-b8d6-3d7a12cee6e3_chromo	Chromosome	BSI	5000002	50.67	ecoli	131	NA	NA	NA	NA	NA	IS100kyp,IS200C,IS609,ISEc1,ISEc12,ISEc20,ISEc24,ISEc38,ISSen4	NA	acn-BAC0003,acrA-BAC0005,acrD/yffA-BAC0008,acrE/envC-BAC0009,acrF/envD-BAC0010,actP/yjcG-BAC0564,arsC-BAC0582,arsC-BAC0583,asr-BAC0038,baeS-BAC0040,bfrA-BAC0048,bhsA/ycfR/comC-BAC0049,comR/ycfQ-BAC0076,copA-BAC0725,corA-BAC0086,corB-BAC0643,corD-BAC0644,cpxA-BAC0532,cueO-BAC0103,cueR/ybbI-BAC0105,cusA/ybdE-BAC0107,cusB-BAC0108,cusC/ylcB-BAC0109,cusF/cusX-BAC0110,cusR/ylcA-BAC0111,cusS-BAC0112,cut…	NA	NA	NA	NA	NA	NA	NA	NA	NA	NA	2012-06-14	nosocomial	K84033	M	69	PRJNA604975	SAMN18263212
OX-BSI-35_2	0b76c650-85df-4f1a-b8d6-3d7a12cee6e3	0b76c650-85df-4f1a-b8d6-3d7a12cee6e3_2	Plasmid	BSI	149682	51.06	ecoli	131	NA	NA	2	100	aph(3'')-Ib,aph(6)-Id,blaTEM-1,dfrA5,sul2	IS2,IS629,ISEc12,ISEc32	IncFIB(AP001918)_1,IncFII_1	merA-BAC0652,merC-BAC0664,merD-BAC0666,merE-BAC0670,merP-BAC0678,merR-BAC0232,merT-BAC0693,sitA-BAC0349,sitB-BAC0350,sitC-BAC0351,sitD-BAC0352,smdB-BAC0354,tupC-BAC0607	MOBF	MPF_F	MOBF	conjugative	PTU-?	III	0.6905	NA	NA	NA	2012-06-14	nosocomial	K84033	M	69	PRJNA604975	SAMN18263212
OX-BSI-36_2	0c166d5c-fee3-4887-ab09-0e6d4e31c355	0c166d5c-fee3-4887-ab09-0e6d4e31c355_2	Plasmid	BSI	145043	51.62	ecoli	1858	NA	NA	1	123	aadA5,aph(3'')-Ib,aph(6)-Id,blaTEM-1,catA1,dfrA17,qacEdelta1,sul1,sul2,tet(B)	IS100kyp,IS21,ISEc53,ISVsa5	Col156_1,IncFIB(AP001918)_1,IncFII(29)_1_pUTI89	blt-BAC0050,merA-BAC0652,merC-BAC0664,merD-BAC0666,merE-BAC0670,merP-BAC0678,merR-BAC0232,merT-BAC0693,qacEdelta1-BAC0323	MOBF,MOBP	MPF_F	MOBF	conjugative	PTU-FE	III	0.9231	NA	NA	NA	2012-07-31	nosocomial	K82028	M	59	PRJNA604975	SAMN18263209
OX-BSI-36_1	0c166d5c-fee3-4887-ab09-0e6d4e31c355	0c166d5c-fee3-4887-ab09-0e6d4e31c355_chromo	Chromosome	BSI	4772759	50.64	ecoli	1858	NA	NA	NA	NA	blaEC-5	IS200C,IS621,IS630,ISEc21,ISEc39,ISEc42,ISEc47,ISSen4	NA	acn-BAC0003,acrA-BAC0005,acrD/yffA-BAC0008,acrE/envC-BAC0009,acrF/envD-BAC0010,actP/yjcG-BAC0564,arsC-BAC0582,arsC-BAC0583,asr-BAC0038,baeS-BAC0040,bfrA-BAC0048,bhsA/ycfR/comC-BAC0049,comR/ycfQ-BAC0076,copA-BAC0725,corA-BAC0086,corB-BAC0643,corD-BAC0644,cpxA-BAC0532,cueO-BAC0103,cueR/ybbI-BAC0105,cusA/ybdE-BAC0107,cusB-BAC0108,cusC/ylcB-BAC0109,cusF/cusX-BAC0110,cusR/ylcA-BAC0111,cusS-BAC0112,cut…	NA	NA	NA	NA	NA	NA	NA	NA	NA	NA	2012-07-31	nosocomial	K82028	M	59	PRJNA604975	SAMN18263209
OX-BSI-37_2	0c778e58-1160-4370-a9c1-d5883cfcf632	0c778e58-1160-4370-a9c1-d5883cfcf632_2	Plasmid	BSI	5163	47.47	ecoli	69	7	5	4	69	NA	NA	Col156_1	NA	MOBQ	-	-	mobilizable	PTU-E7	III	1	NA	NA	NA	2018-11-18	community	K84017	F	84	PRJNA604975	SAMN18263204
OX-BSI-37_1	0c778e58-1160-4370-a9c1-d5883cfcf632	0c778e58-1160-4370-a9c1-d5883cfcf632_chromo	Chromosome	BSI	5120729	50.7	ecoli	69	NA	NA	NA	NA	NA	IS1203,IS1351,IS1F,IS911,ISEc22,ISEc38,ISEc43,ISEc45,ISEc46,ISEc8	NA	acn-BAC0003,acrA-BAC0005,acrB-BAC0006,acrD/yffA-BAC0008,acrE/envC-BAC0009,acrF/envD-BAC0010,actP/yjcG-BAC0564,arsA-BAC0571,arsB-BAC0576,arsC-BAC0582,arsC-BAC0583,arsD-BAC0587,arsP-BAC0036,arsR-BAC0594,asr-BAC0038,baeS-BAC0040,bfrA-BAC0048,bhsA/ycfR/comC-BAC0049,comR/ycfQ-BAC0076,copA-BAC0725,copS-BAC0752,corA-BAC0086,corB-BAC0643,corD-BAC0644,cpxA-BAC0532,cueO-BAC0103,cueR/ybbI-BAC0105,cusA/ybdE-…	NA	NA	NA	NA	NA	NA	NA	NA	NA	NA	2018-11-18	community	K84017	F	84	PRJNA604975	SAMN18263204
OX-BSI-38_1	0ca54088-8a5c-4fc9-aa7e-83d5a85afb01	0ca54088-8a5c-4fc9-aa7e-83d5a85afb01_chromo	Chromosome	BSI	5255505	50.46	ecoli	73	NA	NA	NA	NA	blaEC-5	IS100kyp,IS1203,IS1F,IS200C,IS21,IS30,IS630,IS682,ISEc10,ISEc13,ISEc16,ISEc17,ISEc20,ISEc21,ISEc31,ISEc39,ISEc41,ISEc42,ISEc48,ISEc53	NA	acn-BAC0003,acrA-BAC0005,acrE/envC-BAC0009,acrF/envD-BAC0010,actP/yjcG-BAC0564,arsC-BAC0582,arsC-BAC0583,asr-BAC0038,baeS-BAC0040,bfrA-BAC0048,bhsA/ycfR/comC-BAC0049,comR/ycfQ-BAC0076,copA-BAC0725,corA-BAC0086,corB-BAC0643,corD-BAC0644,cpxA-BAC0532,cueO-BAC0103,cueR/ybbI-BAC0105,cusA/ybdE-BAC0107,cusB-BAC0108,cusC/ylcB-BAC0109,cusF/cusX-BAC0110,cusR/ylcA-BAC0111,cusS-BAC0112,cutA-BAC0113,cutC-BAC…	NA	NA	NA	NA	NA	NA	NA	NA	NA	NA	2018-04-10	healthcare associated 0-30d	K82028	M	69	PRJNA604975	SAMN18263203
OX-BSI-38_2	0ca54088-8a5c-4fc9-aa7e-83d5a85afb01	0ca54088-8a5c-4fc9-aa7e-83d5a85afb01_2	Plasmid	BSI	116897	50.87	ecoli	73	NA	NA	1	123	NA	IS100kyp,IS21,IS26,ISEc10,ISEc53	Col156_1,IncFIB(AP001918)_1,IncFII(29)_1_pUTI89	NA	MOBF,MOBP	MPF_F	MOBF	conjugative	PTU-FE	III	1	NA	NA	NA	2018-04-10	healthcare associated 0-30d	K82028	M	69	PRJNA604975	SAMN18263203
OX-BSI-38_5	0ca54088-8a5c-4fc9-aa7e-83d5a85afb01	0ca54088-8a5c-4fc9-aa7e-83d5a85afb01_5	Plasmid	BSI	2973	45.75	ecoli	73	NA	NA	178	3	NA	NA	ColRNAI_1	NA	MOBF	-	-	mobilizable	PTU-E1	III	0.9861	NA	NA	NA	2018-04-10	healthcare associated 0-30d	K82028	M	69	PRJNA604975	SAMN18263203
OX-BSI-38_4	0ca54088-8a5c-4fc9-aa7e-83d5a85afb01	0ca54088-8a5c-4fc9-aa7e-83d5a85afb01_4	Plasmid	BSI	11013	51.84	ecoli	73	NA	NA	38	15	blaTEM-1,sul2	ISVsa3,Tn3	ColRNAI_1	NA	-	-	MOBP	mobilizable	-	-	1	NA	NA	NA	2018-04-10	healthcare associated 0-30d	K82028	M	69	PRJNA604975	SAMN18263203
OX-BSI-38_3	0ca54088-8a5c-4fc9-aa7e-83d5a85afb01	0ca54088-8a5c-4fc9-aa7e-83d5a85afb01_3	Plasmid	BSI	65267	50.58	ecoli	73	NA	NA	77	8	NA	NA	IncFII(pCoo)_1_pCoo	NA	MOBF	MPF_F	MOBF	conjugative	PTU-FE	III	0.9941	NA	NA	NA	2018-04-10	healthcare associated 0-30d	K82028	M	69	PRJNA604975	SAMN18263203
OX-BSI-39_2	0d6465b7-c1d1-4485-82ac-3bf2e2937535	0d6465b7-c1d1-4485-82ac-3bf2e2937535_2	Plasmid	BSI	114235	51.02	ecoli	420	NA	NA	1	123	NA	IS100kyp,IS21,IS26,ISEc10,ISEc53	Col156_1,IncFIB(AP001918)_1,IncFII(29)_1_pUTI89	NA	MOBF,MOBP	MPF_F	MOBF	conjugative	PTU-FE	III	0.6845	NA	NA	NA	2011-06-06	nosocomial	K82065	F	2	PRJNA604975	SAMN14345074
OX-BSI-39_1	0d6465b7-c1d1-4485-82ac-3bf2e2937535	0d6465b7-c1d1-4485-82ac-3bf2e2937535_chromo	Chromosome	BSI	4764012	50.61	ecoli	420	NA	NA	NA	NA	NA	IS1397,IS200C,IS4,IS621,ISEc42	NA	acn-BAC0003,acrA-BAC0005,acrD/yffA-BAC0008,acrE/envC-BAC0009,acrF/envD-BAC0010,actP/yjcG-BAC0564,arsC-BAC0582,asr-BAC0038,baeS-BAC0040,bfrA-BAC0048,bhsA/ycfR/comC-BAC0049,comR/ycfQ-BAC0076,copA-BAC0725,corA-BAC0086,corB-BAC0643,corD-BAC0644,cpxA-BAC0532,cueO-BAC0103,cueR/ybbI-BAC0105,cusA/ybdE-BAC0107,cusB-BAC0108,cusC/ylcB-BAC0109,cusF/cusX-BAC0110,cusR/ylcA-BAC0111,cusS-BAC0112,cutA-BAC0113,cut…	NA	NA	NA	NA	NA	NA	NA	NA	NA	NA	2011-06-06	nosocomial	K82065	F	2	PRJNA604975	SAMN14345074
OX-BSI-40_2	0db25674-24c8-48bc-a703-4a98d31de479	0db25674-24c8-48bc-a703-4a98d31de479_2	Plasmid	BSI	228704	51.11	kpneumoniae	490	NA	NA	19	33	NA	IS1A,IS1X4,IS903,ISEc21,ISEc36,ISKox1,ISKpn2,ISKpn21,ISKpn24,ISSen3	IncFIB(K)_1_Kpn3	copG-BAC0717,fecE-BAC0164,pcoA-BAC0303,pcoB-BAC0304,pcoC-BAC0305,pcoD-BAC0306,pcoE-BAC0307,pcoR-BAC0308,pcoS-BAC0309,silA-BAC0341,silB-BAC0342,silC-BAC0343,silE-BAC0344,silF-BAC0345,silP-BAC0346,silR-BAC0347,silS-BAC0348	-	-	-	non-mobilizable	PTU-E35	I	1	NA	NA	NA	2010-12-08	nosocomial	K84017	M	80	PRJNA604975	NA
OX-BSI-40_3	0db25674-24c8-48bc-a703-4a98d31de479	0db25674-24c8-48bc-a703-4a98d31de479_3	Plasmid	BSI	131877	52.72	kpneumoniae	490	10	5	13	41	aac(3)-IIe,aac(6')-Ib-cr5,aph(3'')-Ib,aph(6)-Id,blaCTX-M-15,blaOXA-1,blaTEM-1,catB3,dfrA14,qnrB1,sul2,tet(A)	IS102,IS5075,IS6100,ISEc9,ISKpn11,Tn5403	IncFII_1_pKP91	blt-BAC0050	MOBF,MOBF	MPF_F	-	conjugative	PTU-FK	III	0.9688	NA	NA	NA	2010-12-08	nosocomial	K84017	M	80	PRJNA604975	NA
OX-BSI-40_4	0db25674-24c8-48bc-a703-4a98d31de479	0db25674-24c8-48bc-a703-4a98d31de479_4	Plasmid	BSI	19078	47.57	kpneumoniae	490	NA	NA	20	32	NA	IS102,IS1X4,ISSen4,Tn5403	IncFIA(HI1)_1_HI1	NA	-	-	MOBF	mobilizable	-	-	1	NA	NA	NA	2010-12-08	nosocomial	K84017	M	80	PRJNA604975	NA
OX-BSI-40_5	0db25674-24c8-48bc-a703-4a98d31de479	0db25674-24c8-48bc-a703-4a98d31de479_5	Plasmid	BSI	9553	51.74	kpneumoniae	490	5	32	18	34	NA	Tn5403	NA	NA	MOBP	-	-	mobilizable	-	-	1	NA	NA	NA	2010-12-08	nosocomial	K84017	M	80	PRJNA604975	NA
OX-BSI-40_6	0db25674-24c8-48bc-a703-4a98d31de479	0db25674-24c8-48bc-a703-4a98d31de479_6	Plasmid	BSI	5366	52.42	kpneumoniae	490	NA	NA	83	7	NA	Tn5403	NA	NA	-	-	-	non-mobilizable	-	-	1	NA	NA	NA	2010-12-08	nosocomial	K84017	M	80	PRJNA604975	NA
OX-BSI-40_1	0db25674-24c8-48bc-a703-4a98d31de479	0db25674-24c8-48bc-a703-4a98d31de479_chromo	Chromosome	BSI	5373673	57.38	kpneumoniae	490	NA	NA	NA	NA	blaSHV-1,fosA,oqxA,oqxB	IS5075,Tn5403	NA	acn-BAC0003,acrA-BAC0005,acrB-BAC0006,acrC-BAC0007,acrD-BAC0563,acrE/envC-BAC0009,acrF/envD-BAC0010,actP/yjcG-BAC0564,adeE-BAC0013,arsB-BAC0578,arsC-BAC0582,arsC-BAC0583,arsR-BAC0589,baeR-BAC0596,baeS-BAC0040,bepG-BAC0046,bfrA-BAC0048,bhsA/ycfR/comC-BAC0049,cepA-BAC0061,comR/ycfQ-BAC0076,copA-BAC0725,corA-BAC0086,corB-BAC0643,corD-BAC0644,corR-BAC0089,cpxA-BAC0532,cueR/ybbI-BAC0105,cusA/ybdE-BAC0…	NA	NA	NA	NA	NA	NA	NA	NA	NA	NA	2010-12-08	nosocomial	K84017	M	80	PRJNA604975	NA
OX-BSI-41_2	0de49eab-5193-4a56-92b7-e48cb0ed8dc0	0de49eab-5193-4a56-92b7-e48cb0ed8dc0_2	Plasmid	BSI	85741	50.25	ecoli	135	NA	NA	3	73	NA	NA	IncI1_1_Alpha	pmrG-BAC0486	MOBP	MPF_I	MOBP	conjugative	PTU-I1	III	1	NA	NA	NA	2009-08-23	community	K84007	F	81	PRJNA604975	NA
OX-BSI-41_3	0de49eab-5193-4a56-92b7-e48cb0ed8dc0	0de49eab-5193-4a56-92b7-e48cb0ed8dc0_3	Plasmid	BSI	3151	33.04	ecoli	135	NA	NA	NA	NA	NA	NA	NA	NA	-	-	-	non-mobilizable	-	-	1	NA	NA	NA	2009-08-23	community	K84007	F	81	PRJNA604975	NA
OX-BSI-41_4	0de49eab-5193-4a56-92b7-e48cb0ed8dc0	0de49eab-5193-4a56-92b7-e48cb0ed8dc0_4	Plasmid	BSI	2839	33.6	ecoli	135	NA	NA	NA	NA	NA	NA	NA	NA	-	-	-	non-mobilizable	-	-	1	NA	NA	NA	2009-08-23	community	K84007	F	81	PRJNA604975	NA
OX-BSI-41_1	0de49eab-5193-4a56-92b7-e48cb0ed8dc0	0de49eab-5193-4a56-92b7-e48cb0ed8dc0_chromo	Chromosome	BSI	4685820	50.66	ecoli	135	NA	NA	NA	NA	NA	IS1397,IS621,ISEc1,ISEc39,ISEc40,ISEc42	NA	acn-BAC0003,acrA-BAC0005,acrD/yffA-BAC0008,acrE/envC-BAC0009,acrF/envD-BAC0010,actP/yjcG-BAC0564,arsC-BAC0582,asr-BAC0038,baeS-BAC0040,bfrA-BAC0048,bhsA/ycfR/comC-BAC0049,comR/ycfQ-BAC0076,copA-BAC0725,copS-BAC0752,corA-BAC0086,corB-BAC0643,corD-BAC0644,cpxA-BAC0532,cueR/ybbI-BAC0105,cusA/ybdE-BAC0107,cusB-BAC0108,cusC/ylcB-BAC0109,cusF/cusX-BAC0110,cusR/ylcA-BAC0111,cusS-BAC0112,cutA-BAC0113,cut…	NA	NA	NA	NA	NA	NA	NA	NA	NA	NA	2009-08-23	community	K84007	F	81	PRJNA604975	NA
OX-BSI-42_1	0df2177e-a058-4aeb-a077-bf22f14fccfd	0df2177e-a058-4aeb-a077-bf22f14fccfd_chromo	Chromosome	BSI	5115354	50.41	ecoli	127	NA	NA	NA	NA	NA	IS1203,IS679,IS682,ISEc13,ISEc16,ISEc21,ISEc38,ISEc39,ISEc40,ISEc42,ISEc48,ISSfl8	NA	acn-BAC0003,acrA-BAC0005,acrB-BAC0006,acrD/yffA-BAC0008,acrE/envC-BAC0009,acrF/envD-BAC0010,actP/yjcG-BAC0564,arsC-BAC0582,arsC-BAC0583,asr-BAC0038,baeS-BAC0040,bfrA-BAC0048,bhsA/ycfR/comC-BAC0049,comR/ycfQ-BAC0076,copA-BAC0725,copS-BAC0752,corA-BAC0086,corB-BAC0643,corD-BAC0644,cpxA-BAC0532,cueO-BAC0103,cueR/ybbI-BAC0105,cusA/ybdE-BAC0107,cusB-BAC0108,cusC/ylcB-BAC0109,cusF/cusX-BAC0110,cusR/ylc…	NA	NA	NA	NA	NA	NA	NA	NA	NA	NA	2018-07-23	community	K84027	M	91	PRJNA604975	SAMN18263188
OX-BSI-43_2	0df2bfbf-ae2f-40fd-84c7-9c89c2393d12	0df2bfbf-ae2f-40fd-84c7-9c89c2393d12_2	Plasmid	BSI	107631	51.33	ecoli	73	NA	NA	15	38	NA	IS1R,IS26,ISEc10,ISKpn26	Col156_1,IncFIB(AP001918)_1,IncFIC(FII)_1	NA	MOBF,MOBP	MPF_F	MOBF	conjugative	PTU-FE	III	0.6882	NA	NA	NA	2018-05-29	healthcare associated 31-365d	K84040	F	104	PRJNA604975	SAMN18263187
OX-BSI-43_1	0df2bfbf-ae2f-40fd-84c7-9c89c2393d12	0df2bfbf-ae2f-40fd-84c7-9c89c2393d12_chromo	Chromosome	BSI	5059757	50.55	ecoli	73	NA	NA	NA	NA	blaEC-5	IS100kyp,IS1F,IS1R,IS630,IS682,IS911,ISEc17,ISEc20,ISEc21,ISEc31,ISEc40,ISEc41,ISEc42	NA	acn-BAC0003,acrA-BAC0005,acrD/yffA-BAC0008,acrE/envC-BAC0009,acrF/envD-BAC0010,actP/yjcG-BAC0564,arsC-BAC0582,arsC-BAC0583,asr-BAC0038,baeS-BAC0040,bfrA-BAC0048,bhsA/ycfR/comC-BAC0049,comR/ycfQ-BAC0076,copA-BAC0725,corA-BAC0086,corB-BAC0643,corD-BAC0644,cpxA-BAC0532,cueO-BAC0103,cueR/ybbI-BAC0105,cusA/ybdE-BAC0107,cusB-BAC0108,cusC/ylcB-BAC0109,cusF/cusX-BAC0110,cusR/ylcA-BAC0111,cusS-BAC0112,cut…	NA	NA	NA	NA	NA	NA	NA	NA	NA	NA	2018-05-29	healthcare associated 31-365d	K84040	F	104	PRJNA604975	SAMN18263187
OX-BSI-43_3	0df2bfbf-ae2f-40fd-84c7-9c89c2393d12	0df2bfbf-ae2f-40fd-84c7-9c89c2393d12_3	Plasmid	BSI	1546	51.75	ecoli	73	NA	NA	29	21	NA	NA	Col(MG828)_1	NA	-	-	MOB_unknown,MOBP	mobilizable	PTU-E9	VI	1	NA	NA	NA	2018-05-29	healthcare associated 31-365d	K84040	F	104	PRJNA604975	SAMN18263187
OX-BSI-44_3	0e511192-eb40-4e2e-b5a9-f93562523eb3	0e511192-eb40-4e2e-b5a9-f93562523eb3_3	Plasmid	BSI	72772	37.01	Proteus vulgaris	-	NA	NA	NA	NA	NA	NA	NA	NA	MOBH	MPF_F	-	conjugative	-	-	1	NA	NA	NA	NA	NA	NA	NA	NA	PRJNA604975	SAMN14345073
OX-BSI-44_2	0e511192-eb40-4e2e-b5a9-f93562523eb3	0e511192-eb40-4e2e-b5a9-f93562523eb3_2	Plasmid	BSI	230572	49.37	Proteus vulgaris	-	NA	NA	NA	NA	qacE	IS1071,ISRle7,TnEc1	NA	qacE-BAC0322	MOBH	-	-	mobilizable	-	-	1	NA	NA	NA	NA	NA	NA	NA	NA	PRJNA604975	SAMN14345073
OX-BSI-44_4	0e511192-eb40-4e2e-b5a9-f93562523eb3	0e511192-eb40-4e2e-b5a9-f93562523eb3_4	Plasmid	BSI	4465	40.83	Proteus vulgaris	-	NA	NA	NA	NA	NA	NA	NA	NA	MOBF	-	-	mobilizable	-	-	1	NA	NA	NA	NA	NA	NA	NA	NA	PRJNA604975	SAMN14345073
OX-BSI-44_1	0e511192-eb40-4e2e-b5a9-f93562523eb3	0e511192-eb40-4e2e-b5a9-f93562523eb3_chromo	Chromosome	BSI	3862216	37.97	Proteus vulgaris	-	NA	NA	NA	NA	NA	NA	NA	abuO-BAC0758,acn-BAC0003,acrB-BAC0006,acrR/ybaH-BAC0011,actP/yjcG-BAC0564,arrA-BAC0709,arsA-BAC0572,arsB-BAC0576,arsC-BAC0583,arsD-BAC0033,arsR-BAC0594,baeS-BAC0040,bcr-BAC0041,bfrA-BAC0048,bmr-BAC0053,cepA-BAC0061,chrR-BAC0538,copA-BAC0725,copR-BAC0753,corB-BAC0643,corC-BAC0088,corD-BAC0644,corR-BAC0089,cpxA-BAC0532,cueR/ybbI-BAC0105,cuiD-BAC0106,cutC-BAC0114,cutE/lnt-BAC0115,cutF/nlpE-BAC0116,c…	NA	NA	NA	NA	NA	NA	NA	NA	NA	NA	NA	NA	NA	NA	NA	PRJNA604975	SAMN14345073
OX-BSI-45_2	0f1f5c79-a055-40b7-b718-143ff1eb43c5	0f1f5c79-a055-40b7-b718-143ff1eb43c5_2	Plasmid	BSI	322071	51.44	ecloacae	-	NA	NA	115	5	aadA2,ant(2'')-Ia,qacEdelta1,qnrA1,sul1,sul1	IS1B,IS26,IS4321R,IS6100,IS903B,ISKpn21	IncHI1A(CIT)_1_pNDM-CIT,IncHI1B(CIT)_1_pNDM-CIT	arsB-BAC0576,arsC-BAC0584,arsH-BAC0034,cepA-BAC0061,dsbC-BAC0138,gesC-BAC0180,merA-BAC0652,merC-BAC0664,merD-BAC0666,merE-BAC0672,merP-BAC0678,merR-BAC0689,merT-BAC0233,mexT-BAC0244,ncrC-BAC0265,oxyRkp-BAC0536,pcoE-BAC0307,pcoS-BAC0309,pmrC-BAC0485,rcnR/yohL-BAC0332,terA-BAC0386,terB-BAC0387,terC-BAC0388,terE-BAC0390,terW-BAC0391,terZ-BAC0392,triC-BAC0398,vmeI-BAC0519	MOBH,MOBP	MPF_F	-	conjugative	PTU-HI1A	IV	1	NA	NA	NA	NA	NA	NA	NA	NA	PRJNA604975	NA
OX-BSI-45_3	0f1f5c79-a055-40b7-b718-143ff1eb43c5	0f1f5c79-a055-40b7-b718-143ff1eb43c5_3	Plasmid	BSI	230932	54.36	ecloacae	-	NA	NA	NA	NA	NA	NA	NA	bhsA/ycfR/comC-BAC0049,comR/ycfQ-BAC0076,fabL/ygaA-BAC0158,fbpC-BAC0162,fecD-BAC0163,fecE-BAC0164,fpvA-BAC0169,mdtG/yceE-BAC0215,nikE-BAC0274,phoB-BAC0530,phoR-BAC0531	-	-	-	non-mobilizable	-	-	1	NA	NA	NA	NA	NA	NA	NA	NA	PRJNA604975	NA
OX-BSI-45_1	0f1f5c79-a055-40b7-b718-143ff1eb43c5	0f1f5c79-a055-40b7-b718-143ff1eb43c5_chromo	Chromosome	BSI	4530190	55.34	ecloacae	-	NA	NA	NA	NA	blaACT-16,fosA,oqxA,oqxB	IS1X2,ISEc19	NA	acn-BAC0003,acrA-BAC0005,acrB-BAC0006,acrC-BAC0007,acrD/yffA-BAC0008,acrE/envC-BAC0009,acrF/envD-BAC0010,actP/yjcG-BAC0564,adeE-BAC0013,arsB-BAC0578,arsC-BAC0582,arsC-BAC0583,baeR-BAC0596,baeS-BAC0040,bepG-BAC0046,bfrA-BAC0048,copA-BAC0725,copR-BAC0719,corA-BAC0641,corB-BAC0643,corC-BAC0088,corD-BAC0644,cpxA-BAC0532,cueR/ybbI-BAC0105,cusA/ybdE-BAC0107,cusB-BAC0108,cutA-BAC0113,cutC-BAC0114,cutE/l…	NA	NA	NA	NA	NA	NA	NA	NA	NA	NA	NA	NA	NA	NA	NA	PRJNA604975	NA
OX-BSI-46_5	102bcca4-ee70-4251-bef5-bcfaebc1e3dc	102bcca4-ee70-4251-bef5-bcfaebc1e3dc_5	Plasmid	BSI	8274	47.09	ecoli	80	NA	NA	86	7	blaTEM-1	Tn3	ColRNAI_1	NA	MOBF	-	MOB_unknown	mobilizable	-	-	1	NA	NA	NA	2009-11-07	healthcare associated 0-30d	K84073	F	75	PRJNA604975	SAMN18263174
OX-BSI-46_2	102bcca4-ee70-4251-bef5-bcfaebc1e3dc	102bcca4-ee70-4251-bef5-bcfaebc1e3dc_2	Plasmid	BSI	89674	53.01	ecoli	80	NA	NA	7	58	aph(3'')-Ib,blaTEM-1,sul2	NA	IncB/O/K/Z_2	NA	MOBP	MPF_I	MOBP	conjugative	PTU-B/O/K/Z	III	1	NA	NA	NA	2009-11-07	healthcare associated 0-30d	K84073	F	75	PRJNA604975	SAMN18263174
OX-BSI-46_7	102bcca4-ee70-4251-bef5-bcfaebc1e3dc	102bcca4-ee70-4251-bef5-bcfaebc1e3dc_7	Plasmid	BSI	5093	48.73	ecoli	80	NA	NA	NA	NA	NA	NA	Col8282_1	NA	MOBQ	-	MOBQ,MOBQ	mobilizable	PTU-E10	III	1	NA	NA	NA	2009-11-07	healthcare associated 0-30d	K84073	F	75	PRJNA604975	SAMN18263174
OX-BSI-46_3	102bcca4-ee70-4251-bef5-bcfaebc1e3dc	102bcca4-ee70-4251-bef5-bcfaebc1e3dc_3	Plasmid	BSI	73920	50.87	ecoli	80	NA	NA	12	42	blaTEM-1	Tn3	IncFII_1	NA	MOBF	MPF_F	MOBF	conjugative	PTU-FE	III	1	NA	NA	NA	2009-11-07	healthcare associated 0-30d	K84073	F	75	PRJNA604975	SAMN18263174
OX-BSI-46_1	102bcca4-ee70-4251-bef5-bcfaebc1e3dc	102bcca4-ee70-4251-bef5-bcfaebc1e3dc_chromo	Chromosome	BSI	5282855	50.3	ecoli	80	NA	NA	NA	NA	blaEC-5	IS100kyp,IS1203,IS1397,IS1F,IS621,IS630,IS682,ISEc13,ISEc16,ISEc17,ISEc20,ISEc39,ISEc42,ISEc48	NA	acn-BAC0003,acrA-BAC0005,acrB-BAC0006,acrD/yffA-BAC0008,acrE/envC-BAC0009,acrF/envD-BAC0010,actP/yjcG-BAC0564,arsC-BAC0582,arsC-BAC0583,asr-BAC0038,baeS-BAC0040,bfrA-BAC0048,bhsA/ycfR/comC-BAC0049,comR/ycfQ-BAC0076,copA-BAC0725,corA-BAC0086,corB-BAC0643,corD-BAC0644,cpxA-BAC0532,cueO-BAC0103,cueR/ybbI-BAC0105,cusA/ybdE-BAC0107,cusB-BAC0108,cusC/ylcB-BAC0109,cusF/cusX-BAC0110,cusR/ylcA-BAC0111,cus…	NA	NA	NA	NA	NA	NA	NA	NA	NA	NA	2009-11-07	healthcare associated 0-30d	K84073	F	75	PRJNA604975	SAMN18263174
OX-BSI-46_6	102bcca4-ee70-4251-bef5-bcfaebc1e3dc	102bcca4-ee70-4251-bef5-bcfaebc1e3dc_6	Plasmid	BSI	6860	49.29	ecoli	80	NA	NA	138	4	NA	NA	ColRNAI_1	NA	MOBP	-	MOBP	mobilizable	PTU-E1	III	0.7952	NA	NA	NA	2009-11-07	healthcare associated 0-30d	K84073	F	75	PRJNA604975	SAMN18263174
OX-BSI-46_4	102bcca4-ee70-4251-bef5-bcfaebc1e3dc	102bcca4-ee70-4251-bef5-bcfaebc1e3dc_4	Plasmid	BSI	46248	49.53	ecoli	80	NA	NA	NA	NA	NA	NA	NA	NA	-	-	-	non-mobilizable	-	-	1	NA	NA	NA	2009-11-07	healthcare associated 0-30d	K84073	F	75	PRJNA604975	SAMN18263174
OX-BSI-47_5	10554175-1812-4506-a177-a0d0c0206ac0	10554175-1812-4506-a177-a0d0c0206ac0_5	Plasmid	BSI	1308	47.78	ecoli	144	NA	NA	179	3	NA	NA	NA	NA	-	-	-	non-mobilizable	-	-	1	NA	NA	NA	2018-05-01	healthcare associated 31-365d	K84059	F	94	PRJNA604975	SAMN18263172
OX-BSI-47_4	10554175-1812-4506-a177-a0d0c0206ac0	10554175-1812-4506-a177-a0d0c0206ac0_4	Plasmid	BSI	4066	50.15	ecoli	144	NA	NA	139	4	NA	NA	Col8282_1	NA	MOBQ	-	MOBQ,MOBQ	mobilizable	PTU-E10	III	1	NA	NA	NA	2018-05-01	healthcare associated 31-365d	K84059	F	94	PRJNA604975	SAMN18263172
OX-BSI-47_3	10554175-1812-4506-a177-a0d0c0206ac0	10554175-1812-4506-a177-a0d0c0206ac0_3	Plasmid	BSI	5631	47.38	ecoli	144	NA	NA	11	43	NA	NA	ColRNAI_1	NA	MOBP	-	MOBP	mobilizable	PTU-E22	I	1	NA	NA	NA	2018-05-01	healthcare associated 31-365d	K84059	F	94	PRJNA604975	SAMN18263172
OX-BSI-47_2	10554175-1812-4506-a177-a0d0c0206ac0	10554175-1812-4506-a177-a0d0c0206ac0_2	Plasmid	BSI	123801	51.16	ecoli	144	NA	NA	1	123	NA	IS26,ISEc10,ISEc22,ISEc53,ISKpn26	Col156_1,IncFIB(AP001918)_1,IncFII(29)_1_pUTI89	NA	MOBF,MOBP	MPF_F	MOBF	conjugative	PTU-FE	III	1	NA	NA	NA	2018-05-01	healthcare associated 31-365d	K84059	F	94	PRJNA604975	SAMN18263172
OX-BSI-47_1	10554175-1812-4506-a177-a0d0c0206ac0	10554175-1812-4506-a177-a0d0c0206ac0_chromo	Chromosome	BSI	5136239	50.58	ecoli	144	NA	NA	NA	NA	NA	IS1203,IS1397,IS150,IS1F,IS911,ISEc40,ISEc42,ISEc48,ISEcl1,ISErsp1,ISKpn26	NA	acn-BAC0003,acrA-BAC0005,acrD/yffA-BAC0008,acrE/envC-BAC0009,acrF/envD-BAC0010,actP/yjcG-BAC0564,arsC-BAC0582,arsC-BAC0583,asr-BAC0038,baeS-BAC0040,bfrA-BAC0048,comR/ycfQ-BAC0076,copA-BAC0725,copS-BAC0752,corA-BAC0086,corB-BAC0643,corD-BAC0644,cpxA-BAC0532,cueO-BAC0103,cueR/ybbI-BAC0105,cusA/ybdE-BAC0107,cusB-BAC0108,cusC/ylcB-BAC0109,cusF/cusX-BAC0110,cusR/ylcA-BAC0111,cusS-BAC0112,cutA-BAC0113,…	NA	NA	NA	NA	NA	NA	NA	NA	NA	NA	2018-05-01	healthcare associated 31-365d	K84059	F	94	PRJNA604975	SAMN18263172
OX-BSI-48_2	1066082a-9db5-498d-bdca-7ce6be4b5f84	1066082a-9db5-498d-bdca-7ce6be4b5f84_2	Plasmid	BSI	215512	50.44	kpneumoniae	86	17	2	78	8	NA	IS100kyp,IS1A,IS1N,IS903B,ISKox1,ISSpu2	IncFIB(K)_1_Kpn3,IncHI1B_1_pNDM-MAR	copG-BAC0717,fecD-BAC0163,fecE-BAC0164,nikD-BAC0273,nikE-BAC0274,pbrA-BAC0298,pbrB/pbrC-BAC0299,pbrR-BAC0301,pcoA-BAC0303,pcoB-BAC0304,pcoC-BAC0305,pcoD-BAC0306,pcoR-BAC0308,pcoS-BAC0309,silA-BAC0341,silB-BAC0342,silC-BAC0343,silE-BAC0344,silF-BAC0345,silP-BAC0346,silR-BAC0347,silS-BAC0348,smdB-BAC0354,terA-BAC0386,terB-BAC0387,terC-BAC0388,terE-BAC0390,terW-BAC0391,terZ-BAC0392,ybtQ-BAC0433	-	-	-	non-mobilizable	PTU-E21	I	1	NA	NA	NA	2014-05-09	healthcare associated 31-365d	K84033	M	94	PRJNA604975	NA
OX-BSI-48_1	1066082a-9db5-498d-bdca-7ce6be4b5f84	1066082a-9db5-498d-bdca-7ce6be4b5f84_chromo	Chromosome	BSI	5277269	57.54	kpneumoniae	86	NA	NA	NA	NA	blaSHV-1,fosA10,oqxA11,oqxB19	ISKpn28,ISSty2	NA	acn-BAC0003,acrA-BAC0005,acrB-BAC0006,acrC-BAC0007,acrD-BAC0563,acrE/envC-BAC0009,acrF/envD-BAC0010,actP/yjcG-BAC0564,adeE-BAC0013,arsB-BAC0578,arsC-BAC0582,arsC-BAC0583,arsR-BAC0589,baeR-BAC0596,baeS-BAC0040,bepG-BAC0046,bfrA-BAC0048,bhsA/ycfR/comC-BAC0049,cepA-BAC0061,comR/ycfQ-BAC0076,copA-BAC0725,corA-BAC0086,corB-BAC0643,corD-BAC0644,corR-BAC0089,cpxA-BAC0532,cueR/ybbI-BAC0105,cusA/ybdE-BAC0…	NA	NA	NA	NA	NA	NA	NA	NA	NA	NA	2014-05-09	healthcare associated 31-365d	K84033	M	94	PRJNA604975	NA
OX-BSI-49_5	10cee15d-06e2-4ae2-9155-2f0581ef0a3a	10cee15d-06e2-4ae2-9155-2f0581ef0a3a_5	Plasmid	BSI	5716	42.34	ecoli	95	6	5	31	20	NA	NA	Col156_1	NA	MOBQ	-	-	mobilizable	-	-	1	NA	NA	NA	2018-10-06	healthcare associated 0-30d	L84010	F	21	PRJNA604975	SAMN18263167
OX-BSI-49_4	10cee15d-06e2-4ae2-9155-2f0581ef0a3a	10cee15d-06e2-4ae2-9155-2f0581ef0a3a_4	Plasmid	BSI	6715	45.57	ecoli	95	NA	NA	180	3	NA	NA	ColRNAI_1	NA	MOBP,MOBP,MOBP	-	MOBP	mobilizable	-	-	1	NA	NA	NA	2018-10-06	healthcare associated 0-30d	L84010	F	21	PRJNA604975	SAMN18263167
OX-BSI-49_7	10cee15d-06e2-4ae2-9155-2f0581ef0a3a	10cee15d-06e2-4ae2-9155-2f0581ef0a3a_7	Plasmid	BSI	2851	52.44	ecoli	95	NA	NA	NA	NA	NA	NA	NA	NA	-	-	MOBP	mobilizable	-	-	1	NA	NA	NA	2018-10-06	healthcare associated 0-30d	L84010	F	21	PRJNA604975	SAMN18263167
OX-BSI-49_3	10cee15d-06e2-4ae2-9155-2f0581ef0a3a	10cee15d-06e2-4ae2-9155-2f0581ef0a3a_3	Plasmid	BSI	7939	41.63	ecoli	95	NA	NA	41	14	NA	NA	ColRNAI_1	NA	MOBP,MOBP	-	MOBP	mobilizable	PTU-E1	III	0.9583	NA	NA	NA	2018-10-06	healthcare associated 0-30d	L84010	F	21	PRJNA604975	SAMN18263167
OX-BSI-49_2	10cee15d-06e2-4ae2-9155-2f0581ef0a3a	10cee15d-06e2-4ae2-9155-2f0581ef0a3a_2	Plasmid	BSI	151926	49.37	ecoli	95	NA	NA	2	100	NA	IS3,IS30,IS629,IS91,ISEc8	IncFIB(AP001918)_1,IncFIC(FII)_1	sitA-BAC0349,sitB-BAC0350,sitC-BAC0351,sitD-BAC0352,smdB-BAC0354,tupC-BAC0607	MOBF	MPF_F	MOBF	conjugative	PTU-FE	III	1	NA	NA	NA	2018-10-06	healthcare associated 0-30d	L84010	F	21	PRJNA604975	SAMN18263167
OX-BSI-49_1	10cee15d-06e2-4ae2-9155-2f0581ef0a3a	10cee15d-06e2-4ae2-9155-2f0581ef0a3a_chromo	Chromosome	BSI	5154067	50.67	ecoli	95	NA	NA	NA	NA	NA	IS1397,IS1A,IS1F,IS200C,IS3,IS30,IS621,ISEc13,ISEc20,ISEc38,ISEc45	NA	acn-BAC0003,acrA-BAC0005,acrD/yffA-BAC0008,acrE/envC-BAC0009,acrF/envD-BAC0010,actP/yjcG-BAC0564,arsC-BAC0582,arsC-BAC0583,asr-BAC0038,baeS-BAC0040,bfrA-BAC0048,bhsA/ycfR/comC-BAC0049,comR/ycfQ-BAC0076,copA-BAC0725,corA-BAC0086,corB-BAC0643,corD-BAC0644,cpxA-BAC0532,cueO-BAC0103,cueR/ybbI-BAC0105,cusA/ybdE-BAC0107,cusB-BAC0108,cusC/ylcB-BAC0109,cusF/cusX-BAC0110,cusR/ylcA-BAC0111,cusS-BAC0112,cut…	NA	NA	NA	NA	NA	NA	NA	NA	NA	NA	2018-10-06	healthcare associated 0-30d	L84010	F	21	PRJNA604975	SAMN18263167
OX-BSI-49_6	10cee15d-06e2-4ae2-9155-2f0581ef0a3a	10cee15d-06e2-4ae2-9155-2f0581ef0a3a_6	Plasmid	BSI	5165	47.45	ecoli	95	NA	NA	4	69	NA	NA	Col156_1	NA	MOBQ	-	-	mobilizable	PTU-E7	III	1	NA	NA	NA	2018-10-06	healthcare associated 0-30d	L84010	F	21	PRJNA604975	SAMN18263167
OX-BSI-50_1	10fdb62a-d39d-4135-95a6-d6599afa2283	10fdb62a-d39d-4135-95a6-d6599afa2283_chromo	Chromosome	BSI	5358535	57.4	kpneumoniae	14	NA	NA	NA	NA	blaSHV-1,fosA,oqxA,oqxB	IS1400,IS1F,IS903,ISEhe2	NA	acn-BAC0003,acrA-BAC0005,acrB-BAC0006,acrC-BAC0007,acrD-BAC0563,acrE/envC-BAC0009,acrF/envD-BAC0010,actP/yjcG-BAC0564,adeE-BAC0013,arsB-BAC0578,arsC-BAC0582,arsC-BAC0583,arsR-BAC0589,baeR-BAC0596,baeS-BAC0040,bfrA-BAC0048,bhsA/ycfR/comC-BAC0049,cepA-BAC0061,comR/ycfQ-BAC0076,copA-BAC0725,corA-BAC0086,corB-BAC0643,corD-BAC0644,corR-BAC0089,cpxA-BAC0532,cueR/ybbI-BAC0105,cusA/ybdE-BAC0107,cusB-BAC0…	NA	NA	NA	NA	NA	NA	NA	NA	NA	NA	2018-04-25	nosocomial	K84025	F	66	PRJNA604975	NA
OX-BSI-50_2	10fdb62a-d39d-4135-95a6-d6599afa2283	10fdb62a-d39d-4135-95a6-d6599afa2283_2	Plasmid	BSI	203566	53.47	kpneumoniae	14	NA	NA	16	37	aadA1,blaSHV-1,dfrA1,qacEdelta1,sul1,tet(D)	IS1F,IS1R,IS1X3,IS903,ISEcl1,ISKpn26,ISKpn28	IncFIB(K)_1_Kpn3	arsA-BAC0571,arsC-BAC0582,arsC-BAC0584,arsR-BAC0589,arsR-BAC0591,copG-BAC0717,merA-BAC0652,merC-BAC0664,merD-BAC0666,merE-BAC0672,merP-BAC0678,merR-BAC0689,merT-BAC0233,norA-BAC0282,pcoA-BAC0303,pcoB-BAC0304,pcoC-BAC0305,pcoD-BAC0306,pcoE-BAC0307,pcoR-BAC0308,pcoS-BAC0309,qacEdelta1-BAC0323,silA-BAC0341,silB-BAC0342,silC-BAC0343,silE-BAC0344,silF-BAC0345,silP-BAC0346,silR-BAC0347,silS-BAC0348,sug…	MOBF,MOBF	MPF_F	-	conjugative	PTU-FK	III	0.9922	NA	NA	NA	2018-04-25	nosocomial	K84025	F	66	PRJNA604975	NA
OX-BSI-50_3	10fdb62a-d39d-4135-95a6-d6599afa2283	10fdb62a-d39d-4135-95a6-d6599afa2283_3	Plasmid	BSI	4096	55.52	kpneumoniae	14	NA	NA	48	13	NA	NA	Col440I_1,Col440II_1	NA	MOBP	-	MOBP	mobilizable	PTU-E3	V	0.8806	NA	NA	NA	2018-04-25	nosocomial	K84025	F	66	PRJNA604975	NA
OX-BSI-51_2	1142371a-2563-46c0-b6d2-f873e9ec8690	1142371a-2563-46c0-b6d2-f873e9ec8690_2	Plasmid	BSI	248687	52.71	koxytoca	49	NA	NA	NA	NA	NA	IS1A,IS5075,ISEc52,ISEc8,ISEhe3,ISKpn21	IncFIB(K)_1_Kpn3	arsA-BAC0030,arsB-BAC0576,arsB-BAC0577,arsC-BAC0583,arsC-BAC0584,arsD-BAC0587,arsH-BAC0034,arsR-BAC0588,arsR-BAC0591,copG-BAC0717,fecE-BAC0164,nikB-BAC0271,nikC-BAC0272,nikD-BAC0273,pcoA-BAC0303,pcoB-BAC0304,pcoC-BAC0305,pcoD-BAC0306,pcoE-BAC0307,pcoR-BAC0308,pcoS-BAC0309,pstB-BAC0316,silA-BAC0341,silB-BAC0342,silC-BAC0343,silE-BAC0344,silF-BAC0345,silP-BAC0346,silR-BAC0347,silS-BAC0348	-	-	-	non-mobilizable	-	-	1	NA	NA	NA	2013-09-26	healthcare associated 0-30d	K84014	M	59	PRJNA604975	NA
OX-BSI-51_3	1142371a-2563-46c0-b6d2-f873e9ec8690	1142371a-2563-46c0-b6d2-f873e9ec8690_3	Plasmid	BSI	142443	52.77	koxytoca	49	NA	NA	13	41	aac(3)-IIe,aac(6')-Ib-cr5,aph(3'')-Ib,aph(6)-Id,blaCTX-M-15,blaOXA-1,blaTEM-1,catB3,dfrA14,qnrB1,sul2,tet(A)	IS102,IS5075,IS6100,ISEc9,ISKpn11,ISKpn21,Tn5403	IncFII_1_pKP91	blt-BAC0050	MOBF,MOBF	MPF_F	-	conjugative	PTU-FK	III	1	NA	NA	NA	2013-09-26	healthcare associated 0-30d	K84014	M	59	PRJNA604975	NA
OX-BSI-51_4	1142371a-2563-46c0-b6d2-f873e9ec8690	1142371a-2563-46c0-b6d2-f873e9ec8690_4	Plasmid	BSI	75269	53.33	koxytoca	49	NA	NA	NA	NA	NA	ISEas1,ISPpu12	IncFII(p14)_1_p14	dpsA-BAC0135,emrCsm-BAC0501,pbrR-BAC0301	-	-	-	non-mobilizable	-	-	1	NA	NA	NA	2013-09-26	healthcare associated 0-30d	K84014	M	59	PRJNA604975	NA
OX-BSI-51_5	1142371a-2563-46c0-b6d2-f873e9ec8690	1142371a-2563-46c0-b6d2-f873e9ec8690_5	Plasmid	BSI	3870	45.81	koxytoca	49	NA	NA	NA	NA	NA	NA	Col440I_1	NA	-	-	-	non-mobilizable	PTU-?	II	0.75	NA	NA	NA	2013-09-26	healthcare associated 0-30d	K84014	M	59	PRJNA604975	NA
OX-BSI-51_1	1142371a-2563-46c0-b6d2-f873e9ec8690	1142371a-2563-46c0-b6d2-f873e9ec8690_chromo	Chromosome	BSI	6110523	55.87	koxytoca	49	NA	NA	NA	NA	blaOXY,oqxA,oqxB	ISPpu12	NA	acn-BAC0003,acrA-BAC0005,acrC-BAC0007,acrD-BAC0563,acrE/envC-BAC0009,acrF/envD-BAC0010,actP/yjcG-BAC0564,adeE-BAC0013,arsB-BAC0578,arsC-BAC0583,arsC-BAC0584,arsR-BAC0589,baeS-BAC0040,bepG-BAC0046,bfrA-BAC0048,bhsA/ycfR/comC-BAC0049,cepA-BAC0061,comR/ycfQ-BAC0076,copA-BAC0725,copS-BAC0637,corA-BAC0086,corB-BAC0643,corD-BAC0644,cpxA-BAC0532,cueR/ybbI-BAC0105,cuiD-BAC0106,cusA/ybdE-BAC0107,cusB-BAC0…	NA	NA	NA	NA	NA	NA	NA	NA	NA	NA	2013-09-26	healthcare associated 0-30d	K84014	M	59	PRJNA604975	NA
OX-BSI-52_1	11540ee1-36b6-4b88-a504-96dd0bc62866	11540ee1-36b6-4b88-a504-96dd0bc62866_chromo	Chromosome	BSI	5215065	50.46	ecoli	12	NA	NA	NA	NA	aadA1,dfrA1,sat2	IS100kyp,IS1B,IS1R,IS2,IS200C,IS3411,IS621,IS682,ISEc13,ISEc16,ISEc20,ISEc22,ISEc40,ISEc41,ISEc42,ISEc48,ISEc49,ISSd1,ISSen4	NA	acn-BAC0003,acrA-BAC0005,acrE/envC-BAC0009,acrF/envD-BAC0010,actP/yjcG-BAC0564,arsC-BAC0582,arsC-BAC0583,asr-BAC0038,baeR-BAC0039,baeS-BAC0040,bfrA-BAC0048,bhsA/ycfR/comC-BAC0049,comR/ycfQ-BAC0076,copA-BAC0725,corA-BAC0086,corB-BAC0643,corD-BAC0644,cpxA-BAC0532,cueO-BAC0103,cueR/ybbI-BAC0105,cusA/ybdE-BAC0107,cusB-BAC0108,cusC/ylcB-BAC0109,cusF/cusX-BAC0110,cusR/ylcA-BAC0111,cusS-BAC0112,cutA-BAC…	NA	NA	NA	NA	NA	NA	NA	NA	NA	NA	2009-08-13	healthcare associated 31-365d	K84040	M	85	PRJNA604975	SAMN18263163
OX-BSI-52_2	11540ee1-36b6-4b88-a504-96dd0bc62866	11540ee1-36b6-4b88-a504-96dd0bc62866_2	Plasmid	BSI	134761	52.32	ecoli	12	NA	NA	5	68	aph(3'')-Ib,aph(3')-Ia,aph(6)-Id,blaTEM-1,sul2,tet(B)	IS1203,IS150,IS1A,IS1B,IS1X2,IS5,ISEc12	IncFIA_1,IncFIB(AP001918)_1,IncFII(pRSB107)_1_pRSB107	blt-BAC0050,iclR-BAC0196,merA-BAC0652,merC-BAC0664,merD-BAC0666,merE-BAC0670,merP-BAC0678,merR-BAC0232,merT-BAC0693,wtpC-BAC0604	MOBF	MPF_F	MOBF	conjugative	PTU-FE	III	0.9825	NA	NA	NA	2009-08-13	healthcare associated 31-365d	K84040	M	85	PRJNA604975	SAMN18263163
OX-BSI-53_2	11f973e0-91ed-41ee-b700-659682615cae	11f973e0-91ed-41ee-b700-659682615cae_2	Plasmid	BSI	29641	45.99	ecoli	420	NA	NA	NA	NA	NA	NA	NA	NA	MOBP	MPF_T	-	conjugative	-	-	1	NA	NA	NA	2018-11-08	healthcare associated 0-30d	K84017	M	73	PRJNA604975	SAMN18263160
OX-BSI-53_1	11f973e0-91ed-41ee-b700-659682615cae	11f973e0-91ed-41ee-b700-659682615cae_chromo	Chromosome	BSI	4665365	50.63	ecoli	420	NA	NA	NA	NA	NA	IS100kyp,IS1397,IS200C,IS4,IS621,ISEc42	NA	acn-BAC0003,acrA-BAC0005,acrD/yffA-BAC0008,acrE/envC-BAC0009,acrF/envD-BAC0010,actP/yjcG-BAC0564,arsC-BAC0582,asr-BAC0038,baeS-BAC0040,bfrA-BAC0048,bhsA/ycfR/comC-BAC0049,comR/ycfQ-BAC0076,copA-BAC0725,copS-BAC0752,corA-BAC0086,corB-BAC0643,corD-BAC0644,cpxA-BAC0532,cueO-BAC0103,cueR/ybbI-BAC0105,cusA/ybdE-BAC0107,cusB-BAC0108,cusC/ylcB-BAC0109,cusF/cusX-BAC0110,cusR/ylcA-BAC0111,cusS-BAC0112,cut…	NA	NA	NA	NA	NA	NA	NA	NA	NA	NA	2018-11-08	healthcare associated 0-30d	K84017	M	73	PRJNA604975	SAMN18263160
OX-BSI-54_3	1266f7c3-0745-44db-afdc-f9b4f21a88d3	1266f7c3-0745-44db-afdc-f9b4f21a88d3_3	Plasmid	BSI	100770	52.35	ecoli	127	NA	NA	7	58	aph(3'')-Ib,aph(6)-Id,blaTEM-1,sul2	ISEc23,Tn3	IncB/O/K/Z_2	NA	MOBP	MPF_I	MOBP	conjugative	PTU-B/O/K/Z	III	1	NA	NA	NA	2018-04-15	healthcare associated 31-365d	K84047	M	58	PRJNA604975	SAMN18263156
OX-BSI-54_1	1266f7c3-0745-44db-afdc-f9b4f21a88d3	1266f7c3-0745-44db-afdc-f9b4f21a88d3_chromo	Chromosome	BSI	5139609	50.43	ecoli	127	NA	NA	NA	NA	NA	IS1203,IS21,IS682,ISEc13,ISEc16,ISEc20,ISEc38,ISEc40,ISEc42	NA	acn-BAC0003,acrA-BAC0005,acrD/yffA-BAC0008,acrE/envC-BAC0009,acrF/envD-BAC0010,actP/yjcG-BAC0564,arsC-BAC0582,arsC-BAC0583,asr-BAC0038,baeS-BAC0040,bfrA-BAC0048,bhsA/ycfR/comC-BAC0049,comR/ycfQ-BAC0076,copA-BAC0725,copS-BAC0752,corA-BAC0086,corB-BAC0643,corD-BAC0644,cpxA-BAC0532,cueO-BAC0103,cueR/ybbI-BAC0105,cusA/ybdE-BAC0107,cusB-BAC0108,cusC/ylcB-BAC0109,cusF/cusX-BAC0110,cusR/ylcA-BAC0111,cus…	NA	NA	NA	NA	NA	NA	NA	NA	NA	NA	2018-04-15	healthcare associated 31-365d	K84047	M	58	PRJNA604975	SAMN18263156
OX-BSI-54_2	1266f7c3-0745-44db-afdc-f9b4f21a88d3	1266f7c3-0745-44db-afdc-f9b4f21a88d3_2	Plasmid	BSI	114243	51.02	ecoli	127	NA	NA	1	123	NA	IS100kyp,IS21,IS26,ISEc10,ISEc53	Col156_1,IncFIB(AP001918)_1,IncFII(29)_1_pUTI89	NA	MOBF,MOBP	MPF_F	MOBF	conjugative	PTU-FE	III	0.994	NA	NA	NA	2018-04-15	healthcare associated 31-365d	K84047	M	58	PRJNA604975	SAMN18263156
OX-BSI-55_2	12885be0-e7d8-4fb7-bab1-de366f8a2a15	12885be0-e7d8-4fb7-bab1-de366f8a2a15_2	Plasmid	BSI	120139	50.74	ecoli	127	NA	NA	1	123	blaTEM-1	IS100kyp,IS21,ISEc23,ISEc53	Col156_1,IncFIB(AP001918)_1,IncFII(29)_1_pUTI89	NA	MOBF,MOBP	MPF_F	MOBF	conjugative	PTU-FE	III	0.9941	NA	NA	NA	2018-07-02	community	K84040	F	94	PRJNA604975	SAMN18263154
OX-BSI-55_1	12885be0-e7d8-4fb7-bab1-de366f8a2a15	12885be0-e7d8-4fb7-bab1-de366f8a2a15_chromo	Chromosome	BSI	5132660	50.47	ecoli	127	NA	NA	NA	NA	NA	IS1203,IS682,ISEc13,ISEc16,ISEc20,ISEc38,ISEc40,ISEc42	NA	acn-BAC0003,acrA-BAC0005,acrB-BAC0006,acrD/yffA-BAC0008,acrE/envC-BAC0009,acrF/envD-BAC0010,actP/yjcG-BAC0564,adeE-BAC0013,arsC-BAC0582,arsC-BAC0583,asr-BAC0038,baeS-BAC0040,bfrA-BAC0048,bhsA/ycfR/comC-BAC0049,comR/ycfQ-BAC0076,copA-BAC0725,copS-BAC0752,corA-BAC0086,corB-BAC0643,corD-BAC0644,cpxA-BAC0532,cueO-BAC0103,cueR/ybbI-BAC0105,cusA/ybdE-BAC0107,cusB-BAC0108,cusC/ylcB-BAC0109,cusF/cusX-BAC…	NA	NA	NA	NA	NA	NA	NA	NA	NA	NA	2018-07-02	community	K84040	F	94	PRJNA604975	SAMN18263154
OX-BSI-55_3	12885be0-e7d8-4fb7-bab1-de366f8a2a15	12885be0-e7d8-4fb7-bab1-de366f8a2a15_3	Plasmid	BSI	5631	47.38	ecoli	127	NA	NA	11	43	NA	NA	ColRNAI_1	NA	MOBP	-	MOBP	mobilizable	PTU-E22	I	1	NA	NA	NA	2018-07-02	community	K84040	F	94	PRJNA604975	SAMN18263154
OX-BSI-56_2	131e5e5f-9e96-4d4e-a0a0-fd3398f6e5c8	131e5e5f-9e96-4d4e-a0a0-fd3398f6e5c8_2	Plasmid	BSI	139212	50.03	ecoli	95	NA	NA	2	100	blaTEM-1	IS2,IS629,ISEc12,ISEc32,Tn3	IncFIB(AP001918)_1,IncFII_1	sitA-BAC0349,sitB-BAC0350,sitC-BAC0351,sitD-BAC0352,smdB-BAC0354,tupC-BAC0607	MOBF	MPF_F	MOBF	conjugative	PTU-?	III	0.6905	NA	NA	NA	2018-10-25	healthcare associated 31-365d	K84058	M	77	PRJNA604975	SAMN18263147
OX-BSI-56_3	131e5e5f-9e96-4d4e-a0a0-fd3398f6e5c8	131e5e5f-9e96-4d4e-a0a0-fd3398f6e5c8_3	Plasmid	BSI	4074	49.83	ecoli	95	NA	NA	9	51	NA	NA	Col8282_1	NA	MOBQ	-	MOBQ,MOBQ	mobilizable	PTU-E10	III	1	NA	NA	NA	2018-10-25	healthcare associated 31-365d	K84058	M	77	PRJNA604975	SAMN18263147
OX-BSI-56_1	131e5e5f-9e96-4d4e-a0a0-fd3398f6e5c8	131e5e5f-9e96-4d4e-a0a0-fd3398f6e5c8_chromo	Chromosome	BSI	5050012	50.7	ecoli	95	NA	NA	NA	NA	NA	IS1203,IS1397,IS1F,IS200C,IS30,IS621,ISEc23,ISEc30,ISEc38,ISEc48	NA	acn-BAC0003,acrA-BAC0005,acrD/yffA-BAC0008,acrE/envC-BAC0009,acrF/envD-BAC0010,actP/yjcG-BAC0564,arsC-BAC0582,arsC-BAC0583,asr-BAC0038,baeS-BAC0040,bfrA-BAC0048,bhsA/ycfR/comC-BAC0049,comR/ycfQ-BAC0076,copA-BAC0725,corA-BAC0086,corB-BAC0643,corD-BAC0644,cpxA-BAC0532,cueO-BAC0103,cueR/ybbI-BAC0105,cusA/ybdE-BAC0107,cusB-BAC0108,cusC/ylcB-BAC0109,cusF/cusX-BAC0110,cusR/ylcA-BAC0111,cusS-BAC0112,cut…	NA	NA	NA	NA	NA	NA	NA	NA	NA	NA	2018-10-25	healthcare associated 31-365d	K84058	M	77	PRJNA604975	SAMN18263147
OX-BSI-57_1	1321227c-a885-4f7e-9953-5e8a958f6cb0	1321227c-a885-4f7e-9953-5e8a958f6cb0_chromo	Chromosome	BSI	5142849	50.43	ecoli	372	NA	NA	NA	NA	blaTEM-1,catA1	IS1397,IS1414,IS15DII,IS1F,IS1R,IS621,IS629,IS682,ISEc17,ISEc21,ISEc31,ISEc42,ISEc45,ISEc8	NA	acn-BAC0003,acrA-BAC0005,acrB-BAC0006,acrD/yffA-BAC0008,acrE/envC-BAC0009,acrF/envD-BAC0010,actP/yjcG-BAC0564,arsC-BAC0582,asr-BAC0038,baeS-BAC0040,bfrA-BAC0048,bhsA/ycfR/comC-BAC0049,comR/ycfQ-BAC0076,copA-BAC0725,corA-BAC0086,corB-BAC0643,corD-BAC0644,cpxA-BAC0532,cueO-BAC0103,cueR/ybbI-BAC0105,cusA/ybdE-BAC0107,cusB-BAC0108,cusC/ylcB-BAC0109,cusF/cusX-BAC0110,cusR/ylcA-BAC0111,cusS-BAC0112,cut…	NA	NA	NA	NA	NA	NA	NA	NA	NA	NA	2012-08-16	community	K84048	F	64	PRJNA604975	SAMN14345072
OX-BSI-57_3	1321227c-a885-4f7e-9953-5e8a958f6cb0	1321227c-a885-4f7e-9953-5e8a958f6cb0_3	Plasmid	BSI	6229	49.24	ecoli	372	NA	NA	24	25	NA	NA	Col156_1	NA	MOBQ	-	-	mobilizable	PTU-E7	III	1	NA	NA	NA	2012-08-16	community	K84048	F	64	PRJNA604975	SAMN14345072
OX-BSI-57_2	1321227c-a885-4f7e-9953-5e8a958f6cb0	1321227c-a885-4f7e-9953-5e8a958f6cb0_2	Plasmid	BSI	131914	50.08	ecoli	372	NA	NA	2	100	NA	IS2,IS629,ISEc32	IncFIB(AP001918)_1,IncFII_1	sitA-BAC0349,sitB-BAC0350,sitC-BAC0351,sitD-BAC0352,smdB-BAC0354,tupC-BAC0607	MOBF	MPF_F	MOBF	conjugative	PTU-FE	III	0.9941	NA	NA	NA	2012-08-16	community	K84048	F	64	PRJNA604975	SAMN14345072
OX-BSI-58_1	135e7616-54ba-4aa7-aebb-09003f5b54a6	135e7616-54ba-4aa7-aebb-09003f5b54a6_chromo	Chromosome	BSI	5148774	50.46	ecoli	12	NA	NA	NA	NA	NA	IS150,IS1H,IS2,IS621,IS682,ISEc10,ISEc20,ISEc22,ISEc38,ISEc41,ISEc42,ISEc45,ISEc48,ISEc49,ISSd1	NA	acn-BAC0003,acrA-BAC0005,acrD/yffA-BAC0008,acrE/envC-BAC0009,acrF/envD-BAC0010,actP/yjcG-BAC0564,arsC-BAC0582,arsC-BAC0583,asr-BAC0038,baeS-BAC0040,bfrA-BAC0048,bhsA/ycfR/comC-BAC0049,comR/ycfQ-BAC0076,copA-BAC0725,corA-BAC0086,corB-BAC0643,corD-BAC0644,cpxA-BAC0532,cueO-BAC0103,cueR/ybbI-BAC0105,cusA/ybdE-BAC0107,cusB-BAC0108,cusC/ylcB-BAC0109,cusF/cusX-BAC0110,cusR/ylcA-BAC0111,cusS-BAC0112,cut…	NA	NA	NA	NA	NA	NA	NA	NA	NA	NA	2018-07-16	healthcare associated 31-365d	K84041	M	81	PRJNA604975	SAMN18263144
OX-BSI-58_2	135e7616-54ba-4aa7-aebb-09003f5b54a6	135e7616-54ba-4aa7-aebb-09003f5b54a6_2	Plasmid	BSI	138282	51.05	ecoli	12	NA	NA	5	68	aadA1,blaTEM-1,dfrA1,qacEdelta1,sul1	IS150,IS1X2,ISKpn26	Col156_1,IncFIA_1,IncFIB(pB171)_1_pB171,IncFII(pRSB107)_1_pRSB107	qacEdelta1-BAC0323	MOBF	MPF_F	MOBF	conjugative	PTU-FE	III	1	NA	NA	NA	2018-07-16	healthcare associated 31-365d	K84041	M	81	PRJNA604975	SAMN18263144
OX-BSI-58_3	135e7616-54ba-4aa7-aebb-09003f5b54a6	135e7616-54ba-4aa7-aebb-09003f5b54a6_3	Plasmid	BSI	2111	54.76	ecoli	12	NA	NA	NA	NA	NA	NA	Col(MP18)_1	NA	-	-	MOBP	mobilizable	-	-	1	NA	NA	NA	2018-07-16	healthcare associated 31-365d	K84041	M	81	PRJNA604975	SAMN18263144
OX-BSI-59_2	138d2644-15f2-430b-9edb-57681d785b88	138d2644-15f2-430b-9edb-57681d785b88_2	Plasmid	BSI	120849	52.57	ecoli	10	NA	NA	7	58	aadA1,aph(3'')-Ib,aph(6)-Id,dfrA1,qacEdelta1,sul1,sul2,tet(A)	IS1R,IS21,ISEc23	IncB/O/K/Z_3	blt-BAC0050,qacEdelta1-BAC0323	MOBP	MPF_I	MOBP	conjugative	PTU-B/O/K/Z	III	0.9545	NA	NA	NA	2010-12-17	healthcare associated 31-365d	K84045	M	79	PRJNA604975	SAMN18263142
OX-BSI-59_3	138d2644-15f2-430b-9edb-57681d785b88	138d2644-15f2-430b-9edb-57681d785b88_3	Plasmid	BSI	80590	52.48	ecoli	10	NA	NA	181	3	aac(3)-IId,blaTEM,blaTEM-1,mph(A)	IS6100,ISVsa5	IncFIC(FII)_1	NA	MOBF	MPF_F	MOBP	conjugative	PTU-FE	III	0.9941	NA	NA	NA	2010-12-17	healthcare associated 31-365d	K84045	M	79	PRJNA604975	SAMN18263142
OX-BSI-59_4	138d2644-15f2-430b-9edb-57681d785b88	138d2644-15f2-430b-9edb-57681d785b88_4	Plasmid	BSI	76347	51.6	ecoli	10	NA	NA	5	68	NA	IS100kyp,IS1A,IS26,ISEc10,ISKpn26	Col156_1,IncFIA_1	cpxR-BAC0533	MOBP	-	-	mobilizable	PTU-FE	III	1	NA	NA	NA	2010-12-17	healthcare associated 31-365d	K84045	M	79	PRJNA604975	SAMN18263142
OX-BSI-59_5	138d2644-15f2-430b-9edb-57681d785b88	138d2644-15f2-430b-9edb-57681d785b88_5	Plasmid	BSI	21771	49.06	ecoli	10	NA	NA	NA	NA	NA	NA	IncFII(pCRY)_1_pCRY	triA-BAC0396,triC-BAC0398	-	MPF_T	-	non-mobilizable	PTU-E73	IV	1	NA	NA	NA	2010-12-17	healthcare associated 31-365d	K84045	M	79	PRJNA604975	SAMN18263142
OX-BSI-59_1	138d2644-15f2-430b-9edb-57681d785b88	138d2644-15f2-430b-9edb-57681d785b88_chromo	Chromosome	BSI	5155315	50.89	ecoli	10	NA	NA	NA	NA	aac(3)-IId,aadA2,blaTEM-1,catA1,dfrA12,mph(A),qacEdelta1,qepA4,sul1	IS100kyp,IS150,IS1618,IS1A,IS1F,IS1R,IS30,IS609,IS6100,ISCfr1,ISEc26,ISEc38,ISEc5,ISEc8	NA	acn-BAC0003,acrA-BAC0005,acrB-BAC0006,acrD/yffA-BAC0008,acrE/envC-BAC0009,acrF/envD-BAC0010,actP/yjcG-BAC0564,arsB-BAC0576,arsC-BAC0583,arsC-BAC0584,arsR-BAC0594,asr-BAC0038,baeS-BAC0040,bfrA-BAC0048,bhsA/ycfR/comC-BAC0049,comR/ycfQ-BAC0076,copA-BAC0725,copS-BAC0752,corA-BAC0086,corB-BAC0643,corD-BAC0644,corR-BAC0089,cpxA-BAC0532,cueO-BAC0103,cueR/ybbI-BAC0105,cusA/ybdE-BAC0107,cusB-BAC0108,cusC/…	NA	NA	NA	NA	NA	NA	NA	NA	NA	NA	2010-12-17	healthcare associated 31-365d	K84045	M	79	PRJNA604975	SAMN18263142
OX-BSI-59_6	138d2644-15f2-430b-9edb-57681d785b88	138d2644-15f2-430b-9edb-57681d785b88_6	Plasmid	BSI	6646	51.61	ecoli	10	NA	NA	NA	NA	NA	NA	Col156_1	NA	MOBQ	-	MOBQ,MOBQ	mobilizable	PTU-E20	III	1	NA	NA	NA	2010-12-17	healthcare associated 31-365d	K84045	M	79	PRJNA604975	SAMN18263142
OX-BSI-60_1	13a4b49b-f57c-461a-9330-21d2a597eb54	13a4b49b-f57c-461a-9330-21d2a597eb54_chromo	Chromosome	BSI	4886613	50.57	ecoli	93	NA	NA	NA	NA	NA	IS100kyp,IS10L,IS150,IS1618,IS1B,IS30,ISEc26	NA	acn-BAC0003,acrA-BAC0005,acrB-BAC0006,acrD/yffA-BAC0008,acrE/envC-BAC0009,acrF/envD-BAC0010,acrR/ybaH-BAC0011,actP/yjcG-BAC0564,arsB-BAC0576,arsC-BAC0583,arsC-BAC0584,arsR-BAC0594,asr-BAC0038,baeS-BAC0040,bfrA-BAC0048,bhsA/ycfR/comC-BAC0049,comR/ycfQ-BAC0076,copA-BAC0725,corA-BAC0086,corB-BAC0643,corD-BAC0644,cpxA-BAC0532,cueO-BAC0103,cueR/ybbI-BAC0105,cusA/ybdE-BAC0107,cusB-BAC0108,cusC/ylcB-BAC…	NA	NA	NA	NA	NA	NA	NA	NA	NA	NA	2018-06-03	community	K84060	F	65	PRJNA604975	SAMN18263141
OX-BSI-60_2	13a4b49b-f57c-461a-9330-21d2a597eb54	13a4b49b-f57c-461a-9330-21d2a597eb54_2	Plasmid	BSI	101558	48.53	ecoli	93	NA	NA	2	100	aac(3)-IId,blaTEM-1,catA1,tet(B)	IS10L,IS2,IS629	IncFIB(AP001918)_1,IncFIC(FII)_1	blt-BAC0050,smdB-BAC0354,tupC-BAC0607	MOBF,MOBF,MOBP	MPF_F	MOBF	conjugative	PTU-FE	III	0.994	NA	NA	NA	2018-06-03	community	K84060	F	65	PRJNA604975	SAMN18263141
OX-BSI-60_4	13a4b49b-f57c-461a-9330-21d2a597eb54	13a4b49b-f57c-461a-9330-21d2a597eb54_4	Plasmid	BSI	2313	41.42	ecoli	93	NA	NA	96	6	NA	NA	Col(MG828)_1	NA	-	-	-	non-mobilizable	-	-	1	NA	NA	NA	2018-06-03	community	K84060	F	65	PRJNA604975	SAMN18263141
OX-BSI-60_3	13a4b49b-f57c-461a-9330-21d2a597eb54	13a4b49b-f57c-461a-9330-21d2a597eb54_3	Plasmid	BSI	45045	51.25	ecoli	93	NA	NA	NA	NA	NA	IS1203,IS1A	NA	fecE-BAC0164	-	-	-	non-mobilizable	-	-	1	NA	NA	NA	2018-06-03	community	K84060	F	65	PRJNA604975	SAMN18263141
OX-BSI-61_2	13b1854e-cd20-4325-bf06-072c2de1ea40	13b1854e-cd20-4325-bf06-072c2de1ea40_2	Plasmid	BSI	224365	51.11	kpneumoniae	490	NA	NA	19	33	NA	IS1A,IS1X4,IS903,ISEc21,ISEc36,ISKox1,ISKpn2,ISKpn21,ISKpn24,ISSen3	IncFIB(K)_1_Kpn3	copG-BAC0717,fecE-BAC0164,pcoA-BAC0303,pcoB-BAC0304,pcoC-BAC0305,pcoD-BAC0306,pcoE-BAC0307,pcoR-BAC0308,pcoS-BAC0309,pstB-BAC0316,silA-BAC0341,silB-BAC0342,silC-BAC0343,silE-BAC0344,silF-BAC0345,silP-BAC0346,silR-BAC0347,silS-BAC0348	-	-	-	non-mobilizable	PTU-E35	I	0.75	NA	NA	NA	2009-09-22	nosocomial	K83080	F	19	PRJNA604975	NA
OX-BSI-61_3	13b1854e-cd20-4325-bf06-072c2de1ea40	13b1854e-cd20-4325-bf06-072c2de1ea40_3	Plasmid	BSI	140168	52.85	kpneumoniae	490	14	15	13	41	aac(3)-IIe,aac(6')-Ib-cr5,aph(3'')-Ib,aph(6)-Id,blaCTX-M-15,blaOXA-1,blaTEM-1,catB3,dfrA14,qnrB1,sul2,tet(A)	IS102,IS5075,IS6100,ISEc9,ISKpn11,Tn5403	IncFII_1_pKP91	blt-BAC0050	MOBF,MOBF	MPF_F	-	conjugative	PTU-FK	III	0.9922	NA	NA	NA	2009-09-22	nosocomial	K83080	F	19	PRJNA604975	NA
OX-BSI-61_4	13b1854e-cd20-4325-bf06-072c2de1ea40	13b1854e-cd20-4325-bf06-072c2de1ea40_4	Plasmid	BSI	15409	45.55	kpneumoniae	490	3	19	20	32	NA	IS102,IS1X4,ISSen4	IncFIA(HI1)_1_HI1	NA	-	-	MOBF	mobilizable	-	-	1	NA	NA	NA	2009-09-22	nosocomial	K83080	F	19	PRJNA604975	NA
OX-BSI-61_5	13b1854e-cd20-4325-bf06-072c2de1ea40	13b1854e-cd20-4325-bf06-072c2de1ea40_5	Plasmid	BSI	9553	51.74	kpneumoniae	490	5	32	18	34	NA	Tn5403	NA	NA	MOBP	-	-	mobilizable	-	-	1	NA	NA	NA	2009-09-22	nosocomial	K83080	F	19	PRJNA604975	NA
OX-BSI-61_6	13b1854e-cd20-4325-bf06-072c2de1ea40	13b1854e-cd20-4325-bf06-072c2de1ea40_6	Plasmid	BSI	1697	44.49	kpneumoniae	490	NA	NA	26	23	NA	NA	NA	NA	-	-	-	non-mobilizable	-	-	1	NA	NA	NA	2009-09-22	nosocomial	K83080	F	19	PRJNA604975	NA
OX-BSI-61_1	13b1854e-cd20-4325-bf06-072c2de1ea40	13b1854e-cd20-4325-bf06-072c2de1ea40_chromo	Chromosome	BSI	5374580	57.38	kpneumoniae	490	NA	NA	NA	NA	blaSHV-1,fosA,oqxA,oqxB	IS5075,ISKpn26,Tn5403	NA	acn-BAC0003,acrA-BAC0005,acrB-BAC0006,acrC-BAC0007,acrD-BAC0563,acrE/envC-BAC0009,acrF/envD-BAC0010,actP/yjcG-BAC0564,adeE-BAC0013,arsB-BAC0578,arsC-BAC0582,arsC-BAC0583,arsR-BAC0589,baeR-BAC0596,baeS-BAC0040,bepG-BAC0046,bfrA-BAC0048,bhsA/ycfR/comC-BAC0049,cepA-BAC0061,comR/ycfQ-BAC0076,copA-BAC0725,corA-BAC0086,corB-BAC0643,corD-BAC0644,corR-BAC0089,cpxA-BAC0532,cueR/ybbI-BAC0105,cusA/ybdE-BAC0…	NA	NA	NA	NA	NA	NA	NA	NA	NA	NA	2009-09-22	nosocomial	K83080	F	19	PRJNA604975	NA
OX-BSI-62_3	13ecbd76-da32-4fc4-8d8d-ba85b71fd0a7	13ecbd76-da32-4fc4-8d8d-ba85b71fd0a7_3	Plasmid	BSI	6993	48.22	ecoli	73	NA	NA	116	5	NA	NA	ColRNAI_1	NA	MOBP	-	MOBP	mobilizable	PTU-E22	I	1	NA	NA	NA	2018-11-27	community	K84016	F	72	PRJNA604975	SAMN18263136
OX-BSI-62_4	13ecbd76-da32-4fc4-8d8d-ba85b71fd0a7	13ecbd76-da32-4fc4-8d8d-ba85b71fd0a7_4	Plasmid	BSI	4072	49.8	ecoli	73	NA	NA	9	51	NA	NA	Col8282_1	NA	MOBQ	-	MOBQ,MOBQ	mobilizable	PTU-E10	III	1	NA	NA	NA	2018-11-27	community	K84016	F	72	PRJNA604975	SAMN18263136
OX-BSI-62_2	13ecbd76-da32-4fc4-8d8d-ba85b71fd0a7	13ecbd76-da32-4fc4-8d8d-ba85b71fd0a7_2	Plasmid	BSI	145509	51.11	ecoli	73	NA	NA	15	38	aph(3'')-Ib,aph(6)-Id,blaTEM-1,mph(A),sul2	IS2,IS26,IS5075,IS6100,ISEc10,ISEc22,ISKpn26,Tn3	Col156_1,IncFIB(AP001918)_1,IncFIC(FII)_1	fecD-BAC0163,fecE-BAC0164	MOBF,MOBP	MPF_F	MOBF	conjugative	PTU-FE	III	1	NA	NA	NA	2018-11-27	community	K84016	F	72	PRJNA604975	SAMN18263136
OX-BSI-62_1	13ecbd76-da32-4fc4-8d8d-ba85b71fd0a7	13ecbd76-da32-4fc4-8d8d-ba85b71fd0a7_chromo	Chromosome	BSI	5175506	50.58	ecoli	73	NA	NA	NA	NA	blaEC-5	IS100kyp,IS1F,IS200C,IS5075,IS630,IS682,ISEc13,ISEc16,ISEc17,ISEc20,ISEc21,ISEc31,ISEc41,ISEc42	NA	acn-BAC0003,acrA-BAC0005,acrB-BAC0006,acrD/yffA-BAC0008,acrE/envC-BAC0009,acrF/envD-BAC0010,actP/yjcG-BAC0564,arsC-BAC0582,arsC-BAC0583,asr-BAC0038,baeS-BAC0040,bfrA-BAC0048,bhsA/ycfR/comC-BAC0049,comR/ycfQ-BAC0076,copA-BAC0725,corA-BAC0086,corB-BAC0643,corD-BAC0644,cpxA-BAC0532,cueO-BAC0103,cueR/ybbI-BAC0105,cusA/ybdE-BAC0107,cusB-BAC0108,cusC/ylcB-BAC0109,cusF/cusX-BAC0110,cusR/ylcA-BAC0111,cus…	NA	NA	NA	NA	NA	NA	NA	NA	NA	NA	2018-11-27	community	K84016	F	72	PRJNA604975	SAMN18263136
OX-BSI-63_2	14534de7-4a7b-469b-8451-5bda30ac96b6	14534de7-4a7b-469b-8451-5bda30ac96b6_2	Plasmid	BSI	158209	51.51	ecoli	58	NA	NA	2	100	aph(3'')-Ib,aph(6)-Id,blaTEM-1,dfrA5,sul2,tet(A)	IS2,IS629,ISEc12,ISEc23,ISEc32	IncFIB(AP001918)_1,IncFII_1	blt-BAC0050,merA-BAC0652,merC-BAC0664,merD-BAC0666,merE-BAC0670,merP-BAC0678,merR-BAC0232,merT-BAC0693,sitA-BAC0349,sitB-BAC0350,sitC-BAC0351,sitD-BAC0352,smdB-BAC0354,tupC-BAC0607	MOBF	MPF_F	MOBF	conjugative	PTU-FE	III	0.9172	NA	NA	NA	2018-09-04	healthcare associated 31-365d	K84613	F	97	PRJNA604975	SAMN18263133
OX-BSI-63_1	14534de7-4a7b-469b-8451-5bda30ac96b6	14534de7-4a7b-469b-8451-5bda30ac96b6_chromo	Chromosome	BSI	4950587	50.89	ecoli	58	NA	NA	NA	NA	NA	IS1H,IS629,ISCro1,ISEc18,ISEc21,ISEc26,ISEc38,ISEc8,ISKpn26,ISSd1,ISSfl8	NA	acn-BAC0003,acrA-BAC0005,acrB-BAC0006,acrD/yffA-BAC0008,acrE/envC-BAC0009,acrF/envD-BAC0010,actP/yjcG-BAC0564,arsB-BAC0576,arsC-BAC0583,arsC-BAC0584,arsP-BAC0036,arsR-BAC0594,asr-BAC0038,baeS-BAC0040,bfrA-BAC0048,bhsA/ycfR/comC-BAC0049,comR/ycfQ-BAC0076,copA-BAC0725,corA-BAC0086,corB-BAC0643,corD-BAC0644,cpxA-BAC0532,cueO-BAC0103,cueR/ybbI-BAC0105,cusA/ybdE-BAC0107,cusB-BAC0108,cusC/ylcB-BAC0109,…	NA	NA	NA	NA	NA	NA	NA	NA	NA	NA	2018-09-04	healthcare associated 31-365d	K84613	F	97	PRJNA604975	SAMN18263133
OX-BSI-64_3	14913dae-2ac7-412c-9097-36b0dab1916c	14913dae-2ac7-412c-9097-36b0dab1916c_3	Plasmid	BSI	6981	48.25	ecoli	73	NA	NA	116	5	NA	NA	ColRNAI_1	NA	MOBP	-	MOBP	mobilizable	PTU-E1	III	0.9878	NA	NA	NA	2018-04-19	healthcare associated 31-365d	K84002	F	84	PRJNA604975	SAMN18263132
OX-BSI-64_1	14913dae-2ac7-412c-9097-36b0dab1916c	14913dae-2ac7-412c-9097-36b0dab1916c_chromo	Chromosome	BSI	5136962	50.43	ecoli	73	NA	NA	NA	NA	NA	IS1351,IS1F,IS200C,IS4,IS630,IS682,ISEc1,ISEc13,ISEc16,ISEc17,ISEc20,ISEc21,ISEc39,ISEc41,ISEc42,ISEc43,ISEc48,ISEc49	NA	acn-BAC0003,acrA-BAC0005,acrD/yffA-BAC0008,acrE/envC-BAC0009,acrF/envD-BAC0010,actP/yjcG-BAC0564,arsC-BAC0582,arsC-BAC0583,asr-BAC0038,baeS-BAC0040,bfrA-BAC0048,bhsA/ycfR/comC-BAC0049,comR/ycfQ-BAC0076,copA-BAC0725,corA-BAC0086,corB-BAC0643,corD-BAC0644,cpxA-BAC0532,cueR/ybbI-BAC0105,cusA/ybdE-BAC0107,cusB-BAC0108,cusC/ylcB-BAC0109,cusF/cusX-BAC0110,cusR/ylcA-BAC0111,cusS-BAC0112,cutA-BAC0113,cut…	NA	NA	NA	NA	NA	NA	NA	NA	NA	NA	2018-04-19	healthcare associated 31-365d	K84002	F	84	PRJNA604975	SAMN18263132
OX-BSI-64_2	14913dae-2ac7-412c-9097-36b0dab1916c	14913dae-2ac7-412c-9097-36b0dab1916c_2	Plasmid	BSI	72981	50.94	ecoli	73	NA	NA	12	42	NA	IS186B,ISCro1	NA	NA	MOBF	MPF_F	MOBF	conjugative	PTU-FE	III	0.9112	NA	NA	NA	2018-04-19	healthcare associated 31-365d	K84002	F	84	PRJNA604975	SAMN18263132
OX-BSI-65_1	154e6100-6ca4-437e-933c-0e65384a6b65	154e6100-6ca4-437e-933c-0e65384a6b65_chromo	Chromosome	BSI	5495011	57.31	kpneumoniae	307	NA	NA	NA	NA	aac(3)-IIe,aac(6')-Ib-cr5,aph(3'')-Ib,aph(6)-Id,blaCTX-M-15,blaOXA-1,blaSHV-28,blaTEM-1,catB3,dfrA14,fosA,oqxA,oqxB19,sul2,tet(A)	IS102,IS1A,IS1F,IS1X3,IS5075,IS6100,IS903B,ISEc14,ISEc15,ISEc9,ISEcl1,ISKpn11,ISSen4	IncFIB(K)_1_Kpn3	acn-BAC0003,acrA-BAC0005,acrB-BAC0006,acrC-BAC0007,acrD-BAC0563,acrE/envC-BAC0009,acrF/envD-BAC0010,actP/yjcG-BAC0564,adeE-BAC0013,arsA-BAC0571,arsC-BAC0582,arsC-BAC0583,arsC-BAC0584,arsD-BAC0587,arsH-BAC0034,baeR-BAC0596,baeS-BAC0040,bepG-BAC0046,bfrA-BAC0048,bhsA/ycfR/comC-BAC0049,blt-BAC0050,cepA-BAC0061,comR/ycfQ-BAC0076,copA-BAC0725,copG-BAC0717,corA-BAC0086,corB-BAC0643,corD-BAC0644,corR-BA…	NA	NA	NA	NA	NA	NA	NA	NA	NA	NA	2013-08-13	nosocomial	K81073	M	63	PRJNA604975	NA
OX-BSI-66_4	16b8b4dd-bc5e-4fb1-9291-1c3a1a0d5787	16b8b4dd-bc5e-4fb1-9291-1c3a1a0d5787_4	Plasmid	BSI	5166	47.44	ecoli	69	NA	NA	4	69	NA	NA	Col156_1	NA	MOBQ	-	-	mobilizable	PTU-E7	III	1	NA	NA	NA	2018-03-02	community	K84030	F	81	PRJNA604975	SAMN18263117
OX-BSI-66_3	16b8b4dd-bc5e-4fb1-9291-1c3a1a0d5787	16b8b4dd-bc5e-4fb1-9291-1c3a1a0d5787_3	Plasmid	BSI	5627	47.06	ecoli	69	NA	NA	11	43	NA	NA	ColRNAI_1	NA	MOBP,MOBP	-	MOBP	mobilizable	PTU-E22	I	1	NA	NA	NA	2018-03-02	community	K84030	F	81	PRJNA604975	SAMN18263117
OX-BSI-66_2	16b8b4dd-bc5e-4fb1-9291-1c3a1a0d5787	16b8b4dd-bc5e-4fb1-9291-1c3a1a0d5787_2	Plasmid	BSI	153737	51.4	ecoli	69	NA	NA	NA	NA	aac(3)-IIe,blaTEM-1,tet(A)	IS2,IS3411,IS5,IS629,ISKpn11,ISKpn26,Tn3	Col156_1,IncFIB(AP001918)_1,IncFII(pCoo)_1_pCoo	blt-BAC0050,merA-BAC0652,merC-BAC0664,merD-BAC0666,merE-BAC0670,merP-BAC0678,merR-BAC0232,merT-BAC0693	MOBF	MPF_F	MOBF	conjugative	PTU-FE	III	1	NA	NA	NA	2018-03-02	community	K84030	F	81	PRJNA604975	SAMN18263117
OX-BSI-66_5	16b8b4dd-bc5e-4fb1-9291-1c3a1a0d5787	16b8b4dd-bc5e-4fb1-9291-1c3a1a0d5787_5	Plasmid	BSI	4072	49.8	ecoli	69	NA	NA	9	51	NA	NA	Col8282_1	NA	MOBQ	-	MOBQ,MOBQ	mobilizable	PTU-E10	III	1	NA	NA	NA	2018-03-02	community	K84030	F	81	PRJNA604975	SAMN18263117
OX-BSI-66_1	16b8b4dd-bc5e-4fb1-9291-1c3a1a0d5787	16b8b4dd-bc5e-4fb1-9291-1c3a1a0d5787_chromo	Chromosome	BSI	5156733	50.71	ecoli	69	NA	NA	NA	NA	NA	IS1203,IS1351,IS1F,IS30,IS911,ISEc10,ISEc17,ISEc22,ISEc38,ISEc43,ISEc45,ISEc46,ISEc8	NA	acn-BAC0003,acrA-BAC0005,acrB-BAC0006,acrD/yffA-BAC0008,acrE/envC-BAC0009,acrF/envD-BAC0010,actP/yjcG-BAC0564,arsA-BAC0571,arsB-BAC0576,arsC-BAC0582,arsC-BAC0583,arsD-BAC0587,arsP-BAC0036,arsR-BAC0594,asr-BAC0038,baeS-BAC0040,bfrA-BAC0048,bhsA/ycfR/comC-BAC0049,comR/ycfQ-BAC0076,copA-BAC0725,copS-BAC0752,corA-BAC0086,corB-BAC0643,corD-BAC0644,cpxA-BAC0532,cueO-BAC0103,cueR/ybbI-BAC0105,cusA/ybdE-…	NA	NA	NA	NA	NA	NA	NA	NA	NA	NA	2018-03-02	community	K84030	F	81	PRJNA604975	SAMN18263117
OX-BSI-66_6	16b8b4dd-bc5e-4fb1-9291-1c3a1a0d5787	16b8b4dd-bc5e-4fb1-9291-1c3a1a0d5787_6	Plasmid	BSI	3887	44.87	ecoli	69	NA	NA	NA	NA	NA	NA	ColRNAI_1	NA	-	-	MOB_unknown,MOBF,MOBP	mobilizable	PTU-E58	III	1	NA	NA	NA	2018-03-02	community	K84030	F	81	PRJNA604975	SAMN18263117
OX-BSI-67_3	16d44331-086e-4a5a-ade7-3a14d7bdcbcd	16d44331-086e-4a5a-ade7-3a14d7bdcbcd_3	Plasmid	BSI	5072	39.85	ecoli	73	NA	NA	NA	NA	NA	NA	NA	NA	-	-	-	non-mobilizable	-	-	1	NA	NA	NA	2018-01-11	nosocomial	K84617	F	86	PRJNA604975	SAMN18263116
OX-BSI-67_1	16d44331-086e-4a5a-ade7-3a14d7bdcbcd	16d44331-086e-4a5a-ade7-3a14d7bdcbcd_chromo	Chromosome	BSI	5121966	50.43	ecoli	73	NA	NA	NA	NA	blaEC-5	IS100kyp,IS1203,IS21,IS630,IS682,ISEc10,ISEc17,ISEc20,ISEc21,ISEc22,ISEc23,ISEc31,ISEc39,ISEc41,ISEc42,ISEc8	NA	acn-BAC0003,acrA-BAC0005,acrD/yffA-BAC0008,acrE/envC-BAC0009,acrF/envD-BAC0010,actP/yjcG-BAC0564,arsC-BAC0582,arsC-BAC0583,asr-BAC0038,baeS-BAC0040,bfrA-BAC0048,bhsA/ycfR/comC-BAC0049,comR/ycfQ-BAC0076,copA-BAC0725,copS-BAC0752,corA-BAC0086,corB-BAC0643,corD-BAC0644,cpxA-BAC0532,cueO-BAC0103,cueR/ybbI-BAC0105,cusA/ybdE-BAC0107,cusB-BAC0108,cusC/ylcB-BAC0109,cusF/cusX-BAC0110,cusR/ylcA-BAC0111,cus…	NA	NA	NA	NA	NA	NA	NA	NA	NA	NA	2018-01-11	nosocomial	K84617	F	86	PRJNA604975	SAMN18263116
OX-BSI-67_2	16d44331-086e-4a5a-ade7-3a14d7bdcbcd	16d44331-086e-4a5a-ade7-3a14d7bdcbcd_2	Plasmid	BSI	40997	42.32	ecoli	73	NA	NA	23	26	blaTEM-1	Tn3	NA	triA-BAC0396	MOBP	MPF_T	-	conjugative	PTU-X1	III	1	NA	NA	NA	2018-01-11	nosocomial	K84617	F	86	PRJNA604975	SAMN18263116
OX-BSI-68_4	16d8b1ce-be42-4067-b825-785b289665d2	16d8b1ce-be42-4067-b825-785b289665d2_4	Plasmid	BSI	1549	50.94	ecoli	131	NA	NA	8	57	NA	NA	Col(MG828)_1	NA	-	-	MOB_unknown,MOBP	mobilizable	PTU-E9	VI	1	NA	NA	NA	2018-09-06	healthcare associated 0-30d	K84025	F	66	PRJNA604975	SAMN18263115
OX-BSI-68_1	16d8b1ce-be42-4067-b825-785b289665d2	16d8b1ce-be42-4067-b825-785b289665d2_chromo	Chromosome	BSI	5071234	50.75	ecoli	131	NA	NA	NA	NA	aac(3)-IId,aadA2,blaTEM-1,dfrA12,mph(A),qacEdelta1,sul1,tet(A)	IS100kyp,IS1203,IS1F,IS200C,IS30,IS609,IS6100,ISCfr1,ISEc1,ISEc20,ISEc22,ISEc23,ISEc24,ISEc38,ISEc8,ISSd1	NA	acn-BAC0003,acrA-BAC0005,acrD/yffA-BAC0008,acrE/envC-BAC0009,acrF/envD-BAC0010,actP/yjcG-BAC0564,arsC-BAC0582,arsC-BAC0583,asr-BAC0038,baeS-BAC0040,bfrA-BAC0048,bhsA/ycfR/comC-BAC0049,blt-BAC0050,comR/ycfQ-BAC0076,copA-BAC0725,corA-BAC0086,corB-BAC0643,corD-BAC0644,cpxA-BAC0532,cueO-BAC0103,cueR/ybbI-BAC0105,cusA/ybdE-BAC0107,cusB-BAC0108,cusC/ylcB-BAC0109,cusF/cusX-BAC0110,cusR/ylcA-BAC0111,cusS…	NA	NA	NA	NA	NA	NA	NA	NA	NA	NA	2018-09-06	healthcare associated 0-30d	K84025	F	66	PRJNA604975	SAMN18263115
OX-BSI-68_3	16d8b1ce-be42-4067-b825-785b289665d2	16d8b1ce-be42-4067-b825-785b289665d2_3	Plasmid	BSI	106757	46.27	ecoli	131	NA	NA	27	23	NA	NA	NA	NA	-	-	-	non-mobilizable	PTU-E16	I	1	NA	NA	NA	2018-09-06	healthcare associated 0-30d	K84025	F	66	PRJNA604975	SAMN18263115
OX-BSI-68_2	16d8b1ce-be42-4067-b825-785b289665d2	16d8b1ce-be42-4067-b825-785b289665d2_2	Plasmid	BSI	114236	51.02	ecoli	131	NA	NA	1	123	NA	IS100kyp,IS21,IS26,ISEc10,ISEc53	Col156_1,IncFIB(AP001918)_1,IncFII(29)_1_pUTI89	NA	MOBF,MOBP	MPF_F	MOBF	conjugative	PTU-FE	III	1	NA	NA	NA	2018-09-06	healthcare associated 0-30d	K84025	F	66	PRJNA604975	SAMN18263115
OX-BSI-69_2	17a3c054-5a11-4a41-9f4c-cd992f5f5b0f_contig	17a3c054-5a11-4a41-9f4c-cd992f5f5b0f_contig_2	Plasmid	BSI	3190	47.08	ecoli	12	NA	NA	32	19	NA	NA	ColRNAI_1	NA	MOBF	-	MOB_unknown	mobilizable	PTU-E1	III	0.9861	NA	NA	NA	NA	NA	NA	NA	NA	PRJNA604975	SAMN18263106
OX-BSI-69_1	17a3c054-5a11-4a41-9f4c-cd992f5f5b0f_contig	17a3c054-5a11-4a41-9f4c-cd992f5f5b0f_contig_chromo	Chromosome	BSI	5075212	50.64	ecoli	12	NA	NA	NA	NA	NA	IS100kyp,IS1203,IS1397,IS1R,IS200C,IS26,IS621,IS682,ISEc13,ISEc16,ISEc20,ISEc31,ISEc40,ISEc41,ISEc42,ISSen4	NA	acn-BAC0003,acrA-BAC0005,acrD/yffA-BAC0008,acrE/envC-BAC0009,acrF/envD-BAC0010,actP/yjcG-BAC0564,arsC-BAC0582,arsC-BAC0583,asr-BAC0038,baeS-BAC0040,bfrA-BAC0048,bhsA/ycfR/comC-BAC0049,comR/ycfQ-BAC0076,copA-BAC0725,copS-BAC0752,corA-BAC0086,corB-BAC0643,corD-BAC0644,cpxA-BAC0532,cueO-BAC0103,cueR/ybbI-BAC0105,cusA/ybdE-BAC0107,cusB-BAC0108,cusC/ylcB-BAC0109,cusF/cusX-BAC0110,cusR/ylcA-BAC0111,cus…	NA	NA	NA	NA	NA	NA	NA	NA	NA	NA	NA	NA	NA	NA	NA	PRJNA604975	SAMN18263106
OX-BSI-70_2	17b57f0b-2d18-479e-998a-a7a0b8499cbe	17b57f0b-2d18-479e-998a-a7a0b8499cbe_2	Plasmid	BSI	134433	52.34	ecoli	12	NA	NA	5	68	aph(3'')-Ib,aph(3')-Ia,aph(6)-Id,blaTEM-1,sul2,tet(B)	IS1203,IS150,IS1A,IS1B,IS1X2,IS5,ISEc12	IncFIA_1,IncFIB(AP001918)_1,IncFII(pRSB107)_1_pRSB107	blt-BAC0050,iclR-BAC0196,merA-BAC0652,merC-BAC0664,merD-BAC0666,merE-BAC0670,merP-BAC0678,merR-BAC0232,merT-BAC0693,wtpC-BAC0604	MOBF	MPF_F	-	conjugative	PTU-FE	III	1	NA	NA	NA	2009-11-15	healthcare associated 0-30d	K84028	M	77	PRJNA604975	SAMN18263105
OX-BSI-70_3	17b57f0b-2d18-479e-998a-a7a0b8499cbe	17b57f0b-2d18-479e-998a-a7a0b8499cbe_3	Plasmid	BSI	40171	52.69	ecoli	12	NA	NA	NA	NA	NA	NA	NA	zraP-BAC0466,zraR/hydH-BAC0467,zraS/hydG-BAC0468	-	-	-	non-mobilizable	-	-	1	NA	NA	NA	2009-11-15	healthcare associated 0-30d	K84028	M	77	PRJNA604975	SAMN18263105
OX-BSI-70_1	17b57f0b-2d18-479e-998a-a7a0b8499cbe	17b57f0b-2d18-479e-998a-a7a0b8499cbe_chromo	Chromosome	BSI	5223018	50.4	ecoli	12	NA	NA	NA	NA	aadA1,dfrA1,sat2	IS100kyp,IS1A,IS1B,IS1R,IS200C,IS3411,IS621,IS682,ISEc13,ISEc16,ISEc20,ISEc22,ISEc40,ISEc41,ISEc42,ISEc48,ISEc49,ISSd1,ISSen4	NA	acn-BAC0003,acrA-BAC0005,acrE/envC-BAC0009,acrF/envD-BAC0010,actP/yjcG-BAC0564,arsC-BAC0582,arsC-BAC0583,asr-BAC0038,baeS-BAC0040,bfrA-BAC0048,bhsA/ycfR/comC-BAC0049,comR/ycfQ-BAC0076,copA-BAC0725,corA-BAC0086,corB-BAC0643,corD-BAC0644,cpxA-BAC0532,cueO-BAC0103,cueR/ybbI-BAC0105,cusA/ybdE-BAC0107,cusB-BAC0108,cusC/ylcB-BAC0109,cusF/cusX-BAC0110,cusR/ylcA-BAC0111,cusS-BAC0112,cutA-BAC0113,cutC-BAC…	NA	NA	NA	NA	NA	NA	NA	NA	NA	NA	2009-11-15	healthcare associated 0-30d	K84028	M	77	PRJNA604975	SAMN18263105
OX-BSI-71_1	17bfa93e-6d3a-445d-a2cc-84d2804d0a45	17bfa93e-6d3a-445d-a2cc-84d2804d0a45_chromo	Chromosome	BSI	4935034	50.66	ecoli	95	NA	NA	NA	NA	NA	IS1203,IS1397,IS150,IS200C,IS621,ISCro1,ISEc30,ISEc38,ISEc48,ISEhe3,ISSd1	NA	acn-BAC0003,acrA-BAC0005,acrB-BAC0006,acrD/yffA-BAC0008,acrE/envC-BAC0009,acrF/envD-BAC0010,actP/yjcG-BAC0564,arsC-BAC0582,arsC-BAC0583,asr-BAC0038,baeS-BAC0040,bfrA-BAC0048,bhsA/ycfR/comC-BAC0049,comR/ycfQ-BAC0076,copA-BAC0725,corA-BAC0086,corB-BAC0643,corD-BAC0644,cpxA-BAC0532,cueO-BAC0103,cueR/ybbI-BAC0105,cusA/ybdE-BAC0107,cusB-BAC0108,cusC/ylcB-BAC0109,cusF/cusX-BAC0110,cusR/ylcA-BAC0111,cus…	NA	NA	NA	NA	NA	NA	NA	NA	NA	NA	NA	NA	NA	NA	NA	PRJNA604975	NA
OX-BSI-71_2	17bfa93e-6d3a-445d-a2cc-84d2804d0a45	17bfa93e-6d3a-445d-a2cc-84d2804d0a45_2	Plasmid	BSI	136841	50.87	ecoli	95	225	2	2	100	blaTEM-1,dfrA5,tet(A)	IS2,IS629,ISEc32	IncFIB(AP001918)_1	blt-BAC0050,sitB-BAC0350,sitC-BAC0351,sitD-BAC0352,smdB-BAC0354,tupC-BAC0607	MOBF	MPF_F	MOBF	conjugative	PTU-FE	III	1	NA	NA	NA	NA	NA	NA	NA	NA	PRJNA604975	NA
OX-BSI-72_2	182589b8-4c14-4420-95f2-c2f2e224ce30	182589b8-4c14-4420-95f2-c2f2e224ce30_2	Plasmid	BSI	122593	50.78	ecoli	131	NA	NA	1	123	blaTEM-1	IS100kyp,IS1R,IS21,ISEc53	Col156_1,IncFIB(AP001918)_1,IncFII(29)_1_pUTI89	NA	MOBF,MOBP	MPF_F	MOBF	conjugative	PTU-FE	III	1	NA	NA	NA	2018-09-27	healthcare associated 31-365d	K84040	F	68	PRJNA604975	SAMN18263101
OX-BSI-72_1	182589b8-4c14-4420-95f2-c2f2e224ce30	182589b8-4c14-4420-95f2-c2f2e224ce30_chromo	Chromosome	BSI	5012645	50.81	ecoli	131	NA	NA	NA	NA	NA	IS100kyp,IS1397,IS150,IS609,ISEc1,ISEc10,ISEc20,ISEc24,ISEc38,ISEc40,ISEc8	NA	acn-BAC0003,acrA-BAC0005,acrD/yffA-BAC0008,acrE/envC-BAC0009,acrF/envD-BAC0010,actP/yjcG-BAC0564,arsC-BAC0582,arsC-BAC0583,asr-BAC0038,baeS-BAC0040,bfrA-BAC0048,bhsA/ycfR/comC-BAC0049,comR/ycfQ-BAC0076,copA-BAC0725,corA-BAC0086,corB-BAC0643,corD-BAC0644,cpxA-BAC0532,cueO-BAC0103,cueR/ybbI-BAC0105,cusA/ybdE-BAC0107,cusB-BAC0108,cusC/ylcB-BAC0109,cusF/cusX-BAC0110,cusR/ylcA-BAC0111,cusS-BAC0112,cut…	NA	NA	NA	NA	NA	NA	NA	NA	NA	NA	2018-09-27	healthcare associated 31-365d	K84040	F	68	PRJNA604975	SAMN18263101
OX-BSI-72_3	182589b8-4c14-4420-95f2-c2f2e224ce30	182589b8-4c14-4420-95f2-c2f2e224ce30_3	Plasmid	BSI	114057	51.77	ecoli	131	NA	NA	182	3	aph(3'')-Ib,aph(6)-Id,blaTEM-1,sul2	IS1203,ISEc23,ISEc47,Tn3	IncB/O/K/Z_2	pmrG-BAC0486	MOBP,MOBP	MPF_I	MOBP	conjugative	PTU-B/O/K/Z	III	1	NA	NA	NA	2018-09-27	healthcare associated 31-365d	K84040	F	68	PRJNA604975	SAMN18263101
OX-BSI-72_4	182589b8-4c14-4420-95f2-c2f2e224ce30	182589b8-4c14-4420-95f2-c2f2e224ce30_4	Plasmid	BSI	68095	50.76	ecoli	131	NA	NA	12	42	NA	NA	IncFII(pHN7A8)_1_pHN7A8	NA	MOBF	MPF_F	MOBF	conjugative	PTU-FE	III	1	NA	NA	NA	2018-09-27	healthcare associated 31-365d	K84040	F	68	PRJNA604975	SAMN18263101
OX-BSI-73_1	18adfcf3-15df-4a11-abb1-ec43d828d978	18adfcf3-15df-4a11-abb1-ec43d828d978_chromo	Chromosome	BSI	5049775	50.74	ecoli	131	NA	NA	NA	NA	NA	IS100kyp,IS1203,IS1F,IS2,IS200C,IS30,IS609,ISEc1,ISEc20,ISEc24,ISEc38,ISEc8,ISSd1,ISSen4	NA	acn-BAC0003,acrA-BAC0005,acrD/yffA-BAC0008,acrE/envC-BAC0009,acrF/envD-BAC0010,actP/yjcG-BAC0564,arsC-BAC0582,arsC-BAC0583,asr-BAC0038,baeS-BAC0040,bfrA-BAC0048,bhsA/ycfR/comC-BAC0049,comR/ycfQ-BAC0076,copA-BAC0725,corA-BAC0086,corB-BAC0643,corD-BAC0644,cpxA-BAC0532,cueO-BAC0103,cueR/ybbI-BAC0105,cusA/ybdE-BAC0107,cusB-BAC0108,cusC/ylcB-BAC0109,cusF/cusX-BAC0110,cusR/ylcA-BAC0111,cusS-BAC0112,cut…	NA	NA	NA	NA	NA	NA	NA	NA	NA	NA	2016-07-16	nosocomial	K84058	M	58	PRJNA604975	SAMN18263094
OX-BSI-73_2	18adfcf3-15df-4a11-abb1-ec43d828d978	18adfcf3-15df-4a11-abb1-ec43d828d978_2	Plasmid	BSI	110254	51.54	ecoli	131	194	2	5	68	aph(3'')-Ib,aph(6)-Id,blaCTX-M-27,sul2,tet(A)	IS100kyp,IS1A,IS1B,IS1X2,IS5,ISEc23	Col156_1,IncFIA_1,IncFIB(AP001918)_1,IncFII(pRSB107)_1_pRSB107	blt-BAC0050	MOBF,MOBP	MPF_F	-	conjugative	PTU-FE	III	1	NA	NA	NA	2016-07-16	nosocomial	K84058	M	58	PRJNA604975	SAMN18263094
OX-BSI-73_4	18adfcf3-15df-4a11-abb1-ec43d828d978	18adfcf3-15df-4a11-abb1-ec43d828d978_4	Plasmid	BSI	7939	41.63	ecoli	131	NA	NA	41	14	NA	NA	ColRNAI_1	NA	MOBP,MOBP,MOBP	-	MOBP	mobilizable	-	-	1	NA	NA	NA	2016-07-16	nosocomial	K84058	M	58	PRJNA604975	SAMN18263094
OX-BSI-73_3	18adfcf3-15df-4a11-abb1-ec43d828d978	18adfcf3-15df-4a11-abb1-ec43d828d978_3	Plasmid	BSI	33731	42.04	ecoli	131	195	2	97	6	NA	NA	IncX1_1	triA-BAC0396,triC-BAC0398	MOBP	MPF_T	-	conjugative	PTU-E80	IV	1	NA	NA	NA	2016-07-16	nosocomial	K84058	M	58	PRJNA604975	SAMN18263094
OX-BSI-73_6	18adfcf3-15df-4a11-abb1-ec43d828d978	18adfcf3-15df-4a11-abb1-ec43d828d978_6	Plasmid	BSI	1549	51	ecoli	131	18	7	8	57	NA	NA	Col(MG828)_1	NA	-	-	MOB_unknown,MOBP	mobilizable	PTU-E9	VI	1	NA	NA	NA	2016-07-16	nosocomial	K84058	M	58	PRJNA604975	SAMN18263094
OX-BSI-73_5	18adfcf3-15df-4a11-abb1-ec43d828d978	18adfcf3-15df-4a11-abb1-ec43d828d978_5	Plasmid	BSI	5167	47.51	ecoli	131	4	9	4	69	NA	NA	Col156_1	NA	MOBQ	-	-	mobilizable	PTU-E7	III	1	NA	NA	NA	2016-07-16	nosocomial	K84058	M	58	PRJNA604975	SAMN18263094
OX-BSI-74_2	192dbade-be69-489c-9d38-2d043ed51406	192dbade-be69-489c-9d38-2d043ed51406_2	Plasmid	BSI	133222	50.06	ecoli	95	NA	NA	2	100	NA	IS2,IS629,ISEc32	IncFIB(AP001918)_1,IncFII_1	sitA-BAC0349,sitB-BAC0350,sitC-BAC0351,sitD-BAC0352,smdB-BAC0354,tupC-BAC0607	MOBF	MPF_F	MOBF	conjugative	PTU-FE	III	0.9941	NA	NA	NA	NA	NA	NA	NA	NA	PRJNA604975	NA
OX-BSI-74_3	192dbade-be69-489c-9d38-2d043ed51406	192dbade-be69-489c-9d38-2d043ed51406_3	Plasmid	BSI	82704	53.22	ecoli	95	NA	NA	7	58	NA	NA	IncB/O/K/Z_2	NA	MOBP	MPF_I	MOBP	conjugative	PTU-B/O/K/Z	III	1	NA	NA	NA	NA	NA	NA	NA	NA	PRJNA604975	NA
OX-BSI-74_4	192dbade-be69-489c-9d38-2d043ed51406	192dbade-be69-489c-9d38-2d043ed51406_4	Plasmid	BSI	5631	47.4	ecoli	95	NA	NA	11	43	NA	NA	ColRNAI_1	NA	MOBP	-	MOBP	mobilizable	PTU-E22	I	1	NA	NA	NA	NA	NA	NA	NA	NA	PRJNA604975	NA
OX-BSI-74_1	192dbade-be69-489c-9d38-2d043ed51406	192dbade-be69-489c-9d38-2d043ed51406_chromo	Chromosome	BSI	4997692	50.57	ecoli	95	NA	NA	NA	NA	NA	IS100kyp,IS1203,IS1397,IS200C,IS621,ISEc20,ISEc30,ISEc38,ISEc40,ISEc45,ISEc48,ISEc8	NA	acn-BAC0003,acrA-BAC0005,acrD/yffA-BAC0008,acrE/envC-BAC0009,acrF/envD-BAC0010,actP/yjcG-BAC0564,arsC-BAC0582,arsC-BAC0583,asr-BAC0038,baeS-BAC0040,bfrA-BAC0048,bhsA/ycfR/comC-BAC0049,comR/ycfQ-BAC0076,copA-BAC0725,corA-BAC0086,corB-BAC0643,corD-BAC0644,cpxA-BAC0532,cueO-BAC0103,cueR/ybbI-BAC0105,cusA/ybdE-BAC0107,cusB-BAC0108,cusC/ylcB-BAC0109,cusF/cusX-BAC0110,cusR/ylcA-BAC0111,cusS-BAC0112,cut…	NA	NA	NA	NA	NA	NA	NA	NA	NA	NA	NA	NA	NA	NA	NA	PRJNA604975	NA
OX-BSI-75_2	198add03-e621-45b1-8caf-481ea2dcaaa4	198add03-e621-45b1-8caf-481ea2dcaaa4_2	Plasmid	BSI	92097	50.61	ecoli	131	NA	NA	5	68	tet(B)	IS100kyp,IS150,ISEc23,ISKpn26	IncFIA_1,IncFIB(pB171)_1_pB171	NA	-	MPF_F	MOBF	mobilizable	PTU-FE	III	1	NA	NA	NA	2018-01-17	community	K84017	M	84	PRJNA604975	SAMN18263086
OX-BSI-75_1	198add03-e621-45b1-8caf-481ea2dcaaa4	198add03-e621-45b1-8caf-481ea2dcaaa4_chromo	Chromosome	BSI	4867512	50.74	ecoli	131	NA	NA	NA	NA	blaTEM-1	IS1397,IS150,IS1X2,IS600,IS609,ISEc1,ISEc10,ISEc16,ISEc20,ISEc24,ISEc38,ISEc40,ISEc8,ISShdy2,Tn3	NA	acn-BAC0003,acrA-BAC0005,acrD/yffA-BAC0008,acrE/envC-BAC0009,acrF/envD-BAC0010,actP/yjcG-BAC0564,arsC-BAC0582,arsC-BAC0583,asr-BAC0038,baeS-BAC0040,bfrA-BAC0048,bhsA/ycfR/comC-BAC0049,comR/ycfQ-BAC0076,copA-BAC0725,corA-BAC0086,corB-BAC0643,corD-BAC0644,cpxA-BAC0532,cueO-BAC0103,cueR/ybbI-BAC0105,cusA/ybdE-BAC0107,cusB-BAC0108,cusC/ylcB-BAC0109,cusF/cusX-BAC0110,cusR/ylcA-BAC0111,cusS-BAC0112,cut…	NA	NA	NA	NA	NA	NA	NA	NA	NA	NA	2018-01-17	community	K84017	M	84	PRJNA604975	SAMN18263086
OX-BSI-76_3	19e32405-efa1-4b4a-a3e7-c5499dbeba59	19e32405-efa1-4b4a-a3e7-c5499dbeba59_3	Plasmid	BSI	4082	49.39	ecoli	69	NA	NA	21	29	NA	NA	Col8282_1	NA	MOBQ	-	MOBQ,MOBQ	mobilizable	PTU-E10	III	1	NA	NA	NA	2010-12-10	healthcare associated 31-365d	K82007	F	65	PRJNA604975	SAMN14345070
OX-BSI-76_2	19e32405-efa1-4b4a-a3e7-c5499dbeba59	19e32405-efa1-4b4a-a3e7-c5499dbeba59_2	Plasmid	BSI	141747	52.35	ecoli	69	NA	NA	1	123	aadA5,aph(3'')-Ib,aph(6)-Id,blaTEM-1,dfrA17,qacEdelta1,sul1,sul2	IS100kyp,IS1R,IS21,ISEc53	Col156_1,IncFIB(AP001918)_1,IncFII(29)_1_pUTI89	merA-BAC0652,merC-BAC0664,merD-BAC0666,merE-BAC0670,merP-BAC0678,merR-BAC0232,merT-BAC0693,qacEdelta1-BAC0323	MOBF,MOBP	MPF_F	MOBF	conjugative	PTU-FE	III	1	NA	NA	NA	2010-12-10	healthcare associated 31-365d	K82007	F	65	PRJNA604975	SAMN14345070
OX-BSI-76_1	19e32405-efa1-4b4a-a3e7-c5499dbeba59	19e32405-efa1-4b4a-a3e7-c5499dbeba59_chromo	Chromosome	BSI	5161098	50.69	ecoli	69	NA	NA	NA	NA	NA	IS1203,IS1351,IS1A,IS1F,IS2,IS30,IS911,ISEc22,ISEc38,ISEc43,ISEc45,ISEc46,ISEc8,ISKpn26	NA	acn-BAC0003,acrA-BAC0005,acrB-BAC0006,acrD/yffA-BAC0008,acrE/envC-BAC0009,acrF/envD-BAC0010,actP/yjcG-BAC0564,arsA-BAC0571,arsB-BAC0576,arsC-BAC0582,arsC-BAC0583,arsD-BAC0587,arsP-BAC0036,arsR-BAC0594,asr-BAC0038,baeS-BAC0040,bfrA-BAC0048,bhsA/ycfR/comC-BAC0049,comR/ycfQ-BAC0076,copA-BAC0725,copS-BAC0752,corA-BAC0086,corB-BAC0643,corD-BAC0644,corR-BAC0089,cpxA-BAC0532,cueO-BAC0103,cueR/ybbI-BAC01…	NA	NA	NA	NA	NA	NA	NA	NA	NA	NA	2010-12-10	healthcare associated 31-365d	K82007	F	65	PRJNA604975	SAMN14345070
OX-BSI-77_2	19e642f3-b6a3-4044-b4e5-e7e015bfcd2f	19e642f3-b6a3-4044-b4e5-e7e015bfcd2f_2	Plasmid	BSI	138793	47.11	ecoli	538	NA	NA	NA	NA	NA	IS1A,IS1F,IS2,ISEc11,ISEc16,ISEc18,ISEc32	IncFIB(AP001918)_1,IncFIC(FII)_1	smdB-BAC0354	MOBF,MOBP	MPF_F	MOBF	conjugative	-	-	1	NA	NA	NA	2018-09-24	community	K84011	M	79	PRJNA604975	SAMN18263084
OX-BSI-77_1	19e642f3-b6a3-4044-b4e5-e7e015bfcd2f	19e642f3-b6a3-4044-b4e5-e7e015bfcd2f_chromo	Chromosome	BSI	4629157	50.56	ecoli	538	NA	NA	NA	NA	NA	IS100kyp,IS1397,IS200C,ISEc1,ISEc20,ISEc38	NA	acn-BAC0003,acrA-BAC0005,acrD/yffA-BAC0008,acrE/envC-BAC0009,acrF/envD-BAC0010,actP/yjcG-BAC0564,arsC-BAC0582,arsC-BAC0583,asr-BAC0038,baeS-BAC0040,bfrA-BAC0048,bhsA/ycfR/comC-BAC0049,comR/ycfQ-BAC0076,copA-BAC0725,copS-BAC0752,corA-BAC0086,corB-BAC0643,corD-BAC0644,cpxA-BAC0532,cueO-BAC0103,cueR/ybbI-BAC0105,cusA/ybdE-BAC0107,cusB-BAC0108,cusC/ylcB-BAC0109,cusF/cusX-BAC0110,cusR/ylcA-BAC0111,cus…	NA	NA	NA	NA	NA	NA	NA	NA	NA	NA	2018-09-24	community	K84011	M	79	PRJNA604975	SAMN18263084
OX-BSI-78_2	1a0dface-0a19-410b-b9fb-18491f2d4dfb	1a0dface-0a19-410b-b9fb-18491f2d4dfb_2	Plasmid	BSI	194247	52.25	kpneumoniae	17	NA	NA	16	37	aph(3'')-Ib,aph(6)-Id,blaTEM-1,dfrA14,mph(A),sul2,tet(A)	IS1A,IS1S,IS6100,IS903,ISEc52,ISEhe3,ISSen4	IncFIB(K)_1_Kpn3,IncFII_1_pKP91	arsB-BAC0577,arsC-BAC0584,arsH-BAC0034,arsR-BAC0588,blt-BAC0050,copG-BAC0717,fecE-BAC0164,merD-BAC0666,merE-BAC0670,pcoA-BAC0303,pcoB-BAC0304,pcoC-BAC0305,pcoD-BAC0306,pcoE-BAC0307,pcoR-BAC0308,pcoS-BAC0309,pstB-BAC0316,silA-BAC0341,silB-BAC0342,silC-BAC0343,silE-BAC0344,silF-BAC0345,silP-BAC0346,silR-BAC0347,silS-BAC0348	MOBF,MOBF	MPF_F	-	conjugative	-	-	1	NA	NA	NA	2009-01-02	nosocomial	K82066	M	1	PRJNA604975	NA
OX-BSI-78_1	1a0dface-0a19-410b-b9fb-18491f2d4dfb	1a0dface-0a19-410b-b9fb-18491f2d4dfb_chromo	Chromosome	BSI	5300642	57.36	kpneumoniae	17	NA	NA	NA	NA	blaSHV-11,fosA,oqxA,oqxB25	IS1351	NA	acn-BAC0003,acrA-BAC0005,acrB-BAC0006,acrC-BAC0007,acrD-BAC0563,acrE/envC-BAC0009,acrF/envD-BAC0010,actP/yjcG-BAC0564,adeE-BAC0013,arsB-BAC0578,arsC-BAC0582,arsC-BAC0583,arsR-BAC0589,baeR-BAC0596,baeS-BAC0040,bepG-BAC0046,bfrA-BAC0048,bhsA/ycfR/comC-BAC0049,cepA-BAC0061,chrA-BAC0026,chrB-BAC0027,comR/ycfQ-BAC0076,copA-BAC0725,corA-BAC0086,corB-BAC0643,corD-BAC0644,corR-BAC0089,cpxA-BAC0532,cueR/y…	NA	NA	NA	NA	NA	NA	NA	NA	NA	NA	2009-01-02	nosocomial	K82066	M	1	PRJNA604975	NA
OX-BSI-79_1	1acb67a8-5af5-42d1-b21c-9930d7975397	1acb67a8-5af5-42d1-b21c-9930d7975397_chromo	Chromosome	BSI	4946982	50.59	ecoli	1406	NA	NA	NA	NA	NA	ISEc46	NA	acn-BAC0003,acrA-BAC0005,acrD/yffA-BAC0008,acrE/envC-BAC0009,acrF/envD-BAC0010,actP/yjcG-BAC0564,arsB-BAC0576,arsC-BAC0582,arsC-BAC0583,arsP-BAC0036,arsR-BAC0594,asr-BAC0038,baeS-BAC0040,bfrA-BAC0048,bhsA/ycfR/comC-BAC0049,comR/ycfQ-BAC0076,copA-BAC0725,copS-BAC0752,corA-BAC0086,corB-BAC0643,corC-BAC0088,corD-BAC0644,cpxA-BAC0532,cueO-BAC0103,cueR/ybbI-BAC0105,cusA/ybdE-BAC0107,cusB-BAC0108,cusC/…	NA	NA	NA	NA	NA	NA	NA	NA	NA	NA	2018-01-17	community	NA	M	40	PRJNA604975	SAMN18263079
OX-BSI-79_5	1acb67a8-5af5-42d1-b21c-9930d7975397	1acb67a8-5af5-42d1-b21c-9930d7975397_5	Plasmid	BSI	3823	43.37	ecoli	1406	NA	NA	NA	NA	NA	NA	Col440I_1	NA	-	-	MOBP	mobilizable	-	-	1	NA	NA	NA	2018-01-17	community	NA	M	40	PRJNA604975	SAMN18263079
OX-BSI-79_3	1acb67a8-5af5-42d1-b21c-9930d7975397	1acb67a8-5af5-42d1-b21c-9930d7975397_3	Plasmid	BSI	32100	41.37	ecoli	1406	NA	NA	43	14	NA	NA	IncX4_1	triA-BAC0396,triC-BAC0398	MOBP,MOBP	MPF_T	-	conjugative	PTU-X4	III	1	NA	NA	NA	2018-01-17	community	NA	M	40	PRJNA604975	SAMN18263079
OX-BSI-79_6	1acb67a8-5af5-42d1-b21c-9930d7975397	1acb67a8-5af5-42d1-b21c-9930d7975397_6	Plasmid	BSI	3188	47.21	ecoli	1406	NA	NA	NA	NA	NA	NA	ColRNAI_1	NA	-	-	MOB_unknown,MOBF,MOBP	mobilizable	-	-	1	NA	NA	NA	2018-01-17	community	NA	M	40	PRJNA604975	SAMN18263079
OX-BSI-79_4	1acb67a8-5af5-42d1-b21c-9930d7975397	1acb67a8-5af5-42d1-b21c-9930d7975397_4	Plasmid	BSI	5093	46.18	ecoli	1406	NA	NA	NA	NA	NA	NA	Col156_1	NA	MOBQ,MOBQ	-	-	mobilizable	PTU-E19	III	1	NA	NA	NA	2018-01-17	community	NA	M	40	PRJNA604975	SAMN18263079
OX-BSI-79_2	1acb67a8-5af5-42d1-b21c-9930d7975397	1acb67a8-5af5-42d1-b21c-9930d7975397_2	Plasmid	BSI	86087	50.15	ecoli	1406	NA	NA	3	73	NA	ISSbo1	IncI1_1_Alpha	pmrG-BAC0486	MOBP	MPF_I	MOBP	conjugative	PTU-I1	III	1	NA	NA	NA	2018-01-17	community	NA	M	40	PRJNA604975	SAMN18263079
OX-BSI-80_1	1c022b70-6af8-486c-94c8-02c1109758fe	1c022b70-6af8-486c-94c8-02c1109758fe_chromo	Chromosome	BSI	5267518	57.5	kpneumoniae	-	NA	NA	NA	NA	blaSHV-1,fosA,oqxA,oqxB25	IS1400,ISSty2	NA	acn-BAC0003,acrA-BAC0005,acrB-BAC0006,acrC-BAC0007,acrD-BAC0563,acrE/envC-BAC0009,acrF/envD-BAC0010,actP/yjcG-BAC0564,adeE-BAC0013,arsB-BAC0578,arsC-BAC0582,arsC-BAC0583,arsR-BAC0589,baeR-BAC0596,baeS-BAC0040,bepG-BAC0046,bfrA-BAC0048,bhsA/ycfR/comC-BAC0049,cepA-BAC0061,comR/ycfQ-BAC0076,copA-BAC0725,corA-BAC0086,corB-BAC0643,corD-BAC0644,cpxA-BAC0532,cueR/ybbI-BAC0105,cusA/ybdE-BAC0107,cusB-BAC0…	NA	NA	NA	NA	NA	NA	NA	NA	NA	NA	2009-11-20	community	K84039	M	67	PRJNA604975	NA
OX-BSI-81_2	1cb2f4ee-3073-4e12-8746-9a3f82c51ce0	1cb2f4ee-3073-4e12-8746-9a3f82c51ce0_2	Plasmid	BSI	253129	50.49	kpneumoniae	1966	NA	NA	183	3	NA	IS100kyp,IS1400,IS1S,ISEhe3,ISKpn2	IncFIB(K)_1_Kpn3,IncHI1B_1_pNDM-MAR	adeL-BAC0508,dsbC-BAC0138,emrAsm-BAC0499,nfsA-BAC0540,nikD-BAC0273,pstB-BAC0316,terA-BAC0386,terB-BAC0387,terC-BAC0388,terE-BAC0390,terW-BAC0391,terZ-BAC0392,vceC-BAC0420,ybtP-BAC0432,ybtQ-BAC0433	MOBH	MPF_F	-	conjugative	-	-	1	NA	NA	NA	2018-11-22	healthcare associated 31-365d	K84002	M	77	PRJNA604975	NA
OX-BSI-81_1	1cb2f4ee-3073-4e12-8746-9a3f82c51ce0	1cb2f4ee-3073-4e12-8746-9a3f82c51ce0_chromo	Chromosome	BSI	5275089	57.23	kpneumoniae	1966	NA	NA	NA	NA	blaSHV-27,fosA,oqxA,oqxB	IS1351,IS2,IS630,ISKox1,ISKpn2	NA	acn-BAC0003,acrA-BAC0005,acrB-BAC0006,acrC-BAC0007,acrD-BAC0563,acrE/envC-BAC0009,acrF/envD-BAC0010,actP/yjcG-BAC0564,adeE-BAC0013,arsB-BAC0578,arsC-BAC0582,arsC-BAC0583,arsR-BAC0589,baeR-BAC0596,baeS-BAC0040,bepG-BAC0046,bfrA-BAC0048,bhsA/ycfR/comC-BAC0049,cepA-BAC0061,chrA-BAC0026,chrB-BAC0027,comR/ycfQ-BAC0076,copA-BAC0725,corA-BAC0086,corB-BAC0643,corD-BAC0644,corR-BAC0089,cpxA-BAC0532,cueR/y…	NA	NA	NA	NA	NA	NA	NA	NA	NA	NA	2018-11-22	healthcare associated 31-365d	K84002	M	77	PRJNA604975	NA
OX-BSI-82_3	1ceef0f1-fe05-4a23-bdc0-22aca386db89	1ceef0f1-fe05-4a23-bdc0-22aca386db89_3	Plasmid	BSI	3348	46.48	ecoli	73	NA	NA	NA	NA	NA	NA	NA	NA	MOBV	-	-	mobilizable	-	-	1	NA	NA	NA	2018-04-09	community	K84023	F	87	PRJNA604975	SAMN18263061
OX-BSI-82_1	1ceef0f1-fe05-4a23-bdc0-22aca386db89	1ceef0f1-fe05-4a23-bdc0-22aca386db89_chromo	Chromosome	BSI	5250369	50.39	ecoli	73	NA	NA	NA	NA	blaEC-5	IS100kyp,IS1203,IS150,IS1A,IS200C,IS21,IS630,IS682,ISEc13,ISEc16,ISEc17,ISEc20,ISEc21,ISEc23,ISEc31,ISEc39,ISEc41,ISEc42,ISEc8	NA	acn-BAC0003,acrA-BAC0005,acrD/yffA-BAC0008,acrE/envC-BAC0009,acrF/envD-BAC0010,actP/yjcG-BAC0564,arsC-BAC0582,arsC-BAC0583,asr-BAC0038,baeS-BAC0040,bfrA-BAC0048,bhsA/ycfR/comC-BAC0049,comR/ycfQ-BAC0076,copA-BAC0725,copS-BAC0752,corA-BAC0086,corB-BAC0643,corD-BAC0644,cpxA-BAC0532,cueO-BAC0103,cueR/ybbI-BAC0105,cusA/ybdE-BAC0107,cusB-BAC0108,cusC/ylcB-BAC0109,cusF/cusX-BAC0110,cusR/ylcA-BAC0111,cus…	NA	NA	NA	NA	NA	NA	NA	NA	NA	NA	2018-04-09	community	K84023	F	87	PRJNA604975	SAMN18263061
OX-BSI-82_2	1ceef0f1-fe05-4a23-bdc0-22aca386db89	1ceef0f1-fe05-4a23-bdc0-22aca386db89_2	Plasmid	BSI	133174	52.73	ecoli	73	NA	NA	5	68	aadA1,aph(3'')-Ib,aph(6)-Id,blaTEM-1,dfrA1,qacEdelta1,sul1,sul2	IS1203,IS150,IS1A,IS1B,IS1X2,IS5,ISEc12	IncFIA_1,IncFIB(AP001918)_1,IncFII(pRSB107)_1_pRSB107	iclR-BAC0196,merA-BAC0652,merC-BAC0664,merD-BAC0666,merE-BAC0670,merP-BAC0678,merR-BAC0232,merT-BAC0693,qacEdelta1-BAC0323,wtpC-BAC0604	MOBF	MPF_F	MOBF	conjugative	PTU-FE	III	0.75	NA	NA	NA	2018-04-09	community	K84023	F	87	PRJNA604975	SAMN18263061
OX-BSI-82_4	1ceef0f1-fe05-4a23-bdc0-22aca386db89	1ceef0f1-fe05-4a23-bdc0-22aca386db89_4	Plasmid	BSI	1546	51.49	ecoli	73	23	5	29	21	NA	NA	Col(MG828)_1	NA	-	-	MOB_unknown,MOBP	mobilizable	PTU-E9	VI	1	NA	NA	NA	2018-04-09	community	K84023	F	87	PRJNA604975	SAMN18263061
OX-BSI-83_2	1d272145-4d1f-417e-b67a-39b60e1e815b	1d272145-4d1f-417e-b67a-39b60e1e815b_2	Plasmid	BSI	135063	50.36	ecoli	131	NA	NA	140	4	aac(3)-IIe,aac(6')-Ib-cr5,blaCTX-M-15,blaOXA-1,catB3	IS1B,IS2,IS5,ISEc9,ISKpn11,ISSm1,Tn5403	IncFIA_1,IncFIB(AP001918)_1,IncFIC(FII)_1	NA	MOBF	MPF_F	-	conjugative	PTU-FE	III	0.9941	NA	NA	NA	2014-08-14	nosocomial	K82047	F	82	PRJNA604975	NA
OX-BSI-83_3	1d272145-4d1f-417e-b67a-39b60e1e815b	1d272145-4d1f-417e-b67a-39b60e1e815b_3	Plasmid	BSI	5631	47.38	ecoli	131	NA	NA	11	43	NA	NA	ColRNAI_1	NA	MOBP	-	MOBP	mobilizable	PTU-E22	I	1	NA	NA	NA	2014-08-14	nosocomial	K82047	F	82	PRJNA604975	NA
OX-BSI-83_4	1d272145-4d1f-417e-b67a-39b60e1e815b	1d272145-4d1f-417e-b67a-39b60e1e815b_4	Plasmid	BSI	4071	51.46	ecoli	131	NA	NA	47	13	NA	NA	NA	NA	MOBQ	-	MOBQ,MOBQ	mobilizable	PTU-E10	III	1	NA	NA	NA	2014-08-14	nosocomial	K82047	F	82	PRJNA604975	NA
OX-BSI-83_5	1d272145-4d1f-417e-b67a-39b60e1e815b	1d272145-4d1f-417e-b67a-39b60e1e815b_5	Plasmid	BSI	1552	51.8	ecoli	131	NA	NA	6	62	NA	NA	Col(MG828)_1	NA	-	-	MOB_unknown	mobilizable	PTU-E9	VI	1	NA	NA	NA	2014-08-14	nosocomial	K82047	F	82	PRJNA604975	NA
OX-BSI-83_1	1d272145-4d1f-417e-b67a-39b60e1e815b	1d272145-4d1f-417e-b67a-39b60e1e815b_chromo	Chromosome	BSI	4950890	50.74	ecoli	131	NA	NA	NA	NA	NA	IS100kyp,IS1203,IS1F,IS2,IS200C,IS30,IS4,IS609,ISEc1,ISEc10,ISEc20,ISEc24,ISEc30,ISEc38,ISEc53,ISEc8,ISSd1	NA	acn-BAC0003,acrA-BAC0005,acrD/yffA-BAC0008,acrE/envC-BAC0009,acrF/envD-BAC0010,actP/yjcG-BAC0564,arsC-BAC0582,arsC-BAC0583,asr-BAC0038,baeS-BAC0040,bfrA-BAC0048,bhsA/ycfR/comC-BAC0049,comR/ycfQ-BAC0076,copA-BAC0725,corA-BAC0086,corB-BAC0643,corD-BAC0644,cpxA-BAC0532,cueO-BAC0103,cueR/ybbI-BAC0105,cusA/ybdE-BAC0107,cusB-BAC0108,cusC/ylcB-BAC0109,cusF/cusX-BAC0110,cusR/ylcA-BAC0111,cusS-BAC0112,cut…	NA	NA	NA	NA	NA	NA	NA	NA	NA	NA	2014-08-14	nosocomial	K82047	F	82	PRJNA604975	NA
OX-BSI-84_1	1da3b6f0-e0b6-4f45-8415-2d75fb6c4102	1da3b6f0-e0b6-4f45-8415-2d75fb6c4102_chromo	Chromosome	BSI	5180036	50.37	ecoli	73	NA	NA	NA	NA	blaEC-5	IS100kyp,IS1203,IS1R,IS200C,IS21,IS30,IS630,IS682,ISEc10,ISEc13,ISEc16,ISEc17,ISEc20,ISEc21,ISEc31,ISEc39,ISEc41,ISEc42,ISEc8,ISSd1	NA	acn-BAC0003,acrA-BAC0005,acrD/yffA-BAC0008,acrE/envC-BAC0009,acrF/envD-BAC0010,actP/yjcG-BAC0564,arsC-BAC0582,arsC-BAC0583,asr-BAC0038,baeS-BAC0040,bfrA-BAC0048,bhsA/ycfR/comC-BAC0049,comR/ycfQ-BAC0076,copA-BAC0725,corA-BAC0086,corB-BAC0643,corD-BAC0644,cpxA-BAC0532,cueO-BAC0103,cueR/ybbI-BAC0105,cusA/ybdE-BAC0107,cusB-BAC0108,cusC/ylcB-BAC0109,cusF/cusX-BAC0110,cusR/ylcA-BAC0111,cusS-BAC0112,cut…	NA	NA	NA	NA	NA	NA	NA	NA	NA	NA	2009-05-22	healthcare associated 31-365d	K84007	F	0	PRJNA604975	SAMN18263055
OX-BSI-84_3	1da3b6f0-e0b6-4f45-8415-2d75fb6c4102	1da3b6f0-e0b6-4f45-8415-2d75fb6c4102_3	Plasmid	BSI	2102	47.15	ecoli	73	NA	NA	22	29	NA	NA	Col(BS512)_1	NA	-	-	-	non-mobilizable	PTU-E47	III	1	NA	NA	NA	2009-05-22	healthcare associated 31-365d	K84007	F	0	PRJNA604975	SAMN18263055
OX-BSI-84_2	1da3b6f0-e0b6-4f45-8415-2d75fb6c4102	1da3b6f0-e0b6-4f45-8415-2d75fb6c4102_2	Plasmid	BSI	112155	50.63	ecoli	73	NA	NA	5	68	blaTEM-1,tet(B)	IS1203,IS150,IS1A,IS26,ISVsa5,Tn3,Tn5403	IncFIA_1,IncFIB(AP001918)_1,IncFII(pRSB107)_1_pRSB107	blt-BAC0050,iclR-BAC0196,wtpC-BAC0604	-	MPF_F	MOBF	mobilizable	PTU-FE	III	0.9882	NA	NA	NA	2009-05-22	healthcare associated 31-365d	K84007	F	0	PRJNA604975	SAMN18263055
OX-BSI-84_4	1da3b6f0-e0b6-4f45-8415-2d75fb6c4102	1da3b6f0-e0b6-4f45-8415-2d75fb6c4102_4	Plasmid	BSI	1552	51.8	ecoli	73	9	5	6	62	NA	NA	Col(MG828)_1	NA	-	-	MOB_unknown	mobilizable	PTU-E9	VI	1	NA	NA	NA	2009-05-22	healthcare associated 31-365d	K84007	F	0	PRJNA604975	SAMN18263055
OX-BSI-85_2	1e7672fc-0db5-49bc-a3e7-2424157e6278	1e7672fc-0db5-49bc-a3e7-2424157e6278_2	Plasmid	BSI	118650	51.58	ecoli	73	32	4	15	38	aadA1,blaSHV-1,qacEdelta1,sul1	IS1R,ISEc10,ISKpn26	Col156_1,IncFIB(AP001918)_1,IncFIC(FII)_1	qacEdelta1-BAC0323	MOBF,MOBP	MPF_F	MOBF	conjugative	PTU-FE	III	1	NA	NA	NA	2018-04-19	healthcare associated 31-365d	K84047	F	88	PRJNA604975	SAMN18263049
OX-BSI-85_1	1e7672fc-0db5-49bc-a3e7-2424157e6278	1e7672fc-0db5-49bc-a3e7-2424157e6278_chromo	Chromosome	BSI	5144951	50.47	ecoli	73	NA	NA	NA	NA	blaEC-5	IS1203,IS200C,IS30,IS629,IS630,IS682,ISEc13,ISEc16,ISEc20,ISEc39,ISEc41,ISEc42,ISEc45,ISSfl8	NA	acn-BAC0003,acrA-BAC0005,acrD/yffA-BAC0008,acrE/envC-BAC0009,acrF/envD-BAC0010,actP/yjcG-BAC0564,arsC-BAC0582,arsC-BAC0583,asr-BAC0038,baeS-BAC0040,bfrA-BAC0048,bhsA/ycfR/comC-BAC0049,comR/ycfQ-BAC0076,copA-BAC0725,corA-BAC0086,corB-BAC0643,corC-BAC0088,corD-BAC0644,cpxA-BAC0532,cueO-BAC0103,cueR/ybbI-BAC0105,cusA/ybdE-BAC0107,cusB-BAC0108,cusC/ylcB-BAC0109,cusF/cusX-BAC0110,cusR/ylcA-BAC0111,cus…	NA	NA	NA	NA	NA	NA	NA	NA	NA	NA	2018-04-19	healthcare associated 31-365d	K84047	F	88	PRJNA604975	SAMN18263049
OX-BSI-86_5	1ebd9494-939c-4054-9d15-55b9eabe4f9f	1ebd9494-939c-4054-9d15-55b9eabe4f9f_5	Plasmid	BSI	4512	44.95	kpneumoniae	54	NA	NA	141	4	NA	NA	Col440I_1	NA	-	-	-	non-mobilizable	PTU-E71	III	1	NA	NA	NA	2014-04-06	healthcare associated 0-30d	K84009	M	77	PRJNA604975	NA
OX-BSI-86_2	1ebd9494-939c-4054-9d15-55b9eabe4f9f	1ebd9494-939c-4054-9d15-55b9eabe4f9f_2	Plasmid	BSI	267175	50.42	kpneumoniae	54	NA	NA	NA	NA	NA	IS1400,IS1F,IS2,IS4321R,IS903,ISEc21,ISEc8,ISKox1,ISKpn21,ISKpn28,ISSen4	IncFIB(K)_1_Kpn3	arsB-BAC0577,arsC-BAC0584,arsH-BAC0034,arsR-BAC0588,copG-BAC0717,dsbC-BAC0138,fecE-BAC0164,pcoA-BAC0303,pcoB-BAC0304,pcoC-BAC0305,pcoD-BAC0306,pcoE-BAC0307,pcoR-BAC0308,pcoS-BAC0309,pstB-BAC0316,silA-BAC0341,silB-BAC0342,silC-BAC0343,silE-BAC0344,silF-BAC0345,silP-BAC0346,silR-BAC0347,silS-BAC0348,terA-BAC0386,terB-BAC0387,terC-BAC0388,terE-BAC0390,terW-BAC0391,terZ-BAC0392	MOBH	MPF_F	-	conjugative	PTU-E60	II	1	NA	NA	NA	2014-04-06	healthcare associated 0-30d	K84009	M	77	PRJNA604975	NA
OX-BSI-86_3	1ebd9494-939c-4054-9d15-55b9eabe4f9f	1ebd9494-939c-4054-9d15-55b9eabe4f9f_3	Plasmid	BSI	132149	52.73	kpneumoniae	54	NA	NA	13	41	aac(3)-IIe,aac(6')-Ib-cr5,aph(3'')-Ib,aph(6)-Id,blaCTX-M-15,blaOXA-1,blaTEM,catB3,dfrA14,qnrB1,sul2,tet(A)	IS102,IS5075,IS6100,ISEc9,ISKpn11,Tn5403	IncFII_1_pKP91	blt-BAC0050	MOBF,MOBF	MPF_F	-	conjugative	PTU-FK	III	0.9922	NA	NA	NA	2014-04-06	healthcare associated 0-30d	K84009	M	77	PRJNA604975	NA
OX-BSI-86_4	1ebd9494-939c-4054-9d15-55b9eabe4f9f	1ebd9494-939c-4054-9d15-55b9eabe4f9f_4	Plasmid	BSI	70837	52.82	kpneumoniae	54	NA	NA	NA	NA	NA	IS4321R,ISEas1,ISEc8,ISKpn26	IncR_1	NA	-	-	-	non-mobilizable	-	-	1	NA	NA	NA	2014-04-06	healthcare associated 0-30d	K84009	M	77	PRJNA604975	NA
OX-BSI-86_6	1ebd9494-939c-4054-9d15-55b9eabe4f9f	1ebd9494-939c-4054-9d15-55b9eabe4f9f_6	Plasmid	BSI	4096	55.52	kpneumoniae	54	NA	NA	48	13	NA	NA	Col440I_1,Col440II_1	NA	MOBP,MOBP	-	MOBP	mobilizable	PTU-E3	V	0.9104	NA	NA	NA	2014-04-06	healthcare associated 0-30d	K84009	M	77	PRJNA604975	NA
OX-BSI-86_1	1ebd9494-939c-4054-9d15-55b9eabe4f9f	1ebd9494-939c-4054-9d15-55b9eabe4f9f_chromo	Chromosome	BSI	5225047	57.44	kpneumoniae	54	NA	NA	NA	NA	blaSHV-11,fosA,oqxA,oqxB25	IS1400,IS1X2,ISEc8,ISKpn21,ISKpn26,ISKpn28,ISSen4	NA	acn-BAC0003,acrA-BAC0005,acrB-BAC0006,acrC-BAC0007,acrD-BAC0563,acrE/envC-BAC0009,acrF/envD-BAC0010,actP/yjcG-BAC0564,adeE-BAC0013,arsB-BAC0578,arsC-BAC0582,arsC-BAC0583,arsR-BAC0589,baeR-BAC0596,baeS-BAC0040,bfrA-BAC0048,bhsA/ycfR/comC-BAC0049,cepA-BAC0061,chrA-BAC0026,chrB-BAC0027,comR/ycfQ-BAC0076,copA-BAC0725,copS-BAC0637,corA-BAC0086,corB-BAC0643,corD-BAC0644,corR-BAC0089,cpxA-BAC0532,cueR/y…	NA	NA	NA	NA	NA	NA	NA	NA	NA	NA	2014-04-06	healthcare associated 0-30d	K84009	M	77	PRJNA604975	NA
OX-BSI-87_1	1ed9ba5c-5d7a-405d-aed7-8457aeb82f3d_contig	1ed9ba5c-5d7a-405d-aed7-8457aeb82f3d_contig_chromo	Chromosome	BSI	4824885	50.67	ecoli	297	NA	NA	NA	NA	NA	IS1F,IS1H,ISEc16,ISEc17,ISEc38,ISShdy2	NA	acn-BAC0003,acrA-BAC0005,acrB-BAC0006,acrD/yffA-BAC0008,acrE/envC-BAC0009,acrF/envD-BAC0010,actP/yjcG-BAC0564,arsB-BAC0576,arsC-BAC0583,arsC-BAC0584,arsP-BAC0036,arsR-BAC0594,asr-BAC0038,baeS-BAC0040,bfrA-BAC0048,bhsA/ycfR/comC-BAC0049,comR/ycfQ-BAC0076,copA-BAC0725,copS-BAC0752,corA-BAC0086,corB-BAC0643,corD-BAC0644,cpxA-BAC0532,cueO-BAC0103,cueR/ybbI-BAC0105,cusA/ybdE-BAC0107,cusB-BAC0108,cusC/…	NA	NA	NA	NA	NA	NA	NA	NA	NA	NA	NA	NA	NA	NA	NA	PRJNA604975	SAMN18263045
OX-BSI-87_2	1ed9ba5c-5d7a-405d-aed7-8457aeb82f3d_contig	1ed9ba5c-5d7a-405d-aed7-8457aeb82f3d_contig_2	Plasmid	BSI	201057	49.58	ecoli	297	NA	NA	2	100	NA	IS100kyp,IS1203,IS1X4,IS30,ISEc32	IncFIB(AP001918)_1,IncFIC(FII)_1	fecE-BAC0164,sitA-BAC0349,sitB-BAC0350,sitC-BAC0351,sitD-BAC0352,smdB-BAC0354,tupC-BAC0607	MOBF,MOBP	MPF_F	MOBF	conjugative	PTU-FE	III	0.9941	NA	NA	NA	NA	NA	NA	NA	NA	PRJNA604975	SAMN18263045
OX-BSI-88_4	1f0092db-aa6d-4476-81c5-935dfd952c29_contig	1f0092db-aa6d-4476-81c5-935dfd952c29_contig_4	Plasmid	BSI	3548	54.34	koxytoca	213	NA	NA	53	11	NA	NA	Col440I_1,Col440II_1	NA	MOBP,MOBP,MOBP	-	MOBP	mobilizable	PTU-E3	V	0.9265	NA	NA	NA	NA	NA	NA	NA	NA	PRJNA604975	NA
OX-BSI-88_5	1f0092db-aa6d-4476-81c5-935dfd952c29_contig	1f0092db-aa6d-4476-81c5-935dfd952c29_contig_5	Plasmid	BSI	2493	51.5	koxytoca	213	NA	NA	28	21	NA	NA	ColRNAI_1	NA	-	-	MOB_unknown	mobilizable	-	-	1	NA	NA	NA	NA	NA	NA	NA	NA	PRJNA604975	NA
OX-BSI-88_2	1f0092db-aa6d-4476-81c5-935dfd952c29_contig	1f0092db-aa6d-4476-81c5-935dfd952c29_contig_2	Plasmid	BSI	228255	51.27	koxytoca	213	NA	NA	NA	NA	NA	IS102,IS1X2,IS1X4,ISEc21,ISEc36,ISKpn2,ISKpn21,ISSen4,Tn5403	IncFIB(K)_1_Kpn3,IncFII(pKPX1)	copG-BAC0717,mdeA-BAC0207,merA-BAC0652,merD-BAC0666,merE-BAC0672,merF-BAC0228,merP-BAC0231,merR2-BAC0688,merT-BAC0691,pcoA-BAC0303,pcoB-BAC0304,pcoC-BAC0305,pcoD-BAC0306,pcoE-BAC0307,pcoR-BAC0308,pcoS-BAC0309,pstB-BAC0316,silA-BAC0341,silB-BAC0342,silC-BAC0343,silE-BAC0344,silF-BAC0345,silP-BAC0346,silR-BAC0347,silS-BAC0348	MOBP	MPF_I	-	conjugative	PTU-E25	III	1	NA	NA	NA	NA	NA	NA	NA	NA	PRJNA604975	NA
OX-BSI-88_3	1f0092db-aa6d-4476-81c5-935dfd952c29_contig	1f0092db-aa6d-4476-81c5-935dfd952c29_contig_3	Plasmid	BSI	8946	50.96	koxytoca	213	NA	NA	34	18	NA	NA	Col440II_1	NA	MOBP,MOBP	-	MOBP	mobilizable	PTU-E3	V	0.7945	NA	NA	NA	NA	NA	NA	NA	NA	PRJNA604975	NA
OX-BSI-88_1	1f0092db-aa6d-4476-81c5-935dfd952c29_contig	1f0092db-aa6d-4476-81c5-935dfd952c29_contig_chromo	Chromosome	BSI	5880257	56.17	koxytoca	213	NA	NA	NA	NA	aph(3')-Ia,blaOXY,oqxA,oqxB	IS1B,IS4,IS4321R,ISEc21,ISEc36,ISEc42,ISKpn21,ISRaq1	NA	acn-BAC0003,acrA-BAC0005,acrC-BAC0007,acrD-BAC0563,acrE/envC-BAC0009,acrF/envD-BAC0010,actP/yjcG-BAC0564,arsC-BAC0583,baeS-BAC0040,bepG-BAC0046,bfrA-BAC0048,bhsA/ycfR/comC-BAC0049,cepA-BAC0061,comR/ycfQ-BAC0076,copA-BAC0725,copS-BAC0637,corA-BAC0086,corB-BAC0643,corD-BAC0644,corR-BAC0089,cpxA-BAC0532,cueR/ybbI-BAC0105,cuiD-BAC0106,cusA/ybdE-BAC0107,cusB-BAC0108,cusC/ylcB-BAC0109,cutA-BAC0113,cutC…	NA	NA	NA	NA	NA	NA	NA	NA	NA	NA	NA	NA	NA	NA	NA	PRJNA604975	NA
OX-BSI-89_1	1f9542a4-c74e-40c8-b546-65b193aafdf1	1f9542a4-c74e-40c8-b546-65b193aafdf1_chromo	Chromosome	BSI	4997765	50.57	ecoli	95	NA	NA	NA	NA	NA	IS100kyp,IS1203,IS1397,IS200C,IS621,ISEc20,ISEc30,ISEc38,ISEc40,ISEc45,ISEc48,ISEc8	NA	acn-BAC0003,acrA-BAC0005,acrD/yffA-BAC0008,acrE/envC-BAC0009,acrF/envD-BAC0010,actP/yjcG-BAC0564,arsC-BAC0582,arsC-BAC0583,asr-BAC0038,baeS-BAC0040,bfrA-BAC0048,bhsA/ycfR/comC-BAC0049,comR/ycfQ-BAC0076,copA-BAC0725,corA-BAC0086,corB-BAC0643,corD-BAC0644,cpxA-BAC0532,cueO-BAC0103,cueR/ybbI-BAC0105,cusA/ybdE-BAC0107,cusB-BAC0108,cusC/ylcB-BAC0109,cusF/cusX-BAC0110,cusR/ylcA-BAC0111,cusS-BAC0112,cut…	NA	NA	NA	NA	NA	NA	NA	NA	NA	NA	2009-07-11	community	K84023	F	89	PRJNA604975	SAMN18263041
OX-BSI-90_1	1fdf9874-a588-4746-8623-bef66c99be9c	1fdf9874-a588-4746-8623-bef66c99be9c_chromo	Chromosome	BSI	5313566	50.28	ecoli	127	NA	NA	NA	NA	catA1,dfrA15,qacEdelta1,sul1,tet(B)	IS1203,IS26,IS6100,IS682,ISEc11,ISEc13,ISEc16,ISEc20,ISEc38,ISEc40,ISEc42	NA	acn-BAC0003,acrA-BAC0005,acrD/yffA-BAC0008,acrE/envC-BAC0009,acrF/envD-BAC0010,actP/yjcG-BAC0564,arsC-BAC0582,arsC-BAC0583,asr-BAC0038,baeS-BAC0040,bfrA-BAC0048,bhsA/ycfR/comC-BAC0049,blt-BAC0050,comR/ycfQ-BAC0076,copA-BAC0725,copS-BAC0752,corA-BAC0086,corB-BAC0643,corD-BAC0644,cpxA-BAC0532,cueO-BAC0103,cueR/ybbI-BAC0105,cusA/ybdE-BAC0107,cusB-BAC0108,cusC/ylcB-BAC0109,cusF/cusX-BAC0110,cusR/ylcA…	NA	NA	NA	NA	NA	NA	NA	NA	NA	NA	2009-04-09	community	K84023	M	59	PRJNA604975	SAMN18263040
OX-BSI-91_2	2209722f-1095-4952-8131-b6f08869b9f9	2209722f-1095-4952-8131-b6f08869b9f9_2	Plasmid	BSI	113025	51.28	ecoli	73	224	2	15	38	aadA1,qacEdelta1,sul1	IS1R,IS26,ISEc10,ISKpn26	Col156_1,IncFIB(AP001918)_1,IncFIC(FII)_1	qacEdelta1-BAC0323	MOBF,MOBP	MPF_F	MOBF	conjugative	PTU-FE	III	1	NA	NA	NA	2014-06-17	nosocomial	V81999	M	27	PRJNA604975	NA
OX-BSI-91_1	2209722f-1095-4952-8131-b6f08869b9f9	2209722f-1095-4952-8131-b6f08869b9f9_chromo	Chromosome	BSI	5134784	50.47	ecoli	73	NA	NA	NA	NA	blaEC-5	IS1203,IS200C,IS30,IS629,IS630,IS682,ISEc13,ISEc16,ISEc20,ISEc39,ISEc41,ISEc42,ISEc45,ISSfl8	NA	acn-BAC0003,acrA-BAC0005,acrD/yffA-BAC0008,acrE/envC-BAC0009,acrF/envD-BAC0010,actP/yjcG-BAC0564,arsC-BAC0582,arsC-BAC0583,asr-BAC0038,baeS-BAC0040,bfrA-BAC0048,bhsA/ycfR/comC-BAC0049,comR/ycfQ-BAC0076,copA-BAC0725,corA-BAC0086,corB-BAC0643,corD-BAC0644,cpxA-BAC0532,cueO-BAC0103,cueR/ybbI-BAC0105,cusA/ybdE-BAC0107,cusB-BAC0108,cusC/ylcB-BAC0109,cusF/cusX-BAC0110,cusR/ylcA-BAC0111,cusS-BAC0112,cut…	NA	NA	NA	NA	NA	NA	NA	NA	NA	NA	2014-06-17	nosocomial	V81999	M	27	PRJNA604975	NA
OX-BSI-92_4	2233c4fd-c922-4fa8-8b2a-e47069550774_contig	2233c4fd-c922-4fa8-8b2a-e47069550774_contig_4	Plasmid	BSI	12334	49.93	ecoli	5566	NA	NA	NA	NA	NA	NA	NA	NA	-	-	-	non-mobilizable	-	-	1	NA	NA	NA	NA	NA	NA	NA	NA	PRJNA604975	SAMN18263025
OX-BSI-92_1	2233c4fd-c922-4fa8-8b2a-e47069550774_contig	2233c4fd-c922-4fa8-8b2a-e47069550774_contig_chromo	Chromosome	BSI	4898408	50.41	ecoli	5566	NA	NA	NA	NA	NA	IS30,IS911,ISEc21,ISEc38	NA	acn-BAC0003,acrA-BAC0005,acrB-BAC0006,acrD/yffA-BAC0008,acrE/envC-BAC0009,acrF/envD-BAC0010,actP/yjcG-BAC0564,arsB-BAC0578,arsC-BAC0583,arsC-BAC0584,arsR-BAC0594,baeS-BAC0040,bfrA-BAC0048,bhsA/ycfR/comC-BAC0049,comR/ycfQ-BAC0076,copA-BAC0725,corA-BAC0086,corB-BAC0643,corC-BAC0088,corD-BAC0644,corR-BAC0089,cpxA-BAC0532,cueR/ybbI-BAC0105,cusA/ybdE-BAC0107,cusB-BAC0108,cusC/ylcB-BAC0109,cusF/cusX-BA…	NA	NA	NA	NA	NA	NA	NA	NA	NA	NA	NA	NA	NA	NA	NA	PRJNA604975	SAMN18263025
OX-BSI-92_2	2233c4fd-c922-4fa8-8b2a-e47069550774_contig	2233c4fd-c922-4fa8-8b2a-e47069550774_contig_1	Plasmid	BSI	87609	52.42	ecoli	5566	NA	NA	NA	NA	NA	IS21,IS91	IncI1_1_Alpha	dsbA-BAC0136	MOBP	MPF_I	-	conjugative	-	-	1	NA	NA	NA	NA	NA	NA	NA	NA	PRJNA604975	SAMN18263025
OX-BSI-92_5	2233c4fd-c922-4fa8-8b2a-e47069550774_contig	2233c4fd-c922-4fa8-8b2a-e47069550774_contig_5	Plasmid	BSI	70448	50.78	ecoli	5566	NA	NA	NA	NA	NA	NA	IncFII(pCoo)_1_pCoo	NA	MOBF	MPF_F	-	conjugative	-	-	1	NA	NA	NA	NA	NA	NA	NA	NA	PRJNA604975	SAMN18263025
OX-BSI-92_3	2233c4fd-c922-4fa8-8b2a-e47069550774_contig	2233c4fd-c922-4fa8-8b2a-e47069550774_contig_3	Plasmid	BSI	90336	50.93	ecoli	5566	NA	NA	184	3	NA	IS1414,IS2,IS21,ISEc20	IncI1_1_Alpha	dsbA-BAC0136	MOBP	MPF_I	-	conjugative	-	-	1	NA	NA	NA	NA	NA	NA	NA	NA	PRJNA604975	SAMN18263025
OX-BSI-93_3	2294952a-6a80-4178-867b-dbb8080455ab_contig	2294952a-6a80-4178-867b-dbb8080455ab_contig_3	Plasmid	BSI	129313	54.13	kpneumoniae	468	NA	NA	NA	NA	aadA1,dfrA1,qacEdelta1,sul1	IS903	IncR_1	arsB-BAC0578,arsC-BAC0582,arsH-BAC0034,arsR-BAC0591,merA-BAC0652,merC-BAC0664,merD-BAC0667,merE-BAC0672,merP-BAC0678,merR-BAC0689,merT-BAC0233,qacEdelta1-BAC0323,sugE-BAC0378	MOBF,MOBF	MPF_F	-	conjugative	PTU-FK	III	1	NA	NA	NA	NA	NA	NA	NA	NA	PRJNA604975	NA
OX-BSI-93_4	2294952a-6a80-4178-867b-dbb8080455ab_contig	2294952a-6a80-4178-867b-dbb8080455ab_contig_4	Plasmid	BSI	1570	51.59	kpneumoniae	468	NA	NA	29	21	NA	NA	Col(MG828)_1	NA	-	-	MOBP	mobilizable	PTU-E9	VI	1	NA	NA	NA	NA	NA	NA	NA	NA	PRJNA604975	NA
OX-BSI-93_1	2294952a-6a80-4178-867b-dbb8080455ab_contig	2294952a-6a80-4178-867b-dbb8080455ab_contig_chromo	Chromosome	BSI	5621436	57.2	kpneumoniae	468	NA	NA	NA	NA	blaLEN-17,fosA,oqxA,oqxB	ISEhe3	NA	acn-BAC0003,acrA-BAC0005,acrB-BAC0006,acrD-BAC0563,acrE/envC-BAC0009,acrF/envD-BAC0010,adeE-BAC0013,arsB-BAC0576,arsC-BAC0582,arsC-BAC0583,arsR-BAC0589,baeS-BAC0040,bepG-BAC0046,bfrA-BAC0048,bhsA/ycfR/comC-BAC0049,chrA-BAC0026,chrB-BAC0027,comR/ycfQ-BAC0076,copA-BAC0725,corA-BAC0086,corB-BAC0643,corD-BAC0644,corR-BAC0089,cpxA-BAC0532,cueR/ybbI-BAC0105,cusA/ybdE-BAC0107,cusB-BAC0108,cusC/ylcB-BAC0…	NA	NA	NA	NA	NA	NA	NA	NA	NA	NA	NA	NA	NA	NA	NA	PRJNA604975	NA
OX-BSI-93_2	2294952a-6a80-4178-867b-dbb8080455ab_contig	2294952a-6a80-4178-867b-dbb8080455ab_contig_2	Plasmid	BSI	180076	51.03	kpneumoniae	468	NA	NA	NA	NA	NA	IS2,ISEc33,ISSen4	IncFIB(K)_1_Kpn3	copG-BAC0746,fabL/ygaA-BAC0158,mdtB/yegN-BAC0211,nikB-BAC0271,nikC-BAC0272,nikD-BAC0273,nikE-BAC0274,pcoA-BAC0303,pcoB-BAC0304,pcoC-BAC0305,pcoD-BAC0306,pcoE-BAC0307,pcoR-BAC0308,pcoS-BAC0309,silA-BAC0341,silB-BAC0342,silC-BAC0343,silE-BAC0344,silF-BAC0345,silP-BAC0346,silR-BAC0347,silS-BAC0348	MOBH	-	-	mobilizable	-	-	1	NA	NA	NA	NA	NA	NA	NA	NA	PRJNA604975	NA
OX-BSI-94_2	22a9cac9-e769-4e6b-bed8-01f835c0e170_contig	22a9cac9-e769-4e6b-bed8-01f835c0e170_contig_1	Plasmid	BSI	5636	51.26	kpneumoniae	589	NA	NA	NA	NA	NA	NA	NA	NA	-	-	-	non-mobilizable	-	-	1	NA	NA	NA	NA	NA	NA	NA	NA	PRJNA604975	NA
OX-BSI-94_3	22a9cac9-e769-4e6b-bed8-01f835c0e170_contig	22a9cac9-e769-4e6b-bed8-01f835c0e170_contig_3	Plasmid	BSI	256248	52.24	kpneumoniae	589	NA	NA	16	37	NA	IS102,IS1F,IS1X3,IS5708,ISEcl1,ISKpn21,ISPpu12,ISSen4	IncFIB(K)_1_Kpn3,IncFII_1_pKP91	arsA-BAC0571,arsC-BAC0582,arsC-BAC0584,arsH-BAC0034,arsR-BAC0589,arsR-BAC0591,copG-BAC0717,fecE-BAC0164,merD-BAC0666,merE-BAC0672,merF-BAC0228,merP-BAC0231,merR2-BAC0688,merT-BAC0691,nikB-BAC0271,nikC-BAC0272,nikD-BAC0273,pbrR-BAC0301,pcoA-BAC0303,pcoB-BAC0304,pcoC-BAC0305,pcoD-BAC0306,pcoE-BAC0307,pcoR-BAC0308,pcoS-BAC0309,silA-BAC0341,silB-BAC0342,silC-BAC0343,silE-BAC0344,silF-BAC0345,silP-BAC…	MOBF,MOBF	MPF_F	-	conjugative	PTU-FK	III	1	NA	NA	NA	NA	NA	NA	NA	NA	PRJNA604975	NA
OX-BSI-94_4	22a9cac9-e769-4e6b-bed8-01f835c0e170_contig	22a9cac9-e769-4e6b-bed8-01f835c0e170_contig_4	Plasmid	BSI	79347	50.84	kpneumoniae	589	NA	NA	185	3	aph(3'')-Ib,aph(6)-Id,blaCTX-M-15,blaTEM-1,dfrA14,qnrS1,sul2,tet(A)	IS1R,IS1X2,IS4321R,IS5075,IS5708,ISEc9,ISKpn19,ISKpn26,ISSba14	IncY_1	blt-BAC0050	-	-	MOBP	mobilizable	-	-	1	NA	NA	NA	NA	NA	NA	NA	NA	PRJNA604975	NA
OX-BSI-94_1	22a9cac9-e769-4e6b-bed8-01f835c0e170_contig	22a9cac9-e769-4e6b-bed8-01f835c0e170_contig_chromo	Chromosome	BSI	5303248	57.29	kpneumoniae	589	NA	NA	NA	NA	NA	IS1X2,IS4321R,ISKpn1	NA	acn-BAC0003,acrA-BAC0005,acrB-BAC0006,acrD/yffA-BAC0008,acrE/envC-BAC0009,acrF/envD-BAC0010,actP/yjcG-BAC0564,adeE-BAC0013,arsB-BAC0578,arsC-BAC0582,arsC-BAC0583,arsR-BAC0589,baeR-BAC0596,bfrA-BAC0048,bhsA/ycfR/comC-BAC0049,cepA-BAC0061,comR/ycfQ-BAC0076,corA-BAC0086,corB-BAC0643,corD-BAC0644,corR-BAC0089,cpxA-BAC0532,cueO-BAC0103,cueR/ybbI-BAC0105,cusA/ybdE-BAC0107,cusB-BAC0108,cusC/ylcB-BAC0109…	NA	NA	NA	NA	NA	NA	NA	NA	NA	NA	NA	NA	NA	NA	NA	PRJNA604975	NA
OX-BSI-95_2	22de8ee1-57d3-473d-ae87-52a897bc780a	22de8ee1-57d3-473d-ae87-52a897bc780a_2	Plasmid	BSI	74098	50.78	ecoli	550	NA	NA	12	42	blaTEM-1	ISEc10	IncFIC(FII)_1	NA	MOBF	MPF_F	MOBF	conjugative	PTU-FE	III	1	NA	NA	NA	2018-03-19	community	K84027	F	84	PRJNA604975	NA
OX-BSI-95_3	22de8ee1-57d3-473d-ae87-52a897bc780a	22de8ee1-57d3-473d-ae87-52a897bc780a_3	Plasmid	BSI	7939	41.63	ecoli	550	NA	NA	41	14	NA	NA	ColRNAI_1	NA	MOBP,MOBP	-	MOBP	mobilizable	PTU-E1	III	0.9878	NA	NA	NA	2018-03-19	community	K84027	F	84	PRJNA604975	NA
OX-BSI-95_4	22de8ee1-57d3-473d-ae87-52a897bc780a	22de8ee1-57d3-473d-ae87-52a897bc780a_4	Plasmid	BSI	2089	47.2	ecoli	550	NA	NA	22	29	NA	NA	NA	NA	-	-	-	non-mobilizable	PTU-E47	III	1	NA	NA	NA	2018-03-19	community	K84027	F	84	PRJNA604975	NA
OX-BSI-95_1	22de8ee1-57d3-473d-ae87-52a897bc780a	22de8ee1-57d3-473d-ae87-52a897bc780a_chromo	Chromosome	BSI	5009075	50.75	ecoli	550	NA	NA	NA	NA	blaEC-5	IS100kyp,IS1203,IS1397,IS1F,IS3,IS30,IS609,IS621,ISEc20,ISEc38,ISEc40,ISEc42,ISEc8,ISSd1	NA	acn-BAC0003,acrA-BAC0005,acrD/yffA-BAC0008,acrE/envC-BAC0009,acrF/envD-BAC0010,actP/yjcG-BAC0564,arsC-BAC0582,arsC-BAC0583,asr-BAC0038,baeS-BAC0040,bfrA-BAC0048,bhsA/ycfR/comC-BAC0049,comR/ycfQ-BAC0076,copA-BAC0725,copS-BAC0752,corA-BAC0086,corB-BAC0643,corD-BAC0644,cpxA-BAC0532,cueO-BAC0103,cueR/ybbI-BAC0105,cusA/ybdE-BAC0107,cusB-BAC0108,cusC/ylcB-BAC0109,cusF/cusX-BAC0110,cusR/ylcA-BAC0111,cus…	NA	NA	NA	NA	NA	NA	NA	NA	NA	NA	2018-03-19	community	K84027	F	84	PRJNA604975	NA
OX-BSI-96_4	242fad6f-1dfc-46b8-aa03-ce9238896fbf	242fad6f-1dfc-46b8-aa03-ce9238896fbf_4	Plasmid	BSI	1549	51	ecoli	131	11	5	8	57	NA	NA	Col(MG828)_1	NA	-	-	MOB_unknown,MOBP	mobilizable	PTU-E9	VI	1	NA	NA	NA	2017-10-14	nosocomial	K84054	M	56	PRJNA604975	SAMN18263006
OX-BSI-96_1	242fad6f-1dfc-46b8-aa03-ce9238896fbf	242fad6f-1dfc-46b8-aa03-ce9238896fbf_chromo	Chromosome	BSI	5075145	50.75	ecoli	131	NA	NA	NA	NA	NA	IS100kyp,IS1203,IS1B,IS1F,IS2,IS200C,IS30,IS609,ISEc1,ISEc20,ISEc24,ISEc38,ISEc53,ISEc8,ISSd1,ISSen4	NA	acn-BAC0003,acrA-BAC0005,acrD/yffA-BAC0008,acrE/envC-BAC0009,acrF/envD-BAC0010,actP/yjcG-BAC0564,arsC-BAC0582,arsC-BAC0583,asr-BAC0038,baeS-BAC0040,bfrA-BAC0048,bhsA/ycfR/comC-BAC0049,comR/ycfQ-BAC0076,copA-BAC0725,corA-BAC0086,corB-BAC0643,corD-BAC0644,cpxA-BAC0532,cueO-BAC0103,cueR/ybbI-BAC0105,cusA/ybdE-BAC0107,cusB-BAC0108,cusC/ylcB-BAC0109,cusF/cusX-BAC0110,cusR/ylcA-BAC0111,cusS-BAC0112,cut…	NA	NA	NA	NA	NA	NA	NA	NA	NA	NA	2017-10-14	nosocomial	K84054	M	56	PRJNA604975	SAMN18263006
OX-BSI-96_2	242fad6f-1dfc-46b8-aa03-ce9238896fbf	242fad6f-1dfc-46b8-aa03-ce9238896fbf_2	Plasmid	BSI	117292	51.64	ecoli	131	24	2	5	68	aadA5,aph(3'')-Ib,aph(6)-Id,blaCTX-M-27,dfrA17,mph(A),qacEdelta1,sul1,sul2,tet(A)	IS100kyp,IS150,IS1A,IS1B,IS1R,IS1X2,IS5,IS6100,ISEc23	Col156_1,IncFIA_1,IncFIB(AP001918)_1,IncFII(pRSB107)_1_pRSB107	blt-BAC0050,qacEdelta1-BAC0323	MOBP	MPF_F	MOBF	conjugative	PTU-FE	III	0.994	NA	NA	NA	2017-10-14	nosocomial	K84054	M	56	PRJNA604975	SAMN18263006
OX-BSI-96_3	242fad6f-1dfc-46b8-aa03-ce9238896fbf	242fad6f-1dfc-46b8-aa03-ce9238896fbf_3	Plasmid	BSI	5167	47.51	ecoli	131	4	9	4	69	NA	NA	Col156_1	NA	MOBQ	-	-	mobilizable	PTU-E7	III	1	NA	NA	NA	2017-10-14	nosocomial	K84054	M	56	PRJNA604975	SAMN18263006
OX-BSI-97_8	24a5d36f-8c59-4aee-816a-659ca2e65d47	24a5d36f-8c59-4aee-816a-659ca2e65d47_8	Plasmid	BSI	5631	47.35	ecoli	59	NA	NA	11	43	NA	NA	ColRNAI_1	NA	MOBP	-	MOBP	mobilizable	PTU-E22	I	1	NA	NA	NA	2018-10-03	community	K84037	F	92	PRJNA604975	SAMN18263001
OX-BSI-97_14	24a5d36f-8c59-4aee-816a-659ca2e65d47	24a5d36f-8c59-4aee-816a-659ca2e65d47_14	Plasmid	BSI	2740	52.12	ecoli	59	NA	NA	98	6	NA	NA	Col(MP18)_1	NA	-	-	MOBP	mobilizable	-	-	1	NA	NA	NA	2018-10-03	community	K84037	F	92	PRJNA604975	SAMN18263001
OX-BSI-97_9	24a5d36f-8c59-4aee-816a-659ca2e65d47	24a5d36f-8c59-4aee-816a-659ca2e65d47_9	Plasmid	BSI	5250	39.85	ecoli	59	NA	NA	NA	NA	NA	NA	NA	NA	-	-	-	non-mobilizable	-	-	1	NA	NA	NA	2018-10-03	community	K84037	F	92	PRJNA604975	SAMN18263001
OX-BSI-97_7	24a5d36f-8c59-4aee-816a-659ca2e65d47	24a5d36f-8c59-4aee-816a-659ca2e65d47_7	Plasmid	BSI	5689	42.01	ecoli	59	NA	NA	31	20	NA	NA	Col156_1	NA	MOBQ	-	-	mobilizable	-	-	1	NA	NA	NA	2018-10-03	community	K84037	F	92	PRJNA604975	SAMN18263001
OX-BSI-97_1	24a5d36f-8c59-4aee-816a-659ca2e65d47	24a5d36f-8c59-4aee-816a-659ca2e65d47_chromo	Chromosome	BSI	5251081	50.84	ecoli	59	NA	NA	NA	NA	NA	IS1203,IS150,ISEc23,ISEc31,ISEc52,ISEc8,ISSd1	NA	acn-BAC0003,acrA-BAC0005,acrB-BAC0006,acrD/yffA-BAC0008,acrE/envC-BAC0009,acrF/envD-BAC0010,actP/yjcG-BAC0564,adeE-BAC0013,arsB-BAC0576,arsC-BAC0582,arsC-BAC0583,arsP-BAC0036,arsR-BAC0594,asr-BAC0038,baeS-BAC0040,bfrA-BAC0048,bhsA/ycfR/comC-BAC0049,comR/ycfQ-BAC0076,copA-BAC0725,corA-BAC0086,corB-BAC0643,corD-BAC0644,cpxA-BAC0532,cueO-BAC0103,cueR/ybbI-BAC0105,cusA/ybdE-BAC0107,cusB-BAC0108,cusC/…	NA	NA	NA	NA	NA	NA	NA	NA	NA	NA	2018-10-03	community	K84037	F	92	PRJNA604975	SAMN18263001
OX-BSI-97_6	24a5d36f-8c59-4aee-816a-659ca2e65d47	24a5d36f-8c59-4aee-816a-659ca2e65d47_6	Plasmid	BSI	6648	48.63	ecoli	59	NA	NA	17	35	NA	NA	ColRNAI_1	NA	MOBP	-	MOBP	mobilizable	PTU-E1	III	0.9722	NA	NA	NA	2018-10-03	community	K84037	F	92	PRJNA604975	SAMN18263001
OX-BSI-97_3	24a5d36f-8c59-4aee-816a-659ca2e65d47	24a5d36f-8c59-4aee-816a-659ca2e65d47_3	Plasmid	BSI	32450	40.7	ecoli	59	NA	NA	43	14	NA	NA	IncX4_1	triA-BAC0396,triC-BAC0398	MOBP	MPF_T	-	conjugative	PTU-X4	III	1	NA	NA	NA	2018-10-03	community	K84037	F	92	PRJNA604975	SAMN18263001
OX-BSI-97_5	24a5d36f-8c59-4aee-816a-659ca2e65d47	24a5d36f-8c59-4aee-816a-659ca2e65d47_5	Plasmid	BSI	7465	48.45	ecoli	59	NA	NA	54	11	NA	NA	Col156_1	NA	MOBQ	-	-	mobilizable	PTU-E7	III	1	NA	NA	NA	2018-10-03	community	K84037	F	92	PRJNA604975	SAMN18263001
OX-BSI-97_12	24a5d36f-8c59-4aee-816a-659ca2e65d47	24a5d36f-8c59-4aee-816a-659ca2e65d47_12	Plasmid	BSI	4073	44.12	ecoli	59	NA	NA	87	7	NA	NA	ColRNAI_1	NA	-	-	MOB_unknown,MOBF,MOBP	mobilizable	PTU-E58	III	1	NA	NA	NA	2018-10-03	community	K84037	F	92	PRJNA604975	SAMN18263001
OX-BSI-97_2	24a5d36f-8c59-4aee-816a-659ca2e65d47	24a5d36f-8c59-4aee-816a-659ca2e65d47_2	Plasmid	BSI	66259	50.82	ecoli	59	NA	NA	12	42	NA	NA	IncFIC(FII)_1	NA	MOBF	MPF_F	MOBF	conjugative	PTU-FE	III	1	NA	NA	NA	2018-10-03	community	K84037	F	92	PRJNA604975	SAMN18263001
OX-BSI-97_4	24a5d36f-8c59-4aee-816a-659ca2e65d47	24a5d36f-8c59-4aee-816a-659ca2e65d47_4	Plasmid	BSI	29018	41.31	ecoli	59	NA	NA	60	10	NA	NA	NA	NA	-	-	-	non-mobilizable	-	-	1	NA	NA	NA	2018-10-03	community	K84037	F	92	PRJNA604975	SAMN18263001
OX-BSI-97_15	24a5d36f-8c59-4aee-816a-659ca2e65d47	24a5d36f-8c59-4aee-816a-659ca2e65d47_15	Plasmid	BSI	2671	65.82	ecoli	59	NA	NA	NA	NA	NA	NA	NA	NA	-	-	-	non-mobilizable	-	-	1	NA	NA	NA	2018-10-03	community	K84037	F	92	PRJNA604975	SAMN18263001
OX-BSI-97_10	24a5d36f-8c59-4aee-816a-659ca2e65d47	24a5d36f-8c59-4aee-816a-659ca2e65d47_10	Plasmid	BSI	5164	47.5	ecoli	59	NA	NA	4	69	NA	NA	Col156_1	NA	MOBQ	-	-	mobilizable	PTU-E7	III	1	NA	NA	NA	2018-10-03	community	K84037	F	92	PRJNA604975	SAMN18263001
OX-BSI-97_11	24a5d36f-8c59-4aee-816a-659ca2e65d47	24a5d36f-8c59-4aee-816a-659ca2e65d47_11	Plasmid	BSI	4087	49.89	ecoli	59	NA	NA	21	29	NA	NA	Col8282_1	NA	MOBQ	-	MOBQ,MOBQ	mobilizable	PTU-E10	III	1	NA	NA	NA	2018-10-03	community	K84037	F	92	PRJNA604975	SAMN18263001
OX-BSI-97_17	24a5d36f-8c59-4aee-816a-659ca2e65d47	24a5d36f-8c59-4aee-816a-659ca2e65d47_17	Plasmid	BSI	1506	50.2	ecoli	59	156	3	6	62	NA	NA	Col(MG828)_1	NA	-	-	-	non-mobilizable	PTU-E9	VI	1	NA	NA	NA	2018-10-03	community	K84037	F	92	PRJNA604975	SAMN18263001
OX-BSI-97_16	24a5d36f-8c59-4aee-816a-659ca2e65d47	24a5d36f-8c59-4aee-816a-659ca2e65d47_16	Plasmid	BSI	2077	47.23	ecoli	59	NA	NA	22	29	NA	NA	Col(BS512)_1	NA	-	-	-	non-mobilizable	PTU-E47	III	1	NA	NA	NA	2018-10-03	community	K84037	F	92	PRJNA604975	SAMN18263001
OX-BSI-97_13	24a5d36f-8c59-4aee-816a-659ca2e65d47	24a5d36f-8c59-4aee-816a-659ca2e65d47_13	Plasmid	BSI	2934	43.52	ecoli	59	NA	NA	NA	NA	NA	NA	NA	NA	-	-	-	non-mobilizable	-	-	1	NA	NA	NA	2018-10-03	community	K84037	F	92	PRJNA604975	SAMN18263001
OX-BSI-98_2	2559c82f-4493-491b-bb92-7b6af95a3176	2559c82f-4493-491b-bb92-7b6af95a3176_2	Plasmid	BSI	157497	48.53	ecoli	-	198	2	186	3	NA	IS1203,ISEc16	IncFIB(AP001918)_1,IncFIC(FII)_1	czcR-BAC0125,czcS-BAC0126,smdA-BAC0353	MOBF	MPF_F	MOBF	conjugative	-	-	1	NA	NA	NA	2009-09-17	healthcare associated 31-365d	K84045	M	86	PRJNA604975	SAMN18262997
OX-BSI-98_3	2559c82f-4493-491b-bb92-7b6af95a3176	2559c82f-4493-491b-bb92-7b6af95a3176_3	Plasmid	BSI	65120	42.85	ecoli	-	NA	NA	35	17	NA	NA	IncI2_1_Delta	triC-BAC0398	MOBP	MPF_T	-	conjugative	PTU-I2	III	1	NA	NA	NA	2009-09-17	healthcare associated 31-365d	K84045	M	86	PRJNA604975	SAMN18262997
OX-BSI-98_1	2559c82f-4493-491b-bb92-7b6af95a3176	2559c82f-4493-491b-bb92-7b6af95a3176_chromo	Chromosome	BSI	4896682	50.66	ecoli	-	NA	NA	NA	NA	NA	IS609	NA	acn-BAC0003,acrA-BAC0005,acrD/yffA-BAC0008,acrE/envC-BAC0009,acrF/envD-BAC0010,actP/yjcG-BAC0564,arsB-BAC0576,arsC-BAC0582,arsC-BAC0583,arsP-BAC0036,arsR-BAC0594,asr-BAC0038,baeS-BAC0040,bfrA-BAC0048,bhsA/ycfR/comC-BAC0049,comR/ycfQ-BAC0076,copA-BAC0725,copS-BAC0752,corA-BAC0086,corB-BAC0643,corD-BAC0644,cpxA-BAC0532,cueO-BAC0103,cueR/ybbI-BAC0105,cusA/ybdE-BAC0107,cusB-BAC0108,cusC/ylcB-BAC0109,…	NA	NA	NA	NA	NA	NA	NA	NA	NA	NA	2009-09-17	healthcare associated 31-365d	K84045	M	86	PRJNA604975	SAMN18262997
OX-BSI-99_2	25bd9719-0055-44ad-a122-c490f08044b6	25bd9719-0055-44ad-a122-c490f08044b6_2	Plasmid	BSI	193295	51.45	ecoli	38	NA	NA	30	21	aac(3)-IIe,aac(6')-Ib-cr5,aadA5,blaCTX-M-15,blaOXA-1,catB3,dfrA17,mph(A),qacEdelta1,sul1	IS150,IS2,ISCro1,ISEc10,ISEc22,ISKpn11,ISKpn26,ISSm1,ISVsa5,Tn5403	Col156_1,IncFIA_1,IncFIB(AP001918)_1,IncFIC(FII)_1	fecD-BAC0163,fecE-BAC0164,qacEdelta1-BAC0323,sitA-BAC0349,sitB-BAC0350,sitC-BAC0351,sitD-BAC0352	MOBF,MOBP	MPF_F	MOBF	conjugative	PTU-?	I	0.7083	NA	NA	NA	2018-10-18	healthcare associated 31-365d	K84004	M	39	PRJNA604975	SAMN18262992
OX-BSI-99_1	25bd9719-0055-44ad-a122-c490f08044b6	25bd9719-0055-44ad-a122-c490f08044b6_chromo	Chromosome	BSI	5224047	50.67	ecoli	38	NA	NA	NA	NA	blaTEM-1,catA1,dfrA7,qacEdelta1,sul1,sul2,tet(D)	IS100kyp,IS1203,IS1H,IS21,IS30,IS4,ISEc17,ISEc38,ISEc46,ISEc49,ISVsa3	NA	acn-BAC0003,acrA-BAC0005,acrD/yffA-BAC0008,acrE/envC-BAC0009,acrF/envD-BAC0010,actP/yjcG-BAC0564,arsB-BAC0576,arsC-BAC0582,arsC-BAC0583,arsP-BAC0036,arsR-BAC0594,asr-BAC0038,baeS-BAC0040,bfrA-BAC0048,bhsA/ycfR/comC-BAC0049,comR/ycfQ-BAC0076,copA-BAC0725,copS-BAC0752,corA-BAC0086,corB-BAC0643,corC-BAC0088,corD-BAC0644,cpxA-BAC0532,cueO-BAC0103,cueR/ybbI-BAC0105,cusA/ybdE-BAC0107,cusB-BAC0108,cusC/…	NA	NA	NA	NA	NA	NA	NA	NA	NA	NA	2018-10-18	healthcare associated 31-365d	K84004	M	39	PRJNA604975	SAMN18262992
OX-BSI-100_2	25eed0ba-65ad-45ab-acf4-7e48994138e1	25eed0ba-65ad-45ab-acf4-7e48994138e1_2	Plasmid	BSI	116890	50.87	ecoli	12	16	2	1	123	NA	IS100kyp,IS21,IS26,ISEc10,ISEc53	Col156_1,IncFIB(AP001918)_1,IncFII(29)_1_pUTI89	NA	MOBF,MOBP	MPF_F	MOBF	conjugative	PTU-FE	III	0.9941	NA	NA	NA	2012-05-04	nosocomial	J83025	M	78	PRJNA604975	SAMN14345067
OX-BSI-100_1	25eed0ba-65ad-45ab-acf4-7e48994138e1	25eed0ba-65ad-45ab-acf4-7e48994138e1_chromo	Chromosome	BSI	5119569	50.46	ecoli	12	NA	NA	NA	NA	NA	IS100kyp,IS1203,IS1397,IS200C,IS621,IS682,ISEc13,ISEc16,ISEc20,ISEc31,ISEc40,ISEc42	NA	acn-BAC0003,acrA-BAC0005,acrD/yffA-BAC0008,acrE/envC-BAC0009,acrF/envD-BAC0010,actP/yjcG-BAC0564,arsC-BAC0582,arsC-BAC0583,asr-BAC0038,baeS-BAC0040,bfrA-BAC0048,bhsA/ycfR/comC-BAC0049,comR/ycfQ-BAC0076,copA-BAC0725,copS-BAC0752,corA-BAC0086,corB-BAC0643,corD-BAC0644,cpxA-BAC0532,cueO-BAC0103,cueR/ybbI-BAC0105,cusA/ybdE-BAC0107,cusB-BAC0108,cusC/ylcB-BAC0109,cusF/cusX-BAC0110,cusR/ylcA-BAC0111,cus…	NA	NA	NA	NA	NA	NA	NA	NA	NA	NA	2012-05-04	nosocomial	J83025	M	78	PRJNA604975	SAMN14345067
OX-BSI-100_3	25eed0ba-65ad-45ab-acf4-7e48994138e1	25eed0ba-65ad-45ab-acf4-7e48994138e1_3	Plasmid	BSI	5653	55.93	ecoli	12	NA	NA	NA	NA	NA	NA	NA	NA	-	-	-	non-mobilizable	-	-	1	NA	NA	NA	2012-05-04	nosocomial	J83025	M	78	PRJNA604975	SAMN14345067
OX-BSI-101_2	260c1741-7027-4a38-96e3-669c0655fd20	260c1741-7027-4a38-96e3-669c0655fd20_2	Plasmid	BSI	224365	51.11	kpneumoniae	490	NA	NA	19	33	NA	IS1A,IS1X4,IS903,ISEc21,ISEc36,ISKox1,ISKpn2,ISKpn21,ISKpn24,ISSen3	IncFIB(K)_1_Kpn3	copG-BAC0717,fecE-BAC0164,pcoA-BAC0303,pcoB-BAC0304,pcoC-BAC0305,pcoD-BAC0306,pcoE-BAC0307,pcoR-BAC0308,pcoS-BAC0309,pstB-BAC0316,silA-BAC0341,silB-BAC0342,silC-BAC0343,silE-BAC0344,silF-BAC0345,silP-BAC0346,silR-BAC0347,silS-BAC0348	-	-	-	non-mobilizable	PTU-E35	I	1	NA	NA	NA	2013-05-26	healthcare associated 31-365d	K84025	F	91	PRJNA604975	NA
OX-BSI-101_3	260c1741-7027-4a38-96e3-669c0655fd20	260c1741-7027-4a38-96e3-669c0655fd20_3	Plasmid	BSI	93237	52.1	kpneumoniae	490	13	2	117	5	NA	IS5075,Tn5403	FII(pBK30683)_1	NA	MOBF,MOBF	MPF_F	-	conjugative	PTU-E42	I	1	NA	NA	NA	2013-05-26	healthcare associated 31-365d	K84025	F	91	PRJNA604975	NA
OX-BSI-101_4	260c1741-7027-4a38-96e3-669c0655fd20	260c1741-7027-4a38-96e3-669c0655fd20_4	Plasmid	BSI	49278	51.63	kpneumoniae	490	NA	NA	13	41	aph(3'')-Ib,aph(6)-Id,blaCTX-M-15,blaTEM-1,sul2	IS102,IS5075,ISEc9	NA	NA	-	-	-	non-mobilizable	PTU-FK	III	0.9922	NA	NA	NA	2013-05-26	healthcare associated 31-365d	K84025	F	91	PRJNA604975	NA
OX-BSI-101_5	260c1741-7027-4a38-96e3-669c0655fd20	260c1741-7027-4a38-96e3-669c0655fd20_5	Plasmid	BSI	19076	47.57	kpneumoniae	490	NA	NA	20	32	NA	IS1X4,ISSen4,Tn5403	IncFIA(HI1)_1_HI1	NA	-	-	MOBF	mobilizable	-	-	1	NA	NA	NA	2013-05-26	healthcare associated 31-365d	K84025	F	91	PRJNA604975	NA
OX-BSI-101_6	260c1741-7027-4a38-96e3-669c0655fd20	260c1741-7027-4a38-96e3-669c0655fd20_6	Plasmid	BSI	9553	51.74	kpneumoniae	490	5	32	18	34	NA	Tn5403	NA	NA	MOBP	-	-	mobilizable	-	-	1	NA	NA	NA	2013-05-26	healthcare associated 31-365d	K84025	F	91	PRJNA604975	NA
OX-BSI-101_7	260c1741-7027-4a38-96e3-669c0655fd20	260c1741-7027-4a38-96e3-669c0655fd20_7	Plasmid	BSI	8492	46.86	kpneumoniae	490	20	2	142	4	NA	NA	ColRNAI_1	NA	-	-	-	non-mobilizable	-	-	1	NA	NA	NA	2013-05-26	healthcare associated 31-365d	K84025	F	91	PRJNA604975	NA
OX-BSI-101_8	260c1741-7027-4a38-96e3-669c0655fd20	260c1741-7027-4a38-96e3-669c0655fd20_8	Plasmid	BSI	5366	52.4	kpneumoniae	490	NA	NA	83	7	NA	Tn5403	NA	NA	-	-	-	non-mobilizable	-	-	1	NA	NA	NA	2013-05-26	healthcare associated 31-365d	K84025	F	91	PRJNA604975	NA
OX-BSI-101_1	260c1741-7027-4a38-96e3-669c0655fd20	260c1741-7027-4a38-96e3-669c0655fd20_chromo	Chromosome	BSI	5420939	57.34	kpneumoniae	490	NA	NA	NA	NA	blaCTX-M-15,blaSHV-1,fosA,oqxA,oqxB	IS5075,ISEc21,ISEc9,Tn5403	NA	acn-BAC0003,acrA-BAC0005,acrB-BAC0006,acrC-BAC0007,acrD-BAC0563,acrE/envC-BAC0009,acrF/envD-BAC0010,actP/yjcG-BAC0564,adeE-BAC0013,arsB-BAC0578,arsC-BAC0582,arsC-BAC0583,arsR-BAC0589,baeR-BAC0596,baeS-BAC0040,bepG-BAC0046,bfrA-BAC0048,bhsA/ycfR/comC-BAC0049,cepA-BAC0061,comR/ycfQ-BAC0076,copA-BAC0725,corA-BAC0086,corB-BAC0643,corD-BAC0644,corR-BAC0089,cpxA-BAC0532,cueR/ybbI-BAC0105,cusA/ybdE-BAC0…	NA	NA	NA	NA	NA	NA	NA	NA	NA	NA	2013-05-26	healthcare associated 31-365d	K84025	F	91	PRJNA604975	NA
OX-BSI-102_1	261017a0-0b63-433d-87ae-ee5f3e3e6056	261017a0-0b63-433d-87ae-ee5f3e3e6056_chromo	Chromosome	BSI	4864082	50.83	ecoli	367	NA	NA	NA	NA	NA	IS1H,IS1X4,IS609,IS911,ISEc8,ISSd1	NA	acn-BAC0003,acrA-BAC0005,acrB-BAC0006,acrD/yffA-BAC0008,acrE/envC-BAC0009,acrF/envD-BAC0010,actP/yjcG-BAC0564,arsB-BAC0576,arsC-BAC0583,arsC-BAC0584,arsR-BAC0594,asr-BAC0038,baeS-BAC0040,bfrA-BAC0048,bhsA/ycfR/comC-BAC0049,comR/ycfQ-BAC0076,copA-BAC0725,copS-BAC0752,corA-BAC0086,corB-BAC0643,corD-BAC0644,cpxA-BAC0532,cueO-BAC0103,cueR/ybbI-BAC0105,cusA/ybdE-BAC0107,cusB-BAC0108,cusC/ylcB-BAC0109,…	NA	NA	NA	NA	NA	NA	NA	NA	NA	NA	2016-12-17	healthcare associated 31-365d	K84011	F	89	PRJNA604975	SAMN18262988
OX-BSI-102_2	261017a0-0b63-433d-87ae-ee5f3e3e6056	261017a0-0b63-433d-87ae-ee5f3e3e6056_2	Plasmid	BSI	148956	51.08	ecoli	367	NA	NA	2	100	aph(3'')-Ib,aph(3')-Ia,aph(6)-Id,blaTEM-1,dfrA5,sul2	IS2,IS629,ISEc32	IncFIB(AP001918)_1,IncFII_1	merA-BAC0652,merC-BAC0664,merD-BAC0666,merE-BAC0670,merP-BAC0678,merR-BAC0232,merT-BAC0693,sitA-BAC0349,sitB-BAC0350,sitC-BAC0351,sitD-BAC0352,smdB-BAC0354,tupC-BAC0607	MOBF	MPF_F	MOBF	conjugative	PTU-?	III	0.6905	NA	NA	NA	2016-12-17	healthcare associated 31-365d	K84011	F	89	PRJNA604975	SAMN18262988
OX-BSI-103_3	2689a1c8-ae9e-4f7b-bc2c-0ddc73053a02	2689a1c8-ae9e-4f7b-bc2c-0ddc73053a02_3	Plasmid	BSI	5149	47.17	ecoli	69	NA	NA	55	11	NA	NA	Col156_1	NA	MOBQ	-	-	mobilizable	PTU-E7	III	1	NA	NA	NA	2009-11-07	nosocomial	Y00437	M	51	PRJNA604975	SAMN18262984
OX-BSI-103_1	2689a1c8-ae9e-4f7b-bc2c-0ddc73053a02	2689a1c8-ae9e-4f7b-bc2c-0ddc73053a02_chromo	Chromosome	BSI	5033475	50.58	ecoli	69	NA	NA	NA	NA	NA	IS1F,IS4,IS911,ISEc46,ISSd1	NA	acn-BAC0003,acrA-BAC0005,acrB-BAC0006,acrD/yffA-BAC0008,acrE/envC-BAC0009,acrF/envD-BAC0010,actP/yjcG-BAC0564,arsA-BAC0571,arsB-BAC0576,arsC-BAC0582,arsC-BAC0583,arsD-BAC0587,arsP-BAC0036,arsR-BAC0594,asr-BAC0038,baeS-BAC0040,bfrA-BAC0048,bhsA/ycfR/comC-BAC0049,comR/ycfQ-BAC0076,copA-BAC0725,copS-BAC0752,corA-BAC0086,corB-BAC0643,corD-BAC0644,cpxA-BAC0532,cueO-BAC0103,cueR/ybbI-BAC0105,cusA/ybdE-…	NA	NA	NA	NA	NA	NA	NA	NA	NA	NA	2009-11-07	nosocomial	Y00437	M	51	PRJNA604975	SAMN18262984
OX-BSI-103_2	2689a1c8-ae9e-4f7b-bc2c-0ddc73053a02	2689a1c8-ae9e-4f7b-bc2c-0ddc73053a02_2	Plasmid	BSI	158362	51.51	ecoli	69	NA	NA	2	100	aph(3'')-Ib,aph(3')-Ia,aph(6)-Id,blaTEM-1,dfrA5,sul2,tet(A)	IS2,IS629,ISEc32	IncFIB(AP001918)_1,IncFII_1	blt-BAC0050,merA-BAC0652,merC-BAC0664,merD-BAC0666,merE-BAC0670,merP-BAC0678,merR-BAC0232,merT-BAC0693,sitA-BAC0349,sitB-BAC0350,sitC-BAC0351,sitD-BAC0352,smdB-BAC0354,tupC-BAC0607	MOBF	MPF_F	MOBF	conjugative	PTU-FE	III	1	NA	NA	NA	2009-11-07	nosocomial	Y00437	M	51	PRJNA604975	SAMN18262984
OX-BSI-104_2	27e2513d-6427-411b-ba7c-0f2fce69a57b	27e2513d-6427-411b-ba7c-0f2fce69a57b_2	Plasmid	BSI	11432	42.34	ecoli	73	NA	NA	31	20	NA	NA	NA	NA	MOBQ	-	-	mobilizable	-	-	1	NA	NA	NA	2011-06-25	community	K84608	M	80	PRJNA604975	SAMN18262975
OX-BSI-104_1	27e2513d-6427-411b-ba7c-0f2fce69a57b	27e2513d-6427-411b-ba7c-0f2fce69a57b_chromo	Chromosome	BSI	5091203	50.51	ecoli	73	NA	NA	NA	NA	NA	IS100kyp,IS1203,IS1353,IS1F,IS200C,IS4,IS630,ISCro1,ISEc13,ISEc16,ISEc20,ISEc39,ISEc41,ISEc42,ISEc49,ISEc8	NA	acn-BAC0003,acrA-BAC0005,acrB-BAC0006,acrD/yffA-BAC0008,acrE/envC-BAC0009,acrF/envD-BAC0010,actP/yjcG-BAC0564,arsC-BAC0582,asr-BAC0038,baeS-BAC0040,bfrA-BAC0048,bhsA/ycfR/comC-BAC0049,comR/ycfQ-BAC0076,copA-BAC0725,corA-BAC0086,corB-BAC0643,corD-BAC0644,cpxA-BAC0532,cueO-BAC0103,cueR/ybbI-BAC0105,cusA/ybdE-BAC0107,cusB-BAC0108,cusC/ylcB-BAC0109,cusF/cusX-BAC0110,cusR/ylcA-BAC0111,cusS-BAC0112,cut…	NA	NA	NA	NA	NA	NA	NA	NA	NA	NA	2011-06-25	community	K84608	M	80	PRJNA604975	SAMN18262975
OX-BSI-105_1	281d0ecf-b18c-46c9-95e0-f46cbcd2e826	281d0ecf-b18c-46c9-95e0-f46cbcd2e826_chromo	Chromosome	BSI	4820553	50.78	ecoli	448	NA	NA	NA	NA	NA	IS1F,IS1H,IS3,IS30,ISEc17,ISEc26	NA	acn-BAC0003,acrA-BAC0005,acrB-BAC0006,acrD/yffA-BAC0008,acrE/envC-BAC0009,acrF/envD-BAC0010,actP/yjcG-BAC0564,arsB-BAC0576,arsC-BAC0583,arsC-BAC0584,arsP-BAC0036,arsR-BAC0594,asr-BAC0038,baeS-BAC0040,bfrA-BAC0048,bhsA/ycfR/comC-BAC0049,comR/ycfQ-BAC0076,copA-BAC0725,copG-BAC0717,corA-BAC0086,corB-BAC0643,corD-BAC0644,cpxA-BAC0532,cueO-BAC0103,cueR/ybbI-BAC0105,cusA/ybdE-BAC0107,cusB-BAC0108,cusC/…	NA	NA	NA	NA	NA	NA	NA	NA	NA	NA	2018-11-17	community	K84082	F	70	PRJNA604975	SAMN18262970
OX-BSI-106_4	2829c54a-2aaa-4897-99a3-5c71c680dcfa	2829c54a-2aaa-4897-99a3-5c71c680dcfa_4	Plasmid	BSI	5163	47.47	ecoli	69	7	5	4	69	NA	NA	Col156_1	NA	MOBQ	-	-	mobilizable	PTU-E7	III	1	NA	NA	NA	2018-04-18	nosocomial	K82018	F	66	PRJNA604975	SAMN18262968
OX-BSI-106_5	2829c54a-2aaa-4897-99a3-5c71c680dcfa	2829c54a-2aaa-4897-99a3-5c71c680dcfa_5	Plasmid	BSI	2096	55.53	ecoli	69	NA	NA	NA	NA	NA	NA	ColpVC_1	NA	-	-	MOBP	mobilizable	PTU-E11	III	1	NA	NA	NA	2018-04-18	nosocomial	K82018	F	66	PRJNA604975	SAMN18262968
OX-BSI-106_1	2829c54a-2aaa-4897-99a3-5c71c680dcfa	2829c54a-2aaa-4897-99a3-5c71c680dcfa_chromo	Chromosome	BSI	5038038	50.72	ecoli	69	NA	NA	NA	NA	NA	IS1351,IS1F,IS2,IS911,ISEc22,ISEc38,ISEc46,ISEc8	NA	acn-BAC0003,acrA-BAC0005,acrB-BAC0006,acrD/yffA-BAC0008,acrE/envC-BAC0009,acrF/envD-BAC0010,actP/yjcG-BAC0564,arsA-BAC0571,arsB-BAC0576,arsC-BAC0582,arsC-BAC0583,arsD-BAC0587,arsP-BAC0036,arsR-BAC0594,asr-BAC0038,baeS-BAC0040,bfrA-BAC0048,bhsA/ycfR/comC-BAC0049,comR/ycfQ-BAC0076,copA-BAC0725,copS-BAC0752,corA-BAC0086,corB-BAC0643,corD-BAC0644,cpxA-BAC0532,cueO-BAC0103,cueR/ybbI-BAC0105,cusA/ybdE-…	NA	NA	NA	NA	NA	NA	NA	NA	NA	NA	2018-04-18	nosocomial	K82018	F	66	PRJNA604975	SAMN18262968
OX-BSI-106_3	2829c54a-2aaa-4897-99a3-5c71c680dcfa	2829c54a-2aaa-4897-99a3-5c71c680dcfa_3	Plasmid	BSI	70614	50.87	ecoli	69	NA	NA	12	42	NA	ISEc23,ISEc45	IncFIC(FII)_1	NA	MOBF	MPF_F	MOBF	conjugative	PTU-FE	III	0.6905	NA	NA	NA	2018-04-18	nosocomial	K82018	F	66	PRJNA604975	SAMN18262968
OX-BSI-106_2	2829c54a-2aaa-4897-99a3-5c71c680dcfa	2829c54a-2aaa-4897-99a3-5c71c680dcfa_2	Plasmid	BSI	104730	52.22	ecoli	69	NA	NA	30	21	aadA5,dfrA17,mph(A),qacEdelta1,sul1	IS1R,ISCro1,ISSm1	IncFIA_1,IncFIB(AP001918)_1,IncFIC(FII)_1	qacEdelta1-BAC0323	MOBF	MPF_F	MOBF	conjugative	PTU-?	I	0.6905	NA	NA	NA	2018-04-18	nosocomial	K82018	F	66	PRJNA604975	SAMN18262968
OX-BSI-107_1	287e7e98-f7ab-477d-b4a5-46541ffda33d	287e7e98-f7ab-477d-b4a5-46541ffda33d_chromo	Chromosome	BSI	4990041	50.78	ecoli	-	NA	NA	NA	NA	NA	IS100kyp,IS1203,IS1F,IS2,IS200C,IS30,IS609,ISEc1,ISEc20,ISEc24,ISEc38,ISEc53,ISEc8,ISSd1	NA	acn-BAC0003,acrA-BAC0005,acrD/yffA-BAC0008,acrE/envC-BAC0009,acrF/envD-BAC0010,actP/yjcG-BAC0564,arsC-BAC0582,arsC-BAC0583,asr-BAC0038,baeS-BAC0040,bfrA-BAC0048,bhsA/ycfR/comC-BAC0049,comR/ycfQ-BAC0076,copA-BAC0725,corA-BAC0086,corB-BAC0643,corD-BAC0644,cpxA-BAC0532,cueO-BAC0103,cueR/ybbI-BAC0105,cusA/ybdE-BAC0107,cusB-BAC0108,cusC/ylcB-BAC0109,cusF/cusX-BAC0110,cusR/ylcA-BAC0111,cusS-BAC0112,cut…	NA	NA	NA	NA	NA	NA	NA	NA	NA	NA	2009-10-12	community	K84014	F	53	PRJNA604975	SAMN18262965
OX-BSI-107_2	287e7e98-f7ab-477d-b4a5-46541ffda33d	287e7e98-f7ab-477d-b4a5-46541ffda33d_2	Plasmid	BSI	89456	53	ecoli	-	NA	NA	7	58	blaTEM-1	ISEc23,Tn3	IncB/O/K/Z_2	NA	MOBP	MPF_I	MOBP	conjugative	PTU-B/O/K/Z	III	1	NA	NA	NA	2009-10-12	community	K84014	F	53	PRJNA604975	SAMN18262965
OX-BSI-108_1	28cfd66c-4b98-4dd5-8f32-eabeef3fe2fb	28cfd66c-4b98-4dd5-8f32-eabeef3fe2fb_chromo	Chromosome	BSI	5077817	50.79	ecoli	131	NA	NA	NA	NA	aadA5,aph(3'')-Ib,dfrA17,mph(A),qacEdelta1,sul1,sul2	IS100kyp,IS1397,IS150,IS21,IS26,IS609,IS6100,ISEc1,ISEc10,ISEc20,ISEc22,ISEc24,ISEc38,ISEc40,ISEc8	NA	acn-BAC0003,acrA-BAC0005,acrD/yffA-BAC0008,acrE/envC-BAC0009,acrF/envD-BAC0010,actP/yjcG-BAC0564,arsC-BAC0582,arsC-BAC0583,asr-BAC0038,baeS-BAC0040,bfrA-BAC0048,bhsA/ycfR/comC-BAC0049,comR/ycfQ-BAC0076,copA-BAC0725,corA-BAC0086,corB-BAC0643,corD-BAC0644,cpxA-BAC0532,cueO-BAC0103,cueR/ybbI-BAC0105,cusA/ybdE-BAC0107,cusB-BAC0108,cusC/ylcB-BAC0109,cusF/cusX-BAC0110,cusR/ylcA-BAC0111,cusS-BAC0112,cut…	NA	NA	NA	NA	NA	NA	NA	NA	NA	NA	2018-10-17	healthcare associated 0-30d	K84025	F	68	PRJNA604975	SAMN18262961
OX-BSI-108_2	28cfd66c-4b98-4dd5-8f32-eabeef3fe2fb	28cfd66c-4b98-4dd5-8f32-eabeef3fe2fb_2	Plasmid	BSI	120873	50.74	ecoli	131	NA	NA	1	123	blaTEM-1	IS100kyp,IS1R,IS21,ISEc23,ISEc53	Col156_1,IncFIB(AP001918)_1,IncFII(29)_1_pUTI89	NA	MOBF,MOBP	MPF_F	MOBF	conjugative	PTU-FE	III	0.9941	NA	NA	NA	2018-10-17	healthcare associated 0-30d	K84025	F	68	PRJNA604975	SAMN18262961
OX-BSI-109_1	293df4d6-3962-4a9e-84d5-c0ca4d02430e_contig	293df4d6-3962-4a9e-84d5-c0ca4d02430e_contig_chromo	Chromosome	BSI	5085351	50.53	ecoli	73	NA	NA	NA	NA	blaEC-5	IS10L,IS1203,IS1F,IS2,IS4,IS630,IS682,ISCro1,ISEc20,ISEc22,ISEc39,ISEc41,ISEc42,ISEc43,ISEc49,ISEc8	NA	acn-BAC0003,acrA-BAC0005,acrD/yffA-BAC0008,acrE/envC-BAC0009,acrF/envD-BAC0010,acrR/ybaH-BAC0011,actP/yjcG-BAC0564,arsC-BAC0582,arsC-BAC0583,asr-BAC0038,baeS-BAC0040,bfrA-BAC0048,bhsA/ycfR/comC-BAC0049,comR/ycfQ-BAC0076,copA-BAC0725,corA-BAC0086,corB-BAC0643,corC-BAC0088,corD-BAC0644,cpxA-BAC0532,cueR/ybbI-BAC0105,cusA/ybdE-BAC0107,cusB-BAC0108,cusC/ylcB-BAC0109,cusF/cusX-BAC0110,cusR/ylcA-BAC011…	NA	NA	NA	NA	NA	NA	NA	NA	NA	NA	NA	NA	NA	NA	NA	PRJNA604975	SAMN18262956
OX-BSI-109_2	293df4d6-3962-4a9e-84d5-c0ca4d02430e_contig	293df4d6-3962-4a9e-84d5-c0ca4d02430e_contig_2	Plasmid	BSI	149492	50.24	ecoli	73	NA	NA	15	38	blaTEM-1,tet(B)	IS10L,IS26,ISEc10,ISEc22,ISKpn26,ISVsa5,Tn3	Col156_1,IncFIB(AP001918)_1,IncFIC(FII)_1	blt-BAC0050,cpxR-BAC0533,fecD-BAC0163,fecE-BAC0164	MOBF,MOBP	MPF_F	MOBF	conjugative	PTU-FE	III	1	NA	NA	NA	NA	NA	NA	NA	NA	PRJNA604975	SAMN18262956
OX-BSI-110_3	29868da9-9dec-4cba-9066-19dae4ec4218	29868da9-9dec-4cba-9066-19dae4ec4218_3	Plasmid	BSI	66908	50.07	ecloacae	90	NA	NA	NA	NA	NA	NA	IncFIA(HI1)_1_HI1,IncFII(pECLA)_1_pECLA	arsB-BAC0576,arsC-BAC0584,arsH-BAC0034,copG-BAC0717,pcoA-BAC0303,pcoB-BAC0304,pcoC-BAC0305,pcoD-BAC0306,pcoE-BAC0307,pcoR-BAC0308,pcoS-BAC0309,silA-BAC0341,silB-BAC0342,silC-BAC0343,silE-BAC0344,silF-BAC0345,silP-BAC0346,silR-BAC0347,silS-BAC0348	-	MPF_F	-	non-mobilizable	-	-	1	NA	NA	NA	NA	NA	NA	NA	NA	PRJNA604975	NA
OX-BSI-110_4	29868da9-9dec-4cba-9066-19dae4ec4218	29868da9-9dec-4cba-9066-19dae4ec4218_4	Plasmid	BSI	2496	51.52	ecloacae	90	NA	NA	NA	NA	NA	NA	ColRNAI_1	NA	-	-	MOB_unknown,MOBP	mobilizable	PTU-E52	III	0.5	NA	NA	NA	NA	NA	NA	NA	NA	PRJNA604975	NA
OX-BSI-110_1	29868da9-9dec-4cba-9066-19dae4ec4218	29868da9-9dec-4cba-9066-19dae4ec4218_chromo	Chromosome	BSI	4837536	55.45	ecloacae	90	NA	NA	NA	NA	blaACT-56,fosA	IS1X4,IS4321R,IS5,IS640,IS903B,ISKpn3,ISKpn8,ISPpu12,ISSba14	NA	acn-BAC0003,acrA-BAC0005,acrB-BAC0006,acrC-BAC0007,acrD/yffA-BAC0008,acrE/envC-BAC0009,acrF/envD-BAC0010,actP/yjcG-BAC0564,adeE-BAC0013,arsA-BAC0572,arsB-BAC0576,arsC-BAC0583,arsC-BAC0584,arsD-BAC0587,arsR-BAC0591,baeR-BAC0039,baeR-BAC0596,baeS-BAC0040,bepG-BAC0046,bfrA-BAC0048,bhsA/ycfR/comC-BAC0049,comR/ycfQ-BAC0076,copA-BAC0725,copR-BAC0719,corA-BAC0641,corB-BAC0643,corC-BAC0088,corD-BAC0644,c…	NA	NA	NA	NA	NA	NA	NA	NA	NA	NA	NA	NA	NA	NA	NA	PRJNA604975	NA
OX-BSI-110_2	29868da9-9dec-4cba-9066-19dae4ec4218	29868da9-9dec-4cba-9066-19dae4ec4218_2	Plasmid	BSI	298087	47.3	ecloacae	90	NA	NA	187	3	aac(3)-IIg,aac(6')-Ib3,aac(6')-IIc,aph(3'')-Ib,aph(6)-Id,arr,blaTEM-1,catA2,dfrA19,ere(A),qacEdelta1,sul1,sul2	IS1247,IS1B,IS4321R,IS5075,IS6100,ISEal1,ISKpn21,ISKpn26,ISKpn8,ISVsa3	IncHI2_1,IncHI2A_1,RepA_1_pKPC-CAV1321	arsB-BAC0576,arsC-BAC0584,arsH-BAC0034,cepA-BAC0061,dsbC-BAC0138,merA-BAC0652,merC-BAC0664,merD-BAC0666,merE-BAC0672,merP-BAC0678,merR-BAC0689,merT-BAC0233,ncrC-BAC0265,pbrA-BAC0298,pbrB/pbrC-BAC0299,pbrR-BAC0301,pcoE-BAC0307,pmrC-BAC0485,qacEdelta1-BAC0323,rcnR/yohL-BAC0332,terA-BAC0386,terB-BAC0387,terC-BAC0388,terE-BAC0390,terW-BAC0391,terZ-BAC0392	MOBH	MPF_F	MOBH	conjugative	PTU-HI2	IV	1	NA	NA	NA	NA	NA	NA	NA	NA	PRJNA604975	NA
OX-BSI-111_2	2ae575e3-f2cb-475b-b363-2aae7c927a17	2ae575e3-f2cb-475b-b363-2aae7c927a17_2	Plasmid	BSI	234398	50.31	kpneumoniae	661	NA	NA	183	3	NA	IS1400,ISEhe3,ISKpn2	IncFIB(K)_1_Kpn3,IncHI1B_1_pNDM-MAR	adeF-BAC0014,adeG-BAC0015,fabL/ygaA-BAC0158,nfsA-BAC0540,pstB-BAC0316,terA-BAC0386,terB-BAC0387,terC-BAC0388,terE-BAC0390,terW-BAC0391,terZ-BAC0392,ybtP-BAC0432,ybtQ-BAC0433	MOBH	MPF_F	-	conjugative	-	-	1	NA	NA	NA	2017-06-05	community	K84002	M	6	PRJNA604975	NA
OX-BSI-111_3	2ae575e3-f2cb-475b-b363-2aae7c927a17	2ae575e3-f2cb-475b-b363-2aae7c927a17_3	Plasmid	BSI	4083	49.33	kpneumoniae	661	NA	NA	21	29	NA	NA	Col8282_1	NA	MOBQ	-	MOBQ,MOBQ	mobilizable	PTU-E10	III	1	NA	NA	NA	2017-06-05	community	K84002	M	6	PRJNA604975	NA
OX-BSI-111_1	2ae575e3-f2cb-475b-b363-2aae7c927a17	2ae575e3-f2cb-475b-b363-2aae7c927a17_chromo	Chromosome	BSI	5249709	57.53	kpneumoniae	661	NA	NA	NA	NA	blaSHV-27,fosA,oqxA,oqxB25	IS1351,ISEhe3	NA	acn-BAC0003,acrA-BAC0005,acrB-BAC0006,acrC-BAC0007,acrD-BAC0563,acrE/envC-BAC0009,acrF/envD-BAC0010,actP/yjcG-BAC0564,adeE-BAC0013,arsB-BAC0578,arsC-BAC0582,arsC-BAC0583,arsR-BAC0589,baeR-BAC0596,baeS-BAC0040,bepG-BAC0046,bfrA-BAC0048,bhsA/ycfR/comC-BAC0049,cepA-BAC0061,chrA-BAC0026,chrB-BAC0027,comR/ycfQ-BAC0076,copA-BAC0725,corA-BAC0086,corB-BAC0643,corD-BAC0644,corR-BAC0089,cpxA-BAC0532,cueR/y…	NA	NA	NA	NA	NA	NA	NA	NA	NA	NA	2017-06-05	community	K84002	M	6	PRJNA604975	NA
OX-BSI-112_2	2b39f0a9-530e-4a5a-a333-bf95b89b27d4	2b39f0a9-530e-4a5a-a333-bf95b89b27d4_2	Plasmid	BSI	98752	47.27	ecoli	106	NA	NA	NA	NA	NA	NA	IncY_1	dsbA-BAC0136	-	-	-	non-mobilizable	PTU-Y	III	0.9524	NA	NA	NA	2018-11-16	community	K84033	F	75	PRJNA604975	SAMN18262942
OX-BSI-112_1	2b39f0a9-530e-4a5a-a333-bf95b89b27d4	2b39f0a9-530e-4a5a-a333-bf95b89b27d4_chromo	Chromosome	BSI	4915752	50.61	ecoli	106	NA	NA	NA	NA	NA	IS911,ISEc12,ISEc46,ISEc8,ISSd1	NA	acn-BAC0003,acrA-BAC0005,acrB-BAC0006,acrD/yffA-BAC0008,acrE/envC-BAC0009,acrF/envD-BAC0010,actP/yjcG-BAC0564,arsA-BAC0571,arsB-BAC0576,arsC-BAC0582,arsC-BAC0583,arsD-BAC0587,arsP-BAC0036,arsR-BAC0594,asr-BAC0038,baeS-BAC0040,bfrA-BAC0048,bhsA/ycfR/comC-BAC0049,comR/ycfQ-BAC0076,copA-BAC0725,copS-BAC0752,corA-BAC0086,corB-BAC0643,corD-BAC0644,cpxA-BAC0532,cueO-BAC0103,cueR/ybbI-BAC0105,cusA/ybdE-…	NA	NA	NA	NA	NA	NA	NA	NA	NA	NA	2018-11-16	community	K84033	F	75	PRJNA604975	SAMN18262942
OX-BSI-113_2	2b4d0bc7-315e-4a17-9eae-1d33d7892843	2b4d0bc7-315e-4a17-9eae-1d33d7892843_2	Plasmid	BSI	155419	53.66	kpneumoniae	17	NA	NA	16	37	aadA1,aph(3'')-Ib,aph(3')-Ia,aph(6)-Id,blaTEM-1,dfrA1,qacEdelta1,sul1,sul2	IS1F,IS1X3,IS903B,ISEcl1,ISKpn21,ISKpn28	IncFIB(K)_1_Kpn3,IncFII_1_pKP91	arsA-BAC0571,arsB-BAC0578,arsC-BAC0584,arsH-BAC0034,arsR-BAC0589,copG-BAC0717,fecE-BAC0164,pcoA-BAC0303,pcoB-BAC0304,pcoC-BAC0305,pcoD-BAC0306,pcoE-BAC0307,pcoR-BAC0308,pcoS-BAC0309,qacEdelta1-BAC0323,silA-BAC0341,silB-BAC0342,silC-BAC0343,silE-BAC0344,silF-BAC0345,silP-BAC0346,silR-BAC0347,silS-BAC0348,yfeB-BAC0440	MOBF,MOBF	MPF_T	-	conjugative	PTU-FK	III	0.9688	NA	NA	NA	2017-04-04	healthcare associated 31-365d	K84038	M	93	PRJNA604975	NA
OX-BSI-113_3	2b4d0bc7-315e-4a17-9eae-1d33d7892843	2b4d0bc7-315e-4a17-9eae-1d33d7892843_3	Plasmid	BSI	4660	43.95	kpneumoniae	17	NA	NA	NA	NA	NA	NA	Col440I_1	NA	-	-	-	non-mobilizable	PTU-?	II	0.6	NA	NA	NA	2017-04-04	healthcare associated 31-365d	K84038	M	93	PRJNA604975	NA
OX-BSI-113_4	2b4d0bc7-315e-4a17-9eae-1d33d7892843	2b4d0bc7-315e-4a17-9eae-1d33d7892843_4	Plasmid	BSI	3262	46.63	kpneumoniae	17	NA	NA	NA	NA	NA	NA	ColRNAI_1	NA	-	-	MOBP	mobilizable	-	-	1	NA	NA	NA	2017-04-04	healthcare associated 31-365d	K84038	M	93	PRJNA604975	NA
OX-BSI-113_1	2b4d0bc7-315e-4a17-9eae-1d33d7892843	2b4d0bc7-315e-4a17-9eae-1d33d7892843_chromo	Chromosome	BSI	5199422	57.55	kpneumoniae	17	NA	NA	NA	NA	blaCMY,blaCMY-2,blaSHV-11,fosA,oqxA,oqxB25	IS1351,ISEcl1,ISKpn21,ISKpn28	NA	acn-BAC0003,acrA-BAC0005,acrB-BAC0006,acrC-BAC0007,acrD-BAC0563,acrE/envC-BAC0009,acrF/envD-BAC0010,actP/yjcG-BAC0564,adeE-BAC0013,arsB-BAC0578,arsC-BAC0582,arsC-BAC0583,arsR-BAC0589,baeR-BAC0596,baeS-BAC0040,bepG-BAC0046,bfrA-BAC0048,bhsA/ycfR/comC-BAC0049,cepA-BAC0061,chrA-BAC0026,chrB-BAC0027,comR/ycfQ-BAC0076,copA-BAC0725,corA-BAC0086,corB-BAC0643,corD-BAC0644,corR-BAC0089,cpxA-BAC0532,cueR/y…	NA	NA	NA	NA	NA	NA	NA	NA	NA	NA	2017-04-04	healthcare associated 31-365d	K84038	M	93	PRJNA604975	NA
OX-BSI-114_4	2bb315ce-6907-4f03-9416-982c07d47256	2bb315ce-6907-4f03-9416-982c07d47256_4	Plasmid	BSI	5165	47.47	ecoli	14	NA	NA	4	69	NA	NA	Col156_1	NA	MOBQ	-	-	mobilizable	PTU-E7	III	1	NA	NA	NA	2018-11-05	nosocomial	K82029	M	68	PRJNA604975	SAMN18262937
OX-BSI-114_5	2bb315ce-6907-4f03-9416-982c07d47256	2bb315ce-6907-4f03-9416-982c07d47256_5	Plasmid	BSI	4082	49.41	ecoli	14	NA	NA	21	29	NA	NA	Col8282_1	NA	MOBQ	-	MOBQ,MOBQ	mobilizable	PTU-E10	III	1	NA	NA	NA	2018-11-05	nosocomial	K82029	M	68	PRJNA604975	SAMN18262937
OX-BSI-114_6	2bb315ce-6907-4f03-9416-982c07d47256	2bb315ce-6907-4f03-9416-982c07d47256_6	Plasmid	BSI	1552	51.8	ecoli	14	NA	NA	6	62	NA	NA	Col(MG828)_1	NA	-	-	MOB_unknown	mobilizable	PTU-E9	VI	1	NA	NA	NA	2018-11-05	nosocomial	K82029	M	68	PRJNA604975	SAMN18262937
OX-BSI-114_1	2bb315ce-6907-4f03-9416-982c07d47256	2bb315ce-6907-4f03-9416-982c07d47256_chromo	Chromosome	BSI	5052081	50.53	ecoli	14	NA	NA	NA	NA	blaEC-5	IS1F,IS30,IS609,IS621,ISEc21,ISEc40,ISEc42,ISEc8,ISEcl1,ISErsp1,ISSd1	NA	acn-BAC0003,acrA-BAC0005,acrD/yffA-BAC0008,acrE/envC-BAC0009,acrF/envD-BAC0010,actP/yjcG-BAC0564,arsC-BAC0582,arsC-BAC0583,asr-BAC0038,baeS-BAC0040,bfrA-BAC0048,bhsA/ycfR/comC-BAC0049,comR/ycfQ-BAC0076,copA-BAC0725,copS-BAC0752,corA-BAC0086,corB-BAC0643,corD-BAC0644,cpxA-BAC0532,cueO-BAC0103,cueR/ybbI-BAC0105,cusA/ybdE-BAC0107,cusB-BAC0108,cusC/ylcB-BAC0109,cusF/cusX-BAC0110,cusR/ylcA-BAC0111,cus…	NA	NA	NA	NA	NA	NA	NA	NA	NA	NA	2018-11-05	nosocomial	K82029	M	68	PRJNA604975	SAMN18262937
OX-BSI-114_2	2bb315ce-6907-4f03-9416-982c07d47256	2bb315ce-6907-4f03-9416-982c07d47256_2	Plasmid	BSI	69922	50.9	ecoli	14	NA	NA	12	42	NA	NA	IncFII(pHN7A8)_1_pHN7A8	NA	MOBF	MPF_F	MOBF	conjugative	PTU-FE	III	0.9882	NA	NA	NA	2018-11-05	nosocomial	K82029	M	68	PRJNA604975	SAMN18262937
OX-BSI-114_3	2bb315ce-6907-4f03-9416-982c07d47256	2bb315ce-6907-4f03-9416-982c07d47256_3	Plasmid	BSI	5631	47.36	ecoli	14	NA	NA	11	43	NA	NA	ColRNAI_1	NA	MOBP	-	MOBP	mobilizable	PTU-E22	I	1	NA	NA	NA	2018-11-05	nosocomial	K82029	M	68	PRJNA604975	SAMN18262937
OX-BSI-115_1	2bb55f31-9780-4851-9ea1-437573f97e6b	2bb55f31-9780-4851-9ea1-437573f97e6b_chromo	Chromosome	BSI	5013094	50.54	ecoli	73	NA	NA	NA	NA	blaEC-5	IS1F,IS630,IS682,ISEc17,ISEc20,ISEc21,ISEc31,ISEc40,ISEc41,ISEc42	NA	acn-BAC0003,acrA-BAC0005,acrD/yffA-BAC0008,acrE/envC-BAC0009,acrF/envD-BAC0010,actP/yjcG-BAC0564,arsC-BAC0582,arsC-BAC0583,asr-BAC0038,baeS-BAC0040,bfrA-BAC0048,bhsA/ycfR/comC-BAC0049,comR/ycfQ-BAC0076,copA-BAC0725,corA-BAC0086,corB-BAC0643,corD-BAC0644,cpxA-BAC0532,cueO-BAC0103,cueR/ybbI-BAC0105,cusA/ybdE-BAC0107,cusB-BAC0108,cusC/ylcB-BAC0109,cusF/cusX-BAC0110,cusR/ylcA-BAC0111,cusS-BAC0112,cut…	NA	NA	NA	NA	NA	NA	NA	NA	NA	NA	2018-11-29	healthcare associated 0-30d	K84027	M	91	PRJNA604975	SAMN18262936
OX-BSI-115_3	2bb55f31-9780-4851-9ea1-437573f97e6b	2bb55f31-9780-4851-9ea1-437573f97e6b_3	Plasmid	BSI	6077	49.02	ecoli	73	NA	NA	24	25	NA	NA	NA	NA	MOBQ	-	-	mobilizable	PTU-E7	III	1	NA	NA	NA	2018-11-29	healthcare associated 0-30d	K84027	M	91	PRJNA604975	SAMN18262936
OX-BSI-115_2	2bb55f31-9780-4851-9ea1-437573f97e6b	2bb55f31-9780-4851-9ea1-437573f97e6b_2	Plasmid	BSI	34736	40.81	ecoli	73	218	2	NA	NA	NA	NA	NA	triA-BAC0396,triC-BAC0398	MOBP	-	-	mobilizable	-	-	1	NA	NA	NA	2018-11-29	healthcare associated 0-30d	K84027	M	91	PRJNA604975	SAMN18262936
OX-BSI-116_2	2bbace60-69b0-4521-b60e-5b37013e2d29	2bbace60-69b0-4521-b60e-5b37013e2d29_2	Plasmid	BSI	111917	49.66	ecoli	421	NA	NA	NA	NA	NA	ISEc10,ISEc12,ISEc53	IncFIB(AP001918)_1,IncFIC(FII)_1	smdA-BAC0353	MOBF	MPF_F	MOBF	conjugative	PTU-FE	III	0.6905	NA	NA	NA	2009-09-08	healthcare associated 31-365d	K84034	F	1	PRJNA604975	SAMN18262935
OX-BSI-116_3	2bbace60-69b0-4521-b60e-5b37013e2d29	2bbace60-69b0-4521-b60e-5b37013e2d29_3	Plasmid	BSI	24242	42.49	ecoli	421	NA	NA	143	4	NA	NA	NA	triA-BAC0396,triC-BAC0398	MOBC	MPF_T	-	conjugative	-	-	1	NA	NA	NA	2009-09-08	healthcare associated 31-365d	K84034	F	1	PRJNA604975	SAMN18262935
OX-BSI-116_1	2bbace60-69b0-4521-b60e-5b37013e2d29	2bbace60-69b0-4521-b60e-5b37013e2d29_chromo	Chromosome	BSI	5015463	50.56	ecoli	421	NA	NA	NA	NA	NA	IS1397,IS150,IS200C,ISEc16,ISEc23,ISEc38,ISEc48,ISKpn26	NA	acn-BAC0003,acrA-BAC0005,acrB-BAC0006,acrD/yffA-BAC0008,acrE/envC-BAC0009,acrF/envD-BAC0010,actP/yjcG-BAC0564,adeE-BAC0013,arsC-BAC0582,arsC-BAC0583,asr-BAC0038,baeS-BAC0040,bfrA-BAC0048,bhsA/ycfR/comC-BAC0049,comR/ycfQ-BAC0076,copA-BAC0725,corA-BAC0086,corB-BAC0643,corD-BAC0644,cpxA-BAC0532,cueO-BAC0103,cueR/ybbI-BAC0105,cusA/ybdE-BAC0107,cusB-BAC0108,cusC/ylcB-BAC0109,cusF/cusX-BAC0110,cusR/ylc…	NA	NA	NA	NA	NA	NA	NA	NA	NA	NA	2009-09-08	healthcare associated 31-365d	K84034	F	1	PRJNA604975	SAMN18262935
OX-BSI-117_3	2bcb48ca-133b-4c9d-a7bc-da1e86587299	2bcb48ca-133b-4c9d-a7bc-da1e86587299_3	Plasmid	BSI	51257	51.47	kpneumoniae	147	NA	NA	NA	NA	aac(3)-IIe,aac(6')-Ib-cr5,blaCTX-M-15,blaOXA-1,catB3,dfrA14	IS6100,ISKpn11,ISKpn14	IncFIA(HI1)_1_HI1,IncR_1	NA	-	-	MOBF	mobilizable	PTU-R	I	0.8	NA	NA	NA	2011-06-10	nosocomial	K84080	M	70	PRJNA604975	NA
OX-BSI-117_4	2bcb48ca-133b-4c9d-a7bc-da1e86587299	2bcb48ca-133b-4c9d-a7bc-da1e86587299_4	Plasmid	BSI	4168	41.51	kpneumoniae	147	NA	NA	188	3	NA	NA	Col440I_1	NA	-	-	-	non-mobilizable	PTU-?	II	0.6667	NA	NA	NA	2011-06-10	nosocomial	K84080	M	70	PRJNA604975	NA
OX-BSI-117_2	2bcb48ca-133b-4c9d-a7bc-da1e86587299	2bcb48ca-133b-4c9d-a7bc-da1e86587299_2	Plasmid	BSI	188804	50.45	kpneumoniae	147	NA	NA	19	33	NA	ISCro1,ISEc36,ISEc8,ISEcl1,ISKox1,ISKpn2,ISKpn26,ISSen3,ISSty2,ISVsa5	IncFIB(K)_1_Kpn3	copG-BAC0717,pcoA-BAC0303,pcoB-BAC0304,pcoC-BAC0305,pcoD-BAC0306,pcoE-BAC0307,pcoR-BAC0308,pcoS-BAC0309,pstB-BAC0316,silA-BAC0341,silB-BAC0342,silC-BAC0343,silE-BAC0344,silF-BAC0345,silP-BAC0346,silR-BAC0347,silS-BAC0348	-	-	-	non-mobilizable	PTU-E35	I	1	NA	NA	NA	2011-06-10	nosocomial	K84080	M	70	PRJNA604975	NA
OX-BSI-117_1	2bcb48ca-133b-4c9d-a7bc-da1e86587299	2bcb48ca-133b-4c9d-a7bc-da1e86587299_chromo	Chromosome	BSI	5304404	57.44	kpneumoniae	147	NA	NA	NA	NA	blaSHV-11,fosA,oqxA,oqxB	IS3000,ISEc10	NA	acn-BAC0003,acrA-BAC0005,acrB-BAC0006,acrC-BAC0007,acrD-BAC0563,acrE/envC-BAC0009,acrF/envD-BAC0010,actP/yjcG-BAC0564,adeE-BAC0013,arsB-BAC0578,arsC-BAC0582,arsC-BAC0583,arsR-BAC0589,baeR-BAC0596,baeS-BAC0040,bepG-BAC0046,bfrA-BAC0048,bhsA/ycfR/comC-BAC0049,cepA-BAC0061,chrA-BAC0026,chrB-BAC0027,comR/ycfQ-BAC0076,copA-BAC0725,corA-BAC0086,corB-BAC0643,corD-BAC0644,cpxA-BAC0532,cueR/ybbI-BAC0105,c…	NA	NA	NA	NA	NA	NA	NA	NA	NA	NA	2011-06-10	nosocomial	K84080	M	70	PRJNA604975	NA
OX-BSI-118_2	2bcdf6bf-8da7-4ea6-aa43-5e4fe899f1e3	2bcdf6bf-8da7-4ea6-aa43-5e4fe899f1e3_2	Plasmid	BSI	84404	51.31	ecoli	73	NA	NA	15	38	aadA1,qacEdelta1,sul1	IS1R,IS26	IncFIB(AP001918)_1,IncFIC(FII)_1	qacEdelta1-BAC0323	MOBF,MOBP	MPF_F	MOBF	conjugative	PTU-FE	III	1	NA	NA	NA	2009-05-26	healthcare associated 0-30d	M84025	F	72	PRJNA604975	SAMN18262934
OX-BSI-118_1	2bcdf6bf-8da7-4ea6-aa43-5e4fe899f1e3	2bcdf6bf-8da7-4ea6-aa43-5e4fe899f1e3_chromo	Chromosome	BSI	5186691	50.51	ecoli	73	NA	NA	NA	NA	blaEC-5	IS1203,IS200C,IS30,IS629,IS630,IS682,ISEc13,ISEc16,ISEc20,ISEc39,ISEc41,ISEc42,ISEc45	NA	acn-BAC0003,acrA-BAC0005,acrB-BAC0006,acrD/yffA-BAC0008,acrE/envC-BAC0009,acrF/envD-BAC0010,actP/yjcG-BAC0564,arsC-BAC0582,arsC-BAC0583,asr-BAC0038,baeS-BAC0040,bfrA-BAC0048,bhsA/ycfR/comC-BAC0049,comR/ycfQ-BAC0076,copA-BAC0725,corA-BAC0086,corB-BAC0643,corD-BAC0644,cpxA-BAC0532,cueO-BAC0103,cueR/ybbI-BAC0105,cusA/ybdE-BAC0107,cusB-BAC0108,cusC/ylcB-BAC0109,cusF/cusX-BAC0110,cusR/ylcA-BAC0111,cus…	NA	NA	NA	NA	NA	NA	NA	NA	NA	NA	2009-05-26	healthcare associated 0-30d	M84025	F	72	PRJNA604975	SAMN18262934
OX-BSI-118_3	2bcdf6bf-8da7-4ea6-aa43-5e4fe899f1e3	2bcdf6bf-8da7-4ea6-aa43-5e4fe899f1e3_3	Plasmid	BSI	71753	50.7	ecoli	73	NA	NA	12	42	blaTEM-1	Tn3	IncFIC(FII)_1	NA	MOBF	MPF_F	MOBF	conjugative	PTU-FE	III	1	NA	NA	NA	2009-05-26	healthcare associated 0-30d	M84025	F	72	PRJNA604975	SAMN18262934
OX-BSI-119_2	2c0269fe-7122-4a79-ada6-8a679108e850	2c0269fe-7122-4a79-ada6-8a679108e850_2	Plasmid	BSI	114236	51.02	ecoli	73	NA	NA	1	123	NA	IS100kyp,IS21,IS26,ISEc10,ISEc53	Col156_1,IncFIB(AP001918)_1,IncFII(29)_1_pUTI89	NA	MOBF,MOBP	MPF_F	MOBF	conjugative	PTU-FE	III	1	NA	NA	NA	2009-06-05	healthcare associated 0-30d	K84027	F	64	PRJNA604975	SAMN18262932
OX-BSI-119_1	2c0269fe-7122-4a79-ada6-8a679108e850	2c0269fe-7122-4a79-ada6-8a679108e850_chromo	Chromosome	BSI	5200357	50.57	ecoli	73	NA	NA	NA	NA	blaEC-5	IS100kyp,IS1203,IS1F,IS200C,IS30,IS3411,IS630,IS682,ISEc13,ISEc16,ISEc17,ISEc20,ISEc39,ISEc41,ISEc42	NA	acn-BAC0003,acrA-BAC0005,acrB-BAC0006,acrD/yffA-BAC0008,acrE/envC-BAC0009,acrF/envD-BAC0010,actP/yjcG-BAC0564,arsC-BAC0582,arsC-BAC0583,asr-BAC0038,baeS-BAC0040,bfrA-BAC0048,bhsA/ycfR/comC-BAC0049,comR/ycfQ-BAC0076,copA-BAC0725,corA-BAC0086,corB-BAC0643,corD-BAC0644,cpxA-BAC0532,cueO-BAC0103,cueR/ybbI-BAC0105,cusA/ybdE-BAC0107,cusB-BAC0108,cusC/ylcB-BAC0109,cusF/cusX-BAC0110,cusR/ylcA-BAC0111,cus…	NA	NA	NA	NA	NA	NA	NA	NA	NA	NA	2009-06-05	healthcare associated 0-30d	K84027	F	64	PRJNA604975	SAMN18262932
OX-BSI-120_2	2c11aa2e-b253-495a-aae7-8b3ca2de1872	2c11aa2e-b253-495a-aae7-8b3ca2de1872_2	Plasmid	BSI	144456	51.82	ecoli	131	NA	NA	1	123	aac(3)-IId,aadA5,aph(3'')-Ib,aph(6)-Id,blaTEM-1,dfrA17,mph(A),qacEdelta1,sul1,sul2,tet(A)	IS100kyp,IS1R,IS21,IS26,IS6100,ISCfr1,ISEc53,ISVsa5	Col156_1,IncFIB(AP001918)_1,IncFII(29)_1_pUTI89	blt-BAC0050,qacEdelta1-BAC0323	MOBF,MOBP	MPF_F	MOBF	conjugative	PTU-FE	III	1	NA	NA	NA	2017-09-05	healthcare associated 0-30d	K84041	M	52	PRJNA604975	SAMN18262931
OX-BSI-120_1	2c11aa2e-b253-495a-aae7-8b3ca2de1872	2c11aa2e-b253-495a-aae7-8b3ca2de1872_chromo	Chromosome	BSI	4893132	50.79	ecoli	131	NA	NA	NA	NA	NA	IS100kyp,IS1397,IS150,IS2,IS609,ISEc1,ISEc10,ISEc20,ISEc38,ISEc40,ISEc8	NA	acn-BAC0003,acrA-BAC0005,acrD/yffA-BAC0008,acrE/envC-BAC0009,acrF/envD-BAC0010,actP/yjcG-BAC0564,arsC-BAC0582,arsC-BAC0583,asr-BAC0038,baeS-BAC0040,bfrA-BAC0048,bhsA/ycfR/comC-BAC0049,comR/ycfQ-BAC0076,copA-BAC0725,corA-BAC0086,corB-BAC0643,corD-BAC0644,cpxA-BAC0532,cueO-BAC0103,cueR/ybbI-BAC0105,cusA/ybdE-BAC0107,cusB-BAC0108,cusC/ylcB-BAC0109,cusF/cusX-BAC0110,cusR/ylcA-BAC0111,cusS-BAC0112,cut…	NA	NA	NA	NA	NA	NA	NA	NA	NA	NA	2017-09-05	healthcare associated 0-30d	K84041	M	52	PRJNA604975	SAMN18262931
OX-BSI-121_2	2c3757fc-83c0-4398-9b28-e81d6ef064a3	2c3757fc-83c0-4398-9b28-e81d6ef064a3_2	Plasmid	BSI	203484	51.44	kpneumoniae	661	NA	NA	NA	NA	NA	IS186B,IS1A,IS1X2,ISKpn21,ISKpn26,ISKpn34	IncFIB(K)_1_Kpn3,IncFII_1_pKP91	adeL-BAC0508,arsA-BAC0571,arsB-BAC0578,arsC-BAC0584,arsD-BAC0587,arsR-BAC0589,cepA-BAC0061,copG-BAC0717,emrAsm-BAC0499,emrCsm-BAC0501,fabL/ygaA-BAC0158,pcoA-BAC0303,pcoB-BAC0304,pcoC-BAC0305,pcoD-BAC0306,pcoE-BAC0307,pcoR-BAC0308,pcoS-BAC0309,silA-BAC0341,silB-BAC0342,silC-BAC0343,silE-BAC0344,silF-BAC0345,silP-BAC0346,silR-BAC0347,silS-BAC0348	MOBF,MOBF	MPF_F	-	conjugative	PTU-FK	III	0.9766	NA	NA	NA	NA	NA	NA	NA	NA	PRJNA604975	NA
OX-BSI-121_1	2c3757fc-83c0-4398-9b28-e81d6ef064a3	2c3757fc-83c0-4398-9b28-e81d6ef064a3_chromo	Chromosome	BSI	5099663	57.7	kpneumoniae	661	NA	NA	NA	NA	blaSHV-27,fosA,oqxA10,oqxB25	IS1351,ISKpn1,ISKpn21	NA	acn-BAC0003,acrA-BAC0005,acrB-BAC0006,acrC-BAC0007,acrD-BAC0563,acrE/envC-BAC0009,acrF/envD-BAC0010,actP/yjcG-BAC0564,adeE-BAC0013,arsB-BAC0578,arsC-BAC0582,arsC-BAC0583,arsR-BAC0589,baeR-BAC0596,baeS-BAC0040,bepG-BAC0046,bfrA-BAC0048,bhsA/ycfR/comC-BAC0049,cepA-BAC0061,chrA-BAC0026,chrB-BAC0027,comR/ycfQ-BAC0076,copA-BAC0725,corA-BAC0086,corB-BAC0643,corD-BAC0644,corR-BAC0089,cpxA-BAC0532,cueR/y…	NA	NA	NA	NA	NA	NA	NA	NA	NA	NA	NA	NA	NA	NA	NA	PRJNA604975	NA
OX-BSI-122_2	2c4dd5f0-c217-489c-a22b-850894fc31fb	2c4dd5f0-c217-489c-a22b-850894fc31fb_2	Plasmid	BSI	113323	53.04	ecloacae	168	NA	NA	42	14	NA	IS1A,IS1X4	IncFIB(pECLA)_1_pECLA,IncFII(pECLA)_1_pECLA	copG-BAC0717,fecE-BAC0164,pcoA-BAC0303,pcoB-BAC0304,pcoC-BAC0305,pcoD-BAC0306,pcoE-BAC0307,pcoR-BAC0308,pcoS-BAC0309,silA-BAC0341,silB-BAC0342,silC-BAC0343,silE-BAC0344,silF-BAC0345,silP-BAC0346,silR-BAC0347,silS-BAC0348	-	MPF_F	-	non-mobilizable	PTU-E60	II	1	NA	NA	NA	NA	NA	NA	NA	NA	PRJNA604975	NA
OX-BSI-122_5	2c4dd5f0-c217-489c-a22b-850894fc31fb	2c4dd5f0-c217-489c-a22b-850894fc31fb_5	Plasmid	BSI	3341	46.21	ecloacae	168	NA	NA	88	7	NA	NA	ColRNAI_1	NA	-	-	-	non-mobilizable	PTU-?	II	0.6	NA	NA	NA	NA	NA	NA	NA	NA	PRJNA604975	NA
OX-BSI-122_1	2c4dd5f0-c217-489c-a22b-850894fc31fb	2c4dd5f0-c217-489c-a22b-850894fc31fb_chromo	Chromosome	BSI	4918918	55.07	ecloacae	168	NA	NA	NA	NA	blaACT-23,fosA,oqxA,oqxB	IS1X4,ISEal1,ISEc21,ISKpn8	NA	acn-BAC0003,acrA-BAC0005,acrB-BAC0006,acrC-BAC0007,acrD/yffA-BAC0008,acrE/envC-BAC0009,acrF/envD-BAC0010,acrR/ybaH-BAC0011,actP/yjcG-BAC0564,adeE-BAC0013,arsB-BAC0578,arsC-BAC0582,arsC-BAC0583,baeR-BAC0596,baeS-BAC0040,bepG-BAC0046,bfrA-BAC0048,bhsA/ycfR/comC-BAC0049,comR/ycfQ-BAC0076,copA-BAC0725,corA-BAC0641,corB-BAC0643,corC-BAC0088,corD-BAC0644,cpxA-BAC0532,cueR/ybbI-BAC0105,cusA/ybdE-BAC0107…	NA	NA	NA	NA	NA	NA	NA	NA	NA	NA	NA	NA	NA	NA	NA	PRJNA604975	NA
OX-BSI-122_3	2c4dd5f0-c217-489c-a22b-850894fc31fb	2c4dd5f0-c217-489c-a22b-850894fc31fb_3	Plasmid	BSI	85753	52.11	ecloacae	168	NA	NA	144	4	NA	IS1X2	IncFIA(HI1)_1_HI1	NA	-	-	MOBF	mobilizable	-	-	1	NA	NA	NA	NA	NA	NA	NA	NA	PRJNA604975	NA
OX-BSI-122_4	2c4dd5f0-c217-489c-a22b-850894fc31fb	2c4dd5f0-c217-489c-a22b-850894fc31fb_4	Plasmid	BSI	4096	55.49	ecloacae	168	NA	NA	48	13	NA	NA	Col440I_1,Col440II_1	NA	MOBP,MOBP	-	MOBP	mobilizable	-	-	1	NA	NA	NA	NA	NA	NA	NA	NA	PRJNA604975	NA
OX-BSI-123_1	2cb87762-b451-4d39-a43a-ced1d6952b47	2cb87762-b451-4d39-a43a-ced1d6952b47_chromo	Chromosome	BSI	4910643	50.53	ecoli	372	NA	NA	NA	NA	NA	IS1397,IS621,IS630,ISEc39,ISEc42,ISEc47,ISSfl8	pENTAS02_1	acn-BAC0003,acrA-BAC0005,acrD/yffA-BAC0008,acrE/envC-BAC0009,acrF/envD-BAC0010,actP/yjcG-BAC0564,arsC-BAC0582,asr-BAC0038,baeS-BAC0040,bfrA-BAC0048,bhsA/ycfR/comC-BAC0049,comR/ycfQ-BAC0076,copA-BAC0725,corA-BAC0086,corB-BAC0643,corD-BAC0644,cpxA-BAC0532,cueO-BAC0103,cueR/ybbI-BAC0105,cusA/ybdE-BAC0107,cusB-BAC0108,cusC/ylcB-BAC0109,cusF/cusX-BAC0110,cusR/ylcA-BAC0111,cusS-BAC0112,cutA-BAC0113,cut…	NA	NA	NA	NA	NA	NA	NA	NA	NA	NA	2018-03-21	healthcare associated 31-365d	K84027	M	86	PRJNA604975	SAMN18262925
OX-BSI-123_2	2cb87762-b451-4d39-a43a-ced1d6952b47	2cb87762-b451-4d39-a43a-ced1d6952b47_2	Plasmid	BSI	5463	47.21	ecoli	372	NA	NA	99	6	NA	NA	Col156_1	NA	MOBQ	-	-	mobilizable	PTU-E7	III	1	NA	NA	NA	2018-03-21	healthcare associated 31-365d	K84027	M	86	PRJNA604975	SAMN18262925
OX-BSI-124_2	2d34f0da-9a36-493e-ab88-99f8618fddd2	2d34f0da-9a36-493e-ab88-99f8618fddd2_2	Plasmid	BSI	2894	47.96	ecloacae	148	NA	NA	NA	NA	NA	NA	ColRNAI_1	NA	-	-	-	non-mobilizable	-	-	1	NA	NA	NA	NA	NA	NA	NA	NA	PRJNA604975	NA
OX-BSI-124_3	2d34f0da-9a36-493e-ab88-99f8618fddd2	2d34f0da-9a36-493e-ab88-99f8618fddd2_3	Plasmid	BSI	2495	51.46	ecloacae	148	NA	NA	28	21	NA	NA	ColRNAI_1	NA	-	-	MOB_unknown	mobilizable	-	-	1	NA	NA	NA	NA	NA	NA	NA	NA	PRJNA604975	NA
OX-BSI-124_1	2d34f0da-9a36-493e-ab88-99f8618fddd2	2d34f0da-9a36-493e-ab88-99f8618fddd2_chromo	Chromosome	BSI	4951576	55.16	ecloacae	148	NA	NA	NA	NA	aac(3)-IIe,aac(6')-Ib-cr5,aadA1,aph(3'')-Ib,aph(6)-Id,blaACT,blaCTX-M-15,blaOXA-1,blaTEM-1,catA1,catB3,dfrA14,oqxA,oqxB,qnrB1,sul2,tet(A)	IS102,IS1B,IS3000,IS4321L,IS5075,IS6100,ISEal1,ISEc9,ISKox1,ISKpn11	IncFIB(K)_1_Kpn3,IncFII(Yp)_1_Yersenia	acn-BAC0003,acrA-BAC0005,acrB-BAC0006,acrC-BAC0007,acrD-BAC0563,acrE/envC-BAC0009,acrF/envD-BAC0010,actP/yjcG-BAC0564,adeE-BAC0013,arsB-BAC0576,arsB-BAC0578,arsC-BAC0582,arsC-BAC0583,arsC-BAC0584,arsH-BAC0034,baeR-BAC0039,baeR-BAC0596,baeS-BAC0040,bepG-BAC0046,bfrA-BAC0048,bhsA/ycfR/comC-BAC0049,blt-BAC0050,comR/ycfQ-BAC0076,copA-BAC0725,copG-BAC0717,copR-BAC0719,corA-BAC0641,corB-BAC0643,corC-BA…	NA	NA	NA	NA	NA	NA	NA	NA	NA	NA	NA	NA	NA	NA	NA	PRJNA604975	NA
OX-BSI-125_3	2d38365b-46ca-4154-a524-2c395cc0495f	2d38365b-46ca-4154-a524-2c395cc0495f_3	Plasmid	BSI	6222	52.48	ecoli	394	NA	NA	38	15	aph(3'')-Ib,aph(6)-Id,sul2	NA	ColRNAI_1	NA	-	-	MOBP	mobilizable	PTU-E52	III	0.6	NA	NA	NA	2009-06-09	nosocomial	K82008	M	69	PRJNA604975	SAMN18262921
OX-BSI-125_1	2d38365b-46ca-4154-a524-2c395cc0495f	2d38365b-46ca-4154-a524-2c395cc0495f_chromo	Chromosome	BSI	5208508	50.6	ecoli	394	NA	NA	NA	NA	aadA1,dfrA1,sat2	IS1203,IS1351,IS30,IS629,IS911,ISEc46,ISEc8,ISSd1	NA	acn-BAC0003,acrA-BAC0005,acrB-BAC0006,acrD/yffA-BAC0008,acrE/envC-BAC0009,acrF/envD-BAC0010,actP/yjcG-BAC0564,arsA-BAC0571,arsB-BAC0576,arsC-BAC0582,arsC-BAC0583,arsD-BAC0587,arsP-BAC0036,arsR-BAC0594,asr-BAC0038,baeS-BAC0040,bfrA-BAC0048,bhsA/ycfR/comC-BAC0049,comR/ycfQ-BAC0076,copA-BAC0725,copG-BAC0717,copS-BAC0752,corA-BAC0086,corB-BAC0643,corD-BAC0644,cpxA-BAC0532,cueO-BAC0103,cueR/ybbI-BAC01…	NA	NA	NA	NA	NA	NA	NA	NA	NA	NA	2009-06-09	nosocomial	K82008	M	69	PRJNA604975	SAMN18262921
OX-BSI-125_4	2d38365b-46ca-4154-a524-2c395cc0495f	2d38365b-46ca-4154-a524-2c395cc0495f_4	Plasmid	BSI	2090	47.18	ecoli	394	NA	NA	22	29	NA	NA	Col(BS512)_1	NA	-	-	-	non-mobilizable	PTU-E47	III	1	NA	NA	NA	2009-06-09	nosocomial	K82008	M	69	PRJNA604975	SAMN18262921
OX-BSI-125_2	2d38365b-46ca-4154-a524-2c395cc0495f	2d38365b-46ca-4154-a524-2c395cc0495f_2	Plasmid	BSI	151042	50.82	ecoli	394	NA	NA	30	21	blaTEM-1,tet(B)	IS100kyp,IS629,ISCro1,ISKpn26,ISSm1,Tn3	Col156_1,IncFIA_1,IncFIB(AP001918)_1,IncFIC(FII)_1	blt-BAC0050,sitA-BAC0349,sitB-BAC0350,sitC-BAC0351,sitD-BAC0352	MOBF,MOBP	MPF_F	MOBF	conjugative	PTU-FE	III	0.9941	NA	NA	NA	2009-06-09	nosocomial	K82008	M	69	PRJNA604975	SAMN18262921
OX-BSI-126_1	2d643cef-a5db-4f38-bf56-b50abcda6c91	2d643cef-a5db-4f38-bf56-b50abcda6c91_chromo	Chromosome	BSI	5288922	50.49	ecoli	73	NA	NA	NA	NA	blaEC-5	IS100kyp,IS1203,IS1F,IS1R,IS200C,IS30,IS630,IS682,ISEc10,ISEc13,ISEc16,ISEc17,ISEc20,ISEc21,ISEc31,ISEc39,ISEc41,ISEc42,ISEc48	NA	acn-BAC0003,acrA-BAC0005,acrB-BAC0006,acrD/yffA-BAC0008,acrE/envC-BAC0009,acrF/envD-BAC0010,actP/yjcG-BAC0564,adeE-BAC0013,arsC-BAC0582,arsC-BAC0583,asr-BAC0038,baeS-BAC0040,bfrA-BAC0048,bhsA/ycfR/comC-BAC0049,comR/ycfQ-BAC0076,copA-BAC0725,corA-BAC0086,corB-BAC0643,corD-BAC0644,cpxA-BAC0532,cueO-BAC0103,cueR/ybbI-BAC0105,cusA/ybdE-BAC0107,cusB-BAC0108,cusC/ylcB-BAC0109,cusF/cusX-BAC0110,cusS-BAC…	NA	NA	NA	NA	NA	NA	NA	NA	NA	NA	2015-09-27	healthcare associated 0-30d	K84006	F	85	PRJNA604975	SAMN18262920
OX-BSI-126_2	2d643cef-a5db-4f38-bf56-b50abcda6c91	2d643cef-a5db-4f38-bf56-b50abcda6c91_2	Plasmid	BSI	129352	51.46	ecoli	73	NA	NA	5	68	blaTEM-1,tet(B)	IS100kyp,IS1326,IS1353,IS150,ISKpn26,ISVsa5,Tn3	Col156_1,IncFIA_1,IncFIB(pB171)_1_pB171	blt-BAC0050,merA-BAC0652,merC-BAC0664,merD-BAC0666,merE-BAC0670,merP-BAC0678,merR-BAC0232,merT-BAC0693	MOBF	MPF_F	MOBF	conjugative	PTU-FE	III	0.6905	NA	NA	NA	2015-09-27	healthcare associated 0-30d	K84006	F	85	PRJNA604975	SAMN18262920
OX-BSI-126_3	2d643cef-a5db-4f38-bf56-b50abcda6c91	2d643cef-a5db-4f38-bf56-b50abcda6c91_3	Plasmid	BSI	96201	52.87	ecoli	73	NA	NA	7	58	aph(3'')-Ib,aph(6)-Id,blaTEM-1,sul2	ISEc43,ISEc45,Tn3	IncB/O/K/Z_2	NA	MOBP	MPF_I	MOBP	conjugative	PTU-B/O/K/Z	III	0.9091	NA	NA	NA	2015-09-27	healthcare associated 0-30d	K84006	F	85	PRJNA604975	SAMN18262920
OX-BSI-127_2	2dc90f08-4702-4f0a-af9d-a6329be41242	2dc90f08-4702-4f0a-af9d-a6329be41242_2	Plasmid	BSI	128519	49.17	ecoli	2165	NA	NA	NA	NA	NA	IS1F,IS3,IS679,ISEc22,ISEhe3	IncFIA_1,IncFIB(AP001918)_1,IncFII_1	smdA-BAC0353	MOBF	MPF_F	MOBF	conjugative	PTU-E77	I	1	NA	NA	NA	NA	NA	NA	NA	NA	PRJNA604975	NA
OX-BSI-127_3	2dc90f08-4702-4f0a-af9d-a6329be41242	2dc90f08-4702-4f0a-af9d-a6329be41242_3	Plasmid	BSI	3258	47.11	ecoli	2165	NA	NA	52	11	NA	NA	ColRNAI_1	NA	-	-	MOB_unknown,MOBF,MOBP	mobilizable	PTU-E58	III	0.9375	NA	NA	NA	NA	NA	NA	NA	NA	PRJNA604975	NA
OX-BSI-127_1	2dc90f08-4702-4f0a-af9d-a6329be41242	2dc90f08-4702-4f0a-af9d-a6329be41242_chromo	Chromosome	BSI	4735434	50.88	ecoli	2165	NA	NA	NA	NA	NA	IS1H,ISEc26	NA	acn-BAC0003,acrA-BAC0005,acrB-BAC0006,acrD/yffA-BAC0008,acrE/envC-BAC0009,acrF/envD-BAC0010,actP/yjcG-BAC0564,arsB-BAC0576,arsC-BAC0583,arsC-BAC0584,arsP-BAC0036,arsR-BAC0594,asr-BAC0038,baeS-BAC0040,bfrA-BAC0048,bhsA/ycfR/comC-BAC0049,comR/ycfQ-BAC0076,copA-BAC0725,corA-BAC0086,corB-BAC0643,corD-BAC0644,cpxA-BAC0532,cueO-BAC0103,cueR/ybbI-BAC0105,cusA/ybdE-BAC0107,cusB-BAC0108,cusC/ylcB-BAC0109,…	NA	NA	NA	NA	NA	NA	NA	NA	NA	NA	NA	NA	NA	NA	NA	PRJNA604975	NA
OX-BSI-128_3	2e7ae473-5c0e-41de-869f-27c85593e736	2e7ae473-5c0e-41de-869f-27c85593e736_3	Plasmid	BSI	2333	55.64	ecoli	131	NA	NA	NA	NA	NA	NA	NA	NA	-	-	MOBP	mobilizable	-	-	1	NA	NA	NA	2009-07-14	community	K84074	M	82	PRJNA604975	SAMN18262916
OX-BSI-128_1	2e7ae473-5c0e-41de-869f-27c85593e736	2e7ae473-5c0e-41de-869f-27c85593e736_chromo	Chromosome	BSI	5232855	50.68	ecoli	131	NA	NA	NA	NA	NA	IS100kyp,IS1F,IS2,IS30,IS4,IS609,IS682,ISEc1,ISEc20,ISEc23,ISEc24,ISEc38,ISEc53,ISEc8,ISSd1	NA	acn-BAC0003,acrA-BAC0005,acrD/yffA-BAC0008,acrE/envC-BAC0009,acrF/envD-BAC0010,actP/yjcG-BAC0564,arsC-BAC0582,arsC-BAC0583,asr-BAC0038,baeS-BAC0040,bfrA-BAC0048,bhsA/ycfR/comC-BAC0049,comR/ycfQ-BAC0076,copA-BAC0725,corA-BAC0086,corB-BAC0643,corD-BAC0644,cpxA-BAC0532,cueO-BAC0103,cueR/ybbI-BAC0105,cusA/ybdE-BAC0107,cusB-BAC0108,cusC/ylcB-BAC0109,cusF/cusX-BAC0110,cusR/ylcA-BAC0111,cusS-BAC0112,cut…	NA	NA	NA	NA	NA	NA	NA	NA	NA	NA	2009-07-14	community	K84074	M	82	PRJNA604975	SAMN18262916
OX-BSI-128_2	2e7ae473-5c0e-41de-869f-27c85593e736	2e7ae473-5c0e-41de-869f-27c85593e736_2	Plasmid	BSI	181905	51.96	ecoli	131	NA	NA	140	4	aac(3)-IIe,aac(6')-Ib-cr5,aadA2,blaCTX-M-15,blaOXA-1,blaTEM-1,catB3,dfrA12,mph(A),qacEdelta1,sul1,tet(A)	IS1B,IS2,IS5,IS6100,ISEc9,ISKpn11,ISSm1,Tn5403	IncFIA_1,IncFIB(AP001918)_1,IncFIC(FII)_1	blt-BAC0050,iclR-BAC0196,merD-BAC0666,merE-BAC0670,qacEdelta1-BAC0323,wtpC-BAC0604	MOBF,MOBP	MPF_F	-	conjugative	PTU-FE	III	0.9941	NA	NA	NA	2009-07-14	community	K84074	M	82	PRJNA604975	SAMN18262916
OX-BSI-128_4	2e7ae473-5c0e-41de-869f-27c85593e736	2e7ae473-5c0e-41de-869f-27c85593e736_4	Plasmid	BSI	2101	47.17	ecoli	131	NA	NA	22	29	NA	NA	Col(BS512)_1	NA	-	-	-	non-mobilizable	PTU-E47	III	1	NA	NA	NA	2009-07-14	community	K84074	M	82	PRJNA604975	SAMN18262916
OX-BSI-129_2	2ec118f1-e354-42bc-98d4-96882f18cb35	2ec118f1-e354-42bc-98d4-96882f18cb35_2	Plasmid	BSI	118227	50.79	ecoli	127	NA	NA	1	123	NA	IS100kyp,IS21,IS26,ISEc10,ISEc53,ISVsa5	Col156_1,IncFIB(AP001918)_1,IncFII(29)_1_pUTI89	NA	MOBF,MOBP	MPF_F	MOBF	conjugative	PTU-FE	III	1	NA	NA	NA	2009-09-20	community	K84005	F	94	PRJNA604975	NA
OX-BSI-129_1	2ec118f1-e354-42bc-98d4-96882f18cb35	2ec118f1-e354-42bc-98d4-96882f18cb35_chromo	Chromosome	BSI	5192166	50.31	ecoli	127	NA	NA	NA	NA	tet(B)	IS200C,IS3,IS621,ISEc13,ISEc16,ISEc20,ISEc38,ISEc40,ISEc42,ISEc8,ISSd1	NA	acn-BAC0003,acrA-BAC0005,acrD/yffA-BAC0008,acrE/envC-BAC0009,acrF/envD-BAC0010,actP/yjcG-BAC0564,arsC-BAC0582,arsC-BAC0583,asr-BAC0038,baeS-BAC0040,bfrA-BAC0048,bhsA/ycfR/comC-BAC0049,blt-BAC0050,comR/ycfQ-BAC0076,copA-BAC0725,copS-BAC0752,corA-BAC0086,corB-BAC0643,corD-BAC0644,cpxA-BAC0532,cueO-BAC0103,cueR/ybbI-BAC0105,cusA/ybdE-BAC0107,cusB-BAC0108,cusC/ylcB-BAC0109,cusF/cusX-BAC0110,cusR/ylcA…	NA	NA	NA	NA	NA	NA	NA	NA	NA	NA	2009-09-20	community	K84005	F	94	PRJNA604975	NA
OX-BSI-130_1	2eecae02-a749-4a34-83d4-33e9c2e74f3e	2eecae02-a749-4a34-83d4-33e9c2e74f3e_chromo	Chromosome	BSI	5002675	50.73	ecoli	10	NA	NA	NA	NA	NA	IS100kyp,IS150,IS2,IS200C,ISEc21,ISEc23,ISEc26,ISEc30,ISEc38,ISEc5,ISEc52,ISSd1	NA	acn-BAC0003,acrA-BAC0005,acrB-BAC0006,acrD/yffA-BAC0008,acrE/envC-BAC0009,acrF/envD-BAC0010,actP/yjcG-BAC0564,arsB-BAC0576,arsC-BAC0583,arsC-BAC0584,arsR-BAC0594,asr-BAC0038,baeS-BAC0040,bfrA-BAC0048,bhsA/ycfR/comC-BAC0049,comR/ycfQ-BAC0076,copA-BAC0725,copS-BAC0752,corA-BAC0086,corB-BAC0643,corD-BAC0644,cpxA-BAC0532,cueO-BAC0103,cueR/ybbI-BAC0105,cusA/ybdE-BAC0107,cusB-BAC0108,cusC/ylcB-BAC0109,…	NA	NA	NA	NA	NA	NA	NA	NA	NA	NA	2017-06-01	healthcare associated 31-365d	K84024	M	65	PRJNA604975	SAMN18262911
OX-BSI-130_2	2eecae02-a749-4a34-83d4-33e9c2e74f3e	2eecae02-a749-4a34-83d4-33e9c2e74f3e_2	Plasmid	BSI	108193	44.8	ecoli	10	NA	NA	NA	NA	NA	IS1A,IS630,ISEc22,ISEc43,ISEc8	IncFIC(FII)_1	pmrG-BAC0486	MOBP,MOBP	-	MOBP	mobilizable	-	-	1	NA	NA	NA	2017-06-01	healthcare associated 31-365d	K84024	M	65	PRJNA604975	SAMN18262911
OX-BSI-130_3	2eecae02-a749-4a34-83d4-33e9c2e74f3e	2eecae02-a749-4a34-83d4-33e9c2e74f3e_3	Plasmid	BSI	77794	52.89	ecoli	10	NA	NA	NA	NA	aph(3'')-Ib,aph(6)-Id,blaCTX-M-15,blaTEM-1,dfrA14,qnrS1,sul2,tet(A)	IS5075,ISEc9,ISKpn19	IncFIB(K)_1_Kpn3	blt-BAC0050,triA-BAC0396,triC-BAC0398	MOBC	MPF_T	-	conjugative	PTU-E50	IV	1	NA	NA	NA	2017-06-01	healthcare associated 31-365d	K84024	M	65	PRJNA604975	SAMN18262911
OX-BSI-131_1	2fa2a434-7c7d-4c9f-ac7d-4cf2b64ba7aa	2fa2a434-7c7d-4c9f-ac7d-4cf2b64ba7aa_chromo	Chromosome	BSI	5092417	50.5	ecoli	73	NA	NA	NA	NA	aadA1,blaEC-5,blaOXA-1,catA1,qacEdelta1,sul1	IS100kyp,IS1203,IS1326,IS1F,IS200C,IS21,IS30,IS4,IS630,ISCro1,ISEc13,ISEc16,ISEc20,ISEc39,ISEc41,ISEc42,ISEc45,ISEc49	NA	acn-BAC0003,acrA-BAC0005,acrD/yffA-BAC0008,acrE/envC-BAC0009,acrF/envD-BAC0010,actP/yjcG-BAC0564,arsC-BAC0582,arsC-BAC0583,asr-BAC0038,baeS-BAC0040,bfrA-BAC0048,bhsA/ycfR/comC-BAC0049,comR/ycfQ-BAC0076,copA-BAC0725,corA-BAC0086,corB-BAC0643,corD-BAC0644,cpxA-BAC0532,cueO-BAC0103,cueR/ybbI-BAC0105,cusA/ybdE-BAC0107,cusB-BAC0108,cusC/ylcB-BAC0109,cusF/cusX-BAC0110,cusR/ylcA-BAC0111,cusS-BAC0112,cut…	NA	NA	NA	NA	NA	NA	NA	NA	NA	NA	2018-08-25	community	K84030	F	94	PRJNA604975	SAMN18262904
OX-BSI-132_2	314f8754-fb98-428e-bcfc-02b57d9f8d19	314f8754-fb98-428e-bcfc-02b57d9f8d19_2	Plasmid	BSI	149961	48.6	kpneumoniae	-	NA	NA	NA	NA	NA	IS1A,ISSen4	IncFIB(K)_1_Kpn3	NA	MOBF,MOBF	MPF_F	-	conjugative	-	-	1	NA	NA	NA	2018-02-18	healthcare associated 0-30d	K82012	M	55	PRJNA604975	NA
OX-BSI-132_1	314f8754-fb98-428e-bcfc-02b57d9f8d19	314f8754-fb98-428e-bcfc-02b57d9f8d19_chromo	Chromosome	BSI	5081366	58.18	kpneumoniae	-	NA	NA	NA	NA	blaOKP-B-34,fosA,oqxA,oqxB	NA	IncQ2_1	acn-BAC0003,acrA-BAC0005,acrB-BAC0006,acrC-BAC0007,acrD-BAC0563,acrE/envC-BAC0009,acrF/envD-BAC0010,actP/yjcG-BAC0564,adeE-BAC0013,arsB-BAC0578,arsC-BAC0583,arsC-BAC0584,arsR-BAC0589,baeR-BAC0596,baeS-BAC0040,bepG-BAC0046,bfrA-BAC0048,bhsA/ycfR/comC-BAC0049,chrA-BAC0026,chrB-BAC0027,comR/ycfQ-BAC0076,copA-BAC0725,copR-BAC0719,corA-BAC0086,corB-BAC0643,corD-BAC0644,cpxA-BAC0532,cueR/ybbI-BAC0105,c…	NA	NA	NA	NA	NA	NA	NA	NA	NA	NA	2018-02-18	healthcare associated 0-30d	K82012	M	55	PRJNA604975	NA
OX-BSI-133_1	31b958a4-03b3-4a7f-ba81-77be0dda40c5	31b958a4-03b3-4a7f-ba81-77be0dda40c5_chromo	Chromosome	BSI	5106253	50.49	ecoli	537	NA	NA	NA	NA	blaEC-5	IS100kyp,IS1397,IS621,IS630,ISEc13,ISEc16,ISEc20,ISEc39,ISEc42	NA	acn-BAC0003,acrA-BAC0005,acrD/yffA-BAC0008,acrE/envC-BAC0009,acrF/envD-BAC0010,actP/yjcG-BAC0564,arsC-BAC0582,arsC-BAC0583,asr-BAC0038,baeS-BAC0040,bfrA-BAC0048,bhsA/ycfR/comC-BAC0049,comR/ycfQ-BAC0076,copA-BAC0725,copS-BAC0752,corA-BAC0086,corB-BAC0643,corC-BAC0088,corD-BAC0644,cpxA-BAC0532,cueO-BAC0103,cueR/ybbI-BAC0105,cusA/ybdE-BAC0107,cusB-BAC0108,cusC/ylcB-BAC0109,cusF/cusX-BAC0110,cusR/ylc…	NA	NA	NA	NA	NA	NA	NA	NA	NA	NA	2009-02-09	healthcare associated 0-30d	K84072	M	54	PRJNA604975	SAMN18262883
OX-BSI-133_2	31b958a4-03b3-4a7f-ba81-77be0dda40c5	31b958a4-03b3-4a7f-ba81-77be0dda40c5_2	Plasmid	BSI	3112	45.21	ecoli	537	NA	NA	118	5	NA	NA	Col440I_1	NA	MOBF	-	MOB_unknown	mobilizable	PTU-E1	III	0.9861	NA	NA	NA	2009-02-09	healthcare associated 0-30d	K84072	M	54	PRJNA604975	SAMN18262883
OX-BSI-134_2	32088d5d-8579-43e3-b01a-81a4c283ea38	32088d5d-8579-43e3-b01a-81a4c283ea38_2	Plasmid	BSI	165726	49.63	ecoli	778	NA	NA	NA	NA	NA	IS186B,IS1R,IS1S,IS5075,IS629,IS903B,ISCro1,ISKpn24,ISSen4	p0111_1	merA-BAC0652,merC-BAC0664,merD-BAC0666,merE-BAC0672,merP-BAC0678,merR-BAC0689,merT-BAC0233	MOBH	-	-	mobilizable	-	-	1	NA	NA	NA	NA	NA	NA	NA	NA	PRJNA604975	NA
OX-BSI-134_3	32088d5d-8579-43e3-b01a-81a4c283ea38	32088d5d-8579-43e3-b01a-81a4c283ea38_3	Plasmid	BSI	4082	49.41	ecoli	778	NA	NA	21	29	NA	NA	Col8282_1	NA	MOBQ	-	MOBQ,MOBQ	mobilizable	PTU-E10	III	1	NA	NA	NA	NA	NA	NA	NA	NA	PRJNA604975	NA
OX-BSI-134_1	32088d5d-8579-43e3-b01a-81a4c283ea38	32088d5d-8579-43e3-b01a-81a4c283ea38_chromo	Chromosome	BSI	5150250	50.57	ecoli	778	NA	NA	NA	NA	NA	IS100kyp,IS1H,IS1X2,IS3,IS5,ISEc18,ISEc22,ISEc30,ISEc38,ISEc45,ISEc46,ISEc8	NA	acn-BAC0003,acrA-BAC0005,acrD/yffA-BAC0008,acrE/envC-BAC0009,acrF/envD-BAC0010,actP/yjcG-BAC0564,arsB-BAC0576,arsC-BAC0582,arsC-BAC0583,arsP-BAC0036,arsR-BAC0594,asr-BAC0038,baeS-BAC0040,bfrA-BAC0048,bhsA/ycfR/comC-BAC0049,comR/ycfQ-BAC0076,copA-BAC0725,copS-BAC0752,corA-BAC0086,corB-BAC0643,corC-BAC0088,corD-BAC0644,cpxA-BAC0532,cueO-BAC0103,cueR/ybbI-BAC0105,cusA/ybdE-BAC0107,cusB-BAC0108,cusC/…	NA	NA	NA	NA	NA	NA	NA	NA	NA	NA	NA	NA	NA	NA	NA	PRJNA604975	NA
OX-BSI-135_1	321e0aa2-d2fd-49e9-b2b9-c36198e1f77d_contig	321e0aa2-d2fd-49e9-b2b9-c36198e1f77d_contig_chromo	Chromosome	BSI	5248138	57.55	kpneumoniae	-	NA	NA	NA	NA	blaSHV-11,fosA,oqxA,oqxB5	IS1400	NA	acn-BAC0003,acrA-BAC0005,acrB-BAC0006,acrD-BAC0563,acrE/envC-BAC0009,acrF/envD-BAC0010,actP/yjcG-BAC0564,adeE-BAC0013,arsB-BAC0578,arsC-BAC0582,arsC-BAC0583,arsR-BAC0589,baeR-BAC0596,baeS-BAC0040,bfrA-BAC0048,bhsA/ycfR/comC-BAC0049,cepA-BAC0061,comR/ycfQ-BAC0076,copA-BAC0725,corA-BAC0641,corB-BAC0643,corD-BAC0644,cpxA-BAC0532,cueO-BAC0103,cueR/ybbI-BAC0105,cusA/ybdE-BAC0107,cusB-BAC0108,cusC/ylcB…	NA	NA	NA	NA	NA	NA	NA	NA	NA	NA	NA	NA	NA	NA	NA	PRJNA604975	NA
OX-BSI-136_2	32534dbe-3f9a-4247-993d-ef3211f58dbe	32534dbe-3f9a-4247-993d-ef3211f58dbe_2	Plasmid	BSI	114235	51.03	ecoli	95	NA	NA	1	123	NA	IS100kyp,IS21,IS26,ISEc10,ISEc53	Col156_1,IncFIB(AP001918)_1,IncFII(29)_1_pUTI89	NA	MOBF,MOBP	MPF_F	MOBF	conjugative	PTU-FE	III	1	NA	NA	NA	2018-10-28	healthcare associated 31-365d	K84054	M	60	PRJNA604975	SAMN18262878
OX-BSI-136_3	32534dbe-3f9a-4247-993d-ef3211f58dbe	32534dbe-3f9a-4247-993d-ef3211f58dbe_3	Plasmid	BSI	88732	53.03	ecoli	95	NA	NA	7	58	aph(3'')-Ib,blaTEM-1,sul2	NA	IncB/O/K/Z_2	NA	MOBP	MPF_I	MOBP	conjugative	PTU-B/O/K/Z	III	0.9545	NA	NA	NA	2018-10-28	healthcare associated 31-365d	K84054	M	60	PRJNA604975	SAMN18262878
OX-BSI-136_1	32534dbe-3f9a-4247-993d-ef3211f58dbe	32534dbe-3f9a-4247-993d-ef3211f58dbe_chromo	Chromosome	BSI	4997968	50.57	ecoli	95	NA	NA	NA	NA	NA	IS100kyp,IS1203,IS1397,IS200C,IS621,ISEc20,ISEc30,ISEc38,ISEc40,ISEc45,ISEc48,ISEc8	NA	acn-BAC0003,acrA-BAC0005,acrD/yffA-BAC0008,acrE/envC-BAC0009,acrF/envD-BAC0010,actP/yjcG-BAC0564,arsC-BAC0582,arsC-BAC0583,asr-BAC0038,baeS-BAC0040,bfrA-BAC0048,bhsA/ycfR/comC-BAC0049,comR/ycfQ-BAC0076,copA-BAC0725,corA-BAC0086,corB-BAC0643,corD-BAC0644,cpxA-BAC0532,cueO-BAC0103,cueR/ybbI-BAC0105,cusA/ybdE-BAC0107,cusB-BAC0108,cusC/ylcB-BAC0109,cusF/cusX-BAC0110,cusR/ylcA-BAC0111,cusS-BAC0112,cut…	NA	NA	NA	NA	NA	NA	NA	NA	NA	NA	2018-10-28	healthcare associated 31-365d	K84054	M	60	PRJNA604975	SAMN18262878
OX-BSI-137_1	327854de-7865-4d75-978a-612839c045a3	327854de-7865-4d75-978a-612839c045a3_chromo	Chromosome	BSI	5191400	57.62	kpneumoniae	2891	NA	NA	NA	NA	blaSHV-1,fosA,oqxA,oqxB	ISErsp1	NA	acn-BAC0003,acrA-BAC0005,acrB-BAC0006,acrC-BAC0007,acrD-BAC0563,acrE/envC-BAC0009,acrF/envD-BAC0010,actP/yjcG-BAC0564,adeE-BAC0013,arsB-BAC0578,arsC-BAC0582,arsC-BAC0583,arsR-BAC0589,baeR-BAC0596,baeS-BAC0040,bepG-BAC0046,bfrA-BAC0048,bhsA/ycfR/comC-BAC0049,cepA-BAC0061,comR/ycfQ-BAC0076,copA-BAC0725,corA-BAC0086,corB-BAC0643,corD-BAC0644,cpxA-BAC0532,cueR/ybbI-BAC0105,cusA/ybdE-BAC0107,cusB-BAC0…	NA	NA	NA	NA	NA	NA	NA	NA	NA	NA	2018-03-11	nosocomial	K84062	M	95	PRJNA604975	NA
OX-BSI-137_2	327854de-7865-4d75-978a-612839c045a3	327854de-7865-4d75-978a-612839c045a3_2	Plasmid	BSI	235195	53.31	kpneumoniae	2891	NA	NA	16	37	blaSHV-1	IS1F,IS1R,IS1X3,IS903,ISEc8,ISEcl1,ISKox1,ISKpn26	IncFIB(K)_1_Kpn3	arsA-BAC0571,arsC-BAC0582,arsC-BAC0584,arsR-BAC0589,arsR-BAC0591,copG-BAC0717,fecE-BAC0164,nikB-BAC0271,nikC-BAC0272,nikD-BAC0273,oxyRkp-BAC0536,pcoA-BAC0303,pcoB-BAC0304,pcoC-BAC0305,pcoD-BAC0306,pcoE-BAC0307,pcoR-BAC0308,pcoS-BAC0309,silA-BAC0341,silB-BAC0342,silC-BAC0343,silE-BAC0344,silF-BAC0345,silP-BAC0346,silR-BAC0347,silS-BAC0348,sugE-BAC0378,wtpC-BAC0604,yfeB-BAC0440	MOBF,MOBF	MPF_F	-	conjugative	PTU-FK	III	0.9766	NA	NA	NA	2018-03-11	nosocomial	K84062	M	95	PRJNA604975	NA
OX-BSI-137_3	327854de-7865-4d75-978a-612839c045a3	327854de-7865-4d75-978a-612839c045a3_3	Plasmid	BSI	110967	49.07	kpneumoniae	2891	NA	NA	145	4	NA	NA	NA	NA	-	-	-	non-mobilizable	PTU-E15	II	1	NA	NA	NA	2018-03-11	nosocomial	K84062	M	95	PRJNA604975	NA
OX-BSI-138_2	32d30fb4-1938-455d-8a46-1727cdd43954	32d30fb4-1938-455d-8a46-1727cdd43954_2	Plasmid	BSI	147808	52.59	ecoli	69	205	2	1	123	aadA5,aph(3'')-Ib,aph(6)-Id,blaTEM,dfrA17,mph(A),qacEdelta1,sul1,sul2	IS100kyp,IS21,IS5,ISEc53	Col156_1,IncFIB(AP001918)_1,IncFII(29)_1_pUTI89	merA-BAC0652,merC-BAC0664,merD-BAC0666,merE-BAC0670,merP-BAC0678,merR-BAC0232,merT-BAC0693,qacEdelta1-BAC0323	MOBF,MOBP	MPF_F	MOBF	conjugative	PTU-FE	III	0.9941	NA	NA	NA	NA	NA	NA	NA	NA	PRJNA604975	NA
OX-BSI-138_3	32d30fb4-1938-455d-8a46-1727cdd43954	32d30fb4-1938-455d-8a46-1727cdd43954_3	Plasmid	BSI	84070	53.21	ecoli	69	206	2	7	58	aph(3'')-Ib,aph(6)-Id,dfrA14,sul2	NA	IncB/O/K/Z_2	NA	MOBP	MPF_I	MOBP	conjugative	PTU-B/O/K/Z	III	0.9545	NA	NA	NA	NA	NA	NA	NA	NA	PRJNA604975	NA
OX-BSI-138_4	32d30fb4-1938-455d-8a46-1727cdd43954	32d30fb4-1938-455d-8a46-1727cdd43954_4	Plasmid	BSI	33824	42.04	ecoli	69	207	2	97	6	NA	NA	IncX1_1	triA-BAC0396,triC-BAC0398	MOBP	MPF_T	-	conjugative	PTU-E80	IV	0.8333	NA	NA	NA	NA	NA	NA	NA	NA	PRJNA604975	NA
OX-BSI-138_1	32d30fb4-1938-455d-8a46-1727cdd43954	32d30fb4-1938-455d-8a46-1727cdd43954_chromo	Chromosome	BSI	5300222	50.76	ecoli	69	NA	NA	NA	NA	NA	IS1203,IS1351,IS1F,IS2,IS30,IS911,ISEc22,ISEc43,ISEc45,ISEc46,ISEc8	NA	acn-BAC0003,acrA-BAC0005,acrB-BAC0006,acrD/yffA-BAC0008,acrE/envC-BAC0009,acrF/envD-BAC0010,actP/yjcG-BAC0564,arsA-BAC0571,arsB-BAC0576,arsC-BAC0582,arsC-BAC0583,arsD-BAC0587,arsP-BAC0036,arsR-BAC0594,asr-BAC0038,baeS-BAC0040,bfrA-BAC0048,bhsA/ycfR/comC-BAC0049,comR/ycfQ-BAC0076,copA-BAC0725,copS-BAC0752,corA-BAC0086,corB-BAC0643,corD-BAC0644,cpxA-BAC0532,cueO-BAC0103,cueR/ybbI-BAC0105,cusA/ybdE-…	NA	NA	NA	NA	NA	NA	NA	NA	NA	NA	NA	NA	NA	NA	NA	PRJNA604975	NA
OX-BSI-139_1	330d01c8-33cc-4f1f-8c64-ec49bfa9113b	330d01c8-33cc-4f1f-8c64-ec49bfa9113b_chromo	Chromosome	BSI	4847807	50.75	ecoli	541	NA	NA	NA	NA	NA	IS100kyp,IS1414,IS150,IS1B,IS26,IS3,IS5708,ISEc38,ISKpn26	NA	acn-BAC0003,acrA-BAC0005,acrB-BAC0006,acrD/yffA-BAC0008,acrE/envC-BAC0009,acrF/envD-BAC0010,acrR/ybaH-BAC0011,arsB-BAC0576,arsC-BAC0583,arsC-BAC0584,arsR-BAC0594,asr-BAC0038,baeS-BAC0040,bfrA-BAC0048,bhsA/ycfR/comC-BAC0049,chrA-BAC0026,chrB-BAC0027,comR/ycfQ-BAC0076,copA-BAC0725,copG-BAC0717,copS-BAC0752,corB-BAC0643,corD-BAC0644,cpxA-BAC0532,cueO-BAC0103,cueR/ybbI-BAC0105,cusA/ybdE-BAC0107,cusB-…	NA	NA	NA	NA	NA	NA	NA	NA	NA	NA	2009-07-21	nosocomial	K82065	M	66	PRJNA604975	NA
OX-BSI-140_3	33313b4b-6e17-4856-8cb9-5a2251186854	33313b4b-6e17-4856-8cb9-5a2251186854_3	Plasmid	BSI	4183	37.2	ecoli	-	NA	NA	74	9	NA	NA	NA	NA	MOBQ	-	-	mobilizable	-	-	1	NA	NA	NA	NA	NA	NA	NA	NA	PRJNA604975	NA
OX-BSI-140_4	33313b4b-6e17-4856-8cb9-5a2251186854	33313b4b-6e17-4856-8cb9-5a2251186854_4	Plasmid	BSI	2338	47.86	ecoli	-	NA	NA	NA	NA	NA	NA	ColRNAI_1	NA	-	-	-	non-mobilizable	-	-	1	NA	NA	NA	NA	NA	NA	NA	NA	PRJNA604975	NA
OX-BSI-140_1	33313b4b-6e17-4856-8cb9-5a2251186854	33313b4b-6e17-4856-8cb9-5a2251186854_chromo	Chromosome	BSI	5067997	50.68	ecoli	-	NA	NA	NA	NA	NA	IS1H,IS1X2,IS26,IS5708,IS609,IS903,ISEc21,ISEc38,ISEhe2,ISKpn8,ISPa16,ISPpu21,ISPpu23,ISSba14,ISSfl7	pENTAS02_1	acn-BAC0003,acrA-BAC0005,acrB-BAC0006,acrD/yffA-BAC0008,acrE/envC-BAC0009,acrF/envD-BAC0010,arsB-BAC0576,arsC-BAC0583,arsC-BAC0584,arsR-BAC0594,asr-BAC0038,baeS-BAC0040,bfrA-BAC0048,bhsA/ycfR/comC-BAC0049,cepA-BAC0061,comR/ycfQ-BAC0076,copA-BAC0725,copG-BAC0717,corA-BAC0086,corB-BAC0643,corD-BAC0644,cpxA-BAC0532,cueO-BAC0103,cueR/ybbI-BAC0105,cusA/ybdE-BAC0107,cusB-BAC0108,cusC/ylcB-BAC0109,cusF/…	NA	NA	NA	NA	NA	NA	NA	NA	NA	NA	NA	NA	NA	NA	NA	PRJNA604975	NA
OX-BSI-140_2	33313b4b-6e17-4856-8cb9-5a2251186854	33313b4b-6e17-4856-8cb9-5a2251186854_2	Plasmid	BSI	73884	50.32	ecoli	-	NA	NA	NA	NA	NA	IS1R,IS4321L,IS5,IS5708,ISKpn24,TnEc1	p0111_1	fecE-BAC0164	-	-	-	non-mobilizable	-	-	1	NA	NA	NA	NA	NA	NA	NA	NA	PRJNA604975	NA
OX-BSI-141_1	333acdb0-ca54-432d-aa39-6518e8214608	333acdb0-ca54-432d-aa39-6518e8214608_chromo	Chromosome	BSI	5203752	50.71	ecoli	404	NA	NA	NA	NA	aadA1,blaEC-5,dfrA1,sat2	IS100kyp,IS1203,IS1397,IS30,IS609,IS621,IS911,ISAba1,ISEc20,ISEc21,ISEc22,ISEc30,ISEc38,ISEc40,ISEc42,ISEc45,ISSd1	NA	acn-BAC0003,acrA-BAC0005,acrD/yffA-BAC0008,acrE/envC-BAC0009,acrF/envD-BAC0010,actP/yjcG-BAC0564,arsB-BAC0579,arsC-BAC0582,arsC-BAC0583,arsH-BAC0034,asr-BAC0038,baeS-BAC0040,bfrA-BAC0048,bhsA/ycfR/comC-BAC0049,comR/ycfQ-BAC0076,copA-BAC0725,corA-BAC0086,corB-BAC0643,corD-BAC0644,cpxA-BAC0532,cueO-BAC0103,cueR/ybbI-BAC0105,cusA/ybdE-BAC0107,cusB-BAC0108,cusC/ylcB-BAC0109,cusF/cusX-BAC0110,cusR/ylc…	NA	NA	NA	NA	NA	NA	NA	NA	NA	NA	2018-10-17	healthcare associated 31-365d	K84072	M	64	PRJNA604975	SAMN18262871
OX-BSI-141_3	333acdb0-ca54-432d-aa39-6518e8214608	333acdb0-ca54-432d-aa39-6518e8214608_3	Plasmid	BSI	1565	50.86	ecoli	404	19	8	70	9	NA	NA	Col(MG828)_1	NA	-	-	-	non-mobilizable	PTU-E9	VI	1	NA	NA	NA	2018-10-17	healthcare associated 31-365d	K84072	M	64	PRJNA604975	SAMN18262871
OX-BSI-141_2	333acdb0-ca54-432d-aa39-6518e8214608	333acdb0-ca54-432d-aa39-6518e8214608_2	Plasmid	BSI	94975	50.48	ecoli	404	NA	NA	7	58	NA	NA	IncB/O/K/Z_1	NA	MOBP,MOBP,MOBP	MPF_I	MOBP	conjugative	PTU-B/O/K/Z	III	1	NA	NA	NA	2018-10-17	healthcare associated 31-365d	K84072	M	64	PRJNA604975	SAMN18262871
OX-BSI-142_2	340bb8ac-3d66-452e-ba16-581afcbca8e8	340bb8ac-3d66-452e-ba16-581afcbca8e8_2	Plasmid	BSI	224365	51.11	kpneumoniae	490	NA	NA	19	33	NA	IS1A,IS1X4,IS903,ISEc21,ISEc36,ISKox1,ISKpn2,ISKpn21,ISKpn24,ISSen3	IncFIB(K)_1_Kpn3	copG-BAC0717,fecE-BAC0164,pcoA-BAC0303,pcoB-BAC0304,pcoC-BAC0305,pcoD-BAC0306,pcoE-BAC0307,pcoR-BAC0308,pcoS-BAC0309,pstB-BAC0316,silA-BAC0341,silB-BAC0342,silC-BAC0343,silE-BAC0344,silF-BAC0345,silP-BAC0346,silR-BAC0347,silS-BAC0348	-	-	-	non-mobilizable	PTU-E35	I	1	NA	NA	NA	2012-11-12	healthcare associated 31-365d	K84037	M	74	PRJNA604975	SAMN14345066
OX-BSI-142_1	340bb8ac-3d66-452e-ba16-581afcbca8e8	340bb8ac-3d66-452e-ba16-581afcbca8e8_chromo	Chromosome	BSI	5417880	57.34	kpneumoniae	490	NA	NA	NA	NA	blaSHV-1,fosA,oqxA,oqxB	IS5075,ISEc21,Tn5403	NA	acn-BAC0003,acrA-BAC0005,acrB-BAC0006,acrC-BAC0007,acrE/envC-BAC0009,acrF/envD-BAC0010,actP/yjcG-BAC0564,adeE-BAC0013,arsB-BAC0578,arsC-BAC0582,arsC-BAC0583,arsR-BAC0589,baeR-BAC0596,baeS-BAC0040,bepG-BAC0046,bfrA-BAC0048,bhsA/ycfR/comC-BAC0049,cepA-BAC0061,comR/ycfQ-BAC0076,copA-BAC0725,corA-BAC0086,corB-BAC0643,corD-BAC0644,corR-BAC0089,cpxA-BAC0532,cueR/ybbI-BAC0105,cusA/ybdE-BAC0107,cusB-BAC0…	NA	NA	NA	NA	NA	NA	NA	NA	NA	NA	2012-11-12	healthcare associated 31-365d	K84037	M	74	PRJNA604975	SAMN14345066
OX-BSI-142_7	340bb8ac-3d66-452e-ba16-581afcbca8e8	340bb8ac-3d66-452e-ba16-581afcbca8e8_7	Plasmid	BSI	4938	51.42	kpneumoniae	490	NA	NA	189	3	NA	NA	Col440I_1,Col440II_1	NA	MOBP,MOBP	-	MOBP	mobilizable	PTU-E3	V	0.9565	NA	NA	NA	2012-11-12	healthcare associated 31-365d	K84037	M	74	PRJNA604975	SAMN14345066
OX-BSI-142_9	340bb8ac-3d66-452e-ba16-581afcbca8e8	340bb8ac-3d66-452e-ba16-581afcbca8e8_9	Plasmid	BSI	3325	47.46	kpneumoniae	490	NA	NA	128	5	NA	NA	Col440I_1	NA	-	-	-	non-mobilizable	-	-	1	NA	NA	NA	2012-11-12	healthcare associated 31-365d	K84037	M	74	PRJNA604975	SAMN14345066
OX-BSI-142_10	340bb8ac-3d66-452e-ba16-581afcbca8e8	340bb8ac-3d66-452e-ba16-581afcbca8e8_10	Plasmid	BSI	1697	44.49	kpneumoniae	490	NA	NA	26	23	NA	NA	NA	NA	-	-	-	non-mobilizable	-	-	1	NA	NA	NA	2012-11-12	healthcare associated 31-365d	K84037	M	74	PRJNA604975	SAMN14345066
OX-BSI-142_4	340bb8ac-3d66-452e-ba16-581afcbca8e8	340bb8ac-3d66-452e-ba16-581afcbca8e8_4	Plasmid	BSI	15407	45.55	kpneumoniae	490	NA	NA	20	32	NA	IS102,IS1X4,ISSen4	IncFIA(HI1)_1_HI1	NA	-	-	MOBF	mobilizable	-	-	1	NA	NA	NA	2012-11-12	healthcare associated 31-365d	K84037	M	74	PRJNA604975	SAMN14345066
OX-BSI-142_8	340bb8ac-3d66-452e-ba16-581afcbca8e8	340bb8ac-3d66-452e-ba16-581afcbca8e8_8	Plasmid	BSI	3335	46.33	kpneumoniae	490	NA	NA	88	7	NA	NA	ColRNAI_1	NA	-	-	-	non-mobilizable	PTU-?	II	0.5	NA	NA	NA	2012-11-12	healthcare associated 31-365d	K84037	M	74	PRJNA604975	SAMN14345066
OX-BSI-142_6	340bb8ac-3d66-452e-ba16-581afcbca8e8	340bb8ac-3d66-452e-ba16-581afcbca8e8_6	Plasmid	BSI	8492	46.86	kpneumoniae	490	NA	NA	142	4	NA	NA	ColRNAI_1	NA	-	-	-	non-mobilizable	-	-	1	NA	NA	NA	2012-11-12	healthcare associated 31-365d	K84037	M	74	PRJNA604975	SAMN14345066
OX-BSI-142_3	340bb8ac-3d66-452e-ba16-581afcbca8e8	340bb8ac-3d66-452e-ba16-581afcbca8e8_3	Plasmid	BSI	123492	52.37	kpneumoniae	490	12	4	13	41	aph(3'')-Ib,aph(6)-Id,blaCTX-M-15,blaTEM-1,dfrA14,qnrB1,sul2	IS102,IS5075,IS6100,ISEc9	IncFII_1_pKP91	NA	MOBF,MOBF	MPF_F	-	conjugative	PTU-FK	III	0.9922	NA	NA	NA	2012-11-12	healthcare associated 31-365d	K84037	M	74	PRJNA604975	SAMN14345066
OX-BSI-142_5	340bb8ac-3d66-452e-ba16-581afcbca8e8	340bb8ac-3d66-452e-ba16-581afcbca8e8_5	Plasmid	BSI	9553	51.74	kpneumoniae	490	5	32	18	34	NA	Tn5403	NA	NA	MOBP	-	-	mobilizable	-	-	1	NA	NA	NA	2012-11-12	healthcare associated 31-365d	K84037	M	74	PRJNA604975	SAMN14345066
OX-BSI-143_2	340ed47c-5b72-4e42-a038-214ece7c0d4c	340ed47c-5b72-4e42-a038-214ece7c0d4c_2	Plasmid	BSI	167427	52.25	ecoli	131	233	3	30	21	aadA5,dfrA17,mph(A),qacEdelta1,sul1,tet(A)	IS100kyp,IS150,IS6100,IS629,ISCro1,ISKpn26,ISSm1,Tn5403	Col156_1,IncFIA_1,IncFIB(AP001918)_1,IncFIC(FII)_1	blt-BAC0050,frnE-BAC0170,qacEdelta1-BAC0323	MOBF,MOBP	MPF_F	MOBF	conjugative	PTU-FE	III	1	NA	NA	NA	2018-01-17	healthcare associated 0-30d	K84059	M	72	PRJNA604975	SAMN18262862
OX-BSI-143_1	340ed47c-5b72-4e42-a038-214ece7c0d4c	340ed47c-5b72-4e42-a038-214ece7c0d4c_chromo	Chromosome	BSI	5249145	50.58	ecoli	131	NA	NA	NA	NA	aac(3)-IIe,aac(6')-Ib-cr5,blaCTX-M-15,blaOXA-1,catB3	IS100kyp,IS150,IS1F,IS2,IS200C,IS30,IS4,IS609,IS682,ISEc1,ISEc10,ISEc20,ISEc24,ISEc38,ISEc53,ISEc8,ISKpn11,ISSd1	NA	acn-BAC0003,acrA-BAC0005,acrD/yffA-BAC0008,acrE/envC-BAC0009,acrF/envD-BAC0010,actP/yjcG-BAC0564,arsC-BAC0582,arsC-BAC0583,asr-BAC0038,baeS-BAC0040,bfrA-BAC0048,bhsA/ycfR/comC-BAC0049,comR/ycfQ-BAC0076,copA-BAC0725,corA-BAC0086,corB-BAC0643,corD-BAC0644,cpxA-BAC0532,cueO-BAC0103,cueR/ybbI-BAC0105,cusA/ybdE-BAC0107,cusB-BAC0108,cusC/ylcB-BAC0109,cusF/cusX-BAC0110,cusR/ylcA-BAC0111,cusS-BAC0112,cut…	NA	NA	NA	NA	NA	NA	NA	NA	NA	NA	2018-01-17	healthcare associated 0-30d	K84059	M	72	PRJNA604975	SAMN18262862
OX-BSI-144_1	3412ce23-d85a-4b08-a97b-db3ef8a9e27a	3412ce23-d85a-4b08-a97b-db3ef8a9e27a_chromo	Chromosome	BSI	4741342	50.68	ecoli	104	NA	NA	NA	NA	blaEC-5	IS1400,IS630,ISEc38,ISEc39,ISEc40,ISEc41,ISEc42,ISEc47	NA	acn-BAC0003,acrA-BAC0005,acrB-BAC0006,acrD/yffA-BAC0008,acrE/envC-BAC0009,acrF/envD-BAC0010,actP/yjcG-BAC0564,arsC-BAC0582,arsC-BAC0583,asr-BAC0038,baeS-BAC0040,bfrA-BAC0048,bhsA/ycfR/comC-BAC0049,comR/ycfQ-BAC0076,copA-BAC0725,copS-BAC0752,corA-BAC0086,corB-BAC0643,corD-BAC0644,cpxA-BAC0532,cueO-BAC0103,cueR/ybbI-BAC0105,cusA/ybdE-BAC0107,cusB-BAC0108,cusC/ylcB-BAC0109,cusF/cusX-BAC0110,cusR/ylc…	NA	NA	NA	NA	NA	NA	NA	NA	NA	NA	2018-06-13	nosocomial	K84014	F	21	PRJNA604975	SAMN18262861
OX-BSI-145_2	3447545d-09b0-4096-9211-874c50c7d7fe	3447545d-09b0-4096-9211-874c50c7d7fe_2	Plasmid	BSI	153311	51.11	ecoli	88	NA	NA	2	100	aph(3'')-Ib,aph(3')-Ia,aph(6)-Id,blaTEM-1,dfrA5,sul2	IS2,IS629,ISEc22,ISEc32,ISEc53	IncFIB(AP001918)_1,IncFII_1	merA-BAC0652,merC-BAC0664,merD-BAC0666,merE-BAC0670,merP-BAC0678,merR-BAC0232,merT-BAC0693,sitA-BAC0349,sitB-BAC0350,sitC-BAC0351,sitD-BAC0352,smdB-BAC0354,tupC-BAC0607	MOBF	MPF_F	MOBF	conjugative	PTU-FE	III	1	NA	NA	NA	2011-03-12	nosocomial	K84059	M	54	PRJNA604975	NA
OX-BSI-145_1	3447545d-09b0-4096-9211-874c50c7d7fe	3447545d-09b0-4096-9211-874c50c7d7fe_chromo	Chromosome	BSI	4832395	50.79	ecoli	88	NA	NA	NA	NA	NA	IS100kyp,IS1F,IS1G,IS1H,IS1R,IS3411,ISEc12,ISEc17,ISEc38,ISEc52,ISEc53,ISEc8,ISEcl3,ISPrst3,ISSd1	NA	acn-BAC0003,acrA-BAC0005,acrB-BAC0006,acrD/yffA-BAC0008,acrE/envC-BAC0009,acrF/envD-BAC0010,actP/yjcG-BAC0564,arsB-BAC0578,arsC-BAC0583,arsC-BAC0584,arsR-BAC0594,asr-BAC0038,baeS-BAC0040,bfrA-BAC0048,bhsA/ycfR/comC-BAC0049,comR/ycfQ-BAC0076,copA-BAC0725,copS-BAC0752,corA-BAC0086,corB-BAC0643,corD-BAC0644,cpxA-BAC0532,cueO-BAC0103,cueR/ybbI-BAC0105,cusA/ybdE-BAC0107,cusB-BAC0108,cusC/ylcB-BAC0109,…	NA	NA	NA	NA	NA	NA	NA	NA	NA	NA	2011-03-12	nosocomial	K84059	M	54	PRJNA604975	NA
OX-BSI-146_3	35114152-2868-4ba9-8173-01a462cbf558	35114152-2868-4ba9-8173-01a462cbf558_3	Plasmid	BSI	87322	53.05	ecoli	144	NA	NA	7	58	blaTEM-1	Tn3	IncB/O/K/Z_2	NA	MOBP	MPF_I	MOBP	conjugative	PTU-B/O/K/Z	III	0.9545	NA	NA	NA	2009-10-24	healthcare associated 31-365d	K84082	F	97	PRJNA604975	SAMN18262852
OX-BSI-146_5	35114152-2868-4ba9-8173-01a462cbf558	35114152-2868-4ba9-8173-01a462cbf558_5	Plasmid	BSI	6676	44.22	ecoli	144	NA	NA	177	3	NA	NA	NA	NA	MOBQ	-	MOBQ,MOBQ	mobilizable	PTU-E10	III	1	NA	NA	NA	2009-10-24	healthcare associated 31-365d	K84082	F	97	PRJNA604975	SAMN18262852
OX-BSI-146_4	35114152-2868-4ba9-8173-01a462cbf558	35114152-2868-4ba9-8173-01a462cbf558_4	Plasmid	BSI	71439	50.8	ecoli	144	NA	NA	12	42	blaTEM-1	Tn3	IncFII_1	NA	MOBF	MPF_F	MOBF	conjugative	PTU-FE	III	0.994	NA	NA	NA	2009-10-24	healthcare associated 31-365d	K84082	F	97	PRJNA604975	SAMN18262852
OX-BSI-146_2	35114152-2868-4ba9-8173-01a462cbf558	35114152-2868-4ba9-8173-01a462cbf558_2	Plasmid	BSI	113209	51.03	ecoli	144	NA	NA	1	123	NA	IS26,ISEc53	Col156_1,IncFIB(AP001918)_1,IncFII(29)_1_pUTI89	NA	MOBF,MOBP	MPF_F	MOBF	conjugative	PTU-FE	III	1	NA	NA	NA	2009-10-24	healthcare associated 31-365d	K84082	F	97	PRJNA604975	SAMN18262852
OX-BSI-146_1	35114152-2868-4ba9-8173-01a462cbf558	35114152-2868-4ba9-8173-01a462cbf558_chromo	Chromosome	BSI	5290917	50.61	ecoli	144	NA	NA	NA	NA	NA	IS1203,IS1397,IS150,IS1F,IS200C,ISEc22,ISEc40,ISEc42,ISEc48,ISKpn26,ISSd1	NA	acn-BAC0003,acrA-BAC0005,acrD/yffA-BAC0008,acrE/envC-BAC0009,acrF/envD-BAC0010,actP/yjcG-BAC0564,arsC-BAC0582,arsC-BAC0583,asr-BAC0038,baeS-BAC0040,bfrA-BAC0048,bhsA/ycfR/comC-BAC0049,comR/ycfQ-BAC0076,copA-BAC0725,corA-BAC0086,corB-BAC0643,corC-BAC0088,corD-BAC0644,cpxA-BAC0532,cueO-BAC0103,cueR/ybbI-BAC0105,cusA/ybdE-BAC0107,cusB-BAC0108,cusC/ylcB-BAC0109,cusF/cusX-BAC0110,cusR/ylcA-BAC0111,cus…	NA	NA	NA	NA	NA	NA	NA	NA	NA	NA	2009-10-24	healthcare associated 31-365d	K84082	F	97	PRJNA604975	SAMN18262852
OX-BSI-146_6	35114152-2868-4ba9-8173-01a462cbf558	35114152-2868-4ba9-8173-01a462cbf558_6	Plasmid	BSI	5631	47.38	ecoli	144	NA	NA	11	43	NA	NA	ColRNAI_1	NA	MOBP	-	MOBP	mobilizable	PTU-E22	I	1	NA	NA	NA	2009-10-24	healthcare associated 31-365d	K84082	F	97	PRJNA604975	SAMN18262852
OX-BSI-147_2	361b05d4-dcde-44f6-af85-24bb2c695313	361b05d4-dcde-44f6-af85-24bb2c695313_2	Plasmid	BSI	129608	51.55	ecoli	69	NA	NA	1	123	aadA5,blaTEM-1,dfrA17,qacEdelta1,sul1	IS100kyp,IS1R,IS21,ISEc53	Col156_1,IncFIB(AP001918)_1,IncFII(29)_1_pUTI89	qacEdelta1-BAC0323	MOBF,MOBP	MPF_F	MOBF	conjugative	PTU-FE	III	1	NA	NA	NA	2017-06-22	healthcare associated 31-365d	K84012	F	90	PRJNA604975	SAMN18262843
OX-BSI-147_6	361b05d4-dcde-44f6-af85-24bb2c695313	361b05d4-dcde-44f6-af85-24bb2c695313_6	Plasmid	BSI	2617	50.36	ecoli	69	NA	NA	65	10	qnrB19	NA	Col440I_1	NA	-	-	MOBP	mobilizable	PTU-E76	III	0.55	NA	NA	NA	2017-06-22	healthcare associated 31-365d	K84012	F	90	PRJNA604975	SAMN18262843
OX-BSI-147_4	361b05d4-dcde-44f6-af85-24bb2c695313	361b05d4-dcde-44f6-af85-24bb2c695313_4	Plasmid	BSI	5167	46.89	ecoli	69	NA	NA	4	69	NA	NA	Col156_1	NA	MOBQ	-	-	mobilizable	PTU-E7	III	1	NA	NA	NA	2017-06-22	healthcare associated 31-365d	K84012	F	90	PRJNA604975	SAMN18262843
OX-BSI-147_1	361b05d4-dcde-44f6-af85-24bb2c695313	361b05d4-dcde-44f6-af85-24bb2c695313_chromo	Chromosome	BSI	5124597	50.72	ecoli	69	NA	NA	NA	NA	NA	IS1203,IS1351,IS1F,IS2,IS30,IS911,ISEc22,ISEc38,ISEc43,ISEc45,ISEc46,ISEc8,ISKpn26	NA	acn-BAC0003,acrA-BAC0005,acrB-BAC0006,acrD/yffA-BAC0008,acrE/envC-BAC0009,acrF/envD-BAC0010,actP/yjcG-BAC0564,arsA-BAC0571,arsB-BAC0576,arsC-BAC0582,arsC-BAC0583,arsD-BAC0587,arsP-BAC0036,arsR-BAC0594,asr-BAC0038,baeS-BAC0040,bfrA-BAC0048,bhsA/ycfR/comC-BAC0049,comR/ycfQ-BAC0076,copA-BAC0725,copS-BAC0752,corA-BAC0086,corB-BAC0643,corD-BAC0644,cpxA-BAC0532,cueO-BAC0103,cueR/ybbI-BAC0105,cusA/ybdE-…	NA	NA	NA	NA	NA	NA	NA	NA	NA	NA	2017-06-22	healthcare associated 31-365d	K84012	F	90	PRJNA604975	SAMN18262843
OX-BSI-147_3	361b05d4-dcde-44f6-af85-24bb2c695313	361b05d4-dcde-44f6-af85-24bb2c695313_3	Plasmid	BSI	6647	48.52	ecoli	69	NA	NA	17	35	NA	NA	ColRNAI_1	NA	MOBP	-	MOBP	mobilizable	PTU-E1	III	1	NA	NA	NA	2017-06-22	healthcare associated 31-365d	K84012	F	90	PRJNA604975	SAMN18262843
OX-BSI-147_5	361b05d4-dcde-44f6-af85-24bb2c695313	361b05d4-dcde-44f6-af85-24bb2c695313_5	Plasmid	BSI	4082	49.39	ecoli	69	NA	NA	21	29	NA	NA	Col8282_1	NA	MOBQ,MOBQ	-	MOBQ,MOBQ	mobilizable	PTU-E10	III	1	NA	NA	NA	2017-06-22	healthcare associated 31-365d	K84012	F	90	PRJNA604975	SAMN18262843
OX-BSI-148_2	363148f7-0109-4750-a165-aed14be03199	363148f7-0109-4750-a165-aed14be03199_2	Plasmid	BSI	140455	49.65	ecoli	95	NA	NA	2	100	aadA1,aadA2,blaTEM-1,catA1,cmlA1,dfrA12,qacL,sul3,tet(B)	IS10L,IS1R,IS629,ISEc17,Tn3	IncFIB(AP001918)_1,IncFIC(FII)_1	bcr-BAC0041,blt-BAC0050,merA-BAC0652,merC-BAC0664,merD-BAC0666,merE-BAC0670,merP-BAC0678,merR-BAC0232,merT-BAC0693,qacF-BAC0324,smdB-BAC0354,tupC-BAC0607	MOBF,MOBP	MPF_F	MOBF	conjugative	PTU-FE	III	1	NA	NA	NA	2009-09-02	healthcare associated 31-365d	K84019	F	84	PRJNA604975	SAMN18262842
OX-BSI-148_3	363148f7-0109-4750-a165-aed14be03199	363148f7-0109-4750-a165-aed14be03199_3	Plasmid	BSI	69104	50.84	ecoli	95	NA	NA	12	42	NA	NA	IncFII(pRSB107)_1_pRSB107	NA	MOBF	MPF_F	MOBF	conjugative	PTU-FE	III	1	NA	NA	NA	2009-09-02	healthcare associated 31-365d	K84019	F	84	PRJNA604975	SAMN18262842
OX-BSI-148_1	363148f7-0109-4750-a165-aed14be03199	363148f7-0109-4750-a165-aed14be03199_chromo	Chromosome	BSI	5156752	50.67	ecoli	95	NA	NA	NA	NA	NA	IS100kyp,IS1203,IS1A,IS1F,IS2,IS4,IS621,IS911,ISEc20,ISEc30,ISEc38,ISEc48,ISSd1	NA	acn-BAC0003,acrA-BAC0005,acrD/yffA-BAC0008,acrE/envC-BAC0009,acrF/envD-BAC0010,actP/yjcG-BAC0564,arsC-BAC0582,arsC-BAC0583,asr-BAC0038,baeS-BAC0040,bfrA-BAC0048,bhsA/ycfR/comC-BAC0049,comR/ycfQ-BAC0076,copA-BAC0725,corA-BAC0086,corB-BAC0643,corD-BAC0644,cpxA-BAC0532,cueO-BAC0103,cueR/ybbI-BAC0105,cusA/ybdE-BAC0107,cusB-BAC0108,cusC/ylcB-BAC0109,cusF/cusX-BAC0110,cusR/ylcA-BAC0111,cusS-BAC0112,cut…	NA	NA	NA	NA	NA	NA	NA	NA	NA	NA	2009-09-02	healthcare associated 31-365d	K84019	F	84	PRJNA604975	SAMN18262842
OX-BSI-149_2	37a65946-9349-4e2b-a92f-a3c867218fb6	37a65946-9349-4e2b-a92f-a3c867218fb6_2	Plasmid	BSI	71315	46.2	ecoli	537	NA	NA	NA	NA	NA	IS100kyp,IS1F,IS682,ISEc17,ISEc21,ISEc31,ISEc45	NA	cpxR-BAC0533,fecE-BAC0164	-	-	-	non-mobilizable	-	-	1	NA	NA	NA	2018-03-13	healthcare associated 0-30d	K84075	M	75	PRJNA604975	SAMN18262540
OX-BSI-149_1	37a65946-9349-4e2b-a92f-a3c867218fb6	37a65946-9349-4e2b-a92f-a3c867218fb6_chromo	Chromosome	BSI	5034109	50.4	ecoli	537	NA	NA	NA	NA	blaEC-5	IS1397,IS200C,IS3,IS621,IS630,ISEc20,ISEc39,ISEc40,ISEc42,ISEc45	NA	acn-BAC0003,acrA-BAC0005,acrD/yffA-BAC0008,acrE/envC-BAC0009,acrF/envD-BAC0010,actP/yjcG-BAC0564,arsC-BAC0582,arsC-BAC0583,asr-BAC0038,baeS-BAC0040,bfrA-BAC0048,bhsA/ycfR/comC-BAC0049,comR/ycfQ-BAC0076,copA-BAC0725,copS-BAC0752,corA-BAC0086,corB-BAC0643,corD-BAC0644,cpxA-BAC0532,cueO-BAC0103,cueR/ybbI-BAC0105,cusA/ybdE-BAC0107,cusB-BAC0108,cusC/ylcB-BAC0109,cusF/cusX-BAC0110,cusR/ylcA-BAC0111,cus…	NA	NA	NA	NA	NA	NA	NA	NA	NA	NA	2018-03-13	healthcare associated 0-30d	K84075	M	75	PRJNA604975	SAMN18262540
OX-BSI-150_3	37eaccb8-0b43-4a5b-8e99-0067fef3880d	37eaccb8-0b43-4a5b-8e99-0067fef3880d_3	Plasmid	BSI	157201	47.45	ecoli	428	NA	NA	NA	NA	NA	ISCro1,ISEc32	IncFIB(AP001918)_1	smdA-BAC0353	MOBF	MPF_F	-	conjugative	-	-	1	NA	NA	NA	2009-10-15	healthcare associated 31-365d	K82045	M	54	PRJNA604975	SAMN18262536
OX-BSI-150_1	37eaccb8-0b43-4a5b-8e99-0067fef3880d	37eaccb8-0b43-4a5b-8e99-0067fef3880d_chromo	Chromosome	BSI	5028050	50.39	ecoli	428	NA	NA	NA	NA	NA	IS1397,IS1A,ISEc1,ISEc14	NA	acn-BAC0003,acrA-BAC0005,acrD/yffA-BAC0008,acrE/envC-BAC0009,acrF/envD-BAC0010,actP/yjcG-BAC0564,arsC-BAC0582,arsC-BAC0583,asr-BAC0038,baeS-BAC0040,bfrA-BAC0048,bhsA/ycfR/comC-BAC0049,comR/ycfQ-BAC0076,copA-BAC0725,copS-BAC0752,corA-BAC0086,corB-BAC0643,corD-BAC0644,cpxA-BAC0532,cueO-BAC0103,cueR/ybbI-BAC0105,cusA/ybdE-BAC0107,cusB-BAC0108,cusC/ylcB-BAC0109,cusF/cusX-BAC0110,cusR/ylcA-BAC0111,cus…	NA	NA	NA	NA	NA	NA	NA	NA	NA	NA	2009-10-15	healthcare associated 31-365d	K82045	M	54	PRJNA604975	SAMN18262536
OX-BSI-150_2	37eaccb8-0b43-4a5b-8e99-0067fef3880d	37eaccb8-0b43-4a5b-8e99-0067fef3880d_2	Plasmid	BSI	226990	46.47	ecoli	428	NA	NA	33	19	aadA1,aph(3'')-Ib,aph(6)-Id,blaTEM-1,dfrA1,qacEdelta1,sul1,sul2,tet(A)	IS1326,IS1R	IncHI2_1,IncHI2A_1,RepA_1_pKPC-CAV1321	blt-BAC0050,dsbC-BAC0138,merA-BAC0652,merC-BAC0664,merD-BAC0666,merE-BAC0670,merP-BAC0678,merR-BAC0232,merT-BAC0693,qacEdelta1-BAC0323,terA-BAC0386,terB-BAC0387,terC-BAC0388,terE-BAC0390,terW-BAC0391,terZ-BAC0392	MOBH	MPF_F	MOBH	conjugative	PTU-HI2	IV	1	NA	NA	NA	2009-10-15	healthcare associated 31-365d	K82045	M	54	PRJNA604975	SAMN18262536
OX-BSI-151_5	38434407-fa5f-4296-99be-2750909179f9	38434407-fa5f-4296-99be-2750909179f9_5	Plasmid	BSI	1550	51.61	ecoli	219	NA	NA	6	62	NA	NA	Col(MG828)_1	NA	-	-	MOB_unknown,MOBP	mobilizable	PTU-E9	VI	1	NA	NA	NA	2018-05-28	nosocomial	K84046	F	82	PRJNA604975	SAMN18262532
OX-BSI-151_4	38434407-fa5f-4296-99be-2750909179f9	38434407-fa5f-4296-99be-2750909179f9_4	Plasmid	BSI	5732	47.59	ecoli	219	NA	NA	NA	NA	NA	NA	Col156_1	NA	MOBQ	-	-	mobilizable	PTU-E7	III	1	NA	NA	NA	2018-05-28	nosocomial	K84046	F	82	PRJNA604975	SAMN18262532
OX-BSI-151_3	38434407-fa5f-4296-99be-2750909179f9	38434407-fa5f-4296-99be-2750909179f9_3	Plasmid	BSI	93160	49.24	ecoli	219	NA	NA	NA	NA	NA	IS1A,IS2,IS3,IS679,ISEc23	IncFIB(AP001918)_1,IncFIC(FII)_1	NA	MOBF	MPF_F	-	conjugative	PTU-FE	III	0.9655	NA	NA	NA	2018-05-28	nosocomial	K84046	F	82	PRJNA604975	SAMN18262532
OX-BSI-151_1	38434407-fa5f-4296-99be-2750909179f9	38434407-fa5f-4296-99be-2750909179f9_chromo	Chromosome	BSI	5081435	50.6	ecoli	219	NA	NA	NA	NA	aadA1,aph(3'')-Ib,aph(6)-Id,blaTEM-1,dfrA1,dfrA36,mph(B),qacEdelta1,sul1,sul2,sul2,tet(A)	IS1203,IS1326,IS1H,IS26,IS629,IS679,ISEc1,ISEc20,ISEc38,ISVsa3	NA	acn-BAC0003,acrA-BAC0005,acrD/yffA-BAC0008,acrE/envC-BAC0009,acrF/envD-BAC0010,actP/yjcG-BAC0564,arsB-BAC0576,arsC-BAC0583,arsC-BAC0584,arsP-BAC0036,arsR-BAC0594,asr-BAC0038,baeS-BAC0040,bfrA-BAC0048,bhsA/ycfR/comC-BAC0049,blt-BAC0050,comR/ycfQ-BAC0076,copA-BAC0725,copG-BAC0717,copS-BAC0752,corA-BAC0086,corB-BAC0643,corC-BAC0088,corD-BAC0644,cpxA-BAC0532,cueO-BAC0103,cueR/ybbI-BAC0105,cusA/ybdE-B…	NA	NA	NA	NA	NA	NA	NA	NA	NA	NA	2018-05-28	nosocomial	K84046	F	82	PRJNA604975	SAMN18262532
OX-BSI-151_2	38434407-fa5f-4296-99be-2750909179f9	38434407-fa5f-4296-99be-2750909179f9_2	Plasmid	BSI	98026	47.93	ecoli	219	NA	NA	71	9	NA	NA	IncY_1	opmD/nmpC-BAC0290	-	-	-	non-mobilizable	PTU-Y	III	0.9524	NA	NA	NA	2018-05-28	nosocomial	K84046	F	82	PRJNA604975	SAMN18262532
OX-BSI-152_8	389ef33b-8677-40b6-b160-3102d31d3e2b	389ef33b-8677-40b6-b160-3102d31d3e2b_8	Plasmid	BSI	1552	51.93	ecoli	69	22	5	6	62	NA	NA	Col(MG828)_1	NA	-	-	MOB_unknown	mobilizable	PTU-E9	VI	1	NA	NA	NA	2018-02-27	healthcare associated 31-365d	K84618	M	66	PRJNA604975	SAMN18262528
OX-BSI-152_7	389ef33b-8677-40b6-b160-3102d31d3e2b	389ef33b-8677-40b6-b160-3102d31d3e2b_7	Plasmid	BSI	3875	55.56	ecoli	69	NA	NA	NA	NA	NA	NA	Col440II_1,ColRNAI_1	NA	MOBP,MOBP	-	MOBP	mobilizable	PTU-E3	V	0.9091	NA	NA	NA	2018-02-27	healthcare associated 31-365d	K84618	M	66	PRJNA604975	SAMN18262528
OX-BSI-152_1	389ef33b-8677-40b6-b160-3102d31d3e2b	389ef33b-8677-40b6-b160-3102d31d3e2b_chromo	Chromosome	BSI	5055596	50.76	ecoli	69	NA	NA	NA	NA	NA	IS1F,IS30,ISEc10,ISEc17,ISEc22,ISEc31,ISEc38,ISEc46,ISEc8	NA	acn-BAC0003,acrA-BAC0005,acrB-BAC0006,acrD/yffA-BAC0008,acrE/envC-BAC0009,acrF/envD-BAC0010,actP/yjcG-BAC0564,arsA-BAC0571,arsB-BAC0576,arsC-BAC0582,arsC-BAC0583,arsD-BAC0587,arsP-BAC0036,arsR-BAC0594,asr-BAC0038,baeS-BAC0040,bfrA-BAC0048,bhsA/ycfR/comC-BAC0049,comR/ycfQ-BAC0076,copA-BAC0725,copS-BAC0752,corA-BAC0086,corB-BAC0643,corD-BAC0644,cpxA-BAC0532,cueO-BAC0103,cueR/ybbI-BAC0105,cusA/ybdE-…	NA	NA	NA	NA	NA	NA	NA	NA	NA	NA	2018-02-27	healthcare associated 31-365d	K84618	M	66	PRJNA604975	SAMN18262528
OX-BSI-152_5	389ef33b-8677-40b6-b160-3102d31d3e2b	389ef33b-8677-40b6-b160-3102d31d3e2b_5	Plasmid	BSI	7462	48.3	ecoli	69	NA	NA	54	11	NA	NA	Col156_1	NA	MOBQ	-	-	mobilizable	PTU-E7	III	1	NA	NA	NA	2018-02-27	healthcare associated 31-365d	K84618	M	66	PRJNA604975	SAMN18262528
OX-BSI-152_6	389ef33b-8677-40b6-b160-3102d31d3e2b	389ef33b-8677-40b6-b160-3102d31d3e2b_6	Plasmid	BSI	4072	49.8	ecoli	69	NA	NA	9	51	NA	NA	Col8282_1	NA	MOBQ	-	MOBQ,MOBQ	mobilizable	PTU-E10	III	1	NA	NA	NA	2018-02-27	healthcare associated 31-365d	K84618	M	66	PRJNA604975	SAMN18262528
OX-BSI-152_3	389ef33b-8677-40b6-b160-3102d31d3e2b	389ef33b-8677-40b6-b160-3102d31d3e2b_3	Plasmid	BSI	137625	51.57	ecoli	69	NA	NA	30	21	aadA5,blaTEM-1,dfrA17,qacEdelta1,sul1,tet(B)	IS100kyp,IS26,IS5,ISCro1,ISSm1	Col156_1,IncFIA_1,IncFIB(AP001918)_1,IncFIC(FII)_1	blt-BAC0050,qacEdelta1-BAC0323	MOBF,MOBP	MPF_F	MOBF	conjugative	PTU-FE	III	1	NA	NA	NA	2018-02-27	healthcare associated 31-365d	K84618	M	66	PRJNA604975	SAMN18262528
OX-BSI-152_4	389ef33b-8677-40b6-b160-3102d31d3e2b	389ef33b-8677-40b6-b160-3102d31d3e2b_4	Plasmid	BSI	87309	50.15	ecoli	69	NA	NA	3	73	NA	IS200C	IncI1_1_Alpha	pmrG-BAC0486	MOBP	MPF_I	MOBP	conjugative	PTU-I1	III	1	NA	NA	NA	2018-02-27	healthcare associated 31-365d	K84618	M	66	PRJNA604975	SAMN18262528
OX-BSI-153_2	38c36f78-30c3-4d82-880f-b9bca9f732ed_contig	38c36f78-30c3-4d82-880f-b9bca9f732ed_contig_2	Plasmid	BSI	63589	51.22	koxytoca	27	8	7	84	7	blaOXA-48	NA	IncL/M(pOXA-48)_1_pOXA-48	adeL-BAC0508	MOBP	MPF_I	-	conjugative	PTU-L/M	IV	1	NA	NA	NA	NA	NA	NA	NA	NA	PRJNA604975	NA
OX-BSI-153_3	38c36f78-30c3-4d82-880f-b9bca9f732ed_contig	38c36f78-30c3-4d82-880f-b9bca9f732ed_contig_3	Plasmid	BSI	4870	52.22	koxytoca	27	NA	NA	51	12	NA	NA	Col440II_1,ColRNAI_1	NA	MOBP	-	MOBP	mobilizable	PTU-E3	V	0.8657	NA	NA	NA	NA	NA	NA	NA	NA	PRJNA604975	NA
OX-BSI-153_1	38c36f78-30c3-4d82-880f-b9bca9f732ed_contig	38c36f78-30c3-4d82-880f-b9bca9f732ed_contig_chromo	Chromosome	BSI	6159432	55.9	koxytoca	27	NA	NA	NA	NA	aph(3')-Ia,blaOXY-1-1,oqxA,oqxB	IS1A,ISEc42	NA	acn-BAC0003,acrA-BAC0005,acrC-BAC0007,acrD-BAC0563,acrE/envC-BAC0009,acrF/envD-BAC0010,actP/yjcG-BAC0564,arsB-BAC0576,arsB-BAC0577,arsB-BAC0578,arsH-BAC0034,arsR-BAC0588,arsR-BAC0589,arsR-BAC0591,baeS-BAC0040,bepG-BAC0046,bfrA-BAC0048,bhsA/ycfR/comC-BAC0049,comR/ycfQ-BAC0076,copA-BAC0725,copG-BAC0717,copR-BAC0083,copS-BAC0637,corA-BAC0086,corB-BAC0643,corD-BAC0644,cpxA-BAC0532,cueR/ybbI-BAC0105,c…	NA	NA	NA	NA	NA	NA	NA	NA	NA	NA	NA	NA	NA	NA	NA	PRJNA604975	NA
OX-BSI-154_6	396bbe16-2273-4d30-a8d9-a8bf02100db9	396bbe16-2273-4d30-a8d9-a8bf02100db9_6	Plasmid	BSI	1459	50.93	ecoli	131	NA	NA	NA	NA	NA	NA	Col(MG828)_1	NA	-	-	MOBP	mobilizable	PTU-E9	VI	1	NA	NA	NA	2017-08-25	healthcare associated 0-30d	K84072	F	73	PRJNA604975	SAMN18262519
OX-BSI-154_4	396bbe16-2273-4d30-a8d9-a8bf02100db9	396bbe16-2273-4d30-a8d9-a8bf02100db9_4	Plasmid	BSI	4084	49.24	ecoli	131	NA	NA	21	29	NA	NA	Col8282_1	NA	MOBQ	-	MOBQ,MOBQ	mobilizable	PTU-E10	III	1	NA	NA	NA	2017-08-25	healthcare associated 0-30d	K84072	F	73	PRJNA604975	SAMN18262519
OX-BSI-154_2	396bbe16-2273-4d30-a8d9-a8bf02100db9	396bbe16-2273-4d30-a8d9-a8bf02100db9_2	Plasmid	BSI	111075	46.28	ecoli	131	NA	NA	27	23	NA	ISEc52	NA	NA	-	-	-	non-mobilizable	PTU-E16	I	1	NA	NA	NA	2017-08-25	healthcare associated 0-30d	K84072	F	73	PRJNA604975	SAMN18262519
OX-BSI-154_5	396bbe16-2273-4d30-a8d9-a8bf02100db9	396bbe16-2273-4d30-a8d9-a8bf02100db9_5	Plasmid	BSI	1553	51.84	ecoli	131	NA	NA	6	62	NA	NA	Col(MG828)_1	NA	-	-	MOB_unknown,MOBP	mobilizable	PTU-E9	VI	1	NA	NA	NA	2017-08-25	healthcare associated 0-30d	K84072	F	73	PRJNA604975	SAMN18262519
OX-BSI-154_1	396bbe16-2273-4d30-a8d9-a8bf02100db9	396bbe16-2273-4d30-a8d9-a8bf02100db9_chromo	Chromosome	BSI	5034806	50.77	ecoli	131	NA	NA	NA	NA	NA	IS100kyp,IS1203,IS150,IS1F,IS2,IS200C,IS30,IS609,ISEc1,ISEc20,ISEc24,ISEc38,ISEc53,ISEc8,ISSd1	NA	acn-BAC0003,acrA-BAC0005,acrD/yffA-BAC0008,acrE/envC-BAC0009,acrF/envD-BAC0010,actP/yjcG-BAC0564,arsC-BAC0582,arsC-BAC0583,asr-BAC0038,baeS-BAC0040,bfrA-BAC0048,bhsA/ycfR/comC-BAC0049,comR/ycfQ-BAC0076,copA-BAC0725,corA-BAC0086,corB-BAC0643,corD-BAC0644,cpxA-BAC0532,cueO-BAC0103,cueR/ybbI-BAC0105,cusA/ybdE-BAC0107,cusB-BAC0108,cusC/ylcB-BAC0109,cusF/cusX-BAC0110,cusR/ylcA-BAC0111,cusS-BAC0112,cut…	NA	NA	NA	NA	NA	NA	NA	NA	NA	NA	2017-08-25	healthcare associated 0-30d	K84072	F	73	PRJNA604975	SAMN18262519
OX-BSI-154_3	396bbe16-2273-4d30-a8d9-a8bf02100db9	396bbe16-2273-4d30-a8d9-a8bf02100db9_3	Plasmid	BSI	51716	50.36	ecoli	131	NA	NA	NA	NA	aac(6')-Ib-cr5,aadA5,blaCTX-M-15,blaOXA-1,catB3,dfrA17,tet(A)	IS100kyp,IS15DIV,IS26,ISEc9,Tn5403	IncFIA_1,IncFIB(AP001918)_1	blt-BAC0050	-	-	-	non-mobilizable	PTU-FE	III	0.9882	NA	NA	NA	2017-08-25	healthcare associated 0-30d	K84072	F	73	PRJNA604975	SAMN18262519
OX-BSI-155_1	3a9e40a3-d151-43f1-b82e-9decb5d23dcc	3a9e40a3-d151-43f1-b82e-9decb5d23dcc_chromo	Chromosome	BSI	5140465	50.88	ecoli	409	NA	NA	NA	NA	NA	IS1414,IS186B,IS1F,IS1H,IS26,IS421,ISEc30,ISEc35,ISEc38,ISEc5,ISKpn24,ISPa16,ISPa38,Tn5403,TnEc1	p0111_1	acn-BAC0003,acrA-BAC0005,acrB-BAC0006,acrD/yffA-BAC0008,acrE/envC-BAC0009,acrF/envD-BAC0010,actP/yjcG-BAC0564,arsA-BAC0571,arsA-BAC0572,arsB-BAC0576,arsB-BAC0578,arsC-BAC0584,arsD-BAC0587,arsH-BAC0034,arsR-BAC0591,arsR-BAC0594,asr-BAC0038,baeS-BAC0040,bfrA-BAC0048,bhsA/ycfR/comC-BAC0049,cepA-BAC0061,chrA-BAC0026,chrB-BAC0027,comR/ycfQ-BAC0076,copA-BAC0725,copG-BAC0717,corA-BAC0086,corB-BAC0643,co…	NA	NA	NA	NA	NA	NA	NA	NA	NA	NA	2009-01-15	community	K84046	M	79	PRJNA604975	SAMN18262512
OX-BSI-156_2	3accfe81-a401-4a19-98f9-149e6e717366	3accfe81-a401-4a19-98f9-149e6e717366_2	Plasmid	BSI	114222	51.02	ecoli	73	NA	NA	1	123	NA	IS100kyp,IS21,IS26,ISEc10,ISEc53	Col156_1,IncFIB(AP001918)_1,IncFII(29)_1_pUTI89	NA	MOBF,MOBP	MPF_F	MOBF	conjugative	PTU-FE	III	0.9941	NA	NA	NA	2018-01-11	healthcare associated 31-365d	K84072	F	73	PRJNA604975	SAMN18262510
OX-BSI-156_1	3accfe81-a401-4a19-98f9-149e6e717366	3accfe81-a401-4a19-98f9-149e6e717366_chromo	Chromosome	BSI	5147911	50.64	ecoli	73	NA	NA	NA	NA	blaEC-5	IS100kyp,IS1203,IS1F,IS2,IS21,IS30,IS4,IS630,ISCro1,ISEc20,ISEc22,ISEc39,ISEc41,ISEc42,ISEc43,ISEc45,ISEc49,ISEc8,ISSd1	NA	acn-BAC0003,acrA-BAC0005,acrB-BAC0006,acrD/yffA-BAC0008,acrE/envC-BAC0009,acrF/envD-BAC0010,actP/yjcG-BAC0564,adeE-BAC0013,arsC-BAC0582,arsC-BAC0583,asr-BAC0038,baeS-BAC0040,bfrA-BAC0048,bhsA/ycfR/comC-BAC0049,comR/ycfQ-BAC0076,copA-BAC0725,corA-BAC0086,corB-BAC0643,corD-BAC0644,cpxA-BAC0532,cueO-BAC0103,cueR/ybbI-BAC0105,cusA/ybdE-BAC0107,cusB-BAC0108,cusC/ylcB-BAC0109,cusF/cusX-BAC0110,cusS-BAC…	NA	NA	NA	NA	NA	NA	NA	NA	NA	NA	2018-01-11	healthcare associated 31-365d	K84072	F	73	PRJNA604975	SAMN18262510
OX-BSI-156_5	3accfe81-a401-4a19-98f9-149e6e717366	3accfe81-a401-4a19-98f9-149e6e717366_5	Plasmid	BSI	4091	49.57	ecoli	73	NA	NA	85	7	NA	NA	Col8282_1	NA	MOBQ	-	MOBQ,MOBQ	mobilizable	PTU-E10	III	1	NA	NA	NA	2018-01-11	healthcare associated 31-365d	K84072	F	73	PRJNA604975	SAMN18262510
OX-BSI-156_4	3accfe81-a401-4a19-98f9-149e6e717366	3accfe81-a401-4a19-98f9-149e6e717366_4	Plasmid	BSI	5163	47.47	ecoli	73	7	5	4	69	NA	NA	Col156_1	NA	MOBQ	-	-	mobilizable	PTU-E7	III	1	NA	NA	NA	2018-01-11	healthcare associated 31-365d	K84072	F	73	PRJNA604975	SAMN18262510
OX-BSI-156_3	3accfe81-a401-4a19-98f9-149e6e717366	3accfe81-a401-4a19-98f9-149e6e717366_3	Plasmid	BSI	37097	41.29	ecoli	73	NA	NA	43	14	NA	NA	IncX4_2	triA-BAC0396,triC-BAC0398	MOBP	MPF_T	-	conjugative	PTU-X4	III	1	NA	NA	NA	2018-01-11	healthcare associated 31-365d	K84072	F	73	PRJNA604975	SAMN18262510
OX-BSI-156_6	3accfe81-a401-4a19-98f9-149e6e717366	3accfe81-a401-4a19-98f9-149e6e717366_6	Plasmid	BSI	3173	46.9	ecoli	73	NA	NA	32	19	NA	NA	ColRNAI_1	NA	MOBF	-	MOB_unknown	mobilizable	PTU-E1	III	0.9756	NA	NA	NA	2018-01-11	healthcare associated 31-365d	K84072	F	73	PRJNA604975	SAMN18262510
OX-BSI-157_5	3ae33e2d-e4ac-4152-86f6-9b629a7fff86	3ae33e2d-e4ac-4152-86f6-9b629a7fff86_5	Plasmid	BSI	7939	41.66	ecoli	-	NA	NA	41	14	NA	NA	ColRNAI_1	NA	MOBP,MOBP	-	MOBP	mobilizable	PTU-E1	III	0.9722	NA	NA	NA	2018-09-01	community	K84033	F	47	PRJNA604975	SAMN18262508
OX-BSI-157_7	3ae33e2d-e4ac-4152-86f6-9b629a7fff86	3ae33e2d-e4ac-4152-86f6-9b629a7fff86_7	Plasmid	BSI	5153	45.78	ecoli	-	NA	NA	89	7	NA	NA	ColRNAI_1	NA	MOBF	-	MOB_unknown	mobilizable	PTU-E1	III	0.9756	NA	NA	NA	2018-09-01	community	K84033	F	47	PRJNA604975	SAMN18262508
OX-BSI-157_3	3ae33e2d-e4ac-4152-86f6-9b629a7fff86	3ae33e2d-e4ac-4152-86f6-9b629a7fff86_3	Plasmid	BSI	89189	50.3	ecoli	-	NA	NA	3	73	NA	IS26	IncI1_1_Alpha	pmrG-BAC0486	MOBP	MPF_I	MOBP	conjugative	PTU-I1	III	1	NA	NA	NA	2018-09-01	community	K84033	F	47	PRJNA604975	SAMN18262508
OX-BSI-157_4	3ae33e2d-e4ac-4152-86f6-9b629a7fff86	3ae33e2d-e4ac-4152-86f6-9b629a7fff86_4	Plasmid	BSI	34433	42.06	ecoli	-	NA	NA	97	6	NA	NA	IncX1_1	triA-BAC0396,triC-BAC0398	MOBP	MPF_T	-	conjugative	PTU-E80	IV	1	NA	NA	NA	2018-09-01	community	K84033	F	47	PRJNA604975	SAMN18262508
OX-BSI-157_2	3ae33e2d-e4ac-4152-86f6-9b629a7fff86	3ae33e2d-e4ac-4152-86f6-9b629a7fff86_2	Plasmid	BSI	120652	51.19	ecoli	-	NA	NA	1	123	NA	IS100kyp,IS26,ISEc10,ISEc23,ISEc53,ISEc8,ISKpn26	Col156_1,IncFIB(AP001918)_1,IncFII(29)_1_pUTI89	NA	MOBF,MOBP	MPF_F	MOBF	conjugative	PTU-FE	III	0.9941	NA	NA	NA	2018-09-01	community	K84033	F	47	PRJNA604975	SAMN18262508
OX-BSI-157_1	3ae33e2d-e4ac-4152-86f6-9b629a7fff86	3ae33e2d-e4ac-4152-86f6-9b629a7fff86_chromo	Chromosome	BSI	4978334	50.69	ecoli	-	NA	NA	NA	NA	NA	IS100kyp,IS1203,IS1397,IS1F,IS2,IS609,IS621,ISEc17,ISEc40,ISEc42	NA	acn-BAC0003,acrA-BAC0005,acrD/yffA-BAC0008,acrE/envC-BAC0009,acrF/envD-BAC0010,actP/yjcG-BAC0564,arsC-BAC0582,arsC-BAC0583,asr-BAC0038,baeS-BAC0040,bfrA-BAC0048,bhsA/ycfR/comC-BAC0049,comR/ycfQ-BAC0076,copA-BAC0725,corA-BAC0086,corB-BAC0643,corD-BAC0644,cpxA-BAC0532,cueO-BAC0103,cueR/ybbI-BAC0105,cusA/ybdE-BAC0107,cusB-BAC0108,cusC/ylcB-BAC0109,cusF/cusX-BAC0110,cusR/ylcA-BAC0111,cusS-BAC0112,cut…	NA	NA	NA	NA	NA	NA	NA	NA	NA	NA	2018-09-01	community	K84033	F	47	PRJNA604975	SAMN18262508
OX-BSI-157_6	3ae33e2d-e4ac-4152-86f6-9b629a7fff86	3ae33e2d-e4ac-4152-86f6-9b629a7fff86_6	Plasmid	BSI	5167	47.46	ecoli	-	184	2	4	69	NA	NA	Col156_1	NA	MOBQ	-	-	mobilizable	PTU-E7	III	1	NA	NA	NA	2018-09-01	community	K84033	F	47	PRJNA604975	SAMN18262508
OX-BSI-157_8	3ae33e2d-e4ac-4152-86f6-9b629a7fff86	3ae33e2d-e4ac-4152-86f6-9b629a7fff86_8	Plasmid	BSI	4072	49.8	ecoli	-	NA	NA	9	51	NA	NA	Col8282_1	NA	MOBQ	-	MOBQ,MOBQ	mobilizable	PTU-E10	III	1	NA	NA	NA	2018-09-01	community	K84033	F	47	PRJNA604975	SAMN18262508
OX-BSI-158_2	3b43d804-7478-4eaf-9a7a-95e818e2dc8a	3b43d804-7478-4eaf-9a7a-95e818e2dc8a_2	Plasmid	BSI	151849	51.13	kpneumoniae	4275	NA	NA	NA	NA	NA	IS903B,ISEc15,ISKpn14	IncFII_1_pKP91,IncR_1	adeL-BAC0508,fptA-BAC0168,ybtP-BAC0432	MOBF,MOBF	MPF_F	-	conjugative	-	-	1	NA	NA	NA	2009-09-17	healthcare associated 0-30d	K83043	M	73	PRJNA604975	NA
OX-BSI-158_1	3b43d804-7478-4eaf-9a7a-95e818e2dc8a	3b43d804-7478-4eaf-9a7a-95e818e2dc8a_chromo	Chromosome	BSI	5402556	57.31	kpneumoniae	4275	NA	NA	NA	NA	blaSHV-108,fosA,oqxA,oqxB	ISEhe3,ISKpn1,ISSty2	NA	acn-BAC0003,acrA-BAC0005,acrB-BAC0006,acrC-BAC0007,acrD-BAC0563,acrE/envC-BAC0009,acrF/envD-BAC0010,actP/yjcG-BAC0564,adeE-BAC0013,arsB-BAC0578,arsC-BAC0582,arsC-BAC0583,arsR-BAC0589,baeR-BAC0596,baeS-BAC0040,bepG-BAC0046,bfrA-BAC0048,bhsA/ycfR/comC-BAC0049,cepA-BAC0061,comR/ycfQ-BAC0076,copA-BAC0725,corA-BAC0086,corB-BAC0643,corD-BAC0644,corR-BAC0089,cpxA-BAC0532,cueR/ybbI-BAC0105,cusA/ybdE-BAC0…	NA	NA	NA	NA	NA	NA	NA	NA	NA	NA	2009-09-17	healthcare associated 0-30d	K83043	M	73	PRJNA604975	NA
OX-BSI-159_1	3b6fded6-7625-4e20-9eaa-7f5765b2cdc4	3b6fded6-7625-4e20-9eaa-7f5765b2cdc4_chromo	Chromosome	BSI	5270951	57.49	kpneumoniae	1093	NA	NA	NA	NA	blaSHV-1,fosA,oqxA,oqxB25	IS1351,IS1400,IS1F,ISSty2	NA	acn-BAC0003,acrA-BAC0005,acrB-BAC0006,acrC-BAC0007,acrD-BAC0563,acrE/envC-BAC0009,acrF/envD-BAC0010,actP/yjcG-BAC0564,adeE-BAC0013,arsB-BAC0578,arsC-BAC0582,arsC-BAC0583,arsR-BAC0589,baeR-BAC0596,baeS-BAC0040,bepG-BAC0046,bfrA-BAC0048,bhsA/ycfR/comC-BAC0049,cepA-BAC0061,chrA-BAC0026,chrB-BAC0027,comR/ycfQ-BAC0076,copA-BAC0725,corA-BAC0086,corB-BAC0643,corD-BAC0644,corR-BAC0089,cpxA-BAC0532,cueR/y…	NA	NA	NA	NA	NA	NA	NA	NA	NA	NA	2009-10-28	healthcare associated 31-365d	K84027	F	96	PRJNA604975	NA
OX-BSI-160_2	3bc22448-4e66-4fc0-864f-8942d1bf7986	3bc22448-4e66-4fc0-864f-8942d1bf7986_2	Plasmid	BSI	122112	52.27	ecoli	297	NA	NA	13	41	aac(3)-IIe,aac(6')-Ib-cr5,aph(3'')-Ib,aph(6)-Id,blaCTX-M-15,blaOXA-1,blaTEM-1,catB3,dfrA14,sul2	IS102,IS5075,IS6100,ISEc9,ISKpn11	IncFII_1_pKP91	NA	MOBF,MOBF	MPF_F	-	conjugative	PTU-FK	III	1	NA	NA	NA	2016-07-27	nosocomial	K84041	M	92	PRJNA604975	NA
OX-BSI-160_3	3bc22448-4e66-4fc0-864f-8942d1bf7986	3bc22448-4e66-4fc0-864f-8942d1bf7986_3	Plasmid	BSI	47619	44.42	ecoli	297	NA	NA	39	15	NA	NA	NA	NA	-	-	-	non-mobilizable	PTU-?	I	1	NA	NA	NA	2016-07-27	nosocomial	K84041	M	92	PRJNA604975	NA
OX-BSI-160_4	3bc22448-4e66-4fc0-864f-8942d1bf7986	3bc22448-4e66-4fc0-864f-8942d1bf7986_4	Plasmid	BSI	37465	40.17	ecoli	297	228	2	NA	NA	NA	NA	IncX1_1	triA-BAC0396,triC-BAC0398	MOBP	MPF_T	-	conjugative	PTU-X1	III	1	NA	NA	NA	2016-07-27	nosocomial	K84041	M	92	PRJNA604975	NA
OX-BSI-160_1	3bc22448-4e66-4fc0-864f-8942d1bf7986	3bc22448-4e66-4fc0-864f-8942d1bf7986_chromo	Chromosome	BSI	5157981	50.6	ecoli	297	NA	NA	NA	NA	NA	IS100kyp,IS1414,IS1618,IS1F,IS1H,IS2,IS679,ISEc11,ISEc13,ISEc16,ISEc40,ISEc8	NA	acn-BAC0003,acrA-BAC0005,acrB-BAC0006,acrD/yffA-BAC0008,acrE/envC-BAC0009,acrF/envD-BAC0010,actP/yjcG-BAC0564,arsB-BAC0576,arsC-BAC0583,arsC-BAC0584,arsP-BAC0036,arsR-BAC0594,asr-BAC0038,baeS-BAC0040,bfrA-BAC0048,bhsA/ycfR/comC-BAC0049,comR/ycfQ-BAC0076,copA-BAC0725,copS-BAC0752,corA-BAC0086,corB-BAC0643,corD-BAC0644,cpxA-BAC0532,cueO-BAC0103,cueR/ybbI-BAC0105,cusA/ybdE-BAC0107,cusB-BAC0108,cusC/…	NA	NA	NA	NA	NA	NA	NA	NA	NA	NA	2016-07-27	nosocomial	K84041	M	92	PRJNA604975	NA
OX-BSI-161_2	3bccb69b-754a-4732-b5bb-7a34b359be35	3bccb69b-754a-4732-b5bb-7a34b359be35_2	Plasmid	BSI	141218	51.64	ecoli	131	NA	NA	1	123	aadA5,aph(3'')-Ib,aph(6)-Id,blaTEM-1,dfrA17,mph(A),qacEdelta1,sul1,sul2,tet(A)	IS100kyp,IS21,IS26,IS6100,ISEc23,ISEc53,ISShdy1	Col156_1,IncFIB(AP001918)_1,IncFII(29)_1_pUTI89	blt-BAC0050,qacEdelta1-BAC0323	MOBF,MOBP	MPF_F	MOBF	conjugative	PTU-FE	III	0.6905	NA	NA	NA	2018-04-07	nosocomial	K84007	M	81	PRJNA604975	SAMN18262504
OX-BSI-161_1	3bccb69b-754a-4732-b5bb-7a34b359be35	3bccb69b-754a-4732-b5bb-7a34b359be35_chromo	Chromosome	BSI	5000247	50.75	ecoli	131	NA	NA	NA	NA	NA	IS100kyp,IS1397,IS150,IS21,IS4,IS609,ISCro1,ISEc1,ISEc10,ISEc20,ISEc24,ISEc38,ISEc40,ISEc8	NA	acn-BAC0003,acrA-BAC0005,acrD/yffA-BAC0008,acrE/envC-BAC0009,acrF/envD-BAC0010,actP/yjcG-BAC0564,arsC-BAC0582,arsC-BAC0583,asr-BAC0038,baeS-BAC0040,bfrA-BAC0048,bhsA/ycfR/comC-BAC0049,comR/ycfQ-BAC0076,copA-BAC0725,copS-BAC0752,corA-BAC0086,corB-BAC0643,corD-BAC0644,cpxA-BAC0532,cueO-BAC0103,cueR/ybbI-BAC0105,cusA/ybdE-BAC0107,cusB-BAC0108,cusC/ylcB-BAC0109,cusF/cusX-BAC0110,cusR/ylcA-BAC0111,cus…	NA	NA	NA	NA	NA	NA	NA	NA	NA	NA	2018-04-07	nosocomial	K84007	M	81	PRJNA604975	SAMN18262504
OX-BSI-161_3	3bccb69b-754a-4732-b5bb-7a34b359be35	3bccb69b-754a-4732-b5bb-7a34b359be35_3	Plasmid	BSI	86868	49.97	ecoli	131	NA	NA	3	73	blaCTX-M-15	ISShdy1	IncI1_1_Alpha	pmrG-BAC0486	MOBP	MPF_I	MOBP	conjugative	PTU-I1	III	1	NA	NA	NA	2018-04-07	nosocomial	K84007	M	81	PRJNA604975	SAMN18262504
OX-BSI-162_2	3c0f34c7-9fc2-4993-8613-7c49cfa57a61	3c0f34c7-9fc2-4993-8613-7c49cfa57a61_2	Plasmid	BSI	63623	50.11	ecoli	73	NA	NA	190	3	NA	IS1F,IS30,ISEc52,ISEc8	NA	fecE-BAC0164	-	-	-	non-mobilizable	-	-	1	NA	NA	NA	2009-10-12	nosocomial	K84029	F	94	PRJNA604975	SAMN18262501
OX-BSI-162_4	3c0f34c7-9fc2-4993-8613-7c49cfa57a61	3c0f34c7-9fc2-4993-8613-7c49cfa57a61_4	Plasmid	BSI	8128	48.56	ecoli	73	NA	NA	86	7	blaTEM-1	NA	ColRNAI_1	NA	MOBF	-	MOB_unknown	mobilizable	-	-	1	NA	NA	NA	2009-10-12	nosocomial	K84029	F	94	PRJNA604975	SAMN18262501
OX-BSI-162_3	3c0f34c7-9fc2-4993-8613-7c49cfa57a61	3c0f34c7-9fc2-4993-8613-7c49cfa57a61_3	Plasmid	BSI	30394	41.44	ecoli	73	NA	NA	191	3	blaTEM-1	ISEc52,Tn3	NA	NA	-	-	-	non-mobilizable	-	-	0.5	NA	NA	NA	2009-10-12	nosocomial	K84029	F	94	PRJNA604975	SAMN18262501
OX-BSI-162_1	3c0f34c7-9fc2-4993-8613-7c49cfa57a61	3c0f34c7-9fc2-4993-8613-7c49cfa57a61_chromo	Chromosome	BSI	4942981	50.61	ecoli	73	NA	NA	NA	NA	blaEC-5	IS100kyp,IS200C,IS4,IS630,ISEc13,ISEc16,ISEc20,ISEc22,ISEc39,ISEc40,ISEc41,ISEc42	NA	acn-BAC0003,acrA-BAC0005,acrD/yffA-BAC0008,acrE/envC-BAC0009,acrF/envD-BAC0010,actP/yjcG-BAC0564,arsC-BAC0582,arsC-BAC0583,asr-BAC0038,baeS-BAC0040,bfrA-BAC0048,bhsA/ycfR/comC-BAC0049,comR/ycfQ-BAC0076,copA-BAC0725,corA-BAC0086,corB-BAC0643,corD-BAC0644,cpxA-BAC0532,cueO-BAC0103,cueR/ybbI-BAC0105,cusA/ybdE-BAC0107,cusB-BAC0108,cusC/ylcB-BAC0109,cusF/cusX-BAC0110,cusR/ylcA-BAC0111,cusS-BAC0112,cut…	NA	NA	NA	NA	NA	NA	NA	NA	NA	NA	2009-10-12	nosocomial	K84029	F	94	PRJNA604975	SAMN18262501
OX-BSI-163_3	3c5148c1-5637-41d8-995b-ba4a6c050b12	3c5148c1-5637-41d8-995b-ba4a6c050b12_3	Plasmid	BSI	3771	41.95	kpneumoniae	37	NA	NA	NA	NA	NA	NA	Col440I_1	NA	-	-	-	non-mobilizable	-	-	1	NA	NA	NA	NA	NA	NA	NA	NA	PRJNA604975	NA
OX-BSI-163_2	3c5148c1-5637-41d8-995b-ba4a6c050b12	3c5148c1-5637-41d8-995b-ba4a6c050b12_2	Plasmid	BSI	221724	52.59	kpneumoniae	37	NA	NA	16	37	aph(3'')-Ib,aph(3')-Ia,aph(6)-Id,blaTEM-1,dfrA14,sul1,sul2,tet(D)	IS1F,IS1X3,IS6100,ISEc8,ISEcl1,ISKpn26,ISKpn28,Tn3	IncFIB(K)_1_Kpn3,IncFII_1_pKP91	arsA-BAC0571,arsB-BAC0578,arsC-BAC0584,arsH-BAC0034,arsR-BAC0589,copG-BAC0717,fecE-BAC0164,nikB-BAC0271,nikC-BAC0272,nikD-BAC0273,norA-BAC0282,pcoA-BAC0303,pcoB-BAC0304,pcoC-BAC0305,pcoD-BAC0306,pcoE-BAC0307,pcoR-BAC0308,pcoS-BAC0309,silA-BAC0341,silB-BAC0342,silC-BAC0343,silE-BAC0344,silF-BAC0345,silP-BAC0346,silR-BAC0347,silS-BAC0348,yfeB-BAC0440	MOBF,MOBF	MPF_F	-	conjugative	PTU-FK	III	0.9766	NA	NA	NA	NA	NA	NA	NA	NA	PRJNA604975	NA
OX-BSI-163_1	3c5148c1-5637-41d8-995b-ba4a6c050b12	3c5148c1-5637-41d8-995b-ba4a6c050b12_chromo	Chromosome	BSI	5258227	57.47	kpneumoniae	37	NA	NA	NA	NA	blaSHV-11,fosA,oqxA,oqxB	IS2,IS5075,IS903,ISEc33,ISKox1	NA	acn-BAC0003,acrA-BAC0005,acrB-BAC0006,acrC-BAC0007,acrD-BAC0563,acrE/envC-BAC0009,acrF/envD-BAC0010,actP/yjcG-BAC0564,adeE-BAC0013,arsB-BAC0578,arsC-BAC0582,arsC-BAC0583,arsR-BAC0589,baeR-BAC0596,baeS-BAC0040,bepG-BAC0046,bfrA-BAC0048,bhsA/ycfR/comC-BAC0049,cepA-BAC0061,chrA-BAC0026,chrB-BAC0027,comR/ycfQ-BAC0076,copA-BAC0725,corA-BAC0086,corB-BAC0643,corD-BAC0644,corR-BAC0089,cpxA-BAC0532,cueR/y…	NA	NA	NA	NA	NA	NA	NA	NA	NA	NA	NA	NA	NA	NA	NA	PRJNA604975	NA
OX-BSI-164_2	3d06adba-9ec1-4fc6-b246-c58eb5569dfe	3d06adba-9ec1-4fc6-b246-c58eb5569dfe_2	Plasmid	BSI	84583	50.9	ecoli	1193	NA	NA	5	68	blaTEM-1	IS100kyp,IS1R	Col156_1,IncFIA_1,IncFIB(AP001918)_1	merR-BAC0232	MOBP	-	-	mobilizable	PTU-FE	III	0.6905	NA	NA	NA	2018-08-19	healthcare associated 31-365d	K84016	M	77	PRJNA604975	SAMN18262490
OX-BSI-164_3	3d06adba-9ec1-4fc6-b246-c58eb5569dfe	3d06adba-9ec1-4fc6-b246-c58eb5569dfe_3	Plasmid	BSI	78342	51.84	ecoli	1193	NA	NA	12	42	NA	IS903B	IncFII_1	NA	MOBF	MPF_F	MOBF	conjugative	PTU-FE	III	1	NA	NA	NA	2018-08-19	healthcare associated 31-365d	K84016	M	77	PRJNA604975	SAMN18262490
OX-BSI-164_4	3d06adba-9ec1-4fc6-b246-c58eb5569dfe	3d06adba-9ec1-4fc6-b246-c58eb5569dfe_4	Plasmid	BSI	5881	47.42	ecoli	1193	NA	NA	11	43	NA	NA	ColRNAI_1	NA	MOBP	-	MOBP	mobilizable	-	-	1	NA	NA	NA	2018-08-19	healthcare associated 31-365d	K84016	M	77	PRJNA604975	SAMN18262490
OX-BSI-164_1	3d06adba-9ec1-4fc6-b246-c58eb5569dfe	3d06adba-9ec1-4fc6-b246-c58eb5569dfe_chromo	Chromosome	BSI	5051069	50.65	ecoli	1193	NA	NA	NA	NA	blaEC-5	IS1203,IS1397,IS1F,IS1R,IS30,IS4,IS609,IS621,IS903B,IS911,ISEc21,ISEc30,ISEc31,ISEc40,ISEc42	NA	acn-BAC0003,acrA-BAC0005,acrD/yffA-BAC0008,acrE/envC-BAC0009,acrF/envD-BAC0010,actP/yjcG-BAC0564,arsC-BAC0582,arsC-BAC0583,asr-BAC0038,baeS-BAC0040,bfrA-BAC0048,bhsA/ycfR/comC-BAC0049,comR/ycfQ-BAC0076,copA-BAC0725,copS-BAC0752,corA-BAC0086,corB-BAC0643,corD-BAC0644,cpxA-BAC0532,cueO-BAC0103,cueR/ybbI-BAC0105,cusA/ybdE-BAC0107,cusB-BAC0108,cusC/ylcB-BAC0109,cusF/cusX-BAC0110,cusR/ylcA-BAC0111,cus…	NA	NA	NA	NA	NA	NA	NA	NA	NA	NA	2018-08-19	healthcare associated 31-365d	K84016	M	77	PRJNA604975	SAMN18262490
OX-BSI-164_5	3d06adba-9ec1-4fc6-b246-c58eb5569dfe	3d06adba-9ec1-4fc6-b246-c58eb5569dfe_5	Plasmid	BSI	5165	47.53	ecoli	1193	NA	NA	4	69	NA	NA	Col156_1	NA	MOBQ	-	-	mobilizable	PTU-E7	III	1	NA	NA	NA	2018-08-19	healthcare associated 31-365d	K84016	M	77	PRJNA604975	SAMN18262490
OX-BSI-164_7	3d06adba-9ec1-4fc6-b246-c58eb5569dfe	3d06adba-9ec1-4fc6-b246-c58eb5569dfe_7	Plasmid	BSI	2089	47.2	ecoli	1193	NA	NA	22	29	NA	NA	Col(BS512)_1	NA	-	-	-	non-mobilizable	PTU-E47	III	1	NA	NA	NA	2018-08-19	healthcare associated 31-365d	K84016	M	77	PRJNA604975	SAMN18262490
OX-BSI-164_6	3d06adba-9ec1-4fc6-b246-c58eb5569dfe	3d06adba-9ec1-4fc6-b246-c58eb5569dfe_6	Plasmid	BSI	4087	49.77	ecoli	1193	NA	NA	21	29	NA	NA	Col8282_1	NA	MOBQ	-	MOBQ,MOBQ	mobilizable	PTU-E10	III	1	NA	NA	NA	2018-08-19	healthcare associated 31-365d	K84016	M	77	PRJNA604975	SAMN18262490
OX-BSI-165_1	3d06b356-a78a-4561-92dc-389099ebefb3	3d06b356-a78a-4561-92dc-389099ebefb3_chromo	Chromosome	BSI	5106185	50.53	ecoli	73	NA	NA	NA	NA	blaEC-5	IS1203,IS200C,IS30,IS629,IS630,IS682,ISEc13,ISEc16,ISEc20,ISEc39,ISEc41,ISEc42,ISEc45,ISSfl8	NA	acn-BAC0003,acrA-BAC0005,acrD/yffA-BAC0008,acrE/envC-BAC0009,acrF/envD-BAC0010,actP/yjcG-BAC0564,arsC-BAC0582,arsC-BAC0583,asr-BAC0038,baeS-BAC0040,bfrA-BAC0048,bhsA/ycfR/comC-BAC0049,comR/ycfQ-BAC0076,copA-BAC0725,corA-BAC0086,corD-BAC0644,cpxA-BAC0532,cueO-BAC0103,cueR/ybbI-BAC0105,cusA/ybdE-BAC0107,cusB-BAC0108,cusC/ylcB-BAC0109,cusF/cusX-BAC0110,cusR/ylcA-BAC0111,cusS-BAC0112,cutA-BAC0113,cut…	NA	NA	NA	NA	NA	NA	NA	NA	NA	NA	2018-11-11	community	K84023	M	52	PRJNA604975	NA
OX-BSI-166_1	3d630dbb-9d4c-4c50-b89d-f313e5f4311b	3d630dbb-9d4c-4c50-b89d-f313e5f4311b_chromo	Chromosome	BSI	5370003	50.5	ecoli	14	NA	NA	NA	NA	aph(3'')-Ib,aph(6)-Id,blaEC-5,blaTEM-1,dfrA7,qacEdelta1,sul1,sul2	IS100kyp,IS1203,IS1397,IS21,IS30,IS609,IS621,IS911,ISEc10,ISEc13,ISEc16,ISEc20,ISEc21,ISEc42,ISEcl3	NA	acn-BAC0003,acrA-BAC0005,acrD/yffA-BAC0008,acrE/envC-BAC0009,actP/yjcG-BAC0564,arsC-BAC0582,arsC-BAC0583,asr-BAC0038,baeS-BAC0040,bfrA-BAC0048,bhsA/ycfR/comC-BAC0049,comR/ycfQ-BAC0076,copA-BAC0725,copS-BAC0752,corA-BAC0086,corB-BAC0643,corD-BAC0644,cpxA-BAC0532,cueO-BAC0103,cueR/ybbI-BAC0105,cusA/ybdE-BAC0107,cusB-BAC0108,cusC/ylcB-BAC0109,cusF/cusX-BAC0110,cusR/ylcA-BAC0111,cusS-BAC0112,cutA-BAC…	NA	NA	NA	NA	NA	NA	NA	NA	NA	NA	2009-02-19	healthcare associated 0-30d	K81070	F	46	PRJNA604975	SAMN18262483
OX-BSI-167_2	3e0c61cb-7e60-4704-bd5b-fa5e3764be5e	3e0c61cb-7e60-4704-bd5b-fa5e3764be5e_2	Plasmid	BSI	131328	52.73	kpneumoniae	490	212	2	13	41	aac(3)-IIe,aac(6')-Ib-cr5,aph(3'')-Ib,aph(6)-Id,blaCTX-M-15,blaOXA-1,blaTEM-1,catB3,dfrA14,qnrB1,sul2,tet(A)	IS102,IS5075,IS6100,ISEc9,ISKpn11,Tn5403	IncFII_1_pKP91	blt-BAC0050	MOBF,MOBF	MPF_F	-	conjugative	PTU-FK	III	1	NA	NA	NA	2013-07-02	healthcare associated 0-30d	M84025	F	69	PRJNA604975	NA
OX-BSI-167_3	3e0c61cb-7e60-4704-bd5b-fa5e3764be5e	3e0c61cb-7e60-4704-bd5b-fa5e3764be5e_3	Plasmid	BSI	15409	45.55	kpneumoniae	490	3	19	20	32	NA	IS102,IS1X4,ISSen4	IncFIA(HI1)_1_HI1	NA	-	-	MOBF	mobilizable	-	-	1	NA	NA	NA	2013-07-02	healthcare associated 0-30d	M84025	F	69	PRJNA604975	NA
OX-BSI-167_4	3e0c61cb-7e60-4704-bd5b-fa5e3764be5e	3e0c61cb-7e60-4704-bd5b-fa5e3764be5e_4	Plasmid	BSI	9553	51.74	kpneumoniae	490	5	32	18	34	NA	Tn5403	NA	NA	MOBP	-	-	mobilizable	-	-	1	NA	NA	NA	2013-07-02	healthcare associated 0-30d	M84025	F	69	PRJNA604975	NA
OX-BSI-167_1	3e0c61cb-7e60-4704-bd5b-fa5e3764be5e	3e0c61cb-7e60-4704-bd5b-fa5e3764be5e_chromo	Chromosome	BSI	5376645	57.38	kpneumoniae	490	NA	NA	NA	NA	blaSHV-1,fosA,oqxA,oqxB	Tn5403	NA	acn-BAC0003,acrA-BAC0005,acrB-BAC0006,acrC-BAC0007,acrD-BAC0563,acrE/envC-BAC0009,acrF/envD-BAC0010,actP/yjcG-BAC0564,adeE-BAC0013,arsB-BAC0578,arsC-BAC0582,arsC-BAC0583,arsR-BAC0589,baeR-BAC0596,baeS-BAC0040,bepG-BAC0046,bfrA-BAC0048,bhsA/ycfR/comC-BAC0049,cepA-BAC0061,comR/ycfQ-BAC0076,copA-BAC0725,corA-BAC0086,corB-BAC0643,corD-BAC0644,corR-BAC0089,cpxA-BAC0532,cueR/ybbI-BAC0105,cusA/ybdE-BAC0…	NA	NA	NA	NA	NA	NA	NA	NA	NA	NA	2013-07-02	healthcare associated 0-30d	M84025	F	69	PRJNA604975	NA
OX-BSI-168_1	3e2f6d51-5500-4dab-a429-476ee572df97	3e2f6d51-5500-4dab-a429-476ee572df97_chromo	Chromosome	BSI	5070799	50.45	ecoli	12	NA	NA	NA	NA	NA	IS1203,IS1F,IS621,IS682,ISEc20,ISEc31,ISEc38,ISEc41,ISEc42,ISEc48,ISEc8,ISSd1,ISSen4	NA	acn-BAC0003,acrA-BAC0005,acrD/yffA-BAC0008,acrE/envC-BAC0009,acrF/envD-BAC0010,actP/yjcG-BAC0564,arsC-BAC0582,arsC-BAC0583,asr-BAC0038,baeS-BAC0040,bfrA-BAC0048,bhsA/ycfR/comC-BAC0049,comR/ycfQ-BAC0076,copA-BAC0725,copS-BAC0752,corA-BAC0086,corB-BAC0643,corD-BAC0644,cpxA-BAC0532,cueO-BAC0103,cueR/ybbI-BAC0105,cusA/ybdE-BAC0107,cusB-BAC0108,cusC/ylcB-BAC0109,cusF/cusX-BAC0110,cusR/ylcA-BAC0111,cus…	NA	NA	NA	NA	NA	NA	NA	NA	NA	NA	2018-05-15	healthcare associated 31-365d	K84025	F	92	PRJNA604975	SAMN18262476
OX-BSI-168_2	3e2f6d51-5500-4dab-a429-476ee572df97	3e2f6d51-5500-4dab-a429-476ee572df97_2	Plasmid	BSI	114242	51.02	ecoli	12	NA	NA	1	123	NA	IS100kyp,IS21,IS26,ISEc10,ISEc53	Col156_1,IncFIB(AP001918)_1,IncFII(29)_1_pUTI89	NA	MOBF,MOBP	MPF_F	MOBF	conjugative	PTU-FE	III	1	NA	NA	NA	2018-05-15	healthcare associated 31-365d	K84025	F	92	PRJNA604975	SAMN18262476
OX-BSI-169_3	3e5ce2df-15f9-4f24-8849-a6afe6533f83	3e5ce2df-15f9-4f24-8849-a6afe6533f83_3	Plasmid	BSI	5742	45.82	kpneumoniae	39	NA	NA	NA	NA	NA	IS1X2	Col440I_1	NA	-	-	-	non-mobilizable	-	-	1	NA	NA	NA	2018-10-11	nosocomial	G82122	F	31	PRJNA604975	NA
OX-BSI-169_4	3e5ce2df-15f9-4f24-8849-a6afe6533f83	3e5ce2df-15f9-4f24-8849-a6afe6533f83_4	Plasmid	BSI	4401	34.15	kpneumoniae	39	NA	NA	NA	NA	NA	NA	NA	NA	-	-	-	non-mobilizable	-	-	1	NA	NA	NA	2018-10-11	nosocomial	G82122	F	31	PRJNA604975	NA
OX-BSI-169_5	3e5ce2df-15f9-4f24-8849-a6afe6533f83	3e5ce2df-15f9-4f24-8849-a6afe6533f83_5	Plasmid	BSI	3732	32.48	kpneumoniae	39	NA	NA	NA	NA	NA	NA	NA	NA	-	-	-	non-mobilizable	-	-	1	NA	NA	NA	2018-10-11	nosocomial	G82122	F	31	PRJNA604975	NA
OX-BSI-169_6	3e5ce2df-15f9-4f24-8849-a6afe6533f83	3e5ce2df-15f9-4f24-8849-a6afe6533f83_6	Plasmid	BSI	3727	31.82	kpneumoniae	39	NA	NA	NA	NA	NA	NA	NA	NA	-	-	-	non-mobilizable	-	-	1	NA	NA	NA	2018-10-11	nosocomial	G82122	F	31	PRJNA604975	NA
OX-BSI-169_1	3e5ce2df-15f9-4f24-8849-a6afe6533f83	3e5ce2df-15f9-4f24-8849-a6afe6533f83_chromo	Chromosome	BSI	5347674	57.47	kpneumoniae	39	NA	NA	NA	NA	blaSHV-1,fosA,oqxA,oqxB32	IS1400,IS1X2,ISKpn28,ISSen4,ISSty2	NA	acn-BAC0003,acrA-BAC0005,acrB-BAC0006,acrC-BAC0007,acrD-BAC0563,acrE/envC-BAC0009,acrF/envD-BAC0010,actP/yjcG-BAC0564,adeE-BAC0013,arsB-BAC0578,arsC-BAC0582,arsC-BAC0583,arsR-BAC0589,baeR-BAC0596,baeS-BAC0040,bepG-BAC0046,bfrA-BAC0048,bhsA/ycfR/comC-BAC0049,cepA-BAC0061,chrA-BAC0026,chrB-BAC0027,comR/ycfQ-BAC0076,copA-BAC0725,corA-BAC0086,corB-BAC0643,corD-BAC0644,cpxA-BAC0532,cueR/ybbI-BAC0105,c…	NA	NA	NA	NA	NA	NA	NA	NA	NA	NA	2018-10-11	nosocomial	G82122	F	31	PRJNA604975	NA
OX-BSI-169_2	3e5ce2df-15f9-4f24-8849-a6afe6533f83	3e5ce2df-15f9-4f24-8849-a6afe6533f83_2	Plasmid	BSI	229557	53.94	kpneumoniae	39	NA	NA	16	37	aac(3)-IIe,aadA1,blaSCO-1,blaSHV-1,blaTEM-1,catA1,dfrA8,qacEdelta1,sul1	IS1326,IS1F,IS1R,IS1X3,ISEc36,ISEc8,ISEcl1,ISKpn11,ISKpn12,ISKpn26,ISKpn28	IncFIB(K)_1_Kpn3	arsA-BAC0571,arsC-BAC0582,arsC-BAC0584,arsR-BAC0589,arsR-BAC0591,copG-BAC0717,fecE-BAC0164,merA-BAC0652,merC-BAC0664,merD-BAC0666,merE-BAC0672,merP-BAC0678,merR-BAC0689,merT-BAC0233,nikB-BAC0271,nikC-BAC0272,nikD-BAC0273,pcoA-BAC0303,pcoB-BAC0304,pcoC-BAC0305,pcoD-BAC0306,pcoE-BAC0307,pcoR-BAC0308,pcoS-BAC0309,qacEdelta1-BAC0323,silA-BAC0341,silB-BAC0342,silC-BAC0343,silE-BAC0344,silF-BAC0345,sil…	MOBF,MOBF	MPF_T	-	conjugative	PTU-FK	III	0.9766	NA	NA	NA	2018-10-11	nosocomial	G82122	F	31	PRJNA604975	NA
OX-BSI-170_2	3e6aae4c-c337-48b5-8679-612e8b7e9d49	3e6aae4c-c337-48b5-8679-612e8b7e9d49_2	Plasmid	BSI	177785	51.69	kpneumoniae	45	NA	NA	NA	NA	aadA2,aph(3'')-Ib,aph(6)-Id,blaLAP-2,dfrA12,qacEdelta1,qnrS1,sul1,sul2,tet(A)	IS10L,IS2,ISKpn19,ISKpn24,ISVsa3	IncFIB(K)_1_Kpn3,IncFII_1_pKP91	arsA-BAC0571,arsA-BAC0572,arsB-BAC0578,arsC-BAC0584,arsH-BAC0034,arsR-BAC0589,blt-BAC0050,copG-BAC0717,pcoA-BAC0303,pcoB-BAC0304,pcoC-BAC0305,pcoD-BAC0306,pcoE-BAC0307,pcoR-BAC0308,pcoS-BAC0309,qacEdelta1-BAC0323,silA-BAC0341,silB-BAC0342,silC-BAC0343,silE-BAC0344,silF-BAC0345,silP-BAC0346,silR-BAC0347,silS-BAC0348	MOBF,MOBF	MPF_F	-	conjugative	-	-	1	NA	NA	NA	2017-03-24	nosocomial	K84060	F	42	PRJNA604975	NA
OX-BSI-170_3	3e6aae4c-c337-48b5-8679-612e8b7e9d49	3e6aae4c-c337-48b5-8679-612e8b7e9d49_3	Plasmid	BSI	63589	51.22	kpneumoniae	45	8	7	84	7	blaOXA-48	NA	IncL/M(pOXA-48)_1_pOXA-48	adeL-BAC0508	MOBP	MPF_I	-	conjugative	PTU-L/M	IV	1	NA	NA	NA	2017-03-24	nosocomial	K84060	F	42	PRJNA604975	NA
OX-BSI-170_4	3e6aae4c-c337-48b5-8679-612e8b7e9d49	3e6aae4c-c337-48b5-8679-612e8b7e9d49_4	Plasmid	BSI	3712	50.05	kpneumoniae	45	NA	NA	NA	NA	NA	NA	NA	NA	MOBP	-	-	mobilizable	-	-	1	NA	NA	NA	2017-03-24	nosocomial	K84060	F	42	PRJNA604975	NA
OX-BSI-170_6	3e6aae4c-c337-48b5-8679-612e8b7e9d49	3e6aae4c-c337-48b5-8679-612e8b7e9d49_6	Plasmid	BSI	2317	49.24	kpneumoniae	45	NA	NA	NA	NA	NA	NA	Col440I_1	NA	-	-	MOB_unknown	mobilizable	PTU-E76	III	1	NA	NA	NA	2017-03-24	nosocomial	K84060	F	42	PRJNA604975	NA
OX-BSI-170_1	3e6aae4c-c337-48b5-8679-612e8b7e9d49	3e6aae4c-c337-48b5-8679-612e8b7e9d49_chromo	Chromosome	BSI	5324305	57.43	kpneumoniae	45	NA	NA	NA	NA	blaSHV-1,fosA,oqxA11,oqxB19	NA	NA	acn-BAC0003,acrA-BAC0005,acrB-BAC0006,acrC-BAC0007,acrD-BAC0563,acrE/envC-BAC0009,acrF/envD-BAC0010,actP/yjcG-BAC0564,adeE-BAC0013,arsB-BAC0578,arsC-BAC0582,arsC-BAC0583,arsR-BAC0589,baeR-BAC0596,baeS-BAC0040,bepG-BAC0046,bfrA-BAC0048,bhsA/ycfR/comC-BAC0049,cepA-BAC0061,chrA-BAC0026,chrB-BAC0027,comR/ycfQ-BAC0076,copA-BAC0725,corA-BAC0086,corB-BAC0643,corD-BAC0644,corR-BAC0089,cpxA-BAC0532,cueR/y…	NA	NA	NA	NA	NA	NA	NA	NA	NA	NA	2017-03-24	nosocomial	K84060	F	42	PRJNA604975	NA
OX-BSI-170_5	3e6aae4c-c337-48b5-8679-612e8b7e9d49	3e6aae4c-c337-48b5-8679-612e8b7e9d49_5	Plasmid	BSI	3223	56.35	kpneumoniae	45	NA	NA	62	10	NA	NA	Col440II_1,ColRNAI_1	emrE/mvrC-BAC0150	MOBP,MOBP	-	MOB_unknown	mobilizable	PTU-E3	V	0.8023	NA	NA	NA	2017-03-24	nosocomial	K84060	F	42	PRJNA604975	NA
OX-BSI-171_1	3eaabda1-37f7-45d5-a3a8-b0f3ada575e0	3eaabda1-37f7-45d5-a3a8-b0f3ada575e0_chromo	Chromosome	BSI	5252099	50.46	ecoli	73	NA	NA	NA	NA	blaEC-5	IS100kyp,IS1203,IS1F,IS200C,IS30,IS629,IS630,IS682,ISEc10,ISEc13,ISEc16,ISEc17,ISEc20,ISEc21,ISEc31,ISEc39,ISEc41,ISEc42,ISEc48	NA	acn-BAC0003,acrA-BAC0005,acrD/yffA-BAC0008,acrE/envC-BAC0009,acrF/envD-BAC0010,actP/yjcG-BAC0564,arsC-BAC0582,arsC-BAC0583,asr-BAC0038,baeS-BAC0040,bfrA-BAC0048,bhsA/ycfR/comC-BAC0049,comR/ycfQ-BAC0076,copA-BAC0725,corA-BAC0086,corB-BAC0643,corD-BAC0644,cpxA-BAC0532,cueO-BAC0103,cueR/ybbI-BAC0105,cusA/ybdE-BAC0107,cusB-BAC0108,cusC/ylcB-BAC0109,cusF/cusX-BAC0110,cusR/ylcA-BAC0111,cusS-BAC0112,cut…	NA	NA	NA	NA	NA	NA	NA	NA	NA	NA	2018-05-31	healthcare associated 0-30d	K84033	F	67	PRJNA604975	SAMN18257844
OX-BSI-171_2	3eaabda1-37f7-45d5-a3a8-b0f3ada575e0	3eaabda1-37f7-45d5-a3a8-b0f3ada575e0_2	Plasmid	BSI	1552	51.8	ecoli	73	9	5	6	62	NA	NA	Col(MG828)_1	NA	-	-	MOB_unknown	mobilizable	PTU-E9	VI	1	NA	NA	NA	2018-05-31	healthcare associated 0-30d	K84033	F	67	PRJNA604975	SAMN18257844
OX-BSI-172_1	3f6f3b37-4c3a-48ae-b713-1ef49a118d29	3f6f3b37-4c3a-48ae-b713-1ef49a118d29_chromo	Chromosome	BSI	5037268	50.49	ecoli	2558	NA	NA	NA	NA	NA	IS100kyp,IS1203,IS621,IS682,ISEc16,ISEc38,ISEc40,ISEc42,ISEc48,ISEc8,ISSaen1	NA	acn-BAC0003,acrA-BAC0005,acrB-BAC0006,acrD/yffA-BAC0008,acrE/envC-BAC0009,acrF/envD-BAC0010,actP/yjcG-BAC0564,adeE-BAC0013,arsC-BAC0582,arsC-BAC0583,asr-BAC0038,baeS-BAC0040,bfrA-BAC0048,bhsA/ycfR/comC-BAC0049,comR/ycfQ-BAC0076,copA-BAC0725,copS-BAC0752,corA-BAC0086,corB-BAC0643,corD-BAC0644,cpxA-BAC0532,cueO-BAC0103,cueR/ybbI-BAC0105,cusA/ybdE-BAC0107,cusB-BAC0108,cusC/ylcB-BAC0109,cusF/cusX-BAC…	NA	NA	NA	NA	NA	NA	NA	NA	NA	NA	2009-11-29	healthcare associated 31-365d	K84059	M	62	PRJNA604975	SAMN18257833
OX-BSI-173_1	40d4b705-b010-4cc0-aa8b-30a9eec80e08	40d4b705-b010-4cc0-aa8b-30a9eec80e08_chromo	Chromosome	BSI	5108400	50.53	ecoli	95	NA	NA	NA	NA	NA	IS1203,IS1397,IS1A,IS2,IS200C,IS3,IS621,ISEc1,ISEc20,ISEc38,ISEc40,ISEc48	NA	acn-BAC0003,acrA-BAC0005,acrB-BAC0006,acrD/yffA-BAC0008,acrE/envC-BAC0009,actP/yjcG-BAC0564,arsC-BAC0582,arsC-BAC0583,asr-BAC0038,baeS-BAC0040,bfrA-BAC0048,bhsA/ycfR/comC-BAC0049,comR/ycfQ-BAC0076,copA-BAC0725,corA-BAC0086,corB-BAC0643,corD-BAC0644,cpxA-BAC0532,cueO-BAC0103,cueR/ybbI-BAC0105,cusA/ybdE-BAC0107,cusB-BAC0108,cusC/ylcB-BAC0109,cusF/cusX-BAC0110,cusR/ylcA-BAC0111,cusS-BAC0112,cutA-BAC…	NA	NA	NA	NA	NA	NA	NA	NA	NA	NA	2018-11-17	community	K83031	M	83	PRJNA604975	SAMN18257827
OX-BSI-173_2	40d4b705-b010-4cc0-aa8b-30a9eec80e08	40d4b705-b010-4cc0-aa8b-30a9eec80e08_2	Plasmid	BSI	174499	49.93	ecoli	95	NA	NA	2	100	NA	IS100kyp,IS1X4,IS2,IS30	IncFIB(AP001918)_1,IncFIC(FII)_1	fecD-BAC0163,fecE-BAC0164,sitA-BAC0349,sitB-BAC0350,sitC-BAC0351,sitD-BAC0352,tupC-BAC0607	MOBF	MPF_F	MOBF	conjugative	PTU-FE	III	0.9941	NA	NA	NA	2018-11-17	community	K83031	M	83	PRJNA604975	SAMN18257827
OX-BSI-174_2	40fa8cb1-b107-4aaf-8121-379e61a73316	40fa8cb1-b107-4aaf-8121-379e61a73316_2	Plasmid	BSI	114250	51.02	ecoli	73	NA	NA	1	123	NA	IS100kyp,IS21,IS26,ISEc10,ISEc53	Col156_1,IncFIB(AP001918)_1,IncFII(29)_1_pUTI89	NA	MOBF,MOBP	MPF_F	MOBF	conjugative	PTU-FE	III	1	NA	NA	NA	2014-08-11	healthcare associated 0-30d	K84007	M	89	PRJNA604975	NA
OX-BSI-174_3	40fa8cb1-b107-4aaf-8121-379e61a73316	40fa8cb1-b107-4aaf-8121-379e61a73316_3	Plasmid	BSI	5631	47.38	ecoli	73	NA	NA	11	43	NA	NA	ColRNAI_1	NA	MOBP,MOBP	-	MOBP	mobilizable	PTU-E22	I	1	NA	NA	NA	2014-08-11	healthcare associated 0-30d	K84007	M	89	PRJNA604975	NA
OX-BSI-174_1	40fa8cb1-b107-4aaf-8121-379e61a73316	40fa8cb1-b107-4aaf-8121-379e61a73316_chromo	Chromosome	BSI	4989396	50.61	ecoli	73	NA	NA	NA	NA	blaEC-5	IS1203,IS1F,IS30,IS630,ISEc20,ISEc39,ISEc40,ISEc41,ISEc42,ISEc45,ISEc52,ISEc8,ISSd1	NA	acn-BAC0003,acrA-BAC0005,acrD/yffA-BAC0008,acrE/envC-BAC0009,acrF/envD-BAC0010,actP/yjcG-BAC0564,arsC-BAC0582,arsC-BAC0583,asr-BAC0038,baeS-BAC0040,bfrA-BAC0048,bhsA/ycfR/comC-BAC0049,comR/ycfQ-BAC0076,copA-BAC0725,corA-BAC0086,corB-BAC0643,corD-BAC0644,cpxA-BAC0532,cueO-BAC0103,cueR/ybbI-BAC0105,cusA/ybdE-BAC0107,cusB-BAC0108,cusC/ylcB-BAC0109,cusF/cusX-BAC0110,cusR/ylcA-BAC0111,cusS-BAC0112,cut…	NA	NA	NA	NA	NA	NA	NA	NA	NA	NA	2014-08-11	healthcare associated 0-30d	K84007	M	89	PRJNA604975	NA
OX-BSI-175_2	41a7b807-109e-4da3-9e3e-5604a363f11c	41a7b807-109e-4da3-9e3e-5604a363f11c_2	Plasmid	BSI	185807	53.78	kpneumoniae	1423	NA	NA	NA	NA	NA	IS26,IS903,ISEc21,ISEcl1,ISEhe3,ISKpn26	IncFIB(K)_1_Kpn3,IncFII_1_pKP91	arsA-BAC0571,arsB-BAC0577,arsB-BAC0578,arsD-BAC0587,arsH-BAC0034,arsR-BAC0588,arsR-BAC0589,cepA-BAC0061,copG-BAC0717,nikB-BAC0271,nikC-BAC0272,nikD-BAC0273,pcoA-BAC0303,pcoB-BAC0304,pcoC-BAC0305,pcoD-BAC0306,pcoE-BAC0307,pcoR-BAC0308,pcoS-BAC0309,pstB-BAC0316,silA-BAC0341,silB-BAC0342,silC-BAC0343,silE-BAC0344,silF-BAC0345,silP-BAC0346,silR-BAC0347,silS-BAC0348,yfeB-BAC0440	-	-	-	non-mobilizable	-	-	1	NA	NA	NA	2009-08-16	nosocomial	K84056	M	63	PRJNA604975	NA
OX-BSI-175_3	41a7b807-109e-4da3-9e3e-5604a363f11c	41a7b807-109e-4da3-9e3e-5604a363f11c_3	Plasmid	BSI	119907	53.16	kpneumoniae	1423	NA	NA	NA	NA	NA	IS26,IS4321R	IncFII_1_pKP91	chrA-BAC0026,chrB-BAC0027,ncrA-BAC0263,ncrB-BAC0264,ncrC-BAC0265,ncrY-BAC0266	MOBF,MOBF	MPF_F	-	conjugative	PTU-E42	I	0.9091	NA	NA	NA	2009-08-16	nosocomial	K84056	M	63	PRJNA604975	NA
OX-BSI-175_4	41a7b807-109e-4da3-9e3e-5604a363f11c	41a7b807-109e-4da3-9e3e-5604a363f11c_4	Plasmid	BSI	100048	50.33	kpneumoniae	1423	NA	NA	NA	NA	NA	IS1B,IS5075,ISKpn21,ISSpr2	IncFII(p14)_1_p14	NA	MOBF	MPF_F	-	conjugative	-	-	1	NA	NA	NA	2009-08-16	nosocomial	K84056	M	63	PRJNA604975	NA
OX-BSI-175_5	41a7b807-109e-4da3-9e3e-5604a363f11c	41a7b807-109e-4da3-9e3e-5604a363f11c_5	Plasmid	BSI	4370	48.47	kpneumoniae	1423	NA	NA	NA	NA	NA	NA	Col440I_1	NA	-	-	-	non-mobilizable	-	-	1	NA	NA	NA	2009-08-16	nosocomial	K84056	M	63	PRJNA604975	NA
OX-BSI-175_1	41a7b807-109e-4da3-9e3e-5604a363f11c	41a7b807-109e-4da3-9e3e-5604a363f11c_chromo	Chromosome	BSI	5350626	57.58	kpneumoniae	1423	NA	NA	NA	NA	blaLEN,fosA,oqxA,oqxB15	IS2,ISEc14	NA	acn-BAC0003,acrA-BAC0005,acrC-BAC0007,acrD-BAC0563,acrE/envC-BAC0009,acrF/envD-BAC0010,arsB-BAC0578,arsC-BAC0582,arsC-BAC0583,arsR-BAC0589,baeS-BAC0040,bepG-BAC0046,bfrA-BAC0048,bhsA/ycfR/comC-BAC0049,chrA-BAC0026,chrB-BAC0027,comR/ycfQ-BAC0076,copA-BAC0725,corA-BAC0086,corB-BAC0643,corD-BAC0644,corR-BAC0089,cpxA-BAC0532,cueR/ybbI-BAC0105,cusA/ybdE-BAC0107,cusB-BAC0108,cusC/ylcB-BAC0109,cusF/cusX…	NA	NA	NA	NA	NA	NA	NA	NA	NA	NA	2009-08-16	nosocomial	K84056	M	63	PRJNA604975	NA
OX-BSI-176_1	41ec76b0-af9b-4caa-89e6-673e8072724b	41ec76b0-af9b-4caa-89e6-673e8072724b_chromo	Chromosome	BSI	4925428	50.66	ecoli	95	NA	NA	NA	NA	NA	IS1203,IS1397,IS150,IS1F,IS200C,IS609,IS621,ISEc12,ISEc30,ISEc38,ISEc48,ISEc8,ISSd1	NA	acn-BAC0003,acrA-BAC0005,acrD/yffA-BAC0008,acrE/envC-BAC0009,acrF/envD-BAC0010,actP/yjcG-BAC0564,arsC-BAC0582,arsC-BAC0583,asr-BAC0038,baeS-BAC0040,bfrA-BAC0048,bhsA/ycfR/comC-BAC0049,comR/ycfQ-BAC0076,copA-BAC0725,corA-BAC0086,corB-BAC0643,corD-BAC0644,cpxA-BAC0532,cueO-BAC0103,cueR/ybbI-BAC0105,cusA/ybdE-BAC0107,cusB-BAC0108,cusC/ylcB-BAC0109,cusF/cusX-BAC0110,cusR/ylcA-BAC0111,cusS-BAC0112,cut…	NA	NA	NA	NA	NA	NA	NA	NA	NA	NA	2009-01-05	healthcare associated 0-30d	K83018	M	72	PRJNA604975	SAMN18257816
OX-BSI-176_4	41ec76b0-af9b-4caa-89e6-673e8072724b	41ec76b0-af9b-4caa-89e6-673e8072724b_4	Plasmid	BSI	1549	51.07	ecoli	95	NA	NA	8	57	NA	NA	Col(MG828)_1	NA	-	-	MOB_unknown,MOBP	mobilizable	PTU-E9	VI	1	NA	NA	NA	2009-01-05	healthcare associated 0-30d	K83018	M	72	PRJNA604975	SAMN18257816
OX-BSI-176_3	41ec76b0-af9b-4caa-89e6-673e8072724b	41ec76b0-af9b-4caa-89e6-673e8072724b_3	Plasmid	BSI	93603	52.08	ecoli	95	NA	NA	NA	NA	NA	NA	IncB/O/K/Z_3	NA	MOBP	MPF_I	MOBP	conjugative	PTU-B/O/K/Z	III	1	NA	NA	NA	2009-01-05	healthcare associated 0-30d	K83018	M	72	PRJNA604975	SAMN18257816
OX-BSI-176_2	41ec76b0-af9b-4caa-89e6-673e8072724b	41ec76b0-af9b-4caa-89e6-673e8072724b_2	Plasmid	BSI	144048	49.63	ecoli	95	NA	NA	2	100	blaTEM-1	IS2,IS629,ISEc32,Tn3	IncFIB(AP001918)_1,IncFII_1	sitA-BAC0349,sitB-BAC0350,sitC-BAC0351,sitD-BAC0352,smdB-BAC0354,tupC-BAC0607	MOBF	MPF_F	MOBF	conjugative	PTU-FE	III	0.994	NA	NA	NA	2009-01-05	healthcare associated 0-30d	K83018	M	72	PRJNA604975	SAMN18257816
OX-BSI-177_2	424da611-5e94-408a-b4e6-19050f819a67	424da611-5e94-408a-b4e6-19050f819a67_2	Plasmid	BSI	203766	50.8	kpneumoniae	490	NA	NA	19	33	NA	IS1A,IS1X4,IS5075,IS903,ISEc36,ISKox1,ISKpn2,ISKpn21,ISKpn24,ISSen3	IncFIB(K)_1_Kpn3	copG-BAC0717,pcoA-BAC0303,pcoB-BAC0304,pcoC-BAC0305,pcoD-BAC0306,pcoE-BAC0307,pcoR-BAC0308,pcoS-BAC0309,pstB-BAC0316,silA-BAC0341,silB-BAC0342,silC-BAC0343,silE-BAC0344,silF-BAC0345,silP-BAC0346,silR-BAC0347,silS-BAC0348	-	-	-	non-mobilizable	PTU-E35	I	0.75	NA	NA	NA	2009-05-07	healthcare associated 31-365d	K84025	F	93	PRJNA604975	NA
OX-BSI-177_3	424da611-5e94-408a-b4e6-19050f819a67	424da611-5e94-408a-b4e6-19050f819a67_3	Plasmid	BSI	131877	52.73	kpneumoniae	490	10	5	13	41	aac(3)-IIe,aac(6')-Ib-cr5,aph(3'')-Ib,aph(6)-Id,blaCTX-M-15,blaOXA-1,blaTEM-1,catB3,dfrA14,qnrB1,sul2,tet(A)	IS102,IS5075,IS6100,ISEc9,ISKpn11,Tn5403	IncFII_1_pKP91	blt-BAC0050	MOBF,MOBF	MPF_F	-	conjugative	PTU-FK	III	1	NA	NA	NA	2009-05-07	healthcare associated 31-365d	K84025	F	93	PRJNA604975	NA
OX-BSI-177_4	424da611-5e94-408a-b4e6-19050f819a67	424da611-5e94-408a-b4e6-19050f819a67_4	Plasmid	BSI	15409	45.55	kpneumoniae	490	3	19	20	32	NA	IS102,IS1X4,ISSen4	IncFIA(HI1)_1_HI1	NA	-	-	MOBF	mobilizable	-	-	1	NA	NA	NA	2009-05-07	healthcare associated 31-365d	K84025	F	93	PRJNA604975	NA
OX-BSI-177_5	424da611-5e94-408a-b4e6-19050f819a67	424da611-5e94-408a-b4e6-19050f819a67_5	Plasmid	BSI	9553	51.74	kpneumoniae	490	5	32	18	34	NA	Tn5403	NA	NA	MOBP	-	-	mobilizable	-	-	1	NA	NA	NA	2009-05-07	healthcare associated 31-365d	K84025	F	93	PRJNA604975	NA
OX-BSI-177_6	424da611-5e94-408a-b4e6-19050f819a67	424da611-5e94-408a-b4e6-19050f819a67_6	Plasmid	BSI	3515	54.4	kpneumoniae	490	NA	NA	53	11	NA	NA	Col440I_1,Col440II_1	NA	MOBP,MOBP	-	MOBP	mobilizable	PTU-E3	V	0.6842	NA	NA	NA	2009-05-07	healthcare associated 31-365d	K84025	F	93	PRJNA604975	NA
OX-BSI-177_7	424da611-5e94-408a-b4e6-19050f819a67	424da611-5e94-408a-b4e6-19050f819a67_7	Plasmid	BSI	3335	46.39	kpneumoniae	490	196	2	88	7	NA	NA	ColRNAI_1	NA	-	-	-	non-mobilizable	PTU-?	II	0.6	NA	NA	NA	2009-05-07	healthcare associated 31-365d	K84025	F	93	PRJNA604975	NA
OX-BSI-177_8	424da611-5e94-408a-b4e6-19050f819a67	424da611-5e94-408a-b4e6-19050f819a67_8	Plasmid	BSI	2454	48.17	kpneumoniae	490	NA	NA	NA	NA	NA	NA	Col440I_1	NA	-	-	-	non-mobilizable	-	-	1	NA	NA	NA	2009-05-07	healthcare associated 31-365d	K84025	F	93	PRJNA604975	NA
OX-BSI-177_1	424da611-5e94-408a-b4e6-19050f819a67	424da611-5e94-408a-b4e6-19050f819a67_chromo	Chromosome	BSI	5345883	57.5	kpneumoniae	490	NA	NA	NA	NA	blaSHV-1,fosA,oqxA,oqxB	IS5075,ISEc21,ISKpn26,Tn5403	NA	acn-BAC0003,acrA-BAC0005,acrB-BAC0006,acrC-BAC0007,acrE/envC-BAC0009,acrF/envD-BAC0010,actP/yjcG-BAC0564,adeE-BAC0013,arsB-BAC0578,arsC-BAC0582,arsC-BAC0583,arsR-BAC0589,baeR-BAC0596,baeS-BAC0040,bepG-BAC0046,bfrA-BAC0048,bhsA/ycfR/comC-BAC0049,cepA-BAC0061,comR/ycfQ-BAC0076,copA-BAC0725,corA-BAC0086,corB-BAC0643,corD-BAC0644,corR-BAC0089,cpxA-BAC0532,cueR/ybbI-BAC0105,cusA/ybdE-BAC0107,cusB-BAC0…	NA	NA	NA	NA	NA	NA	NA	NA	NA	NA	2009-05-07	healthcare associated 31-365d	K84025	F	93	PRJNA604975	NA
OX-BSI-178_2	42646489-9bb5-439e-afa3-6ea9162c531e	42646489-9bb5-439e-afa3-6ea9162c531e_2	Plasmid	BSI	5463	47.19	ecoli	73	NA	NA	99	6	NA	NA	Col156_1	NA	MOBQ	-	-	mobilizable	PTU-E7	III	1	NA	NA	NA	2009-04-05	community	K84019	M	58	PRJNA604975	SAMN18257811
OX-BSI-178_1	42646489-9bb5-439e-afa3-6ea9162c531e	42646489-9bb5-439e-afa3-6ea9162c531e_chromo	Chromosome	BSI	5129368	50.47	ecoli	73	NA	NA	NA	NA	NA	IS100kyp,IS1F,IS200C,IS630,IS682,ISEc13,ISEc16,ISEc17,ISEc20,ISEc21,ISEc31,ISEc39,ISEc41,ISEc42	NA	acn-BAC0003,acrA-BAC0005,acrD/yffA-BAC0008,acrE/envC-BAC0009,acrF/envD-BAC0010,actP/yjcG-BAC0564,arsC-BAC0582,arsC-BAC0583,asr-BAC0038,baeS-BAC0040,bfrA-BAC0048,bhsA/ycfR/comC-BAC0049,comR/ycfQ-BAC0076,copA-BAC0725,corA-BAC0086,corB-BAC0643,corD-BAC0644,cpxA-BAC0532,cueO-BAC0103,cueR/ybbI-BAC0105,cusA/ybdE-BAC0107,cusB-BAC0108,cusC/ylcB-BAC0109,cusF/cusX-BAC0110,cusR/ylcA-BAC0111,cusS-BAC0112,cut…	NA	NA	NA	NA	NA	NA	NA	NA	NA	NA	2009-04-05	community	K84019	M	58	PRJNA604975	SAMN18257811
OX-BSI-179_1	428c7f91-488a-41c4-8a14-2f6283f07a5f	428c7f91-488a-41c4-8a14-2f6283f07a5f_chromo	Chromosome	BSI	4818084	50.66	ecoli	155	NA	NA	NA	NA	NA	IS1618,IS1H,IS2,IS629,ISEc26,ISEc38	NA	acn-BAC0003,acrA-BAC0005,acrB-BAC0006,acrD/yffA-BAC0008,acrE/envC-BAC0009,acrF/envD-BAC0010,actP/yjcG-BAC0564,arsB-BAC0578,arsC-BAC0583,arsC-BAC0584,arsP-BAC0036,arsR-BAC0594,asr-BAC0038,baeS-BAC0040,bfrA-BAC0048,bhsA/ycfR/comC-BAC0049,comR/ycfQ-BAC0076,copA-BAC0725,corA-BAC0086,corB-BAC0643,corD-BAC0644,cpxA-BAC0532,cueO-BAC0103,cueR/ybbI-BAC0105,cusA/ybdE-BAC0107,cusB-BAC0108,cusC/ylcB-BAC0109,…	NA	NA	NA	NA	NA	NA	NA	NA	NA	NA	2018-06-12	healthcare associated 31-365d	K84025	F	84	PRJNA604975	SAMN18257809
OX-BSI-179_4	428c7f91-488a-41c4-8a14-2f6283f07a5f	428c7f91-488a-41c4-8a14-2f6283f07a5f_4	Plasmid	BSI	34642	41.36	ecoli	155	NA	NA	119	5	NA	NA	IncX4_2	triA-BAC0396,triC-BAC0398	MOBP	MPF_T	-	conjugative	PTU-X4	III	1	NA	NA	NA	2018-06-12	healthcare associated 31-365d	K84025	F	84	PRJNA604975	SAMN18257809
OX-BSI-179_2	428c7f91-488a-41c4-8a14-2f6283f07a5f	428c7f91-488a-41c4-8a14-2f6283f07a5f_2	Plasmid	BSI	110201	51.07	ecoli	155	NA	NA	3	73	blaCTX-M-1,sul2,tet(A)	IS26,ISCro1,ISEc9,ISSbo1,ISVsa3	IncI1_1_Alpha	blt-BAC0050,pmrG-BAC0486	MOBP	MPF_I	MOBP	conjugative	PTU-I1	III	1	NA	NA	NA	2018-06-12	healthcare associated 31-365d	K84025	F	84	PRJNA604975	SAMN18257809
OX-BSI-179_3	428c7f91-488a-41c4-8a14-2f6283f07a5f	428c7f91-488a-41c4-8a14-2f6283f07a5f_3	Plasmid	BSI	99129	48.76	ecoli	155	NA	NA	NA	NA	NA	IS200C,ISEc17,ISEc8	IncFIB(AP001918)_1	NA	MOBF	MPF_F	MOBF	conjugative	PTU-FE	III	0.9941	NA	NA	NA	2018-06-12	healthcare associated 31-365d	K84025	F	84	PRJNA604975	SAMN18257809
OX-BSI-180_6	429e9986-8105-40e1-bcac-7f92bc460949	429e9986-8105-40e1-bcac-7f92bc460949_6	Plasmid	BSI	4241	45.13	ecoli	73	NA	NA	NA	NA	NA	NA	ColRNAI_1	NA	-	-	-	non-mobilizable	-	-	1	NA	NA	NA	2009-11-17	healthcare associated 31-365d	K84032	F	90	PRJNA604975	SAMN18257808
OX-BSI-180_4	429e9986-8105-40e1-bcac-7f92bc460949	429e9986-8105-40e1-bcac-7f92bc460949_4	Plasmid	BSI	5873	47.51	ecoli	73	NA	NA	11	43	NA	NA	ColRNAI_1	NA	MOBP,MOBP	-	MOBP	mobilizable	PTU-E22	I	1	NA	NA	NA	2009-11-17	healthcare associated 31-365d	K84032	F	90	PRJNA604975	SAMN18257808
OX-BSI-180_1	429e9986-8105-40e1-bcac-7f92bc460949	429e9986-8105-40e1-bcac-7f92bc460949_chromo	Chromosome	BSI	5015729	50.56	ecoli	73	NA	NA	NA	NA	blaEC-5	IS100kyp,IS1203,IS2,IS200C,IS4,IS630,ISCro1,ISEc13,ISEc16,ISEc20,ISEc22,ISEc39,ISEc40,ISEc41,ISEc42,ISEc43,ISEc49,ISSd1,ISShdy1	NA	acn-BAC0003,acrA-BAC0005,acrD/yffA-BAC0008,acrE/envC-BAC0009,acrF/envD-BAC0010,actP/yjcG-BAC0564,arsC-BAC0582,arsC-BAC0583,asr-BAC0038,baeS-BAC0040,bfrA-BAC0048,bhsA/ycfR/comC-BAC0049,comR/ycfQ-BAC0076,copA-BAC0725,corA-BAC0086,corB-BAC0643,corD-BAC0644,cpxA-BAC0532,cueO-BAC0103,cueR/ybbI-BAC0105,cusA/ybdE-BAC0107,cusB-BAC0108,cusC/ylcB-BAC0109,cusF/cusX-BAC0110,cusR/ylcA-BAC0111,cusS-BAC0112,cut…	NA	NA	NA	NA	NA	NA	NA	NA	NA	NA	2009-11-17	healthcare associated 31-365d	K84032	F	90	PRJNA604975	SAMN18257808
OX-BSI-180_2	429e9986-8105-40e1-bcac-7f92bc460949	429e9986-8105-40e1-bcac-7f92bc460949_2	Plasmid	BSI	182188	51.47	ecoli	73	NA	NA	1	123	aph(3'')-Ib,aph(6)-Id	IS100kyp,IS21,IS26,ISEc10,ISEc53	Col156_1,IncFIB(AP001918)_1,IncFII_1,IncFII(29)_1_pUTI89	NA	MOBF,MOBP	MPF_F	MOBF,MOBP	conjugative	PTU-FE	III	1	NA	NA	NA	2009-11-17	healthcare associated 31-365d	K84032	F	90	PRJNA604975	SAMN18257808
OX-BSI-180_3	429e9986-8105-40e1-bcac-7f92bc460949	429e9986-8105-40e1-bcac-7f92bc460949_3	Plasmid	BSI	88226	52.93	ecoli	73	NA	NA	7	58	NA	ISEc23,ISEc45,ISShdy1	IncB/O/K/Z_2	NA	MOBP	MPF_I	MOBP	conjugative	PTU-B/O/K/Z	III	0.9545	NA	NA	NA	2009-11-17	healthcare associated 31-365d	K84032	F	90	PRJNA604975	SAMN18257808
OX-BSI-180_5	429e9986-8105-40e1-bcac-7f92bc460949	429e9986-8105-40e1-bcac-7f92bc460949_5	Plasmid	BSI	5064	47.53	ecoli	73	NA	NA	NA	NA	NA	NA	ColRNAI_1	NA	-	-	MOBP	mobilizable	-	-	1	NA	NA	NA	2009-11-17	healthcare associated 31-365d	K84032	F	90	PRJNA604975	SAMN18257808
OX-BSI-181_3	42d638e9-39fd-4fb2-b5c7-1d8b011f30b1	42d638e9-39fd-4fb2-b5c7-1d8b011f30b1_3	Plasmid	BSI	5631	47.35	ecoli	95	NA	NA	11	43	NA	NA	ColRNAI_1	NA	MOBP	-	MOBP	mobilizable	PTU-E22	I	1	NA	NA	NA	2009-11-19	healthcare associated 0-30d	K84025	F	95	PRJNA604975	SAMN18257805
OX-BSI-181_4	42d638e9-39fd-4fb2-b5c7-1d8b011f30b1	42d638e9-39fd-4fb2-b5c7-1d8b011f30b1_4	Plasmid	BSI	4072	49.8	ecoli	95	NA	NA	9	51	NA	NA	Col8282_1	NA	MOBQ	-	MOBQ,MOBQ	mobilizable	PTU-E10	III	1	NA	NA	NA	2009-11-19	healthcare associated 0-30d	K84025	F	95	PRJNA604975	SAMN18257805
OX-BSI-181_2	42d638e9-39fd-4fb2-b5c7-1d8b011f30b1	42d638e9-39fd-4fb2-b5c7-1d8b011f30b1_2	Plasmid	BSI	114229	51.02	ecoli	95	NA	NA	1	123	NA	IS100kyp,IS21,IS26,ISEc10,ISEc53	Col156_1,IncFIB(AP001918)_1,IncFII(29)_1_pUTI89	NA	MOBF,MOBP	MPF_F	MOBF	conjugative	PTU-FE	III	0.6905	NA	NA	NA	2009-11-19	healthcare associated 0-30d	K84025	F	95	PRJNA604975	SAMN18257805
OX-BSI-181_1	42d638e9-39fd-4fb2-b5c7-1d8b011f30b1	42d638e9-39fd-4fb2-b5c7-1d8b011f30b1_chromo	Chromosome	BSI	4999963	50.56	ecoli	95	NA	NA	NA	NA	NA	IS100kyp,IS1203,IS1397,IS200C,IS621,ISEc20,ISEc30,ISEc38,ISEc40,ISEc45,ISEc48,ISEc53,ISEc8	NA	acn-BAC0003,acrA-BAC0005,acrD/yffA-BAC0008,acrE/envC-BAC0009,acrF/envD-BAC0010,actP/yjcG-BAC0564,arsC-BAC0582,arsC-BAC0583,asr-BAC0038,baeS-BAC0040,bfrA-BAC0048,bhsA/ycfR/comC-BAC0049,comR/ycfQ-BAC0076,copA-BAC0725,corA-BAC0086,corB-BAC0643,corD-BAC0644,cpxA-BAC0532,cueO-BAC0103,cueR/ybbI-BAC0105,cusA/ybdE-BAC0107,cusB-BAC0108,cusC/ylcB-BAC0109,cusF/cusX-BAC0110,cusR/ylcA-BAC0111,cusS-BAC0112,cut…	NA	NA	NA	NA	NA	NA	NA	NA	NA	NA	2009-11-19	healthcare associated 0-30d	K84025	F	95	PRJNA604975	SAMN18257805
OX-BSI-182_1	42fb2d23-c013-4139-8170-4fb415a6a166	42fb2d23-c013-4139-8170-4fb415a6a166_chromo	Chromosome	BSI	5027744	50.58	ecoli	95	NA	NA	NA	NA	NA	IS100kyp,IS1203,IS1397,IS200C,IS621,ISEc20,ISEc38,ISEc40,ISEc45,ISEc48,ISEc8	NA	acn-BAC0003,acrA-BAC0005,acrD/yffA-BAC0008,acrE/envC-BAC0009,acrF/envD-BAC0010,actP/yjcG-BAC0564,arsC-BAC0582,arsC-BAC0583,asr-BAC0038,baeS-BAC0040,bfrA-BAC0048,bhsA/ycfR/comC-BAC0049,comR/ycfQ-BAC0076,copA-BAC0725,corA-BAC0086,corB-BAC0643,corD-BAC0644,cpxA-BAC0532,cueO-BAC0103,cueR/ybbI-BAC0105,cusA/ybdE-BAC0107,cusB-BAC0108,cusC/ylcB-BAC0109,cusF/cusX-BAC0110,cusR/ylcA-BAC0111,cusS-BAC0112,cut…	NA	NA	NA	NA	NA	NA	NA	NA	NA	NA	2018-03-13	nosocomial	K84003	M	82	PRJNA604975	SAMN18257804
OX-BSI-182_2	42fb2d23-c013-4139-8170-4fb415a6a166	42fb2d23-c013-4139-8170-4fb415a6a166_2	Plasmid	BSI	144299	50.38	ecoli	95	NA	NA	2	100	blaTEM-1,tet(A)	IS2,IS629,ISEc32,Tn3	IncFIB(AP001918)_1	blt-BAC0050,sitA-BAC0349,sitB-BAC0350,sitC-BAC0351,sitD-BAC0352,smdB-BAC0354,tupC-BAC0607	MOBF	MPF_F	MOBF	conjugative	PTU-FE	III	0.9941	NA	NA	NA	2018-03-13	nosocomial	K84003	M	82	PRJNA604975	SAMN18257804
OX-BSI-183_2	43281714-0188-48a3-b2a7-907a3f5c368a	43281714-0188-48a3-b2a7-907a3f5c368a_2	Plasmid	BSI	124198	52.66	ecoli	73	NA	NA	5	68	aadA1,aph(3'')-Ib,aph(6)-Id,blaTEM-1,dfrA1,qacEdelta1,sul1,sul2	IS1203,IS150,IS1R,IS1X2,IS5,ISEc12	IncFIA_1,IncFIB(AP001918)_1,IncFII(pRSB107)_1_pRSB107	iclR-BAC0196,merA-BAC0652,merC-BAC0664,merD-BAC0666,merE-BAC0670,merP-BAC0678,merR-BAC0232,merT-BAC0693,qacEdelta1-BAC0323,wtpC-BAC0604	MOBF	MPF_F	-	conjugative	PTU-FE	III	1	NA	NA	NA	2016-02-21	community	K84007	M	80	PRJNA604975	SAMN18257803
OX-BSI-183_3	43281714-0188-48a3-b2a7-907a3f5c368a	43281714-0188-48a3-b2a7-907a3f5c368a_3	Plasmid	BSI	1546	51.42	ecoli	73	NA	NA	29	21	NA	NA	Col(MG828)_1	NA	-	-	MOB_unknown,MOBP	mobilizable	PTU-E9	VI	1	NA	NA	NA	2016-02-21	community	K84007	M	80	PRJNA604975	SAMN18257803
OX-BSI-183_1	43281714-0188-48a3-b2a7-907a3f5c368a	43281714-0188-48a3-b2a7-907a3f5c368a_chromo	Chromosome	BSI	5320466	50.27	ecoli	73	NA	NA	NA	NA	blaEC-5	IS100kyp,IS1203,IS150,IS1F,IS200C,IS21,IS30,IS630,ISEc13,ISEc16,ISEc20,ISEc23,ISEc39,ISEc41,ISEc42	NA	acn-BAC0003,acrA-BAC0005,acrB-BAC0006,acrD/yffA-BAC0008,acrE/envC-BAC0009,acrF/envD-BAC0010,actP/yjcG-BAC0564,arsC-BAC0582,arsC-BAC0583,asr-BAC0038,baeS-BAC0040,bfrA-BAC0048,bhsA/ycfR/comC-BAC0049,comR/ycfQ-BAC0076,copA-BAC0725,corA-BAC0086,corB-BAC0643,corD-BAC0644,cpxA-BAC0532,cueR/ybbI-BAC0105,cusA/ybdE-BAC0107,cusB-BAC0108,cusC/ylcB-BAC0109,cusF/cusX-BAC0110,cusR/ylcA-BAC0111,cusS-BAC0112,cut…	NA	NA	NA	NA	NA	NA	NA	NA	NA	NA	2016-02-21	community	K84007	M	80	PRJNA604975	SAMN18257803
OX-BSI-184_3	44027ac6-3e8e-4b70-9222-d0e6d4d0173b	44027ac6-3e8e-4b70-9222-d0e6d4d0173b_3	Plasmid	BSI	91931	52.68	ecoli	95	NA	NA	7	58	NA	ISShdy1	IncB/O/K/Z_2	NA	MOBP	MPF_I	MOBP	conjugative	PTU-B/O/K/Z	III	1	NA	NA	NA	2018-04-08	community	K84054	F	89	PRJNA604975	SAMN18257791
OX-BSI-184_1	44027ac6-3e8e-4b70-9222-d0e6d4d0173b	44027ac6-3e8e-4b70-9222-d0e6d4d0173b_chromo	Chromosome	BSI	5013321	50.63	ecoli	95	NA	NA	NA	NA	NA	IS1203,IS1397,IS150,IS200C,IS621,ISEc30,ISEc31,ISEc38,ISEc48,ISEhe3,ISSd1	NA	acn-BAC0003,acrA-BAC0005,acrD/yffA-BAC0008,acrE/envC-BAC0009,acrF/envD-BAC0010,actP/yjcG-BAC0564,arsC-BAC0582,arsC-BAC0583,asr-BAC0038,baeS-BAC0040,bfrA-BAC0048,bhsA/ycfR/comC-BAC0049,comR/ycfQ-BAC0076,copA-BAC0725,corA-BAC0086,corB-BAC0643,corD-BAC0644,cpxA-BAC0532,cueO-BAC0103,cueR/ybbI-BAC0105,cusA/ybdE-BAC0107,cusB-BAC0108,cusC/ylcB-BAC0109,cusF/cusX-BAC0110,cusR/ylcA-BAC0111,cusS-BAC0112,cut…	NA	NA	NA	NA	NA	NA	NA	NA	NA	NA	2018-04-08	community	K84054	F	89	PRJNA604975	SAMN18257791
OX-BSI-184_4	44027ac6-3e8e-4b70-9222-d0e6d4d0173b	44027ac6-3e8e-4b70-9222-d0e6d4d0173b_4	Plasmid	BSI	5167	47.51	ecoli	95	4	9	4	69	NA	NA	Col156_1	NA	MOBQ	-	-	mobilizable	PTU-E7	III	1	NA	NA	NA	2018-04-08	community	K84054	F	89	PRJNA604975	SAMN18257791
OX-BSI-184_2	44027ac6-3e8e-4b70-9222-d0e6d4d0173b	44027ac6-3e8e-4b70-9222-d0e6d4d0173b_2	Plasmid	BSI	147095	51.12	ecoli	95	NA	NA	2	100	aph(3'')-Ib,aph(6)-Id,blaTEM-1,dfrA5,sul2	IS2,IS629,ISEc32	IncFIB(AP001918)_1,IncFII_1	merA-BAC0652,merC-BAC0664,merD-BAC0665,merE-BAC0670,merP-BAC0678,merR-BAC0232,merT-BAC0693,sitA-BAC0349,sitB-BAC0350,sitC-BAC0351,sitD-BAC0352,smdB-BAC0354,tupC-BAC0607	MOBF	MPF_F	MOBF	conjugative	PTU-FE	III	1	NA	NA	NA	2018-04-08	community	K84054	F	89	PRJNA604975	SAMN18257791
OX-BSI-184_5	44027ac6-3e8e-4b70-9222-d0e6d4d0173b	44027ac6-3e8e-4b70-9222-d0e6d4d0173b_5	Plasmid	BSI	4082	50.07	ecoli	95	NA	NA	9	51	NA	NA	Col8282_1	NA	MOBQ	-	MOBQ,MOBQ	mobilizable	PTU-E10	III	1	NA	NA	NA	2018-04-08	community	K84054	F	89	PRJNA604975	SAMN18257791
OX-BSI-185_2	441e6280-ddcd-4ba7-9682-e1ad90820df6	441e6280-ddcd-4ba7-9682-e1ad90820df6_2	Plasmid	BSI	103505	51.77	ecloacae	145	NA	NA	NA	NA	NA	IS1A,ISEhe3	IncFIB(pECLA)_1_pECLA	arsB-BAC0577,arsC-BAC0585,arsH-BAC0034,arsR-BAC0588,copG-BAC0717,fecE-BAC0164,pcoA-BAC0303,pcoB-BAC0304,pcoC-BAC0305,pcoD-BAC0306,pcoE-BAC0307,pcoR-BAC0308,pcoS-BAC0309,silA-BAC0341,silB-BAC0342,silC-BAC0343,silE-BAC0344,silF-BAC0345,silP-BAC0346,silR-BAC0347,silS-BAC0348	-	MPF_F	-	non-mobilizable	PTU-E60	II	1	NA	NA	NA	NA	NA	NA	NA	NA	PRJNA604975	NA
OX-BSI-185_3	441e6280-ddcd-4ba7-9682-e1ad90820df6	441e6280-ddcd-4ba7-9682-e1ad90820df6_3	Plasmid	BSI	100446	53.82	ecloacae	145	NA	NA	192	3	NA	NA	IncFII(pECLA)_1_pECLA,IncR_1	chrA-BAC0026,chrB-BAC0027,ncrA-BAC0263,ncrB-BAC0264,ncrC-BAC0265,ncrY-BAC0266	MOBF	MPF_F	-	conjugative	PTU-E60	II	0.8	NA	NA	NA	NA	NA	NA	NA	NA	PRJNA604975	NA
OX-BSI-185_1	441e6280-ddcd-4ba7-9682-e1ad90820df6	441e6280-ddcd-4ba7-9682-e1ad90820df6_chromo	Chromosome	BSI	4821653	55.16	ecloacae	145	NA	NA	NA	NA	blaACT,fosA,oqxA,oqxB	IS1B,IS1X4,IS30,IS5,ISEc14,ISKpn26,Tn5403	NA	acn-BAC0003,acrA-BAC0005,acrB-BAC0006,acrC-BAC0007,acrD/yffA-BAC0008,acrE/envC-BAC0009,acrF/envD-BAC0010,acrR/ybaH-BAC0011,actP/yjcG-BAC0564,adeE-BAC0013,arsA-BAC0030,arsB-BAC0031,arsB-BAC0576,arsC-BAC0582,arsD-BAC0587,arsR-BAC0591,baeR-BAC0596,baeS-BAC0040,bepG-BAC0046,bfrA-BAC0048,bhsA/ycfR/comC-BAC0049,comR/ycfQ-BAC0076,copA-BAC0725,copR-BAC0719,corA-BAC0641,corB-BAC0643,corC-BAC0088,corD-BAC0…	NA	NA	NA	NA	NA	NA	NA	NA	NA	NA	NA	NA	NA	NA	NA	PRJNA604975	NA
OX-BSI-185_5	441e6280-ddcd-4ba7-9682-e1ad90820df6	441e6280-ddcd-4ba7-9682-e1ad90820df6_5	Plasmid	BSI	4859	52.44	ecloacae	145	NA	NA	51	12	NA	NA	Col440II_1,ColRNAI_1	NA	MOBP	-	MOBP	mobilizable	PTU-E3	V	0.9559	NA	NA	NA	NA	NA	NA	NA	NA	PRJNA604975	NA
OX-BSI-185_4	441e6280-ddcd-4ba7-9682-e1ad90820df6	441e6280-ddcd-4ba7-9682-e1ad90820df6_4	Plasmid	BSI	63589	51.22	ecloacae	145	8	7	84	7	blaOXA-48	NA	IncL/M(pOXA-48)_1_pOXA-48	adeL-BAC0508	MOBP	MPF_I	-	conjugative	PTU-L/M	IV	1	NA	NA	NA	NA	NA	NA	NA	NA	PRJNA604975	NA
OX-BSI-186_3	44364fb4-f521-4dfd-adef-29c02e7d8cf6	44364fb4-f521-4dfd-adef-29c02e7d8cf6_3	Plasmid	BSI	6230	49.28	ecoli	95	NA	NA	24	25	NA	NA	Col156_1	NA	MOBQ	-	-	mobilizable	PTU-E7	III	1	NA	NA	NA	2012-05-30	healthcare associated 31-365d	K84017	F	43	PRJNA604975	SAMN14345065
OX-BSI-186_2	44364fb4-f521-4dfd-adef-29c02e7d8cf6	44364fb4-f521-4dfd-adef-29c02e7d8cf6_2	Plasmid	BSI	120366	50.74	ecoli	95	NA	NA	1	123	blaTEM-1	IS100kyp,IS1R,IS21,ISEc23,ISEc53	Col156_1,IncFIB(AP001918)_1,IncFII(29)_1_pUTI89	NA	MOBF,MOBP	MPF_F	MOBF	conjugative	PTU-FE	III	1	NA	NA	NA	2012-05-30	healthcare associated 31-365d	K84017	F	43	PRJNA604975	SAMN14345065
OX-BSI-186_1	44364fb4-f521-4dfd-adef-29c02e7d8cf6	44364fb4-f521-4dfd-adef-29c02e7d8cf6_chromo	Chromosome	BSI	5147832	50.54	ecoli	95	NA	NA	NA	NA	aadA1,dfrA1,sat2	IS100kyp,IS1203,IS1397,IS1R,IS200C,IS621,ISEc20,ISEc30,ISEc38,ISEc40,ISEc45,ISEc48,ISEc8	NA	acn-BAC0003,acrA-BAC0005,acrB-BAC0006,acrD/yffA-BAC0008,acrE/envC-BAC0009,acrF/envD-BAC0010,actP/yjcG-BAC0564,arsC-BAC0582,arsC-BAC0583,asr-BAC0038,baeS-BAC0040,bfrA-BAC0048,bhsA/ycfR/comC-BAC0049,comR/ycfQ-BAC0076,copA-BAC0725,corA-BAC0086,corB-BAC0643,corD-BAC0644,cpxA-BAC0532,cueR/ybbI-BAC0105,cusA/ybdE-BAC0107,cusB-BAC0108,cusC/ylcB-BAC0109,cusF/cusX-BAC0110,cusR/ylcA-BAC0111,cusS-BAC0112,cut…	NA	NA	NA	NA	NA	NA	NA	NA	NA	NA	2012-05-30	healthcare associated 31-365d	K84017	F	43	PRJNA604975	SAMN14345065
OX-BSI-187_1	44f12724-8e64-4bb9-876e-70a8010173e1	44f12724-8e64-4bb9-876e-70a8010173e1_chromo	Chromosome	BSI	5096561	50.65	ecoli	-	NA	NA	NA	NA	NA	IS1351,IS1397,IS200C,IS21,ISEc1,ISEc13,ISEc16,ISEc18,ISEc20,ISEc31,ISEc42,ISEc8,ISSaen1	NA	acn-BAC0003,acrA-BAC0005,acrD/yffA-BAC0008,acrE/envC-BAC0009,acrF/envD-BAC0010,actP/yjcG-BAC0564,arsC-BAC0582,arsC-BAC0583,asr-BAC0038,baeS-BAC0040,bfrA-BAC0048,bhsA/ycfR/comC-BAC0049,comR/ycfQ-BAC0076,copA-BAC0725,copS-BAC0752,corA-BAC0086,corB-BAC0643,corD-BAC0644,cpxA-BAC0532,cueO-BAC0103,cueR/ybbI-BAC0105,cusA/ybdE-BAC0107,cusB-BAC0108,cusC/ylcB-BAC0109,cusF/cusX-BAC0110,cusR/ylcA-BAC0111,cus…	NA	NA	NA	NA	NA	NA	NA	NA	NA	NA	2018-01-25	nosocomial	K84037	M	0	PRJNA604975	SAMN18257783
OX-BSI-188_2	45074c78-1a26-4d99-a373-775c07f93151	45074c78-1a26-4d99-a373-775c07f93151_2	Plasmid	BSI	33587	48.85	ecoli	131	NA	NA	NA	NA	NA	NA	NA	triC-BAC0398	MOBF	MPF_T	-	conjugative	PTU-N3	III	1	NA	NA	NA	2018-04-06	community	K84050	F	71	PRJNA604975	SAMN18257782
OX-BSI-188_3	45074c78-1a26-4d99-a373-775c07f93151	45074c78-1a26-4d99-a373-775c07f93151_3	Plasmid	BSI	1822	44.51	ecoli	131	NA	NA	146	4	NA	NA	Col(MG828)_1	NA	-	-	-	non-mobilizable	-	-	1	NA	NA	NA	2018-04-06	community	K84050	F	71	PRJNA604975	SAMN18257782
OX-BSI-188_1	45074c78-1a26-4d99-a373-775c07f93151	45074c78-1a26-4d99-a373-775c07f93151_chromo	Chromosome	BSI	4947820	50.78	ecoli	131	NA	NA	NA	NA	NA	IS100kyp,IS1203,IS1R,IS2,IS200C,IS30,IS609,ISEc1,ISEc20,ISEc24,ISEc38,ISEc53	NA	acn-BAC0003,acrA-BAC0005,acrD/yffA-BAC0008,acrE/envC-BAC0009,acrF/envD-BAC0010,actP/yjcG-BAC0564,arsC-BAC0582,arsC-BAC0583,asr-BAC0038,baeS-BAC0040,bfrA-BAC0048,bhsA/ycfR/comC-BAC0049,comR/ycfQ-BAC0076,copA-BAC0725,corA-BAC0086,corB-BAC0643,corD-BAC0644,cpxA-BAC0532,cueR/ybbI-BAC0105,cusA/ybdE-BAC0107,cusB-BAC0108,cusC/ylcB-BAC0109,cusF/cusX-BAC0110,cusR/ylcA-BAC0111,cusS-BAC0112,cutA-BAC0113,cut…	NA	NA	NA	NA	NA	NA	NA	NA	NA	NA	2018-04-06	community	K84050	F	71	PRJNA604975	SAMN18257782
OX-BSI-189_1	451e14ea-b517-45b0-a9fc-65ca5eda1c35	451e14ea-b517-45b0-a9fc-65ca5eda1c35_chromo	Chromosome	BSI	5121342	57.64	kpneumoniae	1017	NA	NA	NA	NA	blaSHV-11,fosA,fosA7,oqxA,oqxB	IS1351	NA	acn-BAC0003,acrA-BAC0005,acrB-BAC0006,acrC-BAC0007,acrD-BAC0563,acrE/envC-BAC0009,acrF/envD-BAC0010,actP/yjcG-BAC0564,adeE-BAC0013,arsB-BAC0578,arsC-BAC0582,arsC-BAC0583,arsR-BAC0589,baeR-BAC0596,baeS-BAC0040,bfrA-BAC0048,bhsA/ycfR/comC-BAC0049,cepA-BAC0061,comR/ycfQ-BAC0076,copA-BAC0725,corA-BAC0086,corB-BAC0643,corD-BAC0644,corR-BAC0089,cpxA-BAC0532,cueR/ybbI-BAC0105,cusA/ybdE-BAC0107,cusB-BAC0…	NA	NA	NA	NA	NA	NA	NA	NA	NA	NA	2018-01-19	nosocomial	K84050	F	35	PRJNA604975	NA
OX-BSI-190_2	45678cfb-c4ad-45ee-8f30-c7926928424c	45678cfb-c4ad-45ee-8f30-c7926928424c_2	Plasmid	BSI	161969	51.1	kpneumoniae	-	NA	NA	16	37	aac(3)-IIe,aac(6')-Ib-cr5,blaCTX-M-15,blaOXA-1,catB3,dfrA14	IS1A,IS1F,IS6100,IS903B,ISEc52,ISEc9,ISEcl1,ISKpn11,ISSen4	IncFIB(K)_1_Kpn3	arsA-BAC0030,arsB-BAC0576,arsC-BAC0583,arsD-BAC0587,arsR-BAC0591,copG-BAC0717,frnE-BAC0170,pcoA-BAC0303,pcoB-BAC0304,pcoC-BAC0305,pcoD-BAC0306,pcoE-BAC0307,pcoR-BAC0308,pcoS-BAC0309,silA-BAC0341,silB-BAC0342,silC-BAC0343,silE-BAC0344,silF-BAC0345,silP-BAC0346,silR-BAC0347,silS-BAC0348	MOBF,MOBF	MPF_F	-	conjugative	PTU-FK	III	0.9766	NA	NA	NA	NA	NA	NA	NA	NA	PRJNA604975	NA
OX-BSI-190_1	45678cfb-c4ad-45ee-8f30-c7926928424c	45678cfb-c4ad-45ee-8f30-c7926928424c_chromo	Chromosome	BSI	5188000	57.47	kpneumoniae	-	NA	NA	NA	NA	blaSHV-11,fosA,oqxA,oqxB	IS2,IS903B,ISEc33,ISKox1	NA	acn-BAC0003,acrA-BAC0005,acrB-BAC0006,acrC-BAC0007,acrD-BAC0563,acrE/envC-BAC0009,acrF/envD-BAC0010,actP/yjcG-BAC0564,adeE-BAC0013,arsB-BAC0578,arsC-BAC0582,arsC-BAC0583,arsR-BAC0589,baeR-BAC0596,baeS-BAC0040,bepG-BAC0046,bfrA-BAC0048,bhsA/ycfR/comC-BAC0049,cepA-BAC0061,chrA-BAC0026,chrB-BAC0027,comR/ycfQ-BAC0076,copA-BAC0725,corA-BAC0086,corB-BAC0643,corD-BAC0644,corR-BAC0089,cpxA-BAC0532,cueR/y…	NA	NA	NA	NA	NA	NA	NA	NA	NA	NA	NA	NA	NA	NA	NA	PRJNA604975	NA
OX-BSI-191_2	45b6c721-7bf3-4e87-a8b4-fcbf31fcd0c1	45b6c721-7bf3-4e87-a8b4-fcbf31fcd0c1_2	Plasmid	BSI	6210	48.63	ecoli	80	NA	NA	NA	NA	NA	NA	Col156_1	NA	MOBQ	-	-	mobilizable	PTU-E7	III	1	NA	NA	NA	2009-03-27	community	K84043	M	81	PRJNA604975	SAMN18257775
OX-BSI-191_1	45b6c721-7bf3-4e87-a8b4-fcbf31fcd0c1	45b6c721-7bf3-4e87-a8b4-fcbf31fcd0c1_chromo	Chromosome	BSI	5110111	50.52	ecoli	80	NA	NA	NA	NA	blaEC-5	IS1397,IS621,IS630,ISEc13,ISEc16,ISEc39,ISEc42,ISEc47	NA	acn-BAC0003,acrA-BAC0005,acrD/yffA-BAC0008,acrE/envC-BAC0009,acrF/envD-BAC0010,actP/yjcG-BAC0564,arsC-BAC0582,arsC-BAC0583,asr-BAC0038,baeS-BAC0040,bfrA-BAC0048,bhsA/ycfR/comC-BAC0049,comR/ycfQ-BAC0076,copA-BAC0725,corA-BAC0086,corB-BAC0643,corD-BAC0644,cpxA-BAC0532,cueO-BAC0103,cueR/ybbI-BAC0105,cusA/ybdE-BAC0107,cusB-BAC0108,cusC/ylcB-BAC0109,cusF/cusX-BAC0110,cusR/ylcA-BAC0111,cusS-BAC0112,cut…	NA	NA	NA	NA	NA	NA	NA	NA	NA	NA	2009-03-27	community	K84043	M	81	PRJNA604975	SAMN18257775
OX-BSI-191_3	45b6c721-7bf3-4e87-a8b4-fcbf31fcd0c1	45b6c721-7bf3-4e87-a8b4-fcbf31fcd0c1_3	Plasmid	BSI	4315	43.64	ecoli	80	NA	NA	100	6	NA	NA	NA	NA	-	-	MOB_unknown,MOBF,MOBP	mobilizable	PTU-E58	III	1	NA	NA	NA	2009-03-27	community	K84043	M	81	PRJNA604975	SAMN18257775
OX-BSI-192_2	461e929a-e4c1-4f9d-9f04-6a21b3dfa9af	461e929a-e4c1-4f9d-9f04-6a21b3dfa9af_2	Plasmid	BSI	192339	49.45	ecoli	569	NA	NA	2	100	NA	IS100kyp,IS30,ISCro3	IncFIB(AP001918)_1,IncFIC(FII)_1	fecD-BAC0163,fecE-BAC0164,sitA-BAC0349,sitB-BAC0350,sitC-BAC0351,sitD-BAC0352,smdB-BAC0354,tupC-BAC0607	MOBF	MPF_F	MOBF	conjugative	PTU-FE	III	0.9941	NA	NA	NA	2009-10-17	nosocomial	K84028	F	83	PRJNA604975	SAMN18257770
OX-BSI-192_1	461e929a-e4c1-4f9d-9f04-6a21b3dfa9af	461e929a-e4c1-4f9d-9f04-6a21b3dfa9af_chromo	Chromosome	BSI	4780566	50.66	ecoli	569	NA	NA	NA	NA	NA	IS1397,IS200C,IS4,IS621,ISEc42	NA	acn-BAC0003,acrA-BAC0005,acrD/yffA-BAC0008,acrE/envC-BAC0009,acrF/envD-BAC0010,actP/yjcG-BAC0564,arsC-BAC0582,asr-BAC0038,baeS-BAC0040,bfrA-BAC0048,bhsA/ycfR/comC-BAC0049,comR/ycfQ-BAC0076,copA-BAC0725,corA-BAC0086,corB-BAC0643,corD-BAC0644,cpxA-BAC0532,cueO-BAC0103,cueR/ybbI-BAC0105,cusA/ybdE-BAC0107,cusB-BAC0108,cusC/ylcB-BAC0109,cusF/cusX-BAC0110,cusR/ylcA-BAC0111,cusS-BAC0112,cutA-BAC0113,cut…	NA	NA	NA	NA	NA	NA	NA	NA	NA	NA	2009-10-17	nosocomial	K84028	F	83	PRJNA604975	SAMN18257770
OX-BSI-193_3	462f6b7d-946c-45bb-b8ab-f3d4c2f5d015	462f6b7d-946c-45bb-b8ab-f3d4c2f5d015_3	Plasmid	BSI	3766	51.78	ecoli	10	NA	NA	193	3	NA	NA	Col156_1	NA	MOBQ	-	-	mobilizable	PTU-E7	III	1	NA	NA	NA	NA	NA	NA	NA	NA	PRJNA604975	NA
OX-BSI-193_1	462f6b7d-946c-45bb-b8ab-f3d4c2f5d015	462f6b7d-946c-45bb-b8ab-f3d4c2f5d015_chromo	Chromosome	BSI	4757336	50.6	ecoli	10	NA	NA	NA	NA	NA	IS150,IS1F,IS200C,IS609,ISEc26,ISEc38,ISEc5	NA	acn-BAC0003,acrA-BAC0005,acrB-BAC0006,acrD/yffA-BAC0008,acrE/envC-BAC0009,acrF/envD-BAC0010,actP/yjcG-BAC0564,arsB-BAC0576,arsC-BAC0583,arsC-BAC0584,arsR-BAC0594,asr-BAC0038,baeS-BAC0040,bfrA-BAC0048,bhsA/ycfR/comC-BAC0049,comR/ycfQ-BAC0076,copA-BAC0725,copS-BAC0752,corA-BAC0086,corB-BAC0643,corD-BAC0644,cpxA-BAC0532,cueO-BAC0103,cueR/ybbI-BAC0105,cusA/ybdE-BAC0107,cusB-BAC0108,cusC/ylcB-BAC0109,…	NA	NA	NA	NA	NA	NA	NA	NA	NA	NA	NA	NA	NA	NA	NA	PRJNA604975	NA
OX-BSI-193_2	462f6b7d-946c-45bb-b8ab-f3d4c2f5d015	462f6b7d-946c-45bb-b8ab-f3d4c2f5d015_2	Plasmid	BSI	47506	47.67	ecoli	10	NA	NA	NA	NA	NA	ISEc17	IncFIB(AP001918)_1,IncFIC(FII)_1	NA	MOBF	-	-	mobilizable	-	-	1	NA	NA	NA	NA	NA	NA	NA	NA	PRJNA604975	NA
OX-BSI-194_2	46961947-f400-4ca3-8d92-817d4f4eb040	46961947-f400-4ca3-8d92-817d4f4eb040_2	Plasmid	BSI	99311	52.05	ecoli	131	NA	NA	5	68	aadA5,aph(3'')-Ib,aph(6)-Id,blaCTX-M-27,dfrA17,mph(A),qacEdelta1,sul1,sul2,tet(A)	IS150,IS1A,IS1B,IS1X2,IS5,IS6100,ISEc23	IncFIA_1,IncFIB(AP001918)_1,IncFII(pRSB107)_1_pRSB107	blt-BAC0050,qacEdelta1-BAC0323	MOBF	MPF_F	MOBF	conjugative	PTU-FE	III	1	NA	NA	NA	2016-11-30	healthcare associated 31-365d	K84618	F	82	PRJNA604975	SAMN18257762
OX-BSI-194_4	46961947-f400-4ca3-8d92-817d4f4eb040	46961947-f400-4ca3-8d92-817d4f4eb040_4	Plasmid	BSI	1549	51	ecoli	131	11	5	8	57	NA	NA	Col(MG828)_1	NA	-	-	MOB_unknown,MOBP	mobilizable	PTU-E9	VI	1	NA	NA	NA	2016-11-30	healthcare associated 31-365d	K84618	F	82	PRJNA604975	SAMN18257762
OX-BSI-194_1	46961947-f400-4ca3-8d92-817d4f4eb040	46961947-f400-4ca3-8d92-817d4f4eb040_chromo	Chromosome	BSI	4922074	50.73	ecoli	131	NA	NA	NA	NA	NA	IS100kyp,IS1203,IS1F,IS1R,IS2,IS200C,IS30,IS609,ISEc1,ISEc20,ISEc24,ISEc38,ISEc53,ISEc8,ISSd1	NA	acn-BAC0003,acrA-BAC0005,acrD/yffA-BAC0008,acrE/envC-BAC0009,acrF/envD-BAC0010,actP/yjcG-BAC0564,arsC-BAC0582,arsC-BAC0583,asr-BAC0038,baeS-BAC0040,bfrA-BAC0048,bhsA/ycfR/comC-BAC0049,comR/ycfQ-BAC0076,copA-BAC0725,corA-BAC0086,corB-BAC0643,corD-BAC0644,cpxA-BAC0532,cueO-BAC0103,cueR/ybbI-BAC0105,cusA/ybdE-BAC0107,cusB-BAC0108,cusC/ylcB-BAC0109,cusF/cusX-BAC0110,cusR/ylcA-BAC0111,cusS-BAC0112,cut…	NA	NA	NA	NA	NA	NA	NA	NA	NA	NA	2016-11-30	healthcare associated 31-365d	K84618	F	82	PRJNA604975	SAMN18257762
OX-BSI-194_3	46961947-f400-4ca3-8d92-817d4f4eb040	46961947-f400-4ca3-8d92-817d4f4eb040_3	Plasmid	BSI	5166	47.52	ecoli	131	35	2	4	69	NA	NA	Col156_1	NA	MOBQ	-	-	mobilizable	PTU-E7	III	1	NA	NA	NA	2016-11-30	healthcare associated 31-365d	K84618	F	82	PRJNA604975	SAMN18257762
OX-BSI-195_5	46e46d4f-d048-4817-8590-11957b907f49	46e46d4f-d048-4817-8590-11957b907f49_5	Plasmid	BSI	5716	42.35	ecoli	1800	NA	NA	31	20	NA	NA	Col156_1	NA	MOBQ	-	-	mobilizable	-	-	1	NA	NA	NA	2009-05-26	nosocomial	K84047	M	82	PRJNA604975	SAMN18257758
OX-BSI-195_3	46e46d4f-d048-4817-8590-11957b907f49	46e46d4f-d048-4817-8590-11957b907f49_3	Plasmid	BSI	81023	50.8	ecoli	1800	NA	NA	194	3	NA	IS186B,IS1A,IS2,ISEc17	IncFIA_1	opmD/nmpC-BAC0290	MOBF	MPF_F	MOBF	conjugative	PTU-FE	III	1	NA	NA	NA	2009-05-26	nosocomial	K84047	M	82	PRJNA604975	SAMN18257758
OX-BSI-195_4	46e46d4f-d048-4817-8590-11957b907f49	46e46d4f-d048-4817-8590-11957b907f49_4	Plasmid	BSI	6988	47.58	ecoli	1800	NA	NA	120	5	NA	NA	ColRNAI_1	NA	MOBP,MOBP,MOBP	-	MOBP	mobilizable	PTU-E14	III	1	NA	NA	NA	2009-05-26	nosocomial	K84047	M	82	PRJNA604975	SAMN18257758
OX-BSI-195_2	46e46d4f-d048-4817-8590-11957b907f49	46e46d4f-d048-4817-8590-11957b907f49_2	Plasmid	BSI	108899	51.4	ecoli	1800	NA	NA	NA	NA	NA	IS186B,IS2,ISEc39,ISEc8	IncB/O/K/Z_2	NA	MOBP	MPF_I	MOBP	conjugative	PTU-B/O/K/Z	III	1	NA	NA	NA	2009-05-26	nosocomial	K84047	M	82	PRJNA604975	SAMN18257758
OX-BSI-195_1	46e46d4f-d048-4817-8590-11957b907f49	46e46d4f-d048-4817-8590-11957b907f49_chromo	Chromosome	BSI	5060810	50.8	ecoli	1800	NA	NA	NA	NA	NA	IS1F,IS1H,IS200C,ISEc1,ISEc13,ISEc16,ISEc26,ISEc31,ISEc38,ISEc8	NA	acn-BAC0003,acrA-BAC0005,acrB-BAC0006,acrD/yffA-BAC0008,acrE/envC-BAC0009,acrF/envD-BAC0010,actP/yjcG-BAC0564,arsB-BAC0576,arsC-BAC0583,arsC-BAC0584,arsP-BAC0036,arsR-BAC0594,asr-BAC0038,baeS-BAC0040,bfrA-BAC0048,bhsA/ycfR/comC-BAC0049,comR/ycfQ-BAC0076,copA-BAC0725,corA-BAC0086,corB-BAC0643,corD-BAC0644,cpxA-BAC0532,cueO-BAC0103,cueR/ybbI-BAC0105,cusA/ybdE-BAC0107,cusB-BAC0108,cusC/ylcB-BAC0109,…	NA	NA	NA	NA	NA	NA	NA	NA	NA	NA	2009-05-26	nosocomial	K84047	M	82	PRJNA604975	SAMN18257758
OX-BSI-196_6	46eaac8e-40fa-4e37-ad5d-7cf5d2827c1a	46eaac8e-40fa-4e37-ad5d-7cf5d2827c1a_6	Plasmid	BSI	9553	51.74	kpneumoniae	490	5	32	18	34	NA	Tn5403	NA	NA	MOBP	-	-	mobilizable	-	-	1	NA	NA	NA	2010-12-26	healthcare associated 0-30d	K84043	M	90	PRJNA604975	SAMN14345064
OX-BSI-196_4	46eaac8e-40fa-4e37-ad5d-7cf5d2827c1a	46eaac8e-40fa-4e37-ad5d-7cf5d2827c1a_4	Plasmid	BSI	93237	52.1	kpneumoniae	490	13	2	117	5	NA	IS5075,Tn5403	FII(pBK30683)_1	NA	MOBF,MOBF	MPF_F	-	conjugative	PTU-E42	I	1	NA	NA	NA	2010-12-26	healthcare associated 0-30d	K84043	M	90	PRJNA604975	SAMN14345064
OX-BSI-196_7	46eaac8e-40fa-4e37-ad5d-7cf5d2827c1a	46eaac8e-40fa-4e37-ad5d-7cf5d2827c1a_7	Plasmid	BSI	1697	44.49	kpneumoniae	490	NA	NA	26	23	NA	NA	NA	NA	-	-	-	non-mobilizable	-	-	1	NA	NA	NA	2010-12-26	healthcare associated 0-30d	K84043	M	90	PRJNA604975	SAMN14345064
OX-BSI-196_3	46eaac8e-40fa-4e37-ad5d-7cf5d2827c1a	46eaac8e-40fa-4e37-ad5d-7cf5d2827c1a_3	Plasmid	BSI	123532	52.36	kpneumoniae	490	12	4	13	41	aph(3'')-Ib,aph(6)-Id,blaCTX-M-15,blaTEM-1,dfrA14,qnrB1,sul2	IS102,IS5075,IS6100,ISEc9	IncFII_1_pKP91	NA	MOBF,MOBF	MPF_F	-	conjugative	PTU-FK	III	1	NA	NA	NA	2010-12-26	healthcare associated 0-30d	K84043	M	90	PRJNA604975	SAMN14345064
OX-BSI-196_2	46eaac8e-40fa-4e37-ad5d-7cf5d2827c1a	46eaac8e-40fa-4e37-ad5d-7cf5d2827c1a_2	Plasmid	BSI	224365	51.11	kpneumoniae	490	NA	NA	19	33	NA	IS1A,IS1X4,IS903,ISEc21,ISEc36,ISKox1,ISKpn2,ISKpn21,ISKpn24,ISSen3	IncFIB(K)_1_Kpn3	copG-BAC0717,fecE-BAC0164,pcoA-BAC0303,pcoB-BAC0304,pcoC-BAC0305,pcoD-BAC0306,pcoE-BAC0307,pcoR-BAC0308,pcoS-BAC0309,pstB-BAC0316,silA-BAC0341,silB-BAC0342,silC-BAC0343,silE-BAC0344,silF-BAC0345,silP-BAC0346,silR-BAC0347,silS-BAC0348	-	-	-	non-mobilizable	PTU-E35	I	1	NA	NA	NA	2010-12-26	healthcare associated 0-30d	K84043	M	90	PRJNA604975	SAMN14345064
OX-BSI-196_1	46eaac8e-40fa-4e37-ad5d-7cf5d2827c1a	46eaac8e-40fa-4e37-ad5d-7cf5d2827c1a_chromo	Chromosome	BSI	5410919	57.36	kpneumoniae	490	NA	NA	NA	NA	blaSHV-1,fosA,oqxA,oqxB	IS5075,ISEc21,Tn5403	NA	acn-BAC0003,acrA-BAC0005,acrB-BAC0006,acrC-BAC0007,acrD-BAC0563,acrE/envC-BAC0009,acrF/envD-BAC0010,actP/yjcG-BAC0564,adeE-BAC0013,arsB-BAC0578,arsC-BAC0582,arsC-BAC0583,arsR-BAC0589,baeR-BAC0596,baeS-BAC0040,bepG-BAC0046,bfrA-BAC0048,bhsA/ycfR/comC-BAC0049,cepA-BAC0061,comR/ycfQ-BAC0076,copA-BAC0725,corA-BAC0086,corB-BAC0643,corD-BAC0644,corR-BAC0089,cpxA-BAC0532,cueR/ybbI-BAC0105,cusA/ybdE-BAC0…	NA	NA	NA	NA	NA	NA	NA	NA	NA	NA	2010-12-26	healthcare associated 0-30d	K84043	M	90	PRJNA604975	SAMN14345064
OX-BSI-196_5	46eaac8e-40fa-4e37-ad5d-7cf5d2827c1a	46eaac8e-40fa-4e37-ad5d-7cf5d2827c1a_5	Plasmid	BSI	19078	47.58	kpneumoniae	490	NA	NA	20	32	NA	IS102,IS1X4,ISSen4,Tn5403	IncFIA(HI1)_1_HI1	NA	-	-	MOBF	mobilizable	-	-	1	NA	NA	NA	2010-12-26	healthcare associated 0-30d	K84043	M	90	PRJNA604975	SAMN14345064
OX-BSI-197_2	46f08c17-78e9-4324-9d08-23cb67dfd219	46f08c17-78e9-4324-9d08-23cb67dfd219_2	Plasmid	BSI	114230	51.02	ecoli	131	200	2	1	123	NA	IS100kyp,IS21,IS26,ISEc10,ISEc53	Col156_1,IncFIB(AP001918)_1,IncFII(29)_1_pUTI89	NA	MOBF,MOBP	MPF_F	MOBF	conjugative	PTU-FE	III	1	NA	NA	NA	2011-02-14	community	K83066	M	69	PRJNA604975	SAMN18257756
OX-BSI-197_1	46f08c17-78e9-4324-9d08-23cb67dfd219	46f08c17-78e9-4324-9d08-23cb67dfd219_chromo	Chromosome	BSI	5081796	50.76	ecoli	131	NA	NA	NA	NA	NA	IS100kyp,IS1203,IS1F,IS200C,IS30,IS609,IS903B,ISEc1,ISEc20,ISEc22,ISEc24,ISEc38,ISEc40,ISEc52,ISEc8,ISSd1	NA	acn-BAC0003,acrA-BAC0005,acrD/yffA-BAC0008,acrE/envC-BAC0009,acrF/envD-BAC0010,actP/yjcG-BAC0564,arsC-BAC0582,arsC-BAC0583,asr-BAC0038,baeS-BAC0040,bfrA-BAC0048,bhsA/ycfR/comC-BAC0049,comR/ycfQ-BAC0076,copA-BAC0725,corA-BAC0086,corB-BAC0643,corC-BAC0088,corD-BAC0644,cpxA-BAC0532,cueO-BAC0103,cueR/ybbI-BAC0105,cusA/ybdE-BAC0107,cusB-BAC0108,cusC/ylcB-BAC0109,cusF/cusX-BAC0110,cusR/ylcA-BAC0111,cus…	NA	NA	NA	NA	NA	NA	NA	NA	NA	NA	2011-02-14	community	K83066	M	69	PRJNA604975	SAMN18257756
OX-BSI-197_3	46f08c17-78e9-4324-9d08-23cb67dfd219	46f08c17-78e9-4324-9d08-23cb67dfd219_3	Plasmid	BSI	9556	44.97	ecoli	131	NA	NA	NA	NA	NA	NA	ColRNAI_1	NA	MOBP,MOBP	-	MOBP	mobilizable	PTU-E1	III	0.7917	NA	NA	NA	2011-02-14	community	K83066	M	69	PRJNA604975	SAMN18257756
OX-BSI-198_1	47031fef-6208-467d-9881-9be19052b468	47031fef-6208-467d-9881-9be19052b468_chromo	Chromosome	BSI	5311722	50.67	ecoli	131	NA	NA	NA	NA	aac(3)-IIe,aac(6')-Ib-cr5,blaCTX-M-15,blaOXA-1,catB3,mph(A)	IS100kyp,IS150,IS1F,IS2,IS200C,IS30,IS4,IS609,IS6100,IS682,ISEc1,ISEc10,ISEc20,ISEc24,ISEc38,ISEc53,ISEc8,ISKpn11,ISSd1	NA	acn-BAC0003,acrA-BAC0005,acrD/yffA-BAC0008,acrE/envC-BAC0009,acrF/envD-BAC0010,actP/yjcG-BAC0564,arsC-BAC0582,arsC-BAC0583,asr-BAC0038,baeS-BAC0040,bfrA-BAC0048,bhsA/ycfR/comC-BAC0049,comR/ycfQ-BAC0076,copA-BAC0725,corA-BAC0086,corB-BAC0643,corD-BAC0644,cpxA-BAC0532,cueO-BAC0103,cueR/ybbI-BAC0105,cusA/ybdE-BAC0107,cusB-BAC0108,cusC/ylcB-BAC0109,cusF/cusX-BAC0110,cusR/ylcA-BAC0111,cusS-BAC0112,cut…	NA	NA	NA	NA	NA	NA	NA	NA	NA	NA	2015-08-12	healthcare associated 31-365d	K84040	F	84	PRJNA604975	NA
OX-BSI-198_3	47031fef-6208-467d-9881-9be19052b468	47031fef-6208-467d-9881-9be19052b468_3	Plasmid	BSI	96475	52.99	ecoli	131	NA	NA	7	58	aph(3'')-Ib,aph(6)-Id,blaTEM-1,dfrA14,sul2	ISEc13,Tn3	IncB/O/K/Z_2	NA	MOBP	MPF_I	MOBP	conjugative	PTU-B/O/K/Z	III	0.9545	NA	NA	NA	2015-08-12	healthcare associated 31-365d	K84040	F	84	PRJNA604975	NA
OX-BSI-198_2	47031fef-6208-467d-9881-9be19052b468	47031fef-6208-467d-9881-9be19052b468_2	Plasmid	BSI	118319	51.13	ecoli	131	NA	NA	1	123	NA	IS100kyp,IS21,IS26,ISEc10,ISEc13,ISEc23,ISEc53	Col156_1,IncFIB(AP001918)_1,IncFII(29)_1_pUTI89	NA	MOBF,MOBP	MPF_F	MOBF	conjugative	PTU-FE	III	0.6882	NA	NA	NA	2015-08-12	healthcare associated 31-365d	K84040	F	84	PRJNA604975	NA
OX-BSI-199_1	4784f012-8eff-48a5-b2da-2caea24257b0	4784f012-8eff-48a5-b2da-2caea24257b0_chromo	Chromosome	BSI	4925571	50.65	ecoli	95	NA	NA	NA	NA	NA	IS1203,IS1397,IS1F,IS200C,IS5,IS621,IS629,IS911,ISEc16,ISEc30,ISEc31,ISEc38,ISEc45,ISEc48,ISSd1,ISShdy2	NA	acn-BAC0003,acrA-BAC0005,acrD/yffA-BAC0008,acrE/envC-BAC0009,acrF/envD-BAC0010,actP/yjcG-BAC0564,arsC-BAC0582,arsC-BAC0583,asr-BAC0038,baeS-BAC0040,bfrA-BAC0048,bhsA/ycfR/comC-BAC0049,comR/ycfQ-BAC0076,copA-BAC0725,copS-BAC0752,corA-BAC0086,corB-BAC0643,corD-BAC0644,corR-BAC0089,cpxA-BAC0532,cueO-BAC0103,cueR/ybbI-BAC0105,cusA/ybdE-BAC0107,cusB-BAC0108,cusC/ylcB-BAC0109,cusF/cusX-BAC0110,cusR/ylc…	NA	NA	NA	NA	NA	NA	NA	NA	NA	NA	2018-10-12	community	K82048	M	59	PRJNA604975	SAMN18257753
OX-BSI-199_4	4784f012-8eff-48a5-b2da-2caea24257b0	4784f012-8eff-48a5-b2da-2caea24257b0_4	Plasmid	BSI	2312	41.09	ecoli	95	NA	NA	96	6	NA	NA	Col(MG828)_1	NA	-	-	-	non-mobilizable	-	-	1	NA	NA	NA	2018-10-12	community	K82048	M	59	PRJNA604975	SAMN18257753
OX-BSI-199_2	4784f012-8eff-48a5-b2da-2caea24257b0	4784f012-8eff-48a5-b2da-2caea24257b0_2	Plasmid	BSI	141273	51.48	ecoli	95	NA	NA	2	100	dfrA5,tet(A)	IS2,IS26,IS3411,IS629,ISEc32	IncFIB(AP001918)_1,IncFII_1	blt-BAC0050,merA-BAC0652,merC-BAC0664,merD-BAC0666,merE-BAC0670,merP-BAC0678,merR-BAC0232,merT-BAC0693,sitA-BAC0349,sitB-BAC0350,sitC-BAC0351,sitD-BAC0352,smdB-BAC0354,tupC-BAC0607	MOBF	MPF_F	MOBF	conjugative	PTU-?	III	0.6905	NA	NA	NA	2018-10-12	community	K82048	M	59	PRJNA604975	SAMN18257753
OX-BSI-199_3	4784f012-8eff-48a5-b2da-2caea24257b0	4784f012-8eff-48a5-b2da-2caea24257b0_3	Plasmid	BSI	4197	42.39	ecoli	95	NA	NA	195	3	NA	NA	ColRNAI_1	NA	-	-	MOB_unknown,MOBP	mobilizable	PTU-E58	III	0.8125	NA	NA	NA	2018-10-12	community	K82048	M	59	PRJNA604975	SAMN18257753
OX-BSI-200_7	47e15372-7c9f-41be-a536-36c5e5cffd19	47e15372-7c9f-41be-a536-36c5e5cffd19_7	Plasmid	BSI	5631	47.38	ecoli	390	NA	NA	11	43	NA	NA	ColRNAI_1	NA	MOBP	-	MOBP	mobilizable	PTU-E22	I	1	NA	NA	NA	2018-04-05	healthcare associated 31-365d	K84013	M	92	PRJNA604975	SAMN18257745
OX-BSI-200_6	47e15372-7c9f-41be-a536-36c5e5cffd19	47e15372-7c9f-41be-a536-36c5e5cffd19_6	Plasmid	BSI	5716	42.37	ecoli	390	27	2	31	20	NA	NA	Col156_1	NA	MOBQ	-	-	mobilizable	-	-	1	NA	NA	NA	2018-04-05	healthcare associated 31-365d	K84013	M	92	PRJNA604975	SAMN18257745
OX-BSI-200_4	47e15372-7c9f-41be-a536-36c5e5cffd19	47e15372-7c9f-41be-a536-36c5e5cffd19_4	Plasmid	BSI	34642	41.37	ecoli	390	NA	NA	119	5	NA	NA	IncX4_2	triA-BAC0396,triC-BAC0398	MOBP	MPF_T	-	conjugative	PTU-X4	III	1	NA	NA	NA	2018-04-05	healthcare associated 31-365d	K84013	M	92	PRJNA604975	SAMN18257745
OX-BSI-200_3	47e15372-7c9f-41be-a536-36c5e5cffd19	47e15372-7c9f-41be-a536-36c5e5cffd19_3	Plasmid	BSI	83254	53.13	ecoli	390	NA	NA	7	58	NA	NA	IncB/O/K/Z_2	NA	MOBP	MPF_I	MOBP	conjugative	PTU-B/O/K/Z	III	1	NA	NA	NA	2018-04-05	healthcare associated 31-365d	K84013	M	92	PRJNA604975	SAMN18257745
OX-BSI-200_5	47e15372-7c9f-41be-a536-36c5e5cffd19	47e15372-7c9f-41be-a536-36c5e5cffd19_5	Plasmid	BSI	6077	49.05	ecoli	390	NA	NA	24	25	NA	NA	Col156_1	NA	MOBQ	-	-	mobilizable	PTU-E7	III	1	NA	NA	NA	2018-04-05	healthcare associated 31-365d	K84013	M	92	PRJNA604975	SAMN18257745
OX-BSI-200_1	47e15372-7c9f-41be-a536-36c5e5cffd19	47e15372-7c9f-41be-a536-36c5e5cffd19_chromo	Chromosome	BSI	5102938	50.73	ecoli	390	NA	NA	NA	NA	NA	IS100kyp,IS1397,IS200C,IS621,ISEc13,ISEc20,ISEc38,ISEc45,ISEc52	NA	acn-BAC0003,acrA-BAC0005,acrD/yffA-BAC0008,acrE/envC-BAC0009,acrF/envD-BAC0010,actP/yjcG-BAC0564,arsC-BAC0582,arsC-BAC0583,asr-BAC0038,baeS-BAC0040,bfrA-BAC0048,bhsA/ycfR/comC-BAC0049,comR/ycfQ-BAC0076,copA-BAC0725,corA-BAC0086,corB-BAC0643,corD-BAC0644,cpxA-BAC0532,cueO-BAC0103,cueR/ybbI-BAC0105,cusA/ybdE-BAC0107,cusB-BAC0108,cusC/ylcB-BAC0109,cusF/cusX-BAC0110,cusR/ylcA-BAC0111,cusS-BAC0112,cut…	NA	NA	NA	NA	NA	NA	NA	NA	NA	NA	2018-04-05	healthcare associated 31-365d	K84013	M	92	PRJNA604975	SAMN18257745
OX-BSI-200_2	47e15372-7c9f-41be-a536-36c5e5cffd19	47e15372-7c9f-41be-a536-36c5e5cffd19_2	Plasmid	BSI	131383	49.34	ecoli	390	NA	NA	2	100	NA	IS2,IS629,ISEc32	IncFIB(AP001918)_1	sitA-BAC0349,sitB-BAC0350,sitC-BAC0351,sitD-BAC0352,smdB-BAC0354,tupC-BAC0607	MOBF	MPF_F	MOBF	conjugative	PTU-FE	III	1	NA	NA	NA	2018-04-05	healthcare associated 31-365d	K84013	M	92	PRJNA604975	SAMN18257745
OX-BSI-200_8	47e15372-7c9f-41be-a536-36c5e5cffd19	47e15372-7c9f-41be-a536-36c5e5cffd19_8	Plasmid	BSI	5167	47.24	ecoli	390	NA	NA	4	69	NA	NA	Col156_1	NA	MOBQ	-	-	mobilizable	PTU-E7	III	1	NA	NA	NA	2018-04-05	healthcare associated 31-365d	K84013	M	92	PRJNA604975	SAMN18257745
OX-BSI-200_9	47e15372-7c9f-41be-a536-36c5e5cffd19	47e15372-7c9f-41be-a536-36c5e5cffd19_9	Plasmid	BSI	1604	49.88	ecoli	390	NA	NA	NA	NA	NA	NA	Col(MG828)_1	NA	-	-	MOBP	mobilizable	-	-	1	NA	NA	NA	2018-04-05	healthcare associated 31-365d	K84013	M	92	PRJNA604975	SAMN18257745
OX-BSI-201_2	481920da-a029-46f5-b5b9-def104b41f39_contig	481920da-a029-46f5-b5b9-def104b41f39_contig_2	Plasmid	BSI	145461	52.73	ecoli	69	NA	NA	1	123	aadA5,aph(3'')-Ib,aph(6)-Id,blaTEM-1,dfrA17,mph(A),qacEdelta1,sul1,sul2	IS100kyp,IS21,ISEc53	Col156_1,IncFIB(AP001918)_1,IncFII(29)_1_pUTI89	merA-BAC0652,merC-BAC0664,merD-BAC0666,merE-BAC0670,merP-BAC0678,merR-BAC0232,merT-BAC0693,qacEdelta1-BAC0323	MOBF,MOBP	MPF_F	-	conjugative	PTU-FE	III	0.6905	NA	NA	NA	NA	NA	NA	NA	NA	PRJNA604975	SAMN18257743
OX-BSI-201_1	481920da-a029-46f5-b5b9-def104b41f39_contig	481920da-a029-46f5-b5b9-def104b41f39_contig_chromo	Chromosome	BSI	5229836	50.65	ecoli	69	NA	NA	NA	NA	NA	IS1203,IS1A,IS1B,IS1F,IS2,IS30,IS4,IS911,ISEc22,ISEc43,ISEc45,ISEc46,ISEc8	NA	acn-BAC0003,acrA-BAC0005,acrB-BAC0006,acrD/yffA-BAC0008,acrE/envC-BAC0009,acrF/envD-BAC0010,actP/yjcG-BAC0564,arsA-BAC0571,arsB-BAC0576,arsC-BAC0582,arsC-BAC0583,arsD-BAC0587,arsP-BAC0036,arsR-BAC0594,asr-BAC0038,baeS-BAC0040,bfrA-BAC0048,bhsA/ycfR/comC-BAC0049,comR/ycfQ-BAC0076,copA-BAC0725,copS-BAC0752,corA-BAC0086,corB-BAC0643,corD-BAC0644,cpxA-BAC0532,cueO-BAC0103,cueR/ybbI-BAC0105,cusA/ybdE-…	NA	NA	NA	NA	NA	NA	NA	NA	NA	NA	NA	NA	NA	NA	NA	PRJNA604975	SAMN18257743
OX-BSI-202_1	4842da78-7fad-45e4-935b-8fa1ceeb1d92	4842da78-7fad-45e4-935b-8fa1ceeb1d92_chromo	Chromosome	BSI	4940780	50.72	ecoli	131	NA	NA	NA	NA	NA	IS1397,IS150,IS21,IS600,IS609,ISEc1,ISEc10,ISEc20,ISEc24,ISEc38,ISEc40,ISEc8,ISShdy2	NA	acn-BAC0003,acrA-BAC0005,acrD/yffA-BAC0008,acrE/envC-BAC0009,acrF/envD-BAC0010,actP/yjcG-BAC0564,arsC-BAC0582,arsC-BAC0583,asr-BAC0038,baeS-BAC0040,bfrA-BAC0048,bhsA/ycfR/comC-BAC0049,comR/ycfQ-BAC0076,copA-BAC0725,copR-BAC0753,corA-BAC0086,corB-BAC0643,corD-BAC0644,cpxA-BAC0532,cueO-BAC0103,cueR/ybbI-BAC0105,cusA/ybdE-BAC0107,cusB-BAC0108,cusC/ylcB-BAC0109,cusF/cusX-BAC0110,cusR/ylcA-BAC0111,cus…	NA	NA	NA	NA	NA	NA	NA	NA	NA	NA	2012-12-18	nosocomial	K84043	F	82	PRJNA604975	SAMN18257742
OX-BSI-202_2	4842da78-7fad-45e4-935b-8fa1ceeb1d92	4842da78-7fad-45e4-935b-8fa1ceeb1d92_2	Plasmid	BSI	147245	52.61	ecoli	131	NA	NA	1	123	aadA5,aph(3'')-Ib,aph(6)-Id,blaTEM-1,dfrA17,mph(A),qacEdelta1,sul1,sul2	IS100kyp,IS21,ISEc23,ISEc53	Col156_1,IncFIB(AP001918)_1,IncFII(29)_1_pUTI89	merA-BAC0652,merC-BAC0664,merD-BAC0666,merE-BAC0670,merP-BAC0678,merR-BAC0232,merT-BAC0693,qacEdelta1-BAC0323	MOBF,MOBP	MPF_F	MOBF	conjugative	PTU-FE	III	1	NA	NA	NA	2012-12-18	nosocomial	K84043	F	82	PRJNA604975	SAMN18257742
OX-BSI-203_1	4877b1e2-641a-4e3f-be9a-10f82ff477d5	4877b1e2-641a-4e3f-be9a-10f82ff477d5_chromo	Chromosome	BSI	5179453	50.4	ecoli	12	NA	NA	NA	NA	NA	IS1203,IS1F,IS200C,IS621,IS682,ISEc13,ISEc16,ISEc20,ISEc40,ISEc41,ISEc42,ISEc48,ISEc8,ISSd1,ISSen4	NA	acn-BAC0003,acrA-BAC0005,acrD/yffA-BAC0008,acrE/envC-BAC0009,acrF/envD-BAC0010,actP/yjcG-BAC0564,arsC-BAC0582,arsC-BAC0583,asr-BAC0038,baeS-BAC0040,bfrA-BAC0048,bhsA/ycfR/comC-BAC0049,comR/ycfQ-BAC0076,copA-BAC0725,copS-BAC0752,corA-BAC0086,corB-BAC0643,corD-BAC0644,cpxA-BAC0532,cueO-BAC0103,cueR/ybbI-BAC0105,cusA/ybdE-BAC0107,cusB-BAC0108,cusC/ylcB-BAC0109,cusF/cusX-BAC0110,cusR/ylcA-BAC0111,cus…	NA	NA	NA	NA	NA	NA	NA	NA	NA	NA	2012-02-10	nosocomial	K84058	M	88	PRJNA604975	SAMN14345063
OX-BSI-203_2	4877b1e2-641a-4e3f-be9a-10f82ff477d5	4877b1e2-641a-4e3f-be9a-10f82ff477d5_2	Plasmid	BSI	122358	51.72	ecoli	12	NA	NA	15	38	aadA1,blaSHV-1,qacEdelta1,sul1,tet(D)	IS1R,ISEc10,ISKpn26	Col156_1,IncFIB(AP001918)_1,IncFIC(FII)_1	norA-BAC0282,qacEdelta1-BAC0323	MOBF,MOBP	MPF_F	MOBF	conjugative	PTU-FE	III	0.6845	NA	NA	NA	2012-02-10	nosocomial	K84058	M	88	PRJNA604975	SAMN14345063
OX-BSI-204_5	49010bb8-4ff5-4a0f-ae13-34104782903a	49010bb8-4ff5-4a0f-ae13-34104782903a_5	Plasmid	BSI	9553	51.74	kpneumoniae	490	5	32	18	34	NA	Tn5403	NA	NA	MOBP	-	-	mobilizable	-	-	1	NA	NA	NA	2011-04-20	healthcare associated 0-30d	K84072	F	81	PRJNA604975	SAMN14345062
OX-BSI-204_8	49010bb8-4ff5-4a0f-ae13-34104782903a	49010bb8-4ff5-4a0f-ae13-34104782903a_8	Plasmid	BSI	4504	40.54	kpneumoniae	490	NA	NA	196	3	NA	NA	ColRNAI_1	NA	-	-	-	non-mobilizable	PTU-E71	III	1	NA	NA	NA	2011-04-20	healthcare associated 0-30d	K84072	F	81	PRJNA604975	SAMN14345062
OX-BSI-204_3	49010bb8-4ff5-4a0f-ae13-34104782903a	49010bb8-4ff5-4a0f-ae13-34104782903a_3	Plasmid	BSI	140168	52.85	kpneumoniae	490	14	15	13	41	aac(3)-IIe,aac(6')-Ib-cr5,aph(3'')-Ib,aph(6)-Id,blaCTX-M-15,blaOXA-1,blaTEM-1,catB3,dfrA14,qnrB1,sul2,tet(A)	IS102,IS5075,IS6100,ISEc9,ISKpn11,Tn5403	IncFII_1_pKP91	blt-BAC0050	MOBF,MOBF	MPF_F	-	conjugative	PTU-FK	III	0.9922	NA	NA	NA	2011-04-20	healthcare associated 0-30d	K84072	F	81	PRJNA604975	SAMN14345062
OX-BSI-204_1	49010bb8-4ff5-4a0f-ae13-34104782903a	49010bb8-4ff5-4a0f-ae13-34104782903a_chromo	Chromosome	BSI	5410802	57.36	kpneumoniae	490	NA	NA	NA	NA	blaSHV-1,fosA,oqxA,oqxB	IS5075,Tn5403	NA	acn-BAC0003,acrA-BAC0005,acrB-BAC0006,acrC-BAC0007,acrD-BAC0563,acrE/envC-BAC0009,acrF/envD-BAC0010,actP/yjcG-BAC0564,adeE-BAC0013,arsB-BAC0578,arsC-BAC0582,arsC-BAC0583,arsR-BAC0589,baeR-BAC0596,baeS-BAC0040,bepG-BAC0046,bfrA-BAC0048,bhsA/ycfR/comC-BAC0049,cepA-BAC0061,comR/ycfQ-BAC0076,copA-BAC0725,corA-BAC0086,corB-BAC0643,corD-BAC0644,corR-BAC0089,cpxA-BAC0532,cueR/ybbI-BAC0105,cusA/ybdE-BAC0…	NA	NA	NA	NA	NA	NA	NA	NA	NA	NA	2011-04-20	healthcare associated 0-30d	K84072	F	81	PRJNA604975	SAMN14345062
OX-BSI-204_7	49010bb8-4ff5-4a0f-ae13-34104782903a	49010bb8-4ff5-4a0f-ae13-34104782903a_7	Plasmid	BSI	5366	52.4	kpneumoniae	490	NA	NA	83	7	NA	NA	NA	NA	-	-	-	non-mobilizable	-	-	1	NA	NA	NA	2011-04-20	healthcare associated 0-30d	K84072	F	81	PRJNA604975	SAMN14345062
OX-BSI-204_6	49010bb8-4ff5-4a0f-ae13-34104782903a	49010bb8-4ff5-4a0f-ae13-34104782903a_6	Plasmid	BSI	9057	47.49	kpneumoniae	490	NA	NA	114	5	NA	Tn5403	Col440I_1	NA	-	-	-	non-mobilizable	-	-	1	NA	NA	NA	2011-04-20	healthcare associated 0-30d	K84072	F	81	PRJNA604975	SAMN14345062
OX-BSI-204_4	49010bb8-4ff5-4a0f-ae13-34104782903a	49010bb8-4ff5-4a0f-ae13-34104782903a_4	Plasmid	BSI	15409	45.55	kpneumoniae	490	3	19	20	32	NA	IS102,IS1X4,ISSen4	IncFIA(HI1)_1_HI1	NA	-	-	MOBF	mobilizable	-	-	1	NA	NA	NA	2011-04-20	healthcare associated 0-30d	K84072	F	81	PRJNA604975	SAMN14345062
OX-BSI-204_2	49010bb8-4ff5-4a0f-ae13-34104782903a	49010bb8-4ff5-4a0f-ae13-34104782903a_2	Plasmid	BSI	224365	51.11	kpneumoniae	490	NA	NA	19	33	NA	IS1A,IS1X4,IS903,ISEc21,ISEc36,ISKox1,ISKpn2,ISKpn21,ISKpn24,ISSen3	IncFIB(K)_1_Kpn3	copG-BAC0717,fecE-BAC0164,pcoA-BAC0303,pcoB-BAC0304,pcoC-BAC0305,pcoD-BAC0306,pcoE-BAC0307,pcoR-BAC0308,pcoS-BAC0309,pstB-BAC0316,silA-BAC0341,silB-BAC0342,silC-BAC0343,silE-BAC0344,silF-BAC0345,silP-BAC0346,silR-BAC0347,silS-BAC0348	-	-	-	non-mobilizable	PTU-E35	I	1	NA	NA	NA	2011-04-20	healthcare associated 0-30d	K84072	F	81	PRJNA604975	SAMN14345062
OX-BSI-205_2	490ceb2b-a6c4-42f3-a02a-2fc48981fc12	490ceb2b-a6c4-42f3-a02a-2fc48981fc12_2	Plasmid	BSI	119570	50.77	ecoli	95	NA	NA	1	123	blaTEM	IS100kyp,IS1R,IS21,ISEc23,ISEc53	Col156_1,IncFIB(AP001918)_1,IncFII(29)_1_pUTI89	NA	MOBF,MOBP	MPF_F	MOBF	conjugative	PTU-FE	III	1	NA	NA	NA	2012-10-13	healthcare associated 31-365d	K84017	M	70	PRJNA604975	SAMN14345061
OX-BSI-205_1	490ceb2b-a6c4-42f3-a02a-2fc48981fc12	490ceb2b-a6c4-42f3-a02a-2fc48981fc12_chromo	Chromosome	BSI	5137835	50.55	ecoli	95	NA	NA	NA	NA	aadA1,dfrA1,sat2	IS100kyp,IS1203,IS1397,IS200C,IS621,ISEc20,ISEc30,ISEc38,ISEc40,ISEc45,ISEc48,ISEc8	NA	acn-BAC0003,acrA-BAC0005,acrD/yffA-BAC0008,acrE/envC-BAC0009,acrF/envD-BAC0010,actP/yjcG-BAC0564,arsC-BAC0582,arsC-BAC0583,asr-BAC0038,baeS-BAC0040,bfrA-BAC0048,bhsA/ycfR/comC-BAC0049,comR/ycfQ-BAC0076,copA-BAC0725,corA-BAC0086,corB-BAC0643,corD-BAC0644,cpxA-BAC0532,cueO-BAC0103,cueR/ybbI-BAC0105,cusA/ybdE-BAC0107,cusB-BAC0108,cusC/ylcB-BAC0109,cusF/cusX-BAC0110,cusR/ylcA-BAC0111,cusS-BAC0112,cut…	NA	NA	NA	NA	NA	NA	NA	NA	NA	NA	2012-10-13	healthcare associated 31-365d	K84017	M	70	PRJNA604975	SAMN14345061
OX-BSI-206_1	49192a11-203d-4844-a506-94648b9230c8	49192a11-203d-4844-a506-94648b9230c8_chromo	Chromosome	BSI	5168842	50.44	ecoli	12	NA	NA	NA	NA	NA	IS1203,IS1F,IS200C,IS621,IS682,ISEc13,ISEc16,ISEc20,ISEc40,ISEc41,ISEc42,ISEc48,ISEc8,ISSd1,ISSen4	NA	acn-BAC0003,acrA-BAC0005,acrD/yffA-BAC0008,acrE/envC-BAC0009,acrF/envD-BAC0010,actP/yjcG-BAC0564,arsC-BAC0582,arsC-BAC0583,asr-BAC0038,baeS-BAC0040,bfrA-BAC0048,bhsA/ycfR/comC-BAC0049,comR/ycfQ-BAC0076,copA-BAC0725,copS-BAC0752,corA-BAC0086,corB-BAC0643,corD-BAC0644,cpxA-BAC0532,cueO-BAC0103,cueR/ybbI-BAC0105,cusA/ybdE-BAC0107,cusB-BAC0108,cusC/ylcB-BAC0109,cusF/cusX-BAC0110,cusR/ylcA-BAC0111,cus…	NA	NA	NA	NA	NA	NA	NA	NA	NA	NA	2018-01-14	community	K82067	M	69	PRJNA604975	SAMN18257739
OX-BSI-206_2	49192a11-203d-4844-a506-94648b9230c8	49192a11-203d-4844-a506-94648b9230c8_2	Plasmid	BSI	126733	51.85	ecoli	12	NA	NA	15	38	aadA1,blaSHV-1,qacEdelta1,sul1,tet(D)	IS1R,ISEc10,ISKpn26	Col156_1,IncFIB(AP001918)_1,IncFIC(FII)_1	qacEdelta1-BAC0323	MOBF,MOBP	MPF_F	MOBF	conjugative	PTU-FE	III	1	NA	NA	NA	2018-01-14	community	K82067	M	69	PRJNA604975	SAMN18257739
OX-BSI-207_1	4993cdee-578c-4a59-81af-223c38fd0b52	4993cdee-578c-4a59-81af-223c38fd0b52_chromo	Chromosome	BSI	5082712	50.56	ecoli	131	NA	NA	NA	NA	blaCTX-M-27	IS1203,IS1397,IS150,IS600,IS609,IS682,ISEc1,ISEc10,ISEc16,ISEc20,ISEc38,ISEc40,ISEc8,ISShdy2	NA	acn-BAC0003,acrA-BAC0005,acrD/yffA-BAC0008,acrE/envC-BAC0009,acrF/envD-BAC0010,actP/yjcG-BAC0564,arsC-BAC0582,arsC-BAC0583,asr-BAC0038,baeS-BAC0040,bfrA-BAC0048,bhsA/ycfR/comC-BAC0049,comR/ycfQ-BAC0076,copA-BAC0725,corA-BAC0086,corB-BAC0643,corD-BAC0644,cpxA-BAC0532,cueO-BAC0103,cueR/ybbI-BAC0105,cusA/ybdE-BAC0107,cusB-BAC0108,cusC/ylcB-BAC0109,cusF/cusX-BAC0110,cusR/ylcA-BAC0111,cusS-BAC0112,cut…	NA	NA	NA	NA	NA	NA	NA	NA	NA	NA	2017-07-30	community	K84618	M	64	PRJNA604975	SAMN18257735
OX-BSI-207_2	4993cdee-578c-4a59-81af-223c38fd0b52	4993cdee-578c-4a59-81af-223c38fd0b52_2	Plasmid	BSI	146710	51.83	ecoli	131	NA	NA	1	123	aac(3)-IId,aadA5,aph(3'')-Ib,aph(6)-Id,blaTEM-1,dfrA17,mph(A),qacEdelta1,sul1,sul2,tet(A)	IS100kyp,IS1R,IS21,IS26,IS6100,ISEc23,ISEc53,ISVsa5	Col156_1,IncFIB(AP001918)_1,IncFII(29)_1_pUTI89	blt-BAC0050,qacEdelta1-BAC0323	MOBF,MOBP	MPF_F	MOBF	conjugative	PTU-FE	III	0.9941	NA	NA	NA	2017-07-30	community	K84618	M	64	PRJNA604975	SAMN18257735
OX-BSI-208_1	49957fa3-b570-4943-a250-f4dc5a030055_contig	49957fa3-b570-4943-a250-f4dc5a030055_contig_chromo	Chromosome	BSI	5229986	50.54	ecoli	73	NA	NA	NA	NA	blaEC-5	IS100kyp,IS1203,IS1F,IS2,IS200C,IS30,IS4,IS630,ISEc13,ISEc16,ISEc20,ISEc22,ISEc39,ISEc40,ISEc41,ISEc42,ISEc43,ISEc8,ISSd1	NA	acn-BAC0003,acrA-BAC0005,acrD/yffA-BAC0008,acrE/envC-BAC0009,acrF/envD-BAC0010,actP/yjcG-BAC0564,arsC-BAC0582,arsC-BAC0583,asr-BAC0038,baeS-BAC0040,bfrA-BAC0048,bhsA/ycfR/comC-BAC0049,comR/ycfQ-BAC0076,copA-BAC0725,corA-BAC0086,corB-BAC0643,corD-BAC0644,cpxA-BAC0532,cueO-BAC0103,cueR/ybbI-BAC0105,cusA/ybdE-BAC0107,cusB-BAC0108,cusC/ylcB-BAC0109,cusF/cusX-BAC0110,cusR/ylcA-BAC0111,cusS-BAC0112,cut…	NA	NA	NA	NA	NA	NA	NA	NA	NA	NA	NA	NA	NA	NA	NA	PRJNA604975	SAMN18257734
OX-BSI-208_2	49957fa3-b570-4943-a250-f4dc5a030055_contig	49957fa3-b570-4943-a250-f4dc5a030055_contig_2	Plasmid	BSI	97617	47.77	ecoli	73	NA	NA	121	5	NA	ISEc52	IncY_1	NA	-	-	-	non-mobilizable	PTU-Y	III	1	NA	NA	NA	NA	NA	NA	NA	NA	PRJNA604975	SAMN18257734
OX-BSI-208_4	49957fa3-b570-4943-a250-f4dc5a030055_contig	49957fa3-b570-4943-a250-f4dc5a030055_contig_4	Plasmid	BSI	58280	40.99	ecoli	73	NA	NA	191	3	blaTEM,blaTEM-1	NA	NA	NA	-	-	-	non-mobilizable	-	-	1	NA	NA	NA	NA	NA	NA	NA	NA	PRJNA604975	SAMN18257734
OX-BSI-208_3	49957fa3-b570-4943-a250-f4dc5a030055_contig	49957fa3-b570-4943-a250-f4dc5a030055_contig_3	Plasmid	BSI	116890	50.87	ecoli	73	16	2	1	123	NA	IS100kyp,IS21,IS26,ISEc10,ISEc53	Col156_1,IncFIB(AP001918)_1,IncFII(29)_1_pUTI89	NA	MOBF,MOBP	MPF_F	MOBF	conjugative	PTU-FE	III	0.6905	NA	NA	NA	NA	NA	NA	NA	NA	PRJNA604975	SAMN18257734
OX-BSI-209_4	4a04f034-246b-4c0c-9969-0eb4fad52b30	4a04f034-246b-4c0c-9969-0eb4fad52b30_4	Plasmid	BSI	5093	48.73	ecoli	80	NA	NA	NA	NA	NA	NA	Col8282_1	NA	MOBQ	-	MOBQ,MOBQ	mobilizable	PTU-E10	III	1	NA	NA	NA	2009-11-09	nosocomial	K84013	F	62	PRJNA604975	SAMN18257732
OX-BSI-209_3	4a04f034-246b-4c0c-9969-0eb4fad52b30	4a04f034-246b-4c0c-9969-0eb4fad52b30_3	Plasmid	BSI	6860	49.29	ecoli	80	NA	NA	138	4	NA	NA	ColRNAI_1	NA	MOBP	-	MOBP	mobilizable	PTU-E1	III	0.9583	NA	NA	NA	2009-11-09	nosocomial	K84013	F	62	PRJNA604975	SAMN18257732
OX-BSI-209_1	4a04f034-246b-4c0c-9969-0eb4fad52b30	4a04f034-246b-4c0c-9969-0eb4fad52b30_chromo	Chromosome	BSI	5253399	50.28	ecoli	80	NA	NA	NA	NA	blaEC-5	IS100kyp,IS1203,IS1397,IS1F,IS621,IS630,IS682,ISEc13,ISEc16,ISEc17,ISEc20,ISEc39,ISEc42,ISEc48	NA	acn-BAC0003,acrA-BAC0005,acrD/yffA-BAC0008,acrE/envC-BAC0009,acrF/envD-BAC0010,actP/yjcG-BAC0564,arsC-BAC0582,arsC-BAC0583,asr-BAC0038,baeS-BAC0040,bfrA-BAC0048,bhsA/ycfR/comC-BAC0049,comR/ycfQ-BAC0076,copA-BAC0725,corA-BAC0086,corB-BAC0643,corD-BAC0644,cpxA-BAC0532,cueO-BAC0103,cueR/ybbI-BAC0105,cusA/ybdE-BAC0107,cusB-BAC0108,cusC/ylcB-BAC0109,cusF/cusX-BAC0110,cusR/ylcA-BAC0111,cusS-BAC0112,cut…	NA	NA	NA	NA	NA	NA	NA	NA	NA	NA	2009-11-09	nosocomial	K84013	F	62	PRJNA604975	SAMN18257732
OX-BSI-209_2	4a04f034-246b-4c0c-9969-0eb4fad52b30	4a04f034-246b-4c0c-9969-0eb4fad52b30_2	Plasmid	BSI	8274	47.09	ecoli	80	NA	NA	86	7	blaTEM-1	NA	ColRNAI_1	NA	MOBF	-	MOB_unknown	mobilizable	-	-	1	NA	NA	NA	2009-11-09	nosocomial	K84013	F	62	PRJNA604975	SAMN18257732
OX-BSI-210_1	4ae34efb-6951-4cb2-bb87-aa847fbee3ec	4ae34efb-6951-4cb2-bb87-aa847fbee3ec_chromo	Chromosome	BSI	4760776	50.86	ecoli	1081	NA	NA	NA	NA	NA	IS3,ISSen1	NA	acn-BAC0003,acrA-BAC0005,acrB-BAC0006,acrD/yffA-BAC0008,acrE/envC-BAC0009,acrF/envD-BAC0010,actP/yjcG-BAC0564,arsB-BAC0576,arsC-BAC0583,arsC-BAC0584,arsP-BAC0036,arsR-BAC0594,asr-BAC0038,baeS-BAC0040,bfrA-BAC0048,bhsA/ycfR/comC-BAC0049,comR/ycfQ-BAC0076,copA-BAC0725,copS-BAC0752,corA-BAC0086,corB-BAC0643,corD-BAC0644,cpxA-BAC0532,cueO-BAC0103,cueR/ybbI-BAC0105,cusA/ybdE-BAC0107,cusB-BAC0108,cusC/…	NA	NA	NA	NA	NA	NA	NA	NA	NA	NA	2009-04-05	nosocomial	K84019	M	87	PRJNA604975	NA
OX-BSI-210_2	4ae34efb-6951-4cb2-bb87-aa847fbee3ec	4ae34efb-6951-4cb2-bb87-aa847fbee3ec_2	Plasmid	BSI	57002	52.12	ecoli	1081	NA	NA	63	10	NA	IS4321R	IncN_1	chrA-BAC0026,chrB-BAC0027,ncrA-BAC0263,ncrB-BAC0264,ncrC-BAC0265,ncrY-BAC0266,triC-BAC0398	MOBF	MPF_T	MOBF	conjugative	PTU-N1	IV	1	NA	NA	NA	2009-04-05	nosocomial	K84019	M	87	PRJNA604975	NA
OX-BSI-211_2	4afe0a7c-cacd-40b9-9733-85295590ee16	4afe0a7c-cacd-40b9-9733-85295590ee16_2	Plasmid	BSI	173798	51.63	ecoli	617	NA	NA	30	21	aac(3)-IId,aac(6')-Ib-cr5,aadA5,blaCTX-M-15,blaOXA-1,blaTEM-1,catA1,catB3,dfrA17,mph(A),qacEdelta1,sul1,tet(B)	IS100kyp,IS150,IS6100,ISCro1,ISEc12,ISEc22,ISEc9,ISSm1	IncFIA_1,IncFIB(AP001918)_1,IncFIC(FII)_1	blt-BAC0050,qacEdelta1-BAC0323,sitA-BAC0349,sitB-BAC0350,sitC-BAC0351,sitD-BAC0352	MOBF	MPF_F	MOBF	conjugative	PTU-FE	III	1	NA	NA	NA	NA	NA	NA	NA	NA	PRJNA604975	NA
OX-BSI-211_3	4afe0a7c-cacd-40b9-9733-85295590ee16	4afe0a7c-cacd-40b9-9733-85295590ee16_3	Plasmid	BSI	34416	41.85	ecoli	617	NA	NA	43	14	NA	IS3411	IncX4_1	triA-BAC0396,triC-BAC0398	MOBP	MPF_T	-	conjugative	PTU-X4	III	1	NA	NA	NA	NA	NA	NA	NA	NA	PRJNA604975	NA
OX-BSI-211_1	4afe0a7c-cacd-40b9-9733-85295590ee16	4afe0a7c-cacd-40b9-9733-85295590ee16_chromo	Chromosome	BSI	4871046	50.72	ecoli	617	NA	NA	NA	NA	NA	IS200C,IS30,IS4,IS5,IS911,ISEc22,ISEc26,ISEc35,ISEc38,ISEc5,ISEc8	NA	acn-BAC0003,acrA-BAC0005,acrB-BAC0006,acrD/yffA-BAC0008,acrE/envC-BAC0009,acrF/envD-BAC0010,actP/yjcG-BAC0564,arsB-BAC0576,arsC-BAC0583,arsC-BAC0584,arsR-BAC0594,asr-BAC0038,baeS-BAC0040,bfrA-BAC0048,bhsA/ycfR/comC-BAC0049,comR/ycfQ-BAC0076,copA-BAC0725,copS-BAC0752,corA-BAC0086,corB-BAC0643,corD-BAC0644,cpxA-BAC0532,cueO-BAC0103,cueR/ybbI-BAC0105,cusA/ybdE-BAC0107,cusB-BAC0108,cusC/ylcB-BAC0109,…	NA	NA	NA	NA	NA	NA	NA	NA	NA	NA	NA	NA	NA	NA	NA	PRJNA604975	NA
OX-BSI-212_2	4b38d4a0-3df3-4598-9397-43a9570c2cb5	4b38d4a0-3df3-4598-9397-43a9570c2cb5_2	Plasmid	BSI	232701	52.7	kpneumoniae	278	NA	NA	NA	NA	NA	IS102,IS1F,IS1X4,ISEc15,ISEc52,ISEcl1,ISKpn26,ISKpn28,ISKpn8,ISPa16,ISSen4	IncFIB(K)_1_Kpn3	arsB-BAC0577,arsB-BAC0578,arsC-BAC0582,arsC-BAC0584,arsH-BAC0034,arsR-BAC0591,cepA-BAC0061,copG-BAC0717,fecE-BAC0164,nikA-BAC0270,nikE-BAC0274,pcoA-BAC0303,pcoB-BAC0304,pcoC-BAC0305,pcoD-BAC0306,pcoE-BAC0307,pcoR-BAC0308,pcoS-BAC0309,silA-BAC0341,silB-BAC0342,silC-BAC0343,silE-BAC0344,silF-BAC0345,silP-BAC0346,silR-BAC0347,silS-BAC0348,sugE-BAC0378	MOBF,MOBF	MPF_F	-	conjugative	PTU-FK	III	0.9766	NA	NA	NA	2018-08-07	healthcare associated 31-365d	K84046	M	85	PRJNA604975	NA
OX-BSI-212_1	4b38d4a0-3df3-4598-9397-43a9570c2cb5	4b38d4a0-3df3-4598-9397-43a9570c2cb5_chromo	Chromosome	BSI	5363204	57.33	kpneumoniae	278	NA	NA	NA	NA	blaSHV-27,fosA,oqxA,oqxB	IS2,ISEc36,ISKpn2,ISKpn8,ISSty2	NA	acn-BAC0003,acrA-BAC0005,acrB-BAC0006,acrC-BAC0007,acrD-BAC0563,acrE/envC-BAC0009,acrF/envD-BAC0010,actP/yjcG-BAC0564,adeE-BAC0013,arsB-BAC0578,arsC-BAC0582,arsC-BAC0583,arsR-BAC0589,baeR-BAC0596,baeS-BAC0040,bfrA-BAC0048,bhsA/ycfR/comC-BAC0049,cepA-BAC0061,chrA-BAC0026,chrB-BAC0027,comR/ycfQ-BAC0076,copA-BAC0725,corA-BAC0086,corB-BAC0643,corD-BAC0644,corR-BAC0089,cpxA-BAC0532,cueR/ybbI-BAC0105,c…	NA	NA	NA	NA	NA	NA	NA	NA	NA	NA	2018-08-07	healthcare associated 31-365d	K84046	M	85	PRJNA604975	NA
OX-BSI-213_1	4be0c66e-89f3-4eeb-9950-8703b923c75a	4be0c66e-89f3-4eeb-9950-8703b923c75a_chromo	Chromosome	BSI	5268149	57.56	kpneumoniae	-	NA	NA	NA	NA	blaSHV-187,fosA,oqxA,oqxB	IS1351,ISKpn1	NA	acn-BAC0003,acrA-BAC0005,acrB-BAC0006,acrC-BAC0007,acrD-BAC0563,acrE/envC-BAC0009,acrF/envD-BAC0010,actP/yjcG-BAC0564,adeE-BAC0013,arsB-BAC0578,arsC-BAC0582,arsC-BAC0583,arsR-BAC0589,baeR-BAC0596,baeS-BAC0040,bepG-BAC0046,bfrA-BAC0048,bhsA/ycfR/comC-BAC0049,cepA-BAC0061,comR/ycfQ-BAC0076,copA-BAC0725,corA-BAC0086,corB-BAC0643,corD-BAC0644,corR-BAC0089,cpxA-BAC0532,cueR/ybbI-BAC0105,cusA/ybdE-BAC0…	NA	NA	NA	NA	NA	NA	NA	NA	NA	NA	2018-11-13	healthcare associated 31-365d	K84032	M	49	PRJNA604975	NA
OX-BSI-214_2	4c3e21df-0349-4b61-a520-d3e909e920fb	4c3e21df-0349-4b61-a520-d3e909e920fb_2	Plasmid	BSI	214183	49.66	kpneumoniae	218	NA	NA	78	8	NA	IS100kyp,IS1A,IS1N,ISKox1,ISSpu2	IncFIB(K)_1_Kpn3	copG-BAC0717,fecD-BAC0163,fecE-BAC0164,nikD-BAC0273,pbrA-BAC0298,pbrB/pbrC-BAC0299,pbrR-BAC0301,pcoA-BAC0303,pcoB-BAC0304,pcoC-BAC0305,pcoD-BAC0306,pcoR-BAC0308,pcoS-BAC0309,silA-BAC0341,silB-BAC0342,silC-BAC0343,silE-BAC0344,silF-BAC0345,silP-BAC0346,silR-BAC0347,silS-BAC0348,smdB-BAC0354,terA-BAC0386,terB-BAC0387,terC-BAC0388,terE-BAC0390,terW-BAC0391,terZ-BAC0392,ybtQ-BAC0433	-	-	-	non-mobilizable	PTU-E21	I	1	NA	NA	NA	2018-04-04	nosocomial	K84011	M	89	PRJNA604975	NA
OX-BSI-214_1	4c3e21df-0349-4b61-a520-d3e909e920fb	4c3e21df-0349-4b61-a520-d3e909e920fb_chromo	Chromosome	BSI	5147963	57.6	kpneumoniae	218	NA	NA	NA	NA	blaSHV-1,fosA,oqxA,oqxB25	IS1400,IS1A	NA	acn-BAC0003,acrA-BAC0005,acrB-BAC0006,acrC-BAC0007,acrD-BAC0563,acrE/envC-BAC0009,acrF/envD-BAC0010,adeE-BAC0013,arsC-BAC0583,baeR-BAC0596,baeS-BAC0040,bepG-BAC0046,bfrA-BAC0048,bhsA/ycfR/comC-BAC0049,cepA-BAC0061,comR/ycfQ-BAC0076,copA-BAC0725,corA-BAC0086,corB-BAC0643,corD-BAC0644,corR-BAC0089,cpxA-BAC0532,cueR/ybbI-BAC0105,cusA/ybdE-BAC0107,cusB-BAC0108,cusC/ylcB-BAC0109,cusF/cusX-BAC0110,cusR…	NA	NA	NA	NA	NA	NA	NA	NA	NA	NA	2018-04-04	nosocomial	K84011	M	89	PRJNA604975	NA
OX-BSI-215_1	4c6f0b7a-a4f1-47d3-8b3a-100a530c24c5	4c6f0b7a-a4f1-47d3-8b3a-100a530c24c5_chromo	Chromosome	BSI	5243711	57.56	kpneumoniae	34	NA	NA	NA	NA	blaSHV-26,fosA,oqxA10,oqxB	IS1351,ISKpn26,ISKpn28,ISSty2	NA	acn-BAC0003,acrA-BAC0005,acrB-BAC0006,acrC-BAC0007,acrD-BAC0563,acrE/envC-BAC0009,acrF/envD-BAC0010,actP/yjcG-BAC0564,adeE-BAC0013,arsB-BAC0578,arsC-BAC0582,arsC-BAC0583,arsR-BAC0589,baeR-BAC0596,baeS-BAC0040,bepG-BAC0046,bfrA-BAC0048,bhsA/ycfR/comC-BAC0049,cepA-BAC0061,comR/ycfQ-BAC0076,copA-BAC0725,corA-BAC0086,corB-BAC0643,corD-BAC0644,corR-BAC0089,cpxA-BAC0532,cueR/ybbI-BAC0105,cusA/ybdE-BAC0…	NA	NA	NA	NA	NA	NA	NA	NA	NA	NA	2018-11-23	nosocomial	K84009	M	64	PRJNA604975	NA
OX-BSI-215_5	4c6f0b7a-a4f1-47d3-8b3a-100a530c24c5	4c6f0b7a-a4f1-47d3-8b3a-100a530c24c5_5	Plasmid	BSI	3223	56.28	kpneumoniae	34	NA	NA	62	10	NA	NA	Col440II_1,ColRNAI_1	emrE/mvrC-BAC0150	MOBP	-	MOB_unknown	mobilizable	PTU-E3	V	0.8228	NA	NA	NA	2018-11-23	nosocomial	K84009	M	64	PRJNA604975	NA
OX-BSI-215_4	4c6f0b7a-a4f1-47d3-8b3a-100a530c24c5	4c6f0b7a-a4f1-47d3-8b3a-100a530c24c5_4	Plasmid	BSI	5481	50.19	kpneumoniae	34	NA	NA	NA	NA	NA	NA	NA	NA	-	-	-	non-mobilizable	-	-	1	NA	NA	NA	2018-11-23	nosocomial	K84009	M	64	PRJNA604975	NA
OX-BSI-215_2	4c6f0b7a-a4f1-47d3-8b3a-100a530c24c5	4c6f0b7a-a4f1-47d3-8b3a-100a530c24c5_2	Plasmid	BSI	141309	51.87	kpneumoniae	34	NA	NA	101	6	NA	IS1F,IS1X2,IS1X4,IS903B,ISEc8,ISKpn24	IncFIB(K)_1_Kpn3	arsA-BAC0030,arsB-BAC0577,arsB-BAC0578,arsC-BAC0583,arsC-BAC0584,arsD-BAC0587,arsR-BAC0591,copG-BAC0717,fecE-BAC0164,nikB-BAC0271,nikC-BAC0272,nikD-BAC0273,pcoA-BAC0303,pcoB-BAC0304,pcoC-BAC0305,pcoD-BAC0306,pcoE-BAC0307,pcoR-BAC0308,pcoS-BAC0309,silA-BAC0341,silB-BAC0342,silC-BAC0343,silE-BAC0344,silF-BAC0345,silP-BAC0346,silR-BAC0347,silS-BAC0348	-	-	-	non-mobilizable	-	-	1	NA	NA	NA	2018-11-23	nosocomial	K84009	M	64	PRJNA604975	NA
OX-BSI-215_3	4c6f0b7a-a4f1-47d3-8b3a-100a530c24c5	4c6f0b7a-a4f1-47d3-8b3a-100a530c24c5_3	Plasmid	BSI	106765	53.05	kpneumoniae	34	NA	NA	NA	NA	NA	IS4321R,ISKpn24,ISKpn28,Tn5403	IncFIA(HI1)_1_HI1,IncFII_1_pKP91	chrA-BAC0026,chrB-BAC0027,ncrA-BAC0263,ncrB-BAC0264,ncrC-BAC0265,ncrY-BAC0266	MOBF,MOBF	MPF_F	-	conjugative	-	-	1	NA	NA	NA	2018-11-23	nosocomial	K84009	M	64	PRJNA604975	NA
OX-BSI-216_1	4c98e400-f38a-4cd4-8e06-d01d915a12bc	4c98e400-f38a-4cd4-8e06-d01d915a12bc_chromo	Chromosome	BSI	5316550	57.44	kpneumoniae	86	NA	NA	NA	NA	blaSHV-1,fosA10,oqxA11,oqxB19	ISSty2	NA	acn-BAC0003,acrA-BAC0005,acrB-BAC0006,acrC-BAC0007,acrD-BAC0563,acrE/envC-BAC0009,acrF/envD-BAC0010,actP/yjcG-BAC0564,adeE-BAC0013,arsB-BAC0578,arsC-BAC0582,arsC-BAC0583,arsR-BAC0589,baeR-BAC0596,baeS-BAC0040,bepG-BAC0046,bfrA-BAC0048,bhsA/ycfR/comC-BAC0049,cepA-BAC0061,comR/ycfQ-BAC0076,copA-BAC0725,corA-BAC0086,corB-BAC0643,corD-BAC0644,corR-BAC0089,cpxA-BAC0532,cueR/ybbI-BAC0105,cusA/ybdE-BAC0…	NA	NA	NA	NA	NA	NA	NA	NA	NA	NA	2017-08-17	nosocomial	K81040	M	36	PRJNA604975	NA
OX-BSI-216_2	4c98e400-f38a-4cd4-8e06-d01d915a12bc	4c98e400-f38a-4cd4-8e06-d01d915a12bc_2	Plasmid	BSI	216711	50.48	kpneumoniae	86	17	2	78	8	NA	IS100kyp,IS1N,IS903B,ISKox1,ISSpu2	IncFIB(K)_1_Kpn3,IncHI1B_1_pNDM-MAR	copG-BAC0717,fecD-BAC0163,fecE-BAC0164,nikD-BAC0273,nikE-BAC0274,pbrA-BAC0298,pbrB/pbrC-BAC0299,pbrR-BAC0301,pcoA-BAC0303,pcoB-BAC0304,pcoC-BAC0305,pcoD-BAC0306,pcoR-BAC0308,pcoS-BAC0309,silA-BAC0341,silB-BAC0342,silC-BAC0343,silE-BAC0344,silF-BAC0345,silP-BAC0346,silR-BAC0347,silS-BAC0348,smdB-BAC0354,terA-BAC0386,terB-BAC0387,terC-BAC0388,terE-BAC0390,terW-BAC0391,terZ-BAC0392,ybtQ-BAC0433	-	-	-	non-mobilizable	PTU-E21	I	1	NA	NA	NA	2017-08-17	nosocomial	K81040	M	36	PRJNA604975	NA
OX-BSI-217_1	4d2e1ae9-8383-4b49-8eef-0d508a0acb79	4d2e1ae9-8383-4b49-8eef-0d508a0acb79_chromo	Chromosome	BSI	4946248	50.61	ecoli	95	NA	NA	NA	NA	NA	IS100kyp,IS1397,IS200C,IS621,ISEc20,ISEc30,ISEc38,ISEc40,ISEc45,ISEc53,ISEc8	NA	acn-BAC0003,acrA-BAC0005,acrB-BAC0006,acrD/yffA-BAC0008,acrE/envC-BAC0009,acrF/envD-BAC0010,actP/yjcG-BAC0564,arsC-BAC0582,arsC-BAC0583,asr-BAC0038,baeS-BAC0040,bfrA-BAC0048,bhsA/ycfR/comC-BAC0049,comR/ycfQ-BAC0076,copA-BAC0725,corA-BAC0086,corB-BAC0643,corD-BAC0644,cpxA-BAC0532,cueO-BAC0103,cueR/ybbI-BAC0105,cusA/ybdE-BAC0107,cusB-BAC0108,cusC/ylcB-BAC0109,cusF/cusX-BAC0110,cusR/ylcA-BAC0111,cus…	NA	NA	NA	NA	NA	NA	NA	NA	NA	NA	2018-01-31	healthcare associated 0-30d	K84033	M	85	PRJNA604975	SAMN18257708
OX-BSI-217_3	4d2e1ae9-8383-4b49-8eef-0d508a0acb79	4d2e1ae9-8383-4b49-8eef-0d508a0acb79_3	Plasmid	BSI	86317	52.83	ecoli	95	NA	NA	7	58	NA	TnEc1	IncB/O/K/Z_2	NA	MOBP	MPF_I	MOBP	conjugative	PTU-B/O/K/Z	III	1	NA	NA	NA	2018-01-31	healthcare associated 0-30d	K84033	M	85	PRJNA604975	SAMN18257708
OX-BSI-217_2	4d2e1ae9-8383-4b49-8eef-0d508a0acb79	4d2e1ae9-8383-4b49-8eef-0d508a0acb79_2	Plasmid	BSI	118088	50.81	ecoli	95	NA	NA	1	123	NA	IS100kyp,IS21,IS26,ISEc10,ISEc53,TnEc1	Col156_1,IncFIB(AP001918)_1,IncFII(29)_1_pUTI89	NA	MOBF,MOBP	MPF_F	MOBF	conjugative	PTU-FE	III	0.9941	NA	NA	NA	2018-01-31	healthcare associated 0-30d	K84033	M	85	PRJNA604975	SAMN18257708
OX-BSI-218_2	4e14f79b-b372-4f6d-a762-b4942a514281	4e14f79b-b372-4f6d-a762-b4942a514281_2	Plasmid	BSI	251342	52.84	kpneumoniae	10	NA	NA	56	11	NA	IS1A,IS1X2,IS1X3,IS1X4,IS26,IS4321L,IS903B,ISEc21,ISEc22,ISKpn14,ISKpn21	Col440I_1,IncFIB(K)_1_Kpn3,IncFII_1_pKP91	chrA-BAC0026,chrB-BAC0027,copG-BAC0717,fecE-BAC0164,ncrA-BAC0263,ncrB-BAC0264,ncrC-BAC0265,ncrY-BAC0266,nikB-BAC0271,nikC-BAC0272,nikD-BAC0273,pcoA-BAC0303,pcoB-BAC0304,pcoC-BAC0305,pcoD-BAC0306,pcoE-BAC0307,pcoR-BAC0308,pcoS-BAC0309,silA-BAC0341,silB-BAC0342,silC-BAC0343,silE-BAC0344,silF-BAC0345,silP-BAC0346,silR-BAC0347,silS-BAC0348	MOBF,MOBP	MPF_F	-	conjugative	-	-	1	NA	NA	NA	2018-09-24	healthcare associated 31-365d	K84047	M	82	PRJNA604975	NA
OX-BSI-218_3	4e14f79b-b372-4f6d-a762-b4942a514281	4e14f79b-b372-4f6d-a762-b4942a514281_3	Plasmid	BSI	14290	60.9	kpneumoniae	10	NA	NA	NA	NA	NA	NA	NA	NA	MOBP	-	-	mobilizable	-	-	1	NA	NA	NA	2018-09-24	healthcare associated 31-365d	K84047	M	82	PRJNA604975	NA
OX-BSI-218_1	4e14f79b-b372-4f6d-a762-b4942a514281	4e14f79b-b372-4f6d-a762-b4942a514281_chromo	Chromosome	BSI	5332399	57.51	kpneumoniae	10	NA	NA	NA	NA	blaSHV-1,fosA,oqxA,oqxB5	IS903B	NA	acn-BAC0003,acrA-BAC0005,acrB-BAC0006,acrC-BAC0007,acrD-BAC0563,acrE/envC-BAC0009,acrF/envD-BAC0010,actP/yjcG-BAC0564,adeE-BAC0013,arsB-BAC0578,arsC-BAC0582,arsC-BAC0583,arsR-BAC0589,baeR-BAC0596,baeS-BAC0040,bepG-BAC0046,bfrA-BAC0048,bhsA/ycfR/comC-BAC0049,cepA-BAC0061,chrA-BAC0026,chrB-BAC0027,comR/ycfQ-BAC0076,copA-BAC0725,corA-BAC0086,corB-BAC0643,corD-BAC0644,corR-BAC0089,cpxA-BAC0532,cueR/y…	NA	NA	NA	NA	NA	NA	NA	NA	NA	NA	2018-09-24	healthcare associated 31-365d	K84047	M	82	PRJNA604975	NA
OX-BSI-218_4	4e14f79b-b372-4f6d-a762-b4942a514281	4e14f79b-b372-4f6d-a762-b4942a514281_4	Plasmid	BSI	8032	50.61	kpneumoniae	10	NA	NA	NA	NA	NA	Tn5403	Col440I_1	NA	-	-	-	non-mobilizable	-	-	0.5	NA	NA	NA	2018-09-24	healthcare associated 31-365d	K84047	M	82	PRJNA604975	NA
OX-BSI-218_5	4e14f79b-b372-4f6d-a762-b4942a514281	4e14f79b-b372-4f6d-a762-b4942a514281_5	Plasmid	BSI	5761	48.22	kpneumoniae	10	NA	NA	49	13	NA	NA	Col440I_1	NA	-	-	-	non-mobilizable	PTU-?	II	0.75	NA	NA	NA	2018-09-24	healthcare associated 31-365d	K84047	M	82	PRJNA604975	NA
OX-BSI-218_6	4e14f79b-b372-4f6d-a762-b4942a514281	4e14f79b-b372-4f6d-a762-b4942a514281_6	Plasmid	BSI	3336	46.97	kpneumoniae	10	NA	NA	128	5	NA	NA	Col440I_1	NA	-	-	-	non-mobilizable	PTU-E71	III	1	NA	NA	NA	2018-09-24	healthcare associated 31-365d	K84047	M	82	PRJNA604975	NA
OX-BSI-219_2	4e2d86d4-5336-4a69-b816-45c1fcc2cffd	4e2d86d4-5336-4a69-b816-45c1fcc2cffd_2	Plasmid	BSI	124357	52.05	ecoli	131	NA	NA	5	68	aadA5,aph(3'')-Ib,aph(6)-Id,blaCTX-M-27,dfrA17,mph(A),qacEdelta1,sul1,sul2,tet(A)	IS100kyp,IS15DIV,IS1R,IS1X2,IS26,IS5,IS6100,ISEc23	Col156_1,IncFIA_1,IncFIB(AP001918)_1,IncFII(pRSB107)_1_pRSB107	blt-BAC0050,qacEdelta1-BAC0323,srpC-BAC0152	MOBF,MOBP	MPF_F	-	conjugative	PTU-FE	III	0.9941	NA	NA	NA	2017-01-25	healthcare associated 0-30d	K84038	F	89	PRJNA604975	SAMN18257700
OX-BSI-219_3	4e2d86d4-5336-4a69-b816-45c1fcc2cffd	4e2d86d4-5336-4a69-b816-45c1fcc2cffd_3	Plasmid	BSI	5167	47.51	ecoli	131	4	9	4	69	NA	NA	Col156_1	NA	MOBQ	-	-	mobilizable	PTU-E7	III	1	NA	NA	NA	2017-01-25	healthcare associated 0-30d	K84038	F	89	PRJNA604975	SAMN18257700
OX-BSI-219_4	4e2d86d4-5336-4a69-b816-45c1fcc2cffd	4e2d86d4-5336-4a69-b816-45c1fcc2cffd_4	Plasmid	BSI	4082	49.49	ecoli	131	NA	NA	21	29	NA	NA	Col8282_1	NA	MOBQ	-	MOBQ,MOBQ	mobilizable	PTU-E10	III	1	NA	NA	NA	2017-01-25	healthcare associated 0-30d	K84038	F	89	PRJNA604975	SAMN18257700
OX-BSI-219_1	4e2d86d4-5336-4a69-b816-45c1fcc2cffd	4e2d86d4-5336-4a69-b816-45c1fcc2cffd_chromo	Chromosome	BSI	5023693	50.74	ecoli	131	NA	NA	NA	NA	NA	IS100kyp,IS1203,IS1F,IS2,IS200C,IS30,IS5,IS609,ISEc1,ISEc20,ISEc24,ISEc38,ISEc53,ISEc8,ISSd1,ISSen4	NA	acn-BAC0003,acrA-BAC0005,acrD/yffA-BAC0008,acrE/envC-BAC0009,acrF/envD-BAC0010,actP/yjcG-BAC0564,arsC-BAC0582,arsC-BAC0583,asr-BAC0038,baeS-BAC0040,bfrA-BAC0048,bhsA/ycfR/comC-BAC0049,comR/ycfQ-BAC0076,copA-BAC0725,corA-BAC0086,corB-BAC0643,corD-BAC0644,cpxA-BAC0532,cueO-BAC0103,cueR/ybbI-BAC0105,cusA/ybdE-BAC0107,cusB-BAC0108,cusC/ylcB-BAC0109,cusF/cusX-BAC0110,cusR/ylcA-BAC0111,cusS-BAC0112,cut…	NA	NA	NA	NA	NA	NA	NA	NA	NA	NA	2017-01-25	healthcare associated 0-30d	K84038	F	89	PRJNA604975	SAMN18257700
OX-BSI-219_5	4e2d86d4-5336-4a69-b816-45c1fcc2cffd	4e2d86d4-5336-4a69-b816-45c1fcc2cffd_5	Plasmid	BSI	1549	51	ecoli	131	18	7	8	57	NA	NA	Col(MG828)_1	NA	-	-	MOB_unknown,MOBP	mobilizable	PTU-E9	VI	1	NA	NA	NA	2017-01-25	healthcare associated 0-30d	K84038	F	89	PRJNA604975	SAMN18257700
OX-BSI-220_2	4f06a9e3-ab81-43b6-9f7c-a39f97ea3132	4f06a9e3-ab81-43b6-9f7c-a39f97ea3132_2	Plasmid	BSI	5159	47.57	ecoli	73	NA	NA	4	69	NA	NA	Col156_1	NA	MOBQ	-	-	mobilizable	PTU-E7	III	1	NA	NA	NA	2009-11-14	healthcare associated 31-365d	K84002	M	73	PRJNA604975	SAMN18257692
OX-BSI-220_1	4f06a9e3-ab81-43b6-9f7c-a39f97ea3132	4f06a9e3-ab81-43b6-9f7c-a39f97ea3132_chromo	Chromosome	BSI	5223898	50.42	ecoli	73	NA	NA	NA	NA	blaEC-5	IS100kyp,IS1203,IS1F,IS200C,IS630,IS682,ISEc13,ISEc16,ISEc17,ISEc20,ISEc21,ISEc31,ISEc41,ISEc42,ISEc48	NA	acn-BAC0003,acrA-BAC0005,acrD/yffA-BAC0008,acrE/envC-BAC0009,acrF/envD-BAC0010,actP/yjcG-BAC0564,arsC-BAC0582,arsC-BAC0583,asr-BAC0038,baeS-BAC0040,bfrA-BAC0048,bhsA/ycfR/comC-BAC0049,comR/ycfQ-BAC0076,copA-BAC0725,corA-BAC0086,corB-BAC0643,corD-BAC0644,cpxA-BAC0532,cueR/ybbI-BAC0105,cusA/ybdE-BAC0107,cusB-BAC0108,cusC/ylcB-BAC0109,cusF/cusX-BAC0110,cusR/ylcA-BAC0111,cusS-BAC0112,cutA-BAC0113,cut…	NA	NA	NA	NA	NA	NA	NA	NA	NA	NA	2009-11-14	healthcare associated 31-365d	K84002	M	73	PRJNA604975	SAMN18257692
OX-BSI-221_5	4f2aa123-09aa-445f-8248-361f479369ca	4f2aa123-09aa-445f-8248-361f479369ca_5	Plasmid	BSI	4072	49.8	ecoli	4024	NA	NA	9	51	NA	NA	Col8282_1	NA	MOBQ	-	MOBQ,MOBQ	mobilizable	PTU-E10	III	1	NA	NA	NA	2018-11-06	healthcare associated 0-30d	K84028	F	79	PRJNA604975	SAMN18257689
OX-BSI-221_6	4f2aa123-09aa-445f-8248-361f479369ca	4f2aa123-09aa-445f-8248-361f479369ca_6	Plasmid	BSI	3371	55.06	ecoli	4024	NA	NA	72	9	NA	NA	NA	NA	MOBP	-	MOBP	mobilizable	PTU-E14	III	0.9	NA	NA	NA	2018-11-06	healthcare associated 0-30d	K84028	F	79	PRJNA604975	SAMN18257689
OX-BSI-221_1	4f2aa123-09aa-445f-8248-361f479369ca	4f2aa123-09aa-445f-8248-361f479369ca_chromo	Chromosome	BSI	4783714	50.9	ecoli	4024	NA	NA	NA	NA	NA	IS186B,IS1A,IS1F,IS1H,ISEc26,ISEc31,ISEc38	NA	acn-BAC0003,acrA-BAC0005,acrB-BAC0006,acrD/yffA-BAC0008,acrE/envC-BAC0009,acrF/envD-BAC0010,actP/yjcG-BAC0564,arsB-BAC0576,arsC-BAC0583,arsC-BAC0584,arsP-BAC0036,arsR-BAC0594,asr-BAC0038,baeS-BAC0040,bfrA-BAC0048,bhsA/ycfR/comC-BAC0049,comR/ycfQ-BAC0076,copA-BAC0725,copS-BAC0752,corA-BAC0086,corB-BAC0643,corD-BAC0644,cpxA-BAC0532,cueO-BAC0103,cueR/ybbI-BAC0105,cusA/ybdE-BAC0107,cusB-BAC0108,cusC/…	NA	NA	NA	NA	NA	NA	NA	NA	NA	NA	2018-11-06	healthcare associated 0-30d	K84028	F	79	PRJNA604975	SAMN18257689
OX-BSI-221_7	4f2aa123-09aa-445f-8248-361f479369ca	4f2aa123-09aa-445f-8248-361f479369ca_7	Plasmid	BSI	1565	50.86	ecoli	4024	19	8	70	9	NA	NA	Col(MG828)_1	NA	-	-	-	non-mobilizable	PTU-E9	VI	1	NA	NA	NA	2018-11-06	healthcare associated 0-30d	K84028	F	79	PRJNA604975	SAMN18257689
OX-BSI-221_2	4f2aa123-09aa-445f-8248-361f479369ca	4f2aa123-09aa-445f-8248-361f479369ca_2	Plasmid	BSI	146895	50.41	ecoli	4024	NA	NA	NA	NA	NA	ISEc33,ISEc8,ISKpn26,ISSso4	IncFIB(AP001918)_1,IncFIC(FII)_1	yieF-BAC0541	MOBF	MPF_F	MOBF,MOBP	conjugative	-	-	1	NA	NA	NA	2018-11-06	healthcare associated 0-30d	K84028	F	79	PRJNA604975	SAMN18257689
OX-BSI-221_4	4f2aa123-09aa-445f-8248-361f479369ca	4f2aa123-09aa-445f-8248-361f479369ca_4	Plasmid	BSI	6199	47.75	ecoli	4024	NA	NA	NA	NA	NA	NA	Col(MG828)_1	NA	-	-	-	non-mobilizable	-	-	1	NA	NA	NA	2018-11-06	healthcare associated 0-30d	K84028	F	79	PRJNA604975	SAMN18257689
OX-BSI-221_3	4f2aa123-09aa-445f-8248-361f479369ca	4f2aa123-09aa-445f-8248-361f479369ca_3	Plasmid	BSI	100783	50.86	ecoli	4024	NA	NA	3	73	blaTEM-1,tet(A)	IS100kyp,ISSso4	IncI1_1_Alpha	blt-BAC0050,pmrG-BAC0486	MOBP	MPF_I	MOBP	conjugative	PTU-I1	III	1	NA	NA	NA	2018-11-06	healthcare associated 0-30d	K84028	F	79	PRJNA604975	SAMN18257689
OX-BSI-222_6	4f4eb4a7-af56-4028-8c6b-e1014488b0ad	4f4eb4a7-af56-4028-8c6b-e1014488b0ad_6	Plasmid	BSI	8498	46.86	kpneumoniae	490	20	2	142	4	NA	NA	ColRNAI_1	NA	-	-	-	non-mobilizable	PTU-E71	III	1	NA	NA	NA	2013-11-24	healthcare associated 0-30d	K84037	M	93	PRJNA604975	NA
OX-BSI-222_7	4f4eb4a7-af56-4028-8c6b-e1014488b0ad	4f4eb4a7-af56-4028-8c6b-e1014488b0ad_7	Plasmid	BSI	1697	44.49	kpneumoniae	490	NA	NA	26	23	NA	NA	NA	NA	-	-	-	non-mobilizable	-	-	1	NA	NA	NA	2013-11-24	healthcare associated 0-30d	K84037	M	93	PRJNA604975	NA
OX-BSI-222_3	4f4eb4a7-af56-4028-8c6b-e1014488b0ad	4f4eb4a7-af56-4028-8c6b-e1014488b0ad_3	Plasmid	BSI	119712	52.14	kpneumoniae	490	NA	NA	13	41	aph(3'')-Ib,aph(6)-Id,blaCTX-M-15,blaTEM-1,dfrA14,qnrB1,sul2	IS102,IS6100,ISEc9	IncFII_1_pKP91	NA	MOBF,MOBF	MPF_F	-	conjugative	PTU-FK	III	0.9922	NA	NA	NA	2013-11-24	healthcare associated 0-30d	K84037	M	93	PRJNA604975	NA
OX-BSI-222_2	4f4eb4a7-af56-4028-8c6b-e1014488b0ad	4f4eb4a7-af56-4028-8c6b-e1014488b0ad_2	Plasmid	BSI	224385	51.11	kpneumoniae	490	NA	NA	19	33	NA	IS1A,IS1X4,IS903,ISEc21,ISEc36,ISKox1,ISKpn2,ISKpn21,ISKpn24,ISSen3	IncFIB(K)_1_Kpn3	copG-BAC0717,fecE-BAC0164,pcoA-BAC0303,pcoB-BAC0304,pcoC-BAC0305,pcoD-BAC0306,pcoE-BAC0307,pcoR-BAC0308,pcoS-BAC0309,pstB-BAC0316,silA-BAC0341,silB-BAC0342,silC-BAC0343,silE-BAC0344,silF-BAC0345,silP-BAC0346,silR-BAC0347,silS-BAC0348	-	-	-	non-mobilizable	PTU-E35	I	1	NA	NA	NA	2013-11-24	healthcare associated 0-30d	K84037	M	93	PRJNA604975	NA
OX-BSI-222_4	4f4eb4a7-af56-4028-8c6b-e1014488b0ad	4f4eb4a7-af56-4028-8c6b-e1014488b0ad_4	Plasmid	BSI	19076	47.58	kpneumoniae	490	NA	NA	20	32	NA	IS1X4,ISSen4,Tn5403	IncFIA(HI1)_1_HI1	NA	-	-	MOBF	mobilizable	-	-	1	NA	NA	NA	2013-11-24	healthcare associated 0-30d	K84037	M	93	PRJNA604975	NA
OX-BSI-222_5	4f4eb4a7-af56-4028-8c6b-e1014488b0ad	4f4eb4a7-af56-4028-8c6b-e1014488b0ad_5	Plasmid	BSI	9553	51.74	kpneumoniae	490	5	32	18	34	NA	Tn5403	NA	NA	MOBP	-	-	mobilizable	-	-	1	NA	NA	NA	2013-11-24	healthcare associated 0-30d	K84037	M	93	PRJNA604975	NA
OX-BSI-222_1	4f4eb4a7-af56-4028-8c6b-e1014488b0ad	4f4eb4a7-af56-4028-8c6b-e1014488b0ad_chromo	Chromosome	BSI	5490948	57.29	kpneumoniae	490	NA	NA	NA	NA	blaSHV-1,fosA,oqxA,oqxB	ISEc21,Tn5403	NA	acn-BAC0003,acrA-BAC0005,acrB-BAC0006,acrC-BAC0007,acrD-BAC0563,acrE/envC-BAC0009,acrF/envD-BAC0010,actP/yjcG-BAC0564,adeE-BAC0013,arsB-BAC0578,arsC-BAC0582,arsC-BAC0583,arsR-BAC0589,baeR-BAC0596,baeS-BAC0040,bepG-BAC0046,bfrA-BAC0048,bhsA/ycfR/comC-BAC0049,cepA-BAC0061,comR/ycfQ-BAC0076,copA-BAC0725,corA-BAC0086,corB-BAC0643,corD-BAC0644,corR-BAC0089,cpxA-BAC0532,cueR/ybbI-BAC0105,cusA/ybdE-BAC0…	NA	NA	NA	NA	NA	NA	NA	NA	NA	NA	2013-11-24	healthcare associated 0-30d	K84037	M	93	PRJNA604975	NA
OX-BSI-223_1	505996bc-dd99-4900-a1e4-337b1825f1bc	505996bc-dd99-4900-a1e4-337b1825f1bc_chromo	Chromosome	BSI	4779126	50.65	ecoli	636	NA	NA	NA	NA	NA	IS200C,ISEc21,ISEc40,ISEc42	NA	acn-BAC0003,acrA-BAC0005,acrD/yffA-BAC0008,acrE/envC-BAC0009,acrF/envD-BAC0010,actP/yjcG-BAC0564,arsC-BAC0582,arsC-BAC0583,asr-BAC0038,baeS-BAC0040,bfrA-BAC0048,bhsA/ycfR/comC-BAC0049,comR/ycfQ-BAC0076,copA-BAC0725,copS-BAC0752,corA-BAC0086,corB-BAC0643,corD-BAC0644,cpxA-BAC0532,cueO-BAC0103,cueR/ybbI-BAC0105,cusA/ybdE-BAC0107,cusB-BAC0108,cusC/ylcB-BAC0109,cusF/cusX-BAC0110,cusR/ylcA-BAC0111,cus…	NA	NA	NA	NA	NA	NA	NA	NA	NA	NA	2009-08-26	community	K84038	M	72	PRJNA604975	SAMN18257679
OX-BSI-224_1	50c5ce8e-9a79-4194-aabf-326c9c40f011	50c5ce8e-9a79-4194-aabf-326c9c40f011_chromo	Chromosome	BSI	5964540	55.96	koxytoca	88	NA	NA	NA	NA	aph(3')-Ia,blaOXY,oqxA,oqxB	ISEc42,ISKpn24,ISKpn28	NA	acn-BAC0003,acrA-BAC0005,acrC-BAC0007,acrD-BAC0563,acrE/envC-BAC0009,acrF/envD-BAC0010,actP/yjcG-BAC0564,adeE-BAC0013,arsB-BAC0576,arsC-BAC0583,arsC-BAC0584,arsR-BAC0589,baeS-BAC0040,bepG-BAC0046,bfrA-BAC0048,bhsA/ycfR/comC-BAC0049,cepA-BAC0061,comR/ycfQ-BAC0076,copA-BAC0725,copS-BAC0637,corA-BAC0086,corB-BAC0643,corC-BAC0088,corD-BAC0644,cpxA-BAC0532,cueR/ybbI-BAC0105,cuiD-BAC0106,cusA/ybdE-BAC0…	NA	NA	NA	NA	NA	NA	NA	NA	NA	NA	2013-01-17	nosocomial	K84040	M	84	PRJNA604975	NA
OX-BSI-224_5	50c5ce8e-9a79-4194-aabf-326c9c40f011	50c5ce8e-9a79-4194-aabf-326c9c40f011_5	Plasmid	BSI	3514	54.35	koxytoca	88	NA	NA	53	11	NA	NA	Col440I_1	NA	MOBP,MOBP	-	MOBP	mobilizable	PTU-E3	V	0.8358	NA	NA	NA	2013-01-17	nosocomial	K84040	M	84	PRJNA604975	NA
OX-BSI-224_2	50c5ce8e-9a79-4194-aabf-326c9c40f011	50c5ce8e-9a79-4194-aabf-326c9c40f011_2	Plasmid	BSI	196587	51.81	koxytoca	88	NA	NA	NA	NA	NA	IS1400,IS1A,IS5,IS903B,ISEc21,ISKpn24,Tn5403	IncFIB(K)_1_Kpn3,IncFII_1_pKP91	arsA-BAC0030,arsB-BAC0576,arsC-BAC0583,arsD-BAC0587,arsR-BAC0591,cepA-BAC0061,copG-BAC0717,pcoA-BAC0303,pcoB-BAC0304,pcoC-BAC0305,pcoD-BAC0306,pcoE-BAC0307,pcoR-BAC0308,pcoS-BAC0309,pstB-BAC0316,silA-BAC0341,silB-BAC0342,silC-BAC0343,silE-BAC0344,silF-BAC0345,silP-BAC0346,silR-BAC0347,silS-BAC0348,sugE-BAC0378,yfeB-BAC0440	MOBF	MPF_F	-	conjugative	-	-	1	NA	NA	NA	2013-01-17	nosocomial	K84040	M	84	PRJNA604975	NA
OX-BSI-224_3	50c5ce8e-9a79-4194-aabf-326c9c40f011	50c5ce8e-9a79-4194-aabf-326c9c40f011_3	Plasmid	BSI	163387	53.53	koxytoca	88	NA	NA	NA	NA	NA	IS1400,IS26,ISEc21,ISKpn14,ISKpn2,ISKpn26,Tn5403	IncFII(p14)_1_p14	merA-BAC0652,merC-BAC0664,merD-BAC0666,merE-BAC0672,merP-BAC0678,merR-BAC0689,merT-BAC0233,pbrA-BAC0298,pbrB/pbrC-BAC0299,pbrR-BAC0301	MOBF	MPF_F	-	conjugative	PTU-E42	I	1	NA	NA	NA	2013-01-17	nosocomial	K84040	M	84	PRJNA604975	NA
OX-BSI-224_4	50c5ce8e-9a79-4194-aabf-326c9c40f011	50c5ce8e-9a79-4194-aabf-326c9c40f011_4	Plasmid	BSI	34281	35.75	koxytoca	88	NA	NA	NA	NA	NA	IS5	NA	NA	-	-	-	non-mobilizable	-	-	1	NA	NA	NA	2013-01-17	nosocomial	K84040	M	84	PRJNA604975	NA
OX-BSI-225_2	50cc339e-23f7-412c-a03d-7e256e339236	50cc339e-23f7-412c-a03d-7e256e339236_2	Plasmid	BSI	130399	53.05	ecoli	131	NA	NA	90	7	aac(6')-Ib-cr5,aadA5,blaCTX-M-15,blaOXA-1,catB3,dfrA17,mph(A),qacEdelta1,sul1,tet(A)	IS1203,IS1A,IS1R,IS6100,ISEc12,ISEc23,Tn5403	IncFIA_1,IncFII_1	blt-BAC0050,iclR-BAC0196,qacEdelta1-BAC0323,wtpC-BAC0604	MOBF	MPF_F	MOBF	conjugative	PTU-FE	III	0.9941	NA	NA	NA	2018-09-07	nosocomial	J83031	M	71	PRJNA604975	SAMN18257676
OX-BSI-225_1	50cc339e-23f7-412c-a03d-7e256e339236	50cc339e-23f7-412c-a03d-7e256e339236_chromo	Chromosome	BSI	5075605	50.79	ecoli	131	NA	NA	NA	NA	NA	IS100kyp,IS1203,IS2,IS200C,IS21,IS30,IS609,ISCro1,ISEc1,ISEc10,ISEc20,ISEc24,ISEc38,ISEc8,ISSd1	NA	acn-BAC0003,acrA-BAC0005,acrD/yffA-BAC0008,acrE/envC-BAC0009,acrF/envD-BAC0010,actP/yjcG-BAC0564,arsC-BAC0582,arsC-BAC0583,asr-BAC0038,baeS-BAC0040,bfrA-BAC0048,bhsA/ycfR/comC-BAC0049,comR/ycfQ-BAC0076,copA-BAC0725,corA-BAC0086,corB-BAC0643,corD-BAC0644,cpxA-BAC0532,cueO-BAC0103,cueR/ybbI-BAC0105,cusA/ybdE-BAC0107,cusB-BAC0108,cusC/ylcB-BAC0109,cusF/cusX-BAC0110,cusR/ylcA-BAC0111,cusS-BAC0112,cut…	NA	NA	NA	NA	NA	NA	NA	NA	NA	NA	2018-09-07	nosocomial	J83031	M	71	PRJNA604975	SAMN18257676
OX-BSI-225_3	50cc339e-23f7-412c-a03d-7e256e339236	50cc339e-23f7-412c-a03d-7e256e339236_3	Plasmid	BSI	32997	40.78	ecoli	131	NA	NA	NA	NA	NA	NA	NA	triA-BAC0396,triC-BAC0398	MOBP	MPF_T	-	conjugative	PTU-X4	III	1	NA	NA	NA	2018-09-07	nosocomial	J83031	M	71	PRJNA604975	SAMN18257676
OX-BSI-226_4	50e533d4-af86-47f6-982b-6bf73924b207	50e533d4-af86-47f6-982b-6bf73924b207_4	Plasmid	BSI	5166	47.54	ecoli	73	NA	NA	4	69	NA	NA	Col156_1	NA	MOBQ	-	-	mobilizable	PTU-E7	III	1	NA	NA	NA	2016-01-18	community	C86014	M	78	PRJNA604975	SAMN18257672
OX-BSI-226_5	50e533d4-af86-47f6-982b-6bf73924b207	50e533d4-af86-47f6-982b-6bf73924b207_5	Plasmid	BSI	1546	51.49	ecoli	73	NA	NA	29	21	NA	NA	Col(MG828)_1	NA	-	-	MOB_unknown,MOBP	mobilizable	PTU-E9	VI	1	NA	NA	NA	2016-01-18	community	C86014	M	78	PRJNA604975	SAMN18257672
OX-BSI-226_1	50e533d4-af86-47f6-982b-6bf73924b207	50e533d4-af86-47f6-982b-6bf73924b207_chromo	Chromosome	BSI	4986408	50.64	ecoli	73	NA	NA	NA	NA	blaEC-5	IS1203,IS30,IS629,IS630,ISEc20,ISEc39,ISEc40,ISEc41,ISEc42	NA	acn-BAC0003,acrA-BAC0005,acrD/yffA-BAC0008,acrE/envC-BAC0009,acrF/envD-BAC0010,actP/yjcG-BAC0564,arsC-BAC0582,arsC-BAC0583,asr-BAC0038,baeS-BAC0040,bfrA-BAC0048,bhsA/ycfR/comC-BAC0049,comR/ycfQ-BAC0076,copA-BAC0725,corA-BAC0086,corB-BAC0643,corD-BAC0644,cpxA-BAC0532,cueO-BAC0103,cueR/ybbI-BAC0105,cusA/ybdE-BAC0107,cusB-BAC0108,cusC/ylcB-BAC0109,cusF/cusX-BAC0110,cusR/ylcA-BAC0111,cusS-BAC0112,cut…	NA	NA	NA	NA	NA	NA	NA	NA	NA	NA	2016-01-18	community	C86014	M	78	PRJNA604975	SAMN18257672
OX-BSI-226_2	50e533d4-af86-47f6-982b-6bf73924b207	50e533d4-af86-47f6-982b-6bf73924b207_2	Plasmid	BSI	114230	51.03	ecoli	73	NA	NA	1	123	NA	IS100kyp,IS21,IS26,ISEc10,ISEc53	Col156_1,IncFIB(AP001918)_1,IncFII(29)_1_pUTI89	NA	MOBF,MOBP	MPF_F	MOBF	conjugative	PTU-FE	III	0.994	NA	NA	NA	2016-01-18	community	C86014	M	78	PRJNA604975	SAMN18257672
OX-BSI-226_3	50e533d4-af86-47f6-982b-6bf73924b207	50e533d4-af86-47f6-982b-6bf73924b207_3	Plasmid	BSI	5881	47.42	ecoli	73	NA	NA	11	43	NA	NA	ColRNAI_1	NA	MOBP,MOBP	-	MOBP	mobilizable	PTU-E22	I	1	NA	NA	NA	2016-01-18	community	C86014	M	78	PRJNA604975	SAMN18257672
OX-BSI-227_1	511cc62d-7a6e-4917-9abf-a391a2ea2c56	511cc62d-7a6e-4917-9abf-a391a2ea2c56_chromo	Chromosome	BSI	5066291	50.64	ecoli	131	NA	NA	NA	NA	NA	IS100kyp,IS1203,IS200C,IS30,IS609,ISEc1,ISEc20,ISEc22,ISEc24,ISEc38	NA	acn-BAC0003,acrA-BAC0005,acrD/yffA-BAC0008,acrE/envC-BAC0009,acrF/envD-BAC0010,actP/yjcG-BAC0564,arsC-BAC0582,arsC-BAC0583,asr-BAC0038,baeS-BAC0040,bfrA-BAC0048,bhsA/ycfR/comC-BAC0049,comR/ycfQ-BAC0076,copA-BAC0725,corA-BAC0086,corB-BAC0643,corD-BAC0644,cpxA-BAC0532,cueO-BAC0103,cueR/ybbI-BAC0105,cusA/ybdE-BAC0107,cusB-BAC0108,cusC/ylcB-BAC0109,cusF/cusX-BAC0110,cusR/ylcA-BAC0111,cusS-BAC0112,cut…	NA	NA	NA	NA	NA	NA	NA	NA	NA	NA	2008-10-02	healthcare associated 31-365d	K84037	M	0	PRJNA604975	SAMN18257669
OX-BSI-227_2	511cc62d-7a6e-4917-9abf-a391a2ea2c56	511cc62d-7a6e-4917-9abf-a391a2ea2c56_2	Plasmid	BSI	114230	51.02	ecoli	131	NA	NA	1	123	NA	IS100kyp,IS21,IS26,ISEc10,ISEc53	Col156_1,IncFIB(AP001918)_1,IncFII(29)_1_pUTI89	NA	MOBF,MOBP	MPF_F	MOBF	conjugative	PTU-FE	III	0.7083	NA	NA	NA	2008-10-02	healthcare associated 31-365d	K84037	M	0	PRJNA604975	SAMN18257669
OX-BSI-228_1	513654df-c4b5-4684-b304-e3f53c67c1c9	513654df-c4b5-4684-b304-e3f53c67c1c9_chromo	Chromosome	BSI	4738860	50.83	ecoli	10	NA	NA	NA	NA	NA	IS100kyp,IS150,IS1R,IS1X2,IS2,IS609,IS903B,ISEc26,ISEc5,ISEc8	NA	acn-BAC0003,acrA-BAC0005,acrB-BAC0006,acrD/yffA-BAC0008,actP/yjcG-BAC0564,arsB-BAC0576,arsC-BAC0583,arsC-BAC0584,arsR-BAC0594,asr-BAC0038,baeS-BAC0040,bfrA-BAC0048,bhsA/ycfR/comC-BAC0049,comR/ycfQ-BAC0076,copA-BAC0725,copS-BAC0752,corA-BAC0086,corB-BAC0643,corD-BAC0644,cpxA-BAC0532,cueO-BAC0103,cueR/ybbI-BAC0105,cusA/ybdE-BAC0107,cusB-BAC0108,cusC/ylcB-BAC0109,cusF/cusX-BAC0110,cusR/ylcA-BAC0111,…	NA	NA	NA	NA	NA	NA	NA	NA	NA	NA	2014-08-11	nosocomial	K84021	F	79	PRJNA604975	NA
OX-BSI-228_3	513654df-c4b5-4684-b304-e3f53c67c1c9	513654df-c4b5-4684-b304-e3f53c67c1c9_3	Plasmid	BSI	63589	51.22	ecoli	10	8	7	84	7	blaOXA-48	NA	IncL/M(pOXA-48)_1_pOXA-48	adeL-BAC0508	MOBP	MPF_I	-	conjugative	PTU-L/M	IV	1	NA	NA	NA	2014-08-11	nosocomial	K84021	F	79	PRJNA604975	NA
OX-BSI-228_2	513654df-c4b5-4684-b304-e3f53c67c1c9	513654df-c4b5-4684-b304-e3f53c67c1c9_2	Plasmid	BSI	65185	52.67	ecoli	10	NA	NA	185	3	aph(3'')-Ib,aph(6)-Id,blaTEM-1,sul2,tet(A)	IS1R,IS5075,ISKpn26	IncY_1	blt-BAC0050	-	-	-	non-mobilizable	-	-	1	NA	NA	NA	2014-08-11	nosocomial	K84021	F	79	PRJNA604975	NA
OX-BSI-229_3	5252df4f-4230-47bb-85ff-6f6cf43cffb1_contig	5252df4f-4230-47bb-85ff-6f6cf43cffb1_contig_3	Plasmid	BSI	181446	52.19	ecoli	38	NA	NA	1	123	blaCTX-M-27	IS1203,IS1R,IS2,IS21,IS903B,ISEc23,ISEc53,ISKpn26	IncFIB(AP001918)_1,IncFII_1	fecD-BAC0163,fecE-BAC0164,iclR-BAC0196,wtpC-BAC0604	MOBF,MOBF	MPF_F	MOBF	conjugative	PTU-FE	III	1	NA	NA	NA	NA	NA	NA	NA	NA	PRJNA604975	SAMN18257662
OX-BSI-229_2	5252df4f-4230-47bb-85ff-6f6cf43cffb1_contig	5252df4f-4230-47bb-85ff-6f6cf43cffb1_contig_2	Plasmid	BSI	9970	45.62	ecoli	38	NA	NA	NA	NA	NA	NA	NA	NA	-	-	-	non-mobilizable	-	-	1	NA	NA	NA	NA	NA	NA	NA	NA	PRJNA604975	SAMN18257662
OX-BSI-229_1	5252df4f-4230-47bb-85ff-6f6cf43cffb1_contig	5252df4f-4230-47bb-85ff-6f6cf43cffb1_contig_chromo	Chromosome	BSI	5155571	50.65	ecoli	38	NA	NA	NA	NA	NA	IS1H,IS21,IS5075,ISCro1,ISEc10,ISEc30,ISEc38,ISEc40,ISEc46,ISEc8,ISSd1	NA	acn-BAC0003,acrA-BAC0005,acrD/yffA-BAC0008,acrE/envC-BAC0009,acrF/envD-BAC0010,actP/yjcG-BAC0564,arsB-BAC0576,arsC-BAC0582,arsC-BAC0583,arsP-BAC0036,arsR-BAC0594,asr-BAC0038,baeS-BAC0040,bfrA-BAC0048,bhsA/ycfR/comC-BAC0049,comR/ycfQ-BAC0076,copA-BAC0725,copS-BAC0752,corA-BAC0086,corB-BAC0643,corC-BAC0088,corD-BAC0644,cpxA-BAC0532,cueO-BAC0103,cueR/ybbI-BAC0105,cusA/ybdE-BAC0107,cusB-BAC0108,cusC/…	NA	NA	NA	NA	NA	NA	NA	NA	NA	NA	NA	NA	NA	NA	NA	PRJNA604975	SAMN18257662
OX-BSI-230_3	5295590b-4519-470a-8416-e8045f05c677	5295590b-4519-470a-8416-e8045f05c677_3	Plasmid	BSI	6003	49.09	cfreundii	543	NA	NA	NA	NA	NA	NA	Col156_1	NA	MOBQ	-	-	mobilizable	PTU-E7	III	1	NA	NA	NA	2018-10-10	healthcare associated 0-30d	K84030	M	69	PRJNA604975	SAMN18257657
OX-BSI-230_4	5295590b-4519-470a-8416-e8045f05c677	5295590b-4519-470a-8416-e8045f05c677_4	Plasmid	BSI	5716	42.34	cfreundii	543	6	5	31	20	NA	NA	Col156_1	NA	MOBQ	-	-	mobilizable	-	-	1	NA	NA	NA	2018-10-10	healthcare associated 0-30d	K84030	M	69	PRJNA604975	SAMN18257657
OX-BSI-230_5	5295590b-4519-470a-8416-e8045f05c677	5295590b-4519-470a-8416-e8045f05c677_5	Plasmid	BSI	5631	47.36	cfreundii	543	NA	NA	11	43	NA	NA	ColRNAI_1	NA	MOBP	-	MOBP	mobilizable	PTU-E22	I	1	NA	NA	NA	2018-10-10	healthcare associated 0-30d	K84030	M	69	PRJNA604975	SAMN18257657
OX-BSI-230_6	5295590b-4519-470a-8416-e8045f05c677	5295590b-4519-470a-8416-e8045f05c677_6	Plasmid	BSI	5182	47.18	cfreundii	543	NA	NA	4	69	NA	NA	Col156_1	NA	MOBQ	-	-	mobilizable	PTU-E7	III	1	NA	NA	NA	2018-10-10	healthcare associated 0-30d	K84030	M	69	PRJNA604975	SAMN18257657
OX-BSI-230_8	5295590b-4519-470a-8416-e8045f05c677	5295590b-4519-470a-8416-e8045f05c677_8	Plasmid	BSI	1982	56.76	cfreundii	543	NA	NA	91	7	NA	NA	ColpVC_1	NA	-	-	MOBP	mobilizable	PTU-E11	III	1	NA	NA	NA	2018-10-10	healthcare associated 0-30d	K84030	M	69	PRJNA604975	SAMN18257657
OX-BSI-230_1	5295590b-4519-470a-8416-e8045f05c677	5295590b-4519-470a-8416-e8045f05c677_chromo	Chromosome	BSI	5079820	50.55	cfreundii	543	NA	NA	NA	NA	blaEC-5	IS100kyp,IS1203,IS1F,IS200C,IS630,ISEc13,ISEc16,ISEc20,ISEc39,ISEc40,ISEc41,ISEc42,ISEc8	NA	acn-BAC0003,acrA-BAC0005,acrD/yffA-BAC0008,acrE/envC-BAC0009,acrF/envD-BAC0010,actP/yjcG-BAC0564,arsC-BAC0582,arsC-BAC0583,asr-BAC0038,baeS-BAC0040,bfrA-BAC0048,bhsA/ycfR/comC-BAC0049,comR/ycfQ-BAC0076,copA-BAC0725,corA-BAC0086,corB-BAC0643,corD-BAC0644,cpxA-BAC0532,cueO-BAC0103,cueR/ybbI-BAC0105,cusA/ybdE-BAC0107,cusB-BAC0108,cusC/ylcB-BAC0109,cusF/cusX-BAC0110,cusR/ylcA-BAC0111,cusS-BAC0112,cut…	NA	NA	NA	NA	NA	NA	NA	NA	NA	NA	2018-10-10	healthcare associated 0-30d	K84030	M	69	PRJNA604975	SAMN18257657
OX-BSI-230_2	5295590b-4519-470a-8416-e8045f05c677	5295590b-4519-470a-8416-e8045f05c677_2	Plasmid	BSI	8274	47.05	cfreundii	543	NA	NA	86	7	blaTEM	Tn3	ColRNAI_1	NA	MOBF	-	MOB_unknown	mobilizable	-	-	1	NA	NA	NA	2018-10-10	healthcare associated 0-30d	K84030	M	69	PRJNA604975	SAMN18257657
OX-BSI-230_7	5295590b-4519-470a-8416-e8045f05c677	5295590b-4519-470a-8416-e8045f05c677_7	Plasmid	BSI	4073	51.44	cfreundii	543	NA	NA	47	13	NA	NA	NA	NA	MOBQ,MOBQ	-	MOBQ,MOBQ	mobilizable	PTU-E10	III	1	NA	NA	NA	2018-10-10	healthcare associated 0-30d	K84030	M	69	PRJNA604975	SAMN18257657
OX-BSI-230_9	5295590b-4519-470a-8416-e8045f05c677	5295590b-4519-470a-8416-e8045f05c677_9	Plasmid	BSI	1552	51.87	cfreundii	543	NA	NA	6	62	NA	NA	Col(MG828)_1	NA	-	-	MOB_unknown	mobilizable	PTU-E9	VI	1	NA	NA	NA	2018-10-10	healthcare associated 0-30d	K84030	M	69	PRJNA604975	SAMN18257657
OX-BSI-231_1	52fe5438-9c28-4f69-8b86-42f16adde423	52fe5438-9c28-4f69-8b86-42f16adde423_chromo	Chromosome	BSI	4845369	50.56	ecoli	537	NA	NA	NA	NA	blaEC-5	IS1397,IS200C,IS621,IS630,ISEc21,ISEc38,ISEc39,ISEc42,ISEc47	NA	acn-BAC0003,acrA-BAC0005,acrD/yffA-BAC0008,acrE/envC-BAC0009,acrF/envD-BAC0010,actP/yjcG-BAC0564,arsC-BAC0582,arsC-BAC0583,asr-BAC0038,baeS-BAC0040,bfrA-BAC0048,bhsA/ycfR/comC-BAC0049,comR/ycfQ-BAC0076,copA-BAC0725,copS-BAC0752,corA-BAC0086,corB-BAC0643,corD-BAC0644,cpxA-BAC0532,cueO-BAC0103,cueR/ybbI-BAC0105,cusA/ybdE-BAC0107,cusB-BAC0108,cusC/ylcB-BAC0109,cusF/cusX-BAC0110,cusR/ylcA-BAC0111,cus…	NA	NA	NA	NA	NA	NA	NA	NA	NA	NA	2018-08-10	healthcare associated 31-365d	K84002	M	79	PRJNA604975	SAMN18257654
OX-BSI-232_5	53ffb45a-9c61-4e67-addd-a921a3c48672	53ffb45a-9c61-4e67-addd-a921a3c48672_5	Plasmid	BSI	15248	49.48	kpneumoniae	490	NA	NA	NA	NA	NA	Tn5403	ColRNAI_1	NA	-	-	-	non-mobilizable	PTU-?	III	0.5	NA	NA	NA	2012-06-21	healthcare associated 31-365d	K84038	M	67	PRJNA604975	SAMN14345060
OX-BSI-232_3	53ffb45a-9c61-4e67-addd-a921a3c48672	53ffb45a-9c61-4e67-addd-a921a3c48672_3	Plasmid	BSI	110080	52.42	kpneumoniae	490	NA	NA	13	41	aac(6')-Ib-cr5,dfrA14,qnrB1	IS102,IS6100,Tn5403	IncFII_1_pKP91	NA	MOBF,MOBF	MPF_F	-	conjugative	PTU-FK	III	1	NA	NA	NA	2012-06-21	healthcare associated 31-365d	K84038	M	67	PRJNA604975	SAMN14345060
OX-BSI-232_6	53ffb45a-9c61-4e67-addd-a921a3c48672	53ffb45a-9c61-4e67-addd-a921a3c48672_6	Plasmid	BSI	9554	51.74	kpneumoniae	490	5	32	18	34	NA	Tn5403	NA	NA	MOBP	-	-	mobilizable	-	-	1	NA	NA	NA	2012-06-21	healthcare associated 31-365d	K84038	M	67	PRJNA604975	SAMN14345060
OX-BSI-232_1	53ffb45a-9c61-4e67-addd-a921a3c48672	53ffb45a-9c61-4e67-addd-a921a3c48672_chromo	Chromosome	BSI	5294170	57.44	kpneumoniae	490	NA	NA	NA	NA	blaSHV-1,fosA,oqxA,oqxB	IS5075,IS903B,Tn5403	NA	acn-BAC0003,acrA-BAC0005,acrB-BAC0006,acrC-BAC0007,acrD-BAC0563,acrE/envC-BAC0009,acrF/envD-BAC0010,actP/yjcG-BAC0564,adeE-BAC0013,arsB-BAC0578,arsC-BAC0582,arsC-BAC0583,arsR-BAC0589,baeR-BAC0596,baeS-BAC0040,bfrA-BAC0048,bhsA/ycfR/comC-BAC0049,cepA-BAC0061,comR/ycfQ-BAC0076,copA-BAC0725,corA-BAC0086,corB-BAC0643,corD-BAC0644,corR-BAC0089,cpxA-BAC0532,cueR/ybbI-BAC0105,cusA/ybdE-BAC0107,cusB-BAC0…	NA	NA	NA	NA	NA	NA	NA	NA	NA	NA	2012-06-21	healthcare associated 31-365d	K84038	M	67	PRJNA604975	SAMN14345060
OX-BSI-232_4	53ffb45a-9c61-4e67-addd-a921a3c48672	53ffb45a-9c61-4e67-addd-a921a3c48672_4	Plasmid	BSI	15412	45.52	kpneumoniae	490	NA	NA	20	32	NA	IS102,IS1X4,ISSen4	IncFIA(HI1)_1_HI1	NA	-	-	MOBF	mobilizable	-	-	1	NA	NA	NA	2012-06-21	healthcare associated 31-365d	K84038	M	67	PRJNA604975	SAMN14345060
OX-BSI-232_2	53ffb45a-9c61-4e67-addd-a921a3c48672	53ffb45a-9c61-4e67-addd-a921a3c48672_2	Plasmid	BSI	110508	50.21	kpneumoniae	490	NA	NA	19	33	NA	ISEc36,ISEc8,ISKox1,ISKpn2,ISKpn21,ISKpn26	IncFIB(K)_1_Kpn3	NA	-	-	-	non-mobilizable	PTU-E35	I	1	NA	NA	NA	2012-06-21	healthcare associated 31-365d	K84038	M	67	PRJNA604975	SAMN14345060
OX-BSI-232_7	53ffb45a-9c61-4e67-addd-a921a3c48672	53ffb45a-9c61-4e67-addd-a921a3c48672_7	Plasmid	BSI	3515	54.37	kpneumoniae	490	193	3	53	11	NA	NA	Col440I_1,Col440II_1	NA	MOBP,MOBP	-	MOBP	mobilizable	PTU-E3	V	0.9118	NA	NA	NA	2012-06-21	healthcare associated 31-365d	K84038	M	67	PRJNA604975	SAMN14345060
OX-BSI-233_5	54004f28-8c5f-4c63-a2a4-ca7a02e4e8a4	54004f28-8c5f-4c63-a2a4-ca7a02e4e8a4_5	Plasmid	BSI	2089	47.25	ecoli	69	NA	NA	22	29	NA	NA	Col(BS512)_1	NA	-	-	-	non-mobilizable	PTU-E47	III	1	NA	NA	NA	2018-06-08	nosocomial	K84075	F	52	PRJNA604975	SAMN18257645
OX-BSI-233_4	54004f28-8c5f-4c63-a2a4-ca7a02e4e8a4	54004f28-8c5f-4c63-a2a4-ca7a02e4e8a4_4	Plasmid	BSI	4072	49.8	ecoli	69	NA	NA	9	51	NA	NA	Col8282_1	NA	MOBQ	-	MOBQ,MOBQ	mobilizable	PTU-E10	III	1	NA	NA	NA	2018-06-08	nosocomial	K84075	F	52	PRJNA604975	SAMN18257645
OX-BSI-233_6	54004f28-8c5f-4c63-a2a4-ca7a02e4e8a4	54004f28-8c5f-4c63-a2a4-ca7a02e4e8a4_6	Plasmid	BSI	1549	51	ecoli	69	NA	NA	8	57	NA	NA	Col(MG828)_1	NA	-	-	MOB_unknown,MOBP	mobilizable	PTU-E9	VI	1	NA	NA	NA	2018-06-08	nosocomial	K84075	F	52	PRJNA604975	SAMN18257645
OX-BSI-233_3	54004f28-8c5f-4c63-a2a4-ca7a02e4e8a4	54004f28-8c5f-4c63-a2a4-ca7a02e4e8a4_3	Plasmid	BSI	5154	47.42	ecoli	69	NA	NA	4	69	NA	NA	Col156_1	NA	MOBQ	-	-	mobilizable	PTU-E7	III	1	NA	NA	NA	2018-06-08	nosocomial	K84075	F	52	PRJNA604975	SAMN18257645
OX-BSI-233_2	54004f28-8c5f-4c63-a2a4-ca7a02e4e8a4	54004f28-8c5f-4c63-a2a4-ca7a02e4e8a4_2	Plasmid	BSI	133769	50.79	ecoli	69	NA	NA	NA	NA	NA	IS1A,IS1R,IS2	Col156_1,IncFIB(AP001918)_1,IncFIC(FII)_1	fecD-BAC0163,troB-BAC0400	MOBF,MOBP	MPF_F	MOBF	conjugative	PTU-FE	III	0.9941	NA	NA	NA	2018-06-08	nosocomial	K84075	F	52	PRJNA604975	SAMN18257645
OX-BSI-233_1	54004f28-8c5f-4c63-a2a4-ca7a02e4e8a4	54004f28-8c5f-4c63-a2a4-ca7a02e4e8a4_chromo	Chromosome	BSI	5193498	50.75	ecoli	69	NA	NA	NA	NA	NA	IS1F,IS30,IS3411,ISEc20,ISEc22,ISEc38,ISEc46	NA	acn-BAC0003,acrA-BAC0005,acrB-BAC0006,acrD/yffA-BAC0008,acrE/envC-BAC0009,acrF/envD-BAC0010,actP/yjcG-BAC0564,arsA-BAC0571,arsB-BAC0576,arsC-BAC0582,arsC-BAC0583,arsD-BAC0587,arsP-BAC0036,arsR-BAC0594,asr-BAC0038,baeS-BAC0040,bfrA-BAC0048,bhsA/ycfR/comC-BAC0049,comR/ycfQ-BAC0076,copA-BAC0725,corA-BAC0086,corB-BAC0643,corD-BAC0644,cpxA-BAC0532,cueO-BAC0103,cueR/ybbI-BAC0105,cusA/ybdE-BAC0107,cusB-…	NA	NA	NA	NA	NA	NA	NA	NA	NA	NA	2018-06-08	nosocomial	K84075	F	52	PRJNA604975	SAMN18257645
OX-BSI-234_11	543fd233-a13b-4616-ad19-d0dd75da4142	543fd233-a13b-4616-ad19-d0dd75da4142_11	Plasmid	BSI	1822	44.51	ecoli	69	NA	NA	146	4	NA	NA	Col(MG828)_1	NA	-	-	-	non-mobilizable	-	-	1	NA	NA	NA	2018-04-10	healthcare associated 31-365d	K84610	F	85	PRJNA604975	SAMN18257643
OX-BSI-234_2	543fd233-a13b-4616-ad19-d0dd75da4142	543fd233-a13b-4616-ad19-d0dd75da4142_2	Plasmid	BSI	267133	50.52	ecoli	69	NA	NA	NA	NA	NA	NA	NA	arsT-BAC0714,corC-BAC0088,cusA/ybdE-BAC0107,cusB-BAC0108,cusC/ylcB-BAC0109,cusF/cusX-BAC0110,cusR/ylcA-BAC0111,cusS-BAC0112,cutE/lnt-BAC0115,fecE-BAC0164,gadW/yhiW-BAC0176,galE-BAC0755,modA-BAC0609,modB-BAC0610,modC-BAC0611,modE-BAC0608,opmD/nmpC-BAC0290,oxyRkp-BAC0536,phoB-BAC0530,zitB/ybgR-BAC0459	-	-	-	non-mobilizable	-	-	1	NA	NA	NA	2018-04-10	healthcare associated 31-365d	K84610	F	85	PRJNA604975	SAMN18257643
OX-BSI-234_9	543fd233-a13b-4616-ad19-d0dd75da4142	543fd233-a13b-4616-ad19-d0dd75da4142_9	Plasmid	BSI	5210	48.58	ecoli	69	NA	NA	147	4	NA	NA	ColRNAI_1	NA	MOBP	-	MOBP	mobilizable	PTU-E1	III	1	NA	NA	NA	2018-04-10	healthcare associated 31-365d	K84610	F	85	PRJNA604975	SAMN18257643
OX-BSI-234_6	543fd233-a13b-4616-ad19-d0dd75da4142	543fd233-a13b-4616-ad19-d0dd75da4142_6	Plasmid	BSI	28988	41.32	ecoli	69	NA	NA	60	10	NA	NA	NA	NA	-	-	-	non-mobilizable	-	-	1	NA	NA	NA	2018-04-10	healthcare associated 31-365d	K84610	F	85	PRJNA604975	SAMN18257643
OX-BSI-234_7	543fd233-a13b-4616-ad19-d0dd75da4142	543fd233-a13b-4616-ad19-d0dd75da4142_7	Plasmid	BSI	7462	48.31	ecoli	69	NA	NA	54	11	NA	NA	Col156_1	NA	MOBQ	-	-	mobilizable	PTU-E7	III	1	NA	NA	NA	2018-04-10	healthcare associated 31-365d	K84610	F	85	PRJNA604975	SAMN18257643
OX-BSI-234_10	543fd233-a13b-4616-ad19-d0dd75da4142	543fd233-a13b-4616-ad19-d0dd75da4142_10	Plasmid	BSI	4070	49.8	ecoli	69	NA	NA	9	51	NA	NA	Col8282_1	NA	MOBQ	-	MOBQ,MOBQ	mobilizable	PTU-E10	III	1	NA	NA	NA	2018-04-10	healthcare associated 31-365d	K84610	F	85	PRJNA604975	SAMN18257643
OX-BSI-234_1	543fd233-a13b-4616-ad19-d0dd75da4142	543fd233-a13b-4616-ad19-d0dd75da4142_chromo	Chromosome	BSI	4932698	50.75	ecoli	69	NA	NA	NA	NA	NA	IS1203,IS1A,IS1F,IS2,IS30,IS911,ISEc22,ISEc43,ISEc45,ISEc46,ISEc8	NA	acn-BAC0003,acrA-BAC0005,acrB-BAC0006,acrD/yffA-BAC0008,acrE/envC-BAC0009,acrF/envD-BAC0010,actP/yjcG-BAC0564,arsA-BAC0571,arsB-BAC0576,arsC-BAC0582,arsC-BAC0583,arsD-BAC0587,arsP-BAC0036,arsR-BAC0594,arsT-BAC0714,asr-BAC0038,baeS-BAC0040,bhsA/ycfR/comC-BAC0049,comR/ycfQ-BAC0076,copA-BAC0725,copS-BAC0752,corA-BAC0086,corB-BAC0643,corC-BAC0088,corD-BAC0644,cpxA-BAC0532,cueO-BAC0103,cueR/ybbI-BAC01…	NA	NA	NA	NA	NA	NA	NA	NA	NA	NA	2018-04-10	healthcare associated 31-365d	K84610	F	85	PRJNA604975	SAMN18257643
OX-BSI-234_8	543fd233-a13b-4616-ad19-d0dd75da4142	543fd233-a13b-4616-ad19-d0dd75da4142_8	Plasmid	BSI	6647	48.53	ecoli	69	NA	NA	17	35	NA	NA	ColRNAI_1	NA	MOBP	-	MOBP	mobilizable	PTU-E1	III	0.9756	NA	NA	NA	2018-04-10	healthcare associated 31-365d	K84610	F	85	PRJNA604975	SAMN18257643
OX-BSI-234_3	543fd233-a13b-4616-ad19-d0dd75da4142	543fd233-a13b-4616-ad19-d0dd75da4142_3	Plasmid	BSI	149116	52.34	ecoli	69	NA	NA	1	123	aadA5,aph(3'')-Ib,aph(6)-Id,blaTEM-1,dfrA17,mph(A),qacEdelta1,sul1,sul2,tet(B)	IS100kyp,IS21,ISEc53	Col156_1,IncFIB(AP001918)_1,IncFII(29)_1_pUTI89	blt-BAC0050,merA-BAC0652,merC-BAC0664,merE-BAC0670,merP-BAC0678,merR-BAC0232,merT-BAC0693,qacEdelta1-BAC0323	MOBF,MOBF,MOBP	MPF_F	MOBF	conjugative	PTU-FE	III	1	NA	NA	NA	2018-04-10	healthcare associated 31-365d	K84610	F	85	PRJNA604975	SAMN18257643
OX-BSI-234_4	543fd233-a13b-4616-ad19-d0dd75da4142	543fd233-a13b-4616-ad19-d0dd75da4142_4	Plasmid	BSI	90738	52.68	ecoli	69	NA	NA	7	58	NA	IS629	IncB/O/K/Z_2	NA	MOBP	MPF_I	MOBP	conjugative	PTU-B/O/K/Z	III	0.9545	NA	NA	NA	2018-04-10	healthcare associated 31-365d	K84610	F	85	PRJNA604975	SAMN18257643
OX-BSI-234_5	543fd233-a13b-4616-ad19-d0dd75da4142	543fd233-a13b-4616-ad19-d0dd75da4142_5	Plasmid	BSI	34185	41.97	ecoli	69	NA	NA	97	6	NA	NA	IncX1_1	triA-BAC0396,triC-BAC0398	MOBP	MPF_T	-	conjugative	-	-	1	NA	NA	NA	2018-04-10	healthcare associated 31-365d	K84610	F	85	PRJNA604975	SAMN18257643
OX-BSI-235_1	5450515a-d3b9-4ab2-809f-42358f892675	5450515a-d3b9-4ab2-809f-42358f892675_chromo	Chromosome	BSI	5374747	57.38	kpneumoniae	490	NA	NA	NA	NA	blaSHV-1,fosA,oqxA,oqxB	IS5075,ISKpn26,Tn5403	NA	acn-BAC0003,acrA-BAC0005,acrB-BAC0006,acrC-BAC0007,acrD-BAC0563,acrE/envC-BAC0009,acrF/envD-BAC0010,actP/yjcG-BAC0564,adeE-BAC0013,arsB-BAC0578,arsC-BAC0582,arsC-BAC0583,arsR-BAC0589,baeR-BAC0596,baeS-BAC0040,bepG-BAC0046,bfrA-BAC0048,bhsA/ycfR/comC-BAC0049,cepA-BAC0061,comR/ycfQ-BAC0076,copA-BAC0725,corA-BAC0086,corB-BAC0643,corD-BAC0644,corR-BAC0089,cpxA-BAC0532,cueR/ybbI-BAC0105,cusA/ybdE-BAC0…	NA	NA	NA	NA	NA	NA	NA	NA	NA	NA	2009-07-30	nosocomial	K84034	F	50	PRJNA604975	NA
OX-BSI-235_5	5450515a-d3b9-4ab2-809f-42358f892675	5450515a-d3b9-4ab2-809f-42358f892675_5	Plasmid	BSI	9553	51.74	kpneumoniae	490	5	32	18	34	NA	NA	NA	NA	MOBP	-	-	mobilizable	-	-	1	NA	NA	NA	2009-07-30	nosocomial	K84034	F	50	PRJNA604975	NA
OX-BSI-235_6	5450515a-d3b9-4ab2-809f-42358f892675	5450515a-d3b9-4ab2-809f-42358f892675_6	Plasmid	BSI	5366	52.42	kpneumoniae	490	NA	NA	83	7	NA	NA	NA	NA	-	-	-	non-mobilizable	-	-	1	NA	NA	NA	2009-07-30	nosocomial	K84034	F	50	PRJNA604975	NA
OX-BSI-235_4	5450515a-d3b9-4ab2-809f-42358f892675	5450515a-d3b9-4ab2-809f-42358f892675_4	Plasmid	BSI	19078	47.57	kpneumoniae	490	NA	NA	20	32	NA	IS1X4,ISSen4,Tn5403	IncFIA(HI1)_1_HI1	NA	-	-	MOBF	mobilizable	-	-	1	NA	NA	NA	2009-07-30	nosocomial	K84034	F	50	PRJNA604975	NA
OX-BSI-235_3	5450515a-d3b9-4ab2-809f-42358f892675	5450515a-d3b9-4ab2-809f-42358f892675_3	Plasmid	BSI	113411	52.81	kpneumoniae	490	NA	NA	13	41	aac(6')-Ib-cr5,blaOXA-1,catB3,dfrA14,qnrB1,tet(A)	IS102,IS6100,Tn5403	IncFII_1_pKP91	blt-BAC0050	MOBF,MOBF	MPF_F	-	conjugative	PTU-FK	III	0.9922	NA	NA	NA	2009-07-30	nosocomial	K84034	F	50	PRJNA604975	NA
OX-BSI-235_2	5450515a-d3b9-4ab2-809f-42358f892675	5450515a-d3b9-4ab2-809f-42358f892675_2	Plasmid	BSI	224365	51.11	kpneumoniae	490	NA	NA	19	33	NA	IS1A,IS1X4,IS903,ISEc21,ISEc36,ISKox1,ISKpn2,ISKpn21,ISKpn24,ISSen3	IncFIB(K)_1_Kpn3	copG-BAC0717,fecE-BAC0164,pcoA-BAC0303,pcoB-BAC0304,pcoC-BAC0305,pcoD-BAC0306,pcoE-BAC0307,pcoR-BAC0308,pcoS-BAC0309,pstB-BAC0316,silA-BAC0341,silB-BAC0342,silC-BAC0343,silE-BAC0344,silF-BAC0345,silP-BAC0346,silR-BAC0347,silS-BAC0348	-	-	-	non-mobilizable	PTU-E35	I	1	NA	NA	NA	2009-07-30	nosocomial	K84034	F	50	PRJNA604975	NA
OX-BSI-236_3	54988350-0e74-4175-bb28-5c4a782e1de5	54988350-0e74-4175-bb28-5c4a782e1de5_3	Plasmid	BSI	5167	47.55	ecoli	69	21	3	4	69	NA	NA	Col156_1	NA	MOBQ	-	-	mobilizable	PTU-E7	III	1	NA	NA	NA	2018-07-15	community	K84040	F	69	PRJNA604975	SAMN18257637
OX-BSI-236_2	54988350-0e74-4175-bb28-5c4a782e1de5	54988350-0e74-4175-bb28-5c4a782e1de5_2	Plasmid	BSI	134470	52.37	ecoli	69	NA	NA	5	68	aph(3'')-Ib,aph(6)-Id,blaTEM-1,dfrA14,mph(A),sul2	IS100kyp,IS1A,IS1B,IS1X2,IS5,IS5075	Col156_1,IncFIA_1,IncFIB(AP001918)_1,IncFII(pRSB107)_1_pRSB107	merA-BAC0652,merC-BAC0664,merD-BAC0666,merE-BAC0670,merP-BAC0678,merR-BAC0232,merT-BAC0693	MOBF,MOBP	MPF_F	MOBF	conjugative	PTU-FE	III	0.9941	NA	NA	NA	2018-07-15	community	K84040	F	69	PRJNA604975	SAMN18257637
OX-BSI-236_1	54988350-0e74-4175-bb28-5c4a782e1de5	54988350-0e74-4175-bb28-5c4a782e1de5_chromo	Chromosome	BSI	5245578	50.68	ecoli	69	NA	NA	NA	NA	tet(B)	IS1F,IS5,ISEc31,ISEc46,ISEc48,ISEc8,ISSfl8,ISVsa5	NA	acn-BAC0003,acrA-BAC0005,acrB-BAC0006,acrD/yffA-BAC0008,acrE/envC-BAC0009,acrF/envD-BAC0010,actP/yjcG-BAC0564,arsA-BAC0571,arsB-BAC0576,arsC-BAC0582,arsC-BAC0583,arsD-BAC0587,arsP-BAC0036,arsR-BAC0594,asr-BAC0038,baeS-BAC0040,bfrA-BAC0048,bhsA/ycfR/comC-BAC0049,blt-BAC0050,comR/ycfQ-BAC0076,copA-BAC0725,copS-BAC0752,corA-BAC0086,corB-BAC0643,corD-BAC0644,cpxA-BAC0532,cueO-BAC0103,cueR/ybbI-BAC010…	NA	NA	NA	NA	NA	NA	NA	NA	NA	NA	2018-07-15	community	K84040	F	69	PRJNA604975	SAMN18257637
OX-BSI-237_1	54a1f115-3ae8-4824-b77b-95df499f6904	54a1f115-3ae8-4824-b77b-95df499f6904_chromo	Chromosome	BSI	5106150	50.62	ecoli	302	NA	NA	NA	NA	NA	IS1203,IS200C,IS30,ISEc8	NA	acn-BAC0003,acrA-BAC0005,acrB-BAC0006,acrD/yffA-BAC0008,acrE/envC-BAC0009,actP/yjcG-BAC0564,arsC-BAC0583,arsC-BAC0584,asr-BAC0038,baeS-BAC0040,bfrA-BAC0048,bhsA/ycfR/comC-BAC0049,comR/ycfQ-BAC0076,copA-BAC0725,corA-BAC0086,corB-BAC0643,corD-BAC0644,corR-BAC0089,cpxA-BAC0532,cueO-BAC0103,cueR/ybbI-BAC0105,cusA/ybdE-BAC0107,cusB-BAC0108,cusC/ylcB-BAC0109,cusF/cusX-BAC0110,cusR/ylcA-BAC0111,cusS-BAC…	NA	NA	NA	NA	NA	NA	NA	NA	NA	NA	2018-08-14	community	K84055	F	95	PRJNA604975	SAMN18257636
OX-BSI-237_2	54a1f115-3ae8-4824-b77b-95df499f6904	54a1f115-3ae8-4824-b77b-95df499f6904_2	Plasmid	BSI	81692	49.02	ecoli	302	NA	NA	NA	NA	NA	IS91,ISCro3	IncFIB(AP001918)_1	NA	MOBF	MPF_F	MOBF	conjugative	PTU-E5	I	1	NA	NA	NA	2018-08-14	community	K84055	F	95	PRJNA604975	SAMN18257636
OX-BSI-238_1	5510c3c5-5101-44b5-a3b6-6ea3c8bf34ba	5510c3c5-5101-44b5-a3b6-6ea3c8bf34ba_chromo	Chromosome	BSI	4988077	50.62	ecoli	12	NA	NA	NA	NA	NA	IS100kyp,IS1203,IS150,IS1B,IS200C,IS621,IS682,ISEc13,ISEc16,ISEc20,ISEc22,ISEc40,ISEc41,ISEc42,ISEc48,ISEc49,ISSen4	NA	acn-BAC0003,acrA-BAC0005,acrE/envC-BAC0009,acrF/envD-BAC0010,actP/yjcG-BAC0564,arsC-BAC0582,arsC-BAC0583,asr-BAC0038,baeS-BAC0040,bfrA-BAC0048,bhsA/ycfR/comC-BAC0049,comR/ycfQ-BAC0076,copA-BAC0725,corA-BAC0086,corB-BAC0643,corD-BAC0644,cpxA-BAC0532,cueO-BAC0103,cueR/ybbI-BAC0105,cusA/ybdE-BAC0107,cusB-BAC0108,cusC/ylcB-BAC0109,cusF/cusX-BAC0110,cusR/ylcA-BAC0111,cusS-BAC0112,cutA-BAC0113,cutC-BAC…	NA	NA	NA	NA	NA	NA	NA	NA	NA	NA	2018-04-30	healthcare associated 31-365d	K84048	M	94	PRJNA604975	SAMN18257631
OX-BSI-238_2	5510c3c5-5101-44b5-a3b6-6ea3c8bf34ba	5510c3c5-5101-44b5-a3b6-6ea3c8bf34ba_2	Plasmid	BSI	137023	51.32	ecoli	12	NA	NA	5	68	aadA2,blaCARB-2,qacEdelta1,sul1	IS100kyp,IS150,IS1A,IS1X2,IS5,ISEc10,ISEc12,ISKpn26	Col156_1,IncFIA_1,IncFIB(AP001918)_1,IncFII(pRSB107)_1_pRSB107	qacEdelta1-BAC0323	MOBF,MOBP	MPF_F	MOBF	conjugative	PTU-FE	III	0.994	NA	NA	NA	2018-04-30	healthcare associated 31-365d	K84048	M	94	PRJNA604975	SAMN18257631
OX-BSI-239_6	581d3616-a29e-4ef3-bc78-dbce163df530	581d3616-a29e-4ef3-bc78-dbce163df530_6	Plasmid	BSI	5452	44.41	ecoli	95	NA	NA	NA	NA	NA	NA	ColRNAI_1	NA	-	-	MOBP	mobilizable	-	-	1	NA	NA	NA	2018-09-04	community	K84080	F	92	PRJNA604975	SAMN18257601
OX-BSI-239_1	581d3616-a29e-4ef3-bc78-dbce163df530	581d3616-a29e-4ef3-bc78-dbce163df530_chromo	Chromosome	BSI	4847167	50.7	ecoli	95	NA	NA	NA	NA	NA	IS1203,IS1397,IS150,IS1F,IS2,IS200C,IS4,IS621,IS911,ISEc30,ISEc38,ISEc48,ISSd1	NA	acn-BAC0003,acrA-BAC0005,acrD/yffA-BAC0008,acrE/envC-BAC0009,acrF/envD-BAC0010,actP/yjcG-BAC0564,arsC-BAC0582,arsC-BAC0583,asr-BAC0038,baeS-BAC0040,bfrA-BAC0048,bhsA/ycfR/comC-BAC0049,comR/ycfQ-BAC0076,copA-BAC0725,copS-BAC0752,corA-BAC0086,corB-BAC0643,corD-BAC0644,cpxA-BAC0532,cueO-BAC0103,cueR/ybbI-BAC0105,cusA/ybdE-BAC0107,cusB-BAC0108,cusC/ylcB-BAC0109,cusF/cusX-BAC0110,cusR/ylcA-BAC0111,cus…	NA	NA	NA	NA	NA	NA	NA	NA	NA	NA	2018-09-04	community	K84080	F	92	PRJNA604975	SAMN18257601
OX-BSI-239_5	581d3616-a29e-4ef3-bc78-dbce163df530	581d3616-a29e-4ef3-bc78-dbce163df530_5	Plasmid	BSI	6989	47.57	ecoli	95	NA	NA	120	5	NA	NA	ColRNAI_1	NA	MOBP	-	MOBP	mobilizable	PTU-E14	III	0.9	NA	NA	NA	2018-09-04	community	K84080	F	92	PRJNA604975	SAMN18257601
OX-BSI-239_3	581d3616-a29e-4ef3-bc78-dbce163df530	581d3616-a29e-4ef3-bc78-dbce163df530_3	Plasmid	BSI	131332	49.33	ecoli	95	NA	NA	2	100	NA	IS2,IS629,ISEc32	IncFIB(AP001918)_1	sitA-BAC0349,sitB-BAC0350,sitC-BAC0351,sitD-BAC0352,smdB-BAC0354,tupC-BAC0607	MOBF	MPF_F	MOBF	conjugative	PTU-FE	III	1	NA	NA	NA	2018-09-04	community	K84080	F	92	PRJNA604975	SAMN18257601
OX-BSI-239_4	581d3616-a29e-4ef3-bc78-dbce163df530	581d3616-a29e-4ef3-bc78-dbce163df530_4	Plasmid	BSI	63402	51.65	ecoli	95	NA	NA	12	42	NA	IS26	IncFII_1	NA	MOBF	MPF_F	MOBP	conjugative	PTU-FE	III	1	NA	NA	NA	2018-09-04	community	K84080	F	92	PRJNA604975	SAMN18257601
OX-BSI-239_2	581d3616-a29e-4ef3-bc78-dbce163df530	581d3616-a29e-4ef3-bc78-dbce163df530_2	Plasmid	BSI	149991	49.64	ecoli	95	NA	NA	NA	NA	NA	NA	NA	dsbB-BAC0137,evgA-BAC0154,fecD-BAC0163,fecE-BAC0164,nikB-BAC0271,nikC-BAC0272,nikD-BAC0273,nikE-BAC0274,sitA-BAC0349,sitB-BAC0350,sitC-BAC0351,sitD-BAC0352,ychH-BAC0434,ymgB/ariR-BAC0450	-	-	-	non-mobilizable	-	-	1	NA	NA	NA	2018-09-04	community	K84080	F	92	PRJNA604975	SAMN18257601
OX-BSI-240_3	58907c22-a3bd-4520-8b8d-458df8a8ab1c	58907c22-a3bd-4520-8b8d-458df8a8ab1c_3	Plasmid	BSI	3173	46.9	ecoli	73	NA	NA	32	19	NA	NA	ColRNAI_1	NA	MOBF	-	MOB_unknown	mobilizable	PTU-E1	III	0.9756	NA	NA	NA	2009-09-10	community	K84027	M	85	PRJNA604975	SAMN18257596
OX-BSI-240_2	58907c22-a3bd-4520-8b8d-458df8a8ab1c	58907c22-a3bd-4520-8b8d-458df8a8ab1c_2	Plasmid	BSI	6647	48.56	ecoli	73	NA	NA	17	35	NA	NA	ColRNAI_1	NA	MOBP,MOBP	-	MOBP	mobilizable	PTU-E1	III	0.75	NA	NA	NA	2009-09-10	community	K84027	M	85	PRJNA604975	SAMN18257596
OX-BSI-240_1	58907c22-a3bd-4520-8b8d-458df8a8ab1c	58907c22-a3bd-4520-8b8d-458df8a8ab1c_chromo	Chromosome	BSI	4973643	50.61	ecoli	73	NA	NA	NA	NA	blaEC-5	IS100kyp,IS1203,IS1F,IS630,ISEc20,ISEc39,ISEc41,ISEc42,ISEc45,ISEc8	NA	acn-BAC0003,acrA-BAC0005,acrD/yffA-BAC0008,acrE/envC-BAC0009,acrF/envD-BAC0010,actP/yjcG-BAC0564,arsC-BAC0582,arsC-BAC0583,asr-BAC0038,baeS-BAC0040,bfrA-BAC0048,bhsA/ycfR/comC-BAC0049,comR/ycfQ-BAC0076,copA-BAC0725,corA-BAC0086,corB-BAC0643,corD-BAC0644,cpxA-BAC0532,cueO-BAC0103,cueR/ybbI-BAC0105,cusA/ybdE-BAC0107,cusB-BAC0108,cusC/ylcB-BAC0109,cusF/cusX-BAC0110,cusR/ylcA-BAC0111,cusS-BAC0112,cut…	NA	NA	NA	NA	NA	NA	NA	NA	NA	NA	2009-09-10	community	K84027	M	85	PRJNA604975	SAMN18257596
OX-BSI-241_2	58a3e8ce-69f7-4ed5-92e4-a18b9b1ad291	58a3e8ce-69f7-4ed5-92e4-a18b9b1ad291_2	Plasmid	BSI	244384	52.26	kpneumoniae	870	NA	NA	16	37	NA	IS102,IS1F,IS1X3,ISEcl1,ISSen4	IncFIB(K)_1_Kpn3,IncFII_1_pKP91	arsA-BAC0571,arsC-BAC0582,arsC-BAC0584,arsH-BAC0034,arsR-BAC0589,arsR-BAC0591,copG-BAC0717,fecE-BAC0164,merA-BAC0652,merD-BAC0666,merE-BAC0672,merF-BAC0228,merP-BAC0231,merR2-BAC0688,merT-BAC0691,nikB-BAC0271,nikC-BAC0272,nikD-BAC0273,pcoA-BAC0303,pcoB-BAC0304,pcoC-BAC0305,pcoD-BAC0306,pcoE-BAC0307,pcoR-BAC0308,pcoS-BAC0309,silA-BAC0341,silB-BAC0342,silC-BAC0343,silE-BAC0344,silF-BAC0345,silP-BAC…	MOBF,MOBF	MPF_F	-	conjugative	PTU-FK	III	1	NA	NA	NA	2013-09-22	community	K84017	F	30	PRJNA604975	NA
OX-BSI-241_3	58a3e8ce-69f7-4ed5-92e4-a18b9b1ad291	58a3e8ce-69f7-4ed5-92e4-a18b9b1ad291_3	Plasmid	BSI	4905	52.58	kpneumoniae	870	NA	NA	NA	NA	NA	NA	NA	NA	MOBP	-	-	mobilizable	PTU-?	IV	1	NA	NA	NA	2013-09-22	community	K84017	F	30	PRJNA604975	NA
OX-BSI-241_1	58a3e8ce-69f7-4ed5-92e4-a18b9b1ad291	58a3e8ce-69f7-4ed5-92e4-a18b9b1ad291_chromo	Chromosome	BSI	5217007	57.58	kpneumoniae	870	NA	NA	NA	NA	blaSHV-1,fosA,oqxA,oqxB	IS1400	NA	acn-BAC0003,acrA-BAC0005,acrB-BAC0006,acrC-BAC0007,acrD-BAC0563,acrE/envC-BAC0009,acrF/envD-BAC0010,actP/yjcG-BAC0564,adeE-BAC0013,arsB-BAC0578,arsC-BAC0582,arsC-BAC0583,arsR-BAC0589,baeR-BAC0596,baeS-BAC0040,bepG-BAC0046,bfrA-BAC0048,bhsA/ycfR/comC-BAC0049,cepA-BAC0061,comR/ycfQ-BAC0076,copA-BAC0725,corA-BAC0086,corB-BAC0643,corD-BAC0644,corR-BAC0089,cpxA-BAC0532,cueR/ybbI-BAC0105,cusA/ybdE-BAC0…	NA	NA	NA	NA	NA	NA	NA	NA	NA	NA	2013-09-22	community	K84017	F	30	PRJNA604975	NA
OX-BSI-242_1	58ca2a63-3fd7-4745-b284-f6ead48aebd9_contig	58ca2a63-3fd7-4745-b284-f6ead48aebd9_contig_chromo	Chromosome	BSI	4986175	50.63	ecoli	95	NA	NA	NA	NA	NA	IS1203,IS1397,IS150,IS1F,IS200C,IS621,ISEc30,ISEc38,ISEc48,ISEc8,ISSd1	NA	acn-BAC0003,acrA-BAC0005,acrB-BAC0006,acrD/yffA-BAC0008,acrE/envC-BAC0009,acrF/envD-BAC0010,actP/yjcG-BAC0564,arsC-BAC0582,arsC-BAC0583,asr-BAC0038,baeS-BAC0040,bfrA-BAC0048,bhsA/ycfR/comC-BAC0049,comR/ycfQ-BAC0076,copA-BAC0725,corA-BAC0086,corB-BAC0643,corD-BAC0644,cpxA-BAC0532,cueO-BAC0103,cueR/ybbI-BAC0105,cusA/ybdE-BAC0107,cusB-BAC0108,cusC/ylcB-BAC0109,cusF/cusX-BAC0110,cusR/ylcA-BAC0111,cus…	NA	NA	NA	NA	NA	NA	NA	NA	NA	NA	NA	NA	NA	NA	NA	PRJNA604975	SAMN18257595
OX-BSI-242_3	58ca2a63-3fd7-4745-b284-f6ead48aebd9_contig	58ca2a63-3fd7-4745-b284-f6ead48aebd9_contig_3	Plasmid	BSI	8138	49.9	ecoli	95	NA	NA	9	51	NA	NA	NA	NA	MOBQ	-	MOBQ,MOBQ	mobilizable	PTU-E10	III	1	NA	NA	NA	NA	NA	NA	NA	NA	PRJNA604975	SAMN18257595
OX-BSI-242_2	58ca2a63-3fd7-4745-b284-f6ead48aebd9_contig	58ca2a63-3fd7-4745-b284-f6ead48aebd9_contig_2	Plasmid	BSI	133950	49.29	ecoli	95	229	2	2	100	NA	IS2,IS629,ISEc12,ISEc32	IncFIB(AP001918)_1	sitA-BAC0349,sitB-BAC0350,sitC-BAC0351,sitD-BAC0352,smdB-BAC0354,tupC-BAC0607	MOBF	MPF_F	MOBF	conjugative	PTU-FE	III	1	NA	NA	NA	NA	NA	NA	NA	NA	PRJNA604975	SAMN18257595
OX-BSI-242_4	58ca2a63-3fd7-4745-b284-f6ead48aebd9_contig	58ca2a63-3fd7-4745-b284-f6ead48aebd9_contig_4	Plasmid	BSI	1547	51.45	ecoli	95	NA	NA	8	57	NA	NA	Col(MG828)_1	NA	-	-	MOB_unknown,MOBP	mobilizable	PTU-E9	VI	1	NA	NA	NA	NA	NA	NA	NA	NA	PRJNA604975	SAMN18257595
OX-BSI-243_3	58fb178b-2103-40b4-a8df-1f604d431bd2	58fb178b-2103-40b4-a8df-1f604d431bd2_3	Plasmid	BSI	95183	48.29	ecoli	95	NA	NA	64	10	NA	NA	IncY_1	NA	-	-	-	non-mobilizable	PTU-Y	III	0.9474	NA	NA	NA	2009-05-09	healthcare associated 0-30d	K84010	F	79	PRJNA604975	SAMN18257590
OX-BSI-243_5	58fb178b-2103-40b4-a8df-1f604d431bd2	58fb178b-2103-40b4-a8df-1f604d431bd2_5	Plasmid	BSI	1918	48.33	ecoli	95	NA	NA	NA	NA	NA	NA	NA	NA	-	-	-	non-mobilizable	-	-	1	NA	NA	NA	2009-05-09	healthcare associated 0-30d	K84010	F	79	PRJNA604975	SAMN18257590
OX-BSI-243_4	58fb178b-2103-40b4-a8df-1f604d431bd2	58fb178b-2103-40b4-a8df-1f604d431bd2_4	Plasmid	BSI	87107	53.04	ecoli	95	NA	NA	7	58	blaTEM-1	Tn3	IncB/O/K/Z_2	NA	MOBP	MPF_I	MOBP	conjugative	PTU-B/O/K/Z	III	1	NA	NA	NA	2009-05-09	healthcare associated 0-30d	K84010	F	79	PRJNA604975	SAMN18257590
OX-BSI-243_1	58fb178b-2103-40b4-a8df-1f604d431bd2	58fb178b-2103-40b4-a8df-1f604d431bd2_chromo	Chromosome	BSI	5226239	50.36	ecoli	95	NA	NA	NA	NA	NA	IS100kyp,IS1203,IS1397,IS200C,IS621,ISEc20,ISEc30,ISEc38,ISEc40,ISEc45,ISEc48,ISEc8	NA	acn-BAC0003,acrA-BAC0005,acrD/yffA-BAC0008,acrE/envC-BAC0009,acrF/envD-BAC0010,actP/yjcG-BAC0564,arsC-BAC0582,arsC-BAC0583,asr-BAC0038,baeS-BAC0040,bfrA-BAC0048,bhsA/ycfR/comC-BAC0049,comR/ycfQ-BAC0076,copA-BAC0725,copS-BAC0752,corA-BAC0086,corB-BAC0643,corD-BAC0644,cpxA-BAC0532,cueO-BAC0103,cueR/ybbI-BAC0105,cusA/ybdE-BAC0107,cusB-BAC0108,cusC/ylcB-BAC0109,cusF/cusX-BAC0110,cusR/ylcA-BAC0111,cus…	NA	NA	NA	NA	NA	NA	NA	NA	NA	NA	2009-05-09	healthcare associated 0-30d	K84010	F	79	PRJNA604975	SAMN18257590
OX-BSI-243_2	58fb178b-2103-40b4-a8df-1f604d431bd2	58fb178b-2103-40b4-a8df-1f604d431bd2_2	Plasmid	BSI	114229	51.03	ecoli	95	NA	NA	1	123	NA	IS100kyp,IS21,IS26,ISEc10,ISEc53	Col156_1,IncFIB(AP001918)_1,IncFII(29)_1_pUTI89	NA	MOBF,MOBP	MPF_F	MOBF	conjugative	PTU-FE	III	1	NA	NA	NA	2009-05-09	healthcare associated 0-30d	K84010	F	79	PRJNA604975	SAMN18257590
OX-BSI-244_6	5946d639-dfeb-4164-9b42-c8b35fab9560	5946d639-dfeb-4164-9b42-c8b35fab9560_6	Plasmid	BSI	5147	47.19	ecoli	-	NA	NA	55	11	NA	NA	Col156_1	NA	MOBQ	-	-	mobilizable	PTU-E7	III	1	NA	NA	NA	2009-09-25	healthcare associated 0-30d	K84059	F	63	PRJNA604975	SAMN18257495
OX-BSI-244_1	5946d639-dfeb-4164-9b42-c8b35fab9560	5946d639-dfeb-4164-9b42-c8b35fab9560_chromo	Chromosome	BSI	5028524	50.61	ecoli	-	NA	NA	NA	NA	blaEC-5	IS1203,IS30,IS629,IS630,ISEc20,ISEc39,ISEc40,ISEc41,ISEc42	NA	acn-BAC0003,acrA-BAC0005,acrD/yffA-BAC0008,acrE/envC-BAC0009,acrF/envD-BAC0010,actP/yjcG-BAC0564,arsC-BAC0582,arsC-BAC0583,asr-BAC0038,baeS-BAC0040,bfrA-BAC0048,bhsA/ycfR/comC-BAC0049,comR/ycfQ-BAC0076,copA-BAC0725,corA-BAC0086,corB-BAC0643,corD-BAC0644,cpxA-BAC0532,cueO-BAC0103,cueR/ybbI-BAC0105,cusA/ybdE-BAC0107,cusB-BAC0108,cusC/ylcB-BAC0109,cusF/cusX-BAC0110,cusR/ylcA-BAC0111,cusS-BAC0112,cut…	NA	NA	NA	NA	NA	NA	NA	NA	NA	NA	2009-09-25	healthcare associated 0-30d	K84059	F	63	PRJNA604975	SAMN18257495
OX-BSI-244_7	5946d639-dfeb-4164-9b42-c8b35fab9560	5946d639-dfeb-4164-9b42-c8b35fab9560_7	Plasmid	BSI	1552	51.8	ecoli	-	9	5	6	62	NA	NA	Col(MG828)_1	NA	-	-	MOB_unknown	mobilizable	PTU-E9	VI	1	NA	NA	NA	2009-09-25	healthcare associated 0-30d	K84059	F	63	PRJNA604975	SAMN18257495
OX-BSI-244_4	5946d639-dfeb-4164-9b42-c8b35fab9560	5946d639-dfeb-4164-9b42-c8b35fab9560_4	Plasmid	BSI	82726	53.12	ecoli	-	NA	NA	7	58	NA	NA	IncB/O/K/Z_2	NA	MOBP	MPF_I	MOBP	conjugative	PTU-B/O/K/Z	III	1	NA	NA	NA	2009-09-25	healthcare associated 0-30d	K84059	F	63	PRJNA604975	SAMN18257495
OX-BSI-244_5	5946d639-dfeb-4164-9b42-c8b35fab9560	5946d639-dfeb-4164-9b42-c8b35fab9560_5	Plasmid	BSI	5631	47.38	ecoli	-	NA	NA	11	43	NA	NA	ColRNAI_1	NA	MOBP	-	MOBP	mobilizable	PTU-E22	I	1	NA	NA	NA	2009-09-25	healthcare associated 0-30d	K84059	F	63	PRJNA604975	SAMN18257495
OX-BSI-244_2	5946d639-dfeb-4164-9b42-c8b35fab9560	5946d639-dfeb-4164-9b42-c8b35fab9560_2	Plasmid	BSI	114224	51.03	ecoli	-	NA	NA	1	123	NA	IS100kyp,IS21,IS26,ISEc10,ISEc53	Col156_1,IncFIB(AP001918)_1,IncFII(29)_1_pUTI89	NA	MOBF,MOBP	MPF_F	MOBF	conjugative	PTU-FE	III	1	NA	NA	NA	2009-09-25	healthcare associated 0-30d	K84059	F	63	PRJNA604975	SAMN18257495
OX-BSI-244_3	5946d639-dfeb-4164-9b42-c8b35fab9560	5946d639-dfeb-4164-9b42-c8b35fab9560_3	Plasmid	BSI	87484	52.6	ecoli	-	NA	NA	7	58	NA	NA	IncB/O/K/Z_1	NA	MOBP	MPF_I	MOBP	conjugative	PTU-B/O/K/Z	III	1	NA	NA	NA	2009-09-25	healthcare associated 0-30d	K84059	F	63	PRJNA604975	SAMN18257495
OX-BSI-245_1	5955c9f3-c3c9-413f-ba79-7c6a60e1fef3_contig	5955c9f3-c3c9-413f-ba79-7c6a60e1fef3_contig_chromo	Chromosome	BSI	5118661	50.43	ecoli	-	NA	NA	NA	NA	blaEC-5	IS100kyp,IS1F,IS200C,IS30,IS630,IS682,ISEc13,ISEc16,ISEc17,ISEc20,ISEc21,ISEc31,ISEc39,ISEc41,ISEc42	NA	acn-BAC0003,acrA-BAC0005,acrB-BAC0006,acrD/yffA-BAC0008,acrE/envC-BAC0009,acrF/envD-BAC0010,actP/yjcG-BAC0564,adeE-BAC0013,arsC-BAC0582,arsC-BAC0583,asr-BAC0038,baeS-BAC0040,bfrA-BAC0048,bhsA/ycfR/comC-BAC0049,comR/ycfQ-BAC0076,copA-BAC0725,corA-BAC0086,corB-BAC0643,corD-BAC0644,cpxA-BAC0532,cueO-BAC0103,cueR/ybbI-BAC0105,cusA/ybdE-BAC0107,cusB-BAC0108,cusC/ylcB-BAC0109,cusF/cusX-BAC0110,cusR/ylc…	NA	NA	NA	NA	NA	NA	NA	NA	NA	NA	NA	NA	NA	NA	NA	PRJNA604975	NA
OX-BSI-245_4	5955c9f3-c3c9-413f-ba79-7c6a60e1fef3_contig	5955c9f3-c3c9-413f-ba79-7c6a60e1fef3_contig_4	Plasmid	BSI	1540	51.43	ecoli	-	NA	NA	29	21	NA	NA	Col(MG828)_1	NA	-	-	MOB_unknown,MOBP	mobilizable	PTU-E9	VI	1	NA	NA	NA	NA	NA	NA	NA	NA	PRJNA604975	NA
OX-BSI-245_2	5955c9f3-c3c9-413f-ba79-7c6a60e1fef3_contig	5955c9f3-c3c9-413f-ba79-7c6a60e1fef3_contig_2	Plasmid	BSI	2700	50.37	ecoli	-	NA	NA	65	10	qnrB19	NA	Col440I_1	NA	-	-	MOBP	mobilizable	PTU-E76	III	0.75	NA	NA	NA	NA	NA	NA	NA	NA	PRJNA604975	NA
OX-BSI-245_3	5955c9f3-c3c9-413f-ba79-7c6a60e1fef3_contig	5955c9f3-c3c9-413f-ba79-7c6a60e1fef3_contig_3	Plasmid	BSI	3342	46.14	ecoli	-	NA	NA	NA	NA	NA	NA	NA	NA	MOBV	-	-	mobilizable	-	-	1	NA	NA	NA	NA	NA	NA	NA	NA	PRJNA604975	NA
OX-BSI-246_1	59a9531e-4768-4507-ae98-8d1284a28ca9	59a9531e-4768-4507-ae98-8d1284a28ca9_chromo	Chromosome	BSI	5515427	57.57	kpneumoniae	2263	NA	NA	NA	NA	blaLEN-17,fosA,fosA7,oqxA,oqxB9	NA	NA	acn-BAC0003,acrA-BAC0005,acrB-BAC0006,acrC-BAC0007,acrD-BAC0563,acrE/envC-BAC0009,acrF/envD-BAC0010,adeE-BAC0013,arsB-BAC0578,arsC-BAC0582,arsC-BAC0583,arsR-BAC0589,baeS-BAC0040,bepG-BAC0046,bfrA-BAC0048,bhsA/ycfR/comC-BAC0049,chrA-BAC0026,chrB-BAC0027,comR/ycfQ-BAC0076,copA-BAC0725,corA-BAC0086,corB-BAC0643,corD-BAC0644,corR-BAC0089,cpxA-BAC0532,cueR/ybbI-BAC0105,cusA/ybdE-BAC0107,cusB-BAC0108,c…	NA	NA	NA	NA	NA	NA	NA	NA	NA	NA	2009-09-22	healthcare associated 0-30d	K84041	M	95	PRJNA604975	NA
OX-BSI-247_1	5a18aad0-9416-44de-8bbb-99210ef5e40d	5a18aad0-9416-44de-8bbb-99210ef5e40d_chromo	Chromosome	BSI	5141629	50.48	ecoli	73	NA	NA	NA	NA	blaEC-5	IS1203,IS200C,IS30,IS629,IS630,IS682,ISEc13,ISEc16,ISEc20,ISEc39,ISEc41,ISEc42,ISEc45	NA	acn-BAC0003,acrA-BAC0005,acrB-BAC0006,acrD/yffA-BAC0008,acrE/envC-BAC0009,acrF/envD-BAC0010,actP/yjcG-BAC0564,adeE-BAC0013,arsC-BAC0582,arsC-BAC0583,asr-BAC0038,baeS-BAC0040,bfrA-BAC0048,bhsA/ycfR/comC-BAC0049,comR/ycfQ-BAC0076,copA-BAC0725,corA-BAC0086,corB-BAC0643,corD-BAC0644,cpxA-BAC0532,cueO-BAC0103,cueR/ybbI-BAC0105,cusA/ybdE-BAC0107,cusB-BAC0108,cusC/ylcB-BAC0109,cusF/cusX-BAC0110,cusR/ylc…	NA	NA	NA	NA	NA	NA	NA	NA	NA	NA	2009-03-19	nosocomial	K83031	M	76	PRJNA604975	SAMN18257435
OX-BSI-247_2	5a18aad0-9416-44de-8bbb-99210ef5e40d	5a18aad0-9416-44de-8bbb-99210ef5e40d_2	Plasmid	BSI	148992	51.94	ecoli	73	NA	NA	15	38	aadA1,qacEdelta1,sul1	IS1326,IS1353,IS1R,IS2,ISEc10,ISEc22,ISKpn26	Col156_1,IncFIB(AP001918)_1,IncFIC(FII)_1	fecD-BAC0163,fecE-BAC0164,merA-BAC0652,merC-BAC0664,merD-BAC0666,merE-BAC0670,merP-BAC0678,merR-BAC0232,merT-BAC0693,qacEdelta1-BAC0323	MOBF,MOBP	MPF_F	MOBF	conjugative	PTU-FE	III	0.6905	NA	NA	NA	2009-03-19	nosocomial	K83031	M	76	PRJNA604975	SAMN18257435
OX-BSI-248_2	5a1c5982-1ba5-4c5a-82db-d36bf8750577	5a1c5982-1ba5-4c5a-82db-d36bf8750577_2	Plasmid	BSI	7017	49.18	ecoli	744	NA	NA	NA	NA	NA	NA	Col440II_1,ColRNAI_1	NA	MOBP	-	MOB_unknown	mobilizable	PTU-E3	V	0.9242	NA	NA	NA	NA	NA	NA	NA	NA	PRJNA604975	NA
OX-BSI-248_3	5a1c5982-1ba5-4c5a-82db-d36bf8750577	5a1c5982-1ba5-4c5a-82db-d36bf8750577_3	Plasmid	BSI	2173	45.7	ecoli	744	NA	NA	NA	NA	NA	NA	NA	NA	-	-	MOBP	mobilizable	-	-	1	NA	NA	NA	NA	NA	NA	NA	NA	PRJNA604975	NA
OX-BSI-248_1	5a1c5982-1ba5-4c5a-82db-d36bf8750577	5a1c5982-1ba5-4c5a-82db-d36bf8750577_chromo	Chromosome	BSI	4644664	50.77	ecoli	744	NA	NA	NA	NA	aadA5,aph(3'')-Ib,aph(6)-Id,blaTEM-1,catA1,dfrA17,mph(A),qacEdelta1,sul1,sul2,tet(B)	IS100kyp,IS150,IS1B,IS1X4,IS609,IS6100,IS903B,ISEc23,ISEc26,ISEc5,ISEc8,ISVsa5	NA	acn-BAC0003,acrA-BAC0005,acrB-BAC0006,acrD/yffA-BAC0008,acrE/envC-BAC0009,acrF/envD-BAC0010,actP/yjcG-BAC0564,arsB-BAC0576,arsC-BAC0583,arsC-BAC0584,arsR-BAC0594,asr-BAC0038,baeS-BAC0040,bfrA-BAC0048,bhsA/ycfR/comC-BAC0049,blt-BAC0050,comR/ycfQ-BAC0076,copA-BAC0725,copS-BAC0752,corA-BAC0086,corB-BAC0643,corD-BAC0644,cpxA-BAC0532,cueO-BAC0103,cueR/ybbI-BAC0105,cusA/ybdE-BAC0107,cusB-BAC0108,cusC/y…	NA	NA	NA	NA	NA	NA	NA	NA	NA	NA	NA	NA	NA	NA	NA	PRJNA604975	NA
OX-BSI-249_1	5a237f61-7e10-41f2-91da-279fbb0d8b90	5a237f61-7e10-41f2-91da-279fbb0d8b90_chromo	Chromosome	BSI	5045806	50.55	ecoli	23	NA	NA	NA	NA	aph(3'')-Ib,aph(6)-Id,sul2,tet(B)	IS1414,IS1A,IS1F,IS1H,IS3,IS30,IS4,IS629,IS911,ISEc8	NA	acn-BAC0003,acrA-BAC0005,acrB-BAC0006,acrD/yffA-BAC0008,acrE/envC-BAC0009,acrF/envD-BAC0010,actP/yjcG-BAC0564,arsB-BAC0576,arsC-BAC0584,arsR-BAC0594,asr-BAC0038,baeS-BAC0040,bfrA-BAC0048,bhsA/ycfR/comC-BAC0049,blt-BAC0050,comR/ycfQ-BAC0076,copA-BAC0725,copS-BAC0752,corA-BAC0086,corB-BAC0643,corD-BAC0644,cpxA-BAC0532,cueO-BAC0103,cueR/ybbI-BAC0105,cusA/ybdE-BAC0107,cusB-BAC0108,cusC/ylcB-BAC0109,c…	NA	NA	NA	NA	NA	NA	NA	NA	NA	NA	2018-01-26	nosocomial	K84038	F	75	PRJNA604975	SAMN18257434
OX-BSI-249_2	5a237f61-7e10-41f2-91da-279fbb0d8b90	5a237f61-7e10-41f2-91da-279fbb0d8b90_2	Plasmid	BSI	120707	49.94	ecoli	23	NA	NA	2	100	aadA2,blaTEM-1,dfrA12,qacEdelta1,sul1	IS4321R,IS6100,IS629,ISEc17,ISEc8,Tn3	IncFIB(AP001918)_1,IncFIC(FII)_1	qacEdelta1-BAC0323,sitA-BAC0349,sitB-BAC0350,sitC-BAC0351,sitD-BAC0352,smdB-BAC0354,tupC-BAC0607	MOBF,MOBP	MPF_F	MOBF	conjugative	PTU-?	III	0.7083	NA	NA	NA	2018-01-26	nosocomial	K84038	F	75	PRJNA604975	SAMN18257434
OX-BSI-250_1	5aa15531-39e6-48d0-8f6c-e8c962c54d64	5aa15531-39e6-48d0-8f6c-e8c962c54d64_chromo	Chromosome	BSI	5359638	50.45	ecoli	1057	NA	NA	NA	NA	blaEC-5	IS100kyp,IS1351,IS1397,IS30,IS609,IS621,IS682,ISEc10,ISEc13,ISEc16,ISEc21,ISEc38,ISEc42,ISEc48,ISEc8,ISEcl1,ISErsp1	NA	acn-BAC0003,acrA-BAC0005,acrD/yffA-BAC0008,acrE/envC-BAC0009,acrF/envD-BAC0010,actP/yjcG-BAC0564,arsC-BAC0582,arsC-BAC0583,asr-BAC0038,baeS-BAC0040,bfrA-BAC0048,bhsA/ycfR/comC-BAC0049,comR/ycfQ-BAC0076,copA-BAC0725,copS-BAC0752,corA-BAC0086,corB-BAC0643,corD-BAC0644,cpxA-BAC0532,cueO-BAC0103,cueR/ybbI-BAC0105,cusA/ybdE-BAC0107,cusB-BAC0108,cusC/ylcB-BAC0109,cusF/cusX-BAC0110,cusR/ylcA-BAC0111,cus…	NA	NA	NA	NA	NA	NA	NA	NA	NA	NA	2018-01-04	community	K84019	F	20	PRJNA604975	SAMN18257429
OX-BSI-251_1	5b1e6d3f-be30-4896-8717-77f9bd8cbf26	5b1e6d3f-be30-4896-8717-77f9bd8cbf26_chromo	Chromosome	BSI	5208446	50.56	ecoli	12	NA	NA	NA	NA	blaTEM-1	IS100kyp,IS10L,IS1F,IS2,IS200C,IS621,IS682,IS911,ISEc10,ISEc12,ISEc13,ISEc16,ISEc20,ISEc40,ISEc41,ISEc42,ISEc49,ISSd1,ISSen4,Tn3	NA	acn-BAC0003,acrA-BAC0005,acrD/yffA-BAC0008,acrE/envC-BAC0009,acrF/envD-BAC0010,actP/yjcG-BAC0564,arsC-BAC0582,arsC-BAC0583,asr-BAC0038,baeS-BAC0040,bfrA-BAC0048,bhsA/ycfR/comC-BAC0049,comR/ycfQ-BAC0076,copA-BAC0725,corA-BAC0086,corB-BAC0643,corD-BAC0644,cpxA-BAC0532,cueO-BAC0103,cueR/ybbI-BAC0105,cusA/ybdE-BAC0107,cusB-BAC0108,cusC/ylcB-BAC0109,cusF/cusX-BAC0110,cusR/ylcA-BAC0111,cusS-BAC0112,cut…	NA	NA	NA	NA	NA	NA	NA	NA	NA	NA	2018-04-04	community	K84027	M	73	PRJNA604975	SAMN18257422
OX-BSI-252_2	5b37ace7-8139-45cb-ba9a-2bb6af05baca	5b37ace7-8139-45cb-ba9a-2bb6af05baca_2	Plasmid	BSI	187605	51.13	kpneumoniae	273	NA	NA	NA	NA	aac(3)-IId,aadA5,aph(3'')-Ib,aph(6)-Id,dfrA17,mph(A),qacEdelta1,sul1,sul2	IS1A,IS1B,IS1X4,IS5075,IS6100,ISEc33,ISEc36,ISEc8,ISKox1,ISKpn2,ISKpn24,ISSen3,ISVsa3	IncFIB(K)_1_Kpn3,IncHI1B_1_pNDM-MAR	adeL-BAC0508,qacEdelta1-BAC0323	-	-	-	non-mobilizable	PTU-E35	I	1	NA	NA	NA	2018-03-01	community	L84031	F	66	PRJNA604975	NA
OX-BSI-252_3	5b37ace7-8139-45cb-ba9a-2bb6af05baca	5b37ace7-8139-45cb-ba9a-2bb6af05baca_3	Plasmid	BSI	65304	51.17	kpneumoniae	273	NA	NA	NA	NA	blaTEM-1,dfrA14,qnrS1,tet(D)	IS2,IS6100,ISEcl1,ISKpn19	IncFIA(HI1)_1_HI1,IncR_1	norA-BAC0282	-	-	MOBF	mobilizable	-	-	1	NA	NA	NA	2018-03-01	community	L84031	F	66	PRJNA604975	NA
OX-BSI-252_4	5b37ace7-8139-45cb-ba9a-2bb6af05baca	5b37ace7-8139-45cb-ba9a-2bb6af05baca_4	Plasmid	BSI	4167	41.49	kpneumoniae	273	NA	NA	188	3	NA	NA	Col440I_1	NA	-	-	-	non-mobilizable	-	-	1	NA	NA	NA	2018-03-01	community	L84031	F	66	PRJNA604975	NA
OX-BSI-252_1	5b37ace7-8139-45cb-ba9a-2bb6af05baca	5b37ace7-8139-45cb-ba9a-2bb6af05baca_chromo	Chromosome	BSI	5309734	57.47	kpneumoniae	273	NA	NA	NA	NA	blaSHV-11,fosA,oqxA,oqxB	NA	NA	acn-BAC0003,acrA-BAC0005,acrB-BAC0006,acrC-BAC0007,acrD-BAC0563,acrE/envC-BAC0009,acrF/envD-BAC0010,actP/yjcG-BAC0564,adeE-BAC0013,arsB-BAC0578,arsC-BAC0582,arsC-BAC0583,arsR-BAC0589,baeR-BAC0596,baeS-BAC0040,bepG-BAC0046,bfrA-BAC0048,bhsA/ycfR/comC-BAC0049,cepA-BAC0061,comR/ycfQ-BAC0076,copA-BAC0725,corA-BAC0086,corB-BAC0643,corD-BAC0644,cpxA-BAC0532,cueR/ybbI-BAC0105,cusA/ybdE-BAC0107,cusB-BAC0…	NA	NA	NA	NA	NA	NA	NA	NA	NA	NA	2018-03-01	community	L84031	F	66	PRJNA604975	NA
OX-BSI-253_2	5b70b4e0-9406-4d27-9cc0-9479ba272ec6	5b70b4e0-9406-4d27-9cc0-9479ba272ec6_2	Plasmid	BSI	114230	51.03	ecoli	95	NA	NA	1	123	NA	IS100kyp,IS21,IS26,ISEc10,ISEc53	Col156_1,IncFIB(AP001918)_1,IncFII(29)_1_pUTI89	NA	MOBF,MOBP	MPF_F	MOBF	conjugative	PTU-FE	III	1	NA	NA	NA	2018-02-09	healthcare associated 0-30d	K84028	M	80	PRJNA604975	SAMN18257419
OX-BSI-253_3	5b70b4e0-9406-4d27-9cc0-9479ba272ec6	5b70b4e0-9406-4d27-9cc0-9479ba272ec6_3	Plasmid	BSI	86815	52.6	ecoli	95	NA	NA	7	58	aph(3'')-Ib,aph(6)-Id,blaTEM-30,sul2	IS91,Tn3	IncB/O/K/Z_2	NA	MOBP	MPF_I	MOBP	conjugative	PTU-B/O/K/Z	III	0.9091	NA	NA	NA	2018-02-09	healthcare associated 0-30d	K84028	M	80	PRJNA604975	SAMN18257419
OX-BSI-253_1	5b70b4e0-9406-4d27-9cc0-9479ba272ec6	5b70b4e0-9406-4d27-9cc0-9479ba272ec6_chromo	Chromosome	BSI	5011788	50.53	ecoli	95	NA	NA	NA	NA	NA	IS100kyp,IS1203,IS1397,IS200C,IS21,IS621,ISEc20,ISEc30,ISEc38,ISEc40,ISEc45,ISEc48,ISEc8	NA	acn-BAC0003,acrA-BAC0005,acrD/yffA-BAC0008,acrE/envC-BAC0009,acrF/envD-BAC0010,actP/yjcG-BAC0564,arsC-BAC0582,arsC-BAC0583,asr-BAC0038,baeS-BAC0040,bfrA-BAC0048,bhsA/ycfR/comC-BAC0049,comR/ycfQ-BAC0076,copA-BAC0725,corA-BAC0086,corB-BAC0643,corD-BAC0644,cpxA-BAC0532,cueO-BAC0103,cueR/ybbI-BAC0105,cusA/ybdE-BAC0107,cusB-BAC0108,cusC/ylcB-BAC0109,cusF/cusX-BAC0110,cusR/ylcA-BAC0111,cusS-BAC0112,cut…	NA	NA	NA	NA	NA	NA	NA	NA	NA	NA	2018-02-09	healthcare associated 0-30d	K84028	M	80	PRJNA604975	SAMN18257419
OX-BSI-254_7	5c08a502-1572-43d4-a3ae-69d54ff242fc	5c08a502-1572-43d4-a3ae-69d54ff242fc_7	Plasmid	BSI	4072	49.8	ecoli	-	227	2	9	51	NA	NA	NA	NA	MOBQ	-	MOBQ,MOBQ	mobilizable	PTU-E10	III	1	NA	NA	NA	2018-09-13	nosocomial	K84011	F	90	PRJNA604975	SAMN18257414
OX-BSI-254_8	5c08a502-1572-43d4-a3ae-69d54ff242fc	5c08a502-1572-43d4-a3ae-69d54ff242fc_8	Plasmid	BSI	2101	47.17	ecoli	-	NA	NA	22	29	NA	NA	Col(BS512)_1	NA	-	-	-	non-mobilizable	PTU-E47	III	1	NA	NA	NA	2018-09-13	nosocomial	K84011	F	90	PRJNA604975	SAMN18257414
OX-BSI-254_3	5c08a502-1572-43d4-a3ae-69d54ff242fc	5c08a502-1572-43d4-a3ae-69d54ff242fc_3	Plasmid	BSI	97597	52.25	ecoli	-	NA	NA	7	58	aph(3'')-Ib,aph(6)-Id,tet(B)	IS10L,IS186B,ISSso4	IncB/O/K/Z_2	blt-BAC0050	MOBP	MPF_I	MOBP	conjugative	PTU-B/O/K/Z	III	0.9545	NA	NA	NA	2018-09-13	nosocomial	K84011	F	90	PRJNA604975	SAMN18257414
OX-BSI-254_9	5c08a502-1572-43d4-a3ae-69d54ff242fc	5c08a502-1572-43d4-a3ae-69d54ff242fc_9	Plasmid	BSI	1552	51.93	ecoli	-	22	5	6	62	NA	NA	Col(MG828)_1	NA	-	-	MOB_unknown	mobilizable	PTU-E9	VI	1	NA	NA	NA	2018-09-13	nosocomial	K84011	F	90	PRJNA604975	SAMN18257414
OX-BSI-254_1	5c08a502-1572-43d4-a3ae-69d54ff242fc	5c08a502-1572-43d4-a3ae-69d54ff242fc_chromo	Chromosome	BSI	5174320	50.69	ecoli	-	NA	NA	NA	NA	NA	IS10L,IS1203,IS1F,IS1R,IS30,IS911,ISEc10,ISEc17,ISEc22,ISEc38,ISEc46,ISEc8	NA	acn-BAC0003,acrA-BAC0005,acrB-BAC0006,acrD/yffA-BAC0008,acrE/envC-BAC0009,acrF/envD-BAC0010,actP/yjcG-BAC0564,arsA-BAC0571,arsB-BAC0576,arsC-BAC0582,arsC-BAC0583,arsD-BAC0587,arsP-BAC0036,arsR-BAC0594,asr-BAC0038,baeS-BAC0040,bfrA-BAC0048,bhsA/ycfR/comC-BAC0049,comR/ycfQ-BAC0076,copA-BAC0725,copS-BAC0752,corA-BAC0086,corB-BAC0643,corD-BAC0644,corR-BAC0089,cpxA-BAC0532,cueO-BAC0103,cueR/ybbI-BAC01…	NA	NA	NA	NA	NA	NA	NA	NA	NA	NA	2018-09-13	nosocomial	K84011	F	90	PRJNA604975	SAMN18257414
OX-BSI-254_5	5c08a502-1572-43d4-a3ae-69d54ff242fc	5c08a502-1572-43d4-a3ae-69d54ff242fc_5	Plasmid	BSI	5631	47.38	ecoli	-	NA	NA	11	43	NA	NA	ColRNAI_1	NA	MOBP	-	MOBP	mobilizable	PTU-E22	I	1	NA	NA	NA	2018-09-13	nosocomial	K84011	F	90	PRJNA604975	SAMN18257414
OX-BSI-254_2	5c08a502-1572-43d4-a3ae-69d54ff242fc	5c08a502-1572-43d4-a3ae-69d54ff242fc_2	Plasmid	BSI	138864	51.6	ecoli	-	NA	NA	30	21	aadA5,dfrA17,qacEdelta1,sul1,tet(B)	IS100kyp,IS26,ISCro1,ISSm1	Col156_1,IncFIA_1,IncFIB(AP001918)_1,IncFIC(FII)_1	qacEdelta1-BAC0323	MOBF,MOBP	MPF_F	MOBF	conjugative	PTU-?	I	0.6905	NA	NA	NA	2018-09-13	nosocomial	K84011	F	90	PRJNA604975	SAMN18257414
OX-BSI-254_4	5c08a502-1572-43d4-a3ae-69d54ff242fc	5c08a502-1572-43d4-a3ae-69d54ff242fc_4	Plasmid	BSI	7940	41.66	ecoli	-	NA	NA	41	14	NA	NA	ColRNAI_1	NA	MOBP,MOBP	-	MOBP	mobilizable	-	-	1	NA	NA	NA	2018-09-13	nosocomial	K84011	F	90	PRJNA604975	SAMN18257414
OX-BSI-254_6	5c08a502-1572-43d4-a3ae-69d54ff242fc	5c08a502-1572-43d4-a3ae-69d54ff242fc_6	Plasmid	BSI	4237	40.71	ecoli	-	NA	NA	79	8	NA	NA	NA	NA	-	MPF_T	-	non-mobilizable	-	-	1	NA	NA	NA	2018-09-13	nosocomial	K84011	F	90	PRJNA604975	SAMN18257414
OX-BSI-255_1	5c794493-c0c5-420c-9ad6-c01419f95255	5c794493-c0c5-420c-9ad6-c01419f95255_chromo	Chromosome	BSI	5124012	50.44	ecoli	127	NA	NA	NA	NA	NA	IS682,ISEc13,ISEc16,ISEc20,ISEc38,ISEc40,ISEc42,ISEc8,ISSaen1	NA	acn-BAC0003,acrA-BAC0005,acrD/yffA-BAC0008,acrE/envC-BAC0009,acrF/envD-BAC0010,actP/yjcG-BAC0564,arsC-BAC0582,arsC-BAC0583,asr-BAC0038,baeS-BAC0040,bfrA-BAC0048,bhsA/ycfR/comC-BAC0049,comR/ycfQ-BAC0076,copA-BAC0725,copS-BAC0752,corB-BAC0643,corD-BAC0644,cpxA-BAC0532,cueO-BAC0103,cueR/ybbI-BAC0105,cusA/ybdE-BAC0107,cusB-BAC0108,cusC/ylcB-BAC0109,cusF/cusX-BAC0110,cusR/ylcA-BAC0111,cusS-BAC0112,cut…	NA	NA	NA	NA	NA	NA	NA	NA	NA	NA	2009-01-26	community	K84039	M	62	PRJNA604975	SAMN18257411
OX-BSI-255_2	5c794493-c0c5-420c-9ad6-c01419f95255	5c794493-c0c5-420c-9ad6-c01419f95255_2	Plasmid	BSI	148167	50.21	ecoli	127	NA	NA	15	38	blaTEM-1,tet(B)	IS10L,IS26,ISEc10,ISEc22,ISKpn26,ISVsa5,Tn3	Col156_1,IncFIB(AP001918)_1,IncFIC(FII)_1	blt-BAC0050,cpxR-BAC0533,fecD-BAC0163,fecE-BAC0164	MOBF,MOBP	MPF_F	MOBF	conjugative	PTU-FE	III	0.994	NA	NA	NA	2009-01-26	community	K84039	M	62	PRJNA604975	SAMN18257411
OX-BSI-255_3	5c794493-c0c5-420c-9ad6-c01419f95255	5c794493-c0c5-420c-9ad6-c01419f95255_3	Plasmid	BSI	36028	42.48	ecoli	127	NA	NA	23	26	NA	NA	NA	triA-BAC0396,triC-BAC0398	MOBP	MPF_T	-	conjugative	PTU-X1	III	1	NA	NA	NA	2009-01-26	community	K84039	M	62	PRJNA604975	SAMN18257411
OX-BSI-256_2	5c86edcd-9feb-40ae-8189-ae51f1228b6b	5c86edcd-9feb-40ae-8189-ae51f1228b6b_2	Plasmid	BSI	49584	48.72	ecoli	446	NA	NA	113	5	NA	NA	IncFIA(HI1)_1_HI1,IncFIB(pB171)_1_pB171	robA-BAC0334	MOBF	MPF_F	-	conjugative	-	-	1	NA	NA	NA	2018-10-03	healthcare associated 31-365d	K84010	M	76	PRJNA604975	SAMN18257410
OX-BSI-256_1	5c86edcd-9feb-40ae-8189-ae51f1228b6b	5c86edcd-9feb-40ae-8189-ae51f1228b6b_chromo	Chromosome	BSI	5084698	50.62	ecoli	446	NA	NA	NA	NA	NA	IS1414,IS1H,IS200C,IS3,IS629,ISEc17,ISEc26,ISEc31,ISEc38,ISSpu2,ISSso6	NA	acn-BAC0003,acrA-BAC0005,acrB-BAC0006,acrD/yffA-BAC0008,acrE/envC-BAC0009,acrF/envD-BAC0010,actP/yjcG-BAC0564,arsB-BAC0576,arsC-BAC0583,arsC-BAC0584,arsP-BAC0036,arsR-BAC0594,asr-BAC0038,baeS-BAC0040,bfrA-BAC0048,bhsA/ycfR/comC-BAC0049,comR/ycfQ-BAC0076,copA-BAC0725,corA-BAC0086,corB-BAC0643,corD-BAC0644,cpxA-BAC0532,cueO-BAC0103,cueR/ybbI-BAC0105,cusA/ybdE-BAC0107,cusB-BAC0108,cusC/ylcB-BAC0109,…	NA	NA	NA	NA	NA	NA	NA	NA	NA	NA	2018-10-03	healthcare associated 31-365d	K84010	M	76	PRJNA604975	SAMN18257410
[truncated: 4,258 more rows]
