# Supplementary material for: Enterobacterales plasmid sharing amongst human bloodstream infections, livestock, wastewater, and waterway niches in Oxfordshire, UK
Source: eLife journal article supplement (doi:10.7554/elife.85302), 2023-03-24
Supplement: supp [file elife-85302-supp-v1.zip › elife_poa_e85302_Supplementary_file_5.csv]

Core	Gene	Non-unique Gene name	Annotation
TRUE	group_462	NA	hypothetical protein
TRUE	finO	finO	Fertility inhibition protein
TRUE	traI~~~traI_2~~~traI_1	traI;;traI_2;traI_1	Multifunctional conjugation protein TraI;hypothetical protein
TRUE	group_225	NA	hypothetical protein
TRUE	xerC_1	xerC_1	Tyrosine recombinase XerC
TRUE	group_177	NA	hypothetical protein
TRUE	cvaA	cvaA;	Colicin V secretion protein CvaA;hypothetical protein
TRUE	group_133	NA	hypothetical protein
TRUE	group_131	NA	hypothetical protein
TRUE	yciC_1~~~yciC	yciC_1;yciC	Putative metal chaperone YciC
TRUE	group_124	NA	hypothetical protein
TRUE	ompT	ompT	Protease 7
TRUE	group_116	NA	hypothetical protein
TRUE	repB	repB	RepFIB replication protein A
TRUE	aroH	aroH	Phospho-2-dehydro-3-deoxyheptonate aldolase Trp-sensitive
TRUE	fes	fes	Enterochelin esterase
TRUE	group_65	NA	hypothetical protein
TRUE	group_56	NA	hypothetical protein
TRUE	group_55	NA	hypothetical protein
TRUE	group_47	NA	Multidrug efflux ATP-binding/permease protein
TRUE	apxIB	apxIB	Toxin RTX-I translocation ATP-binding protein
TRUE	pfeA	pfeA	Ferric enterobactin receptor
TRUE	group_479	NA	hypothetical protein
TRUE	group_447	NA	hypothetical protein
TRUE	group_377	NA	hypothetical protein
TRUE	group_353	NA	hypothetical protein
TRUE	group_178	NA	hypothetical protein
TRUE	group_112	NA	hypothetical protein
TRUE	elmGT	elmGT	Elloramycin glycosyltransferase ElmGT
TRUE	group_59	NA	IS481 family transposase ISKpn28;hypothetical protein
TRUE	group_379	NA	IS481 family transposase ISKpn28
TRUE	psiB~~~psiB_2	psiB;psiB_2	Protein PsiB
TRUE	group_253	NA	hypothetical protein
TRUE	group_244	NA	hypothetical protein
TRUE	traM	traM	Relaxosome protein TraM
TRUE	cvaC	cvaC	Colicin-V
TRUE	group_170	NA	hypothetical protein
TRUE	macB_1~~~macB	macB_1;macB	Macrolide export ATP-binding/permease protein MacB
TRUE	umuC	umuC	Protein UmuC
TRUE	group_57	NA	hypothetical protein
TRUE	tdeA	tdeA	Toxin and drug export protein A
TRUE	macA	macA	Macrolide export protein MacA
TRUE	ssb	ssb;	Plasmid-derived single-stranded DNA-binding protein;Single-stranded DNA-binding protein
TRUE	group_260	NA	hypothetical protein
TRUE	group_188	NA	hypothetical protein
TRUE	group_30	NA	IS1 family transposase IS1A
TRUE	group_202	NA	hypothetical protein;IS1 family transposase IS1R
TRUE	group_471	NA	hypothetical protein
TRUE	group_430	NA	hypothetical protein
TRUE	eno	eno	Enolase
TRUE	crcB	crcB	Putative fluoride ion transporter CrcB
TRUE	group_190	NA	ISNCY family transposase ISBcen27;hypothetical protein
TRUE	mntB_3	mntB_3	Manganese transport system ATP-binding protein MntB
TRUE	mntB_1	mntB_1	Manganese transport system membrane protein MntB
TRUE	iutA_2~~~iutA_1~~~iutA	iutA_2;iutA_1;iutA	Ferric aerobactin receptor
TRUE	mntB_2	mntB_2	Manganese transport system membrane protein MntB
TRUE	iucD	iucD	L-lysine N6-monooxygenase
FALSE	group_454	NA	hypothetical protein
FALSE	group_387	NA	Sugar transporter SemiSWEET
FALSE	group_283	NA	ISNCY family transposase ISBcen27;hypothetical protein
FALSE	traC~~~traC_1~~~traC_2	traC;traC_1;traC_2	Protein TraC
FALSE	group_262	NA	hypothetical protein
FALSE	group_252	NA	hypothetical protein
FALSE	group_251	NA	hypothetical protein
FALSE	group_249	NA	hypothetical protein
FALSE	group_247	NA	hypothetical protein
FALSE	traA	traA	Pilin
FALSE	traQ	traQ	Protein TraQ
FALSE	group_197	NA	hypothetical protein
FALSE	traD_2~~~traD~~~traD_1	traD_2;traD;traD_1	Coupling protein TraD
FALSE	group_147	NA	hypothetical protein
FALSE	group_110	NA	hypothetical protein
FALSE	ntdC	;ntdC	hypothetical protein;Glucose-6-phosphate 3-dehydrogenase
FALSE	group_103	NA	hypothetical protein
FALSE	ylpA	ylpA	Lipoprotein YlpA
FALSE	traV	traV	Protein TraV
FALSE	noc	noc;	Nucleoid occlusion protein;hypothetical protein
FALSE	group_235	NA	hypothetical protein
FALSE	traN	traN	Mating pair stabilization protein TraN
FALSE	group_230	NA	hypothetical protein
FALSE	group_224	NA	hypothetical protein
FALSE	group_216	NA	Ferredoxin--NADP reductase;hypothetical protein
FALSE	traR	traR	Protein TraR
FALSE	group_198	NA	hypothetical protein
FALSE	iucC	iucC	Aerobactin synthase
FALSE	group_123	NA	putative periplasmic iron-binding protein
FALSE	group_85	NA	hypothetical protein
FALSE	iucB_2~~~iucB_1~~~iucB	iucB_2;iucB_1;iucB	N(6)-hydroxylysine O-acetyltransferase
FALSE	iucA	iucA	N(2)-citryl-N(6)-acetyl-N(6)-hydroxylysine synthase
FALSE	group_2	NA	hypothetical protein
FALSE	group_477	NA	hypothetical protein
FALSE	group_399	NA	hypothetical protein
FALSE	group_234	NA	hypothetical protein
FALSE	group_228	NA	hypothetical protein
FALSE	group_182	NA	hypothetical protein
FALSE	group_154	NA	IS3 family transposase IS2
FALSE	group_67	NA	IS3 family transposase IS629
FALSE	group_445	NA	hypothetical protein
FALSE	sopB	sopB	Protein SopB
FALSE	group_165	NA	IS3 family transposase IS629
FALSE	group_135	NA	hypothetical protein
FALSE	group_90	NA	hypothetical protein
FALSE	group_121	NA	hypothetical protein
FALSE	group_442	NA	hypothetical protein
FALSE	group_417	NA	hypothetical protein
FALSE	group_183	NA	hypothetical protein
FALSE	group_174	NA	hypothetical protein
FALSE	group_34	NA	hypothetical protein
FALSE	group_368	NA	hypothetical protein
FALSE	aidA	aidA	Quorum-quenching protein AidA
FALSE	group_179	NA	hypothetical protein
FALSE	klcA	klcA;	Antirestriction protein KlcA;hypothetical protein
FALSE	group_259	NA	hypothetical protein
FALSE	group_71	NA	hypothetical protein;IS1 family transposase IS1S;IS1 family transposase IS1R
FALSE	group_199	traJ	Protein TraJ
FALSE	traY	traY	Relaxosome protein TraY
FALSE	group_401	NA	hypothetical protein
FALSE	group_66	NA	hypothetical protein
FALSE	group_263	NA	hypothetical protein
FALSE	group_241	NA	hypothetical protein
FALSE	group_240	NA	hypothetical protein
FALSE	group_164	NA	hypothetical protein
FALSE	group_431	flmC	Protein FlmC
FALSE	group_350	NA	hypothetical protein
FALSE	cia~~~cia_2~~~cia_1	cia;cia_2;cia_1	Colicin-Ia
FALSE	group_255	NA	hypothetical protein
FALSE	group_238	NA	hypothetical protein
FALSE	group_163	NA	hypothetical protein
FALSE	group_162	NA	hypothetical protein
FALSE	group_105	NA	hypothetical protein
FALSE	dinG	dinG;	3'-5' exonuclease DinG;hypothetical protein
FALSE	relE2	;relE2	hypothetical protein;Toxin RelE2
FALSE	group_455	NA	hypothetical protein
FALSE	group_435	NA	hypothetical protein
FALSE	group_272	NA	hypothetical protein
FALSE	group_120	NA	hypothetical protein
FALSE	group_113	NA	IS110 family transposase ISEc32
FALSE	group_344	NA	hypothetical protein
FALSE	group_211	NA	hypothetical protein
FALSE	fdtC	fdtC	dTDP-3-amino-36-dideoxy-alpha-D-galactopyranose 3-N-acetyltransferase
FALSE	group_27	NA	hypothetical protein
FALSE	group_16	NA	hypothetical protein
FALSE	group_258	NA	hypothetical protein
FALSE	group_277	NA	hypothetical protein
FALSE	yhcR	;yhcR	hypothetical protein;Endonuclease YhcR
FALSE	group_229	NA	hypothetical protein;Tn3 family transposase TnAs3;Tn3 family transposase TnAs1
FALSE	group_472	NA	hypothetical protein
FALSE	group_213	NA	hypothetical protein
FALSE	hin~~~bin3	hin;bin3	DNA-invertase hin;Putative transposon Tn552 DNA-invertase bin3
FALSE	group_144	NA	hypothetical protein
FALSE	group_75	NA	hypothetical protein
FALSE	traS	traS;	Protein TraS;hypothetical protein
FALSE	group_239	NA	hypothetical protein
FALSE	group_136	NA	hypothetical protein
FALSE	group_7	bla	Beta-lactamase TEM
FALSE	hha	hha	Hemolysin expression-modulating protein Hha
FALSE	group_169	NA	IS6 family transposase IS15DII;IS6 family transposase IS26
FALSE	group_29	NA	IS1 family transposase IS1A
FALSE	xerC_3~~~xerD~~~xerC_2	xerC_3;xerD;xerC_2	Tyrosine recombinase XerC;Tyrosine recombinase XerD
FALSE	merP	merP	Mercuric transport protein periplasmic component
FALSE	group_192	NA	putative signaling protein
FALSE	group_172	NA	hypothetical protein;ISL3 family transposase ISStma11
FALSE	merT	merT	Mercuric transport protein MerT
FALSE	group_84	NA	hypothetical protein
FALSE	merC	merC	Mercuric transport protein MerC
FALSE	group_43	NA	hypothetical protein
FALSE	merA	merA	Mercuric reductase
FALSE	group_414	NA	hypothetical protein
FALSE	group_413	NA	hypothetical protein
FALSE	group_91	NA	hypothetical protein
FALSE	dhfrI	dhfrI	Dihydrofolate reductase type 1
FALSE	group_289	NA	Tn3 family transposase ISEc63;Tn3 family transposase Tn2
FALSE	group_275	NA	hypothetical protein
FALSE	group_274	NA	IS66 family transposase ISEc22;IS66 family transposase ISEc8
FALSE	group_48	NA	hypothetical protein
FALSE	group_409	NA	hypothetical protein
FALSE	tetR	tetR	Tetracycline repressor protein class A from transposon 1721
FALSE	neo	neo	Aminoglycoside 3'-phosphotransferase
FALSE	group_148	NA	hypothetical protein
FALSE	group_87	tetA	Tetracycline resistance protein class C
FALSE	group_3	NA	IS6 family transposase IS26
FALSE	group_152	folP	Dihydropteroate synthase
FALSE	tnpR	tnpR	Transposon Tn3 resolvase
FALSE	group_50	NA	hypothetical protein
FALSE	repA	repA	Regulatory protein RepA
FALSE	group_184	NA	hypothetical protein;IS1 family transposase IS1R
FALSE	group_78	NA	hypothetical protein
FALSE	group_374	NA	IS3 family transposase ISEc17
FALSE	group_129	NA	Tn3 family transposase TnAs1
FALSE	group_109	NA	IS3 family transposase IS3;IS3 family transposase ISEc17
FALSE	aer	aer	Aerotaxis receptor
FALSE	group_4	NA	IS6 family transposase IS26
FALSE	group_140	NA	hypothetical protein
FALSE	group_302	NA	hypothetical protein
FALSE	group_98	NA	hypothetical protein
FALSE	group_5	NA	IS6 family transposase IS26
FALSE	group_270	NA	hypothetical protein;IS1 family transposase IS1A;IS1 family transposase IS1S
FALSE	group_233	NA	hypothetical protein
FALSE	group_157	NA	hypothetical protein
FALSE	tnpR_1~~~tnpR	;tnpR_1;tnpR	hypothetical protein;Transposon Tn3 resolvase
FALSE	group_10	NA	IS21 family transposase IS100kyp
FALSE	group_254	NA	hypothetical protein
FALSE	group_209	NA	hypothetical protein
FALSE	group_482	NA	hypothetical protein
FALSE	group_481	NA	hypothetical protein
FALSE	group_171	NA	IS21 family transposase ISEc12
FALSE	group_45	NA	IS21 family transposase ISPpu7
FALSE	group_28	NA	hypothetical protein
FALSE	group_161	NA	IS66 family transposase IS679;IS66 family transposase ISCro1
FALSE	insK	;insK	IS3 family transposase IS629;Putative transposase InsK for insertion sequence element IS150;IS3 family transposase IS1203
FALSE	neo_2	neo_2	Aminoglycoside 3'-phosphotransferase
FALSE	group_21	NA	hypothetical protein
FALSE	group_160	NA	IS66 family transposase IS679;IS66 family transposase ISCro1
FALSE	group_22	NA	hypothetical protein
FALSE	group_215	NA	IS3 family transposase IS3411;IS3 family transposase IS629
FALSE	group_118	NA	hypothetical protein
FALSE	group_24	NA	hypothetical protein
FALSE	group_14	NA	IS66 family transposase ISEc23
FALSE	group_11	NA	hypothetical protein
FALSE	group_9	NA	IS21 family transposase IS100kyp
FALSE	group_281	NA	IS6 family transposase IS26
FALSE	group_159	NA	hypothetical protein
FALSE	group_282	NA	IS110 family transposase IS4321L;IS110 family transposase IS5075
FALSE	group_266	NA	hypothetical protein;IS1 family transposase IS1X2
FALSE	traD_2	traD_2	Coupling protein TraD
FALSE	group_422	NA	hypothetical protein
FALSE	group_421	NA	hypothetical protein
FALSE	hdfR	hdfR	HTH-type transcriptional regulator HdfR
FALSE	group_335	NA	hypothetical protein
FALSE	group_326	NA	hypothetical protein
FALSE	group_295	NA	hypothetical protein
FALSE	group_264	NA	hypothetical protein;IS3 family transposase ISEc52
FALSE	ltrA~~~ltrA_1	;ltrA;ltrA_1	hypothetical protein;Group II intron-encoded protein LtrA
FALSE	group_185	NA	hypothetical protein
FALSE	group_151	NA	hypothetical protein
FALSE	bcr	bcr	Bicyclomycin resistance protein
FALSE	group_62	NA	hypothetical protein
FALSE	group_52	NA	hypothetical protein
FALSE	group_324	NA	hypothetical protein
FALSE	group_223	NA	IS3 family transposase ISEc52
FALSE	macB_2	macB_2	Macrolide export ATP-binding/permease protein MacB
FALSE	group_516	NA	hypothetical protein
FALSE	group_515	NA	IS91 family transposase ISSbo1
FALSE	group_514	NA	hypothetical protein
FALSE	group_513	NA	IS91 family transposase ISSbo1
FALSE	group_512	NA	IS91 family transposase ISSbo1
FALSE	group_511	NA	hypothetical protein
FALSE	group_506	NA	hypothetical protein
FALSE	group_505	NA	hypothetical protein
FALSE	group_468	NA	hypothetical protein
FALSE	psiB_1	psiB_1	Protein PsiB
FALSE	group_411	ssb	Plasmid-derived single-stranded DNA-binding protein
FALSE	group_381	NA	hypothetical protein
FALSE	group_342	NA	hypothetical protein
FALSE	group_315	NA	hypothetical protein
FALSE	xerD	xerD	Tyrosine recombinase XerD
FALSE	group_287	NA	hypothetical protein
FALSE	group_220	NA	hypothetical protein
FALSE	ltrA_2	ltrA_2	Group II intron-encoded protein LtrA
FALSE	group_80	NA	hypothetical protein
FALSE	group_79	NA	ISL3 family transposase ISEc53
