# Supplementary figures and images for: Enterobacterales plasmid sharing amongst human bloodstream infections, livestock, wastewater, and waterway niches in Oxfordshire, UK
Source: eLife journal article supplement (doi:10.7554/elife.85302), 2023-03-24

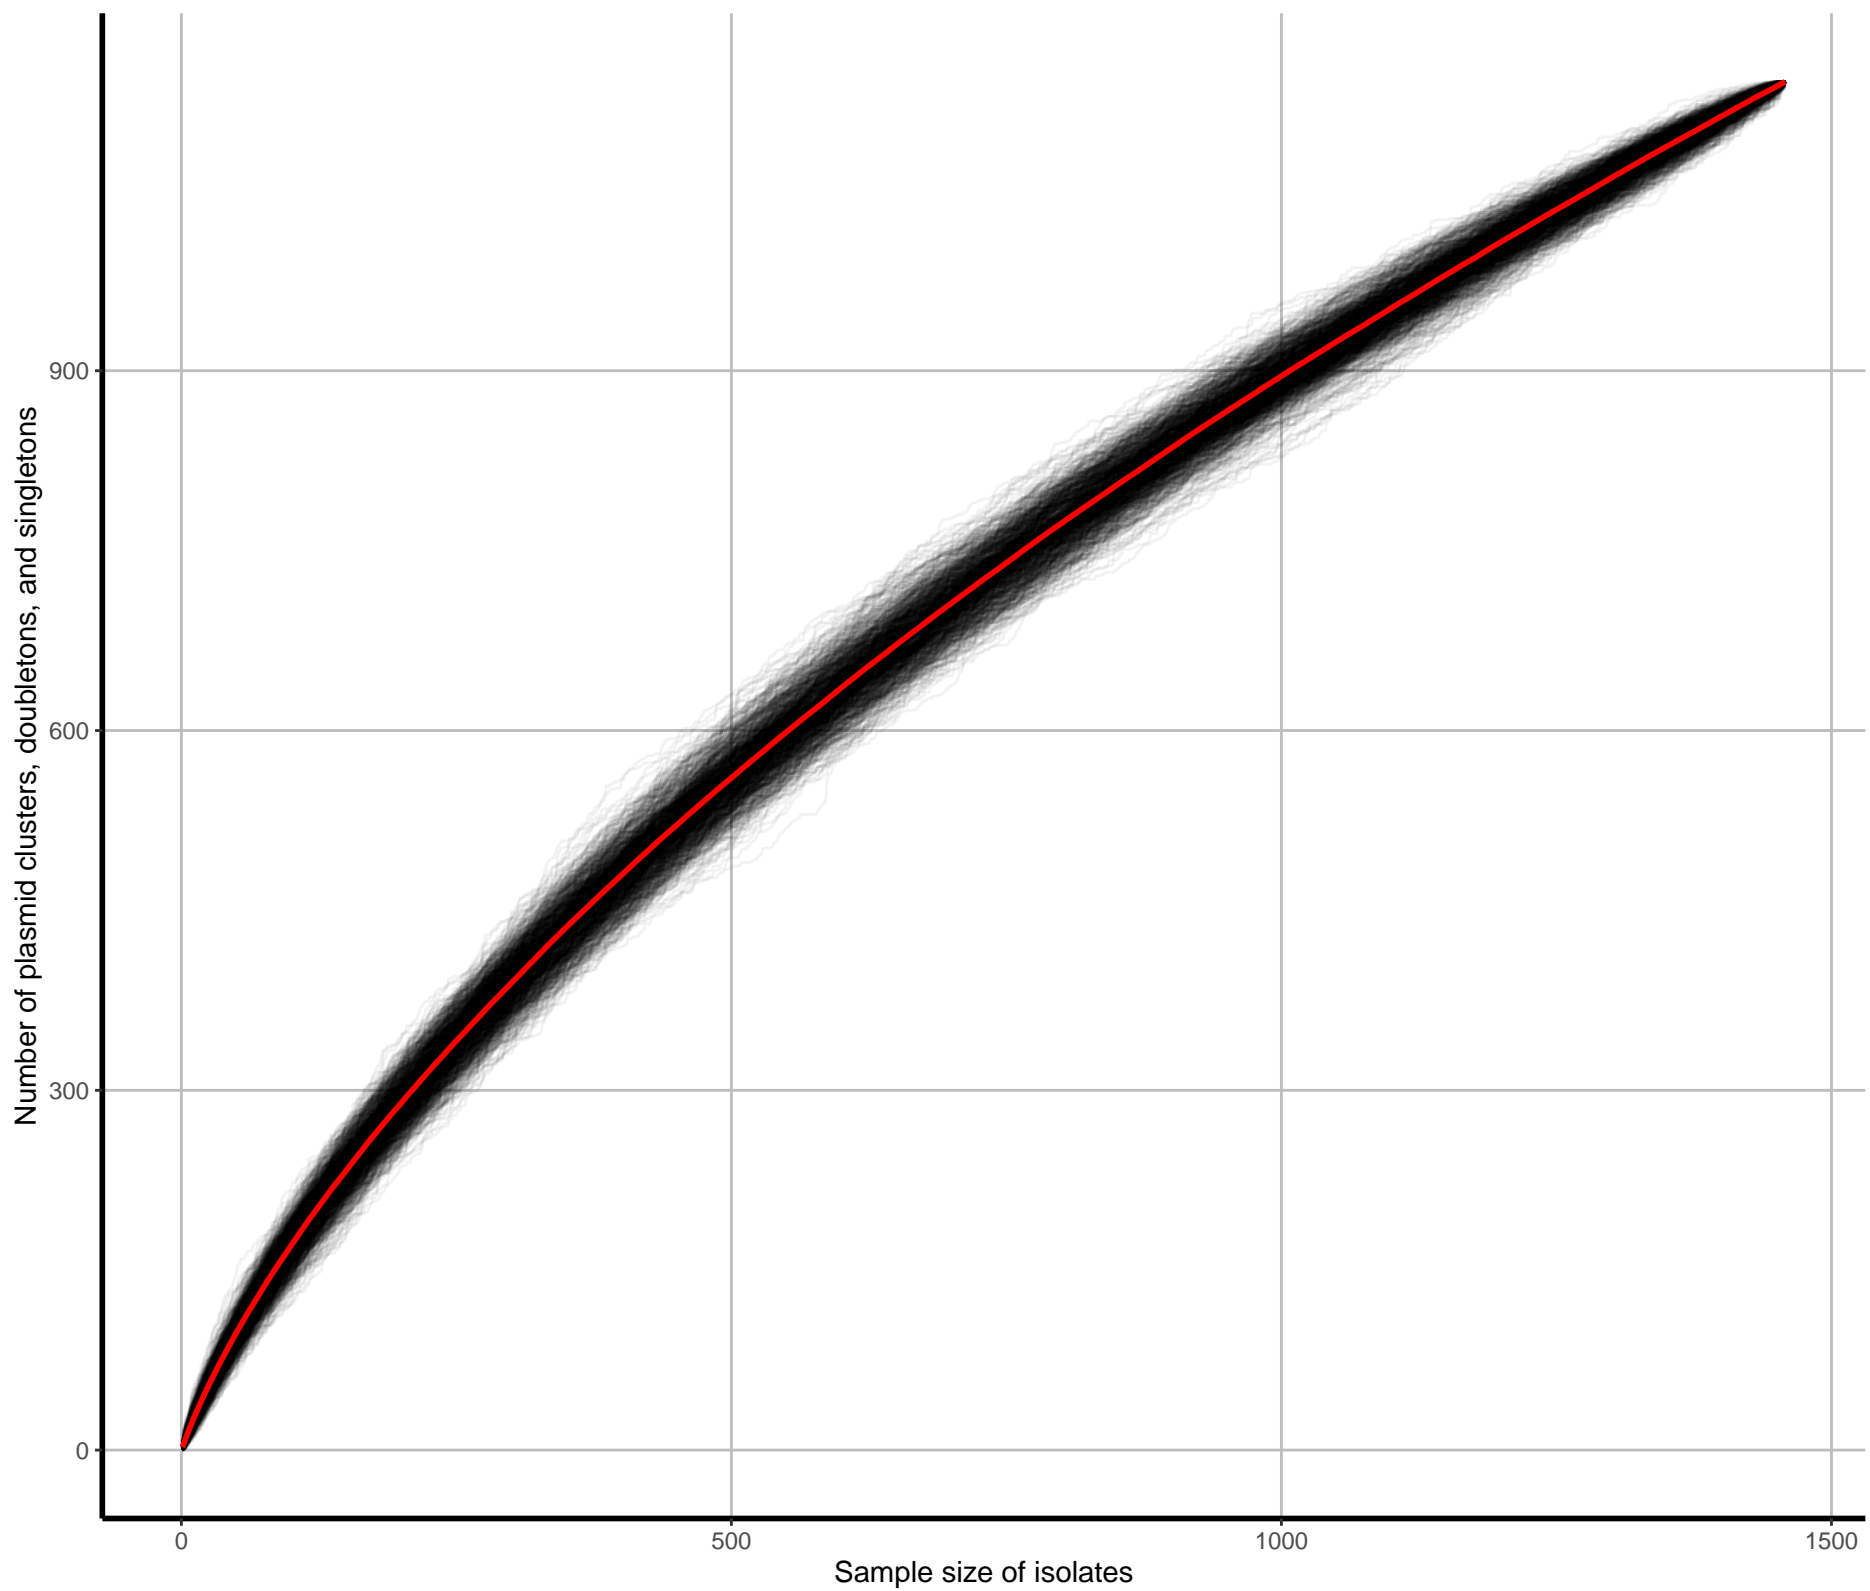

Supplement: supp [file elife-85302-supp-v1.zip]

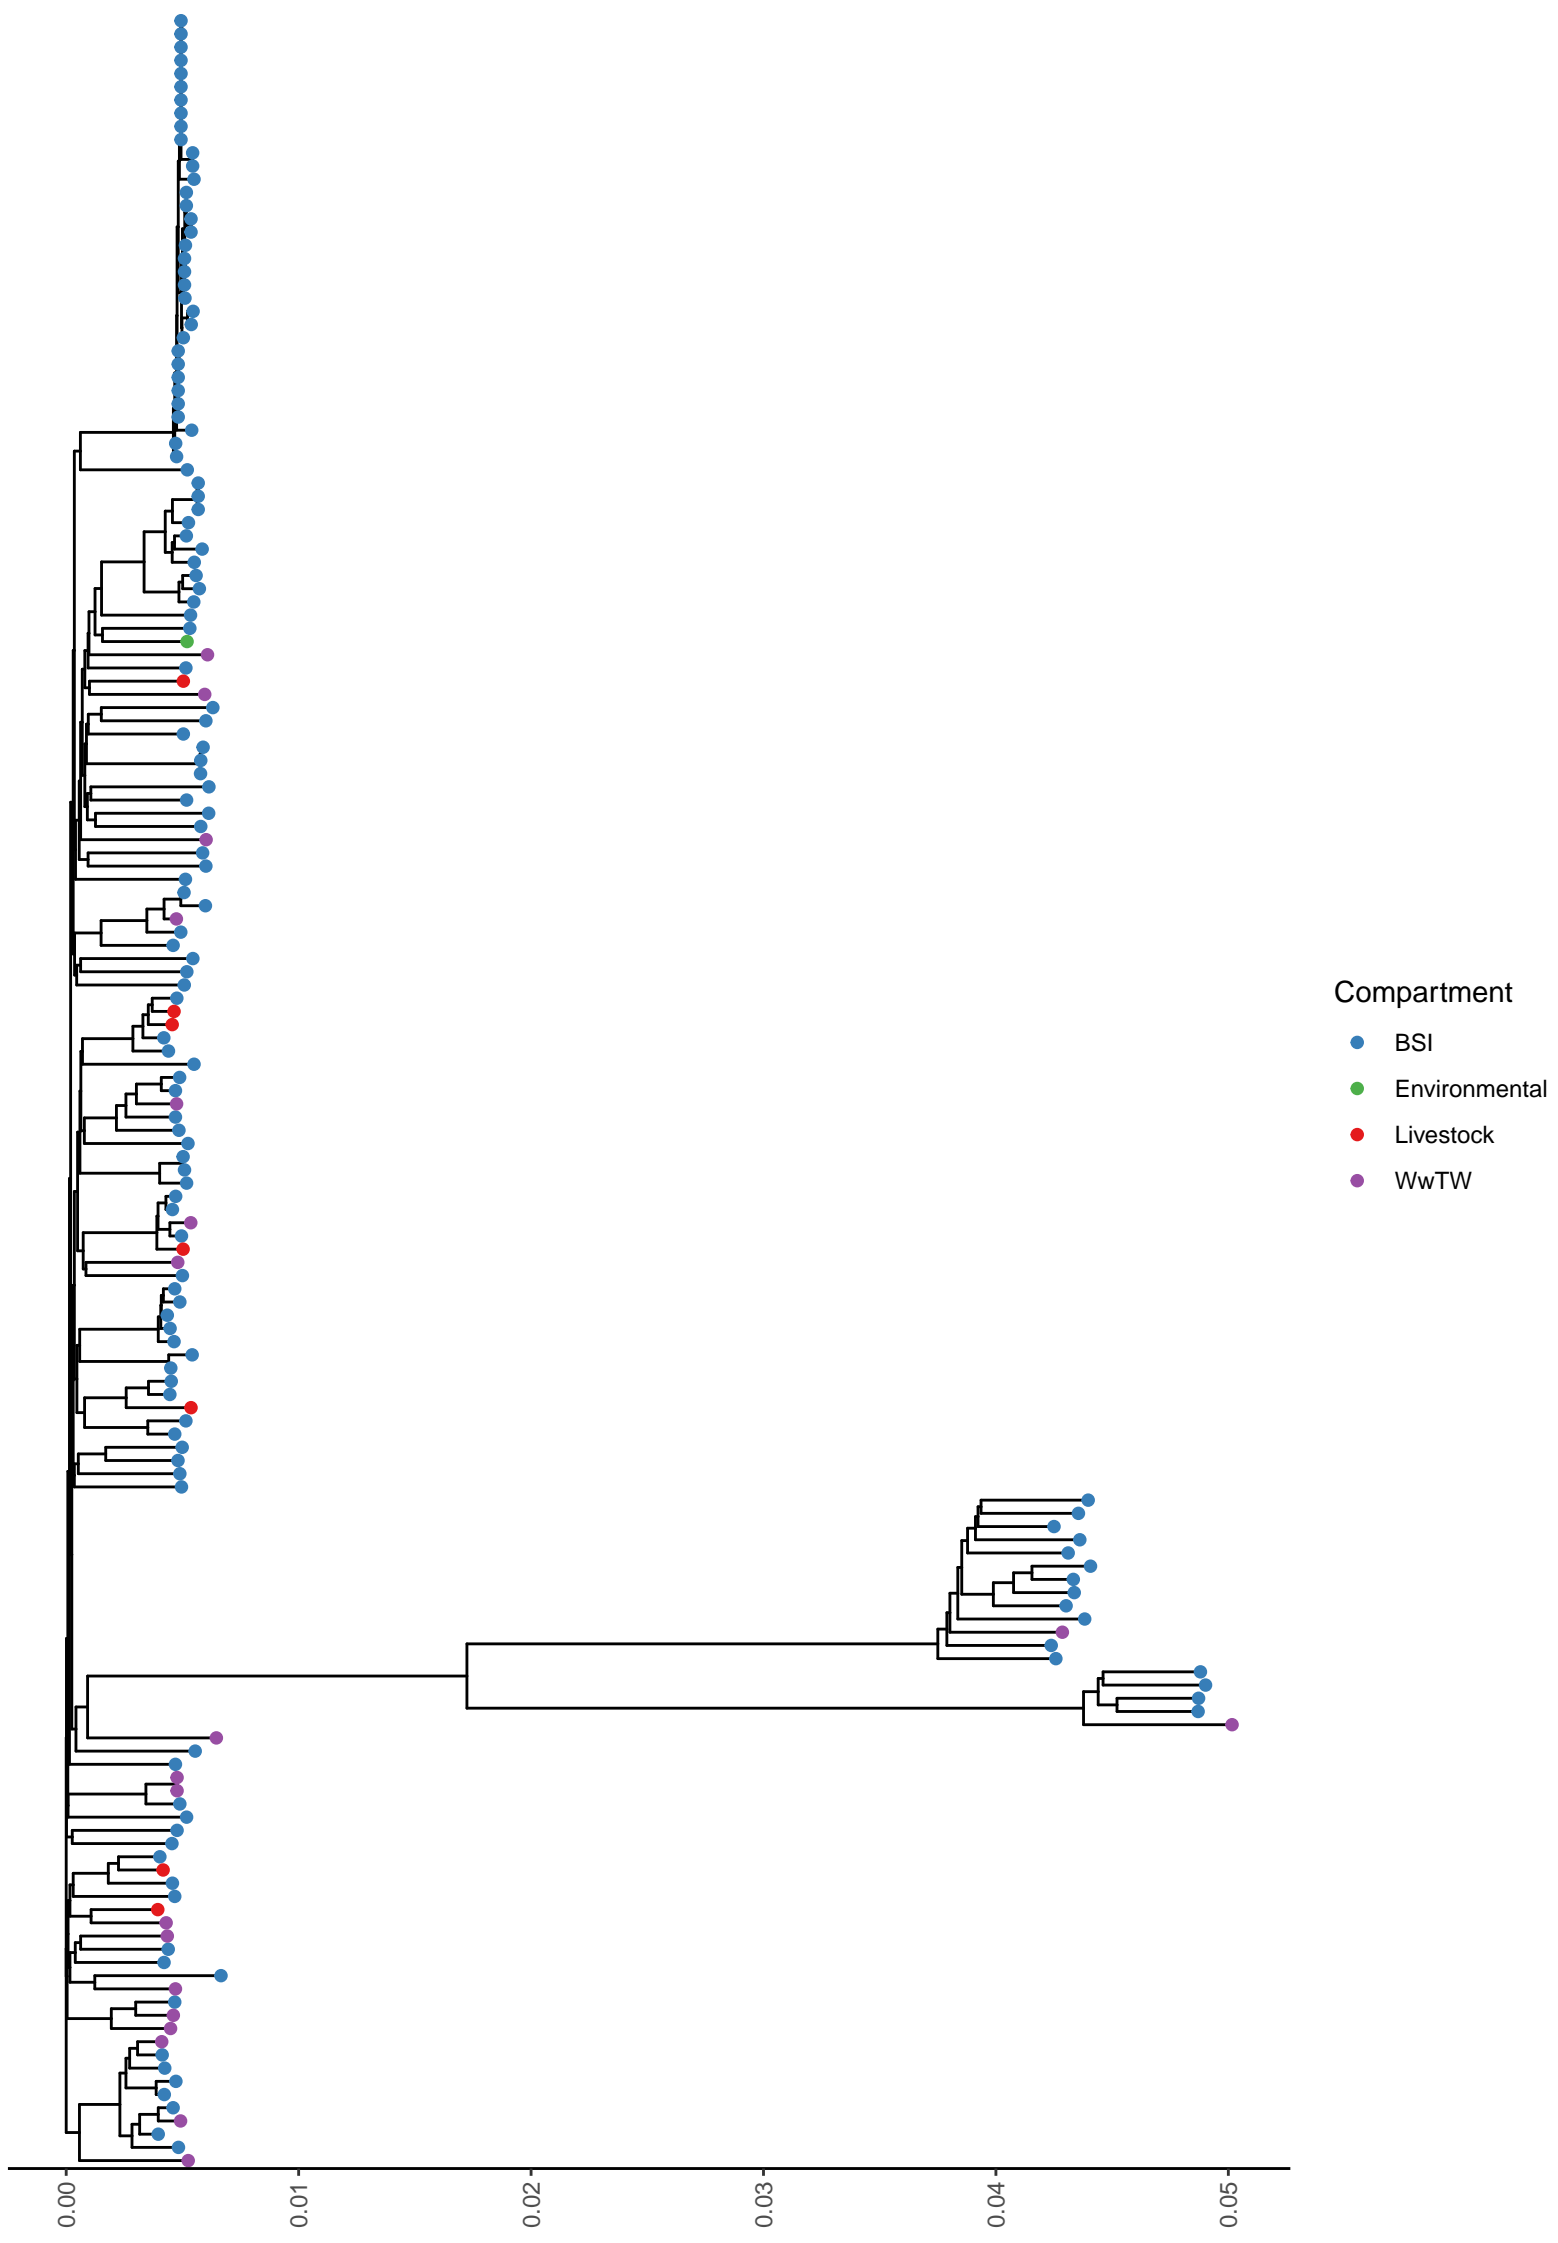

Supplement: supp [file elife-85302-supp-v1.zip]

Mean number of other AMR genes  
on plasmids in cluster

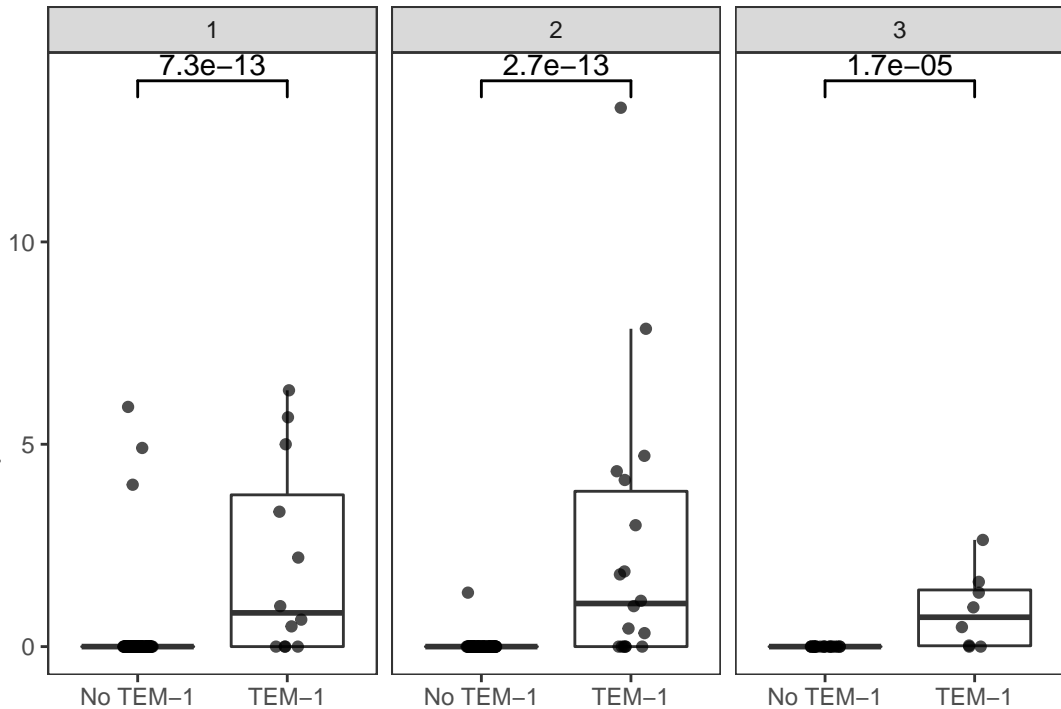

Supplement: supp [file elife-85302-supp-v1.zip]

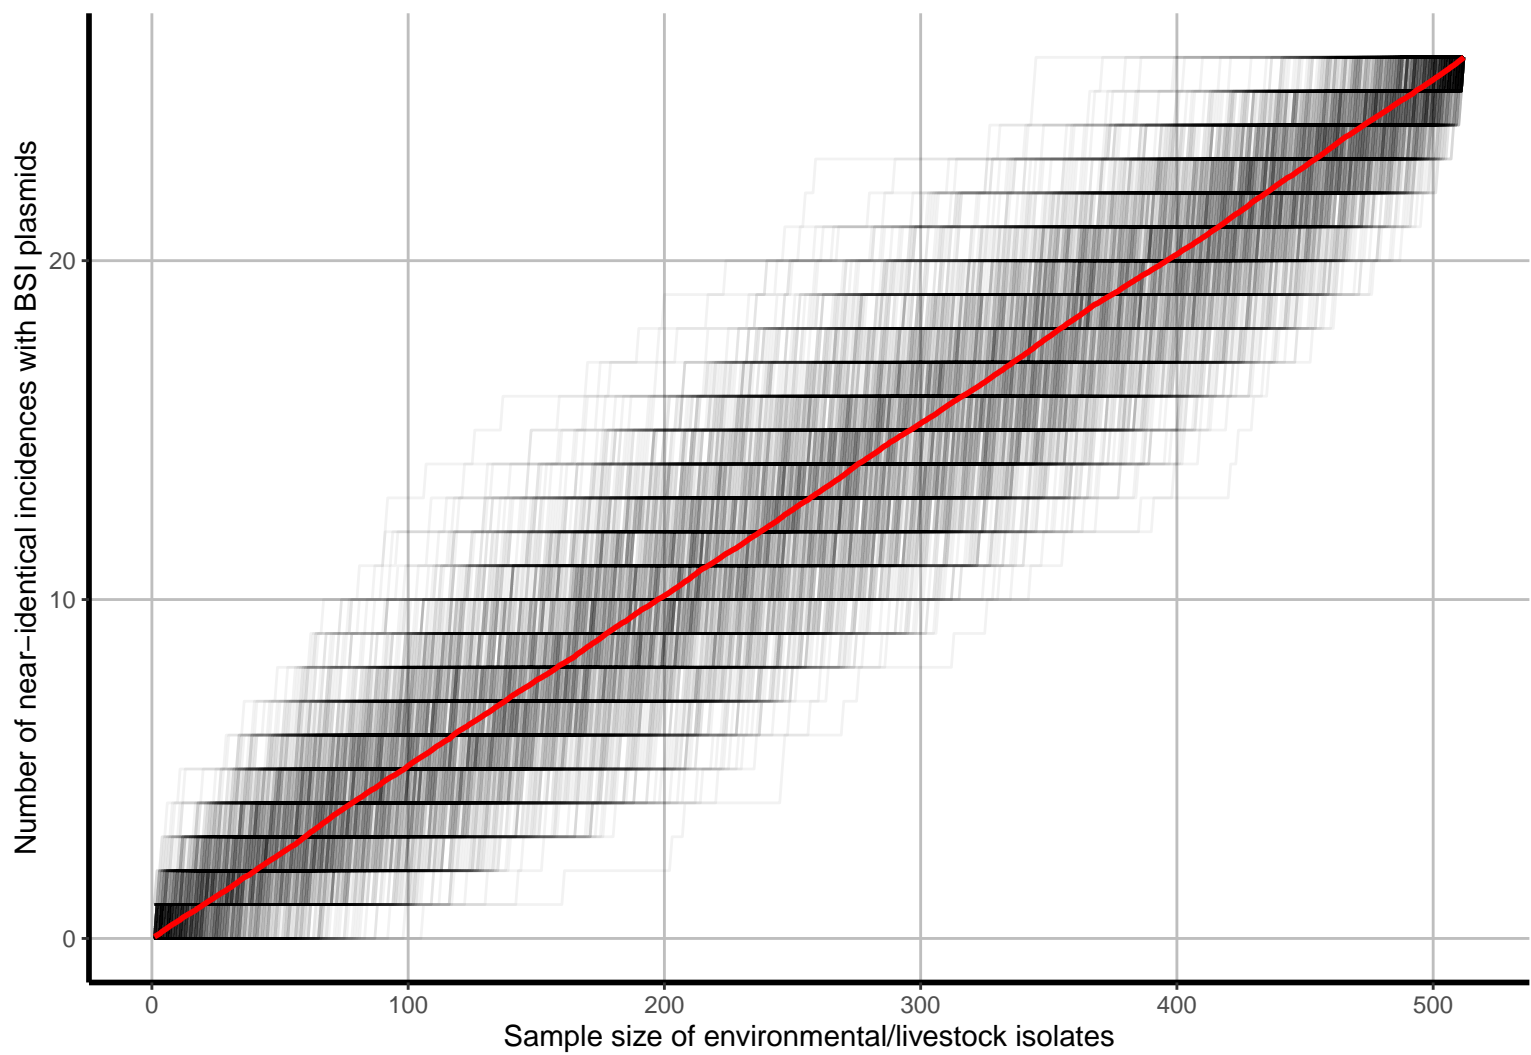

Supplement: supp [file elife-85302-supp-v1.zip]

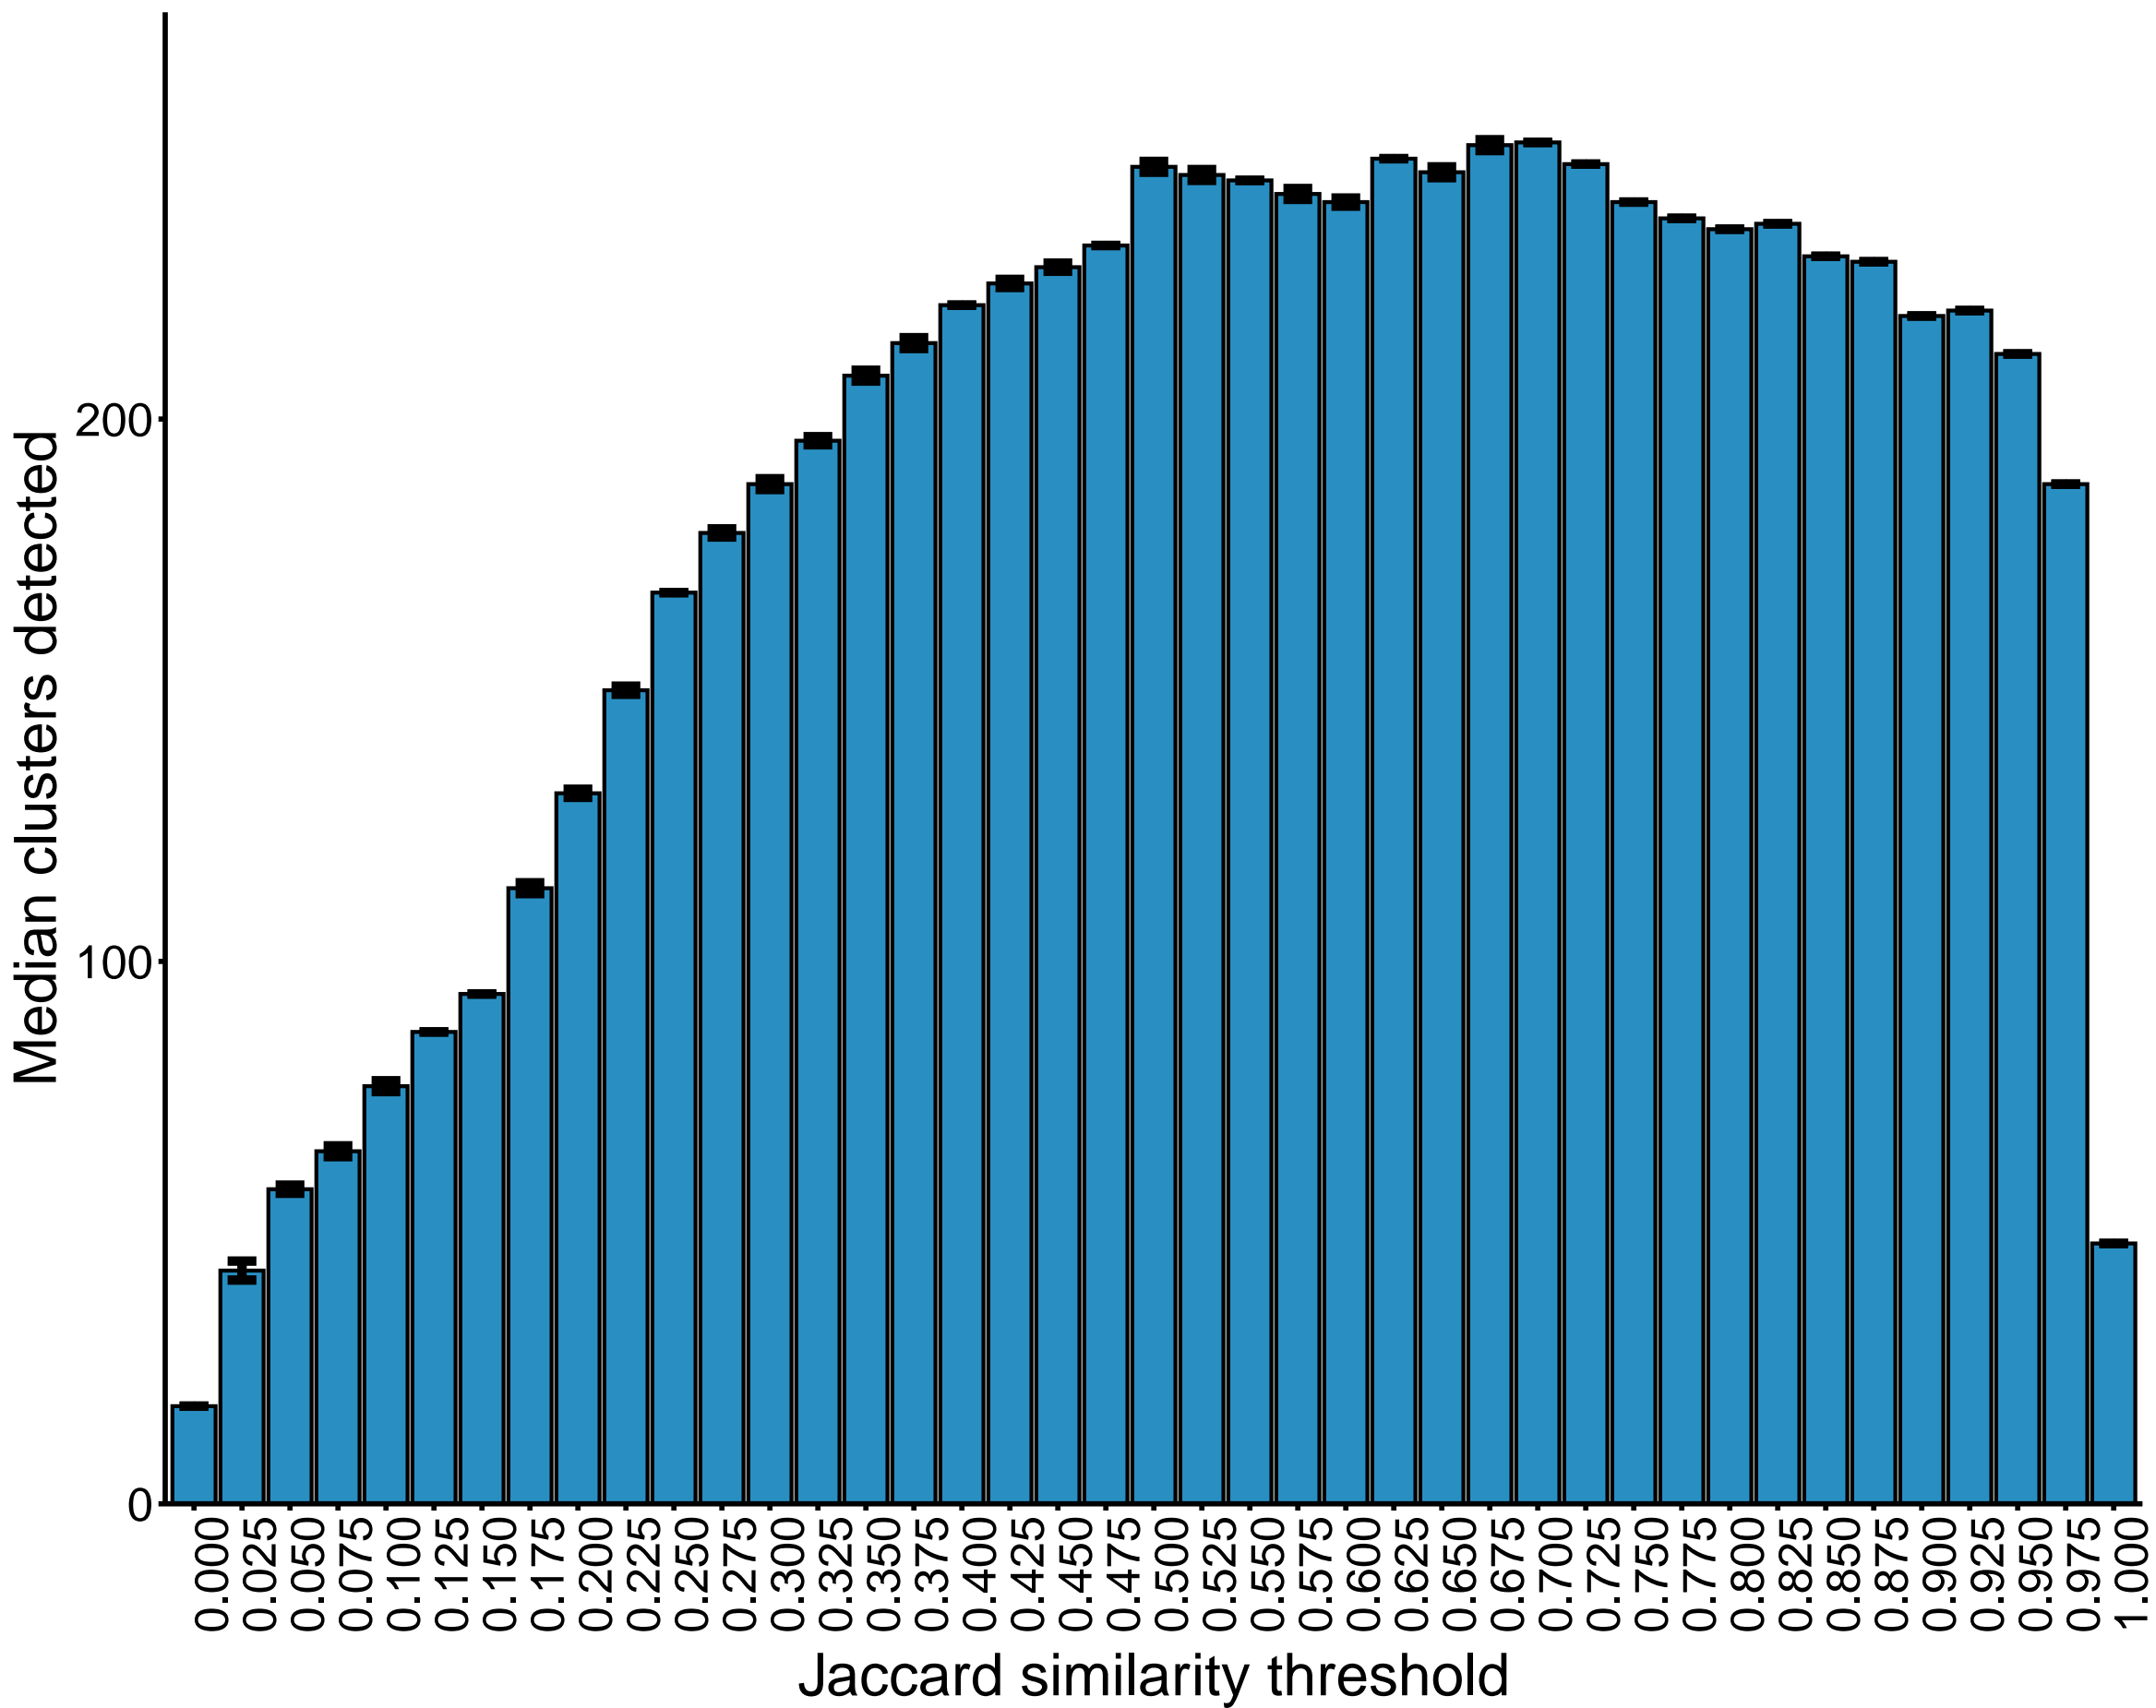

Supplement: supp [file elife-85302-supp-v1.zip]

# Network Component Evolution

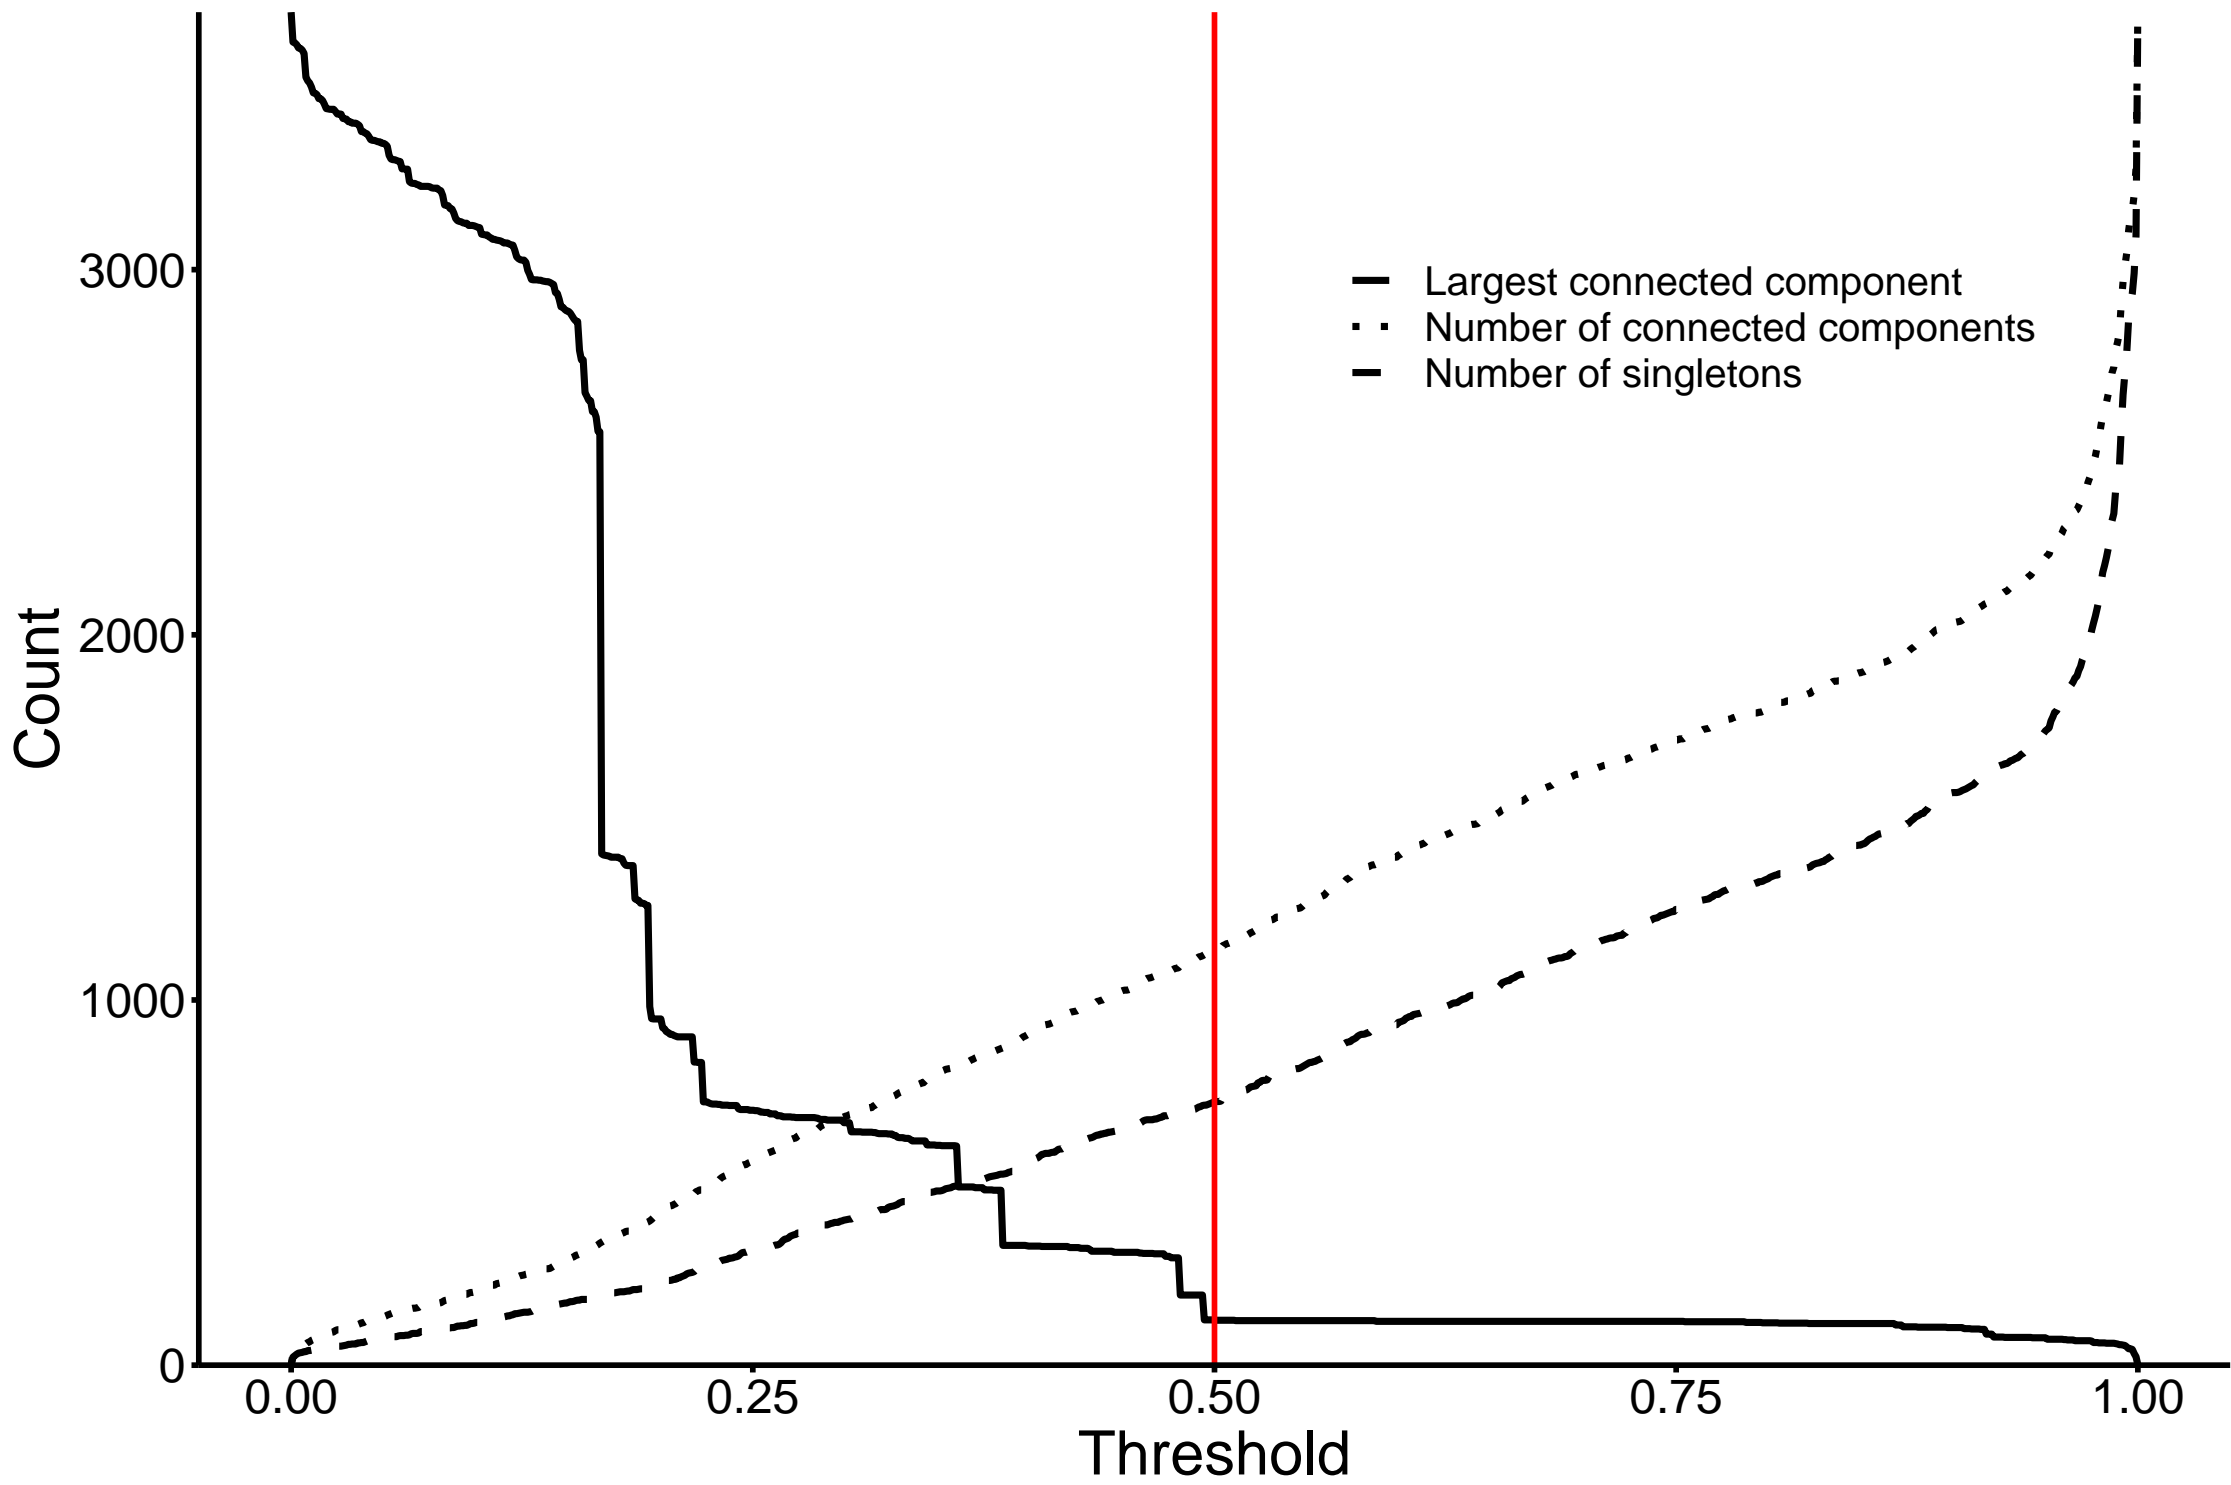

Supplement: supp [file elife-85302-supp-v1.zip]

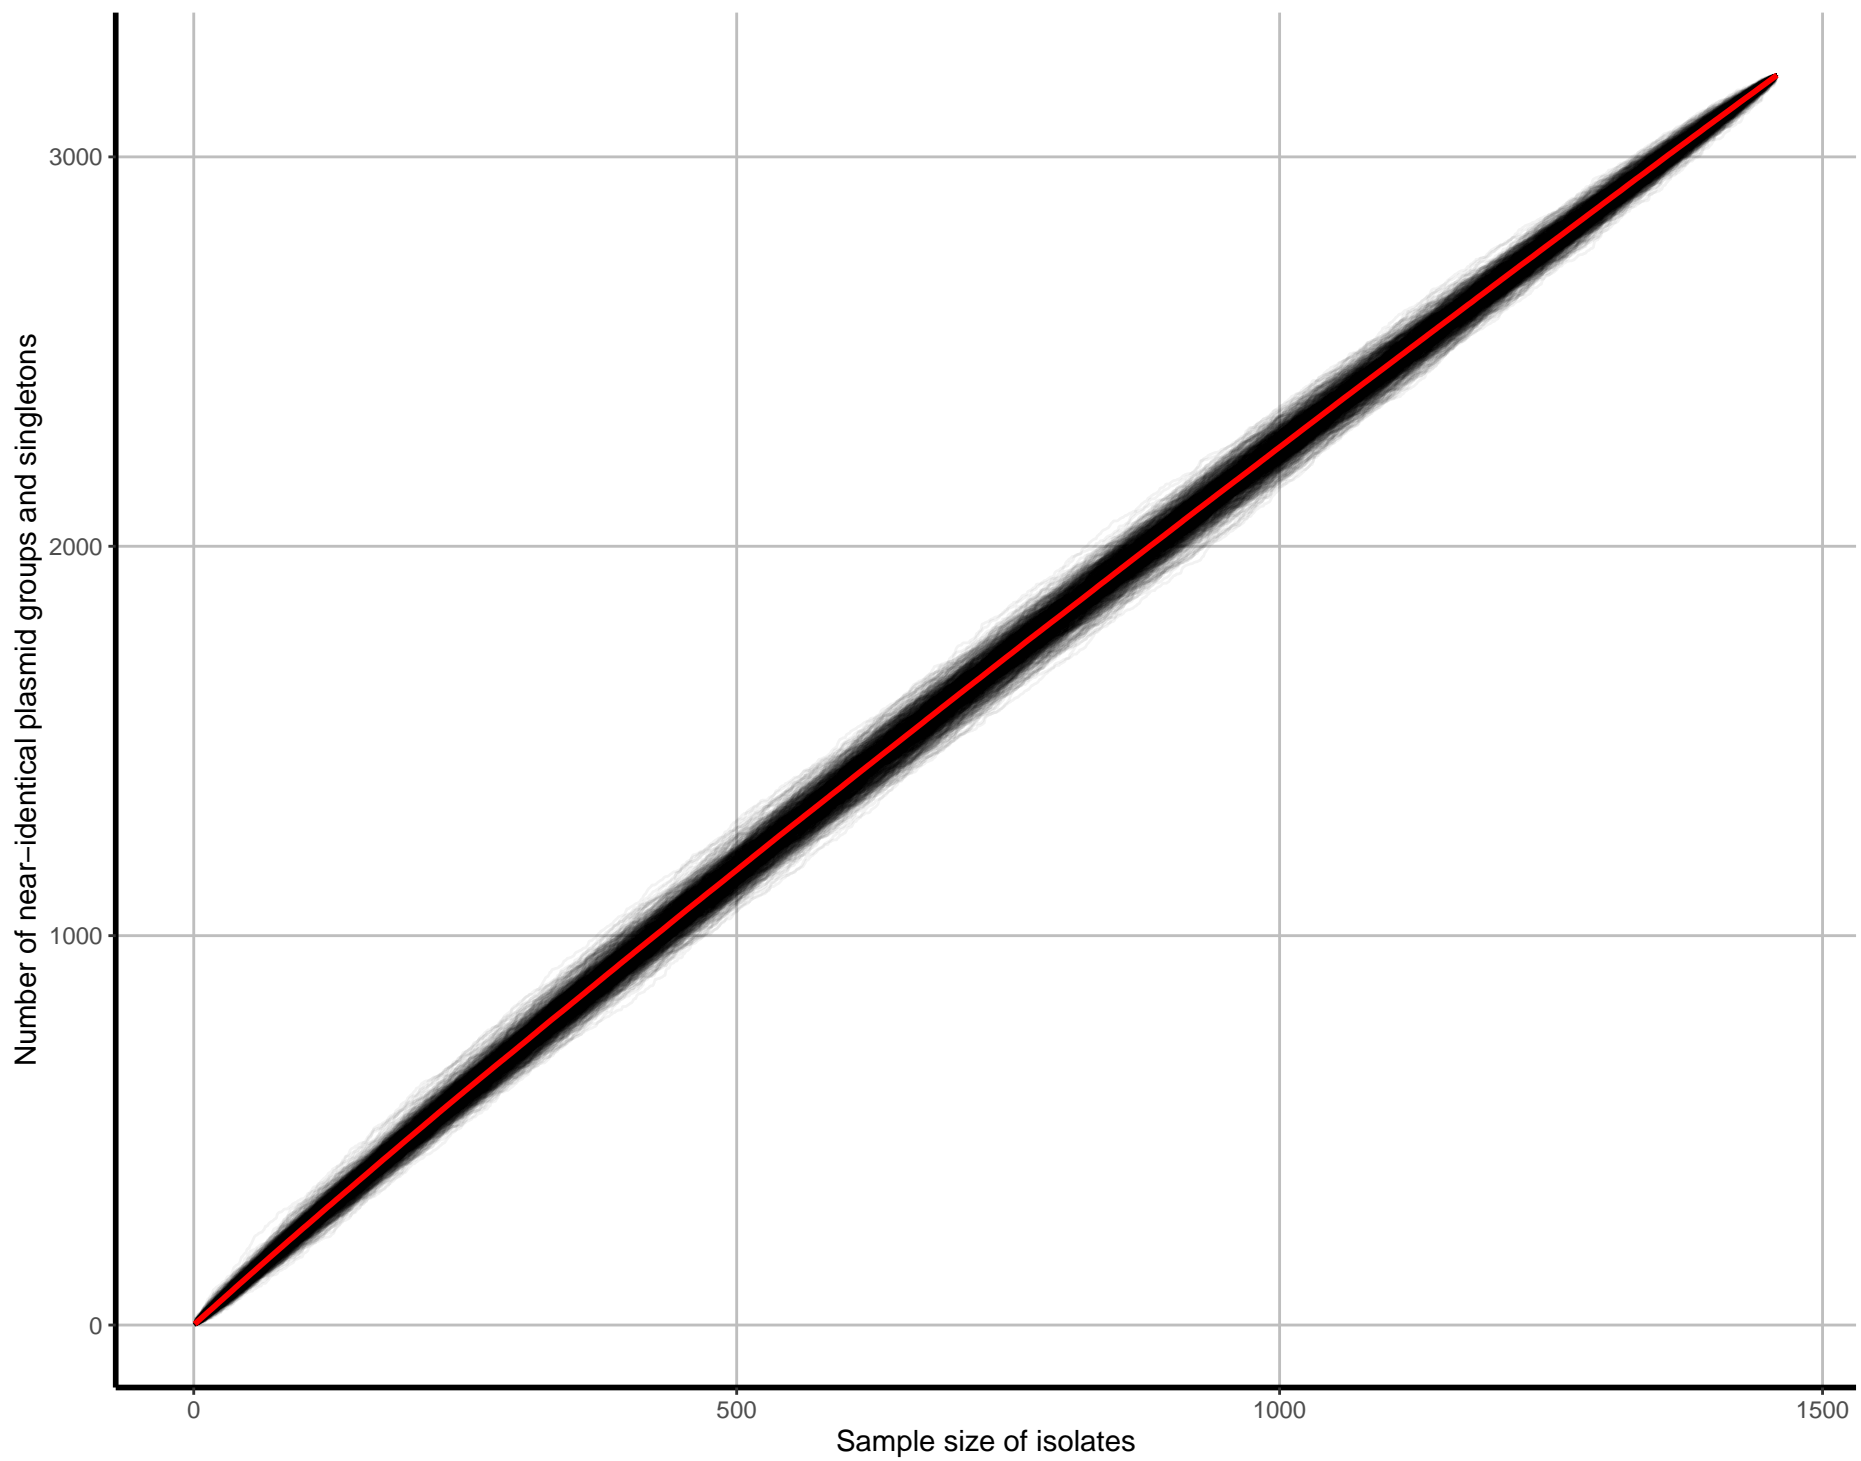

Supplement: supp [file elife-85302-supp-v1.zip]

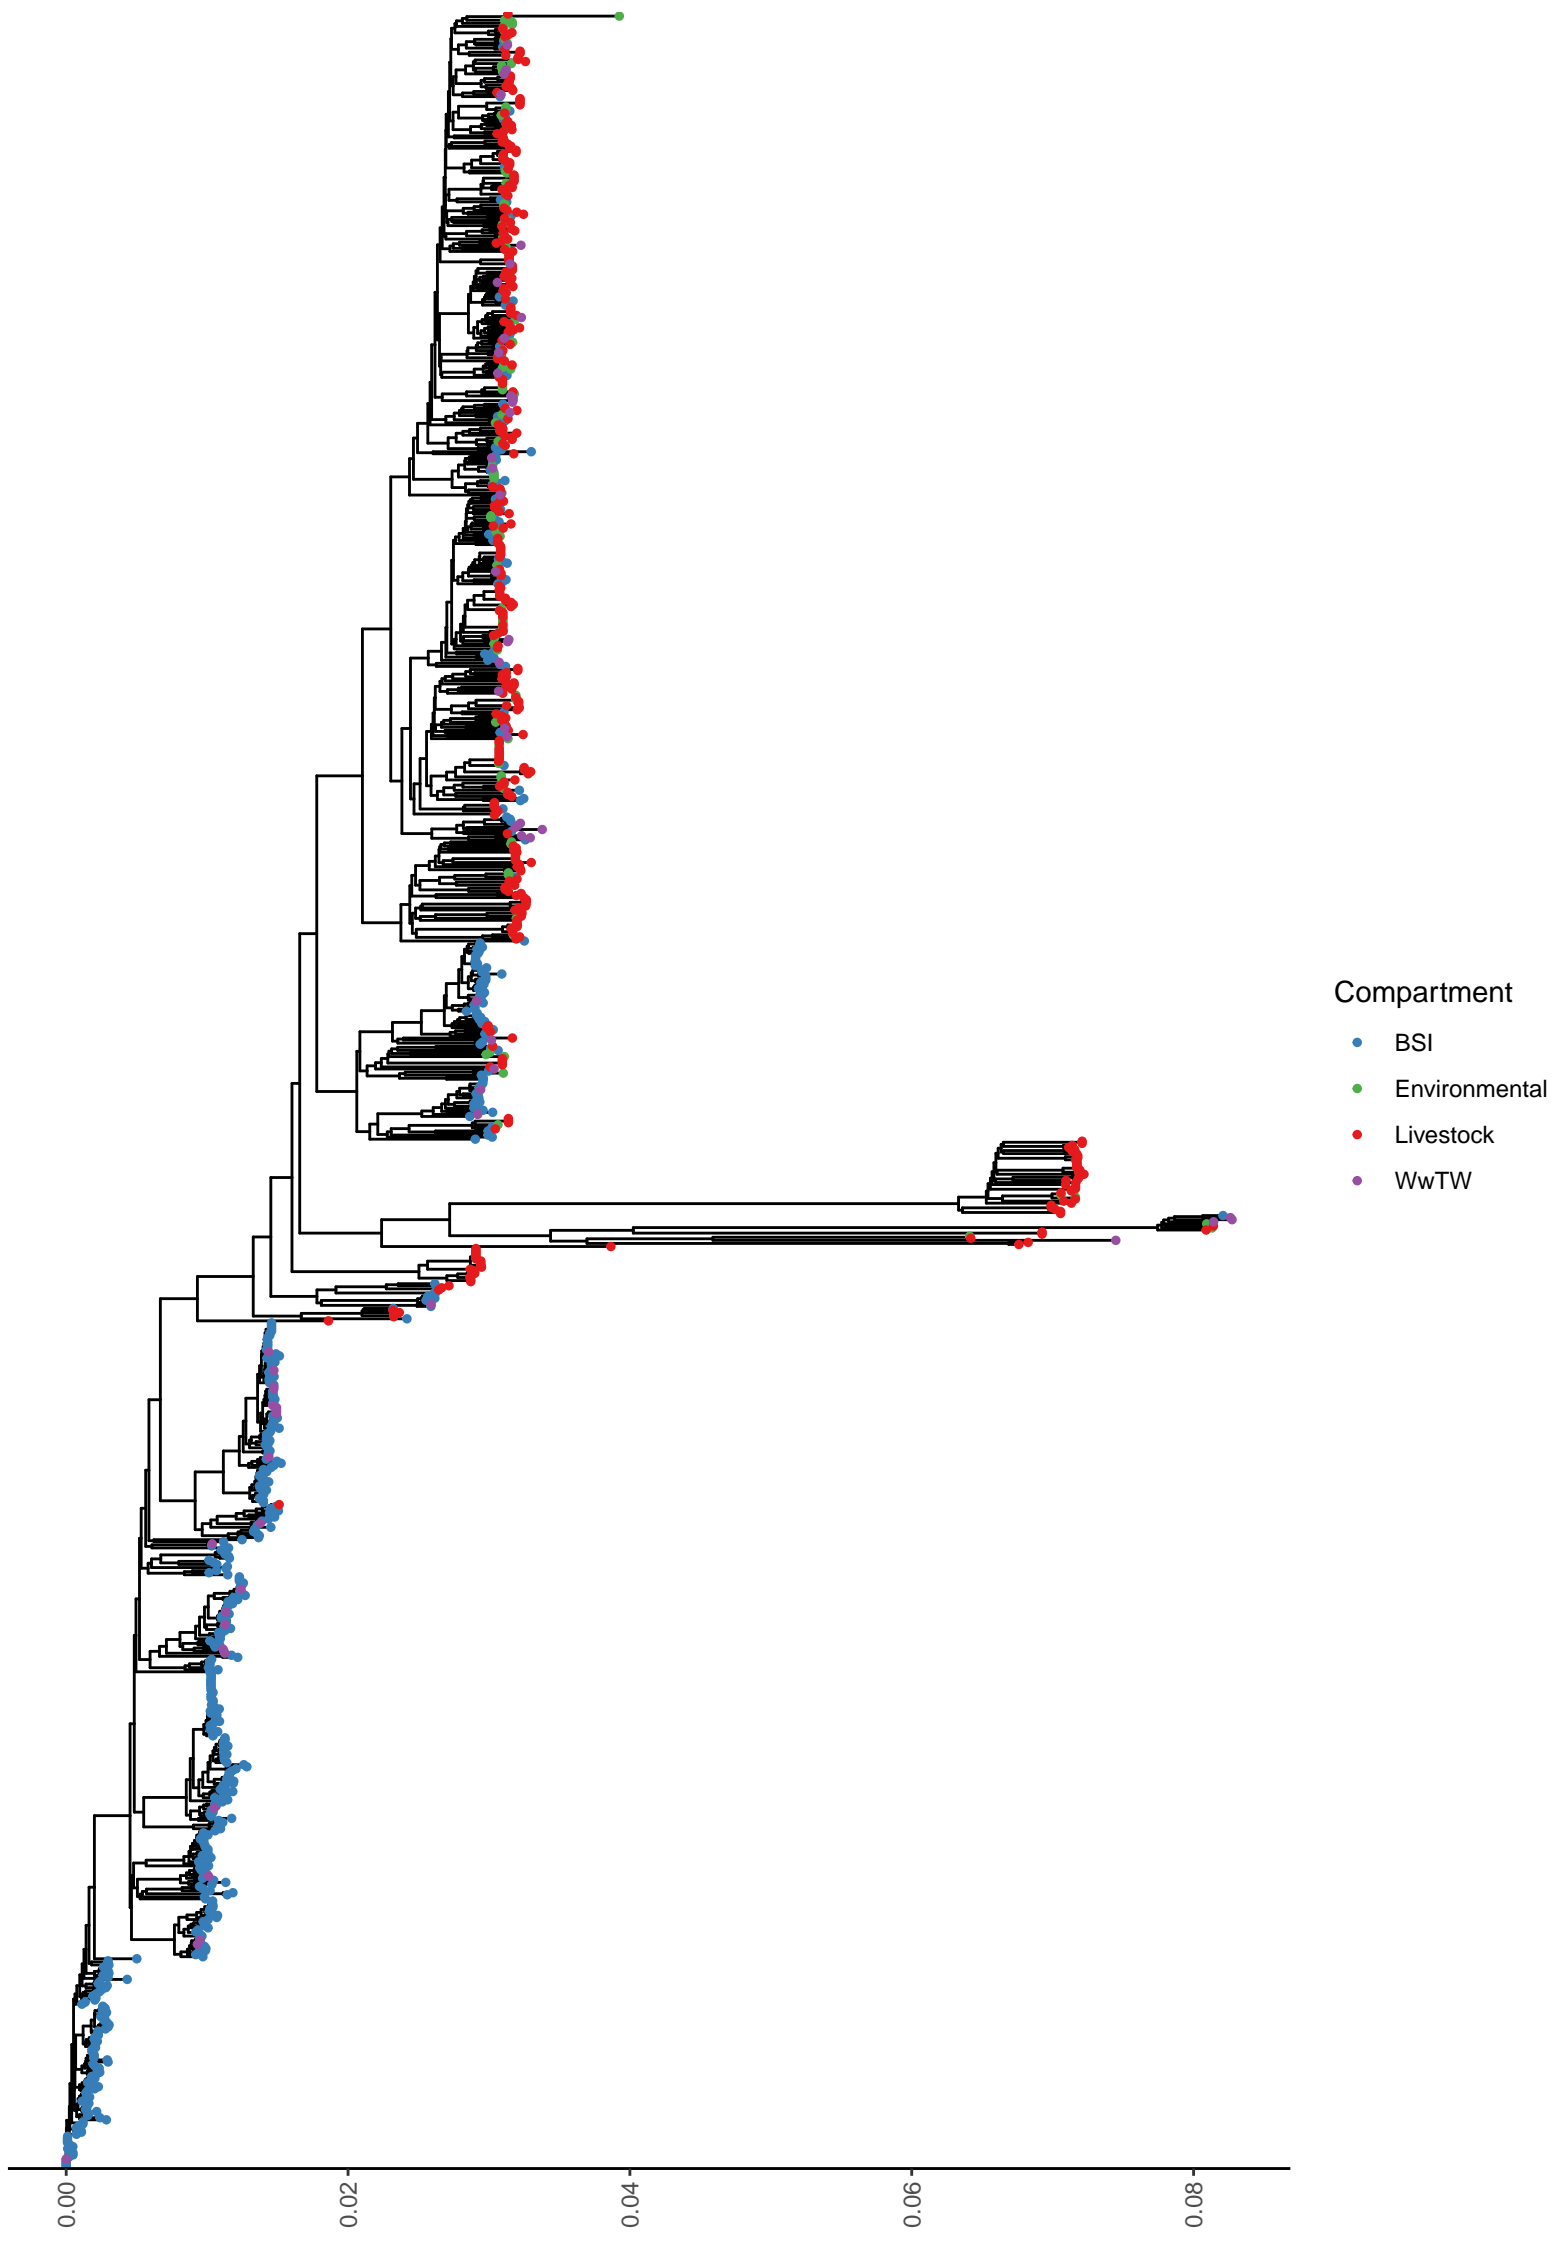

Supplement: supp [file elife-85302-supp-v1.zip]

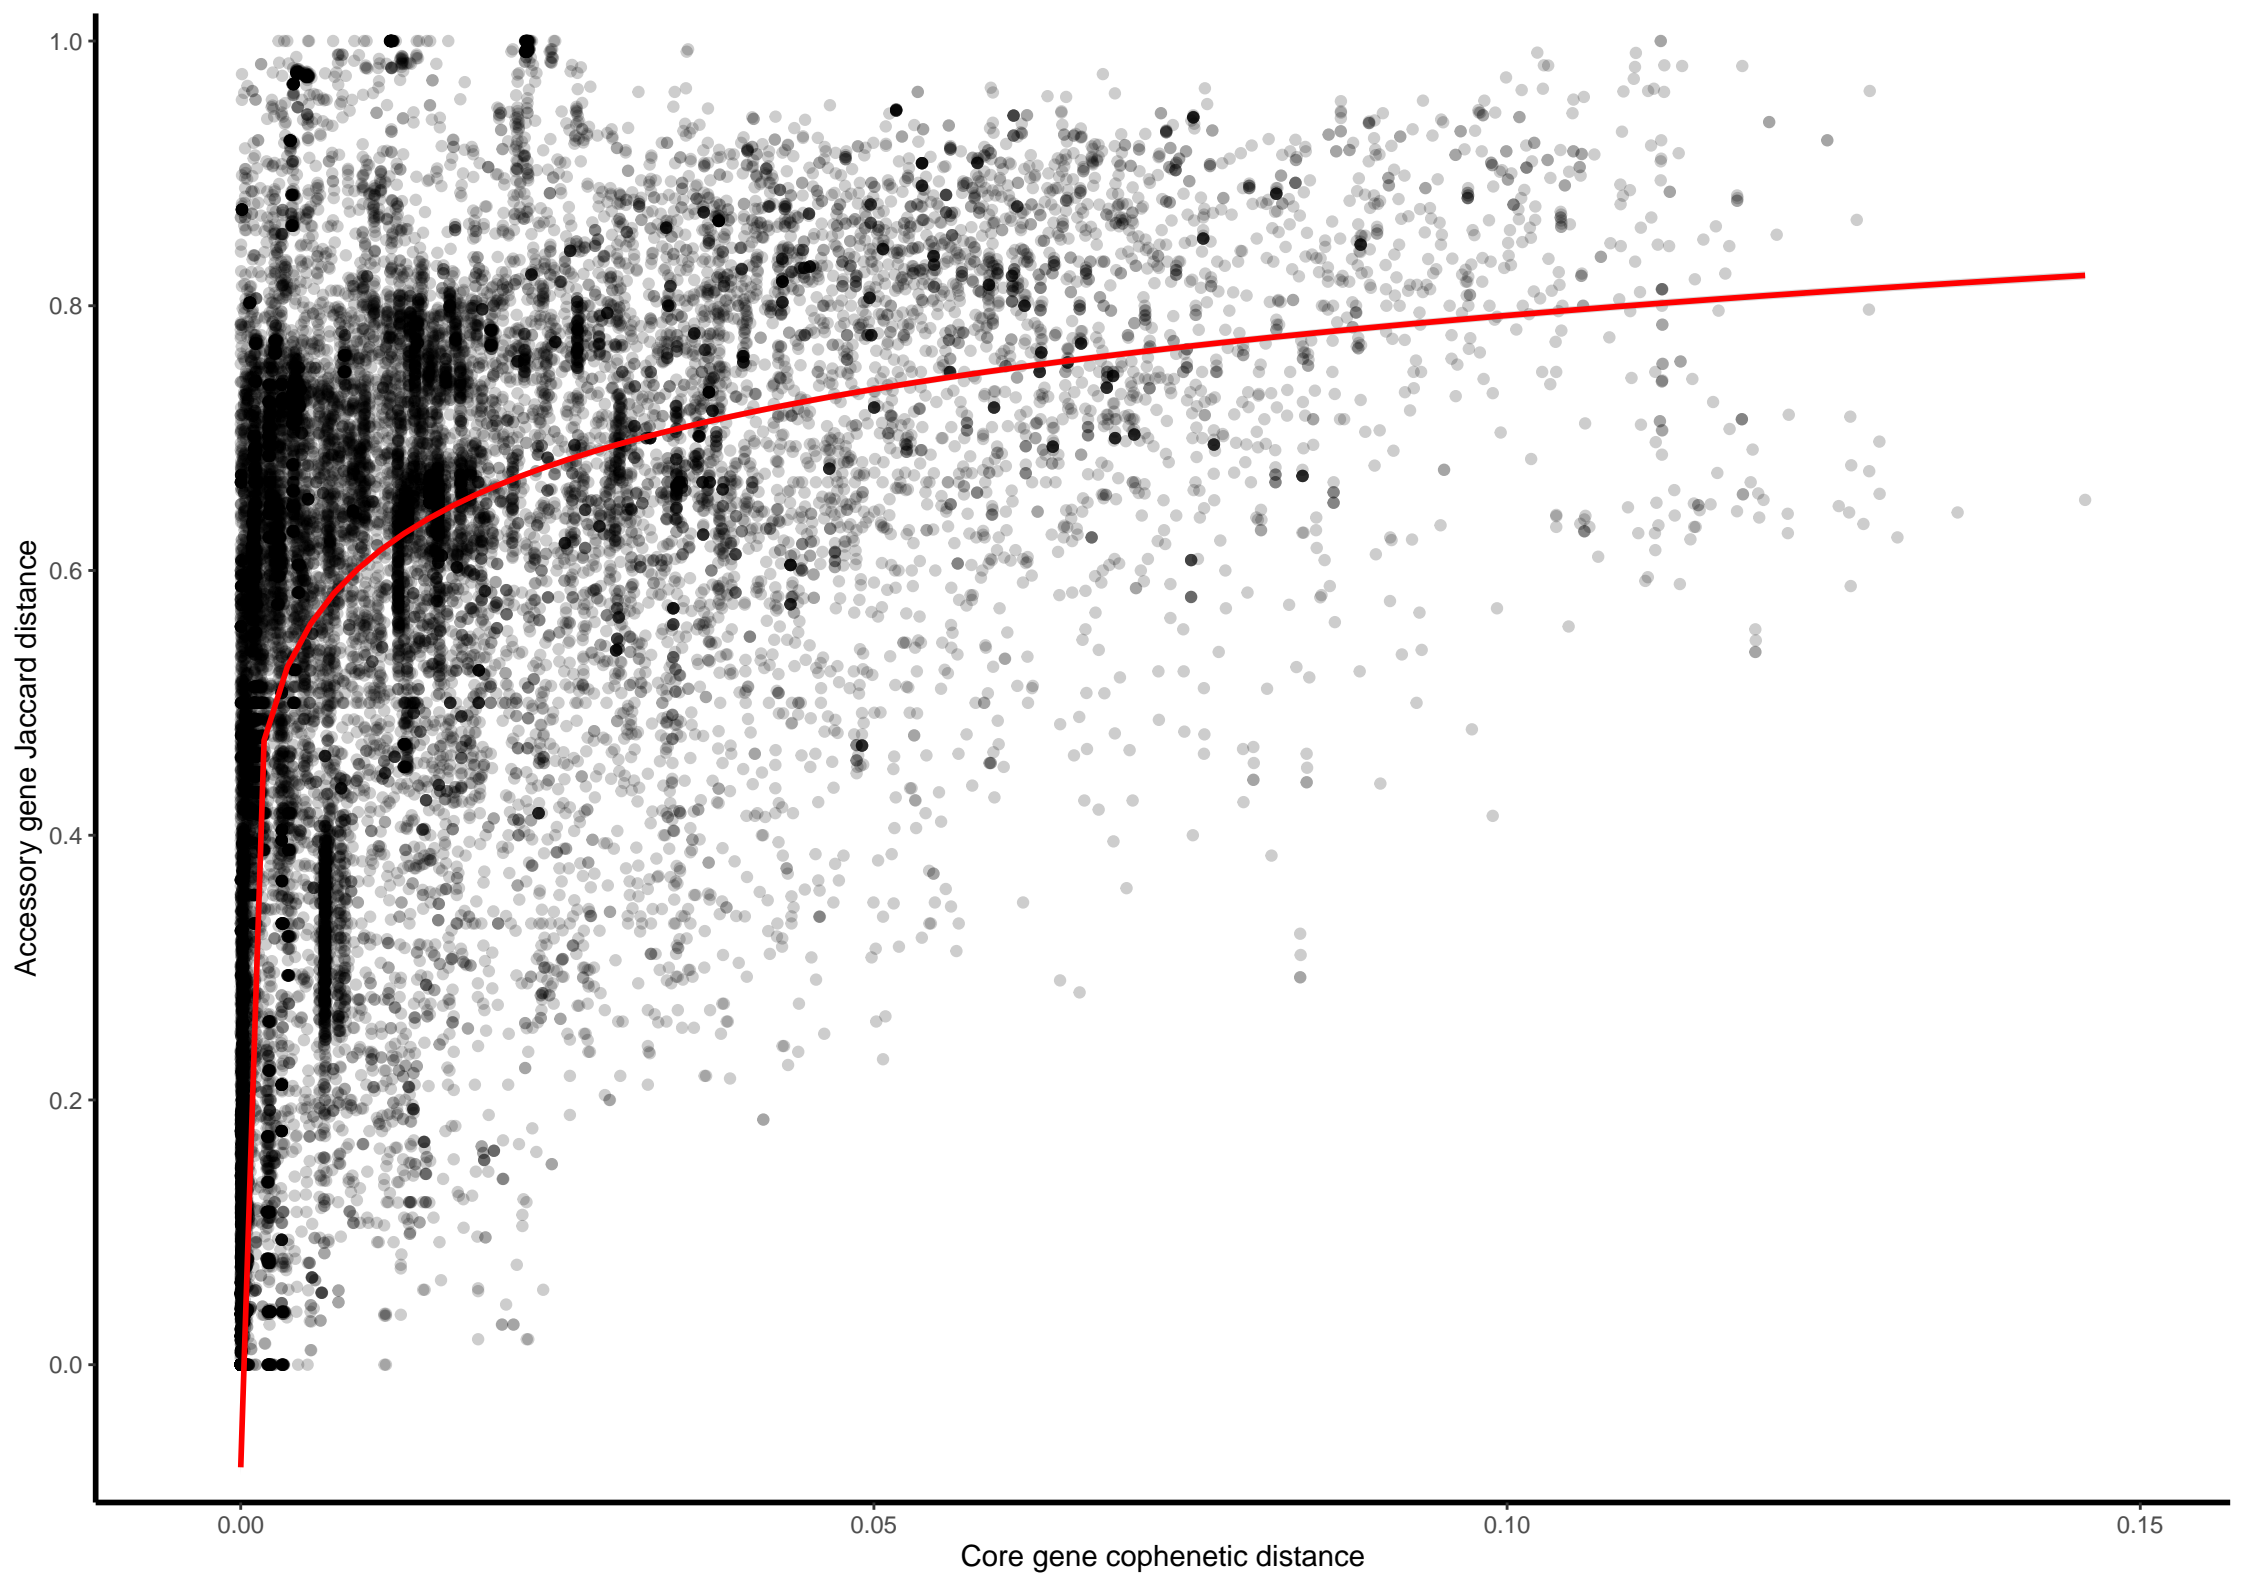

Supplement: supp [file elife-85302-supp-v1.zip › elife_poa_e85302_Appendix_1_figure_8.pdf]
